# Supplementary material
Source: PubMed Central journal article supplement (PMC6711380)
Supplement: NIHMS1044514-supplement-8.pdf [file NIHMS1044514-supplement-8.pdf]

## Supplementary Methods

### **a) Study design**

This study was designed as an investigator-initiated clinical study to investigate the molecular signatures of AD and psoriasis. Procedures were conducted according to the Declaration of Helsinki principles. Informed written consent was obtained from human subjects under a protocol approved by the local ethics board at the University Hospital Schleswig-Holstein, Campus Kiel, Germany (reference: A100/12). Adult patients with a history of AD or psoriasis for at least 3 years attending the dermatology department as well as adult volunteers without personal or familial history of atopic and chronic-inflammatory diseases of German ethnicity were invited to participate. Inclusion criteria for patients were a dermatologist-confirmed diagnosis of active chronic plaque-type psoriasis or AD. Exclusion criteria were presence of any other chronic skin disease, systemic treatment with immune-efficient medication ever, and topical treatment within one week prior to material sampling. AD or psoriasis was diagnosed on the basis of a skin examination by experienced dermatologists according to standard criteria (for AD, the American Academy of Dermatology Consensus Criteria were used) (Boehncke and Schon, 2015, Weidinger and Novak, 2015). From all participants, 9 ml of blood (collected into EDTA) as well as 5mm skin punch biopsies from the upper extremities (under local anesthesia) were obtained. From control individuals, a single biopsy was taken, while pairs of biopsies were taken and from adjacent (at least 50 mm from active lesions) clinically normal (i.e. no signs of erythema, edema, crusting, thickening, scaling or scratch marks) skin in psoriatic or AD patients. Skin tissue specimen were stored in PaxGene tissue containers (PreAnalytiX, Hombrechtikon, Switzerland) at -80°C according to the manufacturer's manual until further processing. A detailed cohort description can be found in **Supplementary Table 1**.

### **b) Filaggrin gene genotyping**

Genomic DNA was isolated from peripheral EDTA blood with the automated chemagic Star workstation protocol (Hamilton Company, Reno, NV) and used to determine the *filaggrin* gene (FLG) status of AD patients and healthy controls. The four most common European mutations R501X, 2282del4, R2447X and S3247X were analyzed with the TaqMan allelic discrimination

method (Applied Biosystems, Carlsbad, CA) following the standard procedures based on the manufacturer's reagents. Probe detection was performed with the Applied Biosystems 7900HT Fast Real-Time PCR System. Results are presented in **Supplementary Table 1**.

***c) Sample processing***

Total RNA was isolated from PAXgene® fixed tissue samples using the AllPrep DNA/RNA Mini Kit (Qiagen, Hilden, Germany) following the manufacturer's specifications. Samples of cases and controls were randomly distributed across the plates and pools before sequencing to minimize batch effects; in total we used 3 runs to obtain RNA-seq data. Preceding RNA isolation all samples were disrupted using innuSPEED Lysis Tubes W (1,4 - 1,6 mm steel beads & 3,5 mm ceramic beads) (Analytik Jena, Jena, Germany) in a SpeedMill Plus (3x 1min intervals) (Analytik Jena) together with 600µl of RLT-Plus-Buffer (Qiagen) including β-Mercaptoethanol and additionally homogenized with QIAshredder spin-columns (Qiagen). In order to assure sufficient concentration, integrity and purity of isolated RNA all samples were measured with the Qubit 2.0 Fluorometer (Qubit RNA HS Assay) (LifeTechnologies, Carlsbad, CA) and the 2200 Tape Station (R6K ScreenTape Assay) (Agilent, Santa Clara, CA) following the manufacturer's instructions. Only samples with a concentration of >50ng/µl, an OD260/280 ≥1.8 and a RNA integrity number (RIN) >7 were included in subsequent library preparation and sequencing.

***d) RNA library preparation and sequencing***

RNA samples were prepared for sequencing using the Illumina Truseq® Stranded total RNA Protocol in combination with the RiboZero rRNA removal Kit, and sequenced on the HiSeq2500 in pools of 10 samples with 2x125bp, producing paired-end reads according to the manufacturer's protocol (Illumina, San Diego, CA). The case and control samples were randomly distributed across the plates and pools before sequencing to minimize batch effects. We sequenced libraries prepared from total RNA extracted from 147 skin biopsies (38 control;

27 psoriasis non-lesional (NL); 28 psoriasis lesional (LL); 27 AD NL; 27 AD LL) donated by 93 individuals.

**e) *RNA-seq data processing***

Low quality reads were filtered from the data using the Illumina CASAVA FASTQ filter. Illumina standard primers were trimmed, and the quality of the data was assessed using FastQC (vs 0.11.3) (Andrews, 2010). Paired reads were mapped to the human reference genome (b37) using STAR (Dobin et al., 2013), only uniquely mapped read pairs were retained. Number of reads for each gene was counted using HTSeq (Anders et al., 2015), only genes with on average  $\geq 1$  read/sample were used in our analysis. TMM was used to normalize the RNA-seq data (Robinson and Oshlack, 2010), and we applied voom transformation to model the mean-variance relationship of the expression data (Law C. W. et al., 2014).

**f) *Statistical and bioinformatics analysis***

We conducted differential expression analysis between different conditions using empirical Bayes linear model as implemented in the limma package (Ritchie et al., 2015), controlling for individual specific effect (for nonlesional vs. lesional skin comparison) and gender effect (for normal vs. nonlesional/lesional skin comparison); False discovery rate (FDR)  $\leq 5\%$  and  $|\log_2$  Fold Change (FC)|  $\geq 1$  were used to declare significance. Functional enrichment analysis was performed using the hypergeometric test for pathways/functions compiled from Gene Ontology (Ashburner et al., 2000), KEGG (Kanehisa et al., 2012), and Biocarta (Nishimura, 2001), and only those with  $\geq 10$  and  $\leq 300$  annotated genes were examined;  $FDR \leq 10\%$  and Observed/Expected ratio  $\geq 2$  were declared significant. By using the current criteria (i.e.  $FDR \leq 5\%$  and with more than 2 fold change between two groups) and assuming  $>10\%$  of genes truly differentially expressed (with on average  $>500$  read counts/sample, estimated from our cohort)

from the 31,364 genes we examined, retrospective power calculation estimates >75% of statistical power (Guo et al., 2014).

For illustration purposes, we grouped similar functions and presented the groupings in a piechart using ClueGO (Bindea et al., 2009). To identify genes that are close to T-cell specific chromatin marks, we first retrieved T-cell H3K27ac peak signals from a previous study (Farh et al., 2015), and, for each cell type, we computed the cell-type specific ratio of each peak's by comparing the signal in the cell type with the average of the remaining cell types. The 10,000 peaks with the highest ratios for each cell type were screened for cell-specific genes within a 5k bp interval. We performed the classification task (e.g. psoriatic vs AD lesional skin) using the Random Forest classifier in the MLR package (Bischi et al., 2016), and the top features were selected according to backward selection with permutation importance; the final Area under Receiver Operating Characteristic (AUROC) was estimated (using the selected features) from three-fold cross validation with 100-repetitions.

We compiled the expert-curated chemical/drug -- gene interactions from the Comparative Toxicogenomics Database (CTD) (Davis et al., 2016), DrugBank (Law V. et al., 2014) and PharmGKB (Hewett et al., 2002), and the chemical/drug -- disease associations from CTD and National Drug File-Reference Terminology (NDF-RT) (Carter et al., 2002). Although these resources also include chemicals, we apply a lexicon to only include associations/interactions involving three types of drugs (antibiotics, clinical drugs and pharmacologic active substances). All the resources use customized identifiers for drugs and diseases, thus recognizing duplicates across the resources is challenging. We therefore replaced the drug identifiers with customized identifiers from our previous work (Raja et al., 2017), plus the diseases' concept identifier (CUI) from UMLS Metathesaurus.

### ***g) Cytokine stimulation in keratinocytes***

We determined whether the DEGs identified in our experiments were regulated by stimulations with various cytokines in keratinocytes. We obtained 50 normal human keratinocytes from 50 different healthy adults. Keratinocytes were grown in 12 well plate in 154 CF medium (Thermo Fisher #M154CF500) with human keratinocyte growth supplement (Thermo Fisher #S0015). Keratinocytes were grown to confluency at which time the complete medium (with supplements) was replaced by basal 154 CF medium (without supplements). Cells were then stimulated with cytokines (IL-4, IL-13, IFN- $\alpha$ , IFN- $\gamma$ , TNF- $\alpha$ , IL-17A, IL-36 $\alpha$ , IL-36 $\beta$ , IL-36 $\gamma$ , R&D Systems) individually at 10 ng/ml concentration. After 8 hrs cells were harvested and RNA was isolated using RNeasy Plus Mini kit (Qiagen # 74136). RNA was analyzed by RNA Nano Chips (Agilent Technologies) and sequenced (Sarkar et al., 2018).

### ***h) Immunohistology***

Sections were taken from formalin-fixed, paraffin-embedded biopsies. Tissue slides underwent thorough manual quality control check for the following parameters: dermis and epidermis present on the slide, tissue is well aligned on the glass without loss of large parts of the biopsy material, staining intensity is visible and present in the expected cell component. If any of the criteria were not met, reevaluation on freshly cut material from the identical biopsy was performed. If the second evaluation did not show concordance with the criteria, the slide was excluded from further processing for the digital image analysis. Tissue slides, stained with CD8, were digitally scanned at x20 magnification using a Hamamatsu Nanozoomer in brightfield mode. Quantitative image analysis was performed by on whole slide scanned images using Definiens Tissue Studio® software. A customized algorithm was developed per marker in Tissue Studio® using a subset of the study images. The customized algorithm was developed to accurately detect the whole tissue or if required, segment the specified regions of interest (ROI)

within the whole tissue section. Cellular analysis thresholds were then optimized per algorithm to specifically detect positive cells for the immunohistochemistry markers within the tissue ROI. The algorithms were then applied objectively to each section to quantify the required parameters. Evaluation was performed for total cell count (sum of epidermal and dermal cell counts) on the CD8 stains. The analyzed area was measured in mm<sup>2</sup> and based on the absolute cell counts calculation of cells per mm<sup>2</sup> was performed.

## Supplementary Figures

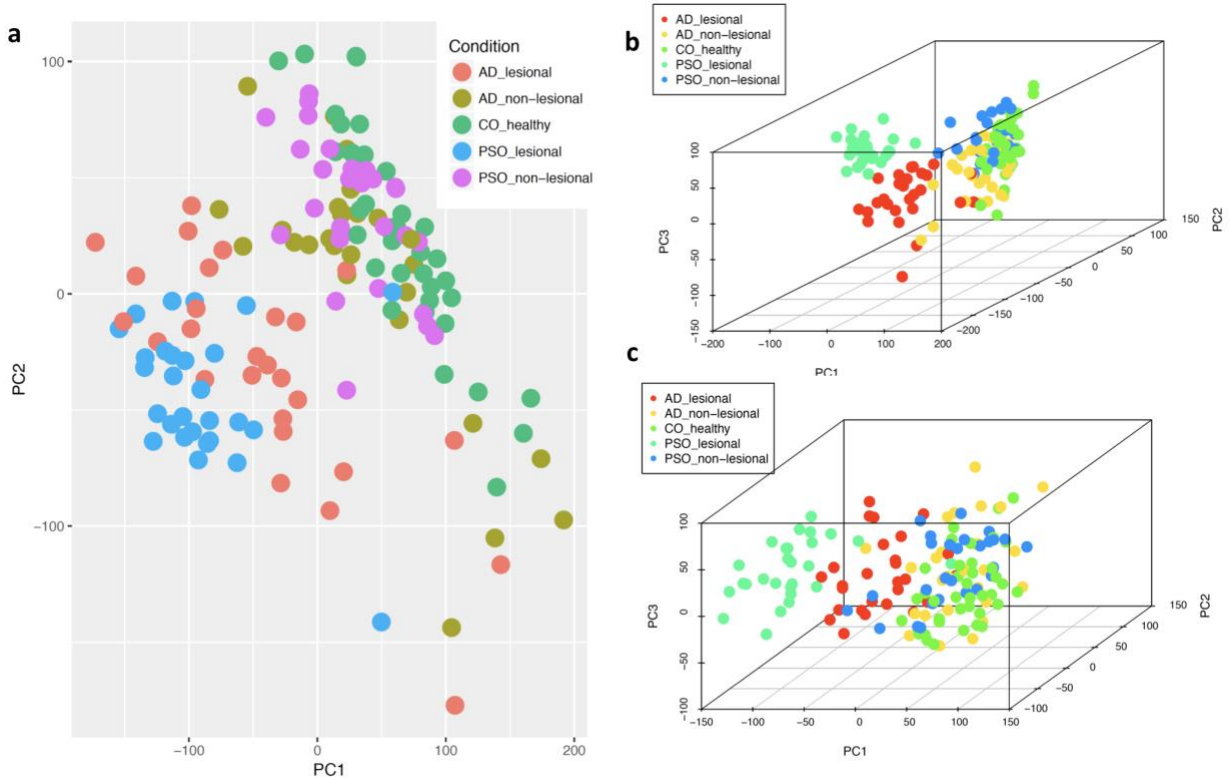

**Supplementary Figure 1.** a) top two principal components computed using the transcriptomes of the samples; b) the top three principal components using the transcriptome of the samples; c) the top three principal components after adjusting the batch variable estimated by the SVA algorithm.

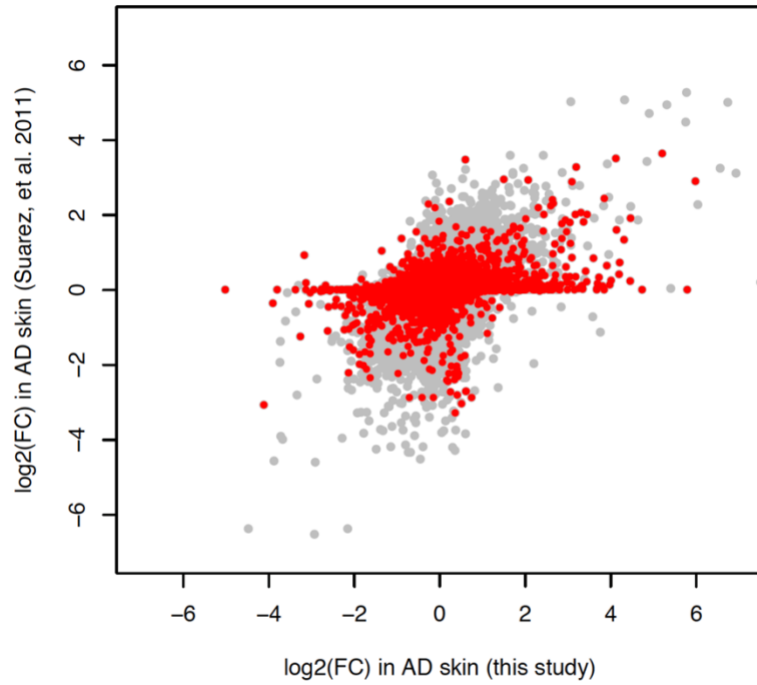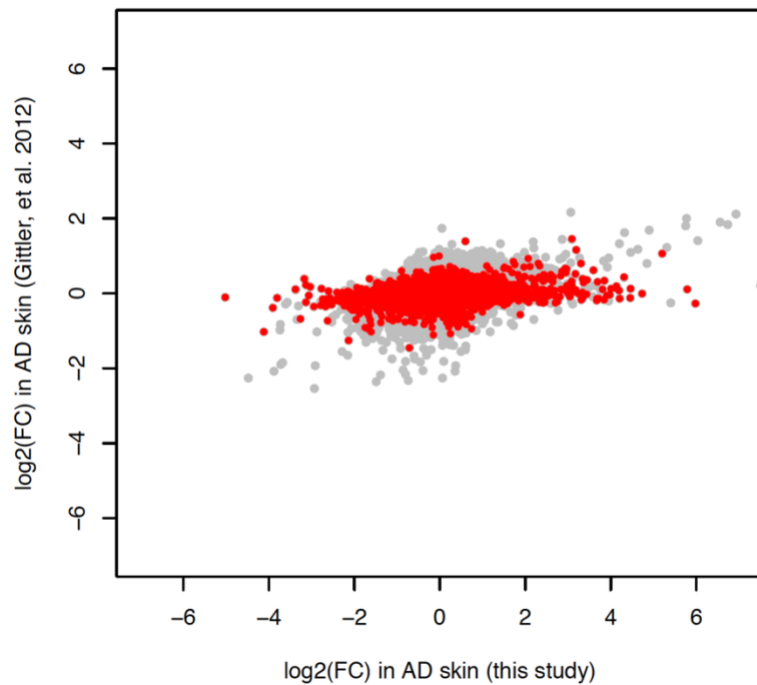

**Supplementary Figure 2. Comparing the magnitude of dysregulation (Fold Change in logarithmic scale) in AD skin measured in this study (x-axis) versus previous microarray studies. Each point represents a gene that is common in both platforms; red color represents genes expressing in the lower 25% of the transcriptome.**



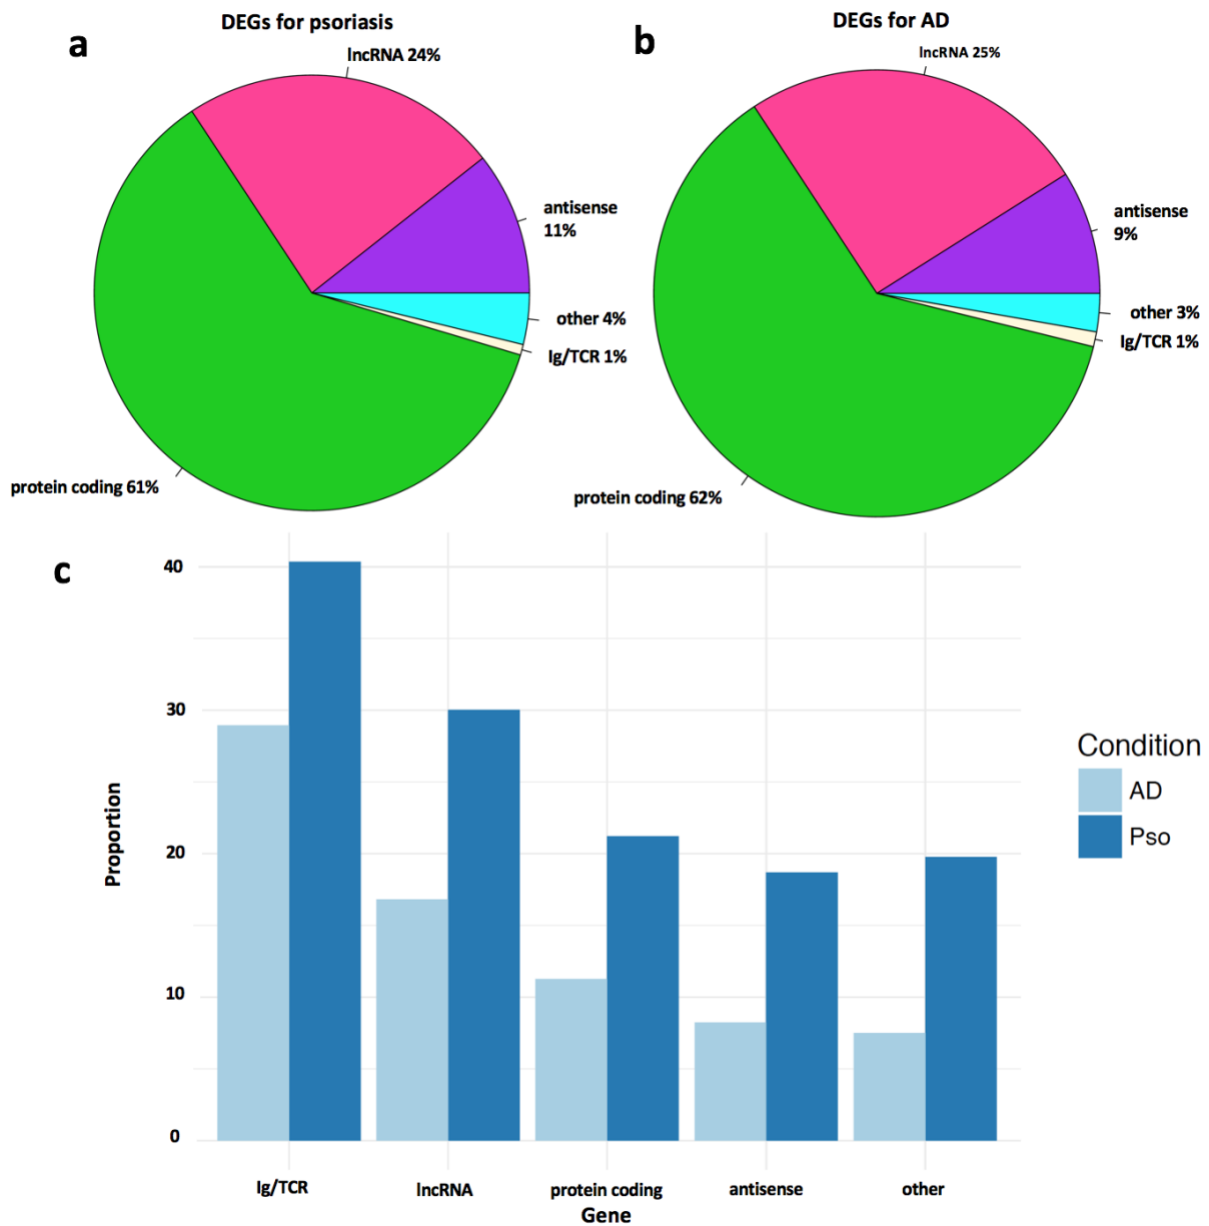

**Supplementary Figure 3. The proportion of different gene categories in the DEGs for psoriasis (a) and atopic dermatitis (b). (c). For each category, the proportion of DEGs.**

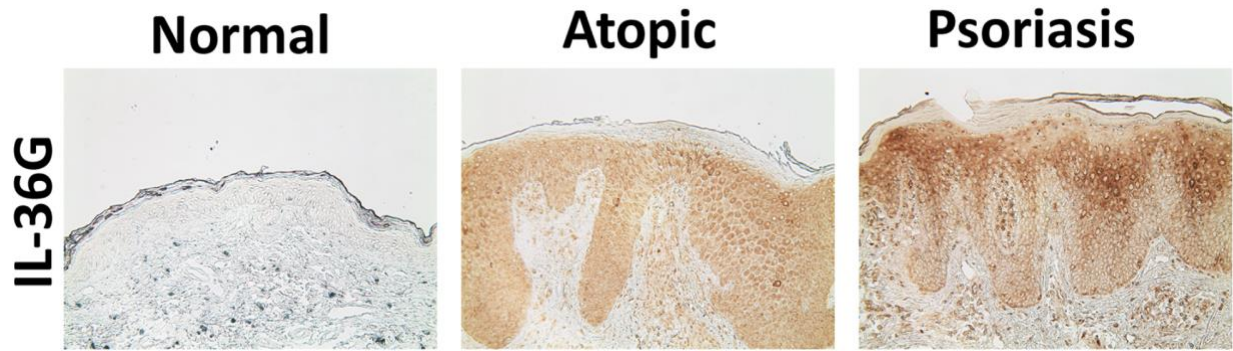

**Supplementary Figure 4. Immunohistochemistry illustrates the detection of IL-36G in the skin of atopic dermatitis and psoriasis, concordant with the expression data.**

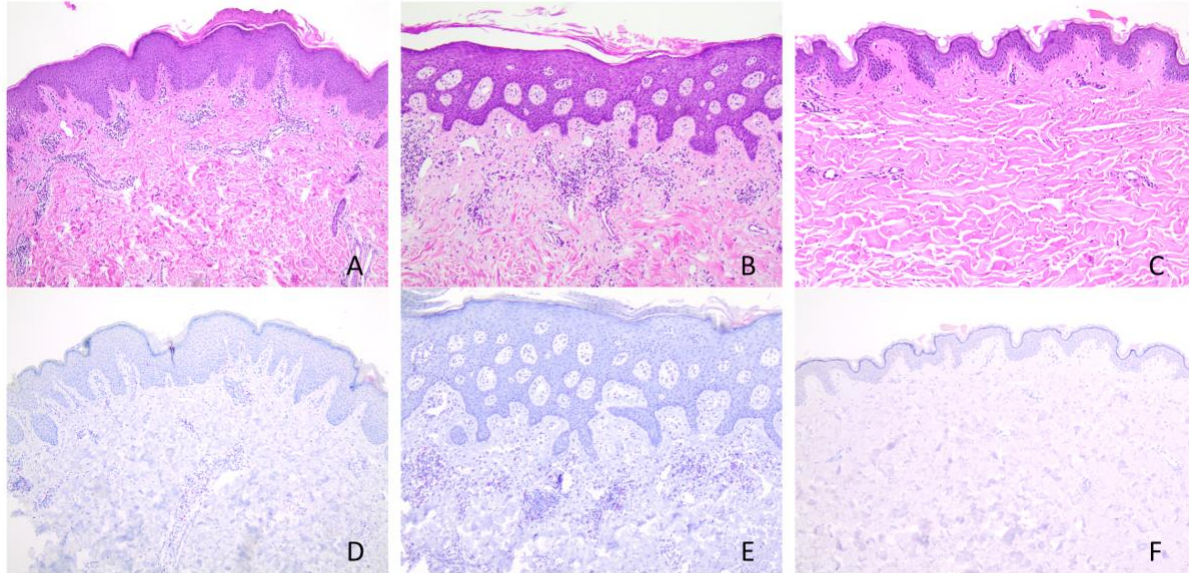

**Supplementary Figure 5. Lesional AD skin (A) with acanthotic thickening of the epidermis and parakeratosis. Perivascular infiltration of lymphomononuclear cells mainly in the dermis and focal epidermotropic lymphocytes. The lesional psoriatic skin (B) shows an acanthotic epidermis with parakeratosis and hypogranulosis and perivascular lymphomononuclear infiltrates in the upper dermis. The healthy control skin (C) displays a thin epidermis with regular structure and scarce perivascular lymphomononuclear infiltrates. CD8 is expressed in lymphocytic cells in the dermal compartment in lesional AD (D), lesional psoriasis (E) and control skin (F), accounting approximately for a quarter of all lymphocytes in each sample. In relation to the amount of lymphocytic infiltrates, the absolute count of CD8 positive cells is higher in D and E. Original magnification x100 in A-F.**

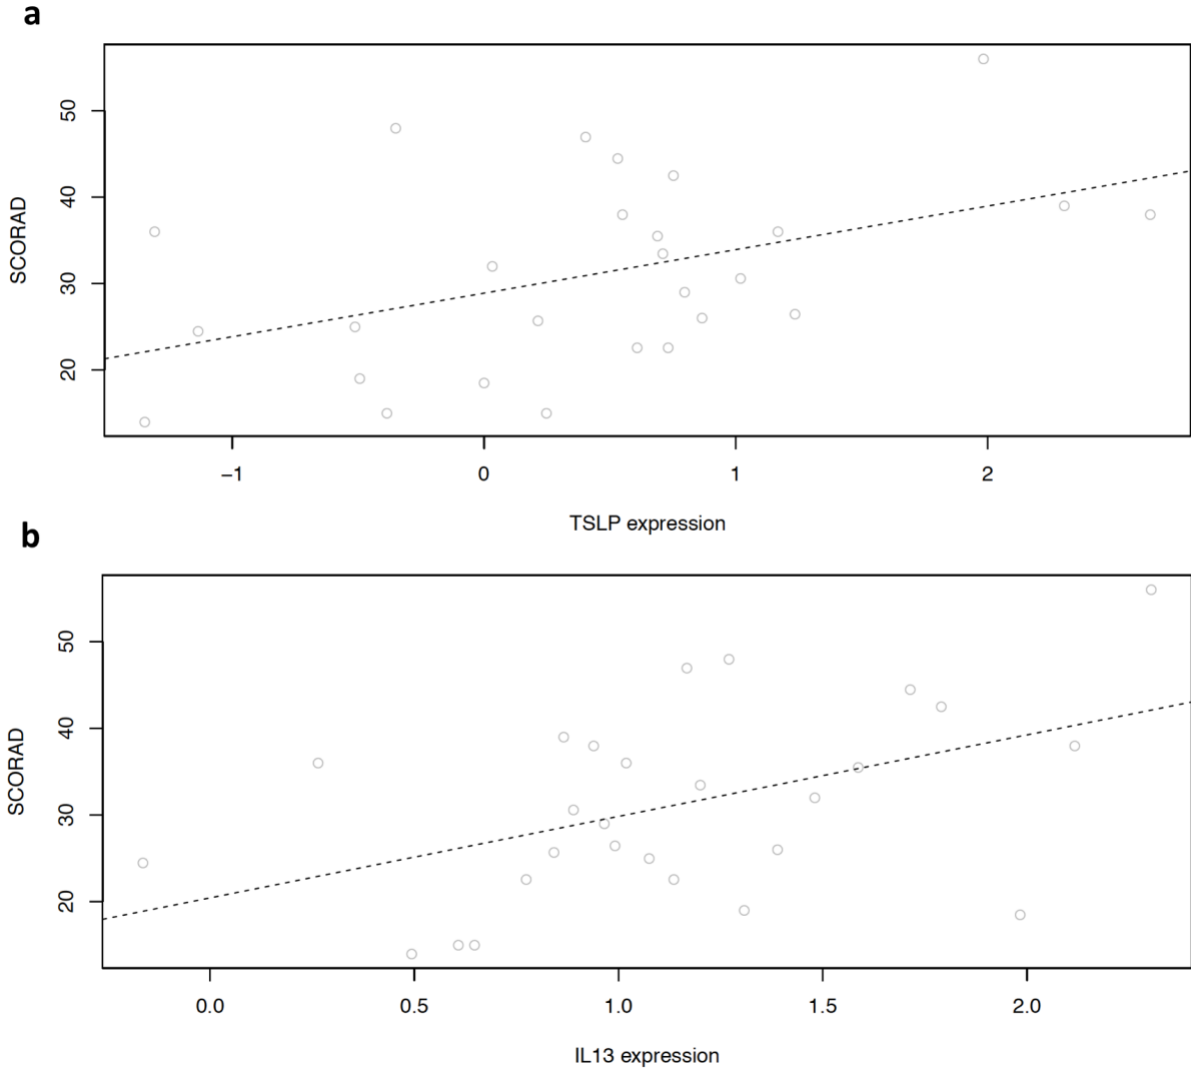

**Supplementary Figure 6. Correlation between SCORAD with normalized expression of TSLP (a) and IL13 (b) of AD lesional skin samples**

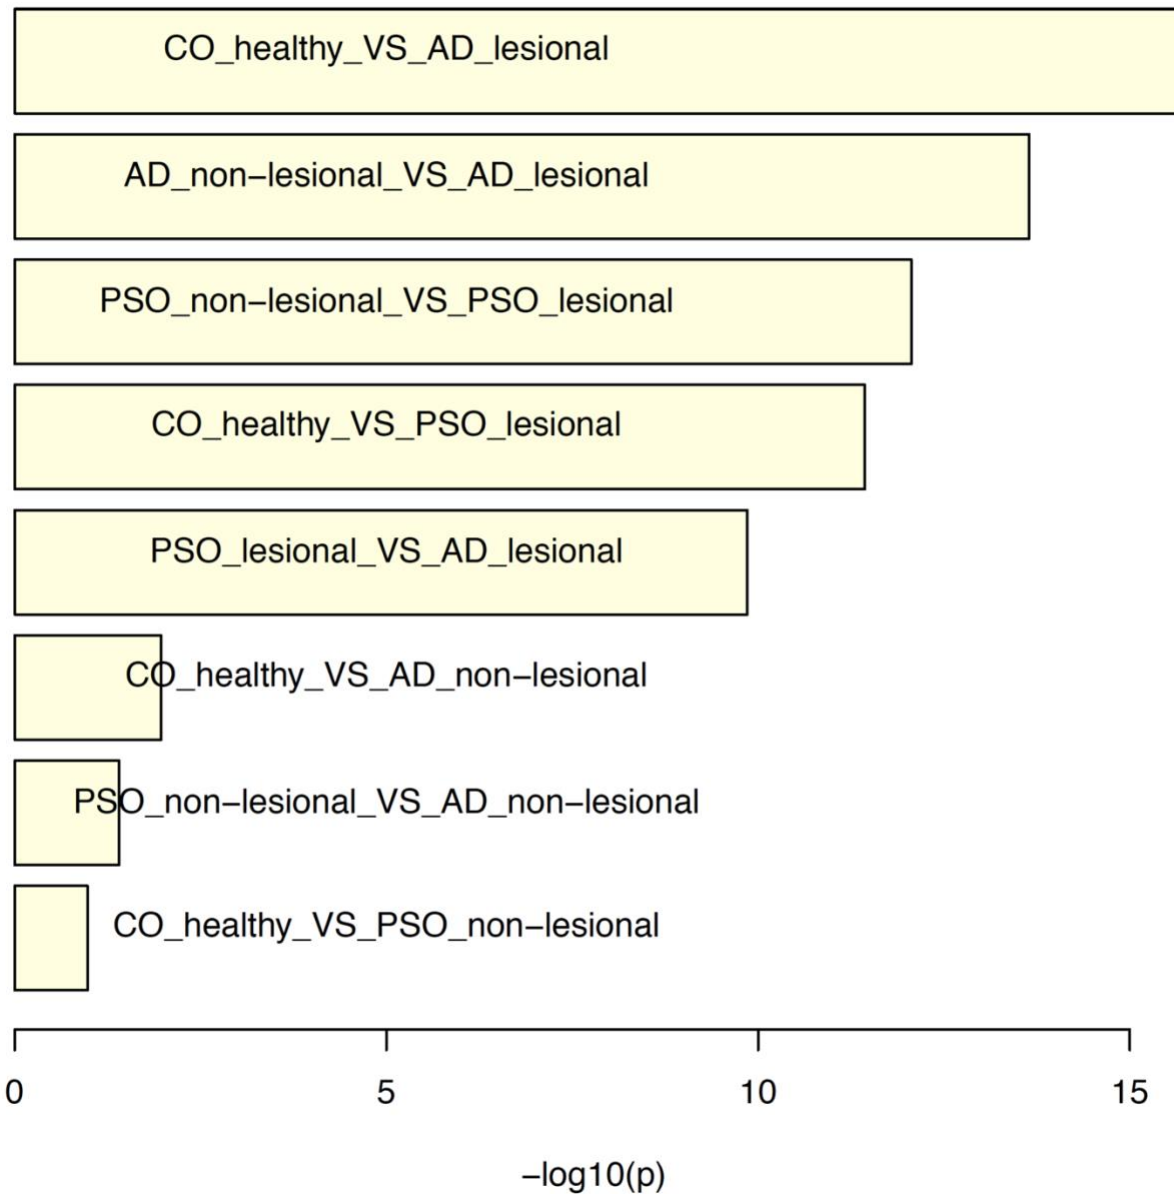

**Supplementary Figure 7. The enrichment analysis for AD drug targets among the genes dysregulated in different differential expression analysis.**

## Supplementary Tables

**Supplementary Table 1. Cohort description:** Continuous traits as mean and standard deviation for atopic dermatitis patients (AD), psoriasis patients (Pso) and healthy control individuals (Healthy). Filaggrin (FLG) status (R501X, 2282del4, R2447X, S3247X) determined in AD and healthy control individuals only.

|                                                 | AD                | Pso           | Healthy       |
|-------------------------------------------------|-------------------|---------------|---------------|
| Number of individuals (male/female)             | 27 (17/10)        | 28 (14/14)    | 38 (16/22)    |
| Age                                             | 34.07+/-10.96     | 41.89+/-15.74 | 32.63+/-11.64 |
| Objective Scord / PASI                          | 31.11+/-10.96     | 9.54+/-3.49   | -             |
| BMI                                             | 25.07+/-5.1       | 28.65+/-5.69  | 24.16+/-4.22  |
| Age onset <6                                    | 80.77             | 7.14          | -             |
| FLG mutation carriers N (%)                     | 7 (25.93)         | NA            | 1 (2.63)      |
| Asthma/Rhinitis (%)                             | 48.15/62.96       | -/-           | 0/0           |
| Dennie-Morgan lines: weak/moderate/strong (%)   | 37.04/11.11/0     | -/-/-         | 0/0/0         |
| Herthoge's sign: weak/moderate/strong (%)       | 14.81/0/0         | 5.26/0/0      | -/-/-         |
| Palmar hyperlinearity: weak/moderate/strong (%) | 37.04 /22.22/3.7  | -/-/-         | 5.26/0/0      |
| Sebostasis weak/moderate/strong (%)             | 29.63/44.44/22.22 | -/-/-         | 2.63/0/0      |
| Keratosis pilaris weak/moderate/strong          | 37.04/11.11/0     | -/-/-         | 7.89/5.26/0   |
| PsA: questionable/yes (%)                       | -/-               | 28.57/14.29   | -/-           |

**Supplementary Table 2. Sample description. Clinical and molecular features collected for each samples used in the RNA-seq analysis.**

| ID.pheno | Trait | Sex    | Age | FLG Mutation   | Severity (ScorAD/PASI) | Rhinitis | Asthma | PsA | biopsy site non-lesional | biopsy site lesional          | Dennie   | Hertoghe | Palmar hyperlinearity | Xerosis  | Keratosis pilaris |
|----------|-------|--------|-----|----------------|------------------------|----------|--------|-----|--------------------------|-------------------------------|----------|----------|-----------------------|----------|-------------------|
| AD_004   | AD    | female | 48  | no             | 35.5                   | yes      | yes    |     | upper arm flexural right | upper arm flexural left       | moderate | no       | weak                  | moderate | no                |
| AD_005   | AD    | male   | 43  | no             | 44.5                   | yes      | yes    |     | upper arm flexural left  | upper arm flexural right      | no       | no       | moderate              | moderate | weak              |
| AD_006   | AD    | male   | 25  | 2282del4       | 25                     | no       | no     |     | upper arm flexural left  | upper arm flexural right      | weak     | weak     | moderate              | moderate | weak              |
| AD_007   | AD    | male   | 33  | R244X          | 15                     | yes      | no     |     | upper arm flexural left  | antecubital fossa left        | no       | no       | moderate              | weak     | weak              |
| AD_009   | AD    | male   | 45  | 2282del4       | 32                     | yes      | yes    |     | upper arm flexural left  | antecubital fossa left        | no       | no       | moderate              | moderate | weak              |
| AD_011   | AD    | male   | 45  | no             | 36                     | yes      | yes    |     | upper arm flexural left  | upper arm flexural left       | no       | no       | weak                  | weak     | moderate          |
| AD_014   | AD    | male   | 37  | no             | 48                     | yes      | no     |     | upper arm flexural left  | upper arm flexural left       | no       | no       | weak                  | moderate | no                |
| AD_016   | AD    | female | 25  | no             | 18.5                   | no       | no     |     | upper arm flexural left  | upper arm flexural left       | no       | no       | weak                  | moderate | moderate          |
| AD_017   | AD    | female | 42  | no             | 38                     | yes      | yes    |     | upper arm flexural left  | upper arm flexural left       | weak     | no       | moderate              | strong   | weak              |
| AD_019   | AD    | female | 22  | no             | 24.5                   | no       | no     |     | upper arm flexural left  | antecubital fossa left        | no       | no       | no                    | moderate | weak              |
| AD_020   | AD    | female | 43  | no             | 42.5                   | yes      | yes    |     | upper arm flexural right | antecubital fossa             | weak     | no       | weak                  | strong   | weak              |
| AD_021   | AD    | female | 29  | no             | 15                     | no       | no     |     | upper arm flexural left  | antecubital fossa left        | weak     | no       | no                    | weak     | no                |
| AD_023   | AD    | male   | 47  | R244X/2282del4 | 47                     | yes      | yes    |     | upper arm flexural left  | upper arm flexural left       | weak     | weak     | strong                | strong   | weak              |
| AD_024   | AD    | female | 45  | no             | 22.6                   | no       | yes    |     | upper arm flexural right | upper arm flexural right      | no       | no       | weak                  | strong   | weak              |
| AD_025   | AD    | female | 22  | no             | 22.6                   | no       | no     |     | upper arm flexural left  | antecubital fossa left        | weak     | no       | no                    | moderate | no                |
| AD_026   | AD    | male   | 19  | no             | 33.5                   | yes      | yes    |     | upper arm flexural left  | antecubital fossa left        | no       | no       | weak                  | weak     | no                |
| AD_027   | AD    | female | 22  | no             | 14                     | yes      | yes    |     | upper arm flexural left  | upper upper arm flexural left | no       | weak     | no                    | moderate | no                |
| AD_028   | AD    | male   | 31  | no             | 19                     | yes      | yes    |     | upper arm flexural right | upper arm flexural right      | weak     | no       | weak                  | moderate | no                |
| AD_029   | AD    | male   | 21  | no             | 25.7                   | yes      | no     |     | upper arm flexural left  | upper arm flexural left       | moderate | no       | weak                  | no       | no                |
| AD_030   | AD    | female | 23  | no             | 26.5                   | no       | no     |     | upper arm flexural right | antecubital fossa right       | no       | no       | no                    | weak     | no                |
| AD_031   | AD    | male   | 24  | no             | 30.6                   | no       | no     |     | upper arm flexural left  | upper arm flexural left       | weak     | no       | no                    | moderate | moderate          |
| AD_032   | AD    | male   | 53  | 2282del4       | 29                     | no       | no     |     | upper arm flexural left  | antecubital fossa right       | no       | no       | moderate              | moderate | weak              |
| AD_033   | AD    | male   | 48  | no             | 39                     | yes      | yes    |     | upper leg flexural right | upper leg flexural right      | moderate | no       | no                    | strong   | no                |
| AD_034   | AD    | male   | 30  | R501X          | 38                     | yes      | yes    |     | upper arm flexural right | upper arm flexural right      | no       | no       | moderate              | moderate | no                |
| AD_035   | AD    | male   | 19  | no             | 26                     | yes      | no     |     | upper arm flexural left  | lower arm left                | weak     | no       | no                    | weak     | no                |
| AD_036   | AD    | male   | 45  | R501X/2282del4 | 56                     | yes      | no     |     | upper arm flexural left  | upper arm flexural left       | no       | no       | moderate              | strong   | no                |
| AD_037   | AD    | male   | 34  | no             | 36                     | no       | no     |     | upper arm flexural left  | upper arm flexural left       | weak     | weak     | no                    | weak     | no                |
| PSO_001  | PSO   | female | 28  |                | 3.3                    |          |        | yes | upper arm extensor left  | elbow left                    |          |          |                       |          |                   |
| PSO_002  | PSO   | male   | 50  |                | 5                      |          |        | no  | upper arm flexural left  | upper arm flexural left       |          |          |                       |          |                   |
| PSO_003  | PSO   | female | 50  |                | 6.2                    |          |        | yes | upper leg flexural left  | upper leg flexural left       |          |          |                       |          |                   |
| PSO_005  | PSO   | female | 33  |                | 4.3                    |          |        | no  | lower leg flexural right | lower leg flexural right      |          |          |                       |          |                   |

| ID.pheno | Trait | Sex    | Age | FLG Mutation | Severity (ScorAD/P ASI) | Rhinitis | Asthma | PsA     | biopsy site non-lesional | biopsy site lesional     | Dennie | Hertoghe | Palmar hyperlinearity | Xerosis | Keratosis pilaris |
|----------|-------|--------|-----|--------------|-------------------------|----------|--------|---------|--------------------------|--------------------------|--------|----------|-----------------------|---------|-------------------|
| PSO_006  | PSO   | female | 50  |              | 7                       |          |        | no      | lower leg flexural left  | lower leg flexural left  |        |          |                       |         |                   |
| PSO_007  | PSO   | female | 68  |              | 3.8                     |          |        | unknown | upper arm extensor right | upper arm extensor right |        |          |                       |         |                   |
| PSO_008  | PSO   | female | 35  |              | 5                       |          |        | no      | upper arm flexural left  | elbow left               |        |          |                       |         |                   |
| PSO_009  | PSO   | male   | 71  |              | 6.2                     |          |        | yes     | lower leg flexural left  | lower arm flexural left  |        |          |                       |         |                   |
| PSO_011  | PSO   | male   | 53  |              | 8.3                     |          |        | yes     | lower leg extensor left  | lower leg extensor left  |        |          |                       |         |                   |
| PSO_012  | PSO   | female | 46  |              | 5.8                     |          |        | unknown | lower leg extensor left  | lower leg extensor left  |        |          |                       |         |                   |
| PSO_014  | PSO   | male   | 22  |              | 6.8                     |          |        | no      | upper arm extensor left  | upper arm extensor left  |        |          |                       |         |                   |
| PSO_015  | PSO   | male   | 49  |              | 22.4                    |          |        | unknown | upper arm extensor left  | upper arm extensor left  |        |          |                       |         |                   |
| PSO_016  | PSO   | male   | 23  |              | 5.4                     |          |        | no      | upper arm extensor left  | upper arm extensor left  |        |          |                       |         |                   |
| PSO_017  | PSO   | male   | 30  |              | 6.6                     |          |        | no      | lower arm extensor left  | lower arm extensor left  |        |          |                       |         |                   |
| PSO_018  | PSO   | female | 38  |              | 1.8                     |          |        | no      | upper arm extensor left  | upper arm extensor left  |        |          |                       |         |                   |
| PSO_020  | PSO   | female | 21  |              | 2.7                     |          |        | unknown | upper leg flexural left  | upper leg flexural left  |        |          |                       |         |                   |
| PSO_023  | PSO   | female | 36  |              | 1.2                     |          |        | unknown | upper arm extensor left  | elbow left               |        |          |                       |         |                   |
| PSO_024  | PSO   | male   | 69  |              | 2.9                     |          |        | no      | upper arm extensor right | elbow right              |        |          |                       |         |                   |
| PSO_027  | PSO   | male   | 46  |              | 3.6                     |          |        | no      | upper arm flexural left  | elbow left               |        |          |                       |         |                   |
| PSO_028  | PSO   | male   | 41  |              | 9.7                     |          |        | no      | upper arm extensor left  | upper arm extensor left  |        |          |                       |         |                   |
| PSO_029  | PSO   | female | 70  |              | 2                       |          |        | unknown | upper arm extensor right | elbow right              |        |          |                       |         |                   |
| PSO_030  | PSO   | male   | 52  |              | 6.8                     |          |        | no      | upper arm extensor right | elbow right              |        |          |                       |         |                   |
| PSO_031  | PSO   | male   | 40  |              | 11.4                    |          |        | no      | upper arm extensor right | elbow right              |        |          |                       |         |                   |
| PSO_033  | PSO   | female | 28  |              | 4.5                     |          |        | no      | upper arm extensor right | upper arm extensor right |        |          |                       |         |                   |
| PSO_034  | PSO   | male   | 28  |              | 4                       |          |        | unknown | upper arm flexural left  | upper arm flexural left  |        |          |                       |         |                   |
| PSO_035  | PSO   | male   | 24  |              | 1.3                     |          |        | no      | upper arm flexural left  | upper arm flexural left  |        |          |                       |         |                   |
| PSO_036  | PSO   | female | 18  |              | 3.5                     |          |        | no      | upper arm extensor left  | upper arm extensor left  |        |          |                       |         |                   |
| PSO_037  | PSO   | female | 54  |              | 10.5                    |          |        | unknown | upper arm extensor right | upper arm extensor right |        |          |                       |         |                   |
| CTRL_002 | CTRL  | female | 42  | no           |                         |          |        |         | upper arm flexural left  |                          | no     | no       | no                    | no      | no                |
| CTRL_003 | CTRL  | female | 25  | no           |                         |          |        |         | upper arm flexural left  |                          | no     | no       | no                    | no      | no                |
| CTRL_004 | CTRL  | female | 28  | no           |                         |          |        |         | upper arm flexural left  |                          | no     | no       | no                    | no      | no                |
| CTRL_006 | CTRL  | female | 24  | no           |                         |          |        |         | upper arm flexural left  |                          | no     | no       | no                    | no      | no                |
| CTRL_008 | CTRL  | male   | 28  | no           |                         |          |        |         | upper arm flexural right |                          | no     | no       | no                    | no      | weak              |
| CTRL_009 | CTRL  | female | 33  | no           |                         |          |        |         | upper arm flexural left  |                          | no     | no       | no                    | no      | weak              |
| CTRL_010 | CTRL  | female | 27  | no           |                         |          |        |         | upper arm flexural left  |                          | no     | no       | no                    | no      | no                |
| CTRL_011 | CTRL  | male   | 26  | no           |                         |          |        |         | upper arm flexural left  |                          | no     | no       | no                    | no      | moderate          |
| CTRL_013 | CTRL  | male   | 42  | no           |                         |          |        |         | upper arm extensor right |                          | no     | no       | no                    | no      | no                |



| ID.pheno | Trait | Sex    | Age | FLG Mutation | Severity (ScorAD/PAS I) | Rhinitis | Asthma | PsA | biopsy site non-lesional | biopsy site lesional | Dennie | Hertoghe | Palmar hyperlinearity | Xerosis | Keratosis pilaris |
|----------|-------|--------|-----|--------------|-------------------------|----------|--------|-----|--------------------------|----------------------|--------|----------|-----------------------|---------|-------------------|
| CTRL_014 | CTRL  | male   | 24  | no           |                         | no       | no     |     | upper arm flexural left  |                      | no     | no       | no                    | no      | no                |
| CTRL_015 | CTRL  | female | 28  | no           |                         | no       | no     |     | upper arm flexural left  |                      | no     | no       | no                    | no      | no                |
| CTRL_016 | CTRL  | female | 32  | no           |                         | no       | no     |     | upper arm flexural left  |                      | no     | no       | no                    | no      | no                |
| CTRL_017 | CTRL  | male   | 30  | no           |                         | no       | no     |     | upper arm flexural left  |                      | no     | no       | no                    | no      | no                |
| CTRL_018 | CTRL  | male   | 23  | no           |                         | no       | no     |     | upper arm flexural left  |                      | no     | no       | no                    | no      | no                |
| CTRL_019 | CTRL  | female | 40  | no           |                         | no       | no     |     | upper arm extensor left  |                      | no     | no       | weak                  | no      | moderate          |
| CTRL_020 | CTRL  | male   | 26  | no           |                         | no       | no     |     | upper arm flexural left  |                      | no     | no       | no                    | weak    | no                |
| CTRL_022 | CTRL  | male   | 47  | no           |                         | no       | no     |     | upper arm flexural left  |                      | no     | no       | no                    | no      | no                |
| CTRL_024 | CTRL  | female | 47  | no           |                         | no       | no     |     | upper arm flexural left  |                      | no     | no       | no                    | no      | no                |
| CTRL_025 | CTRL  | female | 25  | no           |                         | no       | no     |     | upper arm flexural left  |                      | no     | weak     | no                    | no      | no                |
| CTRL_026 | CTRL  | female | 31  | no           |                         | no       | no     |     | upper arm flexural left  |                      | no     | weak     | no                    | no      | no                |
| CTRL_029 | CTRL  | male   | 40  | no           |                         | no       | no     |     | upper arm flexural left  |                      | no     | no       | no                    | no      | no                |
| CTRL_030 | CTRL  | male   | 40  | no           |                         | no       | no     |     | upper arm flexural left  |                      | no     | no       | no                    | no      | no                |
| CTRL_031 | CTRL  | male   | 54  | no           |                         | no       | no     |     | upper arm flexural left  |                      | no     | no       | no                    | no      | no                |
| CTRL_032 | CTRL  | male   | 37  | no           |                         | no       | no     |     | upper arm flexural right |                      | no     | no       | no                    | no      | no                |
| CTRL_033 | CTRL  | female | 52  | no           |                         | no       | no     |     | upper arm extensor left  |                      | no     | no       | no                    | no      | no                |
| CTRL_034 | CTRL  | male   | 61  | no           |                         | no       | no     |     | upper arm flexural left  |                      | no     | no       | no                    | no      | no                |
| CTRL_035 | CTRL  | female | 29  | no           |                         | no       | no     |     | upper arm flexural left  |                      | no     | no       | no                    | no      | no                |
| CTRL_036 | CTRL  | female | 25  | no           |                         | no       | no     |     | upper arm flexural left  |                      | no     | no       | no                    | no      | no                |
| CTRL_037 | CTRL  | male   | 22  | no           |                         | no       | no     |     | upper arm flexural left  |                      | no     | no       | no                    | no      | weak              |
| CTRL_038 | CTRL  | female | 20  | no           |                         | no       | no     |     | upper arm flexural left  |                      | no     | no       | no                    | no      | no                |
| CTRL_039 | CTRL  | female | 19  | no           |                         | no       | no     |     | upper arm extensor left  |                      | no     | no       | weak                  | no      | no                |
| CTRL_040 | CTRL  | female | 20  | no           |                         | no       | no     |     | upper arm flexural left  |                      | no     | no       | no                    | no      | no                |
| CTRL_041 | CTRL  | female | 57  | no           |                         | no       | no     |     | upper arm extensor right |                      | no     | no       | no                    | no      | no                |
| CTRL_042 | CTRL  | female | 20  | 2282del4     |                         | no       | no     |     | upper arm flexural left  |                      | no     | no       | no                    | no      | no                |
| CTRL_043 | CTRL  | female | 24  | no           |                         | no       | no     |     | upper arm flexural left  |                      | no     | no       | no                    | no      | no                |
| CTRL_044 | CTRL  | male   | 18  | no           |                         | no       | no     |     | upper arm flexural right |                      | no     | no       | no                    | no      | no                |
| CTRL_045 | CTRL  | female | 25  | no           |                         | no       | no     |     | upper arm flexural right |                      | no     | no       | no                    | no      | no                |
| CTRL_046 | CTRL  | male   | 49  | no           |                         | no       | no     |     | upper arm flexural left  |                      | no     | no       | no                    | no      | no                |

**Supplementary Table 3. Transcriptomic studies conducted for AD/Eczema.** Only show the number of samples that have been profiled for transcriptome, remained after quality control, and presented in the paper (if the number cannot be determined in the paper, the number of samples deposited in the corresponding GEO was used). ^same control individuals; \*same patients; #the study used skin tape strip for profiling the transcriptome.

| Study                                           | Platform                        | Study treatment response         | Control      | Pso uninvolved | Pso lesional                           | AD/Eczema uninvolved | AD/Eczema lesional                     |
|-------------------------------------------------|---------------------------------|----------------------------------|--------------|----------------|----------------------------------------|----------------------|----------------------------------------|
| Nomura I, et al. 2003. <i>JACI</i>              | Microarray                      | NA                               | NA           | NA             | 6                                      | NA                   | 7                                      |
| Guttman-Yassky E et al. 2009. <i>JACI</i>       | Microarray                      | NA                               | 9^           | NA             | 15                                     | NA                   | 9                                      |
| Suarez-Farinas Mayte, et al. 2011. <i>JACI</i>  | Microarray                      | NA                               | 8            | NA             | NA                                     | 12                   | 13                                     |
| Tintle S, et al. 2011. <i>JACI</i>              | Microarray                      | UVB phototherapy                 | NA           | NA             | NA                                     | 12                   | 12                                     |
| Choy DF et al. 2012. <i>JACI</i>                | Microarray                      | NA                               | 5            | NA             | 14                                     | NA                   | 12                                     |
| Gittler JK et al. 2012. <i>JACI</i>             | Microarray                      | NA                               | 15^          | NA             | NA                                     | 8                    | 8 chronic/8 acute                      |
| Cole C et al. 2014. <i>JACI</i>                 | <b>RNA-Seq</b>                  | NA                               | 10           | NA             | NA                                     | 26                   | NA                                     |
| Quaranta M et al. 2014. <i>Sci Trans Med</i>    | Microarray                      | NA                               | NA           | NA             | 24 psoriatic patients also with eczema | NA                   | 24 eczema patients also with psoriasis |
| Rodriguez E, et al. 2014. <i>JID</i>            | Microarray                      | NA                               | 14 epidermal | NA             | NA                                     | 7 epidermal          | 12 epidermal                           |
| Khattari S, et al. 2014. <i>JACI</i>            | Microarray                      | Cyclosporine                     | NA           | NA             | NA                                     | 19*                  | 19*                                    |
| Beck LA, et al. 2014. <i>NEJM</i>               | microarray                      | dupilumab                        | NA           | NA             | NA                                     | 7                    | 16                                     |
| Suarez-Farinas M, et al. 2015. <i>JACI</i>      | <b>Microarray &amp; RNA-seq</b> | NA                               | NA           | NA             | NA                                     | 18*                  | 18*                                    |
| Brunner, PM, et al. 2016. <i>JACI</i>           | Microarray                      | Topical glucocorticosteroids     | NA           | NA             | NA                                     | 9                    | 14                                     |
| Malik K. et al. 2017. <i>Clin Exp Allergy</i>   | Microarray                      | House dust mite atopy patch test | 14           | NA             | NA                                     | 8                    | 8                                      |
| Dyjack N, et al. 2018. <i>JACI</i> <sup>#</sup> | RNA-seq                         | NA                               | 13           | NA             | NA                                     | 18                   | 12                                     |
| <b>This study</b>                               | <b>RNA-seq</b>                  | NA                               | 38           | 27             | 28                                     | 27                   | 27                                     |

**Supplementary Table 4. Number of differentially expressed genes in each of the comparisons.**

| DE analysis                         | Number of Genes |              |                |
|-------------------------------------|-----------------|--------------|----------------|
|                                     | DEGs            | Up-regulated | Down-regulated |
| Healthy vs Pso non-lesional         | 246             | 82           | 164            |
| Healthy vs Pso lesional             | 6763            | 2502         | 4261           |
| Pso non-lesional vs Pso lesional    | 5156            | 2232         | 2924           |
| Healthy vs AD non-lesional          | 180             | 98           | 82             |
| Healthy vs AD lesional              | 3450            | 1529         | 1921           |
| AD non-lesional vs AD lesional      | 1785            | 919          | 866            |
| Pso non-lesional vs AD non-lesional | 185             | 117          | 68             |
| Pso lesional vs AD lesional         | 2030            | 1259         | 771            |

**Supplementary Table 5. Functional enrichment results for lesional DEGs In Excel Table**

**Supplementary Table 6. Functional enrichment results for uninvolved DEGs In Excel Table**

**Supplementary Table 7. Read counts obtained for IL4 and IL13 for all samples**

**Supplementary Table 8. Cell type enrichment analysis for different differential expression analysis**

**Supplementary Table 9. Proportion of CD8 cells obtained from the quantitative immunochemistry results.**

**Supplementary Table 10. Table for top features in classification.**

|                             | Ranking of selected features | Selected features |
|-----------------------------|------------------------------|-------------------|
| <b>Normal vs uninvolved</b> |                              |                   |
| <b>AD</b>                   | 1                            | <i>IL13</i>       |
|                             | 2                            | <i>EBI3</i>       |
|                             | 3                            | <i>IL26</i>       |
|                             | 4                            | <i>IL20</i>       |
|                             | 5                            | <i>IL5</i>        |
|                             | 6                            | <i>IL36A</i>      |
|                             | 7                            | <i>IL36G</i>      |
| <b>Normal vs uninvolved</b> |                              |                   |
| <b>Pso</b>                  | 1                            | <i>IL36G</i>      |
|                             | 2                            | <i>IL19</i>       |
|                             | 3                            | <i>IL18</i>       |
|                             | 4                            | <i>IL36A</i>      |
|                             | 5                            | <i>EBI3</i>       |
|                             | 6                            | <i>IL13</i>       |

**Supplementary Table 11. Spearman correlation and significance level between gene expression and severity score in psoriatic lesional (PASI) and AD lesional (SCORAD) skin.**

**Supplementary Table 12. Current AD drugs (from the drug databases used in this study) whose targets are differentially expressed in AD lesioanl skin.**

## References

- Anders S, Pyl PT, Huber W. HTSeq--a Python framework to work with high-throughput sequencing data. *Bioinformatics* 2015;31(2):166-9.
- Andrews S. FastQC: a quality control tool for high throughput sequence data., <http://www.bioinformatics.babraham.ac.uk/projects/fastqc>; 2010 [accessed].
- Ashburner M, Ball CA, Blake JA, Botstein D, Butler H, Cherry JM, et al. Gene ontology: tool for the unification of biology. The Gene Ontology Consortium. *Nature genetics* 2000;25(1):25-9.
- Bindea G, Mlecnik B, Hackl H, Charoentong P, Tosolini M, Kirilovsky A, et al. ClueGO: a Cytoscape plug-in to decipher functionally grouped gene ontology and pathway annotation networks. *Bioinformatics* 2009;25(8):1091-3.
- Bischl B, Lang M, Kotthoff L, Schiffner J, Richter J, Studerus E, et al. mlr: Machine Learning in R. *Journal of Machine Learning Research* 2016;17(170):1-5.
- Boehncke WH, Schon MP. Psoriasis. *Lancet* 2015;386(9997):983-94.
- Carter JS, Brown SH, Erlbaum MS, Gregg W, Elkin PL, Speroff T, et al. Initializing the VA medication reference terminology using UMLS metathesaurus co-occurrences. *Proc AMIA Symp* 2002:116-20.
- Davis AP, Grondin CJ, Johnson RJ, Sciaky D, King BL, McMorran R, et al. The Comparative Toxicogenomics Database: update 2017. *Nucleic Acids Res* 2016.
- Dobin A, Davis CA, Schlesinger F, Drenkow J, Zaleski C, Jha S, et al. STAR: ultrafast universal RNA-seq aligner. *Bioinformatics* 2013;29(1):15-21.
- Farh KK, Marson A, Zhu J, Kleinewietfeld M, Housley WJ, Beik S, et al. Genetic and epigenetic fine mapping of causal autoimmune disease variants. *Nature* 2015;518(7539):337-43.
- Guo Y, Zhao S, Li CI, Sheng Q, Shyr Y. RNAseqPS: A Web Tool for Estimating Sample Size and Power for RNAseq Experiment. *Cancer Inform* 2014;13(Suppl 6):1-5.
- Hewett M, Oliver DE, Rubin DL, Easton KL, Stuart JM, Altman RB, et al. PharmGKB: the Pharmacogenetics Knowledge Base. *Nucleic Acids Res* 2002;30(1):163-5.
- Kanehisa M, Goto S, Sato Y, Furumichi M, Tanabe M. KEGG for integration and interpretation of large-scale molecular data sets. *Nucleic Acids Res* 2012;40(Database issue):D109-14.
- Law CW, Chen Y, Shi W, Smyth GK. voom: Precision weights unlock linear model analysis tools for RNA-seq read counts. *Genome Biol* 2014;15(2):R29.
- Law V, Knox C, Djoumbou Y, Jewison T, Guo AC, Liu Y, et al. DrugBank 4.0: shedding new light on drug metabolism. *Nucleic Acids Res* 2014;42(Database issue):D1091-7.
- Nishimura D. Biocarta. *Biotech Software & Internet Report* 2001;2(3):117-20.
- Raja K, Patrick M, Elder JT, Tsoi LC. Machine learning workflow to enhance predictions of Adverse Drug Reactions (ADRs) through drug-gene interactions: application to drugs for cutaneous diseases. *Sci Rep* 2017;7(1):3690.
- Ritchie ME, Phipson B, Wu D, Hu Y, Law CW, Shi W, et al. limma powers differential expression analyses for RNA-sequencing and microarray studies. *Nucleic Acids Res* 2015;43(7):e47.
- Robinson MD, Oshlack A. A scaling normalization method for differential expression analysis of RNA-seq data. *Genome Biol* 2010;11(3):R25.

Sarkar MK, Hile GA, Tsoi LC, Xing X, Liu J, Liang Y, et al. Photosensitivity and type I IFN responses in cutaneous lupus are driven by epidermal-derived interferon kappa. *Ann Rheum Dis* 2018.

Weidinger S, Novak N. Atopic dermatitis. *Lancet* 2015.
