# Supplementary material
Source: PubMed Central journal article supplement (PMC6711380)
Supplement: NIHMS1044514-supplement-Supple_Table_06.pdf [file NIHMS1044514-supplement-Supple_Table_06.pdf]

|                                    | NumFunGenes | Gs_Pso_uninvolved | DEGs_Pso_uninvolved_p | DEGs_Pso_uninvolved_FDR | DEGs_Pso_uninvolved_FC | DEGs_Pso_uninvolved_gcr     | DEGs_AD_uninvolved_x | DEGs_AD_uninvolved_p | DEGs_AD_uninvolved_FDR | DEGs_AD_uninvolved_F | DEGs_AD_uninvolved_genes           |
|------------------------------------|-------------|-------------------|-----------------------|-------------------------|------------------------|-----------------------------|----------------------|----------------------|------------------------|----------------------|------------------------------------|
| CARTILAGE_DEVELOPMENT_INVOLVED     | 18          | 2                 | 1.72E-03              | 8.50E-02                | 22.97                  | COL1A1; COMP                | 1                    | 5.29E-02             | 3.37E-01               | 9.44                 | COMP                               |
| CELLULAR_ZINC_ION_HOMEOSTASIS      | 12          | 2                 | 7.50E-04              | 5.59E-02                | 34.45                  | S100A8; S100A9              | 2                    | 1.11E-03             | 6.25E-02               | 28.33                | S100A8; S100A9                     |
| CHRONIC_INFLAMMATORY_RESPONSE      | 12          | 2                 | 7.50E-04              | 5.59E-02                | 34.45                  | S100A8; S100A9              | 2                    | 1.11E-03             | 6.25E-02               | 28.33                | S100A8; S100A9                     |
| CORNIFIED_ENVELOPE                 | 22          | 6                 | 3.69E-10              | 1.46E-07                | 56.38                  | SPRR2A; SPRR2B; SPRR2D; :   | 6                    | 1.23E-09             | 4.85E-07               | 46.35                | SPRR2A; SPRR2B; SPRR2D; SPRR2      |
| CYTOKINE_ACTIVITY                  | 168         | 5                 | 7.38E-04              | 5.59E-02                | 6.15                   | BMP3; CCL4; IL19; IL36A; IL | 8                    | 3.54E-06             | 7.99E-04               | 8.09                 | BMP3; CCL13; CCL18; CCL8; CXCL     |
| CYTOKINE_PRODUCTION                | 90          | 4                 | 5.08E-04              | 5.35E-02                | 9.19                   | AIM2; S100A12; S100A8; S1   | 2                    | 5.72E-02             | 3.39E-01               | 3.78                 | S100A8; S100A9                     |
| DEFENSE_RESPONSE_TO_BACTERIUM      | 97          | 5                 | 5.63E-05              | 9.88E-03                | 10.66                  | DEFB4A; S100A12; S100A7;    | 4                    | 1.41E-03             | 7.20E-02               | 7.01                 | DEFB4A; S100A7; S100A8; S100A      |
| DEFENSE_RESPONSE_TO_FUNGUS         | 11          | 3                 | 8.80E-06              | 1.74E-03                | 56.38                  | S100A12; S100A8; S100A9     | 2                    | 9.25E-04             | 5.85E-02               | 30.90                | S100A8; S100A9                     |
| DISRUPTION_OF_CELLS_OF_OTHER_OR    | 11          | 2                 | 6.26E-04              | 5.59E-02                | 37.58                  | APOL1; S100A12              | 0                    | 5.31E-01             | 7.69E-01               | 0.00                 |                                    |
| EPIDERMAL_CELL_DIFFERENTIATION     | 102         | 10                | 2.89E-11              | 1.52E-08                | 20.27                  | LCE3A; LCE3D; LCE3E; S100   | 10                   | 2.13E-10             | 1.12E-07               | 16.66                | LCE3A; LCE3D; LCE3E; S100A7; S1    |
| EPIDERMIS_DEVELOPMENT              | 245         | 11                | 1.32E-08              | 4.17E-06                | 9.28                   | COL1A1; LCE3A; LCE3D; LCI   | 11                   | 1.07E-07             | 2.82E-05               | 7.63                 | KRT16; LCE3A; LCE3D; LCE3E; S1I    |
| EPITHELIAL_CELL_DIFFERENTIATION    | 242         | 10                | 1.31E-07              | 3.46E-05                | 8.54                   | LCE3A; LCE3D; LCE3E; S100   | 11                   | 9.43E-08             | 2.82E-05               | 7.73                 | ERBB4; LCE3A; LCE3D; LCE3E; S1I    |
| INTERLEUKIN_1_RECEPTOR_BINDING     | 16          | 2                 | 1.35E-03              | 7.38E-02                | 25.84                  | IL36A; IL36G                | 0                    | 5.45E-01             | 7.69E-01               | 0.00                 |                                    |
| KERATINIZATION                     | 44          | 9                 | 2.76E-13              | 4.36E-10                | 42.28                  | LCE3A; LCE3D; LCE3E; SPRR   | 9                    | 1.71E-12             | 2.70E-09               | 34.77                | LCE3A; LCE3D; LCE3E; SPRR2A; S1    |
| KERATINOCYTE_DIFFERENTIATION       | 87          | 10                | 5.72E-12              | 4.52E-09                | 23.76                  | LCE3A; LCE3D; LCE3E; S100   | 10                   | 4.26E-11             | 3.37E-08               | 19.54                | LCE3A; LCE3D; LCE3E; S100A7; S1    |
| KILLING_OF_CELLS_OF_OTHER_ORGANI   | 11          | 2                 | 6.26E-04              | 5.59E-02                | 37.58                  | APOL1; S100A12              | 0                    | 5.31E-01             | 7.69E-01               | 0.00                 |                                    |
| LONG_CHAIN_FATTY_ACID_BINDING      | 12          | 2                 | 7.50E-04              | 5.59E-02                | 34.45                  | S100A8; S100A9              | 2                    | 1.11E-03             | 6.25E-02               | 28.33                | S100A8; S100A9                     |
| MAINTENANCE_OF_LOCATION            | 121         | 4                 | 1.55E-03              | 7.89E-02                | 6.83                   | S100A7; S100A8; S100A9; S   | 3                    | 2.01E-02             | 3.30E-01               | 4.21                 | S100A8; S100A9                     |
| MODIFICATION_OF_MORPHOLOGY_OR      | 48          | 3                 | 8.46E-04              | 5.59E-02                | 12.92                  | APOL1; CCL4; S100A12        | 1                    | 1.40E-01             | 4.25E-01               | 3.54                 | HMGA2                              |
| NEUTROPHIL_CHEMOTAXIS              | 36          | 3                 | 3.59E-04              | 4.24E-02                | 17.23                  | S100A12; S100A8; S100A9     | 3                    | 6.40E-04             | 5.83E-02               | 14.16                | EDN2; S100A8; S100A9               |
| POSITIVE_REGULATION_OF_CYSSTEINE_1 | 111         | 4                 | 1.12E-03              | 6.82E-02                | 7.45                   | AIM2; IFI27; S100A8; S100A  | 3                    | 1.59E-02             | 3.20E-01               | 4.59                 | IFI27; S100A8; S100A9              |
| POSITIVE_REGULATION_OF_ENDOPEPTI   | 116         | 4                 | 1.32E-03              | 7.38E-02                | 7.13                   | AIM2; IFI27; S100A8; S100A  | 3                    | 1.79E-02             | 3.20E-01               | 4.60                 | IFI27; S100A8; S100A9              |
| POSITIVE_REGULATION_OF_LYMPHOCT    | 16          | 2                 | 1.35E-03              | 7.38E-02                | 25.84                  | CCL4; S100A7                | 1                    | 4.70E-02             | 3.37E-01               | 10.42                | S100A7                             |
| POSITIVE_REGULATION_OF_NF_KAPPAI   | 104         | 4                 | 8.78E-04              | 5.59E-02                | 7.95                   | AIM2; S100A12; S100A8; S1   | 2                    | 7.42E-02             | 3.55E-01               | 3.27                 | S100A8; S100A9                     |
| POSITIVE_REGULATION_OF_PEPTIDASE   | 120         | 4                 | 1.50E-03              | 7.89E-02                | 6.89                   | AIM2; IFI27; S100A8; S100A  | 3                    | 1.96E-02             | 3.26E-01               | 4.25                 | IFI27; S100A8; S100A9              |
| POSITIVE_REGULATION_OF_RESPONSE    | 145         | 5                 | 3.76E-04              | 4.24E-02                | 7.13                   | CCL4; S100A12; S100A7; S1   | 4                    | 6.10E-03             | 1.90E-01               | 4.69                 | EDN2; S100A7; S100A8; S100A9       |
| REGULATION_OF_ENDOPEPTIDASE_ACT    | 238         | 7                 | 8.45E-05              | 1.21E-02                | 6.08                   | AIM2; IFI27; PI3; S100A8; S | 7                    | 2.92E-04             | 3.48E-02               | 5.00                 | BIRC3; IFI27; S100A8; S100A9; SE   |
| REGULATION_OF_LYMPHOCTE_CHEMI      | 13          | 2                 | 8.85E-04              | 5.59E-02                | 31.80                  | CCL4; S100A7                | 1                    | 3.82E-02             | 3.37E-01               | 13.07                | S100A7                             |
| REGULATION_OF_PEPTIDASE_ACTIVITY   | 245         | 7                 | 1.01E-04              | 1.33E-02                | 5.91                   | AIM2; IFI27; PI3; S100A8; S | 7                    | 3.48E-04             | 3.67E-02               | 4.86                 | BIRC3; IFI27; S100A8; S100A9; SE   |
| RESPONSE_TO_FUNGUS                 | 21          | 3                 | 6.93E-05              | 1.09E-02                | 29.53                  | S100A12; S100A8; S100A9     | 2                    | 3.46E-03             | 1.48E-01               | 16.19                | S100A8; S100A9                     |
| SEQUESTERING_OF_METAL_ION          | 11          | 3                 | 8.80E-06              | 1.74E-03                | 56.38                  | S100A7; S100A8; S100A9      | 3                    | 1.59E-05             | 3.14E-03               | 46.35                | S100A7; S100A8; S100A9             |
| ZINC_ION_HOMEOSTASIS               | 13          | 2                 | 8.85E-04              | 5.59E-02                | 31.80                  | S100A8; S100A9              | 2                    | 1.31E-03             | 6.88E-02               | 26.15                | S100A8; S100A9                     |
| CELL_CHEMOTAXIS                    | 103         | 3                 | 7.58E-03              | 1.98E-01                | 6.02                   | S100A12; S100A8; S100A9     | 4                    | 1.77E-03             | 8.72E-02               | 6.60                 | CCL13; EDN2; S100A8; S100A9        |
| CELLULAR_ZINC_ION_HOMEOSTASIS      | 12          | 2                 | 7.50E-04              | 5.59E-02                | 34.45                  | S100A8; S100A9              | 2                    | 1.11E-03             | 6.25E-02               | 28.33                | S100A8; S100A9                     |
| CHEMOKINE_ACTIVITY                 | 39          | 1                 | 9.39E-02              | 3.72E-01                | 5.30                   | CCL4                        | 4                    | 4.09E-05             | 7.18E-03               | 17.43                | CCL13; CCL18; CCL8; CXCL6          |
| CHEMOKINE_RECEPTOR_BINDING         | 46          | 1                 | 1.11E-01              | 4.03E-01                | 4.49                   | CCL4                        | 4                    | 7.93E-05             | 1.24E-02               | 14.78                | CCL13; CCL18; CCL8; CXCL6          |
| CHRONIC_INFLAMMATORY_RESPONSE      | 12          | 2                 | 7.50E-04              | 5.59E-02                | 34.45                  | S100A8; S100A9              | 2                    | 1.11E-03             | 6.25E-02               | 28.33                | S100A8; S100A9                     |
| CORNIFIED_ENVELOPE                 | 22          | 6                 | 3.69E-10              | 1.46E-07                | 56.38                  | SPRR2A; SPRR2B; SPRR2D; :   | 6                    | 1.23E-09             | 4.85E-07               | 46.35                | SPRR2A; SPRR2B; SPRR2D; SPRR2      |
| CYTOKINE_ACTIVITY                  | 168         | 5                 | 7.38E-04              | 5.59E-02                | 6.15                   | BMP3; CCL4; IL19; IL36A; IL | 8                    | 3.54E-06             | 7.99E-04               | 8.09                 | BMP3; CCL13; CCL18; CCL8; CXCL     |
| CYTOKINE_CYTOKINE_RECEPTOR_INTER   | 229         | 2                 | 2.02E-01              | 5.27E-01                | 1.81                   | IL19; CCL4                  | 7                    | 2.30E-04             | 3.03E-02               | 5.20                 | IL13; IL20; IL26; CCL8; CCL13; CCI |
| CYTOKINE_RECEPTOR_BINDING          | 182         | 3                 | 3.49E-02              | 3.11E-01                | 3.41                   | CCL4; IL36A; IL36G          | 6                    | 4.05E-04             | 3.99E-02               | 5.60                 | CCL13; CCL18; CCL8; CXCL6; IL13    |
| DEFENSE_RESPONSE_TO_BACTERIUM      | 97          | 5                 | 5.63E-05              | 9.88E-03                | 10.66                  | DEFB4A; S100A12; S100A7;    | 4                    | 1.41E-03             | 7.20E-02               | 7.01                 | DEFB4A; S100A7; S100A8; S100A      |
| DEFENSE_RESPONSE_TO_FUNGUS         | 11          | 3                 | 8.80E-06              | 1.74E-03                | 56.38                  | S100A12; S100A8; S100A9     | 2                    | 9.25E-04             | 5.85E-02               | 30.90                | S100A8; S100A9                     |
| DORSAL_SPINAL_CORD_DEVELOPMENT     | 11          | 0                 | 5.26E-01              | 8.01E-01                | 0.00                   |                             | 2                    | 9.25E-04             | 5.85E-02               | 30.90                | DRGX; GSK2                         |
| EPIDERMAL_CELL_DIFFERENTIATION     | 102         | 10                | 2.89E-11              | 1.52E-08                | 20.27                  | LCE3A; LCE3D; LCE3E; S100   | 10                   | 2.13E-10             | 1.12E-07               | 16.66                | LCE3A; LCE3D; LCE3E; S100A7; S1    |
| EPIDERMIS_DEVELOPMENT              | 245         | 11                | 1.32E-08              | 4.17E-06                | 9.28                   | COL1A1; LCE3A; LCE3D; LCI   | 11                   | 1.07E-07             | 2.82E-05               | 7.63                 | KRT16; LCE3A; LCE3D; LCE3E; S1I    |
| EPITHELIAL_CELL_DIFFERENTIATION    | 242         | 10                | 1.31E-07              | 3.46E-05                | 8.54                   | LCE3A; LCE3D; LCE3E; S100   | 11                   | 9.43E-08             | 2.82E-05               | 7.73                 | ERBB4; LCE3A; LCE3D; LCE3E; S1I    |
| KERATINIZATION                     | 44          | 9                 | 2.76E-13              | 4.36E-10                | 42.28                  | LCE3A; LCE3D; LCE3E; SPRR   | 9                    | 1.71E-12             | 2.70E-09               | 34.77                | LCE3A; LCE3D; LCE3E; SPRR2A; S1    |
| KERATINOCYTE_DIFFERENTIATION       | 87          | 10                | 5.72E-12              | 4.52E-09                | 23.76                  | LCE3A; LCE3D; LCE3E; S100   | 10                   | 4.26E-11             | 3.37E-08               | 19.54                | LCE3A; LCE3D; LCE3E; S100A7; S1    |
| LEUKOCYTE_CHEMOTAXIS               | 82          | 3                 | 3.99E-03              | 1.54E-01                | 7.56                   | S100A12; S100A8; S100A9     | 4                    | 7.51E-04             | 5.83E-02               | 8.29                 | CCL13; EDN2; S100A8; S100A9        |
| LONG_CHAIN_FATTY_ACID_BINDING      | 12          | 2                 | 7.50E-04              | 5.59E-02                | 34.45                  | S100A8; S100A9              | 2                    | 1.11E-03             | 6.25E-02               | 28.33                | S100A8; S100A9                     |
| NEUTROPHIL_CHEMOTAXIS              | 36          | 3                 | 3.59E-04              | 4.24E-02                | 17.23                  | S100A12; S100A8; S100A9     | 3                    | 6.40E-04             | 5.83E-02               | 14.16                | EDN2; S100A8; S100A9               |
| OLFACTORY_BULB_INTERNEURON_DIFF    | 11          | 0                 | 5.26E-01              | 8.01E-01                | 0.00                   |                             | 2                    | 9.25E-04             | 5.85E-02               | 30.90                | ERBB4; GSK2                        |
| POSITIVE_REGULATION_OF_ERK1_AND    | 80          | 2                 | 3.21E-02              | 3.10E-01                | 5.17                   | DCC; S100A7                 | 4                    | 6.84E-04             | 5.83E-02               | 8.50                 | ERBB4; GPR55; IL26; S100A7         |
| POSITIVE_REGULATION_OF_JAK_STAT_1  | 47          | 0                 | 6.02E-01              | 8.01E-01                | 0.00                   |                             | 4                    | 8.63E-05             | 1.24E-02               | 14.47                | ERBB4; IL13; IL20; IL26            |
| POSITIVE_REGULATION_OF_TYROSINE_   | 39          | 0                 | 5.86E-01              | 8.01E-01                | 0.00                   |                             | 4                    | 8.11E-04             | 5.83E-02               | 13.07                | ERBB4; IL13; IL20                  |
| REGULATION_OF_ENDOPEPTIDASE_ACT    | 238         | 7                 | 8.45E-05              | 1.21E-02                | 6.08                   | AIM2; IFI27; PI3; S100A8; S | 7                    | 2.92E-04             | 3.48E-02               | 5.00                 | BIRC3; IFI27; S100A8; S100A9; SE   |
| REGULATION_OF_JAK_STAT_CASCADE     | 65          | 0                 | 6.35E-01              | 8.01E-01                | 0.00                   |                             | 4                    | 3.08E-04             | 3.48E-02               | 10.46                | ERBB4; IL13; IL20; IL26            |
| REGULATION_OF_PEPTIDASE_ACTIVITY   | 245         | 7                 | 1.01E-04              | 1.33E-02                | 5.91                   | AIM2; IFI27; PI3; S100A8; S | 7                    | 3.48E-04             | 3.67E-02               | 4.86                 | ERBB4; IL13; IL20; IL26            |
| REGULATION_OF_TYROSINE_PHOSPHOI    | 45          | 0                 | 5.98E-01              | 8.01E-01                | 0.00                   |                             | 3                    | 1.24E-03             | 6.75E-02               | 11.33                | ERBB4; IL13; IL20                  |
| RESPONSE_TO_ETHANOL                | 83          | 2                 | 3.43E-02              | 3.10E-01                | 4.98                   | S100A8; S100A9              | 4                    | 7.86E-04             | 5.83E-02               | 8.19                 | ADH6; IL13; S100A8; S100A9         |
| SEQUESTERING_OF_METAL_ION          | 11          | 3                 | 8.80E-06              | 1.74E-03                | 56.38                  | S100A7; S100A8; S100A9      | 3                    | 1.59E-05             | 3.14E-03               | 46.35                | S100A7; S100A8; S100A9             |
| SERINE_TYPE_ENDOPEPTIDASE_INHIBIT  | 82          | 3                 | 3.99E-03              | 1.54E-01                | 7.56                   | PI3; SERPINB3; SERPINB4     | 4                    | 7.51E-04             | 5.83E-02               | 8.29                 | SERPINB11; SERPINB4; SPINK1; V     |
| ZINC_ION_HOMEOSTASIS               | 13          | 2                 | 8.85E-04              | 5.59E-02                | 31.80                  | S100A8; S100A9              | 2                    | 1.31E-03             | 6.88E-02               | 26.15                | S100A8; S100A9                     |

E; SPRR2F; SPRR2G  
.6; IL13; IL20; IL26

9

^RR2A; SPRR2B; SPRR2D; SPRR2E; SPRR2F; SPRR2G  
^AA7; SPRR2A; SPRR2B; SPRR2D; SPRR2E; SPRR2F; SPRR2G  
^AA7; SPRR2A; SPRR2B; SPRR2D; SPRR2E; SPRR2F; SPRR2G

^RR2B; SPRR2D; SPRR2E; SPRR2F; SPRR2G  
^RR2A; SPRR2B; SPRR2D; SPRR2E; SPRR2F; SPRR2G

RPINB11; SERPINB4; SPINK1

RPINB11; SERPINB4; SPINK1

E; SPRR2F; SPRR2G  
.6; IL13; IL20; IL26

.18; CXCL6  
; IL20  
9

^RR2A; SPRR2B; SPRR2D; SPRR2E; SPRR2F; SPRR2G  
^AA7; SPRR2A; SPRR2B; SPRR2D; SPRR2E; SPRR2F; SPRR2G  
^AA7; SPRR2A; SPRR2B; SPRR2D; SPRR2E; SPRR2F; SPRR2G  
^RR2B; SPRR2D; SPRR2E; SPRR2F; SPRR2G  
^RR2A; SPRR2B; SPRR2D; SPRR2E; SPRR2F; SPRR2G

RPINB11; SERPINB4; SPINK1

RPINB11; SERPINB4; SPINK1

^FIKKN2
