# Supplementary material
Source: PubMed Central journal article supplement (PMC6711380)
Supplement: NIHMS1044514-supplement-Supple_Table_07.pdf [file NIHMS1044514-supplement-Supple_Table_07.pdf]

| <b>SampleIDs</b> | <b>Phenotype</b> | <b>IL4</b> | <b>IL13</b> |
|------------------|------------------|------------|-------------|
| 2013_004L        | AD_lesional      | 0          | 24          |
| 2013_004NL       | AD_non-lesional  | 0          | 4           |
| 2013_005L        | AD_lesional      | 0          | 53          |
| 2013_005NL       | AD_non-lesional  | 0          | 4           |
| 2013_006L        | AD_lesional      | 0          | 15          |
| 2013_006NL       | AD_non-lesional  | 0          | 7           |
| 2013_007L        | AD_lesional      | 1          | 7           |
| 2013_007NL       | AD_non-lesional  | 3          | 4           |
| 2013_009L        | AD_lesional      | 1          | 38          |
| 2013_009NL       | AD_non-lesional  | 1          | 4           |
| 2013_011L        | AD_lesional      | 0          | 3           |
| 2013_011NL       | AD_non-lesional  | 0          | 0           |
| 2013_014L        | AD_lesional      | 0          | 16          |
| 2013_014NL       | AD_non-lesional  | 0          | 7           |
| 2013_016L        | AD_lesional      | 3          | 60          |
| 2013_016NL       | AD_non-lesional  | 0          | 1           |
| 2013_017L        | AD_lesional      | 2          | 18          |
| 2013_017NL       | AD_non-lesional  | 0          | 4           |
| 2013_019L        | AD_lesional      | 0          | 1           |
| 2013_019NL       | AD_non-lesional  | 0          | 2           |
| 2013_020L        | AD_lesional      | 0          | 37          |
| 2013_020NL       | AD_non-lesional  | 0          | 35          |
| 2013_021L        | AD_lesional      | 1          | 5           |
| 2013_021NL       | AD_non-lesional  | 1          | 0           |
| 2013_023L        | AD_lesional      | 10         | 27          |
| 2013_023NL       | AD_non-lesional  | 4          | 33          |
| 2013_024L        | AD_lesional      | 1          | 19          |
| 2013_024NL       | AD_non-lesional  | 1          | 8           |
| 2013_025L        | AD_lesional      | 0          | 7           |
| 2013_025NL       | AD_non-lesional  | 1          | 1           |
| 2013_026L        | AD_lesional      | 1          | 26          |
| 2013_026NL       | AD_non-lesional  | 0          | 6           |
| 2013_027L        | AD_lesional      | 0          | 2           |
| 2013_027NL       | AD_non-lesional  | 0          | 0           |
| 2013_028L        | AD_lesional      | 0          | 27          |
| 2013_028NL       | AD_non-lesional  | 0          | 0           |
| 2013_029L        | AD_lesional      | 0          | 7           |
| 2013_029NL       | AD_non-lesional  | 0          | 0           |
| 2013_030L        | AD_lesional      | 1          | 6           |
| 2013_030NL       | AD_non-lesional  | 0          | 0           |

|            |                 |   |    |
|------------|-----------------|---|----|
| 2013_031L  | AD_lesional     | 0 | 12 |
| 2013_031NL | AD_non-lesional | 0 | 3  |
| 2013_032NL | AD_non-lesional | 0 | 5  |
| K_2013_002 | CO_healthy      | 0 | 0  |
| K_2013_003 | CO_healthy      | 0 | 4  |
| K_2013_004 | CO_healthy      | 1 | 1  |
| K_2013_006 | CO_healthy      | 1 | 0  |
| K_2013_008 | CO_healthy      | 1 | 0  |
| K_2013_009 | CO_healthy      | 0 | 1  |
| K_2013_010 | CO_healthy      | 0 | 0  |
| K_2013_011 | CO_healthy      | 0 | 0  |
| K_2013_013 | CO_healthy      | 1 | 0  |
| K_2013_014 | CO_healthy      | 0 | 1  |
| K_2013_015 | CO_healthy      | 0 | 1  |
| K_2013_016 | CO_healthy      | 0 | 0  |
| K_2013_017 | CO_healthy      | 1 | 3  |
| K_2013_018 | CO_healthy      | 3 | 0  |
| K_2013_019 | CO_healthy      | 1 | 0  |
| K_2013_020 | CO_healthy      | 0 | 2  |
| K_2013_022 | CO_healthy      | 0 | 0  |
| K_2013_024 | CO_healthy      | 0 | 0  |
| K_2013_025 | CO_healthy      | 0 | 1  |
| K_2013_026 | CO_healthy      | 3 | 0  |
| K_2013_029 | CO_healthy      | 0 | 0  |
| K_2013_030 | CO_healthy      | 1 | 4  |
| K_2013_031 | CO_healthy      | 0 | 1  |
| K_2013_032 | CO_healthy      | 1 | 1  |
| K_2013_033 | CO_healthy      | 0 | 0  |
| K_2013_034 | CO_healthy      | 0 | 1  |
| K_2013_035 | CO_healthy      | 6 | 0  |
| K_2013_036 | CO_healthy      | 1 | 3  |
| K_2013_037 | CO_healthy      | 2 | 0  |
| K_2013_038 | CO_healthy      | 0 | 0  |
| K_2013_039 | CO_healthy      | 0 | 0  |
| K_2013_040 | CO_healthy      | 0 | 0  |
| K_2013_041 | CO_healthy      | 1 | 0  |
| K_2013_042 | CO_healthy      | 0 | 1  |
| K_2013_043 | CO_healthy      | 0 | 0  |
| K_2013_044 | CO_healthy      | 1 | 1  |
| K_2013_045 | CO_healthy      | 0 | 0  |
| K_2013_046 | CO_healthy      | 0 | 0  |

|                |                  |   |    |
|----------------|------------------|---|----|
| Pso_2013_001L  | PSO_lesional     | 0 | 0  |
| Pso_2013_001NL | PSO_non-lesional | 0 | 0  |
| Pso_2013_002L  | PSO_lesional     | 0 | 0  |
| Pso_2013_002NL | PSO_non-lesional | 1 | 3  |
| Pso_2013_003L  | PSO_lesional     | 1 | 0  |
| Pso_2013_003NL | PSO_non-lesional | 0 | 3  |
| Pso_2013_005L  | PSO_lesional     | 0 | 6  |
| Pso_2013_005NL | PSO_non-lesional | 0 | 1  |
| Pso_2013_006L  | PSO_lesional     | 0 | 3  |
| Pso_2013_006NL | PSO_non-lesional | 0 | 0  |
| Pso_2013_007L  | PSO_lesional     | 0 | 0  |
| Pso_2013_007NL | PSO_non-lesional | 1 | 0  |
| Pso_2013_008L  | PSO_lesional     | 0 | 0  |
| Pso_2013_008NL | PSO_non-lesional | 1 | 0  |
| Pso_2013_009L  | PSO_lesional     | 0 | 0  |
| Pso_2013_009NL | PSO_non-lesional | 1 | 0  |
| Pso_2013_011L  | PSO_lesional     | 1 | 0  |
| Pso_2013_011NL | PSO_non-lesional | 0 | 0  |
| Pso_2013_012L  | PSO_lesional     | 0 | 0  |
| Pso_2013_012NL | PSO_non-lesional | 0 | 0  |
| Pso_2013_014L  | PSO_lesional     | 0 | 3  |
| Pso_2013_014NL | PSO_non-lesional | 0 | 5  |
| Pso_2013_015L  | PSO_lesional     | 1 | 0  |
| Pso_2013_015NL | PSO_non-lesional | 0 | 0  |
| Pso_2013_016L  | PSO_lesional     | 0 | 1  |
| Pso_2013_016NL | PSO_non-lesional | 1 | 0  |
| Pso_2013_017L  | PSO_lesional     | 0 | 0  |
| Pso_2013_017NL | PSO_non-lesional | 1 | 0  |
| Pso_2013_018L  | PSO_lesional     | 2 | 6  |
| Pso_2013_018NL | PSO_non-lesional | 0 | 0  |
| Pso_2013_020L  | PSO_lesional     | 1 | 5  |
| Pso_2013_020NL | PSO_non-lesional | 0 | 0  |
| Pso_2013_023L  | PSO_lesional     | 1 | 1  |
| Pso_2013_023NL | PSO_non-lesional | 0 | 0  |
| Pso_2013_024L  | PSO_lesional     | 1 | 26 |
| Pso_2013_024NL | PSO_non-lesional | 0 | 1  |
| Pso_2013_027L  | PSO_lesional     | 1 | 1  |
| Pso_2013_027NL | PSO_non-lesional | 1 | 3  |
| Pso_2013_028L  | PSO_lesional     | 0 | 0  |
| Pso_2013_028NL | PSO_non-lesional | 0 | 2  |
| Pso_2013_029L  | PSO_lesional     | 0 | 1  |

|                       |                  |   |     |
|-----------------------|------------------|---|-----|
| <b>Pso_2013_029NL</b> | PSO_non-lesional | 1 | 3   |
| <b>Pso_2013_030L</b>  | PSO_lesional     | 0 | 0   |
| <b>Pso_2013_030NL</b> | PSO_non-lesional | 0 | 0   |
| <b>Pso_2013_031L</b>  | PSO_lesional     | 0 | 0   |
| <b>Pso_2013_031NL</b> | PSO_non-lesional | 0 | 0   |
| <b>Pso_2013_033L</b>  | PSO_lesional     | 0 | 2   |
| <b>Pso_2013_033NL</b> | PSO_non-lesional | 0 | 0   |
| <b>Pso_2013_034L</b>  | PSO_lesional     | 1 | 0   |
| <b>Pso_2013_035L</b>  | PSO_lesional     | 0 | 0   |
| <b>Pso_2013_035NL</b> | PSO_non-lesional | 0 | 0   |
| <b>Pso_2013_036L</b>  | PSO_lesional     | 0 | 0   |
| <b>Pso_2013_036NL</b> | PSO_non-lesional | 3 | 0   |
| <b>Pso_2013_037L</b>  | PSO_lesional     | 1 | 3   |
| <b>Pso_2013_037NL</b> | PSO_non-lesional | 0 | 0   |
| <b>2016_001NL</b>     | AD_non-lesional  | 0 | 2   |
| <b>2016_001_c</b>     | AD_lesional      | 0 | 7   |
| <b>2016_002NL</b>     | AD_non-lesional  | 1 | 27  |
| <b>2016_002_c</b>     | AD_lesional      | 0 | 62  |
| <b>2013_032_c</b>     | AD_lesional      | 0 | 11  |
| <b>2016_004NL</b>     | AD_non-lesional  | 0 | 0   |
| <b>2016_004_c</b>     | AD_lesional      | 0 | 24  |
| <b>2016_005NL</b>     | AD_non-lesional  | 2 | 35  |
| <b>2016_005_c</b>     | AD_lesional      | 1 | 111 |
| <b>2016_006NL</b>     | AD_non-lesional  | 0 | 20  |
| <b>2016_006_c</b>     | AD_lesional      | 1 | 18  |
