# Supplementary material
Source: PubMed Central journal article supplement (PMC6711380)
Supplement: NIHMS1044514-supplement-Supple_Table_09.pdf [file NIHMS1044514-supplement-Supple_Table_09.pdf]

| <b>Samples</b> | <b>Skin</b>     | <b>Proportion CD8. Cells pct (1+log transformed)</b> |
|----------------|-----------------|------------------------------------------------------|
| 2013_005L      | AD_lesional     | 0.29                                                 |
| 2013_005NL     | AD_non-lesional | 0.09                                                 |
| 2013_006L      | AD_lesional     | 0.09                                                 |
| 2013_006NL     | AD_non-lesional | 1.59                                                 |
| 2013_007L      | AD_lesional     | 0.57                                                 |
| 2013_007NL     | AD_non-lesional | 0.06                                                 |
| 2013_009L      | AD_lesional     | 0.22                                                 |
| 2013_009NL     | AD_non-lesional | 0.22                                                 |
| 2013_014L      | AD_lesional     | 0.02                                                 |
| 2013_014NL     | AD_non-lesional | 0.09                                                 |
| 2013_016L      | AD_lesional     | 0.20                                                 |
| 2013_016NL     | AD_non-lesional | 0.00                                                 |
| 2013_019L      | AD_lesional     | 0.37                                                 |
| 2013_019NL     | AD_non-lesional | 0.18                                                 |
| 2013_021L      | AD_lesional     | 0.48                                                 |
| 2013_021NL     | AD_non-lesional | 0.16                                                 |
| 2013_024L      | AD_lesional     | 0.09                                                 |
| 2013_024NL     | AD_non-lesional | 0.00                                                 |
| 2013_026L      | AD_lesional     | 0.34                                                 |
| 2013_026NL     | AD_non-lesional | 0.11                                                 |
| 2013_029L      | AD_lesional     | 0.01                                                 |
| 2013_030NL     | AD_non-lesional | 0.23                                                 |
| 2013_031L      | AD_lesional     | 0.61                                                 |
| 2013_031NL     | AD_non-lesional | 0.39                                                 |
| 2013_032_c     | AD_lesional     | 0.06                                                 |
| 2013_032NL     | AD_non-lesional | 0.00                                                 |
| 2016_001_c     | AD_lesional     | 0.20                                                 |
| 2016_001NL     | AD_non-lesional | 0.21                                                 |
| 2016_002_c     | AD_lesional     | 0.38                                                 |
| 2016_002NL     | AD_non-lesional | 0.80                                                 |
| 2016_004_c     | AD_lesional     | 0.34                                                 |
| 2016_004NL     | AD_non-lesional | 0.20                                                 |
| 2016_005_c     | AD_lesional     | 0.37                                                 |
| 2016_005NL     | AD_non-lesional | 0.08                                                 |
| 2016_006_c     | AD_lesional     | 0.16                                                 |
| 2016_006NL     | AD_non-lesional | 0.18                                                 |
| K_2013_009     | CO_healthy      | 1.13                                                 |
| K_2013_014     | CO_healthy      | 1.47                                                 |
| K_2013_016     | CO_healthy      | 0.08                                                 |
| K_2013_017     | CO_healthy      | 0.00                                                 |

|                |                  |      |
|----------------|------------------|------|
| K_2013_019     | CO_healthy       | 0.14 |
| K_2013_020     | CO_healthy       | 0.02 |
| K_2013_022     | CO_healthy       | 0.06 |
| K_2013_029     | CO_healthy       | 0.23 |
| K_2013_030     | CO_healthy       | 0.00 |
| K_2013_032     | CO_healthy       | 0.16 |
| K_2013_033     | CO_healthy       | 0.01 |
| K_2013_034     | CO_healthy       | 0.32 |
| K_2013_035     | CO_healthy       | 0.12 |
| K_2013_036     | CO_healthy       | 0.56 |
| K_2013_037     | CO_healthy       | 0.31 |
| K_2013_038     | CO_healthy       | 0.11 |
| K_2013_039     | CO_healthy       | 0.07 |
| K_2013_040     | CO_healthy       | 0.83 |
| K_2013_041     | CO_healthy       | 0.53 |
| K_2013_042     | CO_healthy       | 0.44 |
| K_2013_043     | CO_healthy       | 1.32 |
| K_2013_044     | CO_healthy       | 1.42 |
| K_2013_045     | CO_healthy       | 0.99 |
| K_2013_046     | CO_healthy       | 0.06 |
| Pso_2013_001L  | PSO_lesional     | 0.83 |
| Pso_2013_001NI | PSO_non-lesional | 0.32 |
| Pso_2013_002L  | PSO_lesional     | 0.47 |
| Pso_2013_002NI | PSO_non-lesional | 0.03 |
| Pso_2013_003L  | PSO_lesional     | 0.89 |
| Pso_2013_003NI | PSO_non-lesional | 1.08 |
| Pso_2013_005L  | PSO_lesional     | 0.46 |
| Pso_2013_005NI | PSO_non-lesional | 1.07 |
| Pso_2013_006L  | PSO_lesional     | 0.50 |
| Pso_2013_006NI | PSO_non-lesional | 0.37 |
| Pso_2013_007L  | PSO_lesional     | 0.23 |
| Pso_2013_007NI | PSO_non-lesional | 1.03 |
| Pso_2013_008NI | PSO_non-lesional | 0.28 |
| Pso_2013_009L  | PSO_lesional     | 1.05 |
| Pso_2013_009NI | PSO_non-lesional | 0.05 |
| Pso_2013_011L  | PSO_lesional     | 0.94 |
| Pso_2013_011NI | PSO_non-lesional | 0.19 |
| Pso_2013_012L  | PSO_lesional     | 0.91 |
| Pso_2013_012NI | PSO_non-lesional | 0.83 |
| Pso_2013_014L  | PSO_lesional     | 0.97 |
| Pso_2013_014NI | PSO_non-lesional | 0.43 |

|                |                  |      |
|----------------|------------------|------|
| Pso_2013_015L  | PSO_lesional     | 1.01 |
| Pso_2013_015NI | PSO_non-lesional | 0.44 |
| Pso_2013_016L  | PSO_lesional     | 0.73 |
| Pso_2013_016NI | PSO_non-lesional | 0.50 |
| Pso_2013_017L  | PSO_lesional     | 1.50 |
| Pso_2013_017NI | PSO_non-lesional | 0.84 |
| Pso_2013_018L  | PSO_lesional     | 0.43 |
| Pso_2013_020L  | PSO_lesional     | 0.60 |
| Pso_2013_020NI | PSO_non-lesional | 0.33 |
| Pso_2013_023L  | PSO_lesional     | 1.58 |
| Pso_2013_023NI | PSO_non-lesional | 0.57 |
| Pso_2013_024NI | PSO_non-lesional | 0.98 |
| Pso_2013_027L  | PSO_lesional     | 1.06 |
| Pso_2013_027NI | PSO_non-lesional | 0.91 |
| Pso_2013_028L  | PSO_lesional     | 0.36 |
| Pso_2013_028NI | PSO_non-lesional | 0.86 |
| Pso_2013_029L  | PSO_lesional     | 0.99 |
| Pso_2013_029NI | PSO_non-lesional | 0.57 |
| Pso_2013_031L  | PSO_lesional     | 0.64 |
| Pso_2013_031NI | PSO_non-lesional | 0.65 |
| Pso_2013_033L  | PSO_lesional     | 0.56 |
| Pso_2013_033NI | PSO_non-lesional | 0.17 |
| Pso_2013_034L  | PSO_lesional     | 0.41 |
| Pso_2013_035L  | PSO_lesional     | 0.12 |
| Pso_2013_035NI | PSO_non-lesional | 0.19 |
| Pso_2013_036L  | PSO_lesional     | 0.09 |
| Pso_2013_036NI | PSO_non-lesional | 0.34 |
| Pso_2013_037L  | PSO_lesional     | 0.18 |
| Pso_2013_037NI | PSO_non-lesional | 0.05 |
