# Supplementary material
Source: PubMed Central journal article supplement (PMC6711380)
Supplement: NIHMS1044514-supplement-Supple_Table_11.pdf [file NIHMS1044514-supplement-Supple_Table_11.pdf]

|               | Pso_sev_cor | Pso_sev_p | AD_sev_cor | AD_sev_p |
|---------------|-------------|-----------|------------|----------|
| CTF1          | 0.18        | 3.47E-01  | 0.76       | 3.59E-06 |
| FGD3          | 0.30        | 1.23E-01  | 0.76       | 4.03E-06 |
| WIF1          | -0.45       | 1.69E-02  | -0.72      | 2.07E-05 |
| BCAP31P1      | 0.20        | 2.98E-01  | 0.71       | 3.94E-05 |
| IGFL4         | -0.33       | 9.04E-02  | 0.70       | 5.41E-05 |
| RP11-430H10.2 | 0.25        | 1.91E-01  | 0.70       | 5.47E-05 |
| SVIP          | -0.18       | 3.50E-01  | -0.70      | 5.53E-05 |
| TEAD1         | -0.25       | 1.94E-01  | -0.69      | 6.41E-05 |
| ATP13A5       | -0.36       | 5.66E-02  | -0.68      | 8.57E-05 |
| SHROOM2       | 0.48        | 8.97E-03  | 0.68       | 9.57E-05 |
| RP11-832A4.7  | 0.33        | 8.51E-02  | 0.68       | 1.06E-04 |
| G10488        | -0.18       | 3.57E-01  | -0.67      | 1.43E-04 |
| WNT5A         | 0.18        | 3.69E-01  | 0.66       | 1.59E-04 |
| KIF21A        | -0.39       | 4.09E-02  | -0.66      | 2.06E-04 |
| RP11-74M13.4  | -0.17       | 4.00E-01  | -0.65      | 2.12E-04 |
| CLIP4         | 0.07        | 7.14E-01  | -0.65      | 2.22E-04 |
| CCDC110       | -0.29       | 1.40E-01  | -0.65      | 2.41E-04 |
| RP11-288A5.2  | -0.09       | 6.56E-01  | -0.65      | 2.41E-04 |
| CNKSR2        | -0.34       | 7.66E-02  | -0.65      | 2.61E-04 |
| OR2T10        | -0.33       | 8.24E-02  | -0.65      | 2.61E-04 |
| TP73          | 0.31        | 1.13E-01  | 0.64       | 2.93E-04 |
| PCDH11X       | -0.22       | 2.54E-01  | -0.64      | 3.31E-04 |
| UPF3B         | -0.15       | 4.45E-01  | 0.64       | 3.37E-04 |
| RASAL2        | -0.62       | 4.76E-04  | -0.64      | 3.64E-04 |
| RP11-121C2.2  | -0.04       | 8.50E-01  | -0.63      | 3.86E-04 |
| NCAM2         | -0.09       | 6.50E-01  | -0.63      | 3.90E-04 |
| CDH12         | -0.42       | 2.52E-02  | -0.63      | 4.00E-04 |
| CTD-2380F24.1 | 0.16        | 4.23E-01  | -0.63      | 4.00E-04 |
| ZNF732        | -0.07       | 7.11E-01  | -0.63      | 4.00E-04 |
| SCEL          | -0.28       | 1.46E-01  | -0.63      | 4.20E-04 |
| PPP1R12A      | -0.08       | 6.83E-01  | -0.63      | 4.35E-04 |
| G3945         | 0.03        | 8.67E-01  | -0.63      | 4.42E-04 |
| SCIN          | -0.38       | 4.64E-02  | -0.63      | 4.42E-04 |
| ANKRD36BP2    | -0.44       | 1.84E-02  | -0.63      | 4.76E-04 |
| AC079466.1    | -0.18       | 3.52E-01  | -0.62      | 4.96E-04 |
| PLAU          | 0.17        | 3.80E-01  | 0.62       | 5.01E-04 |
| SNORA18       | -0.18       | 3.66E-01  | 0.62       | 5.09E-04 |
| AQP9          | -0.41       | 2.83E-02  | -0.62      | 5.13E-04 |
| RILPL2        | 0.09        | 6.36E-01  | 0.62       | 5.34E-04 |
| RP11-732A21.3 | -0.11       | 5.84E-01  | 0.62       | 5.34E-04 |
| KLF1          | 0.15        | 4.41E-01  | 0.62       | 5.61E-04 |
| PIWIL1        | -0.13       | 5.15E-01  | 0.62       | 5.70E-04 |
| CTC-479C5.10  | 0.14        | 4.90E-01  | -0.62      | 5.75E-04 |
| MTCL1         | 0.38        | 4.62E-02  | 0.62       | 5.75E-04 |
| XLOC_008968   | -0.05       | 8.08E-01  | 0.62       | 5.80E-04 |
| UNC5D         | -0.09       | 6.56E-01  | -0.62      | 5.80E-04 |

|                      |       |          |       |          |
|----------------------|-------|----------|-------|----------|
| <b>RP11-456K23.1</b> | 0.15  | 4.54E-01 | 0.62  | 5.99E-04 |
| <b>LGALS9C</b>       | 0.29  | 1.34E-01 | 0.62  | 6.33E-04 |
| <b>SETP17</b>        | -0.14 | 4.83E-01 | -0.61 | 6.49E-04 |
| <b>MAP4K2</b>        | 0.31  | 1.12E-01 | 0.61  | 6.59E-04 |
| <b>FAM83D</b>        | 0.34  | 7.27E-02 | 0.61  | 7.02E-04 |
| <b>SLC16A7</b>       | -0.02 | 9.10E-01 | -0.61 | 7.19E-04 |
| <b>STON2</b>         | 0.29  | 1.40E-01 | 0.61  | 7.30E-04 |
| <b>MTHFR</b>         | 0.19  | 3.39E-01 | 0.61  | 7.42E-04 |
| <b>FAM201A</b>       | -0.40 | 3.31E-02 | -0.61 | 7.47E-04 |
| <b>RASAL2-AS1</b>    | -0.25 | 2.02E-01 | -0.61 | 8.14E-04 |
| <b>SLC2A13</b>       | -0.27 | 1.63E-01 | -0.61 | 8.27E-04 |
| <b>WDR66</b>         | 0.05  | 7.88E-01 | 0.61  | 8.27E-04 |
| <b>XLOC_013541</b>   | 0.16  | 4.18E-01 | 0.60  | 8.53E-04 |
| <b>SMC5</b>          | 0.04  | 8.25E-01 | -0.60 | 8.53E-04 |
| <b>RBM17P1</b>       | -0.41 | 2.89E-02 | -0.60 | 8.59E-04 |
| <b>AGR3</b>          | 0.02  | 9.09E-01 | -0.60 | 8.86E-04 |
| <b>HTR7</b>          | 0.24  | 2.21E-01 | 0.60  | 8.93E-04 |
| <b>SULF2</b>         | 0.10  | 6.03E-01 | 0.60  | 9.00E-04 |
| <b>XLOC_008043</b>   | -0.46 | 1.32E-02 | -0.60 | 9.49E-04 |
| <b>WDR33</b>         | 0.02  | 9.16E-01 | -0.60 | 9.63E-04 |
| <b>RP11-127B20.2</b> | -0.07 | 7.13E-01 | -0.60 | 9.71E-04 |
| <b>CHAT</b>          | 0.18  | 3.52E-01 | 0.60  | 9.71E-04 |
| <b>STXBP6</b>        | -0.34 | 7.64E-02 | -0.60 | 9.78E-04 |
| <b>KRT37</b>         | 0.42  | 2.71E-02 | 0.60  | 9.78E-04 |
| <b>BLACAT1</b>       | 0.34  | 7.89E-02 | 0.60  | 9.85E-04 |
| <b>GJB4</b>          | -0.22 | 2.58E-01 | -0.60 | 9.85E-04 |
| <b>HSF2</b>          | -0.25 | 1.97E-01 | -0.60 | 1.00E-03 |
| <b>ZNF486</b>        | -0.20 | 3.02E-01 | -0.60 | 1.02E-03 |
| <b>CROT</b>          | 0.34  | 7.82E-02 | 0.60  | 1.02E-03 |
| <b>ARSA</b>          | 0.18  | 3.61E-01 | 0.60  | 1.02E-03 |
| <b>HMGA2</b>         | 0.23  | 2.37E-01 | 0.60  | 1.03E-03 |
| <b>CCL2</b>          | 0.26  | 1.73E-01 | 0.60  | 1.04E-03 |
| <b>ELFN2</b>         | -0.34 | 7.79E-02 | -0.60 | 1.04E-03 |
| <b>UNC5A</b>         | 0.21  | 2.89E-01 | 0.60  | 1.04E-03 |
| <b>DLG5</b>          | 0.08  | 6.91E-01 | 0.60  | 1.05E-03 |
| <b>ABHD12B</b>       | -0.17 | 3.95E-01 | -0.59 | 1.09E-03 |
| <b>KCNJ3</b>         | 0.10  | 6.19E-01 | -0.59 | 1.13E-03 |
| <b>FLYWCH1</b>       | 0.02  | 9.26E-01 | 0.59  | 1.14E-03 |
| <b>KCNA4</b>         | -0.19 | 3.45E-01 | -0.59 | 1.14E-03 |
| <b>ASB11</b>         | -0.05 | 7.85E-01 | -0.59 | 1.18E-03 |
| <b>CDR2</b>          | -0.26 | 1.79E-01 | -0.59 | 1.18E-03 |
| <b>RP11-227D13.1</b> | -0.03 | 8.73E-01 | 0.59  | 1.18E-03 |
| <b>WNT5A-AS1</b>     | 0.16  | 4.26E-01 | 0.59  | 1.18E-03 |
| <b>FAM179B</b>       | -0.14 | 4.76E-01 | -0.59 | 1.19E-03 |
| <b>MAVS</b>          | 0.32  | 9.56E-02 | 0.59  | 1.20E-03 |
| <b>G10489</b>        | -0.14 | 4.65E-01 | -0.59 | 1.20E-03 |
| <b>KCNV1</b>         | -0.16 | 4.29E-01 | -0.59 | 1.21E-03 |

|                      |       |          |       |          |
|----------------------|-------|----------|-------|----------|
| <b>TMPRSS6</b>       | -0.36 | 5.62E-02 | -0.59 | 1.22E-03 |
| <b>AC005048.1</b>    | -0.18 | 3.72E-01 | -0.59 | 1.25E-03 |
| <b>ZNF667</b>        | -0.15 | 4.47E-01 | -0.59 | 1.27E-03 |
| <b>RIN2</b>          | 0.21  | 2.80E-01 | 0.59  | 1.30E-03 |
| <b>KRT16P1</b>       | 0.23  | 2.34E-01 | 0.59  | 1.33E-03 |
| <b>GAN</b>           | -0.25 | 2.02E-01 | -0.58 | 1.35E-03 |
| <b>TMEM19</b>        | 0.25  | 1.98E-01 | 0.58  | 1.36E-03 |
| <b>INSIG2</b>        | -0.49 | 7.75E-03 | -0.58 | 1.37E-03 |
| <b>DNAJB14</b>       | 0.06  | 7.65E-01 | -0.58 | 1.40E-03 |
| <b>RP11-298I3.4</b>  | -0.04 | 8.41E-01 | 0.58  | 1.48E-03 |
| <b>AC011288.2</b>    | 0.05  | 7.96E-01 | 0.58  | 1.49E-03 |
| <b>TNFRSF17</b>      | 0.00  | 9.81E-01 | 0.58  | 1.51E-03 |
| <b>WI2-89927D4.1</b> | 0.00  | 9.90E-01 | 0.58  | 1.52E-03 |
| <b>LEF1-AS1</b>      | -0.37 | 5.12E-02 | -0.58 | 1.53E-03 |
| <b>RP11-88H12.2</b>  | 0.38  | 4.37E-02 | -0.58 | 1.57E-03 |
| <b>SUSD6</b>         | 0.14  | 4.66E-01 | 0.58  | 1.57E-03 |
| <b>HDAC11</b>        | -0.06 | 7.53E-01 | 0.58  | 1.61E-03 |
| <b>SERTAD4</b>       | 0.36  | 5.70E-02 | 0.58  | 1.62E-03 |
| <b>INPP1</b>         | 0.35  | 6.91E-02 | 0.58  | 1.64E-03 |
| <b>SALL4</b>         | 0.01  | 9.54E-01 | 0.58  | 1.64E-03 |
| <b>SUSD2</b>         | -0.16 | 4.29E-01 | -0.58 | 1.68E-03 |
| <b>ADAM23</b>        | 0.24  | 2.15E-01 | 0.58  | 1.70E-03 |
| <b>PGM5P4-AS1</b>    | -0.12 | 5.31E-01 | -0.57 | 1.75E-03 |
| <b>XG</b>            | -0.43 | 2.39E-02 | -0.57 | 1.75E-03 |
| <b>NET1</b>          | 0.04  | 8.48E-01 | -0.57 | 1.76E-03 |
| <b>PCBD2</b>         | 0.32  | 9.33E-02 | 0.57  | 1.77E-03 |
| <b>ANO3</b>          | -0.30 | 1.20E-01 | -0.57 | 1.80E-03 |
| <b>MAP3K14</b>       | -0.28 | 1.42E-01 | 0.57  | 1.80E-03 |
| <b>ARRDC2</b>        | 0.03  | 8.85E-01 | 0.57  | 1.86E-03 |
| <b>TRIM4</b>         | 0.00  | 9.89E-01 | 0.57  | 1.86E-03 |
| <b>ANKRD18A</b>      | -0.42 | 2.72E-02 | -0.57 | 1.90E-03 |
| <b>MSMB</b>          | -0.07 | 7.10E-01 | -0.57 | 1.90E-03 |
| <b>MYO9A</b>         | -0.29 | 1.29E-01 | -0.57 | 1.93E-03 |
| <b>RP11-438F14.3</b> | -0.04 | 8.26E-01 | -0.57 | 1.95E-03 |
| <b>MAPKAPK5</b>      | 0.07  | 7.30E-01 | -0.57 | 1.97E-03 |
| <b>ADORA2BP1</b>     | -0.16 | 4.16E-01 | -0.57 | 1.98E-03 |
| <b>TNFSF10</b>       | 0.36  | 5.82E-02 | 0.57  | 1.98E-03 |
| <b>SORCS2</b>        | 0.43  | 2.18E-02 | 0.57  | 1.99E-03 |
| <b>PPP1R3C</b>       | -0.12 | 5.50E-01 | 0.57  | 2.01E-03 |
| <b>NFIL3</b>         | 0.36  | 5.66E-02 | 0.57  | 2.03E-03 |
| <b>AC079753.5</b>    | -0.06 | 7.47E-01 | -0.57 | 2.06E-03 |
| <b>MYLIP</b>         | 0.16  | 4.20E-01 | 0.57  | 2.13E-03 |
| <b>RP11-420L9.2</b>  | -0.12 | 5.27E-01 | 0.57  | 2.13E-03 |
| <b>RP11-490D19.8</b> | -0.06 | 7.66E-01 | -0.56 | 2.15E-03 |
| <b>SGCG</b>          | -0.35 | 6.98E-02 | -0.56 | 2.18E-03 |
| <b>ANKRD34B</b>      | 0.09  | 6.57E-01 | 0.56  | 2.24E-03 |
| <b>AC093673.5</b>    | 0.37  | 5.10E-02 | 0.56  | 2.25E-03 |

|               |       |          |       |          |
|---------------|-------|----------|-------|----------|
| ARMCX5        | 0.17  | 3.82E-01 | -0.56 | 2.25E-03 |
| NLGN4X        | 0.11  | 5.62E-01 | 0.56  | 2.25E-03 |
| SPINK13       | 0.03  | 8.93E-01 | 0.56  | 2.27E-03 |
| AC104986.1    | -0.03 | 8.80E-01 | -0.56 | 2.30E-03 |
| PORCN         | 0.26  | 1.81E-01 | 0.56  | 2.31E-03 |
| CHML          | -0.07 | 7.10E-01 | -0.56 | 2.31E-03 |
| CTD-2378E12.1 | 0.06  | 7.50E-01 | -0.56 | 2.38E-03 |
| AC026740.1    | -0.13 | 5.08E-01 | -0.56 | 2.39E-03 |
| SPHK2         | 0.07  | 7.36E-01 | 0.56  | 2.44E-03 |
| PLEKHA5       | -0.24 | 2.14E-01 | -0.56 | 2.49E-03 |
| LAMA3         | -0.02 | 9.36E-01 | 0.56  | 2.52E-03 |
| ANKRD29       | 0.21  | 2.75E-01 | 0.56  | 2.59E-03 |
| TPBG          | 0.37  | 5.07E-02 | 0.56  | 2.61E-03 |
| RNU2-42P      | 0.03  | 8.98E-01 | -0.55 | 2.66E-03 |
| LYL1          | 0.10  | 6.04E-01 | 0.55  | 2.66E-03 |
| ATP13A4       | -0.03 | 8.87E-01 | -0.55 | 2.68E-03 |
| KCND3         | 0.31  | 1.14E-01 | 0.55  | 2.68E-03 |
| USP30-AS1     | 0.03  | 8.66E-01 | 0.55  | 2.68E-03 |
| CD200R1       | -0.17 | 4.01E-01 | 0.55  | 2.71E-03 |
| CDKN2B        | 0.32  | 1.01E-01 | 0.55  | 2.77E-03 |
| SYNDIG1L      | -0.21 | 2.95E-01 | 0.55  | 2.77E-03 |
| ALG1L         | 0.21  | 2.76E-01 | 0.55  | 2.78E-03 |
| MTUS1         | 0.10  | 5.96E-01 | 0.55  | 2.78E-03 |
| DFFB          | 0.24  | 2.14E-01 | 0.55  | 2.86E-03 |
| TRANK1        | 0.24  | 2.10E-01 | 0.55  | 2.86E-03 |
| CLSTN2        | -0.43 | 2.27E-02 | -0.55 | 2.89E-03 |
| TEX15         | 0.13  | 5.10E-01 | 0.55  | 2.89E-03 |
| CACNA2D3      | 0.36  | 6.18E-02 | 0.55  | 2.91E-03 |
| ARID5B        | 0.09  | 6.37E-01 | 0.55  | 2.97E-03 |
| FOXE1         | 0.64  | 2.50E-04 | 0.55  | 2.97E-03 |
| SNORA11B      | 0.17  | 3.93E-01 | 0.55  | 2.97E-03 |
| G25251        | -0.08 | 6.76E-01 | 0.55  | 3.05E-03 |
| NOTCH1        | 0.20  | 2.96E-01 | 0.55  | 3.05E-03 |
| C1RL          | 0.23  | 2.30E-01 | 0.55  | 3.07E-03 |
| TSPAN13       | 0.13  | 5.15E-01 | -0.55 | 3.07E-03 |
| MTHFD2L       | -0.16 | 4.19E-01 | -0.55 | 3.09E-03 |
| SNX30         | -0.04 | 8.28E-01 | -0.55 | 3.09E-03 |
| RP11-525K10.3 | -0.17 | 3.73E-01 | 0.55  | 3.11E-03 |
| SLC43A1       | -0.13 | 5.17E-01 | 0.55  | 3.11E-03 |
| KIAA0895      | -0.29 | 1.36E-01 | -0.55 | 3.13E-03 |
| PFKFB3        | 0.11  | 5.88E-01 | 0.55  | 3.13E-03 |
| ADAMDEC1      | 0.48  | 1.05E-02 | 0.55  | 3.15E-03 |
| INPP4B        | -0.29 | 1.34E-01 | -0.55 | 3.15E-03 |
| NAF1          | -0.20 | 3.03E-01 | -0.55 | 3.15E-03 |
| RN7SL748P     | 0.24  | 2.16E-01 | 0.55  | 3.15E-03 |
| B3GAT2        | 0.03  | 8.76E-01 | -0.55 | 3.19E-03 |
| CHST1         | 0.27  | 1.65E-01 | 0.55  | 3.21E-03 |

|                |       |          |       |          |
|----------------|-------|----------|-------|----------|
| LINC01443      | 0.19  | 3.26E-01 | 0.55  | 3.21E-03 |
| NDUFAF5        | -0.06 | 7.81E-01 | -0.55 | 3.21E-03 |
| TIMD4          | 0.20  | 3.00E-01 | 0.55  | 3.21E-03 |
| COL6A6         | -0.22 | 2.66E-01 | 0.55  | 3.27E-03 |
| TCN1           | 0.37  | 5.01E-02 | 0.55  | 3.27E-03 |
| RP11-96H17.3   | 0.10  | 6.23E-01 | -0.54 | 3.29E-03 |
| TUBB8P7        | 0.42  | 2.77E-02 | 0.54  | 3.31E-03 |
| MAK            | -0.32 | 9.47E-02 | -0.54 | 3.31E-03 |
| RASA2          | 0.03  | 8.97E-01 | -0.54 | 3.31E-03 |
| NCR3LG1        | -0.08 | 7.04E-01 | -0.54 | 3.36E-03 |
| BTG3           | 0.29  | 1.40E-01 | 0.54  | 3.38E-03 |
| CACHD1         | 0.26  | 1.81E-01 | 0.54  | 3.38E-03 |
| SNAI2          | 0.19  | 3.24E-01 | 0.54  | 3.40E-03 |
| SLC52A1        | 0.10  | 6.29E-01 | 0.54  | 3.44E-03 |
| AFAP1L2        | 0.30  | 1.25E-01 | 0.54  | 3.46E-03 |
| ABCG4          | 0.31  | 1.10E-01 | 0.54  | 3.49E-03 |
| CARD6          | 0.37  | 5.07E-02 | 0.54  | 3.49E-03 |
| AC067959.1     | -0.21 | 2.76E-01 | -0.54 | 3.51E-03 |
| ROBO1          | 0.19  | 3.33E-01 | 0.54  | 3.55E-03 |
| RPL39P40       | -0.06 | 7.61E-01 | 0.54  | 3.58E-03 |
| G4061          | -0.09 | 6.61E-01 | -0.54 | 3.60E-03 |
| SNTB1          | -0.34 | 7.97E-02 | -0.54 | 3.60E-03 |
| FBXO10         | 0.26  | 1.80E-01 | 0.54  | 3.62E-03 |
| RP11-624L4.1   | 0.05  | 8.12E-01 | 0.54  | 3.62E-03 |
| CLDN1          | -0.36 | 6.33E-02 | -0.54 | 3.67E-03 |
| TMEM185AP1     | 0.19  | 3.40E-01 | 0.54  | 3.67E-03 |
| METTL10        | -0.08 | 6.80E-01 | -0.54 | 3.74E-03 |
| PARP12         | 0.34  | 8.10E-02 | 0.54  | 3.76E-03 |
| SCCPDH         | -0.08 | 6.91E-01 | -0.54 | 3.76E-03 |
| G11854         | -0.15 | 4.47E-01 | -0.54 | 3.78E-03 |
| G41001         | 0.40  | 3.62E-02 | 0.54  | 3.88E-03 |
| RP11-3P17.4    | -0.14 | 4.73E-01 | -0.54 | 3.88E-03 |
| SLC39A13       | 0.25  | 2.03E-01 | 0.54  | 3.90E-03 |
| ANKRD65        | 0.10  | 5.99E-01 | 0.54  | 3.95E-03 |
| LBX2           | -0.36 | 6.18E-02 | 0.54  | 3.95E-03 |
| FAM179A        | -0.16 | 4.14E-01 | -0.54 | 4.00E-03 |
| RP11-425D10.10 | -0.07 | 7.30E-01 | 0.54  | 4.00E-03 |
| IRAK2          | 0.48  | 9.33E-03 | 0.54  | 4.03E-03 |
| MAP3K10        | 0.19  | 3.27E-01 | 0.54  | 4.03E-03 |
| CEL            | 0.02  | 9.31E-01 | -0.53 | 4.08E-03 |
| CCL18          | -0.08 | 6.93E-01 | 0.53  | 4.10E-03 |
| KIAA1324L      | -0.11 | 5.66E-01 | -0.53 | 4.13E-03 |
| RBMS2P1        | -0.18 | 3.57E-01 | 0.53  | 4.15E-03 |
| VPS37A         | 0.08  | 6.77E-01 | -0.53 | 4.15E-03 |
| CTDSP2         | -0.30 | 1.24E-01 | 0.53  | 4.18E-03 |
| SSH3           | -0.03 | 8.70E-01 | 0.53  | 4.18E-03 |
| ZNF566         | 0.05  | 8.16E-01 | -0.53 | 4.18E-03 |

|                |       |          |       |          |
|----------------|-------|----------|-------|----------|
| MDGA2          | -0.42 | 2.73E-02 | -0.53 | 4.26E-03 |
| G3386          | 0.16  | 4.06E-01 | 0.53  | 4.28E-03 |
| TMEM99         | -0.32 | 9.27E-02 | -0.53 | 4.28E-03 |
| KRT16P3        | 0.35  | 6.39E-02 | 0.53  | 4.31E-03 |
| LGR5           | -0.25 | 1.91E-01 | -0.53 | 4.31E-03 |
| C16orf89       | 0.18  | 3.53E-01 | -0.53 | 4.33E-03 |
| CACNA2D1       | -0.34 | 8.10E-02 | -0.53 | 4.33E-03 |
| BTC            | -0.10 | 5.96E-01 | -0.53 | 4.41E-03 |
| RP3-425C14.4   | 0.09  | 6.57E-01 | -0.53 | 4.41E-03 |
| FAM213B        | 0.29  | 1.40E-01 | 0.53  | 4.44E-03 |
| LINC01549      | 0.16  | 4.29E-01 | 0.53  | 4.44E-03 |
| SMYD4          | 0.13  | 4.95E-01 | 0.53  | 4.44E-03 |
| ZNF90          | -0.38 | 4.64E-02 | -0.53 | 4.50E-03 |
| MAB21L3        | 0.36  | 6.18E-02 | 0.53  | 4.52E-03 |
| RP11-1024P17.1 | -0.19 | 3.37E-01 | -0.53 | 4.52E-03 |
| MARVELD1       | 0.06  | 7.76E-01 | 0.53  | 4.55E-03 |
| IFNAR2         | 0.05  | 8.01E-01 | 0.53  | 4.63E-03 |
| GRIPAP1        | 0.18  | 3.67E-01 | 0.53  | 4.69E-03 |
| ANO7P1         | 0.18  | 3.49E-01 | 0.53  | 4.72E-03 |
| LGALS9B        | 0.17  | 3.97E-01 | 0.53  | 4.72E-03 |
| SAMD4A         | -0.28 | 1.45E-01 | -0.53 | 4.72E-03 |
| CCNJ           | 0.22  | 2.70E-01 | -0.53 | 4.75E-03 |
| ABCA7          | 0.02  | 9.33E-01 | 0.53  | 4.78E-03 |
| RP11-290L7.5   | -0.27 | 1.64E-01 | -0.53 | 4.81E-03 |
| C1QL2          | -0.19 | 3.40E-01 | -0.53 | 4.83E-03 |
| CISH           | -0.02 | 9.20E-01 | 0.53  | 4.83E-03 |
| KYNU           | 0.33  | 8.26E-02 | 0.53  | 4.83E-03 |
| TRIM14         | 0.36  | 5.96E-02 | 0.53  | 4.86E-03 |
| ANKRD20A5P     | -0.26 | 1.77E-01 | -0.53 | 4.92E-03 |
| BHLHE41        | -0.49 | 7.87E-03 | -0.53 | 4.92E-03 |
| EGFL6          | -0.08 | 6.98E-01 | 0.53  | 4.92E-03 |
| DLX4           | -0.01 | 9.49E-01 | -0.52 | 4.95E-03 |
| RSG1           | 0.08  | 6.89E-01 | 0.52  | 4.95E-03 |
| DIAPH2         | -0.23 | 2.33E-01 | -0.52 | 5.01E-03 |
| KIAA2022       | -0.38 | 4.66E-02 | -0.52 | 5.01E-03 |
| L3MBTL4        | -0.24 | 2.10E-01 | -0.52 | 5.01E-03 |
| ST5            | 0.29  | 1.30E-01 | 0.52  | 5.01E-03 |
| RP11-1148L6.8  | 0.18  | 3.66E-01 | 0.52  | 5.04E-03 |
| TLDC1          | 0.16  | 4.12E-01 | 0.52  | 5.04E-03 |
| RP11-119F7.3   | -0.53 | 3.93E-03 | 0.52  | 5.07E-03 |
| G23403         | -0.01 | 9.78E-01 | -0.52 | 5.10E-03 |
| G13883         | 0.36  | 5.76E-02 | 0.52  | 5.13E-03 |
| NAALAD2        | 0.06  | 7.76E-01 | -0.52 | 5.20E-03 |
| ARPIN          | 0.01  | 9.57E-01 | 0.52  | 5.23E-03 |
| FAM204A        | 0.15  | 4.61E-01 | -0.52 | 5.23E-03 |
| C9orf47        | -0.03 | 8.78E-01 | -0.52 | 5.26E-03 |
| TIPARP         | -0.14 | 4.64E-01 | -0.52 | 5.32E-03 |

|               |       |          |       |          |
|---------------|-------|----------|-------|----------|
| HS3ST4        | 0.28  | 1.50E-01 | 0.52  | 5.32E-03 |
| LGALS3BP      | 0.03  | 8.90E-01 | 0.52  | 5.38E-03 |
| RP13-516M14.4 | -0.05 | 8.04E-01 | 0.52  | 5.42E-03 |
| SNORA71C      | 0.17  | 3.95E-01 | 0.52  | 5.42E-03 |
| RPL19P14      | 0.05  | 8.08E-01 | 0.52  | 5.45E-03 |
| FER1L6        | -0.25 | 1.92E-01 | 0.52  | 5.48E-03 |
| SCUBE2        | -0.15 | 4.43E-01 | 0.52  | 5.48E-03 |
| CYP2J2        | -0.13 | 4.99E-01 | -0.52 | 5.51E-03 |
| RP11-247A12.7 | 0.09  | 6.43E-01 | -0.52 | 5.51E-03 |
| CHD3          | -0.04 | 8.28E-01 | 0.52  | 5.55E-03 |
| CLEC7A        | 0.57  | 1.70E-03 | 0.52  | 5.64E-03 |
| COL4A4        | -0.20 | 3.00E-01 | 0.52  | 5.68E-03 |
| PCDHGB5       | -0.33 | 8.67E-02 | -0.52 | 5.68E-03 |
| CRTAC1        | -0.12 | 5.54E-01 | 0.52  | 5.74E-03 |
| CTA-398F10.2  | -0.26 | 1.77E-01 | -0.52 | 5.74E-03 |
| AC007204.1    | -0.03 | 8.68E-01 | -0.52 | 5.85E-03 |
| LINC01032     | -0.03 | 8.81E-01 | -0.52 | 5.85E-03 |
| RMRPP2        | -0.38 | 4.56E-02 | 0.52  | 5.85E-03 |
| GPT2          | 0.32  | 9.56E-02 | 0.52  | 5.88E-03 |
| PCGF5         | -0.07 | 7.07E-01 | -0.52 | 5.88E-03 |
| UGT2A1        | -0.15 | 4.60E-01 | -0.52 | 5.88E-03 |
| CTD-2267D19.3 | 0.35  | 7.12E-02 | 0.52  | 5.91E-03 |
| LINC01300     | -0.32 | 9.90E-02 | -0.52 | 5.95E-03 |
| YEATS2        | 0.09  | 6.36E-01 | 0.52  | 5.95E-03 |
| KNDC1         | -0.02 | 9.23E-01 | 0.51  | 5.98E-03 |
| ZNF775        | 0.17  | 4.01E-01 | 0.51  | 5.98E-03 |
| DNAJC24       | -0.04 | 8.21E-01 | -0.51 | 6.02E-03 |
| C9orf91       | 0.40  | 3.36E-02 | 0.51  | 6.05E-03 |
| TMEM67        | 0.00  | 9.94E-01 | -0.51 | 6.09E-03 |
| DIEXF         | 0.10  | 6.31E-01 | -0.51 | 6.16E-03 |
| INPP5A        | -0.19 | 3.41E-01 | -0.51 | 6.20E-03 |
| ABR           | 0.39  | 4.07E-02 | 0.51  | 6.23E-03 |
| RP3-400B16.2  | -0.42 | 2.81E-02 | -0.51 | 6.31E-03 |
| VPS9D1        | 0.26  | 1.82E-01 | 0.51  | 6.34E-03 |
| AMDHD2        | 0.31  | 1.06E-01 | 0.51  | 6.42E-03 |
| RP11-68I3.10  | 0.01  | 9.51E-01 | 0.51  | 6.42E-03 |
| TRPT1         | 0.09  | 6.37E-01 | 0.51  | 6.45E-03 |
| HSD11B1       | -0.22 | 2.62E-01 | -0.51 | 6.49E-03 |
| CHRM2         | -0.16 | 4.06E-01 | -0.51 | 6.56E-03 |
| RTP4          | 0.38  | 4.80E-02 | 0.51  | 6.60E-03 |
| SIX5          | -0.14 | 4.88E-01 | 0.51  | 6.60E-03 |
| ARHGEF10      | -0.51 | 5.98E-03 | -0.51 | 6.68E-03 |
| MAP4K3        | -0.13 | 4.94E-01 | -0.51 | 6.68E-03 |
| BCL3          | 0.26  | 1.76E-01 | 0.51  | 6.68E-03 |
| TGM6          | 0.19  | 3.35E-01 | 0.51  | 6.68E-03 |
| AC144525.1    | -0.11 | 5.87E-01 | -0.51 | 6.72E-03 |
| CCDC87        | -0.11 | 5.61E-01 | 0.51  | 6.76E-03 |

|                       |       |          |       |          |
|-----------------------|-------|----------|-------|----------|
| <b>RP11-554I8.2</b>   | -0.15 | 4.50E-01 | 0.51  | 6.76E-03 |
| <b>AC000111.6</b>     | 0.06  | 7.76E-01 | -0.51 | 6.83E-03 |
| <b>SMAD1</b>          | 0.18  | 3.61E-01 | 0.51  | 6.83E-03 |
| <b>XLOC_001477</b>    | 0.28  | 1.56E-01 | 0.51  | 6.83E-03 |
| <b>AC019117.2</b>     | -0.25 | 1.96E-01 | 0.51  | 6.87E-03 |
| <b>RP11-712L6.5</b>   | 0.17  | 3.88E-01 | -0.51 | 6.91E-03 |
| <b>CDH26</b>          | 0.22  | 2.61E-01 | 0.51  | 6.91E-03 |
| <b>DPF2</b>           | 0.35  | 6.96E-02 | 0.51  | 6.91E-03 |
| <b>CSF1</b>           | 0.05  | 7.94E-01 | 0.51  | 6.95E-03 |
| <b>MACC1</b>          | -0.28 | 1.49E-01 | -0.51 | 6.99E-03 |
| <b>AC006372.4</b>     | -0.02 | 9.23E-01 | -0.51 | 7.07E-03 |
| <b>BCLAF1</b>         | -0.07 | 7.20E-01 | -0.51 | 7.07E-03 |
| <b>RNA5SP383</b>      | -0.26 | 1.81E-01 | 0.51  | 7.07E-03 |
| <b>RP11-428C19.5</b>  | -0.14 | 4.72E-01 | -0.51 | 7.07E-03 |
| <b>MGAT4A</b>         | -0.15 | 4.49E-01 | -0.51 | 7.11E-03 |
| <b>CHPT1</b>          | -0.09 | 6.37E-01 | -0.51 | 7.15E-03 |
| <b>G42895</b>         | 0.18  | 3.69E-01 | -0.51 | 7.15E-03 |
| <b>ARHGEF3</b>        | 0.14  | 4.64E-01 | 0.51  | 7.15E-03 |
| <b>AC011816.1</b>     | -0.07 | 7.38E-01 | 0.51  | 7.19E-03 |
| <b>DIRC3</b>          | -0.01 | 9.44E-01 | 0.50  | 7.23E-03 |
| <b>RP5-1097P24.1</b>  | 0.09  | 6.49E-01 | 0.50  | 7.31E-03 |
| <b>BACH2</b>          | -0.52 | 4.99E-03 | -0.50 | 7.36E-03 |
| <b>CERS6</b>          | -0.21 | 2.93E-01 | -0.50 | 7.36E-03 |
| <b>MS4A14</b>         | 0.19  | 3.39E-01 | 0.50  | 7.40E-03 |
| <b>AC005307.3</b>     | -0.08 | 6.68E-01 | -0.50 | 7.48E-03 |
| <b>CDH13</b>          | 0.15  | 4.35E-01 | 0.50  | 7.48E-03 |
| <b>TMEM56</b>         | -0.03 | 8.63E-01 | -0.50 | 7.52E-03 |
| <b>TPRKBP2</b>        | -0.32 | 9.33E-02 | -0.50 | 7.52E-03 |
| <b>NMNAT3</b>         | -0.10 | 6.21E-01 | -0.50 | 7.61E-03 |
| <b>FABP2</b>          | -0.14 | 4.70E-01 | -0.50 | 7.69E-03 |
| <b>GPR149</b>         | 0.02  | 9.03E-01 | 0.50  | 7.69E-03 |
| <b>MAPK8IP1</b>       | -0.17 | 3.95E-01 | -0.50 | 7.69E-03 |
| <b>GSG1</b>           | -0.44 | 1.91E-02 | -0.50 | 7.74E-03 |
| <b>KLK1</b>           | -0.44 | 1.80E-02 | -0.50 | 7.74E-03 |
| <b>SDK2</b>           | 0.34  | 7.69E-02 | 0.50  | 7.78E-03 |
| <b>CDH24</b>          | 0.04  | 8.51E-01 | 0.50  | 7.82E-03 |
| <b>NAGK</b>           | 0.27  | 1.63E-01 | 0.50  | 7.82E-03 |
| <b>TMPRSS4</b>        | 0.18  | 3.60E-01 | 0.50  | 7.82E-03 |
| <b>BMP3</b>           | -0.01 | 9.47E-01 | -0.50 | 7.82E-03 |
| <b>IDS</b>            | -0.05 | 7.91E-01 | -0.50 | 7.82E-03 |
| <b>LIN52</b>          | 0.01  | 9.60E-01 | -0.50 | 7.82E-03 |
| <b>CCDC88C</b>        | 0.00  | 9.94E-01 | 0.50  | 7.87E-03 |
| <b>KCTD3</b>          | -0.07 | 7.27E-01 | -0.50 | 7.87E-03 |
| <b>PALD1</b>          | 0.38  | 4.34E-02 | 0.50  | 7.87E-03 |
| <b>RP11-1008C21.1</b> | -0.13 | 5.09E-01 | -0.50 | 7.96E-03 |
| <b>ZNF790</b>         | -0.13 | 5.06E-01 | -0.50 | 8.00E-03 |
| <b>FBXO3</b>          | 0.02  | 9.02E-01 | -0.50 | 8.05E-03 |



|               |       |          |       |          |
|---------------|-------|----------|-------|----------|
| GRAMD2        | 0.27  | 1.63E-01 | 0.50  | 8.05E-03 |
| PTPN18        | -0.01 | 9.51E-01 | 0.50  | 8.05E-03 |
| RP11-546K22.3 | -0.02 | 9.32E-01 | -0.50 | 8.05E-03 |
| MYH14         | -0.38 | 4.52E-02 | -0.50 | 8.09E-03 |
| RP11-731J8.2  | 0.06  | 7.75E-01 | -0.50 | 8.09E-03 |
| WEE1          | -0.42 | 2.77E-02 | -0.50 | 8.09E-03 |
| EPHB2         | 0.47  | 1.19E-02 | 0.50  | 8.14E-03 |
| SP110         | 0.41  | 2.98E-02 | 0.50  | 8.27E-03 |
| AQP10         | -0.06 | 7.69E-01 | 0.50  | 8.32E-03 |
| NAA40         | 0.21  | 2.81E-01 | 0.50  | 8.36E-03 |
| RP11-848P1.2  | 0.11  | 5.94E-01 | 0.50  | 8.36E-03 |
| STARD5        | 0.08  | 6.69E-01 | 0.50  | 8.36E-03 |
| AL591704.7    | 0.43  | 2.34E-02 | 0.50  | 8.41E-03 |
| C11orf84      | 0.31  | 1.12E-01 | 0.50  | 8.41E-03 |
| CDH10         | -0.39 | 3.88E-02 | -0.50 | 8.41E-03 |
| OR2W3         | 0.22  | 2.68E-01 | 0.50  | 8.41E-03 |
| RP11-348P10.2 | 0.07  | 7.07E-01 | -0.50 | 8.41E-03 |
| UGT3A2        | -0.37 | 5.10E-02 | -0.50 | 8.41E-03 |
| AC006548.28   | -0.09 | 6.43E-01 | -0.50 | 8.46E-03 |
| RHOQP2        | -0.18 | 3.67E-01 | 0.50  | 8.46E-03 |
| YPEL2         | 0.09  | 6.58E-01 | 0.50  | 8.46E-03 |
| LNP1          | -0.29 | 1.30E-01 | -0.50 | 8.50E-03 |
| SPTAN1        | -0.34 | 7.46E-02 | -0.50 | 8.50E-03 |
| AC010731.2    | 0.18  | 3.72E-01 | 0.50  | 8.50E-03 |
| RP5-827C21.2  | 0.19  | 3.41E-01 | 0.50  | 8.50E-03 |
| RP5-1100H13.3 | 0.15  | 4.54E-01 | -0.50 | 8.55E-03 |
| C17orf62      | 0.29  | 1.37E-01 | 0.50  | 8.55E-03 |
| FLOT2         | 0.32  | 9.42E-02 | 0.50  | 8.55E-03 |
| FRMD5         | -0.19 | 3.20E-01 | 0.50  | 8.55E-03 |
| LINC00519     | 0.31  | 1.10E-01 | 0.50  | 8.55E-03 |
| CCR5          | 0.31  | 1.06E-01 | 0.50  | 8.60E-03 |
| HRK           | 0.12  | 5.49E-01 | 0.49  | 8.69E-03 |
| USP44         | 0.14  | 4.93E-01 | -0.49 | 8.69E-03 |
| RP11-477L16.2 | -0.35 | 6.39E-02 | -0.49 | 8.74E-03 |
| RP11-803P9.1  | 0.06  | 7.65E-01 | -0.49 | 8.74E-03 |
| PLA2G4F       | 0.34  | 7.64E-02 | 0.49  | 8.79E-03 |
| VSTM4         | 0.20  | 3.02E-01 | 0.49  | 8.79E-03 |
| G14803        | 0.01  | 9.45E-01 | -0.49 | 8.79E-03 |
| OR10A6        | -0.14 | 4.66E-01 | -0.49 | 8.79E-03 |
| C22orf46      | 0.36  | 5.62E-02 | 0.49  | 8.84E-03 |
| CTDSPL2       | -0.12 | 5.33E-01 | -0.49 | 8.84E-03 |
| ANKRD20A7P    | -0.49 | 7.71E-03 | -0.49 | 8.89E-03 |
| CCNF          | 0.22  | 2.65E-01 | 0.49  | 8.89E-03 |
| RNU1-2        | -0.03 | 8.98E-01 | 0.49  | 8.89E-03 |
| ZNF503-AS2    | 0.40  | 3.37E-02 | 0.49  | 8.89E-03 |
| CRABP1        | -0.63 | 3.20E-04 | -0.49 | 8.93E-03 |
| DHRS13        | 0.23  | 2.39E-01 | 0.49  | 8.98E-03 |

|               |       |          |       |          |
|---------------|-------|----------|-------|----------|
| ESPNNP        | -0.05 | 7.85E-01 | -0.49 | 9.03E-03 |
| IL37          | 0.10  | 6.23E-01 | -0.49 | 9.03E-03 |
| CTD-2555A7.2  | 0.14  | 4.84E-01 | 0.49  | 9.08E-03 |
| EPHA6         | -0.01 | 9.54E-01 | 0.49  | 9.18E-03 |
| DDX58         | 0.34  | 8.10E-02 | 0.49  | 9.23E-03 |
| GRB7          | -0.04 | 8.53E-01 | 0.49  | 9.28E-03 |
| XLOC_007895   | 0.24  | 2.12E-01 | 0.49  | 9.33E-03 |
| CFAP36        | -0.30 | 1.25E-01 | -0.49 | 9.38E-03 |
| LINC00601     | 0.03  | 8.63E-01 | -0.49 | 9.38E-03 |
| TNPO1P3       | 0.12  | 5.29E-01 | 0.49  | 9.38E-03 |
| ZNF582        | 0.06  | 7.79E-01 | -0.49 | 9.38E-03 |
| RP11-479G22.8 | -0.07 | 7.13E-01 | -0.49 | 9.43E-03 |
| ZNF319        | 0.37  | 5.44E-02 | 0.49  | 9.43E-03 |
| RP11-730A19.9 | 0.34  | 7.89E-02 | 0.49  | 9.49E-03 |
| BCAN          | -0.34 | 7.82E-02 | -0.49 | 9.49E-03 |
| RP11-686D22.8 | 0.32  | 9.36E-02 | 0.49  | 9.54E-03 |
| SIRT3         | -0.05 | 8.19E-01 | 0.49  | 9.54E-03 |
| SSTR2         | -0.08 | 6.72E-01 | -0.49 | 9.54E-03 |
| HHIP-AS1      | 0.32  | 9.99E-02 | -0.49 | 9.59E-03 |
| TMEM105       | -0.03 | 8.76E-01 | 0.49  | 9.59E-03 |
| ZNF542P       | 0.05  | 8.15E-01 | -0.49 | 9.59E-03 |
| GPA33         | -0.07 | 7.05E-01 | 0.49  | 9.64E-03 |
| NSUN3         | 0.20  | 3.18E-01 | -0.49 | 9.64E-03 |
| PLCG1         | 0.08  | 6.90E-01 | 0.49  | 9.64E-03 |
| ARHGEF7       | -0.36 | 6.01E-02 | -0.49 | 9.69E-03 |
| RP11-98L5.5   | -0.42 | 2.78E-02 | -0.49 | 9.69E-03 |
| SLC1A6        | -0.21 | 2.91E-01 | -0.49 | 9.69E-03 |
| RP11-553K23.2 | -0.30 | 1.26E-01 | -0.49 | 9.75E-03 |
| AC092159.2    | 0.05  | 8.17E-01 | -0.49 | 9.80E-03 |
| ZNF432        | -0.22 | 2.70E-01 | -0.49 | 9.80E-03 |
| CDK18         | -0.05 | 8.11E-01 | 0.49  | 9.85E-03 |
| OCEL1         | -0.05 | 8.13E-01 | 0.49  | 9.85E-03 |
| MMP14         | 0.14  | 4.73E-01 | 0.49  | 9.90E-03 |
| RPS10L        | 0.23  | 2.49E-01 | 0.49  | 9.90E-03 |
| SPRYD4        | 0.23  | 2.37E-01 | 0.49  | 9.90E-03 |
| XLOC_009602   | -0.01 | 9.66E-01 | 0.49  | 9.90E-03 |
| G6313         | -0.18 | 3.52E-01 | -0.49 | 9.96E-03 |
| ID4           | -0.33 | 9.01E-02 | -0.49 | 9.96E-03 |
| LRGUK         | -0.12 | 5.36E-01 | -0.49 | 9.96E-03 |
| ZNF681        | 0.42  | 2.81E-02 | -0.49 | 9.96E-03 |
| PTPN21        | -0.41 | 2.86E-02 | -0.49 | 1.00E-02 |
| ZNF343        | 0.16  | 4.22E-01 | -0.49 | 1.00E-02 |
| DCBLD1        | 0.29  | 1.40E-01 | 0.49  | 1.01E-02 |
| IQCB1         | 0.03  | 8.74E-01 | -0.49 | 1.01E-02 |
| OAS2          | 0.35  | 6.48E-02 | 0.49  | 1.01E-02 |
| RNU6-140P     | -0.05 | 8.04E-01 | 0.49  | 1.02E-02 |
| SCARNA20      | 0.31  | 1.04E-01 | 0.49  | 1.02E-02 |

|                     |       |          |       |          |
|---------------------|-------|----------|-------|----------|
| <b>RP1-239B22.5</b> | -0.16 | 4.08E-01 | -0.49 | 1.02E-02 |
| <b>TMEM220</b>      | -0.11 | 5.71E-01 | -0.49 | 1.03E-02 |
| <b>ZFP28</b>        | -0.07 | 7.23E-01 | -0.49 | 1.03E-02 |
| <b>ZNF529</b>       | -0.16 | 4.17E-01 | -0.49 | 1.03E-02 |
| <b>AC002331.1</b>   | 0.17  | 3.93E-01 | 0.49  | 1.03E-02 |
| <b>RANBP10</b>      | 0.26  | 1.77E-01 | 0.49  | 1.03E-02 |
| <b>ZNF711</b>       | 0.03  | 8.98E-01 | -0.49 | 1.03E-02 |
| <b>CES5A</b>        | 0.30  | 1.21E-01 | -0.48 | 1.04E-02 |
| <b>CHRM1</b>        | -0.34 | 7.39E-02 | -0.48 | 1.04E-02 |
| <b>TNFRSF8</b>      | 0.07  | 7.26E-01 | 0.48  | 1.04E-02 |
| <b>TSPAN8</b>       | -0.14 | 4.62E-01 | -0.48 | 1.04E-02 |
| <b>CCDC13-AS1</b>   | -0.14 | 4.70E-01 | -0.48 | 1.04E-02 |
| <b>G32333</b>       | -0.10 | 6.21E-01 | -0.48 | 1.04E-02 |
| <b>TNNC1</b>        | -0.39 | 4.21E-02 | -0.48 | 1.04E-02 |
| <b>VAV2</b>         | 0.07  | 7.13E-01 | 0.48  | 1.04E-02 |
| <b>G12029</b>       | -0.34 | 8.13E-02 | 0.48  | 1.05E-02 |
| <b>RN7SL526P</b>    | 0.04  | 8.22E-01 | -0.48 | 1.05E-02 |
| <b>RP11-243M5.3</b> | 0.04  | 8.25E-01 | 0.48  | 1.05E-02 |
| <b>RGS2</b>         | -0.05 | 8.11E-01 | -0.48 | 1.06E-02 |
| <b>RP11-33N14.3</b> | 0.05  | 8.03E-01 | -0.48 | 1.06E-02 |
| <b>FASTKD3</b>      | 0.01  | 9.66E-01 | -0.48 | 1.06E-02 |
| <b>GPR68</b>        | 0.30  | 1.17E-01 | 0.48  | 1.06E-02 |
| <b>NDE1</b>         | 0.26  | 1.75E-01 | 0.48  | 1.06E-02 |
| <b>ANGPTL4</b>      | 0.23  | 2.33E-01 | 0.48  | 1.07E-02 |
| <b>GPRASP2</b>      | -0.04 | 8.39E-01 | -0.48 | 1.07E-02 |
| <b>MYOZ2</b>        | -0.31 | 1.05E-01 | -0.48 | 1.07E-02 |
| <b>PCDHGA2</b>      | -0.44 | 1.97E-02 | -0.48 | 1.07E-02 |
| <b>TNFSF9</b>       | 0.20  | 3.01E-01 | 0.48  | 1.07E-02 |
| <b>CARD14</b>       | 0.31  | 1.12E-01 | 0.48  | 1.08E-02 |
| <b>CMTR1</b>        | 0.51  | 5.62E-03 | 0.48  | 1.08E-02 |
| <b>ENPP3</b>        | -0.39 | 3.94E-02 | -0.48 | 1.08E-02 |
| <b>TMEM173</b>      | 0.32  | 9.96E-02 | 0.48  | 1.08E-02 |
| <b>GGA2</b>         | -0.19 | 3.45E-01 | 0.48  | 1.09E-02 |
| <b>RP11-141M1.4</b> | -0.08 | 6.84E-01 | 0.48  | 1.09E-02 |
| <b>XLOC_013955</b>  | -0.19 | 3.32E-01 | -0.48 | 1.10E-02 |
| <b>KB-1460A1.5</b>  | -0.25 | 2.06E-01 | -0.48 | 1.11E-02 |
| <b>RP1-138B7.4</b>  | -0.15 | 4.39E-01 | -0.48 | 1.11E-02 |
| <b>MED22</b>        | 0.15  | 4.46E-01 | 0.48  | 1.11E-02 |
| <b>NFYA</b>         | 0.04  | 8.51E-01 | 0.48  | 1.11E-02 |
| <b>RNU5B-3P</b>     | 0.05  | 7.96E-01 | -0.48 | 1.11E-02 |
| <b>SDCCAG8</b>      | 0.10  | 6.16E-01 | 0.48  | 1.11E-02 |
| <b>CHST14</b>       | 0.12  | 5.46E-01 | 0.48  | 1.12E-02 |
| <b>EPB41</b>        | -0.27 | 1.57E-01 | -0.48 | 1.12E-02 |
| <b>ST6GALNAC1</b>   | 0.40  | 3.62E-02 | 0.48  | 1.12E-02 |
| <b>VGLL3</b>        | -0.25 | 1.98E-01 | -0.48 | 1.12E-02 |
| <b>XLOC_002793</b>  | 0.20  | 3.09E-01 | -0.48 | 1.12E-02 |
| <b>CA13</b>         | -0.06 | 7.61E-01 | -0.48 | 1.13E-02 |

|                      |       |          |       |          |
|----------------------|-------|----------|-------|----------|
| <b>AC016747.3</b>    | 0.23  | 2.48E-01 | 0.48  | 1.13E-02 |
| <b>HMGXB3</b>        | 0.32  | 9.74E-02 | 0.48  | 1.13E-02 |
| <b>RNU4-23P</b>      | -0.12 | 5.41E-01 | -0.48 | 1.13E-02 |
| <b>RP11-583F2.2</b>  | -0.18 | 3.52E-01 | -0.48 | 1.13E-02 |
| <b>AL022345.10</b>   | -0.07 | 7.27E-01 | -0.48 | 1.14E-02 |
| <b>MTFP1</b>         | 0.24  | 2.22E-01 | 0.48  | 1.14E-02 |
| <b>EXPH5</b>         | -0.29 | 1.30E-01 | -0.48 | 1.14E-02 |
| <b>RHOBTB3</b>       | -0.19 | 3.24E-01 | -0.48 | 1.14E-02 |
| <b>NHLRC4</b>        | -0.14 | 4.72E-01 | 0.48  | 1.15E-02 |
| <b>PEX11G</b>        | 0.29  | 1.38E-01 | 0.48  | 1.15E-02 |
| <b>PRUNE</b>         | 0.22  | 2.64E-01 | 0.48  | 1.15E-02 |
| <b>RP1-151F17.2</b>  | 0.22  | 2.66E-01 | 0.48  | 1.15E-02 |
| <b>ZNF254</b>        | 0.10  | 6.10E-01 | -0.48 | 1.15E-02 |
| <b>CNP</b>           | 0.31  | 1.07E-01 | 0.48  | 1.16E-02 |
| <b>FAM234B</b>       | -0.31 | 1.12E-01 | -0.48 | 1.16E-02 |
| <b>FHOD1</b>         | -0.10 | 6.03E-01 | 0.48  | 1.16E-02 |
| <b>JUN</b>           | 0.13  | 5.02E-01 | 0.48  | 1.16E-02 |
| <b>ALCAM</b>         | -0.23 | 2.38E-01 | -0.48 | 1.16E-02 |
| <b>CTD-2026G6.3</b>  | 0.05  | 7.87E-01 | -0.48 | 1.16E-02 |
| <b>PROM2</b>         | 0.26  | 1.89E-01 | 0.48  | 1.16E-02 |
| <b>RP11-17E13.2</b>  | -0.13 | 5.07E-01 | -0.48 | 1.16E-02 |
| <b>TLE3</b>          | 0.33  | 8.84E-02 | 0.48  | 1.16E-02 |
| <b>ID3</b>           | 0.07  | 7.12E-01 | 0.48  | 1.17E-02 |
| <b>FAM21A</b>        | 0.02  | 9.10E-01 | -0.48 | 1.17E-02 |
| <b>RP6-24A23.7</b>   | -0.45 | 1.65E-02 | -0.48 | 1.17E-02 |
| <b>ADAMTS7</b>       | 0.19  | 3.26E-01 | 0.48  | 1.17E-02 |
| <b>DGKZ</b>          | 0.30  | 1.23E-01 | 0.48  | 1.17E-02 |
| <b>VASH2</b>         | 0.01  | 9.50E-01 | 0.48  | 1.17E-02 |
| <b>G11189</b>        | -0.11 | 5.89E-01 | 0.48  | 1.18E-02 |
| <b>PML</b>           | 0.26  | 1.85E-01 | 0.48  | 1.18E-02 |
| <b>G25996</b>        | 0.34  | 7.74E-02 | 0.48  | 1.19E-02 |
| <b>G27456</b>        | 0.23  | 2.46E-01 | 0.48  | 1.19E-02 |
| <b>LINC01106</b>     | -0.11 | 5.67E-01 | 0.48  | 1.19E-02 |
| <b>BTNL10</b>        | 0.08  | 7.00E-01 | -0.48 | 1.19E-02 |
| <b>FAM21B</b>        | -0.07 | 7.30E-01 | 0.48  | 1.19E-02 |
| <b>PITX1</b>         | 0.15  | 4.49E-01 | 0.48  | 1.19E-02 |
| <b>VSIG10</b>        | -0.09 | 6.59E-01 | -0.48 | 1.19E-02 |
| <b>CXorf57</b>       | -0.18 | 3.54E-01 | -0.48 | 1.20E-02 |
| <b>EFNA1</b>         | 0.01  | 9.53E-01 | 0.48  | 1.20E-02 |
| <b>GNG4</b>          | -0.31 | 1.14E-01 | 0.48  | 1.20E-02 |
| <b>G16052</b>        | 0.33  | 9.01E-02 | 0.48  | 1.20E-02 |
| <b>GIMAP2</b>        | -0.13 | 5.22E-01 | 0.48  | 1.20E-02 |
| <b>HIP1</b>          | -0.01 | 9.42E-01 | 0.48  | 1.20E-02 |
| <b>MPP1</b>          | 0.00  | 9.93E-01 | 0.48  | 1.20E-02 |
| <b>PCBP4</b>         | -0.13 | 4.95E-01 | 0.48  | 1.20E-02 |
| <b>RP11-56B16.6</b>  | -0.20 | 3.02E-01 | -0.48 | 1.20E-02 |
| <b>RP11-785D18.3</b> | -0.10 | 6.04E-01 | 0.48  | 1.21E-02 |

|               |       |          |       |          |
|---------------|-------|----------|-------|----------|
| FAM110C       | 0.61  | 6.33E-04 | 0.48  | 1.22E-02 |
| LIPI          | -0.05 | 7.89E-01 | -0.48 | 1.22E-02 |
| PCAT29        | -0.20 | 3.09E-01 | 0.48  | 1.22E-02 |
| SNORD1B       | -0.14 | 4.87E-01 | 0.48  | 1.22E-02 |
| G14986        | -0.09 | 6.60E-01 | 0.48  | 1.22E-02 |
| GSDMC         | 0.44  | 1.91E-02 | 0.48  | 1.22E-02 |
| LHFPL3-AS1    | -0.09 | 6.64E-01 | -0.48 | 1.22E-02 |
| RNU6-647P     | -0.28 | 1.46E-01 | -0.48 | 1.22E-02 |
| SLC25A3P2     | -0.34 | 7.32E-02 | -0.48 | 1.22E-02 |
| ICAM5         | -0.21 | 2.87E-01 | 0.47  | 1.23E-02 |
| CDK6          | -0.01 | 9.69E-01 | -0.47 | 1.24E-02 |
| ZNF728        | -0.05 | 8.13E-01 | -0.47 | 1.24E-02 |
| RP11-240E2.2  | -0.01 | 9.66E-01 | -0.47 | 1.24E-02 |
| RP11-429E11.3 | 0.00  | 9.86E-01 | 0.47  | 1.24E-02 |
| TMEM150A      | -0.06 | 7.60E-01 | 0.47  | 1.24E-02 |
| LIPJ          | 0.01  | 9.60E-01 | -0.47 | 1.25E-02 |
| RP11-474G23.3 | 0.21  | 2.89E-01 | -0.47 | 1.25E-02 |
| AP4M1         | -0.07 | 7.21E-01 | 0.47  | 1.26E-02 |
| LINC00346     | -0.09 | 6.39E-01 | 0.47  | 1.26E-02 |
| APOL2         | 0.30  | 1.23E-01 | 0.47  | 1.26E-02 |
| HELB          | 0.18  | 3.72E-01 | 0.47  | 1.26E-02 |
| SLC8B1        | 0.22  | 2.63E-01 | 0.47  | 1.26E-02 |
| SNORA59B      | 0.39  | 3.77E-02 | -0.47 | 1.26E-02 |
| AADACP1       | -0.40 | 3.62E-02 | -0.47 | 1.27E-02 |
| CLDN23        | -0.45 | 1.66E-02 | -0.47 | 1.27E-02 |
| SLC35F5       | 0.11  | 5.68E-01 | -0.47 | 1.27E-02 |
| PRG2          | -0.21 | 2.92E-01 | -0.47 | 1.28E-02 |
| SDR42E1       | 0.44  | 1.81E-02 | 0.47  | 1.28E-02 |
| TECPR2        | 0.21  | 2.91E-01 | 0.47  | 1.28E-02 |
| TRERF1        | -0.04 | 8.21E-01 | 0.47  | 1.28E-02 |
| AC011431.2    | -0.07 | 7.17E-01 | -0.47 | 1.28E-02 |
| AKR1B10       | 0.27  | 1.71E-01 | 0.47  | 1.28E-02 |
| IAH1          | -0.12 | 5.41E-01 | 0.47  | 1.28E-02 |
| RP11-286H15.1 | -0.14 | 4.92E-01 | -0.47 | 1.28E-02 |
| TEX101        | -0.15 | 4.56E-01 | 0.47  | 1.28E-02 |
| TRIM60P17     | 0.07  | 7.05E-01 | -0.47 | 1.28E-02 |
| Z98044.1      | -0.12 | 5.28E-01 | -0.47 | 1.28E-02 |
| IKBKE         | 0.34  | 7.22E-02 | 0.47  | 1.29E-02 |
| LURAP1L       | 0.18  | 3.47E-01 | 0.47  | 1.29E-02 |
| RP11-142L1.1  | 0.35  | 7.05E-02 | -0.47 | 1.30E-02 |
| XLOC_002712   | -0.14 | 4.91E-01 | -0.47 | 1.30E-02 |
| CTD-2240E14.4 | 0.28  | 1.48E-01 | 0.47  | 1.30E-02 |
| G31075        | -0.13 | 5.07E-01 | -0.47 | 1.30E-02 |
| G38688        | 0.28  | 1.43E-01 | 0.47  | 1.30E-02 |
| KIAA0513      | 0.51  | 5.27E-03 | 0.47  | 1.30E-02 |
| TMEM55A       | -0.27 | 1.70E-01 | -0.47 | 1.30E-02 |
| LINC00900     | 0.28  | 1.53E-01 | 0.47  | 1.31E-02 |

|               |       |          |       |          |
|---------------|-------|----------|-------|----------|
| PIGZ          | -0.05 | 7.86E-01 | 0.47  | 1.31E-02 |
| RP4-809F4.1   | 0.04  | 8.59E-01 | -0.47 | 1.31E-02 |
| TRIM68        | 0.19  | 3.34E-01 | 0.47  | 1.31E-02 |
| ENO4          | -0.12 | 5.29E-01 | -0.47 | 1.32E-02 |
| RP11-2E11.6   | 0.00  | 9.99E-01 | -0.47 | 1.32E-02 |
| RP11-511P7.5  | 0.11  | 5.90E-01 | 0.47  | 1.32E-02 |
| VSIG1         | 0.22  | 2.65E-01 | -0.47 | 1.32E-02 |
| XLOC_008878   | 0.21  | 2.74E-01 | 0.47  | 1.32E-02 |
| SHROOM3       | 0.16  | 4.26E-01 | -0.47 | 1.33E-02 |
| CCND1         | -0.04 | 8.41E-01 | -0.47 | 1.34E-02 |
| PNMAL2        | -0.21 | 2.75E-01 | -0.47 | 1.34E-02 |
| RP11-129M16.4 | -0.17 | 3.85E-01 | -0.47 | 1.34E-02 |
| CCDC92        | 0.18  | 3.63E-01 | 0.47  | 1.34E-02 |
| GAS2          | 0.04  | 8.48E-01 | -0.47 | 1.34E-02 |
| AC011899.9    | 0.23  | 2.38E-01 | 0.47  | 1.35E-02 |
| ACCSL         | -0.28 | 1.51E-01 | -0.47 | 1.35E-02 |
| GNB1L         | 0.19  | 3.41E-01 | -0.47 | 1.35E-02 |
| GREM1         | -0.28 | 1.52E-01 | -0.47 | 1.35E-02 |
| G14419        | -0.03 | 8.91E-01 | 0.47  | 1.36E-02 |
| HOXB7         | -0.05 | 7.84E-01 | 0.47  | 1.36E-02 |
| PAOX          | -0.06 | 7.49E-01 | 0.47  | 1.36E-02 |
| XLOC_004198   | 0.01  | 9.40E-01 | 0.47  | 1.36E-02 |
| ZNF507        | -0.44 | 1.87E-02 | -0.47 | 1.36E-02 |
| AC005532.5    | -0.04 | 8.30E-01 | -0.47 | 1.36E-02 |
| CAMKK1        | -0.07 | 7.42E-01 | -0.47 | 1.36E-02 |
| VPS13A        | -0.21 | 2.74E-01 | -0.47 | 1.36E-02 |
| CXADR         | 0.04  | 8.25E-01 | 0.47  | 1.37E-02 |
| HILS1         | 0.10  | 6.23E-01 | -0.47 | 1.37E-02 |
| XLOC_002825   | -0.09 | 6.46E-01 | 0.47  | 1.37E-02 |
| RP11-153F5.3  | -0.39 | 3.95E-02 | -0.47 | 1.38E-02 |
| RP11-158K1.3  | -0.01 | 9.71E-01 | -0.47 | 1.38E-02 |
| RP11-556I14.2 | 0.12  | 5.49E-01 | -0.47 | 1.38E-02 |
| BEX5          | -0.26 | 1.78E-01 | -0.47 | 1.38E-02 |
| G9222         | -0.03 | 8.81E-01 | -0.47 | 1.38E-02 |
| MLC1          | -0.10 | 6.22E-01 | -0.47 | 1.38E-02 |
| PALMD         | -0.10 | 6.04E-01 | -0.47 | 1.38E-02 |
| RNU6-925P     | -0.18 | 3.49E-01 | -0.47 | 1.39E-02 |
| BCL2          | -0.35 | 7.01E-02 | -0.47 | 1.40E-02 |
| FGF14-IT1     | -0.34 | 7.29E-02 | -0.47 | 1.40E-02 |
| TENM3         | 0.18  | 3.69E-01 | 0.47  | 1.41E-02 |
| CTDSP1        | 0.20  | 3.13E-01 | 0.47  | 1.41E-02 |
| RP3-405J10.5  | 0.08  | 6.74E-01 | 0.47  | 1.41E-02 |
| G353          | 0.05  | 8.07E-01 | 0.47  | 1.42E-02 |
| LINC00992     | -0.20 | 3.04E-01 | -0.47 | 1.42E-02 |
| ZC3H12B       | -0.22 | 2.57E-01 | -0.47 | 1.42E-02 |
| ZNF580        | 0.32  | 9.87E-02 | 0.47  | 1.42E-02 |
| ABHD4         | 0.12  | 5.54E-01 | 0.47  | 1.43E-02 |

|               |       |          |       |          |
|---------------|-------|----------|-------|----------|
| PARP16        | 0.32  | 1.01E-01 | 0.47  | 1.43E-02 |
| PLEKH02       | 0.10  | 6.31E-01 | 0.47  | 1.43E-02 |
| RP11-707A18.1 | -0.16 | 4.25E-01 | -0.47 | 1.43E-02 |
| RP11-146D12.2 | -0.01 | 9.67E-01 | -0.47 | 1.43E-02 |
| RP11-288C18.1 | -0.12 | 5.45E-01 | -0.47 | 1.43E-02 |
| TRIM69        | 0.23  | 2.37E-01 | 0.47  | 1.43E-02 |
| RP11-615I2.3  | 0.03  | 8.67E-01 | 0.47  | 1.44E-02 |
| C20orf96      | -0.02 | 9.03E-01 | -0.47 | 1.45E-02 |
| CRNDE         | 0.11  | 5.69E-01 | -0.47 | 1.45E-02 |
| RNA5SP493     | -0.02 | 9.17E-01 | -0.47 | 1.45E-02 |
| TRIM51BP      | -0.18 | 3.63E-01 | -0.47 | 1.45E-02 |
| DLGAP3        | 0.21  | 2.72E-01 | 0.46  | 1.46E-02 |
| RP11-690D19.3 | 0.01  | 9.50E-01 | -0.46 | 1.46E-02 |
| GEM           | -0.25 | 1.93E-01 | -0.46 | 1.46E-02 |
| RP11-526F3.1  | 0.14  | 4.77E-01 | -0.46 | 1.46E-02 |
| TTY15         | 0.26  | 1.77E-01 | 0.46  | 1.46E-02 |
| AC078864.2    | -0.22 | 2.53E-01 | -0.46 | 1.47E-02 |
| C10orf99      | 0.42  | 2.68E-02 | 0.46  | 1.47E-02 |
| CTC-471J1.10  | -0.29 | 1.28E-01 | 0.46  | 1.47E-02 |
| SNX25         | -0.20 | 2.98E-01 | -0.46 | 1.47E-02 |
| SNX29         | -0.29 | 1.41E-01 | 0.46  | 1.47E-02 |
| LINC00305     | -0.29 | 1.38E-01 | -0.46 | 1.48E-02 |
| RHCE          | 0.12  | 5.47E-01 | 0.46  | 1.49E-02 |
| RP11-1148L6.5 | -0.07 | 7.32E-01 | 0.46  | 1.49E-02 |
| SYNE1         | -0.33 | 8.73E-02 | -0.46 | 1.49E-02 |
| TNIP3         | 0.36  | 6.26E-02 | 0.46  | 1.49E-02 |
| UBALD2        | 0.29  | 1.30E-01 | 0.46  | 1.49E-02 |
| CTBP1-AS2     | 0.25  | 2.03E-01 | 0.46  | 1.49E-02 |
| G10803        | 0.32  | 9.47E-02 | 0.46  | 1.49E-02 |
| GNAT1         | -0.25 | 1.94E-01 | -0.46 | 1.49E-02 |
| PELI2         | -0.30 | 1.24E-01 | -0.46 | 1.49E-02 |
| TLL1          | -0.01 | 9.50E-01 | -0.46 | 1.49E-02 |
| KCNH1         | 0.11  | 5.62E-01 | 0.46  | 1.50E-02 |
| RP11-218E20.3 | 0.16  | 4.16E-01 | 0.46  | 1.50E-02 |
| VSIG8         | 0.16  | 4.15E-01 | 0.46  | 1.50E-02 |
| PAX6          | 0.02  | 9.29E-01 | -0.46 | 1.50E-02 |
| SLAMF7        | 0.34  | 7.84E-02 | 0.46  | 1.51E-02 |
| SLC16A14      | 0.24  | 2.15E-01 | 0.46  | 1.51E-02 |
| CLTCL1        | 0.05  | 8.05E-01 | 0.46  | 1.52E-02 |
| MIR4482-1     | -0.11 | 5.63E-01 | -0.46 | 1.52E-02 |
| RP11-184A2.2  | -0.21 | 2.91E-01 | -0.46 | 1.52E-02 |
| IL13          | -0.33 | 8.16E-02 | 0.46  | 1.54E-02 |
| PLBD1-AS1     | -0.09 | 6.55E-01 | 0.46  | 1.54E-02 |
| RP11-817O13.9 | -0.35 | 6.87E-02 | 0.46  | 1.54E-02 |
| RPL36AP33     | 0.18  | 3.46E-01 | -0.46 | 1.54E-02 |
| CCL3          | 0.10  | 6.24E-01 | 0.46  | 1.55E-02 |
| RP11-436H11.5 | -0.39 | 4.04E-02 | -0.46 | 1.55E-02 |

|                       |       |          |       |          |
|-----------------------|-------|----------|-------|----------|
| <b>RP13-923O23.7</b>  | 0.06  | 7.70E-01 | -0.46 | 1.55E-02 |
| <b>FGF14-AS2</b>      | -0.08 | 6.98E-01 | -0.46 | 1.55E-02 |
| <b>LINC00862</b>      | -0.14 | 4.63E-01 | -0.46 | 1.55E-02 |
| <b>NFATC2</b>         | -0.49 | 8.44E-03 | -0.46 | 1.55E-02 |
| <b>R3HCC1L</b>        | 0.44  | 1.98E-02 | 0.46  | 1.55E-02 |
| <b>XLOC_002943</b>    | -0.06 | 7.59E-01 | -0.46 | 1.55E-02 |
| <b>G656</b>           | -0.06 | 7.80E-01 | -0.46 | 1.56E-02 |
| <b>GPR83</b>          | -0.19 | 3.37E-01 | -0.46 | 1.56E-02 |
| <b>HAGH</b>           | -0.08 | 6.80E-01 | 0.46  | 1.56E-02 |
| <b>GOLGA7B</b>        | 0.16  | 4.27E-01 | 0.46  | 1.57E-02 |
| <b>KRT16P4</b>        | 0.25  | 1.92E-01 | 0.46  | 1.57E-02 |
| <b>ZNF827</b>         | 0.06  | 7.53E-01 | 0.46  | 1.57E-02 |
| <b>LYPLAL1-AS1</b>    | 0.46  | 1.50E-02 | -0.46 | 1.57E-02 |
| <b>RP11-10K17.3</b>   | -0.03 | 8.67E-01 | 0.46  | 1.58E-02 |
| <b>RP11-736N17.4</b>  | -0.13 | 4.98E-01 | 0.46  | 1.58E-02 |
| <b>GOLGA8K</b>        | -0.40 | 3.63E-02 | -0.46 | 1.59E-02 |
| <b>RP4-655J12.5</b>   | -0.14 | 4.63E-01 | -0.46 | 1.59E-02 |
| <b>CCNJL</b>          | 0.08  | 6.82E-01 | 0.46  | 1.59E-02 |
| <b>NHS</b>            | -0.22 | 2.58E-01 | -0.46 | 1.59E-02 |
| <b>STBD1</b>          | 0.25  | 1.97E-01 | -0.46 | 1.59E-02 |
| <b>ARHGGEF26</b>      | -0.33 | 8.34E-02 | -0.46 | 1.60E-02 |
| <b>CCL23</b>          | -0.10 | 6.21E-01 | 0.46  | 1.61E-02 |
| <b>G23773</b>         | -0.05 | 7.99E-01 | -0.46 | 1.61E-02 |
| <b>GDF7</b>           | -0.25 | 1.99E-01 | -0.46 | 1.61E-02 |
| <b>CTD-3105H18.14</b> | -0.07 | 7.39E-01 | 0.46  | 1.62E-02 |
| <b>PPP1R14C</b>       | -0.26 | 1.78E-01 | -0.46 | 1.62E-02 |
| <b>RP11-134G8.7</b>   | 0.02  | 9.31E-01 | 0.46  | 1.62E-02 |
| <b>ZDHHC24</b>        | 0.21  | 2.87E-01 | 0.46  | 1.62E-02 |
| <b>MMP25</b>          | 0.04  | 8.38E-01 | 0.46  | 1.62E-02 |
| <b>MYEF2</b>          | -0.35 | 7.20E-02 | -0.46 | 1.63E-02 |
| <b>NUMA1</b>          | 0.01  | 9.75E-01 | 0.46  | 1.63E-02 |
| <b>AKAP12</b>         | -0.41 | 2.95E-02 | -0.46 | 1.64E-02 |
| <b>KCTD8</b>          | -0.31 | 1.12E-01 | -0.46 | 1.64E-02 |
| <b>MAP9</b>           | 0.05  | 8.08E-01 | -0.46 | 1.64E-02 |
| <b>DTX3L</b>          | 0.31  | 1.04E-01 | 0.46  | 1.65E-02 |
| <b>LDLRAP1</b>        | 0.46  | 1.45E-02 | 0.46  | 1.65E-02 |
| <b>RP11-129M6.1</b>   | -0.15 | 4.57E-01 | 0.46  | 1.65E-02 |
| <b>RP11-640L9.2</b>   | 0.39  | 3.97E-02 | 0.46  | 1.65E-02 |
| <b>CTC-471J1.11</b>   | 0.02  | 9.08E-01 | -0.46 | 1.66E-02 |
| <b>DPP6</b>           | 0.11  | 5.78E-01 | -0.46 | 1.66E-02 |
| <b>FAM189A2</b>       | -0.57 | 1.45E-03 | -0.46 | 1.66E-02 |
| <b>G16208</b>         | 0.17  | 3.86E-01 | 0.46  | 1.66E-02 |
| <b>NT5C2</b>          | 0.19  | 3.34E-01 | 0.46  | 1.66E-02 |
| <b>OLFM1</b>          | 0.24  | 2.20E-01 | 0.46  | 1.66E-02 |
| <b>RP11-344A16.2</b>  | -0.05 | 8.14E-01 | -0.46 | 1.66E-02 |
| <b>APOL1</b>          | 0.32  | 9.74E-02 | 0.46  | 1.67E-02 |
| <b>USP32P2</b>        | 0.39  | 4.04E-02 | 0.46  | 1.67E-02 |



|               |       |          |       |          |
|---------------|-------|----------|-------|----------|
| BCAP29        | -0.09 | 6.61E-01 | -0.46 | 1.67E-02 |
| SNX18P3       | -0.36 | 6.09E-02 | -0.46 | 1.67E-02 |
| XLOC_009826   | -0.11 | 5.80E-01 | -0.46 | 1.67E-02 |
| BRI3BP        | 0.12  | 5.44E-01 | -0.46 | 1.68E-02 |
| FAM35A        | -0.09 | 6.58E-01 | -0.46 | 1.68E-02 |
| RALGAPA1      | -0.26 | 1.90E-01 | -0.46 | 1.68E-02 |
| PRICKLE4      | 0.41  | 3.24E-02 | 0.46  | 1.68E-02 |
| AC104532.3    | 0.26  | 1.80E-01 | 0.46  | 1.69E-02 |
| RP11-138E9.2  | -0.40 | 3.52E-02 | 0.46  | 1.69E-02 |
| RP11-421F16.3 | -0.26 | 1.85E-01 | -0.46 | 1.69E-02 |
| RN7SKP178     | -0.05 | 8.17E-01 | -0.46 | 1.70E-02 |
| FAT2          | 0.17  | 3.98E-01 | 0.46  | 1.71E-02 |
| PRSS36        | -0.09 | 6.32E-01 | 0.46  | 1.71E-02 |
| CAMK2B        | 0.07  | 7.25E-01 | -0.46 | 1.71E-02 |
| CLASP2        | -0.11 | 5.69E-01 | -0.46 | 1.71E-02 |
| EFCAB6-AS1    | 0.20  | 3.15E-01 | 0.45  | 1.72E-02 |
| KRT16P5       | -0.10 | 6.02E-01 | 0.45  | 1.72E-02 |
| RP11-50D9.4   | 0.16  | 4.18E-01 | -0.45 | 1.72E-02 |
| C2orf42       | 0.16  | 4.29E-01 | 0.45  | 1.72E-02 |
| G30345        | 0.25  | 2.07E-01 | -0.45 | 1.72E-02 |
| HMCN1         | -0.21 | 2.92E-01 | 0.45  | 1.72E-02 |
| RP4-635E18.7  | 0.02  | 9.33E-01 | -0.45 | 1.72E-02 |
| SYCE3         | -0.10 | 5.95E-01 | 0.45  | 1.72E-02 |
| ADAMTS12      | 0.00  | 9.91E-01 | 0.45  | 1.73E-02 |
| MIR3926-2     | -0.17 | 3.79E-01 | -0.45 | 1.74E-02 |
| CIB2          | 0.21  | 2.83E-01 | 0.45  | 1.74E-02 |
| PLS3-AS1      | -0.29 | 1.36E-01 | 0.45  | 1.74E-02 |
| WNT3          | 0.15  | 4.38E-01 | 0.45  | 1.74E-02 |
| RP11-49K24.8  | -0.06 | 7.65E-01 | -0.45 | 1.75E-02 |
| BEX2          | -0.25 | 1.91E-01 | -0.45 | 1.76E-02 |
| CTA-212A2.1   | -0.03 | 8.64E-01 | 0.45  | 1.76E-02 |
| CYP2U1        | -0.30 | 1.22E-01 | -0.45 | 1.76E-02 |
| MAP3K3        | 0.12  | 5.39E-01 | 0.45  | 1.76E-02 |
| NDRG4         | 0.19  | 3.37E-01 | 0.45  | 1.76E-02 |
| CRIP1         | -0.50 | 6.47E-03 | -0.45 | 1.77E-02 |
| RP11-166B2.8  | -0.32 | 9.50E-02 | -0.45 | 1.77E-02 |
| SPX           | -0.08 | 7.03E-01 | -0.45 | 1.77E-02 |
| MAP3K2        | 0.13  | 5.13E-01 | -0.45 | 1.77E-02 |
| SSTR1         | -0.20 | 3.02E-01 | 0.45  | 1.77E-02 |
| OSTN          | 0.11  | 5.90E-01 | -0.45 | 1.78E-02 |
| CTTNBP2NL     | 0.17  | 3.88E-01 | 0.45  | 1.79E-02 |
| IL4R          | 0.30  | 1.22E-01 | 0.45  | 1.79E-02 |
| LINC00242     | 0.04  | 8.32E-01 | 0.45  | 1.79E-02 |
| TAF8          | 0.38  | 4.90E-02 | 0.45  | 1.79E-02 |
| RP11-421M1.8  | 0.05  | 7.86E-01 | -0.45 | 1.80E-02 |
| RP11-757O6.1  | -0.35 | 7.12E-02 | -0.45 | 1.80E-02 |
| AKR1B15       | 0.37  | 5.03E-02 | 0.45  | 1.80E-02 |

|               |       |          |       |          |
|---------------|-------|----------|-------|----------|
| DEF6          | 0.28  | 1.42E-01 | 0.45  | 1.80E-02 |
| DUOX1         | 0.09  | 6.59E-01 | 0.45  | 1.80E-02 |
| TGFB1         | 0.12  | 5.59E-01 | 0.45  | 1.80E-02 |
| TRPM6         | 0.41  | 2.92E-02 | 0.45  | 1.80E-02 |
| PRKD2         | 0.01  | 9.51E-01 | 0.45  | 1.81E-02 |
| RGL1          | 0.26  | 1.90E-01 | 0.45  | 1.82E-02 |
| TMC6          | -0.09 | 6.38E-01 | 0.45  | 1.82E-02 |
| CEP128        | -0.16 | 4.03E-01 | -0.45 | 1.83E-02 |
| PTK7          | 0.26  | 1.84E-01 | 0.45  | 1.83E-02 |
| AC004987.9    | 0.01  | 9.54E-01 | 0.45  | 1.84E-02 |
| AC118138.2    | -0.19 | 3.41E-01 | 0.45  | 1.84E-02 |
| FGD4          | -0.17 | 3.79E-01 | -0.45 | 1.84E-02 |
| RPS6KA6       | -0.16 | 4.28E-01 | -0.45 | 1.84E-02 |
| SLA2          | 0.21  | 2.73E-01 | 0.45  | 1.84E-02 |
| CLCF1         | -0.19 | 3.40E-01 | -0.45 | 1.85E-02 |
| CNNM4         | 0.41  | 2.95E-02 | 0.45  | 1.85E-02 |
| COL21A1       | -0.55 | 2.22E-03 | -0.45 | 1.85E-02 |
| CTA-292E10.6  | 0.14  | 4.62E-01 | -0.45 | 1.85E-02 |
| ZSWIM4        | 0.24  | 2.19E-01 | 0.45  | 1.85E-02 |
| GRK5          | 0.05  | 8.03E-01 | 0.45  | 1.85E-02 |
| PLAT          | 0.19  | 3.39E-01 | 0.45  | 1.85E-02 |
| RP1-100J12.1  | -0.10 | 6.29E-01 | -0.45 | 1.85E-02 |
| SLC24A1       | -0.02 | 9.31E-01 | 0.45  | 1.85E-02 |
| ZFAND4        | -0.20 | 3.02E-01 | -0.45 | 1.85E-02 |
| CTA-384D8.36  | 0.23  | 2.31E-01 | 0.45  | 1.86E-02 |
| GLYAT         | 0.02  | 9.08E-01 | 0.45  | 1.86E-02 |
| RP11-168F9.2  | -0.09 | 6.39E-01 | -0.45 | 1.86E-02 |
| RP11-214K3.18 | 0.05  | 7.89E-01 | -0.45 | 1.86E-02 |
| RP11-73M18.7  | 0.36  | 5.66E-02 | -0.45 | 1.86E-02 |
| RP11-989E6.3  | 0.22  | 2.62E-01 | 0.45  | 1.86E-02 |
| STX7          | -0.45 | 1.51E-02 | -0.45 | 1.86E-02 |
| TMEM237       | -0.19 | 3.36E-01 | -0.45 | 1.86E-02 |
| TSPYL5        | -0.11 | 5.92E-01 | -0.45 | 1.86E-02 |
| CTB-49A3.2    | -0.07 | 7.26E-01 | 0.45  | 1.87E-02 |
| G22375        | 0.16  | 4.24E-01 | -0.45 | 1.87E-02 |
| STXBP5-AS1    | -0.04 | 8.25E-01 | 0.45  | 1.87E-02 |
| CYP21A2       | 0.04  | 8.48E-01 | -0.45 | 1.88E-02 |
| PANK3         | 0.31  | 1.06E-01 | -0.45 | 1.88E-02 |
| SEMA4B        | 0.28  | 1.53E-01 | 0.45  | 1.88E-02 |
| SERPINB13     | 0.16  | 4.07E-01 | 0.45  | 1.88E-02 |
| AC002310.17   | 0.02  | 9.33E-01 | -0.45 | 1.89E-02 |
| G5386         | 0.06  | 7.47E-01 | 0.45  | 1.89E-02 |
| HTR1F         | -0.22 | 2.69E-01 | 0.45  | 1.89E-02 |
| LCORL         | -0.13 | 5.15E-01 | -0.45 | 1.89E-02 |
| LINC00392     | 0.04  | 8.28E-01 | -0.45 | 1.89E-02 |
| MCMDC2        | -0.08 | 6.74E-01 | -0.45 | 1.89E-02 |
| RAVER1        | 0.10  | 6.09E-01 | 0.45  | 1.89E-02 |

|                |       |          |       |          |
|----------------|-------|----------|-------|----------|
| LGMN           | 0.44  | 1.89E-02 | 0.45  | 1.90E-02 |
| GPS2P1         | 0.02  | 9.23E-01 | 0.45  | 1.91E-02 |
| HSF5           | 0.16  | 4.30E-01 | 0.45  | 1.91E-02 |
| TRIM58         | 0.15  | 4.33E-01 | 0.45  | 1.91E-02 |
| ATG10-IT1      | -0.21 | 2.78E-01 | 0.45  | 1.92E-02 |
| OASL           | 0.42  | 2.56E-02 | 0.45  | 1.92E-02 |
| RP11-1166P10.1 | 0.34  | 7.69E-02 | -0.45 | 1.92E-02 |
| RP4-736H5.3    | 0.13  | 5.12E-01 | -0.45 | 1.92E-02 |
| SLITRK5        | 0.00  | 9.82E-01 | -0.45 | 1.92E-02 |
| SLC6A8         | 0.38  | 4.90E-02 | 0.45  | 1.93E-02 |
| USP19          | 0.21  | 2.81E-01 | 0.45  | 1.93E-02 |
| AC006557.1     | -0.43 | 2.08E-02 | -0.45 | 1.93E-02 |
| LONRF1         | -0.22 | 2.50E-01 | -0.45 | 1.93E-02 |
| MRPS31P5       | 0.05  | 8.14E-01 | -0.45 | 1.93E-02 |
| ZNF725P        | 0.08  | 7.02E-01 | -0.45 | 1.94E-02 |
| FAM76A         | -0.05 | 7.87E-01 | -0.45 | 1.95E-02 |
| LINC01102      | -0.12 | 5.53E-01 | -0.45 | 1.95E-02 |
| LINC01336      | 0.12  | 5.29E-01 | 0.45  | 1.95E-02 |
| RP11-115N12.1  | 0.14  | 4.93E-01 | -0.45 | 1.95E-02 |
| RP11-423H2.1   | 0.02  | 9.03E-01 | 0.45  | 1.95E-02 |
| RP11-89K10.1   | -0.04 | 8.38E-01 | -0.45 | 1.95E-02 |
| SUSD3          | 0.10  | 6.18E-01 | 0.45  | 1.95E-02 |
| RLN2           | 0.12  | 5.56E-01 | -0.45 | 1.96E-02 |
| AC073043.1     | -0.18 | 3.55E-01 | -0.45 | 1.97E-02 |
| TSLP           | 0.36  | 6.26E-02 | 0.45  | 1.97E-02 |
| ANKRD20A1      | 0.05  | 8.17E-01 | -0.45 | 1.98E-02 |
| COL6A5         | -0.25 | 1.95E-01 | 0.45  | 1.98E-02 |
| GPX2           | 0.26  | 1.79E-01 | 0.45  | 1.98E-02 |
| KRT16P6        | 0.08  | 6.96E-01 | 0.45  | 1.98E-02 |
| RBM27          | 0.08  | 6.96E-01 | -0.45 | 1.98E-02 |
| SPAG1          | -0.22 | 2.65E-01 | -0.45 | 1.98E-02 |
| XLOC_003378    | 0.15  | 4.50E-01 | 0.45  | 1.98E-02 |
| ZBTB5          | -0.09 | 6.39E-01 | 0.45  | 1.98E-02 |
| MIR31HG        | 0.26  | 1.78E-01 | 0.45  | 1.99E-02 |
| RORA           | -0.28 | 1.44E-01 | -0.45 | 1.99E-02 |
| SNORD3C        | 0.42  | 2.73E-02 | 0.45  | 1.99E-02 |
| LINC01293      | -0.05 | 7.94E-01 | 0.45  | 2.00E-02 |
| RPS15AP34      | 0.02  | 9.24E-01 | -0.45 | 2.00E-02 |
| SLC12A6        | -0.11 | 5.77E-01 | 0.45  | 2.00E-02 |
| AGRN           | 0.27  | 1.68E-01 | 0.44  | 2.01E-02 |
| LEPROT         | 0.22  | 2.65E-01 | 0.44  | 2.01E-02 |
| RP11-1E4.1     | -0.07 | 7.17E-01 | -0.44 | 2.01E-02 |
| RP11-64D22.1   | -0.16 | 4.15E-01 | -0.44 | 2.01E-02 |
| ZNF487         | -0.21 | 2.72E-01 | -0.44 | 2.01E-02 |
| RP11-87N3.6    | -0.19 | 3.22E-01 | 0.44  | 2.02E-02 |
| IER5L          | 0.14  | 4.87E-01 | 0.44  | 2.03E-02 |
| LINC00237      | 0.10  | 6.11E-01 | 0.44  | 2.03E-02 |

|                      |       |          |       |          |
|----------------------|-------|----------|-------|----------|
| <b>NXPE2</b>         | -0.23 | 2.39E-01 | -0.44 | 2.03E-02 |
| <b>XLOC_000610</b>   | -0.25 | 1.95E-01 | -0.44 | 2.03E-02 |
| <b>AQP5</b>          | 0.13  | 5.20E-01 | 0.44  | 2.04E-02 |
| <b>PCP4L1</b>        | 0.34  | 7.54E-02 | 0.44  | 2.04E-02 |
| <b>RSPO3</b>         | -0.25 | 1.98E-01 | 0.44  | 2.04E-02 |
| <b>RP1-27K12.4</b>   | 0.09  | 6.63E-01 | -0.44 | 2.04E-02 |
| <b>RP11-101E13.5</b> | -0.22 | 2.68E-01 | -0.44 | 2.04E-02 |
| <b>RP11-697E22.2</b> | -0.16 | 4.20E-01 | -0.44 | 2.04E-02 |
| <b>RP3-337H4.10</b>  | -0.28 | 1.44E-01 | -0.44 | 2.04E-02 |
| <b>APITD1-CORT</b>   | -0.20 | 3.15E-01 | -0.44 | 2.05E-02 |
| <b>CDC42EP1</b>      | 0.25  | 1.93E-01 | 0.44  | 2.05E-02 |
| <b>LYPLA1P3</b>      | 0.25  | 1.98E-01 | -0.44 | 2.05E-02 |
| <b>PAX5</b>          | 0.14  | 4.69E-01 | 0.44  | 2.05E-02 |
| <b>UCHL5</b>         | 0.08  | 6.86E-01 | -0.44 | 2.05E-02 |
| <b>ACP5</b>          | 0.26  | 1.75E-01 | 0.44  | 2.06E-02 |
| <b>HYAL1</b>         | 0.02  | 9.08E-01 | 0.44  | 2.06E-02 |
| <b>LILRB4</b>        | 0.11  | 5.83E-01 | 0.44  | 2.06E-02 |
| <b>MFSD2B</b>        | 0.38  | 4.78E-02 | 0.44  | 2.06E-02 |
| <b>SIPA1</b>         | 0.10  | 6.18E-01 | 0.44  | 2.06E-02 |
| <b>DTWD1</b>         | -0.20 | 3.15E-01 | -0.44 | 2.06E-02 |
| <b>GRIA4</b>         | -0.48 | 9.75E-03 | -0.44 | 2.06E-02 |
| <b>RPL7L1P2</b>      | -0.35 | 6.84E-02 | -0.44 | 2.06E-02 |
| <b>XLOC_013506</b>   | -0.09 | 6.35E-01 | -0.44 | 2.06E-02 |
| <b>RP4-694A7.2</b>   | 0.17  | 3.85E-01 | -0.44 | 2.07E-02 |
| <b>AC008074.4</b>    | -0.12 | 5.43E-01 | -0.44 | 2.08E-02 |
| <b>RP11-387H17.4</b> | -0.09 | 6.40E-01 | -0.44 | 2.08E-02 |
| <b>MYOF</b>          | -0.14 | 4.80E-01 | 0.44  | 2.09E-02 |
| <b>RNF31</b>         | 0.17  | 3.75E-01 | 0.44  | 2.09E-02 |
| <b>RP11-137L10.5</b> | -0.32 | 9.45E-02 | -0.44 | 2.10E-02 |
| <b>RP13-726E6.2</b>  | -0.25 | 1.97E-01 | -0.44 | 2.10E-02 |
| <b>MN1</b>           | -0.06 | 7.44E-01 | 0.44  | 2.10E-02 |
| <b>PIGV</b>          | 0.12  | 5.52E-01 | 0.44  | 2.10E-02 |
| <b>EFNB2</b>         | -0.22 | 2.54E-01 | -0.44 | 2.11E-02 |
| <b>TRDMT1</b>        | -0.30 | 1.16E-01 | -0.44 | 2.11E-02 |
| <b>AC007879.7</b>    | 0.00  | 9.85E-01 | 0.44  | 2.12E-02 |
| <b>SOWAHB</b>        | -0.16 | 4.17E-01 | -0.44 | 2.13E-02 |
| <b>AASS</b>          | 0.32  | 9.62E-02 | 0.44  | 2.13E-02 |
| <b>RN7SKP282</b>     | 0.15  | 4.49E-01 | 0.44  | 2.13E-02 |
| <b>ACTRT3</b>        | 0.04  | 8.37E-01 | 0.44  | 2.14E-02 |
| <b>C4orf19</b>       | -0.39 | 4.04E-02 | -0.44 | 2.14E-02 |
| <b>EPHX4</b>         | 0.06  | 7.71E-01 | 0.44  | 2.14E-02 |
| <b>GATSL2</b>        | -0.26 | 1.85E-01 | 0.44  | 2.14E-02 |
| <b>IL10RB-AS1</b>    | 0.01  | 9.54E-01 | 0.44  | 2.14E-02 |
| <b>XLOC_004197</b>   | 0.13  | 5.01E-01 | 0.44  | 2.14E-02 |
| <b>GJA5</b>          | 0.00  | 9.99E-01 | 0.44  | 2.15E-02 |
| <b>UPF1</b>          | 0.23  | 2.42E-01 | 0.44  | 2.15E-02 |
| <b>WDR48</b>         | 0.10  | 6.19E-01 | 0.44  | 2.15E-02 |

|                       |       |          |       |          |
|-----------------------|-------|----------|-------|----------|
| ZFYVE28               | 0.07  | 7.25E-01 | 0.44  | 2.15E-02 |
| <b>RP11-330M2.4</b>   | -0.11 | 5.91E-01 | -0.44 | 2.15E-02 |
| THOC1                 | -0.18 | 3.59E-01 | -0.44 | 2.15E-02 |
| CA3                   | -0.03 | 8.92E-01 | -0.44 | 2.16E-02 |
| KPNA5                 | -0.04 | 8.50E-01 | -0.44 | 2.16E-02 |
| RAI14                 | -0.31 | 1.08E-01 | -0.44 | 2.16E-02 |
| TRBV27                | 0.14  | 4.87E-01 | 0.44  | 2.16E-02 |
| ZNF114                | -0.12 | 5.28E-01 | -0.44 | 2.16E-02 |
| AADACL3               | -0.12 | 5.55E-01 | -0.44 | 2.17E-02 |
| <b>AL590084.1</b>     | -0.04 | 8.55E-01 | -0.44 | 2.17E-02 |
| CYP4X1                | 0.24  | 2.18E-01 | 0.44  | 2.17E-02 |
| DLC1                  | -0.36 | 5.62E-02 | -0.44 | 2.17E-02 |
| G7779                 | 0.19  | 3.26E-01 | 0.44  | 2.17E-02 |
| <b>RP11-1016B18.1</b> | 0.07  | 7.41E-01 | -0.44 | 2.17E-02 |
| BARD1                 | -0.09 | 6.51E-01 | -0.44 | 2.18E-02 |
| KCNMB4                | -0.15 | 4.40E-01 | -0.44 | 2.18E-02 |
| KRTAP5-4              | 0.26  | 1.75E-01 | 0.44  | 2.18E-02 |
| <b>RP11-435O5.6</b>   | -0.22 | 2.53E-01 | -0.44 | 2.18E-02 |
| TMEM47                | -0.33 | 8.29E-02 | -0.44 | 2.18E-02 |
| C17orf67              | 0.12  | 5.29E-01 | 0.44  | 2.20E-02 |
| <b>CTD-2336O2.1</b>   | -0.05 | 8.16E-01 | 0.44  | 2.20E-02 |
| FAM109A               | 0.11  | 5.63E-01 | 0.44  | 2.21E-02 |
| CDKAL1                | -0.29 | 1.36E-01 | -0.44 | 2.22E-02 |
| TLK1P1                | -0.18 | 3.72E-01 | -0.44 | 2.22E-02 |
| USP45                 | 0.03  | 8.62E-01 | -0.44 | 2.22E-02 |
| ADA                   | -0.05 | 8.05E-01 | 0.44  | 2.23E-02 |
| FAM83F                | 0.32  | 9.24E-02 | 0.44  | 2.23E-02 |
| LMOD2                 | 0.02  | 9.06E-01 | -0.44 | 2.23E-02 |
| PTGDR2                | -0.13 | 5.09E-01 | 0.44  | 2.23E-02 |
| SGSH                  | -0.01 | 9.48E-01 | 0.44  | 2.24E-02 |
| G25631                | 0.27  | 1.72E-01 | -0.44 | 2.26E-02 |
| PEBP4                 | -0.06 | 7.48E-01 | -0.44 | 2.26E-02 |
| <b>RP11-252A24.3</b>  | 0.03  | 8.98E-01 | 0.44  | 2.26E-02 |
| CATSPER3              | 0.25  | 2.00E-01 | 0.44  | 2.27E-02 |
| CLDN14                | 0.12  | 5.27E-01 | 0.44  | 2.27E-02 |
| EFNA5                 | -0.14 | 4.93E-01 | -0.44 | 2.27E-02 |
| MURC                  | 0.00  | 9.90E-01 | 0.44  | 2.27E-02 |
| OSBPL3                | 0.16  | 4.13E-01 | -0.44 | 2.27E-02 |
| <b>RP11-430H10.3</b>  | 0.25  | 1.93E-01 | 0.44  | 2.27E-02 |
| <b>RP11-783K16.13</b> | 0.25  | 2.01E-01 | 0.44  | 2.27E-02 |
| TCERG1                | 0.16  | 4.12E-01 | -0.44 | 2.27E-02 |
| <b>APCDD1L-AS1</b>    | -0.47 | 1.11E-02 | -0.44 | 2.28E-02 |
| PLD2                  | 0.15  | 4.49E-01 | 0.44  | 2.28E-02 |
| ZNF282                | 0.33  | 8.53E-02 | 0.44  | 2.28E-02 |
| AMBRA1                | 0.18  | 3.71E-01 | 0.44  | 2.29E-02 |
| HSPA6                 | -0.35 | 7.20E-02 | 0.44  | 2.30E-02 |
| <b>KB-1205A7.1</b>    | 0.17  | 3.88E-01 | -0.44 | 2.30E-02 |

|                       |       |          |       |          |
|-----------------------|-------|----------|-------|----------|
| <b>MEMO1P1</b>        | 0.33  | 8.67E-02 | -0.44 | 2.30E-02 |
| <b>NIPAL1</b>         | -0.08 | 6.80E-01 | -0.44 | 2.30E-02 |
| <b>RAB3B</b>          | -0.27 | 1.64E-01 | -0.44 | 2.30E-02 |
| <b>SNORA74A</b>       | 0.21  | 2.85E-01 | 0.44  | 2.30E-02 |
| <b>TUBG2</b>          | 0.32  | 9.24E-02 | 0.44  | 2.30E-02 |
| <b>ACRBP</b>          | 0.00  | 9.88E-01 | 0.44  | 2.32E-02 |
| <b>LRRC39</b>         | -0.09 | 6.33E-01 | -0.44 | 2.32E-02 |
| <b>PTCHD4</b>         | 0.03  | 8.95E-01 | 0.44  | 2.32E-02 |
| <b>UCK1</b>           | 0.06  | 7.51E-01 | 0.44  | 2.32E-02 |
| <b>G11629</b>         | -0.10 | 6.20E-01 | 0.44  | 2.33E-02 |
| <b>PCDHGA1</b>        | -0.13 | 5.03E-01 | 0.44  | 2.33E-02 |
| <b>CD3D</b>           | 0.24  | 2.26E-01 | 0.43  | 2.34E-02 |
| <b>HNRNPA1P21</b>     | -0.11 | 5.92E-01 | 0.43  | 2.34E-02 |
| <b>PBX2</b>           | 0.05  | 7.99E-01 | 0.43  | 2.34E-02 |
| <b>PYGO2</b>          | 0.56  | 1.91E-03 | 0.43  | 2.34E-02 |
| <b>RP4-616B8.5</b>    | 0.01  | 9.48E-01 | 0.43  | 2.34E-02 |
| <b>BST1</b>           | -0.04 | 8.29E-01 | -0.43 | 2.35E-02 |
| <b>ETNK2</b>          | -0.32 | 1.01E-01 | -0.43 | 2.35E-02 |
| <b>RP1-272L16.1</b>   | 0.34  | 7.49E-02 | 0.43  | 2.35E-02 |
| <b>C10orf55</b>       | 0.23  | 2.39E-01 | 0.43  | 2.36E-02 |
| <b>LGR6</b>           | -0.19 | 3.36E-01 | 0.43  | 2.36E-02 |
| <b>NRXN3</b>          | -0.41 | 2.86E-02 | -0.43 | 2.36E-02 |
| <b>RPL23AP87</b>      | -0.12 | 5.39E-01 | -0.43 | 2.36E-02 |
| <b>CTNS</b>           | 0.11  | 5.79E-01 | 0.43  | 2.37E-02 |
| <b>PCDHGB4</b>        | -0.21 | 2.78E-01 | -0.43 | 2.37E-02 |
| <b>RP11-1263C18.1</b> | -0.20 | 2.96E-01 | -0.43 | 2.37E-02 |
| <b>DOC2GP</b>         | 0.04  | 8.52E-01 | -0.43 | 2.38E-02 |
| <b>RP11-958F21.1</b>  | 0.22  | 2.54E-01 | 0.43  | 2.38E-02 |
| <b>RP11-177H2.1</b>   | -0.17 | 3.77E-01 | -0.43 | 2.39E-02 |
| <b>RP11-464C19.3</b>  | -0.39 | 4.23E-02 | -0.43 | 2.39E-02 |
| <b>ZNF682</b>         | -0.31 | 1.09E-01 | -0.43 | 2.39E-02 |
| <b>N4BP1</b>          | 0.39  | 4.28E-02 | 0.43  | 2.39E-02 |
| <b>APBA3</b>          | 0.11  | 5.66E-01 | 0.43  | 2.40E-02 |
| <b>PPFIBP2</b>        | 0.16  | 4.20E-01 | 0.43  | 2.40E-02 |
| <b>ADAM21</b>         | -0.08 | 6.80E-01 | -0.43 | 2.41E-02 |
| <b>CTB-50L17.10</b>   | 0.06  | 7.61E-01 | 0.43  | 2.41E-02 |
| <b>LTB4R</b>          | 0.36  | 5.70E-02 | 0.43  | 2.41E-02 |
| <b>NKX1-2</b>         | 0.34  | 7.27E-02 | -0.43 | 2.41E-02 |
| <b>RP11-184I16.4</b>  | -0.03 | 8.80E-01 | -0.43 | 2.41E-02 |
| <b>SLC4A11</b>        | 0.14  | 4.88E-01 | 0.43  | 2.41E-02 |
| <b>CDKL1</b>          | -0.25 | 1.93E-01 | -0.43 | 2.43E-02 |
| <b>EDARADD</b>        | 0.17  | 3.96E-01 | 0.43  | 2.43E-02 |
| <b>AMBP</b>           | -0.02 | 9.35E-01 | -0.43 | 2.44E-02 |
| <b>CCM2</b>           | 0.28  | 1.48E-01 | 0.43  | 2.44E-02 |
| <b>G33837</b>         | 0.01  | 9.59E-01 | -0.43 | 2.44E-02 |
| <b>JMJD4</b>          | 0.23  | 2.46E-01 | 0.43  | 2.44E-02 |
| <b>MTM1</b>           | -0.08 | 7.01E-01 | -0.43 | 2.44E-02 |

|                      |       |          |       |          |
|----------------------|-------|----------|-------|----------|
| <b>NOP14-AS1</b>     | 0.44  | 1.89E-02 | 0.43  | 2.44E-02 |
| <b>SLC9A3R2</b>      | -0.32 | 9.87E-02 | 0.43  | 2.44E-02 |
| <b>WDR64</b>         | -0.04 | 8.39E-01 | -0.43 | 2.44E-02 |
| <b>C16orf74</b>      | -0.12 | 5.59E-01 | -0.43 | 2.45E-02 |
| <b>MED25</b>         | 0.10  | 6.31E-01 | 0.43  | 2.45E-02 |
| <b>SESN2</b>         | 0.44  | 2.01E-02 | 0.43  | 2.45E-02 |
| <b>ERCC2</b>         | 0.05  | 7.88E-01 | 0.43  | 2.46E-02 |
| <b>FRRS1</b>         | 0.31  | 1.08E-01 | 0.43  | 2.46E-02 |
| <b>G43312</b>        | 0.05  | 7.89E-01 | -0.43 | 2.46E-02 |
| <b>TAC1</b>          | -0.30 | 1.23E-01 | -0.43 | 2.46E-02 |
| <b>ATP9A</b>         | 0.18  | 3.69E-01 | 0.43  | 2.47E-02 |
| <b>IL15RA</b>        | 0.10  | 6.20E-01 | 0.43  | 2.47E-02 |
| <b>RNVU1-18</b>      | 0.04  | 8.46E-01 | 0.43  | 2.47E-02 |
| <b>KRBOX1</b>        | 0.16  | 4.25E-01 | -0.43 | 2.48E-02 |
| <b>STC1</b>          | 0.16  | 4.14E-01 | -0.43 | 2.48E-02 |
| <b>AC073410.1</b>    | -0.02 | 9.31E-01 | 0.43  | 2.49E-02 |
| <b>BCO1</b>          | -0.09 | 6.60E-01 | -0.43 | 2.49E-02 |
| <b>G19270</b>        | -0.21 | 2.91E-01 | -0.43 | 2.49E-02 |
| <b>G41661</b>        | -0.12 | 5.43E-01 | -0.43 | 2.50E-02 |
| <b>LAT2</b>          | 0.14  | 4.64E-01 | 0.43  | 2.50E-02 |
| <b>PCDHGA12</b>      | -0.17 | 3.93E-01 | 0.43  | 2.50E-02 |
| <b>PDK4</b>          | -0.17 | 3.83E-01 | -0.43 | 2.50E-02 |
| <b>ARHGAP44</b>      | 0.05  | 7.95E-01 | -0.43 | 2.52E-02 |
| <b>OR55B1P</b>       | 0.07  | 7.40E-01 | -0.43 | 2.52E-02 |
| <b>PSD3</b>          | -0.51 | 5.80E-03 | -0.43 | 2.52E-02 |
| <b>SBNO2</b>         | 0.19  | 3.39E-01 | 0.43  | 2.52E-02 |
| <b>TRIM2</b>         | -0.15 | 4.38E-01 | -0.43 | 2.52E-02 |
| <b>G31097</b>        | -0.17 | 3.94E-01 | 0.43  | 2.53E-02 |
| <b>IGF2BP3</b>       | 0.36  | 6.07E-02 | -0.43 | 2.53E-02 |
| <b>MET</b>           | -0.13 | 5.26E-01 | -0.43 | 2.53E-02 |
| <b>SLCO1A2</b>       | -0.30 | 1.15E-01 | -0.43 | 2.53E-02 |
| <b>ABCC10</b>        | 0.17  | 3.81E-01 | 0.43  | 2.54E-02 |
| <b>C5orf46</b>       | -0.26 | 1.73E-01 | -0.43 | 2.54E-02 |
| <b>HVCN1</b>         | 0.39  | 4.01E-02 | 0.43  | 2.54E-02 |
| <b>RP11-308D16.2</b> | -0.31 | 1.14E-01 | -0.43 | 2.54E-02 |
| <b>SLC4A8</b>        | 0.36  | 5.88E-02 | 0.43  | 2.54E-02 |
| <b>PRKCB</b>         | -0.29 | 1.35E-01 | -0.43 | 2.55E-02 |
| <b>CENPBD1</b>       | -0.09 | 6.63E-01 | 0.43  | 2.55E-02 |
| <b>KRT8P12</b>       | -0.17 | 3.96E-01 | 0.43  | 2.55E-02 |
| <b>NELL2</b>         | -0.17 | 3.92E-01 | 0.43  | 2.55E-02 |
| <b>RN7SL767P</b>     | 0.04  | 8.30E-01 | 0.43  | 2.55E-02 |
| <b>RP1-50J22.4</b>   | -0.06 | 7.57E-01 | 0.43  | 2.55E-02 |
| <b>SLCO2A1</b>       | -0.33 | 8.70E-02 | 0.43  | 2.55E-02 |
| <b>CLIP2</b>         | 0.21  | 2.73E-01 | 0.43  | 2.56E-02 |
| <b>G15987</b>        | -0.03 | 8.77E-01 | 0.43  | 2.57E-02 |
| <b>MMP19</b>         | 0.01  | 9.54E-01 | 0.43  | 2.57E-02 |
| <b>RP11-293B20.2</b> | -0.10 | 6.09E-01 | 0.43  | 2.57E-02 |

|                      |       |          |       |          |
|----------------------|-------|----------|-------|----------|
| SYNPO                | 0.08  | 6.82E-01 | 0.43  | 2.57E-02 |
| HELT                 | -0.28 | 1.45E-01 | -0.43 | 2.57E-02 |
| LZTFL1               | -0.32 | 9.59E-02 | -0.43 | 2.57E-02 |
| <b>CTC-487M23.5</b>  | -0.18 | 3.65E-01 | -0.43 | 2.59E-02 |
| SLC12A4              | -0.01 | 9.67E-01 | 0.43  | 2.59E-02 |
| CASP10               | 0.15  | 4.57E-01 | 0.43  | 2.60E-02 |
| RCHY1                | 0.22  | 2.69E-01 | -0.43 | 2.60E-02 |
| GPC5-AS2             | -0.13 | 5.19E-01 | -0.43 | 2.61E-02 |
| LIPE                 | 0.33  | 9.12E-02 | 0.43  | 2.61E-02 |
| MRV11-AS1            | -0.15 | 4.60E-01 | -0.43 | 2.61E-02 |
| NCAPD3               | -0.25 | 1.94E-01 | -0.43 | 2.61E-02 |
| ELL2                 | 0.35  | 6.70E-02 | 0.43  | 2.62E-02 |
| METTL15P1            | -0.19 | 3.34E-01 | -0.43 | 2.62E-02 |
| PCGF2                | 0.03  | 8.95E-01 | 0.43  | 2.62E-02 |
| SLC18A2              | -0.14 | 4.71E-01 | -0.43 | 2.62E-02 |
| CHN2                 | -0.40 | 3.47E-02 | -0.43 | 2.63E-02 |
| BRD8                 | -0.06 | 7.61E-01 | 0.43  | 2.63E-02 |
| PGBD5                | 0.38  | 4.78E-02 | 0.43  | 2.63E-02 |
| CDH17                | -0.03 | 8.98E-01 | -0.43 | 2.64E-02 |
| PRKCQ-AS1            | 0.35  | 6.75E-02 | 0.43  | 2.64E-02 |
| SH3PXD2A-AS1         | 0.32  | 9.50E-02 | 0.43  | 2.64E-02 |
| CLDN16               | -0.24 | 2.23E-01 | -0.43 | 2.66E-02 |
| MAF                  | -0.02 | 9.24E-01 | 0.43  | 2.66E-02 |
| PSG4                 | 0.12  | 5.47E-01 | -0.43 | 2.66E-02 |
| <b>RP11-316M21.7</b> | 0.18  | 3.57E-01 | -0.43 | 2.66E-02 |
| ANGEL1               | 0.33  | 8.95E-02 | 0.43  | 2.67E-02 |
| BTBD16               | -0.26 | 1.89E-01 | -0.43 | 2.67E-02 |
| PAPL                 | 0.40  | 3.72E-02 | 0.43  | 2.67E-02 |
| POU1F1               | 0.03  | 8.61E-01 | -0.43 | 2.68E-02 |
| CC2D1B               | 0.20  | 3.17E-01 | 0.43  | 2.69E-02 |
| PIK3IP1              | 0.11  | 5.69E-01 | 0.43  | 2.69E-02 |
| DCT                  | -0.23 | 2.38E-01 | -0.43 | 2.69E-02 |
| <b>RP11-413H22.3</b> | -0.21 | 2.78E-01 | -0.43 | 2.69E-02 |
| ADGRG7               | -0.24 | 2.15E-01 | -0.43 | 2.70E-02 |
| ASIP                 | 0.14  | 4.79E-01 | -0.43 | 2.70E-02 |
| CYP4F8               | -0.06 | 7.45E-01 | -0.43 | 2.70E-02 |
| HNRNPCP7             | -0.17 | 3.77E-01 | -0.43 | 2.70E-02 |
| <b>RP11-659E9.2</b>  | -0.13 | 4.96E-01 | 0.43  | 2.70E-02 |
| AHCTF1               | -0.03 | 8.91E-01 | -0.42 | 2.72E-02 |
| KATNAL1              | -0.42 | 2.44E-02 | -0.42 | 2.72E-02 |
| RPP25L               | 0.20  | 3.14E-01 | 0.42  | 2.72E-02 |
| CCDC102A             | -0.01 | 9.40E-01 | 0.42  | 2.73E-02 |
| IGKV1-5              | 0.28  | 1.48E-01 | 0.42  | 2.73E-02 |
| RPEP3                | 0.13  | 5.05E-01 | -0.42 | 2.73E-02 |
| TP53I3               | 0.22  | 2.50E-01 | 0.42  | 2.73E-02 |
| ZNF140               | -0.15 | 4.59E-01 | -0.42 | 2.73E-02 |
| ATP13A4-AS1          | 0.14  | 4.77E-01 | -0.42 | 2.74E-02 |



|               |       |          |       |          |
|---------------|-------|----------|-------|----------|
| G25097        | -0.31 | 1.13E-01 | -0.42 | 2.74E-02 |
| CACNB4        | 0.29  | 1.29E-01 | 0.42  | 2.74E-02 |
| MPI           | 0.45  | 1.59E-02 | 0.42  | 2.74E-02 |
| UBALD1        | -0.23 | 2.33E-01 | 0.42  | 2.74E-02 |
| CNGB1         | 0.09  | 6.57E-01 | 0.42  | 2.75E-02 |
| FAIM2         | 0.18  | 3.50E-01 | 0.42  | 2.75E-02 |
| RASSF10       | 0.25  | 1.97E-01 | 0.42  | 2.75E-02 |
| RP11-490N5.3  | -0.06 | 7.68E-01 | -0.42 | 2.77E-02 |
| TTC22         | 0.36  | 5.90E-02 | 0.42  | 2.77E-02 |
| BTG1          | 0.24  | 2.16E-01 | 0.42  | 2.78E-02 |
| NUDT10        | -0.20 | 3.02E-01 | -0.42 | 2.78E-02 |
| RP11-122A21.2 | 0.22  | 2.63E-01 | -0.42 | 2.78E-02 |
| EHBP1L1       | 0.32  | 9.81E-02 | 0.42  | 2.79E-02 |
| HACL1         | -0.15 | 4.34E-01 | -0.42 | 2.79E-02 |
| LRFN3         | 0.15  | 4.55E-01 | 0.42  | 2.79E-02 |
| RFX2          | -0.38 | 4.51E-02 | -0.42 | 2.79E-02 |
| RNU6-1011P    | -0.02 | 9.38E-01 | -0.42 | 2.79E-02 |
| RP11-11N5.1   | 0.03  | 8.98E-01 | 0.42  | 2.79E-02 |
| RP11-557H15.3 | 0.32  | 1.01E-01 | 0.42  | 2.79E-02 |
| SH3RF3-AS1    | 0.22  | 2.67E-01 | 0.42  | 2.79E-02 |
| TMPRSS11D     | 0.28  | 1.44E-01 | 0.42  | 2.79E-02 |
| PAPD5         | 0.04  | 8.59E-01 | -0.42 | 2.80E-02 |
| PGF           | 0.06  | 7.63E-01 | 0.42  | 2.80E-02 |
| RBM11         | -0.02 | 9.20E-01 | -0.42 | 2.80E-02 |
| SEPN1         | 0.33  | 8.78E-02 | 0.42  | 2.80E-02 |
| TMEM133       | -0.23 | 2.46E-01 | -0.42 | 2.80E-02 |
| UIMC1         | 0.05  | 8.14E-01 | 0.42  | 2.80E-02 |
| LLNLR-285B5.1 | -0.24 | 2.22E-01 | -0.42 | 2.82E-02 |
| NR1D2         | -0.21 | 2.87E-01 | -0.42 | 2.82E-02 |
| RP11-22A3.2   | 0.18  | 3.55E-01 | -0.42 | 2.82E-02 |
| U2SURP        | 0.00  | 9.92E-01 | -0.42 | 2.82E-02 |
| FNIP1         | -0.27 | 1.66E-01 | -0.42 | 2.83E-02 |
| RAD17P1       | 0.04  | 8.53E-01 | -0.42 | 2.83E-02 |
| ZIK1          | -0.14 | 4.65E-01 | -0.42 | 2.83E-02 |
| ZNF799        | -0.26 | 1.80E-01 | -0.42 | 2.83E-02 |
| CTD-2330K9.2  | 0.22  | 2.57E-01 | 0.42  | 2.84E-02 |
| EDNRA         | 0.06  | 7.79E-01 | 0.42  | 2.84E-02 |
| HARS2         | 0.15  | 4.43E-01 | 0.42  | 2.84E-02 |
| KIRREL        | 0.19  | 3.41E-01 | 0.42  | 2.84E-02 |
| LGI3          | -0.37 | 5.20E-02 | -0.42 | 2.84E-02 |
| MIR4458HG     | 0.19  | 3.39E-01 | 0.42  | 2.84E-02 |
| RP11-159D12.8 | 0.07  | 7.20E-01 | -0.42 | 2.84E-02 |
| CTA-797E19.1  | -0.18 | 3.46E-01 | 0.42  | 2.85E-02 |
| DUOXA1        | 0.16  | 4.08E-01 | 0.42  | 2.85E-02 |
| KRR1          | 0.11  | 5.66E-01 | -0.42 | 2.85E-02 |
| AC007966.1    | 0.03  | 8.93E-01 | -0.42 | 2.87E-02 |
| EVI5          | -0.04 | 8.51E-01 | -0.42 | 2.87E-02 |

|                |       |          |       |          |
|----------------|-------|----------|-------|----------|
| PTGER2         | -0.03 | 8.81E-01 | -0.42 | 2.87E-02 |
| WFS1           | -0.17 | 3.91E-01 | -0.42 | 2.87E-02 |
| CASD1          | 0.33  | 9.01E-02 | -0.42 | 2.88E-02 |
| NIT1           | 0.17  | 3.88E-01 | 0.42  | 2.88E-02 |
| OR2A20P        | 0.11  | 5.67E-01 | -0.42 | 2.88E-02 |
| OSBPL8         | -0.07 | 7.30E-01 | -0.42 | 2.88E-02 |
| RAB3IP         | -0.05 | 7.85E-01 | -0.42 | 2.88E-02 |
| ULK4P2         | -0.24 | 2.14E-01 | -0.42 | 2.88E-02 |
| XLOC_007686    | 0.20  | 3.08E-01 | 0.42  | 2.88E-02 |
| G5173          | 0.03  | 8.82E-01 | 0.42  | 2.89E-02 |
| PACS1          | 0.19  | 3.24E-01 | 0.42  | 2.89E-02 |
| PARP9          | 0.33  | 8.62E-02 | 0.42  | 2.89E-02 |
| RP11-829H16.3  | 0.04  | 8.25E-01 | -0.42 | 2.89E-02 |
| C6orf223       | 0.20  | 2.99E-01 | 0.42  | 2.91E-02 |
| TYMP           | 0.31  | 1.13E-01 | 0.42  | 2.91E-02 |
| RP11-408H1.3   | 0.14  | 4.79E-01 | 0.42  | 2.92E-02 |
| SYT8           | -0.34 | 7.87E-02 | -0.42 | 2.92E-02 |
| C15orf59-AS1   | -0.32 | 1.00E-01 | -0.42 | 2.93E-02 |
| GALNT10        | 0.32  | 9.47E-02 | 0.42  | 2.93E-02 |
| IL13RA2        | -0.15 | 4.50E-01 | 0.42  | 2.93E-02 |
| TTC4           | 0.16  | 4.29E-01 | 0.42  | 2.93E-02 |
| VWF            | 0.34  | 7.32E-02 | 0.42  | 2.93E-02 |
| PEX1           | -0.26 | 1.90E-01 | -0.42 | 2.94E-02 |
| SCD5           | -0.19 | 3.44E-01 | -0.42 | 2.94E-02 |
| ABCG1          | 0.35  | 6.75E-02 | 0.42  | 2.94E-02 |
| MEFV           | 0.32  | 1.02E-01 | 0.42  | 2.94E-02 |
| RP11-1277A3.3  | 0.16  | 4.19E-01 | 0.42  | 2.94E-02 |
| TRIP10         | 0.02  | 9.16E-01 | 0.42  | 2.94E-02 |
| PROB1          | 0.20  | 2.96E-01 | 0.42  | 2.96E-02 |
| ZNF662         | 0.24  | 2.14E-01 | 0.42  | 2.96E-02 |
| CDAN1          | -0.02 | 9.20E-01 | 0.42  | 2.97E-02 |
| FZD10          | -0.05 | 8.03E-01 | 0.42  | 2.97E-02 |
| G32779         | 0.19  | 3.21E-01 | 0.42  | 2.97E-02 |
| NFATC2IP       | 0.05  | 7.98E-01 | 0.42  | 2.97E-02 |
| RP11-383I23.2  | -0.23 | 2.33E-01 | 0.42  | 2.97E-02 |
| XLOC_002973    | -0.28 | 1.53E-01 | -0.42 | 2.97E-02 |
| ADAT1          | 0.20  | 3.17E-01 | 0.42  | 2.98E-02 |
| DOCK7          | 0.07  | 7.14E-01 | -0.42 | 2.98E-02 |
| ALDH3B1        | 0.11  | 5.74E-01 | 0.42  | 3.00E-02 |
| AZI2           | 0.26  | 1.76E-01 | 0.42  | 3.00E-02 |
| ELMO2          | 0.10  | 5.95E-01 | 0.42  | 3.00E-02 |
| OTOP2          | -0.10 | 6.09E-01 | -0.42 | 3.00E-02 |
| SHROOM1        | 0.14  | 4.66E-01 | 0.42  | 3.00E-02 |
| snoU109        | -0.12 | 5.32E-01 | -0.42 | 3.00E-02 |
| ACAD11         | -0.60 | 6.66E-04 | -0.42 | 3.01E-02 |
| CTD-2192J16.20 | 0.15  | 4.33E-01 | 0.42  | 3.01E-02 |
| GBA2           | 0.31  | 1.14E-01 | 0.42  | 3.01E-02 |

|                      |       |          |       |          |
|----------------------|-------|----------|-------|----------|
| <b>KHNYN</b>         | 0.13  | 5.00E-01 | 0.42  | 3.01E-02 |
| <b>MAGOH2P</b>       | -0.05 | 8.03E-01 | -0.42 | 3.01E-02 |
| <b>RASAL3</b>        | 0.30  | 1.22E-01 | 0.42  | 3.01E-02 |
| <b>RP11-187A9.3</b>  | 0.20  | 2.99E-01 | 0.42  | 3.01E-02 |
| <b>SRP14-AS1</b>     | -0.16 | 4.12E-01 | 0.42  | 3.01E-02 |
| <b>TUBE1</b>         | -0.31 | 1.08E-01 | -0.42 | 3.01E-02 |
| <b>CLCN7</b>         | 0.19  | 3.28E-01 | 0.42  | 3.02E-02 |
| <b>GAL</b>           | -0.08 | 6.99E-01 | -0.42 | 3.02E-02 |
| <b>RP11-379F4.7</b>  | -0.19 | 3.23E-01 | -0.42 | 3.02E-02 |
| <b>SRC</b>           | 0.35  | 6.52E-02 | 0.42  | 3.02E-02 |
| <b>STEAP2-AS1</b>    | 0.13  | 5.01E-01 | -0.42 | 3.02E-02 |
| <b>WNT9B</b>         | 0.19  | 3.21E-01 | 0.42  | 3.02E-02 |
| <b>C2orf49</b>       | -0.26 | 1.84E-01 | -0.42 | 3.04E-02 |
| <b>CNTNAP2</b>       | 0.42  | 2.63E-02 | 0.42  | 3.04E-02 |
| <b>DTX4</b>          | -0.11 | 5.63E-01 | -0.42 | 3.04E-02 |
| <b>HMGB3P8</b>       | 0.01  | 9.57E-01 | -0.42 | 3.04E-02 |
| <b>UNC13A</b>        | 0.11  | 5.82E-01 | 0.42  | 3.04E-02 |
| <b>AC093388.3</b>    | -0.06 | 7.63E-01 | -0.42 | 3.05E-02 |
| <b>AC097523.1</b>    | 0.04  | 8.24E-01 | 0.42  | 3.05E-02 |
| <b>2-Mar</b>         | -0.33 | 8.70E-02 | -0.42 | 3.05E-02 |
| <b>PARP8</b>         | 0.23  | 2.33E-01 | 0.42  | 3.05E-02 |
| <b>RP3-475N16.1</b>  | 0.03  | 8.95E-01 | -0.42 | 3.05E-02 |
| <b>SNORA73B</b>      | 0.13  | 5.24E-01 | 0.42  | 3.05E-02 |
| <b>SREBF1</b>        | 0.30  | 1.17E-01 | 0.42  | 3.05E-02 |
| <b>IDNK</b>          | -0.09 | 6.35E-01 | 0.42  | 3.06E-02 |
| <b>LRRC20</b>        | 0.14  | 4.68E-01 | 0.42  | 3.06E-02 |
| <b>B9D1</b>          | -0.19 | 3.24E-01 | -0.42 | 3.08E-02 |
| <b>FBXO45</b>        | 0.34  | 7.56E-02 | 0.42  | 3.08E-02 |
| <b>NARSP2</b>        | -0.04 | 8.57E-01 | -0.42 | 3.08E-02 |
| <b>KRT77</b>         | -0.26 | 1.81E-01 | -0.42 | 3.09E-02 |
| <b>MAP4K5</b>        | 0.11  | 5.68E-01 | -0.42 | 3.09E-02 |
| <b>SNORA74</b>       | -0.09 | 6.63E-01 | 0.42  | 3.09E-02 |
| <b>USP18</b>         | 0.35  | 7.12E-02 | 0.42  | 3.09E-02 |
| <b>C9orf85</b>       | 0.12  | 5.37E-01 | 0.42  | 3.10E-02 |
| <b>LINC01123</b>     | 0.25  | 2.02E-01 | 0.42  | 3.10E-02 |
| <b>MICD</b>          | 0.18  | 3.46E-01 | 0.42  | 3.10E-02 |
| <b>RNF149</b>        | 0.51  | 6.05E-03 | 0.42  | 3.10E-02 |
| <b>SPRY4</b>         | 0.39  | 4.26E-02 | 0.42  | 3.10E-02 |
| <b>CEP72</b>         | -0.12 | 5.38E-01 | -0.42 | 3.10E-02 |
| <b>ABHD14A</b>       | -0.06 | 7.48E-01 | 0.42  | 3.12E-02 |
| <b>C10orf107</b>     | -0.12 | 5.55E-01 | 0.42  | 3.12E-02 |
| <b>EPHA5</b>         | -0.43 | 2.33E-02 | -0.42 | 3.12E-02 |
| <b>NMNAT1</b>        | 0.07  | 7.28E-01 | 0.42  | 3.12E-02 |
| <b>PLA2G2F</b>       | 0.44  | 1.86E-02 | 0.42  | 3.12E-02 |
| <b>RNU7-70P</b>      | 0.23  | 2.47E-01 | -0.42 | 3.12E-02 |
| <b>RP11-927P21.1</b> | -0.19 | 3.26E-01 | -0.42 | 3.12E-02 |
| <b>RP3-413H6.2</b>   | -0.08 | 6.95E-01 | -0.42 | 3.12E-02 |

|                       |       |          |       |          |
|-----------------------|-------|----------|-------|----------|
| <b>TNFRSF10B</b>      | 0.21  | 2.83E-01 | 0.42  | 3.12E-02 |
| <b>CTC-232P5.3</b>    | -0.29 | 1.38E-01 | -0.42 | 3.13E-02 |
| <b>MKLN1</b>          | -0.10 | 6.25E-01 | -0.42 | 3.13E-02 |
| <b>NUPR1L</b>         | 0.02  | 9.00E-01 | -0.42 | 3.13E-02 |
| <b>PLA2G4D</b>        | 0.42  | 2.51E-02 | 0.42  | 3.13E-02 |
| <b>SLC35F1</b>        | 0.08  | 7.02E-01 | -0.42 | 3.13E-02 |
| <b>ANGPTL6</b>        | -0.28 | 1.51E-01 | 0.41  | 3.15E-02 |
| <b>CCDC64B</b>        | 0.16  | 4.05E-01 | 0.41  | 3.15E-02 |
| <b>DYSF</b>           | -0.07 | 7.37E-01 | 0.41  | 3.15E-02 |
| <b>G34070</b>         | -0.21 | 2.93E-01 | -0.41 | 3.15E-02 |
| <b>KRT34</b>          | 0.02  | 9.00E-01 | 0.41  | 3.15E-02 |
| <b>MRPS6P2</b>        | 0.05  | 8.10E-01 | -0.41 | 3.15E-02 |
| <b>NLGN4Y</b>         | 0.25  | 1.93E-01 | 0.41  | 3.15E-02 |
| <b>ST20</b>           | -0.03 | 8.74E-01 | -0.41 | 3.15E-02 |
| <b>ZNF876P</b>        | -0.25 | 2.08E-01 | -0.41 | 3.15E-02 |
| <b>ARAP3</b>          | 0.03  | 8.78E-01 | 0.41  | 3.16E-02 |
| <b>B3GNT4</b>         | -0.03 | 8.85E-01 | 0.41  | 3.16E-02 |
| <b>BARX2</b>          | 0.13  | 5.09E-01 | -0.41 | 3.16E-02 |
| <b>COL12A1</b>        | -0.05 | 8.09E-01 | 0.41  | 3.16E-02 |
| <b>MGC32805</b>       | -0.04 | 8.30E-01 | 0.41  | 3.16E-02 |
| <b>RP11-513M16.8</b>  | -0.38 | 4.66E-02 | -0.41 | 3.16E-02 |
| <b>TCAM1P</b>         | -0.15 | 4.51E-01 | -0.41 | 3.16E-02 |
| <b>AC006262.11</b>    | 0.01  | 9.64E-01 | -0.41 | 3.17E-02 |
| <b>MIR103A1</b>       | -0.17 | 3.78E-01 | -0.41 | 3.17E-02 |
| <b>RP11-747H12.3</b>  | 0.28  | 1.52E-01 | -0.41 | 3.17E-02 |
| <b>ZBTB40-IT1</b>     | -0.09 | 6.51E-01 | -0.41 | 3.17E-02 |
| <b>ABCA1</b>          | 0.15  | 4.39E-01 | 0.41  | 3.17E-02 |
| <b>G43605</b>         | 0.33  | 8.29E-02 | 0.41  | 3.17E-02 |
| <b>DDI1</b>           | -0.09 | 6.34E-01 | -0.41 | 3.19E-02 |
| <b>RP11-111J6.2</b>   | -0.01 | 9.74E-01 | -0.41 | 3.19E-02 |
| <b>SLC24A3</b>        | 0.37  | 5.03E-02 | 0.41  | 3.19E-02 |
| <b>G34162</b>         | 0.22  | 2.62E-01 | 0.41  | 3.20E-02 |
| <b>KIAA0922</b>       | -0.17 | 3.73E-01 | 0.41  | 3.20E-02 |
| <b>RNA5SP282</b>      | 0.07  | 7.20E-01 | 0.41  | 3.20E-02 |
| <b>TMEM120A</b>       | -0.06 | 7.67E-01 | 0.41  | 3.20E-02 |
| <b>AC090587.5</b>     | 0.10  | 6.07E-01 | -0.41 | 3.21E-02 |
| <b>CFAP61</b>         | -0.01 | 9.79E-01 | 0.41  | 3.21E-02 |
| <b>HCP5</b>           | 0.14  | 4.73E-01 | 0.41  | 3.21E-02 |
| <b>PITPNA</b>         | 0.36  | 6.24E-02 | 0.41  | 3.21E-02 |
| <b>RP11-1029M24.4</b> | -0.25 | 2.08E-01 | 0.41  | 3.21E-02 |
| <b>RP11-456H18.2</b>  | -0.29 | 1.38E-01 | -0.41 | 3.21E-02 |
| <b>RP11-5809.2</b>    | 0.03  | 8.83E-01 | -0.41 | 3.21E-02 |
| <b>RSPH3</b>          | 0.13  | 4.96E-01 | 0.41  | 3.21E-02 |
| <b>TMEM204</b>        | -0.16 | 4.04E-01 | 0.41  | 3.21E-02 |
| <b>USP9Y</b>          | 0.30  | 1.25E-01 | 0.41  | 3.21E-02 |
| <b>FAM134B</b>        | -0.27 | 1.69E-01 | -0.41 | 3.23E-02 |
| <b>MAPK14</b>         | 0.32  | 9.87E-02 | 0.41  | 3.23E-02 |

|                        |       |          |       |          |
|------------------------|-------|----------|-------|----------|
| <b>RP11-1094M14.11</b> | -0.06 | 7.79E-01 | -0.41 | 3.23E-02 |
| <b>RP11-350F16.1</b>   | -0.13 | 5.16E-01 | -0.41 | 3.23E-02 |
| <b>RP11-476B13.2</b>   | -0.44 | 1.94E-02 | -0.41 | 3.23E-02 |
| <b>THEGL</b>           | -0.11 | 5.65E-01 | -0.41 | 3.23E-02 |
| <b>ZMYM4-AS1</b>       | -0.21 | 2.83E-01 | -0.41 | 3.23E-02 |
| <b>MMP16</b>           | -0.11 | 5.63E-01 | -0.41 | 3.24E-02 |
| <b>MPP4</b>            | -0.21 | 2.78E-01 | -0.41 | 3.24E-02 |
| <b>SLC2A5</b>          | 0.25  | 1.93E-01 | 0.41  | 3.24E-02 |
| <b>SYP</b>             | -0.33 | 8.40E-02 | -0.41 | 3.24E-02 |
| <b>TMEM222</b>         | 0.40  | 3.70E-02 | 0.41  | 3.24E-02 |
| <b>TRMT1L</b>          | 0.07  | 7.36E-01 | 0.41  | 3.24E-02 |
| <b>ATP13A2</b>         | 0.31  | 1.11E-01 | 0.41  | 3.26E-02 |
| <b>GS1-39E22.2</b>     | -0.12 | 5.38E-01 | -0.41 | 3.26E-02 |
| <b>LINC00639</b>       | -0.22 | 2.65E-01 | 0.41  | 3.26E-02 |
| <b>TAPBP</b>           | 0.35  | 6.75E-02 | 0.41  | 3.26E-02 |
| <b>ULK3</b>            | 0.09  | 6.45E-01 | 0.41  | 3.26E-02 |
| <b>ADCK4</b>           | 0.13  | 5.18E-01 | 0.41  | 3.27E-02 |
| <b>ARL17A</b>          | 0.13  | 4.95E-01 | -0.41 | 3.27E-02 |
| <b>CLEC12B</b>         | -0.41 | 3.19E-02 | -0.41 | 3.27E-02 |
| <b>NIT2</b>            | -0.04 | 8.56E-01 | -0.41 | 3.27E-02 |
| <b>CEACAM8</b>         | -0.02 | 9.34E-01 | -0.41 | 3.29E-02 |
| <b>JAG2</b>            | 0.11  | 5.91E-01 | 0.41  | 3.29E-02 |
| <b>KIF3A</b>           | 0.04  | 8.40E-01 | -0.41 | 3.29E-02 |
| <b>PPP2R2C</b>         | 0.44  | 2.05E-02 | 0.41  | 3.30E-02 |
| <b>LLNLR-276H7.1</b>   | -0.44 | 1.89E-02 | -0.41 | 3.30E-02 |
| <b>PHACTR3</b>         | -0.15 | 4.56E-01 | -0.41 | 3.30E-02 |
| <b>PIK3CA</b>          | 0.06  | 7.53E-01 | -0.41 | 3.30E-02 |
| <b>PTPRK</b>           | 0.14  | 4.80E-01 | -0.41 | 3.30E-02 |
| <b>RP11-1029J19.5</b>  | -0.04 | 8.31E-01 | -0.41 | 3.30E-02 |
| <b>XLOC_014122</b>     | -0.02 | 9.15E-01 | -0.41 | 3.30E-02 |
| <b>AF212831.2</b>      | -0.20 | 3.05E-01 | -0.41 | 3.31E-02 |
| <b>CDC14B</b>          | -0.02 | 9.01E-01 | 0.41  | 3.31E-02 |
| <b>FER</b>             | -0.17 | 3.90E-01 | -0.41 | 3.31E-02 |
| <b>RP11-539L10.2</b>   | -0.17 | 3.95E-01 | 0.41  | 3.31E-02 |
| <b>APOBEC3D</b>        | 0.32  | 9.90E-02 | 0.41  | 3.33E-02 |
| <b>GALNT18</b>         | 0.40  | 3.52E-02 | 0.41  | 3.33E-02 |
| <b>HTRA3</b>           | -0.03 | 8.65E-01 | 0.41  | 3.33E-02 |
| <b>PGS1</b>            | -0.13 | 5.01E-01 | 0.41  | 3.33E-02 |
| <b>RP11-467L13.4</b>   | -0.04 | 8.57E-01 | 0.41  | 3.33E-02 |
| <b>ZSCAN29</b>         | 0.13  | 5.11E-01 | 0.41  | 3.33E-02 |
| <b>NPY1R</b>           | -0.28 | 1.47E-01 | -0.41 | 3.33E-02 |
| <b>PLGLB2</b>          | -0.17 | 3.90E-01 | -0.41 | 3.33E-02 |
| <b>SLC8A1</b>          | -0.29 | 1.31E-01 | -0.41 | 3.33E-02 |
| <b>SMURF2</b>          | -0.10 | 6.07E-01 | -0.41 | 3.33E-02 |
| <b>ZFX-AS1</b>         | -0.39 | 4.03E-02 | -0.41 | 3.33E-02 |
| <b>CNOT3</b>           | -0.13 | 5.16E-01 | 0.41  | 3.34E-02 |
| <b>HACD4</b>           | -0.19 | 3.29E-01 | -0.41 | 3.34E-02 |

|                       |       |          |       |          |
|-----------------------|-------|----------|-------|----------|
| <b>PTENP1</b>         | 0.07  | 7.26E-01 | 0.41  | 3.34E-02 |
| <b>RNF128</b>         | -0.35 | 7.03E-02 | -0.41 | 3.34E-02 |
| <b>RP11-347C18.3</b>  | 0.02  | 9.39E-01 | -0.41 | 3.34E-02 |
| <b>EML5</b>           | -0.36 | 6.35E-02 | -0.41 | 3.36E-02 |
| <b>G12287</b>         | 0.18  | 3.53E-01 | -0.41 | 3.36E-02 |
| <b>LRRFIP2</b>        | -0.17 | 3.83E-01 | -0.41 | 3.36E-02 |
| <b>RP11-644C3.1</b>   | 0.01  | 9.61E-01 | -0.41 | 3.36E-02 |
| <b>SGK3</b>           | -0.26 | 1.90E-01 | -0.41 | 3.36E-02 |
| <b>CAB39L</b>         | -0.25 | 2.06E-01 | -0.41 | 3.37E-02 |
| <b>GMIP</b>           | -0.03 | 8.74E-01 | 0.41  | 3.37E-02 |
| <b>HGD</b>            | 0.13  | 5.02E-01 | -0.41 | 3.37E-02 |
| <b>HMOX1</b>          | 0.18  | 3.46E-01 | 0.41  | 3.37E-02 |
| <b>LRRC73</b>         | 0.19  | 3.46E-01 | -0.41 | 3.37E-02 |
| <b>PCDHGA6</b>        | -0.21 | 2.83E-01 | -0.41 | 3.37E-02 |
| <b>PCSK9</b>          | 0.24  | 2.22E-01 | 0.41  | 3.37E-02 |
| <b>RP11-337C18.8</b>  | 0.25  | 1.92E-01 | -0.41 | 3.37E-02 |
| <b>DHRS1</b>          | 0.20  | 2.96E-01 | 0.41  | 3.39E-02 |
| <b>MTND5P32</b>       | -0.35 | 6.52E-02 | -0.41 | 3.39E-02 |
| <b>PCDHA11</b>        | -0.14 | 4.72E-01 | 0.41  | 3.39E-02 |
| <b>RP11-286N22.16</b> | -0.10 | 6.07E-01 | -0.41 | 3.39E-02 |
| <b>GSK3B</b>          | -0.17 | 3.97E-01 | -0.41 | 3.40E-02 |
| <b>RAB29</b>          | 0.37  | 5.38E-02 | 0.41  | 3.40E-02 |
| <b>RP11-216M21.1</b>  | 0.05  | 7.98E-01 | -0.41 | 3.40E-02 |
| <b>TIGD1</b>          | -0.15 | 4.58E-01 | -0.41 | 3.40E-02 |
| <b>ZNF720</b>         | -0.20 | 3.08E-01 | -0.41 | 3.40E-02 |
| <b>FLJ20021</b>       | 0.34  | 7.46E-02 | 0.41  | 3.42E-02 |
| <b>MTRNR2L12</b>      | 0.23  | 2.36E-01 | -0.41 | 3.42E-02 |
| <b>SEMA6B</b>         | 0.07  | 7.13E-01 | 0.41  | 3.42E-02 |
| <b>AC005062.2</b>     | -0.41 | 3.09E-02 | -0.41 | 3.43E-02 |
| <b>GSDMD</b>          | -0.01 | 9.75E-01 | 0.41  | 3.43E-02 |
| <b>NEDD9</b>          | -0.15 | 4.46E-01 | -0.41 | 3.43E-02 |
| <b>NHLH2</b>          | -0.13 | 5.16E-01 | -0.41 | 3.43E-02 |
| <b>NIFK-AS1</b>       | 0.14  | 4.67E-01 | 0.41  | 3.43E-02 |
| <b>PAX8-AS1</b>       | 0.11  | 5.92E-01 | -0.41 | 3.43E-02 |
| <b>RP11-467P9.1</b>   | -0.22 | 2.61E-01 | -0.41 | 3.43E-02 |
| <b>SHISA4</b>         | -0.04 | 8.50E-01 | -0.41 | 3.43E-02 |
| <b>VDAC1P11</b>       | -0.01 | 9.60E-01 | -0.41 | 3.43E-02 |
| <b>UBE2Q1-AS1</b>     | -0.25 | 2.05E-01 | -0.41 | 3.45E-02 |
| <b>ZNF649</b>         | 0.04  | 8.36E-01 | -0.41 | 3.45E-02 |
| <b>AC005229.1</b>     | -0.02 | 9.32E-01 | 0.41  | 3.46E-02 |
| <b>APOL6</b>          | 0.30  | 1.16E-01 | 0.41  | 3.46E-02 |
| <b>ARFRP1</b>         | 0.30  | 1.16E-01 | 0.41  | 3.46E-02 |
| <b>ATP8B5P</b>        | -0.07 | 7.21E-01 | 0.41  | 3.46E-02 |
| <b>CTD-2227C6.2</b>   | -0.14 | 4.63E-01 | -0.41 | 3.46E-02 |
| <b>FAM107B</b>        | -0.33 | 8.48E-02 | -0.41 | 3.46E-02 |
| <b>FBXO9</b>          | 0.40  | 3.51E-02 | 0.41  | 3.46E-02 |
| <b>NEXN-AS1</b>       | -0.31 | 1.06E-01 | 0.41  | 3.46E-02 |

|               |       |          |       |          |
|---------------|-------|----------|-------|----------|
| QSOX1         | 0.33  | 8.59E-02 | 0.41  | 3.46E-02 |
| THRSP         | 0.00  | 9.98E-01 | -0.41 | 3.46E-02 |
| FAM134C       | 0.21  | 2.78E-01 | 0.41  | 3.47E-02 |
| FBXO6         | 0.34  | 7.27E-02 | 0.41  | 3.47E-02 |
| G2582         | -0.04 | 8.29E-01 | -0.41 | 3.47E-02 |
| TXK           | -0.18 | 3.63E-01 | -0.41 | 3.47E-02 |
| GLRB          | -0.28 | 1.42E-01 | -0.41 | 3.49E-02 |
| MYO3A         | -0.35 | 6.50E-02 | -0.41 | 3.49E-02 |
| RP11-218F10.3 | -0.16 | 4.24E-01 | -0.41 | 3.49E-02 |
| UBE3A         | -0.03 | 8.81E-01 | -0.41 | 3.49E-02 |
| ADAD2         | -0.18 | 3.57E-01 | -0.41 | 3.50E-02 |
| PMS2CL        | -0.14 | 4.72E-01 | -0.41 | 3.50E-02 |
| RP11-517B11.7 | 0.10  | 6.31E-01 | -0.41 | 3.50E-02 |
| SNCG          | -0.33 | 8.29E-02 | -0.41 | 3.50E-02 |
| FAM160B2      | 0.13  | 5.19E-01 | 0.41  | 3.50E-02 |
| RP11-150O12.2 | 0.12  | 5.29E-01 | 0.41  | 3.50E-02 |
| G25046        | -0.04 | 8.31E-01 | -0.41 | 3.52E-02 |
| G35258        | -0.13 | 5.01E-01 | -0.41 | 3.52E-02 |
| RP11-15N24.4  | -0.03 | 8.71E-01 | -0.41 | 3.52E-02 |
| DISP2         | 0.16  | 4.14E-01 | 0.41  | 3.52E-02 |
| RAC2          | 0.40  | 3.56E-02 | 0.41  | 3.52E-02 |
| RP11-285E9.6  | -0.23 | 2.39E-01 | 0.41  | 3.52E-02 |
| ZFY           | 0.29  | 1.34E-01 | 0.41  | 3.52E-02 |
| ITPKA         | -0.17 | 3.91E-01 | -0.41 | 3.54E-02 |
| RP11-77E14.2  | 0.01  | 9.66E-01 | -0.41 | 3.54E-02 |
| CHST8         | -0.02 | 9.23E-01 | -0.41 | 3.55E-02 |
| GPR179        | -0.14 | 4.74E-01 | -0.41 | 3.55E-02 |
| GTPBP2        | 0.21  | 2.81E-01 | 0.41  | 3.55E-02 |
| RANP3         | -0.10 | 6.15E-01 | -0.41 | 3.55E-02 |
| RP11-879F14.2 | 0.07  | 7.19E-01 | 0.41  | 3.55E-02 |
| IYD           | -0.01 | 9.64E-01 | -0.41 | 3.57E-02 |
| OAS1          | 0.30  | 1.17E-01 | 0.41  | 3.57E-02 |
| OGFR          | 0.38  | 4.85E-02 | 0.41  | 3.57E-02 |
| RGS6          | -0.24 | 2.11E-01 | -0.41 | 3.57E-02 |
| WDR17         | -0.24 | 2.10E-01 | -0.41 | 3.57E-02 |
| EOGT          | 0.37  | 5.29E-02 | 0.41  | 3.58E-02 |
| KDM5C-IT1     | -0.02 | 9.22E-01 | -0.41 | 3.58E-02 |
| MYO1G         | 0.31  | 1.12E-01 | 0.41  | 3.58E-02 |
| RP11-70F11.7  | 0.03  | 8.86E-01 | 0.41  | 3.58E-02 |
| ALS2          | -0.18 | 3.58E-01 | -0.41 | 3.60E-02 |
| CACNA1B       | -0.17 | 3.95E-01 | -0.41 | 3.60E-02 |
| IL12A-AS1     | -0.09 | 6.52E-01 | -0.41 | 3.60E-02 |
| RP11-478C6.6  | -0.19 | 3.29E-01 | -0.41 | 3.60E-02 |
| RPS10P3       | -0.12 | 5.58E-01 | 0.41  | 3.60E-02 |
| SERPINA12     | -0.18 | 3.61E-01 | -0.41 | 3.60E-02 |
| THOC6         | 0.24  | 2.21E-01 | 0.41  | 3.60E-02 |
| TIA1          | 0.01  | 9.75E-01 | -0.41 | 3.60E-02 |

|               |       |          |       |          |
|---------------|-------|----------|-------|----------|
| CTSLP1        | -0.08 | 6.94E-01 | -0.41 | 3.61E-02 |
| DYNC1I1       | -0.17 | 3.79E-01 | -0.41 | 3.61E-02 |
| RP11-368L12.1 | -0.09 | 6.38E-01 | -0.41 | 3.61E-02 |
| TTC12         | -0.10 | 6.15E-01 | -0.41 | 3.61E-02 |
| AC010243.1    | 0.06  | 7.66E-01 | -0.40 | 3.63E-02 |
| AC079804.1    | -0.03 | 8.74E-01 | -0.40 | 3.63E-02 |
| AC094019.4    | 0.07  | 7.07E-01 | -0.40 | 3.63E-02 |
| BEX4          | -0.26 | 1.86E-01 | -0.40 | 3.63E-02 |
| BFSP2         | 0.20  | 3.15E-01 | 0.40  | 3.63E-02 |
| CNKS1         | -0.03 | 8.97E-01 | 0.40  | 3.63E-02 |
| POLR3F        | -0.06 | 7.69E-01 | -0.40 | 3.63E-02 |
| TAB1          | 0.30  | 1.25E-01 | 0.40  | 3.63E-02 |
| TRIM25        | 0.22  | 2.53E-01 | 0.40  | 3.63E-02 |
| USP40         | 0.09  | 6.35E-01 | 0.40  | 3.63E-02 |
| CREB1         | -0.11 | 5.76E-01 | -0.40 | 3.64E-02 |
| FABP7         | 0.05  | 8.09E-01 | -0.40 | 3.64E-02 |
| SNORD116-24   | 0.19  | 3.26E-01 | -0.40 | 3.64E-02 |
| ATG2A         | 0.35  | 6.70E-02 | 0.40  | 3.64E-02 |
| CKMT2-AS1     | 0.13  | 5.06E-01 | 0.40  | 3.64E-02 |
| CYP27C1       | 0.35  | 6.39E-02 | 0.40  | 3.64E-02 |
| NSUN4         | 0.20  | 3.17E-01 | 0.40  | 3.64E-02 |
| ZNF346        | 0.39  | 3.79E-02 | 0.40  | 3.64E-02 |
| APOBR         | -0.14 | 4.86E-01 | 0.40  | 3.66E-02 |
| HCAR3         | 0.03  | 8.83E-01 | 0.40  | 3.66E-02 |
| HRH2          | 0.20  | 3.02E-01 | 0.40  | 3.66E-02 |
| AC093901.1    | -0.07 | 7.31E-01 | -0.40 | 3.66E-02 |
| C16orf52      | 0.00  | 9.91E-01 | -0.40 | 3.66E-02 |
| RP13-554M15.5 | -0.34 | 7.72E-02 | -0.40 | 3.66E-02 |
| TIPARP-AS1    | -0.31 | 1.13E-01 | -0.40 | 3.66E-02 |
| TRIT1         | -0.18 | 3.60E-01 | -0.40 | 3.66E-02 |
| ZCCHC14       | -0.12 | 5.44E-01 | -0.40 | 3.66E-02 |
| AC090587.4    | 0.13  | 5.13E-01 | 0.40  | 3.67E-02 |
| ARRDC1        | 0.25  | 2.03E-01 | 0.40  | 3.67E-02 |
| ASPN          | -0.13 | 5.06E-01 | 0.40  | 3.67E-02 |
| EPHB3         | 0.20  | 2.98E-01 | 0.40  | 3.67E-02 |
| NAA16         | -0.22 | 2.64E-01 | -0.40 | 3.67E-02 |
| SPATA24       | 0.14  | 4.89E-01 | 0.40  | 3.67E-02 |
| AC004112.4    | 0.05  | 8.16E-01 | -0.40 | 3.69E-02 |
| BNIP3P26      | 0.01  | 9.72E-01 | -0.40 | 3.69E-02 |
| EIF4A1P2      | 0.05  | 7.96E-01 | 0.40  | 3.69E-02 |
| HSD11B1L      | 0.10  | 5.97E-01 | 0.40  | 3.69E-02 |
| KB-1507C5.3   | -0.19 | 3.33E-01 | -0.40 | 3.69E-02 |
| RP11-394B2.6  | 0.23  | 2.31E-01 | 0.40  | 3.69E-02 |
| RSPH1         | -0.29 | 1.34E-01 | -0.40 | 3.69E-02 |
| ACIN1         | -0.17 | 3.86E-01 | 0.40  | 3.70E-02 |
| ACP2          | -0.03 | 8.67E-01 | 0.40  | 3.70E-02 |
| GBAP1         | 0.33  | 8.59E-02 | 0.40  | 3.70E-02 |



|               |       |          |       |          |
|---------------|-------|----------|-------|----------|
| LRRC61        | 0.24  | 2.14E-01 | 0.40  | 3.70E-02 |
| PAICSP1       | -0.11 | 5.62E-01 | -0.40 | 3.70E-02 |
| PLEKHJ1       | 0.25  | 1.97E-01 | 0.40  | 3.70E-02 |
| RNU6-1176P    | -0.35 | 6.66E-02 | -0.40 | 3.70E-02 |
| RP11-475I24.3 | -0.45 | 1.67E-02 | -0.40 | 3.70E-02 |
| RPRML         | 0.17  | 3.90E-01 | -0.40 | 3.70E-02 |
| TRIM15        | 0.29  | 1.31E-01 | 0.40  | 3.70E-02 |
| ZNF561        | 0.08  | 6.68E-01 | 0.40  | 3.70E-02 |
| AGAP2         | 0.42  | 2.67E-02 | 0.40  | 3.72E-02 |
| G43247        | 0.19  | 3.45E-01 | 0.40  | 3.72E-02 |
| RP11-321C24.4 | 0.11  | 5.84E-01 | 0.40  | 3.72E-02 |
| ZSWIM6        | 0.27  | 1.60E-01 | 0.40  | 3.72E-02 |
| OR10A3        | -0.06 | 7.58E-01 | -0.40 | 3.74E-02 |
| PPIAP28       | -0.01 | 9.53E-01 | 0.40  | 3.74E-02 |
| SMC1B         | -0.12 | 5.37E-01 | -0.40 | 3.74E-02 |
| ZFP90         | 0.14  | 4.90E-01 | 0.40  | 3.74E-02 |
| CLDN8         | -0.12 | 5.34E-01 | -0.40 | 3.75E-02 |
| RP11-843P14.2 | -0.34 | 7.44E-02 | -0.40 | 3.75E-02 |
| ITGB5         | -0.03 | 8.75E-01 | 0.40  | 3.75E-02 |
| G34082        | -0.06 | 7.72E-01 | 0.40  | 3.77E-02 |
| STK32C        | 0.13  | 5.15E-01 | 0.40  | 3.77E-02 |
| G15649        | -0.09 | 6.35E-01 | -0.40 | 3.77E-02 |
| JPX           | -0.24 | 2.23E-01 | -0.40 | 3.77E-02 |
| ROS1          | -0.11 | 5.64E-01 | -0.40 | 3.77E-02 |
| AC009403.2    | 0.04  | 8.49E-01 | 0.40  | 3.78E-02 |
| AP5S1         | 0.41  | 2.89E-02 | 0.40  | 3.78E-02 |
| CD8BP         | -0.12 | 5.38E-01 | 0.40  | 3.78E-02 |
| FAM172A       | 0.01  | 9.48E-01 | -0.40 | 3.78E-02 |
| FGFBP3        | 0.02  | 9.01E-01 | -0.40 | 3.78E-02 |
| LRRC37A9P     | 0.08  | 6.94E-01 | -0.40 | 3.78E-02 |
| RP11-80I15.1  | -0.14 | 4.75E-01 | -0.40 | 3.78E-02 |
| SOCS1         | 0.15  | 4.60E-01 | 0.40  | 3.78E-02 |
| TEAD3         | 0.07  | 7.13E-01 | 0.40  | 3.78E-02 |
| TMEM161B      | 0.08  | 6.72E-01 | -0.40 | 3.78E-02 |
| IFI27         | 0.19  | 3.28E-01 | 0.40  | 3.80E-02 |
| IGSF21        | 0.02  | 9.00E-01 | 0.40  | 3.80E-02 |
| NAA25         | 0.12  | 5.58E-01 | -0.40 | 3.80E-02 |
| OFD1          | -0.28 | 1.53E-01 | -0.40 | 3.80E-02 |
| PARP4P1       | -0.29 | 1.41E-01 | 0.40  | 3.80E-02 |
| PIK3CD        | 0.02  | 9.00E-01 | 0.40  | 3.80E-02 |
| STRC          | 0.00  | 9.99E-01 | -0.40 | 3.80E-02 |
| RIF1          | -0.08 | 6.99E-01 | -0.40 | 3.82E-02 |
| ADGRL1        | 0.33  | 8.34E-02 | 0.40  | 3.82E-02 |
| CD70          | -0.04 | 8.30E-01 | 0.40  | 3.82E-02 |
| GPR153        | 0.26  | 1.85E-01 | 0.40  | 3.82E-02 |
| HRH3          | -0.01 | 9.71E-01 | 0.40  | 3.82E-02 |
| LINC01358     | -0.01 | 9.43E-01 | 0.40  | 3.82E-02 |

|               |       |          |       |          |
|---------------|-------|----------|-------|----------|
| POM121L9P     | 0.08  | 6.95E-01 | 0.40  | 3.82E-02 |
| RNF168        | 0.41  | 2.99E-02 | 0.40  | 3.82E-02 |
| RP11-421N8.1  | 0.23  | 2.41E-01 | 0.40  | 3.82E-02 |
| RP13-516M14.1 | 0.03  | 8.62E-01 | 0.40  | 3.82E-02 |
| TRIM10        | 0.22  | 2.57E-01 | 0.40  | 3.82E-02 |
| FAM189B       | 0.02  | 9.18E-01 | 0.40  | 3.83E-02 |
| RP13-128O4.3  | 0.32  | 9.84E-02 | 0.40  | 3.83E-02 |
| COL24A1       | -0.22 | 2.53E-01 | -0.40 | 3.83E-02 |
| FAM153C       | -0.19 | 3.32E-01 | -0.40 | 3.83E-02 |
| SSBP2         | -0.20 | 2.97E-01 | -0.40 | 3.83E-02 |
| GAB1          | 0.13  | 5.06E-01 | 0.40  | 3.85E-02 |
| GAPDHS        | 0.14  | 4.64E-01 | -0.40 | 3.85E-02 |
| PPM1A         | -0.03 | 8.97E-01 | -0.40 | 3.85E-02 |
| RPL21P54      | 0.01  | 9.76E-01 | -0.40 | 3.85E-02 |
| TMPRSS11E     | -0.14 | 4.79E-01 | -0.40 | 3.85E-02 |
| RP11-321A17.4 | -0.11 | 5.77E-01 | -0.40 | 3.86E-02 |
| CMAHP         | -0.48 | 9.51E-03 | -0.40 | 3.88E-02 |
| DCAKD         | -0.07 | 7.22E-01 | 0.40  | 3.88E-02 |
| G38513        | 0.11  | 5.76E-01 | -0.40 | 3.88E-02 |
| RP11-211N8.2  | -0.04 | 8.30E-01 | -0.40 | 3.88E-02 |
| ZNF384        | 0.16  | 4.30E-01 | 0.40  | 3.88E-02 |
| CNTFR         | -0.07 | 7.12E-01 | -0.40 | 3.90E-02 |
| PBRM1         | 0.08  | 7.02E-01 | -0.40 | 3.90E-02 |
| PMS2P1        | 0.06  | 7.61E-01 | -0.40 | 3.90E-02 |
| THUMPD2       | 0.09  | 6.64E-01 | -0.40 | 3.90E-02 |
| RN7SL730P     | 0.17  | 3.89E-01 | 0.40  | 3.90E-02 |
| G25761        | 0.19  | 3.27E-01 | -0.40 | 3.91E-02 |
| RASSF8        | -0.35 | 6.98E-02 | -0.40 | 3.91E-02 |
| RP11-16B9.1   | -0.06 | 7.46E-01 | -0.40 | 3.91E-02 |
| RP11-290F24.6 | -0.33 | 8.95E-02 | -0.40 | 3.91E-02 |
| RP11-303E16.9 | -0.11 | 5.93E-01 | -0.40 | 3.91E-02 |
| RP11-380L11.4 | 0.07  | 7.28E-01 | -0.40 | 3.91E-02 |
| RP11-89H19.2  | 0.36  | 5.90E-02 | -0.40 | 3.91E-02 |
| TENM1         | -0.55 | 2.58E-03 | -0.40 | 3.91E-02 |
| ZNF334        | 0.12  | 5.31E-01 | -0.40 | 3.91E-02 |
| ZNF790-AS1    | -0.05 | 7.85E-01 | -0.40 | 3.91E-02 |
| LINC01232     | 0.07  | 7.28E-01 | 0.40  | 3.91E-02 |
| PDLIM7        | 0.21  | 2.78E-01 | 0.40  | 3.91E-02 |
| RP4-671O14.7  | 0.05  | 7.92E-01 | 0.40  | 3.91E-02 |
| ST13P19       | -0.20 | 3.08E-01 | 0.40  | 3.91E-02 |
| AC092756.1    | 0.19  | 3.37E-01 | -0.40 | 3.93E-02 |
| CHST7         | 0.30  | 1.21E-01 | 0.40  | 3.93E-02 |
| DHX58         | 0.36  | 6.07E-02 | 0.40  | 3.93E-02 |
| G3707         | -0.16 | 4.25E-01 | -0.40 | 3.93E-02 |
| HIC2          | -0.11 | 5.75E-01 | -0.40 | 3.93E-02 |
| ITGAM         | -0.07 | 7.14E-01 | 0.40  | 3.93E-02 |
| TNMD          | -0.07 | 7.39E-01 | -0.40 | 3.93E-02 |

|               |       |          |       |          |
|---------------|-------|----------|-------|----------|
| WLS           | -0.09 | 6.35E-01 | -0.40 | 3.93E-02 |
| XYLT2         | 0.24  | 2.28E-01 | 0.40  | 3.93E-02 |
| EPO           | -0.06 | 7.64E-01 | -0.40 | 3.95E-02 |
| SUGCT         | -0.11 | 5.67E-01 | 0.40  | 3.95E-02 |
| TBX6          | -0.19 | 3.41E-01 | 0.40  | 3.95E-02 |
| ALDH3B2       | 0.10  | 6.10E-01 | 0.40  | 3.96E-02 |
| EGF           | -0.15 | 4.54E-01 | -0.40 | 3.96E-02 |
| FRAS1         | -0.01 | 9.45E-01 | -0.40 | 3.96E-02 |
| KB-1208A12.3  | 0.00  | 9.90E-01 | -0.40 | 3.96E-02 |
| LINC00648     | -0.04 | 8.27E-01 | -0.40 | 3.96E-02 |
| PPP1R26       | 0.08  | 7.04E-01 | 0.40  | 3.96E-02 |
| SMLR1         | 0.12  | 5.43E-01 | -0.40 | 3.96E-02 |
| TPPP          | -0.54 | 2.87E-03 | -0.40 | 3.96E-02 |
| KCNJ15        | 0.43  | 2.11E-02 | 0.40  | 3.98E-02 |
| HMGB3P10      | -0.34 | 7.87E-02 | -0.40 | 3.98E-02 |
| RP11-27K13.3  | 0.13  | 5.24E-01 | -0.40 | 3.98E-02 |
| DTX2          | 0.13  | 4.99E-01 | 0.40  | 4.00E-02 |
| G36605        | -0.11 | 5.90E-01 | 0.40  | 4.00E-02 |
| IFITM1        | 0.15  | 4.43E-01 | 0.40  | 4.01E-02 |
| RP11-650P15.1 | 0.30  | 1.16E-01 | -0.40 | 4.01E-02 |
| TREX2         | 0.29  | 1.40E-01 | 0.40  | 4.01E-02 |
| TTY14         | 0.29  | 1.37E-01 | 0.40  | 4.01E-02 |
| ZP1           | -0.01 | 9.60E-01 | -0.40 | 4.01E-02 |
| FMR1-IT1      | -0.10 | 6.22E-01 | 0.40  | 4.03E-02 |
| GMFG          | 0.24  | 2.11E-01 | 0.40  | 4.03E-02 |
| RNU5E-4P      | -0.11 | 5.82E-01 | 0.40  | 4.03E-02 |
| CDADC1        | -0.30 | 1.17E-01 | -0.40 | 4.05E-02 |
| G33410        | -0.07 | 7.25E-01 | -0.40 | 4.05E-02 |
| HES4          | -0.14 | 4.83E-01 | -0.40 | 4.05E-02 |
| ID1           | 0.47  | 1.08E-02 | 0.40  | 4.05E-02 |
| IP6K3         | -0.26 | 1.88E-01 | 0.40  | 4.05E-02 |
| LPL           | -0.02 | 9.23E-01 | -0.40 | 4.05E-02 |
| OGDHL         | 0.03  | 8.64E-01 | 0.40  | 4.05E-02 |
| PRDM5         | 0.13  | 5.20E-01 | -0.40 | 4.05E-02 |
| PWWP2A        | -0.13 | 5.15E-01 | 0.40  | 4.05E-02 |
| RNA5SP395     | 0.27  | 1.65E-01 | 0.40  | 4.05E-02 |
| SLC35A3       | -0.04 | 8.30E-01 | -0.40 | 4.05E-02 |
| ANKRD39       | 0.02  | 9.22E-01 | 0.40  | 4.06E-02 |
| CCDC173       | -0.31 | 1.03E-01 | -0.40 | 4.06E-02 |
| EFCC1         | 0.02  | 9.09E-01 | 0.40  | 4.06E-02 |
| F3            | -0.02 | 9.02E-01 | -0.40 | 4.06E-02 |
| RP11-1078H9.2 | -0.10 | 6.26E-01 | 0.40  | 4.06E-02 |
| RP11-159L20.2 | 0.10  | 5.98E-01 | -0.40 | 4.06E-02 |
| UG0898H09     | -0.37 | 5.27E-02 | -0.40 | 4.06E-02 |
| ALG1L8P       | -0.26 | 1.77E-01 | -0.40 | 4.08E-02 |
| AP000695.4    | 0.06  | 7.57E-01 | 0.40  | 4.08E-02 |
| CIB1          | 0.11  | 5.65E-01 | 0.40  | 4.08E-02 |

|                |       |          |       |          |
|----------------|-------|----------|-------|----------|
| NFE2           | 0.00  | 9.92E-01 | 0.40  | 4.08E-02 |
| OR7E130P       | -0.07 | 7.42E-01 | -0.40 | 4.08E-02 |
| RP11-20E24.1   | 0.32  | 9.33E-02 | 0.40  | 4.08E-02 |
| RP11-292F22.7  | 0.00  | 9.91E-01 | -0.40 | 4.08E-02 |
| RP11-2K6.1     | -0.10 | 6.30E-01 | -0.40 | 4.08E-02 |
| SNORA35        | -0.11 | 5.88E-01 | 0.40  | 4.08E-02 |
| XLOC_005515    | -0.07 | 7.33E-01 | -0.40 | 4.08E-02 |
| C2             | -0.12 | 5.48E-01 | 0.40  | 4.10E-02 |
| MIR210         | -0.31 | 1.04E-01 | 0.40  | 4.10E-02 |
| CMTM4          | -0.31 | 1.12E-01 | -0.40 | 4.10E-02 |
| GS1-279B7.1    | -0.13 | 5.20E-01 | -0.40 | 4.10E-02 |
| GSTA3          | -0.07 | 7.13E-01 | -0.40 | 4.10E-02 |
| MPC1           | 0.08  | 6.84E-01 | -0.40 | 4.10E-02 |
| bac-BPGBPG55C2 | -0.36 | 5.90E-02 | -0.40 | 4.10E-02 |
| ANKRD31        | 0.24  | 2.22E-01 | 0.40  | 4.11E-02 |
| ASNSP5         | 0.03  | 8.79E-01 | -0.40 | 4.11E-02 |
| CPXM1          | -0.12 | 5.34E-01 | 0.40  | 4.11E-02 |
| KCTD4          | 0.37  | 5.40E-02 | 0.40  | 4.11E-02 |
| MFHAS1         | 0.41  | 2.84E-02 | 0.40  | 4.11E-02 |
| RP11-395G23.3  | -0.05 | 8.19E-01 | 0.40  | 4.11E-02 |
| SLC26A3        | -0.26 | 1.77E-01 | -0.40 | 4.11E-02 |
| DGAT2L6        | -0.08 | 6.81E-01 | -0.40 | 4.13E-02 |
| LEKR1          | -0.18 | 3.66E-01 | -0.40 | 4.13E-02 |
| MITF           | -0.51 | 5.21E-03 | -0.40 | 4.13E-02 |
| SLC47A1        | 0.07  | 7.30E-01 | -0.40 | 4.13E-02 |
| TGM4           | -0.19 | 3.37E-01 | -0.40 | 4.13E-02 |
| FBXO4          | 0.24  | 2.18E-01 | 0.40  | 4.13E-02 |
| IFNGR1         | 0.34  | 7.97E-02 | 0.40  | 4.13E-02 |
| LA16c-360H6.1  | 0.25  | 2.01E-01 | 0.40  | 4.13E-02 |
| XLOC_012115    | -0.26 | 1.77E-01 | 0.40  | 4.13E-02 |
| G16040         | 0.08  | 6.80E-01 | -0.39 | 4.15E-02 |
| IL21R          | 0.11  | 5.84E-01 | 0.39  | 4.15E-02 |
| XLOC_007992    | -0.40 | 3.60E-02 | -0.39 | 4.15E-02 |
| ZDHC9          | -0.20 | 3.11E-01 | -0.39 | 4.15E-02 |
| ASB9P1         | 0.00  | 9.83E-01 | -0.39 | 4.16E-02 |
| CHRNA9         | 0.36  | 6.05E-02 | 0.39  | 4.16E-02 |
| METTL7B        | 0.09  | 6.49E-01 | -0.39 | 4.16E-02 |
| RGP1           | 0.21  | 2.72E-01 | 0.39  | 4.16E-02 |
| RP11-613F22.8  | -0.17 | 3.82E-01 | -0.39 | 4.16E-02 |
| CD274          | 0.23  | 2.43E-01 | 0.39  | 4.18E-02 |
| RNU4-68P       | 0.05  | 8.01E-01 | -0.39 | 4.18E-02 |
| RP11-64B16.4   | -0.11 | 5.92E-01 | -0.39 | 4.18E-02 |
| AP001059.7     | -0.05 | 8.00E-01 | -0.39 | 4.20E-02 |
| ASTN1          | -0.05 | 7.85E-01 | -0.39 | 4.20E-02 |
| CTC-255N20.1   | -0.23 | 2.30E-01 | -0.39 | 4.20E-02 |
| FBXO27         | 0.11  | 5.87E-01 | 0.39  | 4.20E-02 |
| G39634         | -0.09 | 6.47E-01 | 0.39  | 4.20E-02 |

|                |       |          |       |          |
|----------------|-------|----------|-------|----------|
| G39837         | 0.23  | 2.44E-01 | -0.39 | 4.20E-02 |
| GNPDA1         | 0.13  | 5.16E-01 | 0.39  | 4.20E-02 |
| KIAA1211L      | -0.16 | 4.04E-01 | -0.39 | 4.20E-02 |
| SMAD2          | 0.14  | 4.75E-01 | -0.39 | 4.20E-02 |
| KB-1958F4.1    | -0.33 | 8.29E-02 | -0.39 | 4.22E-02 |
| VASN           | 0.16  | 4.08E-01 | 0.39  | 4.22E-02 |
| AFTPH          | -0.14 | 4.82E-01 | -0.39 | 4.23E-02 |
| CTB-107G13.1   | -0.02 | 9.18E-01 | -0.39 | 4.23E-02 |
| EXOC6          | 0.16  | 4.26E-01 | -0.39 | 4.23E-02 |
| GCNT1P1        | -0.28 | 1.43E-01 | -0.39 | 4.23E-02 |
| RAB9B          | -0.05 | 7.98E-01 | -0.39 | 4.23E-02 |
| RP11-186N15.3  | 0.13  | 5.17E-01 | 0.39  | 4.23E-02 |
| RPS6KA5        | 0.18  | 3.63E-01 | -0.39 | 4.23E-02 |
| ZNF92          | -0.02 | 9.06E-01 | -0.39 | 4.23E-02 |
| ARRB1          | 0.34  | 7.51E-02 | 0.39  | 4.25E-02 |
| CLCN1          | 0.01  | 9.53E-01 | 0.39  | 4.25E-02 |
| NOCT           | 0.48  | 9.05E-03 | 0.39  | 4.25E-02 |
| AL355490.2     | 0.07  | 7.40E-01 | -0.39 | 4.25E-02 |
| ANKRD18DP      | -0.37 | 5.08E-02 | -0.39 | 4.25E-02 |
| C8orf46        | 0.01  | 9.60E-01 | -0.39 | 4.25E-02 |
| PCDHGA3        | -0.25 | 2.02E-01 | -0.39 | 4.25E-02 |
| MSRB1          | 0.23  | 2.43E-01 | 0.39  | 4.27E-02 |
| PIK3C3         | -0.15 | 4.37E-01 | -0.39 | 4.27E-02 |
| PLA2G2A        | -0.31 | 1.10E-01 | 0.39  | 4.27E-02 |
| RP11-463O9.1   | 0.15  | 4.45E-01 | -0.39 | 4.27E-02 |
| SPINK1         | 0.26  | 1.88E-01 | -0.39 | 4.27E-02 |
| TMSB15B        | -0.12 | 5.28E-01 | -0.39 | 4.27E-02 |
| STXBP3         | 0.03  | 8.98E-01 | -0.39 | 4.29E-02 |
| C6orf48        | 0.02  | 9.31E-01 | 0.39  | 4.29E-02 |
| CCK            | 0.15  | 4.41E-01 | 0.39  | 4.29E-02 |
| ABHD8          | 0.13  | 4.99E-01 | 0.39  | 4.30E-02 |
| ASPHD1         | -0.09 | 6.52E-01 | 0.39  | 4.30E-02 |
| CCDC85C        | 0.30  | 1.19E-01 | 0.39  | 4.30E-02 |
| CTC-308K20.4   | -0.04 | 8.21E-01 | 0.39  | 4.30E-02 |
| RP11-574K11.27 | 0.22  | 2.55E-01 | -0.39 | 4.30E-02 |
| SNORD73        | 0.06  | 7.66E-01 | -0.39 | 4.30E-02 |
| SPECC1         | 0.16  | 4.29E-01 | 0.39  | 4.30E-02 |
| SPIRE1         | 0.13  | 5.22E-01 | 0.39  | 4.30E-02 |
| TPRG1          | 0.01  | 9.48E-01 | -0.39 | 4.30E-02 |
| ZNFX1          | 0.23  | 2.41E-01 | 0.39  | 4.30E-02 |
| FAM210B        | 0.13  | 5.01E-01 | 0.39  | 4.32E-02 |
| G10020         | 0.01  | 9.75E-01 | 0.39  | 4.32E-02 |
| G35948         | -0.45 | 1.59E-02 | 0.39  | 4.32E-02 |
| LTB4R2         | 0.22  | 2.66E-01 | 0.39  | 4.32E-02 |
| MYOM3          | 0.23  | 2.29E-01 | 0.39  | 4.32E-02 |
| SLC6A12        | -0.26 | 1.81E-01 | 0.39  | 4.32E-02 |
| SNORA14A       | -0.13 | 5.01E-01 | 0.39  | 4.32E-02 |

|                |       |          |       |          |
|----------------|-------|----------|-------|----------|
| SP140L         | 0.23  | 2.45E-01 | 0.39  | 4.32E-02 |
| STAT5A         | 0.06  | 7.75E-01 | 0.39  | 4.32E-02 |
| ZNF549         | 0.02  | 9.06E-01 | -0.39 | 4.32E-02 |
| BRWD3          | -0.12 | 5.50E-01 | -0.39 | 4.34E-02 |
| LCA5L          | 0.01  | 9.61E-01 | -0.39 | 4.34E-02 |
| PRDX3P2        | 0.27  | 1.73E-01 | -0.39 | 4.34E-02 |
| TEKT3          | -0.27 | 1.62E-01 | -0.39 | 4.34E-02 |
| RN7SL349P      | 0.01  | 9.76E-01 | 0.39  | 4.34E-02 |
| CXCL1          | 0.29  | 1.40E-01 | 0.39  | 4.36E-02 |
| EEF1DP5        | 0.01  | 9.59E-01 | -0.39 | 4.36E-02 |
| EFCAB1         | -0.25 | 2.07E-01 | -0.39 | 4.36E-02 |
| FAM53C         | 0.51  | 6.08E-03 | 0.39  | 4.36E-02 |
| HECTD3         | -0.17 | 4.00E-01 | 0.39  | 4.36E-02 |
| NAP1L2         | -0.08 | 6.92E-01 | -0.39 | 4.36E-02 |
| PRELID2        | 0.20  | 3.10E-01 | -0.39 | 4.36E-02 |
| RP11-629N8.4   | 0.10  | 5.99E-01 | -0.39 | 4.36E-02 |
| STAT5B         | 0.05  | 8.09E-01 | 0.39  | 4.38E-02 |
| AWAT2          | -0.03 | 8.88E-01 | -0.39 | 4.38E-02 |
| TCEAL3         | -0.24 | 2.23E-01 | -0.39 | 4.38E-02 |
| GDI2P2         | -0.32 | 1.02E-01 | 0.39  | 4.39E-02 |
| ALS2CR12       | 0.05  | 8.13E-01 | -0.39 | 4.39E-02 |
| AMOT           | 0.04  | 8.33E-01 | -0.39 | 4.39E-02 |
| CRY2           | -0.31 | 1.09E-01 | -0.39 | 4.39E-02 |
| KCNH7          | -0.08 | 6.86E-01 | -0.39 | 4.39E-02 |
| RP11-344B5.2   | 0.10  | 6.10E-01 | -0.39 | 4.39E-02 |
| RP11-53I6.4    | 0.10  | 6.25E-01 | -0.39 | 4.39E-02 |
| ANKIB1         | -0.19 | 3.22E-01 | -0.39 | 4.41E-02 |
| ASPA           | -0.36 | 5.86E-02 | -0.39 | 4.41E-02 |
| DNAJC17        | 0.21  | 2.94E-01 | 0.39  | 4.41E-02 |
| HOMER3         | 0.06  | 7.62E-01 | 0.39  | 4.41E-02 |
| RP11-506M13.3  | -0.44 | 1.94E-02 | -0.39 | 4.41E-02 |
| SP6            | -0.15 | 4.56E-01 | -0.39 | 4.41E-02 |
| ZCCHC11        | -0.26 | 1.83E-01 | -0.39 | 4.41E-02 |
| MR1            | 0.23  | 2.36E-01 | 0.39  | 4.43E-02 |
| RNU6-946P      | -0.13 | 5.01E-01 | -0.39 | 4.43E-02 |
| RP11-164N3.1   | 0.16  | 4.21E-01 | -0.39 | 4.43E-02 |
| RP11-305L7.6   | 0.08  | 6.80E-01 | 0.39  | 4.43E-02 |
| C6orf99        | -0.16 | 4.13E-01 | -0.39 | 4.45E-02 |
| DLGAP1         | -0.19 | 3.20E-01 | -0.39 | 4.45E-02 |
| ARHGEF17       | -0.22 | 2.60E-01 | 0.39  | 4.45E-02 |
| HELZ2          | 0.44  | 1.93E-02 | 0.39  | 4.45E-02 |
| AC008074.3     | -0.12 | 5.43E-01 | -0.39 | 4.47E-02 |
| FAM86FP        | -0.24 | 2.28E-01 | -0.39 | 4.47E-02 |
| LINC01265      | 0.09  | 6.38E-01 | -0.39 | 4.47E-02 |
| RP11-1134I14.8 | -0.24 | 2.14E-01 | -0.39 | 4.47E-02 |
| TMF1           | -0.07 | 7.21E-01 | -0.39 | 4.47E-02 |
| ZNF213-AS1     | -0.04 | 8.41E-01 | -0.39 | 4.47E-02 |

|               |       |          |       |          |
|---------------|-------|----------|-------|----------|
| ZNF738        | -0.14 | 4.68E-01 | -0.39 | 4.47E-02 |
| SUSD5         | -0.15 | 4.61E-01 | 0.39  | 4.47E-02 |
| AC084290.2    | -0.03 | 8.86E-01 | -0.39 | 4.48E-02 |
| RP11-80A15.1  | -0.14 | 4.72E-01 | 0.39  | 4.48E-02 |
| LA16c-380H5.6 | -0.06 | 7.78E-01 | 0.39  | 4.50E-02 |
| NMI           | 0.06  | 7.55E-01 | 0.39  | 4.50E-02 |
| RP11-43D4.3   | 0.14  | 4.82E-01 | 0.39  | 4.50E-02 |
| CLCA4         | -0.20 | 2.98E-01 | -0.39 | 4.50E-02 |
| CTD-3035K23.6 | 0.22  | 2.57E-01 | -0.39 | 4.50E-02 |
| LRIT3         | 0.33  | 8.67E-02 | -0.39 | 4.50E-02 |
| LRR8C         | -0.23 | 2.37E-01 | -0.39 | 4.50E-02 |
| TMEM260       | -0.12 | 5.36E-01 | -0.39 | 4.50E-02 |
| ALX1          | -0.39 | 4.21E-02 | -0.39 | 4.52E-02 |
| C11orf54      | 0.22  | 2.70E-01 | -0.39 | 4.52E-02 |
| SIDT1         | 0.15  | 4.51E-01 | 0.39  | 4.52E-02 |
| ANKRD30A      | -0.20 | 3.14E-01 | -0.39 | 4.54E-02 |
| BIRC7         | -0.07 | 7.30E-01 | -0.39 | 4.54E-02 |
| CCDC38        | -0.39 | 4.15E-02 | -0.39 | 4.54E-02 |
| PFKFB1        | -0.02 | 9.18E-01 | 0.39  | 4.54E-02 |
| BMP1          | 0.21  | 2.93E-01 | 0.39  | 4.56E-02 |
| DARS-AS1      | 0.39  | 4.26E-02 | 0.39  | 4.56E-02 |
| RNPEPL1       | 0.10  | 6.07E-01 | 0.39  | 4.56E-02 |
| STOML1        | 0.21  | 2.79E-01 | 0.39  | 4.56E-02 |
| TBC1D10A      | 0.26  | 1.78E-01 | 0.39  | 4.56E-02 |
| LA16c-313F4.1 | 0.04  | 8.48E-01 | 0.39  | 4.58E-02 |
| PLXNB2        | -0.10 | 6.02E-01 | 0.39  | 4.58E-02 |
| SEC14L6       | 0.02  | 9.08E-01 | -0.39 | 4.58E-02 |
| TMUB2         | 0.08  | 6.97E-01 | 0.39  | 4.58E-02 |
| UBE2SP1       | 0.05  | 8.14E-01 | 0.39  | 4.58E-02 |
| CNTN4         | -0.25 | 2.09E-01 | -0.39 | 4.59E-02 |
| INMT          | 0.03  | 8.65E-01 | 0.39  | 4.59E-02 |
| LSM8          | 0.02  | 9.22E-01 | -0.39 | 4.59E-02 |
| MIR544B       | 0.13  | 5.00E-01 | -0.39 | 4.59E-02 |
| TRAM1L1       | -0.25 | 1.93E-01 | -0.39 | 4.59E-02 |
| TLR2          | 0.39  | 3.77E-02 | 0.39  | 4.61E-02 |
| TMEM140       | 0.18  | 3.60E-01 | 0.39  | 4.61E-02 |
| RP11-61L19.3  | -0.09 | 6.52E-01 | -0.39 | 4.61E-02 |
| RP5-974N19.1  | 0.28  | 1.45E-01 | -0.39 | 4.61E-02 |
| RP6-201G10.2  | -0.03 | 8.63E-01 | -0.39 | 4.61E-02 |
| CLCNKA        | -0.20 | 3.15E-01 | -0.39 | 4.63E-02 |
| MPZ           | -0.15 | 4.58E-01 | -0.39 | 4.63E-02 |
| PDK1          | 0.09  | 6.46E-01 | -0.39 | 4.63E-02 |
| RP11-134O21.1 | -0.03 | 8.76E-01 | -0.39 | 4.63E-02 |
| RP11-371E8.4  | -0.05 | 8.07E-01 | -0.39 | 4.63E-02 |
| GATB          | 0.09  | 6.40E-01 | 0.39  | 4.63E-02 |
| MESP2         | 0.16  | 4.28E-01 | 0.39  | 4.63E-02 |
| NABP1         | 0.41  | 2.95E-02 | 0.39  | 4.63E-02 |

|                      |       |          |       |          |
|----------------------|-------|----------|-------|----------|
| <b>NMRAL1</b>        | 0.34  | 7.61E-02 | 0.39  | 4.63E-02 |
| <b>BASP1</b>         | 0.13  | 5.16E-01 | 0.39  | 4.65E-02 |
| <b>CD36</b>          | 0.47  | 1.19E-02 | 0.39  | 4.65E-02 |
| <b>RP11-1082L8.3</b> | 0.03  | 8.88E-01 | 0.39  | 4.65E-02 |
| <b>XLOC_000839</b>   | 0.05  | 7.94E-01 | 0.39  | 4.65E-02 |
| <b>AP001412.1</b>    | 0.13  | 5.06E-01 | 0.39  | 4.67E-02 |
| <b>RAMP1</b>         | 0.28  | 1.49E-01 | 0.39  | 4.67E-02 |
| <b>SLC43A2</b>       | 0.21  | 2.76E-01 | 0.39  | 4.67E-02 |
| <b>STAC2</b>         | 0.11  | 5.75E-01 | 0.39  | 4.67E-02 |
| <b>XKR9</b>          | 0.13  | 5.09E-01 | 0.39  | 4.67E-02 |
| <b>ZHX1-C8orf76</b>  | 0.36  | 6.37E-02 | 0.39  | 4.67E-02 |
| <b>CLDN17</b>        | 0.34  | 7.32E-02 | -0.39 | 4.67E-02 |
| <b>TEX12</b>         | -0.57 | 1.58E-03 | -0.39 | 4.67E-02 |
| <b>TRPV6</b>         | -0.06 | 7.43E-01 | -0.39 | 4.67E-02 |
| <b>AC005752.10</b>   | -0.18 | 3.50E-01 | -0.39 | 4.69E-02 |
| <b>G12854</b>        | 0.12  | 5.48E-01 | 0.39  | 4.69E-02 |
| <b>MAT1A</b>         | -0.24 | 2.22E-01 | -0.39 | 4.69E-02 |
| <b>RP11-867G2.6</b>  | 0.04  | 8.52E-01 | -0.39 | 4.69E-02 |
| <b>BMP8B</b>         | -0.25 | 1.95E-01 | -0.39 | 4.71E-02 |
| <b>FBXO46</b>        | 0.44  | 2.06E-02 | 0.39  | 4.71E-02 |
| <b>HOXC9</b>         | 0.12  | 5.34E-01 | 0.39  | 4.71E-02 |
| <b>MTND4P19</b>      | 0.00  | 9.93E-01 | -0.39 | 4.71E-02 |
| <b>RP11-339B21.8</b> | -0.33 | 8.37E-02 | 0.39  | 4.71E-02 |
| <b>ZCCHC6</b>        | 0.16  | 4.04E-01 | 0.39  | 4.71E-02 |
| <b>LSAMP</b>         | -0.32 | 9.33E-02 | -0.39 | 4.73E-02 |
| <b>NOD2</b>          | 0.18  | 3.57E-01 | 0.39  | 4.73E-02 |
| <b>PCDHB19P</b>      | 0.06  | 7.81E-01 | -0.39 | 4.73E-02 |
| <b>PIGCP1</b>        | -0.12 | 5.50E-01 | 0.39  | 4.73E-02 |
| <b>RP11-1072A3.4</b> | 0.11  | 5.77E-01 | 0.39  | 4.73E-02 |
| <b>TLR10</b>         | 0.24  | 2.18E-01 | -0.39 | 4.73E-02 |
| <b>VIPR1</b>         | 0.28  | 1.47E-01 | 0.39  | 4.73E-02 |
| <b>ZFP30</b>         | -0.05 | 7.87E-01 | -0.39 | 4.73E-02 |
| <b>TP53TG1</b>       | 0.07  | 7.07E-01 | 0.38  | 4.75E-02 |
| <b>VIPAS39</b>       | 0.15  | 4.34E-01 | 0.38  | 4.75E-02 |
| <b>WDR81</b>         | 0.11  | 5.66E-01 | 0.38  | 4.75E-02 |
| <b>COBL</b>          | -0.40 | 3.41E-02 | -0.38 | 4.75E-02 |
| <b>PHYHIP</b>        | 0.03  | 8.88E-01 | -0.38 | 4.75E-02 |
| <b>RP11-255C15.3</b> | 0.11  | 5.73E-01 | -0.38 | 4.75E-02 |
| <b>RP3-467L1.4</b>   | -0.08 | 6.72E-01 | -0.38 | 4.75E-02 |
| <b>ADNP</b>          | -0.09 | 6.66E-01 | -0.38 | 4.76E-02 |
| <b>CTD-2366F13.2</b> | 0.11  | 5.92E-01 | -0.38 | 4.76E-02 |
| <b>IRAK1BP1</b>      | 0.28  | 1.56E-01 | -0.38 | 4.76E-02 |
| <b>RP11-443O13.3</b> | 0.05  | 7.86E-01 | -0.38 | 4.76E-02 |
| <b>SPATA13</b>       | -0.32 | 9.62E-02 | -0.38 | 4.76E-02 |
| <b>TNNT2</b>         | -0.26 | 1.84E-01 | -0.38 | 4.76E-02 |
| <b>G34667</b>        | 0.04  | 8.21E-01 | 0.38  | 4.76E-02 |
| <b>NIN</b>           | -0.23 | 2.43E-01 | -0.38 | 4.78E-02 |



|               |       |          |       |          |
|---------------|-------|----------|-------|----------|
| PARD6G        | 0.08  | 6.73E-01 | -0.38 | 4.78E-02 |
| TEDDM1        | 0.32  | 9.81E-02 | -0.38 | 4.78E-02 |
| CBS           | -0.21 | 2.87E-01 | -0.38 | 4.80E-02 |
| CDO1          | -0.31 | 1.13E-01 | -0.38 | 4.80E-02 |
| EXOC8         | -0.13 | 5.26E-01 | -0.38 | 4.80E-02 |
| SLC2A14       | -0.50 | 6.14E-03 | -0.38 | 4.80E-02 |
| JAG1          | 0.12  | 5.52E-01 | 0.38  | 4.80E-02 |
| REPIN1        | 0.35  | 6.84E-02 | 0.38  | 4.80E-02 |
| RP11-166B2.1  | -0.15 | 4.40E-01 | 0.38  | 4.80E-02 |
| SCARNA18      | 0.03  | 8.77E-01 | 0.38  | 4.80E-02 |
| SNORA50       | 0.14  | 4.84E-01 | 0.38  | 4.80E-02 |
| C9orf9        | -0.18 | 3.58E-01 | 0.38  | 4.82E-02 |
| CLSTN1        | -0.06 | 7.72E-01 | 0.38  | 4.82E-02 |
| G43233        | -0.14 | 4.82E-01 | -0.38 | 4.82E-02 |
| LTBP2         | 0.09  | 6.46E-01 | 0.38  | 4.82E-02 |
| C1QB          | 0.17  | 3.85E-01 | 0.38  | 4.84E-02 |
| CSGALNACT1    | 0.30  | 1.27E-01 | 0.38  | 4.84E-02 |
| HNRNPA1P22    | 0.04  | 8.53E-01 | -0.38 | 4.84E-02 |
| INSR          | -0.44 | 1.90E-02 | -0.38 | 4.84E-02 |
| RNASE6        | 0.34  | 7.24E-02 | 0.38  | 4.84E-02 |
| RP11-278A23.1 | 0.04  | 8.31E-01 | -0.38 | 4.84E-02 |
| CANT1         | 0.26  | 1.87E-01 | 0.38  | 4.86E-02 |
| EIF1AY        | 0.34  | 7.44E-02 | 0.38  | 4.86E-02 |
| 9-Mar         | -0.05 | 7.83E-01 | 0.38  | 4.86E-02 |
| NCOA7         | 0.33  | 8.42E-02 | 0.38  | 4.86E-02 |
| TICAM1        | 0.24  | 2.14E-01 | 0.38  | 4.86E-02 |
| GTF3C4        | -0.17 | 3.83E-01 | -0.38 | 4.86E-02 |
| SLC25A14      | 0.01  | 9.78E-01 | -0.38 | 4.86E-02 |
| SLITRK6       | -0.18 | 3.69E-01 | -0.38 | 4.86E-02 |
| ZNF138        | -0.26 | 1.83E-01 | -0.38 | 4.86E-02 |
| C19orf68      | -0.22 | 2.57E-01 | 0.38  | 4.88E-02 |
| CTD-3094K11.1 | 0.33  | 8.18E-02 | 0.38  | 4.88E-02 |
| FMO5          | -0.08 | 6.84E-01 | -0.38 | 4.88E-02 |
| GOLM1         | -0.09 | 6.62E-01 | -0.38 | 4.88E-02 |
| PRRC1         | -0.31 | 1.12E-01 | -0.38 | 4.88E-02 |
| ROR2          | -0.43 | 2.36E-02 | 0.38  | 4.88E-02 |
| RP11-438B23.2 | -0.03 | 8.64E-01 | -0.38 | 4.88E-02 |
| RP3-428L16.2  | 0.36  | 5.92E-02 | -0.38 | 4.88E-02 |
| TTC26         | -0.18 | 3.51E-01 | -0.38 | 4.88E-02 |
| MGME1         | 0.30  | 1.17E-01 | 0.38  | 4.90E-02 |
| RAB15         | 0.20  | 2.97E-01 | 0.38  | 4.90E-02 |
| RNF39         | -0.11 | 5.77E-01 | 0.38  | 4.90E-02 |
| LINC01589     | 0.07  | 7.05E-01 | -0.38 | 4.92E-02 |
| AC096574.5    | -0.35 | 6.75E-02 | 0.38  | 4.92E-02 |
| ARL14         | -0.03 | 8.81E-01 | 0.38  | 4.92E-02 |
| CTD-2031P19.4 | -0.03 | 8.67E-01 | 0.38  | 4.92E-02 |
| THY1          | -0.22 | 2.70E-01 | 0.38  | 4.92E-02 |

|               |       |          |       |          |
|---------------|-------|----------|-------|----------|
| TK2           | 0.02  | 9.26E-01 | 0.38  | 4.92E-02 |
| RP11-326L17.1 | -0.06 | 7.63E-01 | -0.38 | 4.94E-02 |
| EFR3B         | 0.23  | 2.42E-01 | 0.38  | 4.94E-02 |
| RXRB          | 0.11  | 5.80E-01 | 0.38  | 4.94E-02 |
| ANKRD2        | 0.06  | 7.61E-01 | -0.38 | 4.96E-02 |
| RP1-45I4.2    | 0.00  | 1.00E+00 | -0.38 | 4.96E-02 |
| SLC8A2        | 0.31  | 1.06E-01 | 0.38  | 4.96E-02 |
| AP000432.1    | 0.10  | 6.27E-01 | 0.38  | 4.98E-02 |
| TMEM154       | 0.38  | 4.56E-02 | 0.38  | 4.98E-02 |
| OSGIN2        | 0.29  | 1.31E-01 | -0.38 | 4.98E-02 |
| SLC25A21      | 0.15  | 4.59E-01 | -0.38 | 4.98E-02 |
| TUBAL3        | 0.23  | 2.33E-01 | -0.38 | 4.98E-02 |
| AKIP1         | 0.00  | 9.93E-01 | 0.38  | 5.00E-02 |
| GNGT2         | 0.35  | 6.98E-02 | 0.38  | 5.00E-02 |
| ZFAND3        | 0.04  | 8.53E-01 | 0.38  | 5.00E-02 |
| AC006262.4    | -0.31 | 1.09E-01 | -0.38 | 5.00E-02 |
| G38146        | -0.04 | 8.57E-01 | -0.38 | 5.00E-02 |
| CTD-2013N24.2 | 0.03  | 8.76E-01 | -0.38 | 5.02E-02 |
| GJB6          | 0.33  | 8.90E-02 | 0.38  | 5.02E-02 |
| LINC00152     | -0.05 | 7.98E-01 | 0.38  | 5.02E-02 |
| MMP24-AS1     | 0.11  | 5.71E-01 | 0.38  | 5.02E-02 |
| POMC          | 0.12  | 5.56E-01 | -0.38 | 5.02E-02 |
| RNF19B        | 0.33  | 8.64E-02 | 0.38  | 5.02E-02 |
| STX4          | 0.10  | 6.13E-01 | 0.38  | 5.02E-02 |
| ZNF503        | 0.24  | 2.21E-01 | 0.38  | 5.02E-02 |
| KLC4          | 0.18  | 3.61E-01 | 0.38  | 5.04E-02 |
| RP11-225H22.4 | -0.11 | 5.68E-01 | 0.38  | 5.04E-02 |
| TCTA          | 0.19  | 3.30E-01 | 0.38  | 5.04E-02 |
| TRAF2         | 0.20  | 2.98E-01 | 0.38  | 5.04E-02 |
| ARMC9         | -0.34 | 7.39E-02 | -0.38 | 5.04E-02 |
| C3orf70       | 0.06  | 7.43E-01 | -0.38 | 5.04E-02 |
| G22259        | 0.09  | 6.48E-01 | -0.38 | 5.04E-02 |
| KCNJ13        | -0.31 | 1.06E-01 | -0.38 | 5.04E-02 |
| SLC22A15      | -0.31 | 1.05E-01 | -0.38 | 5.04E-02 |
| ZNF274        | -0.03 | 8.67E-01 | -0.38 | 5.04E-02 |
| AP1G2         | 0.12  | 5.54E-01 | 0.38  | 5.06E-02 |
| G36295        | 0.24  | 2.15E-01 | -0.38 | 5.06E-02 |
| MT1P1         | 0.12  | 5.29E-01 | -0.38 | 5.06E-02 |
| RAB17         | 0.49  | 8.40E-03 | 0.38  | 5.06E-02 |
| RARRES1       | -0.01 | 9.48E-01 | -0.38 | 5.06E-02 |
| RP11-749I16.3 | 0.36  | 5.80E-02 | -0.38 | 5.06E-02 |
| RP11-95O2.1   | -0.30 | 1.23E-01 | -0.38 | 5.06E-02 |
| RP3-525N10.2  | -0.30 | 1.19E-01 | -0.38 | 5.06E-02 |
| SENP2         | -0.01 | 9.69E-01 | -0.38 | 5.06E-02 |
| ECEL1P3       | 0.23  | 2.37E-01 | -0.38 | 5.08E-02 |
| G31356        | -0.17 | 3.89E-01 | -0.38 | 5.08E-02 |
| G909          | -0.06 | 7.77E-01 | -0.38 | 5.08E-02 |

|                |       |          |       |          |
|----------------|-------|----------|-------|----------|
| ATG9A          | 0.04  | 8.42E-01 | 0.38  | 5.08E-02 |
| PGLYRP4        | 0.41  | 3.07E-02 | 0.38  | 5.08E-02 |
| CCSAP          | -0.21 | 2.91E-01 | -0.38 | 5.10E-02 |
| LINC00322      | 0.09  | 6.44E-01 | -0.38 | 5.10E-02 |
| MT-TF          | 0.00  | 9.83E-01 | -0.38 | 5.10E-02 |
| PBX4           | -0.39 | 4.09E-02 | -0.38 | 5.10E-02 |
| RN7SKP92       | -0.03 | 8.69E-01 | -0.38 | 5.10E-02 |
| TMEM68         | -0.05 | 8.07E-01 | -0.38 | 5.10E-02 |
| CTD-2650P22.1  | 0.23  | 2.44E-01 | 0.38  | 5.12E-02 |
| DDX11-AS1      | -0.30 | 1.20E-01 | -0.38 | 5.12E-02 |
| EHF            | 0.25  | 1.99E-01 | 0.38  | 5.12E-02 |
| EHMT1          | 0.21  | 2.78E-01 | 0.38  | 5.12E-02 |
| G35839         | 0.06  | 7.73E-01 | -0.38 | 5.12E-02 |
| LCK            | 0.38  | 4.76E-02 | 0.38  | 5.12E-02 |
| MACC1-AS1      | -0.05 | 8.11E-01 | -0.38 | 5.12E-02 |
| RN7SL521P      | 0.09  | 6.59E-01 | -0.38 | 5.12E-02 |
| RP11-231D20.2  | 0.11  | 5.75E-01 | 0.38  | 5.12E-02 |
| RP11-773H22.4  | -0.09 | 6.44E-01 | -0.38 | 5.12E-02 |
| RP4-529N6.1    | -0.04 | 8.36E-01 | 0.38  | 5.12E-02 |
| 11-Sep         | -0.13 | 5.03E-01 | -0.38 | 5.12E-02 |
| XLOC_005410    | -0.03 | 8.83E-01 | 0.38  | 5.12E-02 |
| ZC3H4          | 0.31  | 1.08E-01 | 0.38  | 5.12E-02 |
| B3GNT9         | -0.09 | 6.43E-01 | 0.38  | 5.14E-02 |
| IKZF5          | -0.28 | 1.48E-01 | -0.38 | 5.14E-02 |
| KIF27          | -0.13 | 5.11E-01 | -0.38 | 5.14E-02 |
| SLC25A29       | -0.23 | 2.36E-01 | -0.38 | 5.14E-02 |
| CHMP1B2P       | -0.10 | 5.95E-01 | -0.38 | 5.16E-02 |
| CTC-436P18.4   | 0.25  | 2.06E-01 | -0.38 | 5.16E-02 |
| FGF17          | -0.10 | 6.19E-01 | -0.38 | 5.16E-02 |
| GLP1R          | 0.20  | 3.08E-01 | 0.38  | 5.16E-02 |
| RP11-180M15.4  | 0.23  | 2.37E-01 | 0.38  | 5.16E-02 |
| SEC14L4        | -0.19 | 3.39E-01 | -0.38 | 5.16E-02 |
| RP11-1415C14.4 | -0.04 | 8.22E-01 | 0.38  | 5.18E-02 |
| RP11-95G6.1    | -0.34 | 7.39E-02 | 0.38  | 5.18E-02 |
| TMEM42         | 0.02  | 9.36E-01 | 0.38  | 5.18E-02 |
| DUS4L          | 0.14  | 4.93E-01 | -0.38 | 5.18E-02 |
| PER2           | -0.27 | 1.70E-01 | -0.38 | 5.18E-02 |
| AC006994.2     | 0.04  | 8.21E-01 | -0.38 | 5.20E-02 |
| CTD-2201E18.3  | 0.02  | 9.39E-01 | 0.38  | 5.20E-02 |
| DLEU1          | 0.23  | 2.47E-01 | -0.38 | 5.20E-02 |
| G41823         | 0.08  | 6.68E-01 | -0.38 | 5.20E-02 |
| MFSD6L         | 0.04  | 8.50E-01 | -0.38 | 5.20E-02 |
| OR9I3P         | -0.34 | 7.32E-02 | -0.38 | 5.20E-02 |
| RP11-454P21.1  | 0.23  | 2.47E-01 | 0.38  | 5.20E-02 |
| GPATCH2        | 0.00  | 9.82E-01 | -0.38 | 5.22E-02 |
| KCNJ9          | 0.01  | 9.45E-01 | -0.38 | 5.22E-02 |
| RP11-20G13.5   | 0.10  | 6.28E-01 | -0.38 | 5.22E-02 |

|                      |       |          |       |          |
|----------------------|-------|----------|-------|----------|
| <b>RP11-277I20.2</b> | -0.16 | 4.15E-01 | -0.38 | 5.22E-02 |
| <b>RPL35P2</b>       | -0.13 | 5.01E-01 | 0.38  | 5.22E-02 |
| <b>STYK1</b>         | 0.11  | 5.69E-01 | 0.38  | 5.22E-02 |
| <b>TTC7B</b>         | 0.31  | 1.08E-01 | 0.38  | 5.22E-02 |
| <b>UNC93B1</b>       | 0.06  | 7.72E-01 | 0.38  | 5.22E-02 |
| <b>ZBED6CL</b>       | 0.29  | 1.33E-01 | 0.38  | 5.22E-02 |
| <b>ZSCAN18</b>       | -0.28 | 1.44E-01 | -0.38 | 5.22E-02 |
| <b>AC007228.11</b>   | 0.15  | 4.60E-01 | -0.38 | 5.24E-02 |
| <b>C1QC</b>          | 0.13  | 5.00E-01 | 0.38  | 5.24E-02 |
| <b>IKBKG</b>         | 0.03  | 8.86E-01 | 0.38  | 5.24E-02 |
| <b>LPAR6</b>         | 0.29  | 1.33E-01 | 0.38  | 5.24E-02 |
| <b>RP11-446N19.1</b> | 0.05  | 8.09E-01 | -0.38 | 5.24E-02 |
| <b>FAM205A</b>       | 0.06  | 7.48E-01 | 0.38  | 5.26E-02 |
| <b>PRPF4B</b>        | 0.02  | 9.24E-01 | -0.38 | 5.26E-02 |
| <b>RP11-536C5.2</b>  | -0.30 | 1.17E-01 | -0.38 | 5.26E-02 |
| <b>RP11-576N17.5</b> | -0.31 | 1.12E-01 | -0.38 | 5.26E-02 |
| <b>RP11-80H5.7</b>   | -0.11 | 5.69E-01 | -0.38 | 5.26E-02 |
| <b>STXBP2</b>        | 0.19  | 3.39E-01 | 0.38  | 5.26E-02 |
| <b>TNFRSF4</b>       | 0.23  | 2.41E-01 | 0.38  | 5.26E-02 |
| <b>GALNT11</b>       | -0.24 | 2.15E-01 | -0.38 | 5.28E-02 |
| <b>RP11-230B22.1</b> | 0.15  | 4.45E-01 | 0.38  | 5.28E-02 |
| <b>AC008985.1</b>    | -0.05 | 7.99E-01 | 0.38  | 5.30E-02 |
| <b>MED20</b>         | 0.03  | 8.75E-01 | 0.38  | 5.30E-02 |
| <b>RP11-506N2.1</b>  | -0.20 | 3.17E-01 | -0.38 | 5.30E-02 |
| <b>RP11-73G16.2</b>  | -0.22 | 2.69E-01 | 0.38  | 5.30E-02 |
| <b>RP4-781B1.5</b>   | -0.26 | 1.84E-01 | -0.38 | 5.30E-02 |
| <b>SREBF2</b>        | 0.09  | 6.54E-01 | 0.38  | 5.30E-02 |
| <b>ZNF726</b>        | -0.09 | 6.60E-01 | -0.38 | 5.30E-02 |
| <b>PPP1R18</b>       | 0.01  | 9.51E-01 | 0.38  | 5.33E-02 |
| <b>SLC26A11</b>      | -0.11 | 5.76E-01 | 0.38  | 5.33E-02 |
| <b>CTB-50L17.5</b>   | 0.03  | 8.75E-01 | -0.38 | 5.33E-02 |
| <b>SLAIN1</b>        | -0.30 | 1.17E-01 | -0.38 | 5.33E-02 |
| <b>ITGB1P1</b>       | 0.05  | 8.13E-01 | -0.38 | 5.35E-02 |
| <b>SYCP2L</b>        | -0.10 | 6.00E-01 | -0.38 | 5.35E-02 |
| <b>ZBP1</b>          | 0.24  | 2.27E-01 | 0.38  | 5.35E-02 |
| <b>ASAP2</b>         | -0.18 | 3.59E-01 | -0.38 | 5.37E-02 |
| <b>TAMM41</b>        | -0.17 | 3.83E-01 | -0.38 | 5.37E-02 |
| <b>EIF4BP3</b>       | -0.07 | 7.26E-01 | 0.38  | 5.37E-02 |
| <b>GJA1</b>          | 0.23  | 2.43E-01 | 0.38  | 5.37E-02 |
| <b>SLC4A3</b>        | 0.30  | 1.25E-01 | 0.38  | 5.37E-02 |
| <b>ADAMTS17</b>      | -0.19 | 3.29E-01 | -0.38 | 5.39E-02 |
| <b>FAHD2B</b>        | -0.18 | 3.66E-01 | -0.38 | 5.39E-02 |
| <b>GRM7-AS1</b>      | -0.20 | 3.15E-01 | -0.38 | 5.39E-02 |
| <b>IL20RB</b>        | -0.15 | 4.37E-01 | 0.38  | 5.39E-02 |
| <b>LINC00937</b>     | -0.21 | 2.73E-01 | -0.38 | 5.39E-02 |
| <b>MFSD2A</b>        | -0.09 | 6.43E-01 | -0.38 | 5.39E-02 |
| <b>NIPSNAP3B</b>     | -0.20 | 2.96E-01 | -0.38 | 5.39E-02 |

|                      |       |          |       |          |
|----------------------|-------|----------|-------|----------|
| <b>RP11-145E17.3</b> | 0.12  | 5.43E-01 | -0.38 | 5.39E-02 |
| <b>TAPBPL</b>        | 0.09  | 6.63E-01 | 0.38  | 5.39E-02 |
| <b>DEFB109P1</b>     | -0.18 | 3.65E-01 | -0.37 | 5.41E-02 |
| <b>XLOC_002675</b>   | 0.14  | 4.86E-01 | -0.37 | 5.41E-02 |
| <b>EYA2</b>          | 0.37  | 5.56E-02 | 0.37  | 5.41E-02 |
| <b>G31837</b>        | -0.24 | 2.26E-01 | 0.37  | 5.41E-02 |
| <b>GPR137</b>        | -0.05 | 8.15E-01 | 0.37  | 5.41E-02 |
| <b>PRKAR2A-AS1</b>   | 0.12  | 5.56E-01 | 0.37  | 5.41E-02 |
| <b>USF1</b>          | 0.25  | 2.05E-01 | 0.37  | 5.41E-02 |
| <b>DMXL1</b>         | -0.08 | 6.77E-01 | -0.37 | 5.45E-02 |
| <b>FAM122A</b>       | 0.04  | 8.55E-01 | -0.37 | 5.45E-02 |
| <b>G36656</b>        | 0.11  | 5.62E-01 | 0.37  | 5.45E-02 |
| <b>MFSD3</b>         | -0.01 | 9.54E-01 | 0.37  | 5.45E-02 |
| <b>NFATC3</b>        | 0.02  | 9.20E-01 | 0.37  | 5.45E-02 |
| <b>PABPC5-AS1</b>    | -0.04 | 8.27E-01 | -0.37 | 5.45E-02 |
| <b>PFKFB4</b>        | 0.31  | 1.07E-01 | 0.37  | 5.45E-02 |
| <b>RNASEL</b>        | 0.11  | 5.92E-01 | 0.37  | 5.45E-02 |
| <b>ZNF418</b>        | 0.10  | 6.19E-01 | -0.37 | 5.45E-02 |
| <b>CD300C</b>        | -0.02 | 9.17E-01 | 0.37  | 5.47E-02 |
| <b>LINC00866</b>     | -0.03 | 8.71E-01 | 0.37  | 5.47E-02 |
| <b>OR5K2</b>         | 0.00  | 9.97E-01 | 0.37  | 5.47E-02 |
| <b>ALG13</b>         | -0.32 | 9.45E-02 | -0.37 | 5.47E-02 |
| <b>BACH1-AS1</b>     | -0.19 | 3.20E-01 | -0.37 | 5.47E-02 |
| <b>IGFL2</b>         | -0.19 | 3.33E-01 | -0.37 | 5.47E-02 |
| <b>LRRC7</b>         | -0.27 | 1.70E-01 | -0.37 | 5.47E-02 |
| <b>WRN</b>           | -0.02 | 9.32E-01 | -0.37 | 5.47E-02 |
| <b>C1S</b>           | 0.03  | 8.90E-01 | 0.37  | 5.49E-02 |
| <b>GCNT3</b>         | 0.18  | 3.65E-01 | 0.37  | 5.49E-02 |
| <b>GJB2</b>          | 0.33  | 8.84E-02 | 0.37  | 5.49E-02 |
| <b>RP11-686O6.2</b>  | -0.20 | 3.14E-01 | 0.37  | 5.49E-02 |
| <b>SEMA4A</b>        | 0.07  | 7.24E-01 | 0.37  | 5.49E-02 |
| <b>TRBV19</b>        | -0.04 | 8.26E-01 | 0.37  | 5.49E-02 |
| <b>FGFR1OP</b>       | -0.03 | 8.68E-01 | -0.37 | 5.49E-02 |
| <b>GUCA1B</b>        | -0.07 | 7.16E-01 | -0.37 | 5.49E-02 |
| <b>RP11-508M8.1</b>  | 0.14  | 4.83E-01 | -0.37 | 5.49E-02 |
| <b>RP11-517M22.1</b> | -0.08 | 6.77E-01 | -0.37 | 5.49E-02 |
| <b>RPS17P1</b>       | -0.05 | 8.13E-01 | -0.37 | 5.49E-02 |
| <b>SH3BGRL2</b>      | 0.00  | 9.82E-01 | -0.37 | 5.49E-02 |
| <b>BTBD2</b>         | 0.22  | 2.63E-01 | 0.37  | 5.52E-02 |
| <b>HR</b>            | 0.43  | 2.11E-02 | 0.37  | 5.52E-02 |
| <b>ABRA</b>          | -0.01 | 9.67E-01 | -0.37 | 5.52E-02 |
| <b>NUMBL</b>         | -0.04 | 8.58E-01 | -0.37 | 5.52E-02 |
| <b>OR7E47P</b>       | -0.13 | 5.15E-01 | -0.37 | 5.52E-02 |
| <b>PLEKHA6</b>       | -0.35 | 6.98E-02 | -0.37 | 5.52E-02 |
| <b>FAM83A</b>        | 0.48  | 9.23E-03 | 0.37  | 5.54E-02 |
| <b>KIAA1024</b>      | 0.12  | 5.54E-01 | -0.37 | 5.54E-02 |
| <b>MBNL1</b>         | 0.04  | 8.24E-01 | -0.37 | 5.54E-02 |

|                      |       |          |       |          |
|----------------------|-------|----------|-------|----------|
| <b>MED23</b>         | 0.16  | 4.02E-01 | -0.37 | 5.54E-02 |
| <b>MTBP</b>          | 0.02  | 9.21E-01 | -0.37 | 5.54E-02 |
| <b>OR51E1</b>        | -0.26 | 1.84E-01 | 0.37  | 5.54E-02 |
| <b>RP11-311F12.1</b> | 0.04  | 8.52E-01 | -0.37 | 5.54E-02 |
| <b>SCNN1B</b>        | 0.06  | 7.81E-01 | -0.37 | 5.54E-02 |
| <b>ZNF570</b>        | -0.03 | 8.95E-01 | -0.37 | 5.54E-02 |
| <b>RP11-255H23.2</b> | -0.12 | 5.44E-01 | -0.37 | 5.56E-02 |
| <b>FAM13B</b>        | 0.35  | 6.94E-02 | 0.37  | 5.56E-02 |
| <b>NOX4</b>          | 0.17  | 3.94E-01 | 0.37  | 5.56E-02 |
| <b>RP11-373D23.3</b> | -0.35 | 7.10E-02 | 0.37  | 5.56E-02 |
| <b>F8A1</b>          | 0.45  | 1.53E-02 | 0.37  | 5.58E-02 |
| <b>FAM171B</b>       | -0.14 | 4.90E-01 | -0.37 | 5.58E-02 |
| <b>KB-1639H6.2</b>   | -0.14 | 4.86E-01 | -0.37 | 5.58E-02 |
| <b>PANK4</b>         | -0.01 | 9.71E-01 | 0.37  | 5.58E-02 |
| <b>RP11-320P7.2</b>  | -0.33 | 8.67E-02 | -0.37 | 5.58E-02 |
| <b>RP11-429E11.2</b> | -0.27 | 1.58E-01 | 0.37  | 5.58E-02 |
| <b>AC079781.7</b>    | -0.40 | 3.31E-02 | -0.37 | 5.60E-02 |
| <b>G5758</b>         | -0.40 | 3.37E-02 | -0.37 | 5.60E-02 |
| <b>G6426</b>         | 0.04  | 8.59E-01 | -0.37 | 5.60E-02 |
| <b>MPRIP</b>         | 0.03  | 8.88E-01 | -0.37 | 5.60E-02 |
| <b>TMEM170A</b>      | -0.05 | 7.92E-01 | -0.37 | 5.60E-02 |
| <b>AC064850.4</b>    | -0.08 | 6.95E-01 | 0.37  | 5.62E-02 |
| <b>ANK1</b>          | 0.04  | 8.36E-01 | 0.37  | 5.62E-02 |
| <b>LOXL2</b>         | -0.18 | 3.55E-01 | 0.37  | 5.62E-02 |
| <b>ODF3B</b>         | 0.11  | 5.65E-01 | 0.37  | 5.62E-02 |
| <b>AC016894.1</b>    | 0.20  | 3.05E-01 | -0.37 | 5.62E-02 |
| <b>ANKRD26P3</b>     | -0.26 | 1.77E-01 | -0.37 | 5.65E-02 |
| <b>G18962</b>        | -0.01 | 9.79E-01 | 0.37  | 5.65E-02 |
| <b>G5109</b>         | -0.22 | 2.61E-01 | -0.37 | 5.65E-02 |
| <b>NFKBID</b>        | 0.35  | 7.01E-02 | 0.37  | 5.65E-02 |
| <b>STK35</b>         | 0.25  | 2.04E-01 | -0.37 | 5.65E-02 |
| <b>TCEANC2</b>       | 0.02  | 9.00E-01 | 0.37  | 5.65E-02 |
| <b>ABI3</b>          | 0.31  | 1.05E-01 | 0.37  | 5.67E-02 |
| <b>RP11-148B3.1</b>  | -0.06 | 7.58E-01 | 0.37  | 5.67E-02 |
| <b>AMY2B</b>         | 0.01  | 9.61E-01 | -0.37 | 5.67E-02 |
| <b>G30143</b>        | -0.07 | 7.14E-01 | -0.37 | 5.67E-02 |
| <b>GPR19</b>         | 0.02  | 9.21E-01 | -0.37 | 5.67E-02 |
| <b>PPIL6</b>         | -0.33 | 8.67E-02 | -0.37 | 5.67E-02 |
| <b>CTB-179K24.3</b>  | -0.36 | 5.99E-02 | -0.37 | 5.69E-02 |
| <b>G28648</b>        | 0.30  | 1.16E-01 | -0.37 | 5.69E-02 |
| <b>MTURN</b>         | -0.34 | 7.56E-02 | -0.37 | 5.69E-02 |
| <b>RP11-404P21.1</b> | 0.19  | 3.39E-01 | -0.37 | 5.69E-02 |
| <b>SYTL2</b>         | -0.12 | 5.34E-01 | -0.37 | 5.69E-02 |
| <b>DSC2</b>          | 0.21  | 2.76E-01 | 0.37  | 5.69E-02 |
| <b>RP11-752L20.3</b> | -0.15 | 4.53E-01 | 0.37  | 5.69E-02 |
| <b>RPL37P2</b>       | 0.15  | 4.50E-01 | 0.37  | 5.69E-02 |
| <b>SNORA23</b>       | 0.10  | 6.12E-01 | 0.37  | 5.69E-02 |

|                |       |          |       |          |
|----------------|-------|----------|-------|----------|
| SUPT6H         | -0.01 | 9.76E-01 | 0.37  | 5.69E-02 |
| ZNF687         | -0.13 | 5.01E-01 | 0.37  | 5.69E-02 |
| CDH20          | -0.37 | 5.42E-02 | -0.37 | 5.71E-02 |
| CDYL2          | 0.13  | 5.04E-01 | 0.37  | 5.71E-02 |
| NAP1L3         | -0.28 | 1.53E-01 | -0.37 | 5.71E-02 |
| C1orf194       | 0.03  | 8.80E-01 | -0.37 | 5.73E-02 |
| EDN1           | -0.11 | 5.80E-01 | -0.37 | 5.73E-02 |
| PARD3          | -0.24 | 2.18E-01 | -0.37 | 5.73E-02 |
| RELL2          | 0.14  | 4.92E-01 | 0.37  | 5.73E-02 |
| RP11-298J20.3  | 0.19  | 3.25E-01 | 0.37  | 5.73E-02 |
| RPL12P42       | 0.18  | 3.60E-01 | 0.37  | 5.73E-02 |
| CA1            | -0.03 | 8.74E-01 | -0.37 | 5.76E-02 |
| CCDC125        | 0.23  | 2.37E-01 | 0.37  | 5.76E-02 |
| ENKUR          | 0.27  | 1.64E-01 | 0.37  | 5.76E-02 |
| FADS1          | -0.22 | 2.66E-01 | -0.37 | 5.76E-02 |
| MFGE8          | 0.19  | 3.24E-01 | 0.37  | 5.76E-02 |
| RP11-110H1.9   | -0.11 | 5.89E-01 | -0.37 | 5.76E-02 |
| RP11-261C10.5  | -0.22 | 2.70E-01 | -0.37 | 5.76E-02 |
| TLCD1          | -0.02 | 9.27E-01 | -0.37 | 5.76E-02 |
| TNRC6C         | -0.16 | 4.04E-01 | 0.37  | 5.76E-02 |
| XLOC_012011    | 0.20  | 2.98E-01 | -0.37 | 5.76E-02 |
| ARHGEF26-AS1   | -0.21 | 2.88E-01 | -0.37 | 5.78E-02 |
| FZD8           | -0.33 | 8.62E-02 | -0.37 | 5.78E-02 |
| RNU4-2         | 0.07  | 7.23E-01 | 0.37  | 5.78E-02 |
| RP1-40E16.9    | -0.32 | 9.27E-02 | 0.37  | 5.78E-02 |
| RP11-710F7.3   | -0.23 | 2.40E-01 | -0.37 | 5.78E-02 |
| RP11-792A8.1   | 0.03  | 8.86E-01 | 0.37  | 5.78E-02 |
| CADM1          | 0.18  | 3.56E-01 | 0.37  | 5.80E-02 |
| CLEC4F         | 0.04  | 8.37E-01 | 0.37  | 5.80E-02 |
| EGFLAM         | 0.01  | 9.45E-01 | 0.37  | 5.80E-02 |
| HSD3BP3        | 0.09  | 6.36E-01 | 0.37  | 5.80E-02 |
| PSIP1          | -0.21 | 2.80E-01 | -0.37 | 5.80E-02 |
| REPS1          | 0.10  | 6.03E-01 | -0.37 | 5.80E-02 |
| RP11-251G23.5  | -0.31 | 1.09E-01 | -0.37 | 5.80E-02 |
| RP11-651L5.3   | 0.24  | 2.27E-01 | 0.37  | 5.80E-02 |
| SPTBN1         | -0.34 | 7.32E-02 | -0.37 | 5.80E-02 |
| STOML3         | -0.05 | 7.82E-01 | -0.37 | 5.80E-02 |
| LINC01206      | 0.18  | 3.50E-01 | 0.37  | 5.82E-02 |
| METTL8         | 0.21  | 2.78E-01 | 0.37  | 5.82E-02 |
| NCKIPSD        | 0.36  | 5.62E-02 | 0.37  | 5.82E-02 |
| PRKCQ          | 0.38  | 4.68E-02 | 0.37  | 5.82E-02 |
| RP11-1348G14.8 | 0.05  | 7.84E-01 | 0.37  | 5.82E-02 |
| TNFAIP8        | 0.19  | 3.40E-01 | 0.37  | 5.82E-02 |
| EIF5A2         | 0.15  | 4.44E-01 | -0.37 | 5.82E-02 |
| GSTM3          | 0.38  | 4.81E-02 | -0.37 | 5.82E-02 |
| OR7E22P        | 0.02  | 9.12E-01 | -0.37 | 5.82E-02 |
| TXNP5          | -0.12 | 5.56E-01 | -0.37 | 5.82E-02 |

|                      |       |          |       |          |
|----------------------|-------|----------|-------|----------|
| <b>ADGRB3</b>        | -0.42 | 2.53E-02 | 0.37  | 5.85E-02 |
| <b>IRF2</b>          | 0.26  | 1.89E-01 | 0.37  | 5.85E-02 |
| <b>IRF7</b>          | 0.29  | 1.42E-01 | 0.37  | 5.85E-02 |
| <b>PPFIBP1</b>       | -0.23 | 2.44E-01 | -0.37 | 5.85E-02 |
| <b>RAB24</b>         | 0.39  | 4.17E-02 | 0.37  | 5.85E-02 |
| <b>SLC16A9</b>       | 0.40  | 3.60E-02 | 0.37  | 5.85E-02 |
| <b>ZNF441</b>        | -0.25 | 1.91E-01 | -0.37 | 5.85E-02 |
| <b>AC025171.1</b>    | -0.13 | 5.00E-01 | 0.37  | 5.87E-02 |
| <b>CTC-506B8.1</b>   | -0.27 | 1.58E-01 | -0.37 | 5.87E-02 |
| <b>DDIT4</b>         | 0.12  | 5.40E-01 | 0.37  | 5.87E-02 |
| <b>FABP5</b>         | 0.23  | 2.37E-01 | 0.37  | 5.87E-02 |
| <b>FAM234A</b>       | 0.18  | 3.67E-01 | 0.37  | 5.87E-02 |
| <b>LINC00842</b>     | 0.11  | 5.86E-01 | -0.37 | 5.87E-02 |
| <b>NSMAF</b>         | -0.08 | 6.79E-01 | -0.37 | 5.87E-02 |
| <b>OR7E94P</b>       | 0.02  | 9.17E-01 | -0.37 | 5.87E-02 |
| <b>RP11-552M11.4</b> | -0.08 | 6.84E-01 | -0.37 | 5.87E-02 |
| <b>ACADL</b>         | -0.27 | 1.57E-01 | -0.37 | 5.89E-02 |
| <b>AP000442.1</b>    | 0.00  | 9.92E-01 | 0.37  | 5.89E-02 |
| <b>CRYZP1</b>        | 0.19  | 3.22E-01 | -0.37 | 5.89E-02 |
| <b>FSIP2-AS1</b>     | -0.12 | 5.47E-01 | -0.37 | 5.89E-02 |
| <b>PSD4</b>          | 0.30  | 1.16E-01 | 0.37  | 5.89E-02 |
| <b>RP11-3304.2</b>   | -0.05 | 8.11E-01 | -0.37 | 5.89E-02 |
| <b>RP13-131K19.1</b> | -0.05 | 7.85E-01 | -0.37 | 5.89E-02 |
| <b>SDC4</b>          | 0.09  | 6.60E-01 | -0.37 | 5.89E-02 |
| <b>ZNF502</b>        | 0.16  | 4.11E-01 | -0.37 | 5.89E-02 |
| <b>KIAA1683</b>      | -0.19 | 3.31E-01 | -0.37 | 5.91E-02 |
| <b>MYOZ1</b>         | 0.03  | 8.66E-01 | -0.37 | 5.91E-02 |
| <b>SLC46A2</b>       | -0.35 | 6.89E-02 | -0.37 | 5.91E-02 |
| <b>ARHGEF37</b>      | 0.41  | 2.88E-02 | 0.37  | 5.91E-02 |
| <b>ADRA2C</b>        | -0.32 | 1.01E-01 | 0.37  | 5.94E-02 |
| <b>AP000662.9</b>    | -0.08 | 6.83E-01 | -0.37 | 5.94E-02 |
| <b>CLEC4C</b>        | 0.04  | 8.28E-01 | 0.37  | 5.94E-02 |
| <b>GALK1</b>         | 0.01  | 9.54E-01 | 0.37  | 5.94E-02 |
| <b>POGK</b>          | 0.16  | 4.16E-01 | -0.37 | 5.94E-02 |
| <b>RN7SL36P</b>      | -0.12 | 5.49E-01 | -0.37 | 5.94E-02 |
| <b>RP11-297A16.2</b> | 0.13  | 5.23E-01 | 0.37  | 5.94E-02 |
| <b>ZBTB10</b>        | -0.20 | 2.99E-01 | -0.37 | 5.94E-02 |
| <b>BIN2</b>          | 0.33  | 8.59E-02 | 0.37  | 5.96E-02 |
| <b>CHST3</b>         | 0.41  | 3.09E-02 | 0.37  | 5.96E-02 |
| <b>GGH</b>           | 0.21  | 2.95E-01 | 0.37  | 5.96E-02 |
| <b>HSPE1P28</b>      | 0.02  | 9.08E-01 | 0.37  | 5.96E-02 |
| <b>SNORA42</b>       | -0.08 | 6.69E-01 | 0.37  | 5.96E-02 |
| <b>TVP23A</b>        | -0.02 | 9.14E-01 | 0.37  | 5.96E-02 |
| <b>AC136289.1</b>    | 0.17  | 3.73E-01 | -0.37 | 5.96E-02 |
| <b>ACTBP13</b>       | -0.10 | 6.01E-01 | -0.37 | 5.96E-02 |
| <b>BMP2</b>          | -0.02 | 9.25E-01 | -0.37 | 5.96E-02 |
| <b>CCDC126</b>       | 0.09  | 6.60E-01 | -0.37 | 5.96E-02 |



|                      |       |          |       |          |
|----------------------|-------|----------|-------|----------|
| <b>CTD-3126B10.2</b> | -0.01 | 9.57E-01 | -0.37 | 5.96E-02 |
| <b>DGCR5</b>         | -0.37 | 5.10E-02 | -0.37 | 5.96E-02 |
| <b>PAX8</b>          | 0.17  | 3.91E-01 | -0.37 | 5.96E-02 |
| <b>ZNF680</b>        | 0.04  | 8.58E-01 | -0.37 | 5.96E-02 |
| <b>DPY19L2P3</b>     | -0.21 | 2.83E-01 | -0.37 | 5.98E-02 |
| <b>RP11-553A10.1</b> | 0.14  | 4.91E-01 | -0.37 | 5.98E-02 |
| <b>ZBTB24</b>        | 0.07  | 7.35E-01 | -0.37 | 5.98E-02 |
| <b>C5orf66</b>       | 0.34  | 7.95E-02 | 0.37  | 5.98E-02 |
| <b>RN7SL142P</b>     | 0.31  | 1.13E-01 | 0.37  | 5.98E-02 |
| <b>RP11-713P17.3</b> | 0.17  | 3.85E-01 | 0.37  | 5.98E-02 |
| <b>C3orf58</b>       | -0.03 | 8.78E-01 | -0.37 | 6.00E-02 |
| <b>CTSB</b>          | 0.16  | 4.14E-01 | 0.37  | 6.00E-02 |
| <b>GPM6B</b>         | -0.29 | 1.40E-01 | -0.37 | 6.00E-02 |
| <b>RP11-340I6.8</b>  | -0.27 | 1.71E-01 | -0.37 | 6.00E-02 |
| <b>SYT9</b>          | -0.22 | 2.52E-01 | -0.37 | 6.00E-02 |
| <b>VAC14</b>         | 0.39  | 3.94E-02 | 0.37  | 6.00E-02 |
| <b>WWOX</b>          | -0.01 | 9.64E-01 | 0.37  | 6.00E-02 |
| <b>RP1-191J18.66</b> | 0.11  | 5.90E-01 | 0.37  | 6.03E-02 |
| <b>RP11-256L6.2</b>  | 0.16  | 4.19E-01 | 0.37  | 6.03E-02 |
| <b>TFE3</b>          | 0.19  | 3.36E-01 | 0.37  | 6.03E-02 |
| <b>ITIH1</b>         | 0.12  | 5.46E-01 | -0.37 | 6.03E-02 |
| <b>RP11-83M16.5</b>  | 0.04  | 8.27E-01 | -0.37 | 6.03E-02 |
| <b>ZNF107</b>        | 0.04  | 8.58E-01 | -0.37 | 6.03E-02 |
| <b>NPFFR1</b>        | 0.06  | 7.62E-01 | -0.37 | 6.05E-02 |
| <b>ABTB1</b>         | -0.16 | 4.08E-01 | 0.37  | 6.05E-02 |
| <b>AL353662.1</b>    | -0.07 | 7.28E-01 | 0.37  | 6.05E-02 |
| <b>FBXW4</b>         | 0.00  | 9.93E-01 | 0.37  | 6.05E-02 |
| <b>G4754</b>         | -0.21 | 2.88E-01 | 0.37  | 6.05E-02 |
| <b>MARK2</b>         | 0.13  | 5.01E-01 | 0.37  | 6.05E-02 |
| <b>RAB4B</b>         | 0.28  | 1.47E-01 | 0.37  | 6.05E-02 |
| <b>TRAJ34</b>        | -0.14 | 4.72E-01 | 0.37  | 6.05E-02 |
| <b>CTC-518B2.8</b>   | 0.43  | 2.37E-02 | 0.37  | 6.07E-02 |
| <b>G5385</b>         | 0.28  | 1.42E-01 | 0.37  | 6.07E-02 |
| <b>SELPLG</b>        | 0.30  | 1.16E-01 | 0.37  | 6.07E-02 |
| <b>DUSP13</b>        | 0.27  | 1.60E-01 | -0.37 | 6.07E-02 |
| <b>GRIK1</b>         | 0.00  | 9.80E-01 | -0.37 | 6.07E-02 |
| <b>PDLIM5</b>        | -0.17 | 4.01E-01 | -0.37 | 6.07E-02 |
| <b>POLR2J4</b>       | -0.42 | 2.73E-02 | -0.37 | 6.07E-02 |
| <b>RN7SKP227</b>     | 0.22  | 2.50E-01 | -0.37 | 6.07E-02 |
| <b>RNU6-242P</b>     | -0.08 | 6.79E-01 | -0.37 | 6.07E-02 |
| <b>RP1-12G14.7</b>   | -0.22 | 2.54E-01 | -0.37 | 6.07E-02 |
| <b>RP1-67A8.3</b>    | -0.25 | 2.03E-01 | -0.37 | 6.07E-02 |
| <b>RP11-66B24.7</b>  | -0.18 | 3.64E-01 | -0.37 | 6.07E-02 |
| <b>RP3-509I19.6</b>  | 0.00  | 9.97E-01 | -0.37 | 6.07E-02 |
| <b>ZNF675</b>        | -0.17 | 3.96E-01 | -0.37 | 6.07E-02 |
| <b>DOPEY1</b>        | 0.01  | 9.70E-01 | -0.37 | 6.10E-02 |
| <b>GNB3</b>          | 0.11  | 5.74E-01 | -0.37 | 6.10E-02 |

|               |       |          |       |          |
|---------------|-------|----------|-------|----------|
| LPO           | -0.16 | 4.29E-01 | -0.37 | 6.10E-02 |
| RP11-61K12.2  | -0.29 | 1.35E-01 | -0.37 | 6.10E-02 |
| TRIM35        | 0.08  | 6.82E-01 | -0.37 | 6.10E-02 |
| ZNF66         | -0.25 | 2.06E-01 | -0.37 | 6.10E-02 |
| RN7SKP134     | -0.06 | 7.79E-01 | 0.37  | 6.10E-02 |
| G39251        | -0.26 | 1.82E-01 | -0.36 | 6.12E-02 |
| LRRC36        | -0.07 | 7.32E-01 | -0.36 | 6.12E-02 |
| NAP1L1P1      | 0.32  | 9.93E-02 | -0.36 | 6.12E-02 |
| RP11-396B14.2 | -0.11 | 5.75E-01 | 0.36  | 6.12E-02 |
| WDR24         | 0.21  | 2.87E-01 | 0.36  | 6.12E-02 |
| ZNF812        | 0.44  | 1.81E-02 | 0.36  | 6.12E-02 |
| FAM153B       | -0.12 | 5.35E-01 | -0.36 | 6.14E-02 |
| MTMR10        | -0.11 | 5.89E-01 | -0.36 | 6.14E-02 |
| NEMP2         | -0.30 | 1.18E-01 | -0.36 | 6.14E-02 |
| NGEF          | -0.24 | 2.23E-01 | -0.36 | 6.14E-02 |
| SLC19A2       | -0.08 | 6.78E-01 | -0.36 | 6.14E-02 |
| CARHSP1       | 0.40  | 3.56E-02 | 0.36  | 6.14E-02 |
| ELMO3         | 0.03  | 8.86E-01 | 0.36  | 6.14E-02 |
| NLRX1         | 0.34  | 7.92E-02 | 0.36  | 6.14E-02 |
| AC007246.3    | -0.07 | 7.32E-01 | -0.36 | 6.17E-02 |
| AMZ2P1        | -0.19 | 3.45E-01 | -0.36 | 6.17E-02 |
| ARHGAP1       | 0.30  | 1.27E-01 | 0.36  | 6.17E-02 |
| MAP6          | -0.23 | 2.31E-01 | -0.36 | 6.17E-02 |
| MYO9B         | -0.12 | 5.41E-01 | 0.36  | 6.17E-02 |
| OTOGL         | -0.15 | 4.47E-01 | -0.36 | 6.17E-02 |
| RFX5          | 0.34  | 7.89E-02 | 0.36  | 6.17E-02 |
| RGMB          | -0.04 | 8.23E-01 | -0.36 | 6.17E-02 |
| RP5-855D21.3  | 0.26  | 1.85E-01 | -0.36 | 6.17E-02 |
| SCN2A         | 0.11  | 5.63E-01 | 0.36  | 6.17E-02 |
| WDR35         | -0.29 | 1.34E-01 | -0.36 | 6.17E-02 |
| KRT6B         | 0.25  | 2.06E-01 | 0.36  | 6.19E-02 |
| LYNX1         | 0.16  | 4.03E-01 | 0.36  | 6.19E-02 |
| PDCD1         | 0.13  | 5.20E-01 | 0.36  | 6.19E-02 |
| RP11-277L2.3  | 0.17  | 3.81E-01 | 0.36  | 6.19E-02 |
| G10911        | -0.53 | 3.98E-03 | -0.36 | 6.19E-02 |
| PGM5P2        | 0.13  | 5.24E-01 | -0.36 | 6.19E-02 |
| C15orf59      | -0.16 | 4.13E-01 | -0.36 | 6.21E-02 |
| G25746        | -0.40 | 3.52E-02 | -0.36 | 6.21E-02 |
| LINC00920     | -0.09 | 6.63E-01 | -0.36 | 6.21E-02 |
| LONRF3        | -0.20 | 3.06E-01 | -0.36 | 6.21E-02 |
| PNPLA5        | -0.14 | 4.73E-01 | -0.36 | 6.21E-02 |
| RP11-413E1.4  | 0.22  | 2.54E-01 | -0.36 | 6.21E-02 |
| RPL30P13      | -0.14 | 4.72E-01 | -0.36 | 6.21E-02 |
| MCM3AP        | 0.13  | 4.98E-01 | 0.36  | 6.21E-02 |
| RNASEK        | -0.03 | 8.99E-01 | 0.36  | 6.21E-02 |
| RP11-624D20.1 | -0.29 | 1.41E-01 | 0.36  | 6.21E-02 |
| SPI1          | 0.06  | 7.73E-01 | 0.36  | 6.21E-02 |

|               |       |          |       |          |
|---------------|-------|----------|-------|----------|
| TRIM38        | 0.43  | 2.15E-02 | 0.36  | 6.21E-02 |
| FHL3          | 0.20  | 3.02E-01 | 0.36  | 6.24E-02 |
| IFI44         | 0.32  | 1.01E-01 | 0.36  | 6.24E-02 |
| LRRC34        | -0.09 | 6.38E-01 | -0.36 | 6.24E-02 |
| RP11-459E5.1  | -0.10 | 6.01E-01 | -0.36 | 6.24E-02 |
| SLC47A2       | -0.21 | 2.82E-01 | -0.36 | 6.24E-02 |
| SSH2          | -0.18 | 3.55E-01 | 0.36  | 6.24E-02 |
| ZNF217        | 0.36  | 5.82E-02 | 0.36  | 6.24E-02 |
| CHAC1         | 0.41  | 2.95E-02 | 0.36  | 6.26E-02 |
| GRB10         | -0.02 | 9.36E-01 | 0.36  | 6.26E-02 |
| CCAT2         | 0.16  | 4.18E-01 | -0.36 | 6.26E-02 |
| RP11-16P20.4  | -0.24 | 2.19E-01 | -0.36 | 6.26E-02 |
| RP11-813F20.4 | 0.07  | 7.07E-01 | -0.36 | 6.26E-02 |
| C19orf25      | 0.24  | 2.09E-01 | 0.36  | 6.29E-02 |
| CRCP          | 0.22  | 2.51E-01 | 0.36  | 6.29E-02 |
| CTB-147C22.8  | -0.14 | 4.72E-01 | -0.36 | 6.29E-02 |
| G40762        | 0.21  | 2.73E-01 | 0.36  | 6.29E-02 |
| LRRTM3        | 0.13  | 5.01E-01 | -0.36 | 6.29E-02 |
| MIR130A       | -0.17 | 3.98E-01 | -0.36 | 6.29E-02 |
| ZNF658        | -0.02 | 9.33E-01 | -0.36 | 6.29E-02 |
| CARKD         | 0.06  | 7.65E-01 | 0.36  | 6.31E-02 |
| G19448        | 0.02  | 9.35E-01 | -0.36 | 6.31E-02 |
| G38700        | 0.24  | 2.09E-01 | 0.36  | 6.31E-02 |
| LRP5          | -0.10 | 6.26E-01 | 0.36  | 6.31E-02 |
| NHLRC2        | 0.07  | 7.05E-01 | -0.36 | 6.31E-02 |
| PCK2          | 0.13  | 5.06E-01 | 0.36  | 6.31E-02 |
| RP11-274H2.5  | 0.06  | 7.48E-01 | -0.36 | 6.31E-02 |
| SMG1P4        | -0.31 | 1.11E-01 | 0.36  | 6.31E-02 |
| CYP4F35P      | -0.31 | 1.03E-01 | -0.36 | 6.33E-02 |
| DEDD2         | -0.03 | 8.79E-01 | 0.36  | 6.33E-02 |
| HSPE1P5       | 0.00  | 9.98E-01 | 0.36  | 6.33E-02 |
| SGK1          | 0.32  | 9.24E-02 | 0.36  | 6.33E-02 |
| ZNF818P       | -0.42 | 2.77E-02 | -0.36 | 6.33E-02 |
| ATP2B1        | -0.22 | 2.59E-01 | -0.36 | 6.36E-02 |
| G2523         | 0.01  | 9.58E-01 | -0.36 | 6.36E-02 |
| LINC01285     | 0.06  | 7.81E-01 | -0.36 | 6.36E-02 |
| PER3          | -0.34 | 7.64E-02 | -0.36 | 6.36E-02 |
| RAB39B        | -0.10 | 6.27E-01 | -0.36 | 6.36E-02 |
| RP1-199J3.6   | -0.01 | 9.55E-01 | -0.36 | 6.36E-02 |
| SLC34A3       | -0.23 | 2.31E-01 | -0.36 | 6.36E-02 |
| LCE3E         | 0.24  | 2.22E-01 | 0.36  | 6.36E-02 |
| MTA3          | 0.01  | 9.40E-01 | 0.36  | 6.36E-02 |
| ALOX5AP       | 0.12  | 5.38E-01 | 0.36  | 6.38E-02 |
| ARHGAP9       | 0.13  | 5.21E-01 | 0.36  | 6.38E-02 |
| G19573        | -0.04 | 8.50E-01 | 0.36  | 6.38E-02 |
| GVQW1         | 0.04  | 8.43E-01 | 0.36  | 6.38E-02 |
| KERA          | -0.07 | 7.33E-01 | -0.36 | 6.38E-02 |

|               |       |          |       |          |
|---------------|-------|----------|-------|----------|
| MIR4435-2HG   | -0.04 | 8.32E-01 | 0.36  | 6.38E-02 |
| RP11-102N12.3 | -0.04 | 8.56E-01 | 0.36  | 6.38E-02 |
| SRGAP1        | -0.25 | 1.98E-01 | -0.36 | 6.38E-02 |
| UBE3AP2       | -0.14 | 4.86E-01 | -0.36 | 6.38E-02 |
| ZBTB39        | -0.13 | 5.03E-01 | -0.36 | 6.38E-02 |
| KLHL31        | 0.03  | 8.65E-01 | -0.36 | 6.41E-02 |
| RP4-620E11.4  | 0.09  | 6.48E-01 | -0.36 | 6.41E-02 |
| SETP6         | -0.25 | 2.07E-01 | -0.36 | 6.41E-02 |
| SH3GL2        | -0.19 | 3.31E-01 | -0.36 | 6.41E-02 |
| TAS2R20       | -0.08 | 6.88E-01 | -0.36 | 6.41E-02 |
| CCDC96        | -0.24 | 2.12E-01 | 0.36  | 6.41E-02 |
| RNU2-6P       | 0.20  | 3.13E-01 | 0.36  | 6.41E-02 |
| RP11-141B14.1 | 0.13  | 4.99E-01 | 0.36  | 6.41E-02 |
| SNORA5A       | 0.09  | 6.41E-01 | 0.36  | 6.41E-02 |
| AC018693.6    | -0.33 | 8.24E-02 | -0.36 | 6.43E-02 |
| EXOC3         | 0.22  | 2.62E-01 | 0.36  | 6.43E-02 |
| FASN          | -0.03 | 8.73E-01 | -0.36 | 6.43E-02 |
| PFKL          | 0.18  | 3.48E-01 | 0.36  | 6.43E-02 |
| PRSS53        | 0.08  | 6.81E-01 | 0.36  | 6.43E-02 |
| RP11-13K12.1  | -0.03 | 8.70E-01 | 0.36  | 6.43E-02 |
| FGD6          | -0.07 | 7.18E-01 | 0.36  | 6.45E-02 |
| NACC2         | 0.01  | 9.46E-01 | 0.36  | 6.45E-02 |
| OSER1         | -0.01 | 9.60E-01 | 0.36  | 6.45E-02 |
| SEMA3F        | 0.00  | 9.85E-01 | 0.36  | 6.45E-02 |
| SGSM3         | 0.16  | 4.13E-01 | 0.36  | 6.45E-02 |
| CHP2          | -0.18 | 3.63E-01 | -0.36 | 6.45E-02 |
| RP11-24B13.2  | -0.34 | 7.61E-02 | -0.36 | 6.45E-02 |
| RP11-470P21.2 | -0.26 | 1.85E-01 | -0.36 | 6.45E-02 |
| TMIGD1        | -0.08 | 6.71E-01 | -0.36 | 6.45E-02 |
| FERMT1        | 0.39  | 4.15E-02 | 0.36  | 6.48E-02 |
| OPRL1         | 0.11  | 5.94E-01 | 0.36  | 6.48E-02 |
| TPRXL         | 0.49  | 8.57E-03 | 0.36  | 6.48E-02 |
| XLOC_001447   | -0.51 | 5.86E-03 | 0.36  | 6.48E-02 |
| CA5B          | -0.36 | 5.88E-02 | -0.36 | 6.48E-02 |
| DIRAS1        | -0.23 | 2.30E-01 | -0.36 | 6.48E-02 |
| AC138393.1    | -0.12 | 5.49E-01 | -0.36 | 6.50E-02 |
| GGACT         | 0.39  | 3.82E-02 | 0.36  | 6.50E-02 |
| KRT6C         | 0.14  | 4.73E-01 | 0.36  | 6.50E-02 |
| RP1-30M3.6    | -0.25 | 1.91E-01 | -0.36 | 6.50E-02 |
| RP11-1072A3.3 | -0.28 | 1.56E-01 | -0.36 | 6.50E-02 |
| RP11-533E19.7 | 0.17  | 3.86E-01 | 0.36  | 6.50E-02 |
| SNORD39       | 0.25  | 2.08E-01 | 0.36  | 6.50E-02 |
| WEE2          | 0.18  | 3.64E-01 | -0.36 | 6.50E-02 |
| ATXN3         | -0.28 | 1.50E-01 | -0.36 | 6.53E-02 |
| CDC73         | 0.04  | 8.48E-01 | -0.36 | 6.53E-02 |
| KLHL10        | 0.09  | 6.53E-01 | -0.36 | 6.53E-02 |
| P3H3          | -0.21 | 2.72E-01 | -0.36 | 6.53E-02 |

|                  |       |          |       |          |
|------------------|-------|----------|-------|----------|
| RGCC             | -0.11 | 5.61E-01 | -0.36 | 6.53E-02 |
| RP11-259G18.1    | -0.11 | 5.76E-01 | -0.36 | 6.53E-02 |
| AC008592.8       | 0.01  | 9.78E-01 | 0.36  | 6.53E-02 |
| PINLYP           | -0.16 | 4.05E-01 | 0.36  | 6.53E-02 |
| SLC16A3          | 0.06  | 7.51E-01 | 0.36  | 6.53E-02 |
| G31022           | 0.35  | 6.73E-02 | -0.36 | 6.55E-02 |
| GAS2L1           | 0.11  | 5.61E-01 | -0.36 | 6.55E-02 |
| IRGQ             | 0.17  | 3.82E-01 | 0.36  | 6.55E-02 |
| RP11-1396O13.2   | -0.33 | 8.87E-02 | -0.36 | 6.55E-02 |
| RP11-471B22.3    | 0.00  | 9.89E-01 | 0.36  | 6.55E-02 |
| RP5-1172N10.2    | -0.03 | 8.97E-01 | -0.36 | 6.55E-02 |
| SGPP1            | -0.15 | 4.41E-01 | -0.36 | 6.55E-02 |
| CTSC             | 0.36  | 5.74E-02 | 0.36  | 6.58E-02 |
| G13882           | -0.01 | 9.53E-01 | 0.36  | 6.58E-02 |
| G3793            | -0.12 | 5.34E-01 | -0.36 | 6.58E-02 |
| GBP3             | 0.14  | 4.67E-01 | 0.36  | 6.58E-02 |
| LINC00891        | 0.09  | 6.45E-01 | 0.36  | 6.58E-02 |
| MTMR6            | 0.07  | 7.29E-01 | -0.36 | 6.58E-02 |
| RP5-1157M23.2    | -0.13 | 5.00E-01 | 0.36  | 6.58E-02 |
| SAMD10           | 0.10  | 6.04E-01 | 0.36  | 6.58E-02 |
| SOX2             | 0.42  | 2.47E-02 | 0.36  | 6.58E-02 |
| SPATA3-AS1       | -0.01 | 9.64E-01 | 0.36  | 6.58E-02 |
| TCEAL7           | 0.19  | 3.34E-01 | -0.36 | 6.58E-02 |
| ALG1L6P          | -0.24 | 2.24E-01 | -0.36 | 6.60E-02 |
| CRB1             | 0.16  | 4.15E-01 | -0.36 | 6.60E-02 |
| DSG2-AS1         | -0.07 | 7.29E-01 | -0.36 | 6.60E-02 |
| RP11-191A15.2    | -0.29 | 1.33E-01 | -0.36 | 6.60E-02 |
| RP11-338N10.3    | 0.30  | 1.21E-01 | -0.36 | 6.60E-02 |
| RXRG             | -0.21 | 2.94E-01 | -0.36 | 6.60E-02 |
| kbac-BPG299F13.1 | 0.09  | 6.42E-01 | -0.36 | 6.60E-02 |
| ZNF736           | -0.02 | 9.01E-01 | -0.36 | 6.60E-02 |
| ATF6B            | 0.15  | 4.34E-01 | 0.36  | 6.60E-02 |
| LMTK3            | 0.11  | 5.85E-01 | 0.36  | 6.60E-02 |
| PLEKHG3          | 0.15  | 4.44E-01 | 0.36  | 6.60E-02 |
| RNU4-1           | -0.03 | 8.89E-01 | 0.36  | 6.60E-02 |
| ADCY3            | 0.16  | 4.11E-01 | 0.36  | 6.63E-02 |
| RP11-324I22.3    | -0.16 | 4.16E-01 | 0.36  | 6.63E-02 |
| ZSWIM8           | 0.05  | 7.93E-01 | 0.36  | 6.63E-02 |
| RNU6-759P        | -0.21 | 2.86E-01 | -0.36 | 6.63E-02 |
| RP11-25D3.1      | -0.29 | 1.33E-01 | -0.36 | 6.63E-02 |
| UBAC2-AS1        | -0.10 | 6.31E-01 | -0.36 | 6.63E-02 |
| ZNF717           | -0.24 | 2.13E-01 | -0.36 | 6.63E-02 |
| CASP4            | 0.37  | 5.25E-02 | 0.36  | 6.65E-02 |
| IRF3             | 0.11  | 5.87E-01 | 0.36  | 6.65E-02 |
| PPARGC1A         | -0.30 | 1.27E-01 | -0.36 | 6.65E-02 |
| RAB11FIP2        | -0.04 | 8.28E-01 | -0.36 | 6.65E-02 |
| RP11-1080G15.1   | 0.09  | 6.50E-01 | -0.36 | 6.65E-02 |

|                       |       |          |       |          |
|-----------------------|-------|----------|-------|----------|
| <b>RP11-708J19.3</b>  | 0.11  | 5.64E-01 | -0.36 | 6.65E-02 |
| SSBP3                 | 0.18  | 3.64E-01 | 0.36  | 6.65E-02 |
| ANXA2R                | 0.40  | 3.48E-02 | 0.36  | 6.67E-02 |
| DLGAP1-AS5            | -0.23 | 2.35E-01 | -0.36 | 6.67E-02 |
| NDNF                  | -0.37 | 5.54E-02 | -0.36 | 6.67E-02 |
| <b>RP11-430H10.1</b>  | -0.08 | 6.97E-01 | -0.36 | 6.67E-02 |
| SNORA53               | 0.11  | 5.65E-01 | 0.36  | 6.67E-02 |
| ANKFN1                | -0.40 | 3.55E-02 | -0.36 | 6.70E-02 |
| CES1                  | -0.34 | 8.10E-02 | -0.36 | 6.70E-02 |
| DDAH1                 | 0.11  | 5.71E-01 | -0.36 | 6.70E-02 |
| <b>AC187652.1</b>     | -0.19 | 3.25E-01 | 0.36  | 6.70E-02 |
| NIPSNAP1              | 0.29  | 1.40E-01 | 0.36  | 6.70E-02 |
| NRBF2                 | 0.37  | 5.20E-02 | 0.36  | 6.70E-02 |
| PTPN7                 | 0.53  | 3.93E-03 | 0.36  | 6.70E-02 |
| SLCO2B1               | -0.02 | 9.09E-01 | 0.36  | 6.70E-02 |
| SNORA75               | 0.04  | 8.37E-01 | 0.36  | 6.70E-02 |
| ADGRG1                | 0.36  | 5.99E-02 | 0.36  | 6.72E-02 |
| CHRM5                 | 0.03  | 8.69E-01 | -0.36 | 6.72E-02 |
| <b>CTD-2527I21.15</b> | -0.15 | 4.42E-01 | -0.36 | 6.72E-02 |
| DOC2A                 | 0.44  | 1.90E-02 | -0.36 | 6.72E-02 |
| FCGR3A                | 0.11  | 5.88E-01 | 0.36  | 6.72E-02 |
| FOXS1                 | -0.12 | 5.41E-01 | 0.36  | 6.72E-02 |
| G38234                | -0.03 | 8.90E-01 | 0.36  | 6.72E-02 |
| <b>RP11-327F22.2</b>  | 0.28  | 1.50E-01 | -0.36 | 6.72E-02 |
| SLC12A9               | 0.00  | 9.89E-01 | 0.36  | 6.72E-02 |
| SMTN                  | 0.29  | 1.36E-01 | 0.36  | 6.72E-02 |
| MED14OS               | 0.21  | 2.80E-01 | -0.36 | 6.75E-02 |
| <b>CTC-526N19.1</b>   | 0.30  | 1.17E-01 | 0.36  | 6.75E-02 |
| FCHSD1                | 0.32  | 9.93E-02 | 0.36  | 6.75E-02 |
| GSDMA                 | 0.23  | 2.40E-01 | 0.36  | 6.75E-02 |
| <b>XLOC_008935</b>    | 0.14  | 4.75E-01 | 0.36  | 6.75E-02 |
| G39184                | -0.07 | 7.29E-01 | -0.36 | 6.78E-02 |
| IGHG2                 | 0.39  | 3.89E-02 | 0.36  | 6.78E-02 |
| KRT24                 | 0.13  | 5.05E-01 | 0.36  | 6.78E-02 |
| <b>RP11-159D12.6</b>  | 0.25  | 1.93E-01 | 0.36  | 6.78E-02 |
| SH3BP2                | 0.01  | 9.46E-01 | -0.36 | 6.78E-02 |
| SMAD4                 | 0.00  | 9.82E-01 | -0.36 | 6.78E-02 |
| STK31                 | 0.00  | 9.88E-01 | -0.36 | 6.78E-02 |
| <b>CTD-2173L22.4</b>  | 0.06  | 7.67E-01 | -0.36 | 6.80E-02 |
| IL34                  | -0.26 | 1.77E-01 | -0.36 | 6.80E-02 |
| LRRC49                | -0.10 | 6.26E-01 | -0.36 | 6.80E-02 |
| PRDM2                 | 0.03  | 8.87E-01 | 0.36  | 6.80E-02 |
| <b>RP11-481C4.1</b>   | -0.30 | 1.20E-01 | 0.36  | 6.80E-02 |
| SLC24A4               | -0.05 | 8.00E-01 | 0.36  | 6.80E-02 |
| TCIRG1                | 0.04  | 8.56E-01 | 0.36  | 6.80E-02 |
| TDRD12                | 0.04  | 8.38E-01 | -0.36 | 6.80E-02 |
| TRAPPC13              | 0.20  | 3.06E-01 | -0.36 | 6.80E-02 |

|               |       |          |       |          |
|---------------|-------|----------|-------|----------|
| ZNF24         | -0.01 | 9.44E-01 | -0.36 | 6.80E-02 |
| GBA           | 0.38  | 4.62E-02 | 0.36  | 6.83E-02 |
| GZMA          | 0.02  | 9.13E-01 | 0.36  | 6.83E-02 |
| TMEM185A      | 0.18  | 3.66E-01 | 0.36  | 6.83E-02 |
| LIX1          | 0.35  | 7.03E-02 | -0.36 | 6.83E-02 |
| AL713999.1    | -0.14 | 4.66E-01 | 0.36  | 6.85E-02 |
| CD3G          | 0.36  | 6.24E-02 | 0.36  | 6.85E-02 |
| GRAMD3        | -0.13 | 5.26E-01 | -0.36 | 6.85E-02 |
| HOXC13-AS     | 0.60  | 8.06E-04 | 0.36  | 6.85E-02 |
| LURAP1        | -0.10 | 6.09E-01 | 0.36  | 6.85E-02 |
| P4HTM         | -0.25 | 2.05E-01 | -0.36 | 6.85E-02 |
| PAN3-AS1      | 0.19  | 3.26E-01 | 0.36  | 6.85E-02 |
| RP5-115904.2  | 0.21  | 2.95E-01 | -0.36 | 6.85E-02 |
| SIRPB1        | 0.06  | 7.57E-01 | 0.36  | 6.85E-02 |
| SMG9          | 0.19  | 3.46E-01 | 0.36  | 6.85E-02 |
| WWC2-AS2      | 0.05  | 7.91E-01 | 0.36  | 6.85E-02 |
| ZMYM4         | 0.24  | 2.11E-01 | 0.36  | 6.85E-02 |
| GIT1          | -0.02 | 9.02E-01 | 0.36  | 6.88E-02 |
| HS3ST2        | 0.17  | 3.92E-01 | 0.36  | 6.88E-02 |
| NAGS          | 0.30  | 1.18E-01 | 0.36  | 6.88E-02 |
| NEU2          | 0.19  | 3.37E-01 | 0.36  | 6.88E-02 |
| PLBD1         | 0.24  | 2.28E-01 | 0.36  | 6.88E-02 |
| RP11-394I13.1 | -0.11 | 5.76E-01 | 0.36  | 6.88E-02 |
| CNDP1         | -0.09 | 6.43E-01 | -0.36 | 6.88E-02 |
| NMNAT2        | -0.35 | 7.15E-02 | -0.36 | 6.88E-02 |
| RP11-452J6.2  | -0.12 | 5.41E-01 | -0.36 | 6.88E-02 |
| RP11-848P1.9  | -0.02 | 9.02E-01 | -0.36 | 6.88E-02 |
| RP5-1120P11.4 | -0.35 | 7.03E-02 | -0.36 | 6.88E-02 |
| AC002310.10   | 0.23  | 2.39E-01 | 0.36  | 6.90E-02 |
| AC091177.1    | 0.26  | 1.78E-01 | -0.36 | 6.90E-02 |
| BNIP3P22      | 0.00  | 9.86E-01 | -0.36 | 6.90E-02 |
| DUSP18        | 0.00  | 9.80E-01 | 0.36  | 6.90E-02 |
| FMNL1         | 0.11  | 5.82E-01 | 0.36  | 6.90E-02 |
| HAS3          | 0.21  | 2.85E-01 | 0.36  | 6.90E-02 |
| HEATR5B       | -0.26 | 1.80E-01 | -0.36 | 6.90E-02 |
| LONRF2        | -0.04 | 8.45E-01 | -0.36 | 6.90E-02 |
| MYADM         | -0.40 | 3.33E-02 | -0.36 | 6.90E-02 |
| PAPD7         | -0.02 | 9.18E-01 | -0.36 | 6.90E-02 |
| RAB28         | -0.02 | 9.14E-01 | -0.36 | 6.90E-02 |
| RP11-505C13.1 | -0.06 | 7.80E-01 | -0.36 | 6.90E-02 |
| RP11-53019.1  | -0.29 | 1.37E-01 | -0.36 | 6.90E-02 |
| S100A8        | 0.21  | 2.81E-01 | 0.36  | 6.90E-02 |
| SHISA9        | 0.20  | 3.09E-01 | -0.36 | 6.90E-02 |
| TDH           | 0.04  | 8.54E-01 | 0.36  | 6.90E-02 |
| CLEC18A       | 0.06  | 7.79E-01 | -0.35 | 6.93E-02 |
| MCF2L-AS1     | 0.02  | 9.15E-01 | -0.35 | 6.93E-02 |
| RP11-119F19.5 | -0.28 | 1.51E-01 | -0.35 | 6.93E-02 |

|                      |       |          |       |          |
|----------------------|-------|----------|-------|----------|
| <b>RP11-478B9.2</b>  | -0.27 | 1.68E-01 | -0.35 | 6.93E-02 |
| <b>HAL</b>           | 0.13  | 4.93E-01 | 0.35  | 6.93E-02 |
| <b>KAZALD1</b>       | -0.12 | 5.54E-01 | 0.35  | 6.93E-02 |
| <b>LASP1</b>         | 0.20  | 3.16E-01 | 0.35  | 6.93E-02 |
| <b>ZNF710</b>        | 0.29  | 1.31E-01 | 0.35  | 6.93E-02 |
| <b>AC145124.2</b>    | 0.08  | 6.95E-01 | 0.35  | 6.95E-02 |
| <b>ARPC1B</b>        | 0.22  | 2.71E-01 | 0.35  | 6.95E-02 |
| <b>FGFR2</b>         | 0.16  | 4.10E-01 | 0.35  | 6.95E-02 |
| <b>GIF</b>           | -0.02 | 9.28E-01 | 0.35  | 6.95E-02 |
| <b>KIAA1549L</b>     | -0.49 | 8.75E-03 | -0.35 | 6.95E-02 |
| <b>RHOH</b>          | 0.03  | 8.78E-01 | 0.35  | 6.98E-02 |
| <b>RNF14</b>         | 0.45  | 1.61E-02 | 0.35  | 6.98E-02 |
| <b>RP11-15A1.4</b>   | -0.20 | 3.17E-01 | 0.35  | 6.98E-02 |
| <b>KCNJ14</b>        | -0.04 | 8.51E-01 | -0.35 | 7.01E-02 |
| <b>RNF217</b>        | -0.15 | 4.43E-01 | -0.35 | 7.01E-02 |
| <b>IFITM3</b>        | 0.17  | 3.93E-01 | 0.35  | 7.01E-02 |
| <b>RP11-327F22.1</b> | 0.22  | 2.58E-01 | 0.35  | 7.01E-02 |
| <b>RBBP4P2</b>       | -0.04 | 8.27E-01 | -0.35 | 7.03E-02 |
| <b>RP11-114N19.3</b> | -0.04 | 8.51E-01 | -0.35 | 7.03E-02 |
| <b>RP5-1023B21.1</b> | 0.04  | 8.54E-01 | -0.35 | 7.03E-02 |
| <b>SCARA3</b>        | -0.17 | 3.75E-01 | -0.35 | 7.03E-02 |
| <b>AC005537.2</b>    | 0.47  | 1.17E-02 | 0.35  | 7.06E-02 |
| <b>ADPRH</b>         | 0.00  | 9.99E-01 | 0.35  | 7.06E-02 |
| <b>KRT13</b>         | -0.09 | 6.41E-01 | 0.35  | 7.06E-02 |
| <b>NPC1</b>          | 0.11  | 5.72E-01 | 0.35  | 7.06E-02 |
| <b>RP11-378E13.3</b> | -0.01 | 9.47E-01 | 0.35  | 7.06E-02 |
| <b>SLC52A3</b>       | 0.21  | 2.80E-01 | 0.35  | 7.06E-02 |
| <b>TSPAN15</b>       | 0.18  | 3.65E-01 | 0.35  | 7.06E-02 |
| <b>KCNIP4</b>        | -0.09 | 6.47E-01 | -0.35 | 7.06E-02 |
| <b>PDIK1L</b>        | -0.14 | 4.82E-01 | -0.35 | 7.06E-02 |
| <b>RP11-120K24.5</b> | -0.08 | 6.99E-01 | -0.35 | 7.06E-02 |
| <b>RP11-15L13.4</b>  | -0.08 | 6.77E-01 | -0.35 | 7.06E-02 |
| <b>RP11-167H9.4</b>  | -0.13 | 5.17E-01 | -0.35 | 7.06E-02 |
| <b>RP5-1063M23.2</b> | -0.40 | 3.72E-02 | -0.35 | 7.06E-02 |
| <b>AHCYL2</b>        | 0.08  | 6.81E-01 | -0.35 | 7.08E-02 |
| <b>CATSPERG</b>      | -0.34 | 7.95E-02 | -0.35 | 7.08E-02 |
| <b>G38113</b>        | -0.27 | 1.63E-01 | -0.35 | 7.08E-02 |
| <b>NPY5R</b>         | -0.40 | 3.49E-02 | -0.35 | 7.08E-02 |
| <b>SCRN1</b>         | 0.03  | 8.62E-01 | 0.35  | 7.08E-02 |
| <b>ZNF575</b>        | -0.29 | 1.33E-01 | 0.35  | 7.08E-02 |
| <b>RNU7-96P</b>      | 0.08  | 6.96E-01 | -0.35 | 7.11E-02 |
| <b>RP11-22C11.1</b>  | -0.12 | 5.56E-01 | -0.35 | 7.11E-02 |
| <b>TAS2R6P</b>       | -0.03 | 8.68E-01 | -0.35 | 7.11E-02 |
| <b>C19orf54</b>      | -0.05 | 7.84E-01 | 0.35  | 7.11E-02 |
| <b>CORO2A</b>        | 0.37  | 5.52E-02 | 0.35  | 7.11E-02 |
| <b>SUSD1</b>         | 0.29  | 1.36E-01 | 0.35  | 7.11E-02 |
| <b>TMEM241</b>       | 0.36  | 5.92E-02 | 0.35  | 7.11E-02 |



|                |       |          |       |          |
|----------------|-------|----------|-------|----------|
| YPEL3          | -0.03 | 8.73E-01 | 0.35  | 7.11E-02 |
| CRBN           | -0.18 | 3.48E-01 | -0.35 | 7.14E-02 |
| IL1RAPL1       | -0.40 | 3.28E-02 | -0.35 | 7.14E-02 |
| RPL17P50       | -0.21 | 2.84E-01 | -0.35 | 7.14E-02 |
| LINC01296      | -0.09 | 6.64E-01 | 0.35  | 7.14E-02 |
| RP11-15E18.5   | 0.21  | 2.93E-01 | 0.35  | 7.14E-02 |
| RP11-512M8.11  | -0.17 | 3.93E-01 | 0.35  | 7.14E-02 |
| RP11-809O17.1  | 0.37  | 5.35E-02 | 0.35  | 7.14E-02 |
| WDR6           | -0.02 | 9.33E-01 | 0.35  | 7.14E-02 |
| XX-FW83563B9.5 | 0.24  | 2.20E-01 | 0.35  | 7.14E-02 |
| AP001350.4     | -0.06 | 7.55E-01 | -0.35 | 7.16E-02 |
| C1orf145       | 0.17  | 3.96E-01 | -0.35 | 7.16E-02 |
| FLOT1          | -0.12 | 5.35E-01 | 0.35  | 7.16E-02 |
| GREM2          | -0.39 | 3.92E-02 | -0.35 | 7.16E-02 |
| ITPRIPL2       | 0.13  | 5.00E-01 | 0.35  | 7.16E-02 |
| RHOU           | 0.19  | 3.27E-01 | -0.35 | 7.16E-02 |
| RP11-1060G2.1  | 0.01  | 9.49E-01 | 0.35  | 7.16E-02 |
| SCO2           | 0.39  | 3.77E-02 | 0.35  | 7.16E-02 |
| XLOC_010311    | -0.38 | 4.41E-02 | -0.35 | 7.16E-02 |
| ZBTB17         | 0.17  | 3.76E-01 | 0.35  | 7.16E-02 |
| HMG2P8         | -0.15 | 4.51E-01 | -0.35 | 7.19E-02 |
| KRT79          | 0.00  | 9.96E-01 | -0.35 | 7.19E-02 |
| SNORA63        | 0.08  | 6.71E-01 | 0.35  | 7.19E-02 |
| CTD-2530N21.5  | 0.11  | 5.66E-01 | -0.35 | 7.21E-02 |
| G5146          | -0.06 | 7.80E-01 | -0.35 | 7.21E-02 |
| TTC3-AS1       | -0.14 | 4.88E-01 | -0.35 | 7.21E-02 |
| C2orf16        | 0.23  | 2.34E-01 | 0.35  | 7.21E-02 |
| CD47           | 0.26  | 1.85E-01 | 0.35  | 7.24E-02 |
| ZMYM3          | 0.16  | 4.29E-01 | 0.35  | 7.24E-02 |
| CACNA1S        | -0.22 | 2.50E-01 | -0.35 | 7.24E-02 |
| LINC00282      | 0.33  | 8.92E-02 | -0.35 | 7.24E-02 |
| ORC3           | -0.22 | 2.66E-01 | -0.35 | 7.24E-02 |
| PRR33          | -0.40 | 3.43E-02 | -0.35 | 7.24E-02 |
| CTD-3035D6.1   | 0.34  | 7.24E-02 | 0.35  | 7.27E-02 |
| CTSD           | 0.27  | 1.61E-01 | 0.35  | 7.27E-02 |
| HSD3B7         | -0.06 | 7.79E-01 | 0.35  | 7.27E-02 |
| PCNPP5         | -0.20 | 3.15E-01 | -0.35 | 7.27E-02 |
| RAD1           | 0.16  | 4.24E-01 | -0.35 | 7.27E-02 |
| SLA            | 0.32  | 9.56E-02 | 0.35  | 7.27E-02 |
| SLC7A8         | -0.14 | 4.82E-01 | 0.35  | 7.27E-02 |
| TIRAP          | -0.03 | 8.76E-01 | 0.35  | 7.27E-02 |
| ABCB11         | 0.24  | 2.22E-01 | -0.35 | 7.29E-02 |
| C7orf49        | 0.22  | 2.60E-01 | 0.35  | 7.29E-02 |
| DACT1          | -0.08 | 6.83E-01 | -0.35 | 7.29E-02 |
| MYH16          | -0.15 | 4.57E-01 | -0.35 | 7.29E-02 |
| RP11-70D24.2   | 0.02  | 9.12E-01 | 0.35  | 7.29E-02 |
| ACKR2          | 0.03  | 8.76E-01 | 0.35  | 7.32E-02 |

|                      |       |          |       |          |
|----------------------|-------|----------|-------|----------|
| <b>ADRB2</b>         | -0.20 | 2.98E-01 | -0.35 | 7.32E-02 |
| <b>AL161645.2</b>    | 0.02  | 9.24E-01 | 0.35  | 7.32E-02 |
| <b>CUX1</b>          | 0.15  | 4.46E-01 | 0.35  | 7.32E-02 |
| <b>RP11-72M17.1</b>  | -0.06 | 7.58E-01 | -0.35 | 7.32E-02 |
| <b>TMBIM1</b>        | 0.18  | 3.60E-01 | 0.35  | 7.32E-02 |
| <b>MEST</b>          | -0.21 | 2.79E-01 | -0.35 | 7.35E-02 |
| <b>MOB1B</b>         | 0.27  | 1.67E-01 | -0.35 | 7.35E-02 |
| <b>RP11-230F18.6</b> | -0.10 | 6.07E-01 | -0.35 | 7.35E-02 |
| <b>RP11-304F15.5</b> | 0.00  | 9.91E-01 | -0.35 | 7.35E-02 |
| <b>RP11-395N3.2</b>  | -0.18 | 3.53E-01 | -0.35 | 7.35E-02 |
| <b>CCL13</b>         | -0.15 | 4.35E-01 | 0.35  | 7.35E-02 |
| <b>RNU5F-1</b>       | 0.17  | 3.99E-01 | 0.35  | 7.35E-02 |
| <b>TRIM16L</b>       | 0.19  | 3.29E-01 | 0.35  | 7.35E-02 |
| <b>CATSPERD</b>      | 0.22  | 2.56E-01 | -0.35 | 7.37E-02 |
| <b>CEP192</b>        | 0.02  | 9.03E-01 | -0.35 | 7.37E-02 |
| <b>GPX3</b>          | 0.15  | 4.54E-01 | 0.35  | 7.37E-02 |
| <b>LBHD1</b>         | 0.01  | 9.54E-01 | 0.35  | 7.37E-02 |
| <b>RP11-798M19.3</b> | -0.14 | 4.71E-01 | -0.35 | 7.37E-02 |
| <b>WNT3A</b>         | -0.27 | 1.67E-01 | -0.35 | 7.37E-02 |
| <b>ZNF524</b>        | 0.05  | 8.00E-01 | 0.35  | 7.37E-02 |
| <b>C4orf36</b>       | -0.04 | 8.39E-01 | 0.35  | 7.40E-02 |
| <b>LINC01003</b>     | 0.03  | 8.63E-01 | -0.35 | 7.40E-02 |
| <b>MAP1LC3B2</b>     | -0.41 | 3.22E-02 | 0.35  | 7.40E-02 |
| <b>PDLIM4</b>        | -0.18 | 3.67E-01 | -0.35 | 7.40E-02 |
| <b>PHIP</b>          | -0.12 | 5.38E-01 | -0.35 | 7.40E-02 |
| <b>RP11-92K15.3</b>  | -0.08 | 6.89E-01 | 0.35  | 7.40E-02 |
| <b>SALL1</b>         | -0.27 | 1.66E-01 | 0.35  | 7.40E-02 |
| <b>ZNF420</b>        | 0.01  | 9.61E-01 | -0.35 | 7.40E-02 |
| <b>C1QTNF1</b>       | -0.05 | 7.88E-01 | 0.35  | 7.43E-02 |
| <b>FHL5</b>          | -0.25 | 2.02E-01 | 0.35  | 7.43E-02 |
| <b>MMP13</b>         | -0.03 | 8.67E-01 | 0.35  | 7.43E-02 |
| <b>MORC2</b>         | 0.01  | 9.70E-01 | 0.35  | 7.43E-02 |
| <b>NID1</b>          | -0.04 | 8.32E-01 | 0.35  | 7.43E-02 |
| <b>OSM</b>           | 0.00  | 9.89E-01 | 0.35  | 7.43E-02 |
| <b>RP11-96D1.7</b>   | 0.21  | 2.94E-01 | -0.35 | 7.43E-02 |
| <b>RP4-655J12.4</b>  | -0.04 | 8.21E-01 | -0.35 | 7.43E-02 |
| <b>VGf</b>           | -0.25 | 1.98E-01 | -0.35 | 7.43E-02 |
| <b>ZGRF1</b>         | 0.09  | 6.54E-01 | -0.35 | 7.43E-02 |
| <b>AGAP3</b>         | 0.22  | 2.57E-01 | 0.35  | 7.46E-02 |
| <b>CD8A</b>          | 0.23  | 2.31E-01 | 0.35  | 7.46E-02 |
| <b>PDK3</b>          | 0.12  | 5.55E-01 | 0.35  | 7.46E-02 |
| <b>PRG4</b>          | -0.24 | 2.26E-01 | 0.35  | 7.46E-02 |
| <b>AC011290.5</b>    | -0.08 | 6.76E-01 | -0.35 | 7.46E-02 |
| <b>AMER1</b>         | 0.08  | 6.95E-01 | -0.35 | 7.46E-02 |
| <b>CTC-260E6.4</b>   | -0.17 | 3.82E-01 | -0.35 | 7.46E-02 |
| <b>LINC01091</b>     | -0.45 | 1.74E-02 | -0.35 | 7.46E-02 |
| <b>RN7SL426P</b>     | 0.03  | 8.92E-01 | -0.35 | 7.46E-02 |

|              |       |          |       |          |
|--------------|-------|----------|-------|----------|
| SENP6        | 0.11  | 5.84E-01 | -0.35 | 7.46E-02 |
| NOVA2        | -0.28 | 1.42E-01 | 0.35  | 7.48E-02 |
| ROCK1P1      | -0.44 | 2.02E-02 | 0.35  | 7.48E-02 |
| RP11-823P9.4 | -0.15 | 4.34E-01 | 0.35  | 7.48E-02 |
| RPL41P5      | 0.19  | 3.25E-01 | 0.35  | 7.48E-02 |
| PRKAG2-AS1   | -0.70 | 3.88E-05 | -0.35 | 7.48E-02 |
| TANK         | 0.32  | 1.01E-01 | -0.35 | 7.48E-02 |
| CTC-428G20.2 | 0.21  | 2.93E-01 | -0.35 | 7.51E-02 |
| ITPRIPL1     | -0.10 | 6.17E-01 | 0.35  | 7.51E-02 |
| NARF         | -0.10 | 6.16E-01 | 0.35  | 7.51E-02 |
| RGS9         | -0.11 | 5.72E-01 | -0.35 | 7.51E-02 |
| RP11-91P24.6 | -0.21 | 2.84E-01 | -0.35 | 7.51E-02 |
| RP11-95I19.1 | 0.08  | 6.93E-01 | 0.35  | 7.51E-02 |
| SMOX         | 0.09  | 6.35E-01 | 0.35  | 7.51E-02 |
| TMEM9        | 0.12  | 5.42E-01 | 0.35  | 7.51E-02 |
| EPB41L4B     | -0.11 | 5.61E-01 | -0.35 | 7.54E-02 |
| FAM19A2      | -0.28 | 1.45E-01 | -0.35 | 7.54E-02 |
| PAPPA2       | -0.37 | 5.01E-02 | -0.35 | 7.54E-02 |
| RP11-19G24.2 | -0.33 | 8.37E-02 | -0.35 | 7.54E-02 |
| RP11-583F2.6 | -0.01 | 9.45E-01 | -0.35 | 7.54E-02 |
| SOX11        | 0.13  | 5.16E-01 | -0.35 | 7.54E-02 |
| AC067940.1   | 0.07  | 7.22E-01 | 0.35  | 7.54E-02 |
| AC008686.1   | -0.17 | 3.88E-01 | -0.35 | 7.56E-02 |
| AC226118.1   | 0.00  | 9.92E-01 | -0.35 | 7.56E-02 |
| OPA1-AS1     | 0.02  | 9.35E-01 | -0.35 | 7.56E-02 |
| TLDC2        | 0.06  | 7.78E-01 | -0.35 | 7.56E-02 |
| XKR6         | -0.08 | 6.96E-01 | -0.35 | 7.56E-02 |
| ZNF208       | -0.15 | 4.53E-01 | -0.35 | 7.56E-02 |
| AC114271.2   | -0.03 | 8.63E-01 | 0.35  | 7.56E-02 |
| RIT1         | 0.30  | 1.18E-01 | 0.35  | 7.56E-02 |
| EIF2AK2      | 0.22  | 2.59E-01 | 0.35  | 7.59E-02 |
| MXD4         | 0.17  | 3.97E-01 | 0.35  | 7.59E-02 |
| ZFPM1        | 0.19  | 3.30E-01 | 0.35  | 7.59E-02 |
| AC000123.3   | -0.06 | 7.68E-01 | -0.35 | 7.59E-02 |
| SLC22A31     | -0.18 | 3.49E-01 | -0.35 | 7.59E-02 |
| AC013474.4   | 0.13  | 5.11E-01 | 0.35  | 7.62E-02 |
| ERG          | 0.06  | 7.66E-01 | 0.35  | 7.62E-02 |
| FOXO1        | -0.33 | 8.59E-02 | -0.35 | 7.62E-02 |
| HMGCS2       | 0.00  | 9.93E-01 | -0.35 | 7.62E-02 |
| NKAP         | -0.12 | 5.39E-01 | -0.35 | 7.62E-02 |
| RFX3         | 0.03  | 8.94E-01 | -0.35 | 7.62E-02 |
| RNU6-36P     | 0.02  | 9.25E-01 | 0.35  | 7.62E-02 |
| RP11-356N1.2 | 0.11  | 5.81E-01 | 0.35  | 7.62E-02 |
| TIMP4        | -0.01 | 9.57E-01 | -0.35 | 7.62E-02 |
| ZNF408       | 0.23  | 2.31E-01 | 0.35  | 7.62E-02 |
| ABCG5        | 0.03  | 8.92E-01 | -0.35 | 7.65E-02 |
| DOK5         | -0.07 | 7.32E-01 | -0.35 | 7.65E-02 |

|                 |       |          |       |          |
|-----------------|-------|----------|-------|----------|
| EEF1A1P16       | -0.11 | 5.74E-01 | 0.35  | 7.65E-02 |
| KCNA1           | -0.11 | 5.78E-01 | -0.35 | 7.65E-02 |
| RABGAP1L        | -0.08 | 7.04E-01 | -0.35 | 7.65E-02 |
| AC005831.1      | 0.27  | 1.65E-01 | 0.35  | 7.68E-02 |
| GORASP1         | 0.29  | 1.41E-01 | 0.35  | 7.68E-02 |
| RP11-442N24_B.1 | 0.18  | 3.71E-01 | 0.35  | 7.68E-02 |
| VASH1           | 0.24  | 2.27E-01 | 0.35  | 7.68E-02 |
| CYP1A2          | -0.31 | 1.05E-01 | -0.35 | 7.68E-02 |
| DNAJC19         | -0.05 | 7.85E-01 | -0.35 | 7.68E-02 |
| FCGR1A          | 0.08  | 6.80E-01 | -0.35 | 7.68E-02 |
| MAG11           | -0.29 | 1.28E-01 | -0.35 | 7.68E-02 |
| RP5-906C1.1     | 0.25  | 1.95E-01 | -0.35 | 7.68E-02 |
| C4orf46         | 0.00  | 9.83E-01 | -0.35 | 7.70E-02 |
| DEPDC1          | 0.11  | 5.92E-01 | 0.35  | 7.70E-02 |
| GOLGA80         | 0.02  | 9.28E-01 | -0.35 | 7.70E-02 |
| GPR55           | 0.20  | 3.00E-01 | 0.35  | 7.70E-02 |
| HMG2P20         | -0.03 | 8.78E-01 | 0.35  | 7.70E-02 |
| SNHG25          | 0.21  | 2.75E-01 | 0.35  | 7.70E-02 |
| SNORD51         | 0.01  | 9.68E-01 | -0.35 | 7.70E-02 |
| ZNF492          | -0.07 | 7.11E-01 | -0.35 | 7.70E-02 |
| ASL             | 0.42  | 2.43E-02 | 0.35  | 7.73E-02 |
| SNORA22         | -0.16 | 4.13E-01 | 0.35  | 7.73E-02 |
| VKORC1          | 0.22  | 2.50E-01 | 0.35  | 7.73E-02 |
| C3orf17         | 0.00  | 9.89E-01 | -0.35 | 7.73E-02 |
| G38458          | -0.32 | 9.18E-02 | -0.35 | 7.73E-02 |
| GLYATL1P3       | 0.35  | 7.17E-02 | -0.35 | 7.73E-02 |
| RN7SL277P       | 0.04  | 8.21E-01 | -0.35 | 7.73E-02 |
| RP1-20C7.6      | -0.10 | 6.01E-01 | -0.35 | 7.73E-02 |
| RP11-182J1.5    | 0.01  | 9.44E-01 | -0.35 | 7.73E-02 |
| AC006539.1      | 0.07  | 7.25E-01 | -0.35 | 7.76E-02 |
| AC009948.7      | 0.01  | 9.70E-01 | -0.35 | 7.76E-02 |
| DGAT2           | 0.12  | 5.48E-01 | -0.35 | 7.76E-02 |
| DLK1            | 0.01  | 9.59E-01 | -0.35 | 7.76E-02 |
| FAM199X         | 0.11  | 5.92E-01 | -0.35 | 7.76E-02 |
| SFTPC           | -0.35 | 6.89E-02 | -0.35 | 7.76E-02 |
| SSPN            | -0.10 | 6.31E-01 | -0.35 | 7.76E-02 |
| FABP5P7         | 0.09  | 6.51E-01 | 0.35  | 7.76E-02 |
| RP11-428K3.1    | 0.07  | 7.40E-01 | 0.35  | 7.76E-02 |
| TCF4            | 0.05  | 8.04E-01 | 0.35  | 7.76E-02 |
| TTC39B          | 0.29  | 1.31E-01 | 0.35  | 7.76E-02 |
| TXLNA           | 0.10  | 5.99E-01 | 0.35  | 7.76E-02 |
| PRMT2           | 0.07  | 7.31E-01 | 0.35  | 7.79E-02 |
| RP11-182L21.6   | -0.26 | 1.90E-01 | -0.35 | 7.79E-02 |
| RP11-7K24.3     | 0.08  | 6.76E-01 | -0.35 | 7.79E-02 |
| RP5-1100I6.1    | -0.12 | 5.53E-01 | -0.35 | 7.79E-02 |
| XLOC_011384     | 0.06  | 7.65E-01 | -0.35 | 7.79E-02 |
| ZNF571          | -0.14 | 4.93E-01 | -0.35 | 7.79E-02 |

|               |       |          |       |          |
|---------------|-------|----------|-------|----------|
| ZNF853        | -0.40 | 3.51E-02 | -0.35 | 7.79E-02 |
| RP11-29H23.5  | -0.17 | 3.81E-01 | -0.34 | 7.81E-02 |
| SOX6          | -0.36 | 5.74E-02 | -0.34 | 7.81E-02 |
| AC074212.5    | -0.10 | 6.04E-01 | 0.34  | 7.81E-02 |
| CTD-3126B10.4 | 0.08  | 7.02E-01 | 0.34  | 7.81E-02 |
| G6PC3         | 0.18  | 3.49E-01 | 0.34  | 7.81E-02 |
| LINC00649     | 0.00  | 9.81E-01 | 0.34  | 7.81E-02 |
| NDST1         | 0.47  | 1.14E-02 | 0.34  | 7.81E-02 |
| RNU6-1201P    | -0.12 | 5.51E-01 | 0.34  | 7.81E-02 |
| RP11-45506.2  | -0.10 | 6.11E-01 | 0.34  | 7.81E-02 |
| UPF3AP3       | -0.25 | 1.91E-01 | 0.34  | 7.81E-02 |
| AGKP1         | 0.40  | 3.40E-02 | 0.34  | 7.84E-02 |
| CCER2         | 0.00  | 9.80E-01 | -0.34 | 7.84E-02 |
| RN7SKP203     | -0.06 | 7.46E-01 | 0.34  | 7.84E-02 |
| RP11-244M2.1  | -0.06 | 7.60E-01 | -0.34 | 7.84E-02 |
| SLC7A10       | 0.04  | 8.23E-01 | -0.34 | 7.84E-02 |
| SNORA31       | 0.02  | 9.17E-01 | -0.34 | 7.84E-02 |
| TMEM79        | 0.31  | 1.04E-01 | 0.34  | 7.84E-02 |
| XLOC_005409   | -0.03 | 8.74E-01 | -0.34 | 7.84E-02 |
| ZBTB11-AS1    | 0.11  | 5.82E-01 | 0.34  | 7.84E-02 |
| ZFYVE19       | 0.13  | 5.22E-01 | 0.34  | 7.84E-02 |
| EFCAB12       | -0.22 | 2.54E-01 | -0.34 | 7.87E-02 |
| LCOR          | 0.29  | 1.36E-01 | -0.34 | 7.87E-02 |
| RP11-367J11.2 | -0.29 | 1.38E-01 | -0.34 | 7.87E-02 |
| RP11-524O24.2 | 0.04  | 8.48E-01 | -0.34 | 7.87E-02 |
| SPAG16        | -0.11 | 5.62E-01 | -0.34 | 7.87E-02 |
| RP11-134G8.5  | 0.17  | 3.91E-01 | 0.34  | 7.87E-02 |
| TCAF2         | 0.20  | 3.00E-01 | 0.34  | 7.87E-02 |
| TKTL1         | 0.18  | 3.67E-01 | 0.34  | 7.87E-02 |
| VWA1          | 0.17  | 3.96E-01 | 0.34  | 7.87E-02 |
| C10orf54      | 0.15  | 4.40E-01 | 0.34  | 7.90E-02 |
| C7orf55       | 0.23  | 2.41E-01 | -0.34 | 7.90E-02 |
| FSCN3         | -0.06 | 7.55E-01 | -0.34 | 7.90E-02 |
| FURIN         | 0.43  | 2.30E-02 | 0.34  | 7.90E-02 |
| G16363        | 0.17  | 3.79E-01 | 0.34  | 7.90E-02 |
| G3639         | -0.01 | 9.63E-01 | 0.34  | 7.90E-02 |
| MEI4          | -0.10 | 5.99E-01 | -0.34 | 7.90E-02 |
| SH3BGR        | -0.09 | 6.48E-01 | -0.34 | 7.90E-02 |
| P2RY10        | 0.25  | 1.95E-01 | 0.34  | 7.93E-02 |
| PAQR3         | 0.05  | 8.04E-01 | -0.34 | 7.93E-02 |
| RNF213        | 0.08  | 6.92E-01 | 0.34  | 7.93E-02 |
| 4-Sep         | -0.31 | 1.12E-01 | -0.34 | 7.93E-02 |
| TSPAN9        | 0.02  | 9.28E-01 | 0.34  | 7.93E-02 |
| ZFP37         | 0.04  | 8.49E-01 | 0.34  | 7.93E-02 |
| C1R           | 0.04  | 8.37E-01 | 0.34  | 7.96E-02 |
| G36224        | 0.31  | 1.13E-01 | 0.34  | 7.96E-02 |
| SLFN5         | 0.24  | 2.26E-01 | 0.34  | 7.96E-02 |

|               |       |          |       |          |
|---------------|-------|----------|-------|----------|
| ZNF239        | -0.29 | 1.40E-01 | 0.34  | 7.96E-02 |
| ZSCAN20       | 0.19  | 3.42E-01 | 0.34  | 7.96E-02 |
| CPM           | -0.34 | 7.51E-02 | -0.34 | 7.96E-02 |
| HULC          | -0.13 | 5.10E-01 | -0.34 | 7.96E-02 |
| LARP1B        | -0.06 | 7.54E-01 | -0.34 | 7.96E-02 |
| RNU1-109P     | -0.13 | 4.93E-01 | -0.34 | 7.96E-02 |
| ZNF880        | -0.33 | 9.07E-02 | -0.34 | 7.96E-02 |
| BTN3A3        | 0.06  | 7.81E-01 | 0.34  | 7.99E-02 |
| C1orf204      | 0.30  | 1.23E-01 | 0.34  | 7.99E-02 |
| CTB-113P19.4  | 0.09  | 6.35E-01 | 0.34  | 7.99E-02 |
| CTC-203F4.2   | 0.42  | 2.54E-02 | 0.34  | 7.99E-02 |
| EVPL          | -0.04 | 8.40E-01 | 0.34  | 7.99E-02 |
| FOXJ3         | -0.18 | 3.49E-01 | -0.34 | 7.99E-02 |
| G40351        | -0.26 | 1.87E-01 | -0.34 | 7.99E-02 |
| LPAL2         | -0.25 | 2.00E-01 | -0.34 | 7.99E-02 |
| MGEA5         | -0.13 | 5.01E-01 | -0.34 | 7.99E-02 |
| NKAIN1        | 0.20  | 3.11E-01 | 0.34  | 7.99E-02 |
| NRIP3         | 0.22  | 2.66E-01 | 0.34  | 7.99E-02 |
| SLC48A1       | 0.11  | 5.63E-01 | 0.34  | 7.99E-02 |
| XRCC6BP1      | -0.08 | 6.93E-01 | -0.34 | 7.99E-02 |
| ARFIP1        | 0.11  | 5.87E-01 | -0.34 | 8.01E-02 |
| CABP7         | -0.02 | 9.15E-01 | -0.34 | 8.01E-02 |
| CPA4          | 0.09  | 6.53E-01 | 0.34  | 8.01E-02 |
| E2F5          | 0.02  | 9.27E-01 | -0.34 | 8.01E-02 |
| FBXO2         | 0.21  | 2.85E-01 | 0.34  | 8.01E-02 |
| PCDHA7        | -0.11 | 5.86E-01 | 0.34  | 8.01E-02 |
| PLPPR2        | 0.01  | 9.45E-01 | 0.34  | 8.01E-02 |
| RPL23AP7      | -0.45 | 1.75E-02 | -0.34 | 8.01E-02 |
| SNAP23        | 0.10  | 5.97E-01 | 0.34  | 8.01E-02 |
| CKAP2         | 0.21  | 2.93E-01 | 0.34  | 8.04E-02 |
| COL18A1       | 0.02  | 9.26E-01 | 0.34  | 8.04E-02 |
| EPHA1         | 0.15  | 4.46E-01 | 0.34  | 8.04E-02 |
| G25971        | 0.17  | 3.99E-01 | -0.34 | 8.04E-02 |
| G9514         | 0.16  | 4.25E-01 | -0.34 | 8.04E-02 |
| RNU6-125P     | -0.05 | 8.04E-01 | -0.34 | 8.04E-02 |
| RP11-7807.2   | -0.11 | 5.69E-01 | -0.34 | 8.04E-02 |
| RP13-991F5.2  | 0.38  | 4.36E-02 | 0.34  | 8.04E-02 |
| S100A12       | 0.37  | 5.10E-02 | 0.34  | 8.04E-02 |
| SMAD6         | 0.27  | 1.65E-01 | 0.34  | 8.04E-02 |
| ACOXL         | -0.07 | 7.21E-01 | -0.34 | 8.07E-02 |
| NEK4          | 0.20  | 3.19E-01 | -0.34 | 8.07E-02 |
| RP11-1391J7.1 | -0.21 | 2.93E-01 | -0.34 | 8.07E-02 |
| RIPK4         | 0.37  | 4.94E-02 | 0.34  | 8.07E-02 |
| AC002511.3    | 0.22  | 2.54E-01 | 0.34  | 8.10E-02 |
| C19orf44      | 0.13  | 4.94E-01 | 0.34  | 8.10E-02 |
| DLG1-AS1      | 0.08  | 7.03E-01 | 0.34  | 8.10E-02 |
| FREM2         | -0.03 | 8.68E-01 | -0.34 | 8.10E-02 |

|               |       |          |       |          |
|---------------|-------|----------|-------|----------|
| GYS1          | 0.39  | 3.76E-02 | 0.34  | 8.10E-02 |
| NPAS1         | -0.21 | 2.85E-01 | -0.34 | 8.10E-02 |
| NTRK2         | -0.22 | 2.56E-01 | 0.34  | 8.10E-02 |
| RBM4B         | 0.04  | 8.53E-01 | 0.34  | 8.10E-02 |
| RP11-456I15.2 | -0.06 | 7.60E-01 | -0.34 | 8.10E-02 |
| SAMD12        | -0.28 | 1.52E-01 | -0.34 | 8.10E-02 |
| SSX2IP        | -0.03 | 8.86E-01 | -0.34 | 8.10E-02 |
| ZNF749        | -0.19 | 3.24E-01 | -0.34 | 8.10E-02 |
| LCE3A         | 0.37  | 5.21E-02 | 0.34  | 8.13E-02 |
| PTPN6         | 0.33  | 8.45E-02 | 0.34  | 8.13E-02 |
| PTPRG         | -0.13 | 5.04E-01 | 0.34  | 8.13E-02 |
| SPAG6         | -0.37 | 5.33E-02 | -0.34 | 8.13E-02 |
| UNC80         | -0.41 | 3.18E-02 | -0.34 | 8.13E-02 |
| AP001065.15   | -0.18 | 3.56E-01 | 0.34  | 8.16E-02 |
| GACAT2        | -0.06 | 7.70E-01 | 0.34  | 8.16E-02 |
| PCDHGB9P      | -0.04 | 8.33E-01 | 0.34  | 8.16E-02 |
| PPM1F         | 0.31  | 1.08E-01 | 0.34  | 8.16E-02 |
| PRRC2A        | 0.33  | 8.56E-02 | 0.34  | 8.16E-02 |
| RP11-276H7.3  | 0.32  | 9.53E-02 | 0.34  | 8.16E-02 |
| RP11-479O9.4  | -0.12 | 5.47E-01 | 0.34  | 8.16E-02 |
| CCDC112       | -0.09 | 6.42E-01 | -0.34 | 8.16E-02 |
| FOXD3         | -0.09 | 6.61E-01 | -0.34 | 8.16E-02 |
| MUC15         | -0.03 | 8.77E-01 | -0.34 | 8.16E-02 |
| PKHD1         | -0.16 | 4.24E-01 | -0.34 | 8.16E-02 |
| RP4-800M22.4  | 0.18  | 3.72E-01 | -0.34 | 8.16E-02 |
| EIF2B5-IT1    | 0.21  | 2.90E-01 | 0.34  | 8.19E-02 |
| EPB41L1       | 0.30  | 1.22E-01 | 0.34  | 8.19E-02 |
| SAPCD2P3      | 0.41  | 2.98E-02 | 0.34  | 8.19E-02 |
| AF224669.3    | -0.18 | 3.63E-01 | -0.34 | 8.19E-02 |
| DAPP1         | 0.06  | 7.75E-01 | -0.34 | 8.19E-02 |
| LINC00456     | -0.15 | 4.58E-01 | -0.34 | 8.19E-02 |
| PPTC7         | -0.16 | 4.10E-01 | -0.34 | 8.19E-02 |
| RP11-207C16.4 | -0.08 | 6.95E-01 | -0.34 | 8.19E-02 |
| RP11-694I15.7 | -0.13 | 5.13E-01 | -0.34 | 8.19E-02 |
| G36500        | -0.23 | 2.40E-01 | -0.34 | 8.22E-02 |
| KCNK15        | -0.16 | 4.04E-01 | -0.34 | 8.22E-02 |
| LINC00571     | 0.03  | 8.79E-01 | -0.34 | 8.22E-02 |
| NUP133        | 0.07  | 7.38E-01 | -0.34 | 8.22E-02 |
| PIK3R2        | -0.43 | 2.22E-02 | -0.34 | 8.22E-02 |
| RBM44         | 0.19  | 3.44E-01 | -0.34 | 8.22E-02 |
| THAP9-AS1     | -0.13 | 5.06E-01 | -0.34 | 8.22E-02 |
| AC003986.5    | -0.38 | 4.74E-02 | 0.34  | 8.22E-02 |
| ANKRD35       | 0.04  | 8.49E-01 | 0.34  | 8.22E-02 |
| ASH1L-IT1     | 0.14  | 4.67E-01 | 0.34  | 8.22E-02 |
| CCL26         | -0.24 | 2.20E-01 | 0.34  | 8.22E-02 |
| CD4           | 0.15  | 4.50E-01 | 0.34  | 8.22E-02 |
| RN7SL735P     | -0.17 | 3.83E-01 | 0.34  | 8.22E-02 |

|                      |       |          |       |          |
|----------------------|-------|----------|-------|----------|
| <b>RP11-297A16.4</b> | 0.38  | 4.64E-02 | 0.34  | 8.22E-02 |
| <b>ZNF589</b>        | 0.17  | 3.89E-01 | 0.34  | 8.22E-02 |
| <b>CABLES1</b>       | -0.19 | 3.29E-01 | -0.34 | 8.25E-02 |
| <b>FBXO25</b>        | -0.18 | 3.68E-01 | -0.34 | 8.25E-02 |
| <b>HAND2</b>         | -0.03 | 8.85E-01 | -0.34 | 8.25E-02 |
| <b>RP11-109N23.4</b> | -0.24 | 2.16E-01 | -0.34 | 8.25E-02 |
| <b>RP11-573D15.1</b> | 0.24  | 2.13E-01 | 0.34  | 8.25E-02 |
| <b>SCAP</b>          | 0.17  | 3.85E-01 | 0.34  | 8.25E-02 |
| <b>CKS1BP3</b>       | 0.00  | 9.91E-01 | -0.34 | 8.27E-02 |
| <b>CXXC4</b>         | -0.11 | 5.69E-01 | -0.34 | 8.27E-02 |
| <b>C12orf75</b>      | 0.21  | 2.91E-01 | 0.34  | 8.27E-02 |
| <b>TIGIT</b>         | 0.14  | 4.86E-01 | 0.34  | 8.27E-02 |
| <b>APPL2</b>         | -0.05 | 8.09E-01 | 0.34  | 8.30E-02 |
| <b>HAPLN3</b>        | 0.08  | 6.90E-01 | 0.34  | 8.30E-02 |
| <b>PLP1</b>          | -0.34 | 7.27E-02 | -0.34 | 8.30E-02 |
| <b>PPARD</b>         | 0.38  | 4.33E-02 | 0.34  | 8.30E-02 |
| <b>PRORS1P</b>       | 0.07  | 7.17E-01 | 0.34  | 8.30E-02 |
| <b>RNU11</b>         | 0.03  | 8.93E-01 | 0.34  | 8.30E-02 |
| <b>RP11-242C19.2</b> | 0.12  | 5.32E-01 | -0.34 | 8.30E-02 |
| <b>RP11-44N22.3</b>  | -0.22 | 2.67E-01 | 0.34  | 8.30E-02 |
| <b>RP11-567M16.6</b> | 0.20  | 3.17E-01 | 0.34  | 8.30E-02 |
| <b>SLC25A4</b>       | 0.02  | 9.39E-01 | -0.34 | 8.30E-02 |
| <b>KCNK12</b>        | 0.04  | 8.56E-01 | -0.34 | 8.33E-02 |
| <b>LINC01550</b>     | -0.30 | 1.21E-01 | -0.34 | 8.33E-02 |
| <b>NDRG3</b>         | 0.05  | 8.01E-01 | 0.34  | 8.33E-02 |
| <b>PACRGL</b>        | -0.24 | 2.16E-01 | -0.34 | 8.33E-02 |
| <b>RNU6-249P</b>     | -0.28 | 1.53E-01 | -0.34 | 8.33E-02 |
| <b>RNU6-958P</b>     | -0.08 | 6.99E-01 | 0.34  | 8.33E-02 |
| <b>RWDD2B</b>        | 0.07  | 7.26E-01 | 0.34  | 8.33E-02 |
| <b>ZNF564</b>        | 0.35  | 6.91E-02 | -0.34 | 8.33E-02 |
| <b>AIM2</b>          | 0.10  | 6.18E-01 | 0.34  | 8.36E-02 |
| <b>AP000254.8</b>    | -0.02 | 9.33E-01 | -0.34 | 8.36E-02 |
| <b>FOXO3B</b>        | 0.29  | 1.38E-01 | 0.34  | 8.36E-02 |
| <b>IFI16</b>         | 0.27  | 1.66E-01 | 0.34  | 8.36E-02 |
| <b>SLC35B3</b>       | 0.14  | 4.86E-01 | 0.34  | 8.36E-02 |
| <b>SLC35D1</b>       | 0.40  | 3.53E-02 | 0.34  | 8.36E-02 |
| <b>ATP8A1</b>        | -0.33 | 8.16E-02 | -0.34 | 8.39E-02 |
| <b>BCHE</b>          | -0.21 | 2.89E-01 | -0.34 | 8.39E-02 |
| <b>DNAJC27</b>       | 0.18  | 3.54E-01 | -0.34 | 8.39E-02 |
| <b>FTCD</b>          | -0.19 | 3.46E-01 | 0.34  | 8.39E-02 |
| <b>IGHD</b>          | 0.18  | 3.52E-01 | -0.34 | 8.39E-02 |
| <b>MSANTD4</b>       | 0.25  | 1.92E-01 | -0.34 | 8.39E-02 |
| <b>NEK9</b>          | -0.19 | 3.45E-01 | 0.34  | 8.39E-02 |
| <b>RP11-114H24.6</b> | 0.06  | 7.53E-01 | -0.34 | 8.39E-02 |
| <b>RP11-133M8.3</b>  | -0.36 | 6.13E-02 | 0.34  | 8.39E-02 |
| <b>TST</b>           | 0.36  | 5.92E-02 | 0.34  | 8.39E-02 |
| <b>VPS41</b>         | -0.21 | 2.88E-01 | -0.34 | 8.39E-02 |



|               |       |          |       |          |
|---------------|-------|----------|-------|----------|
| CFAP45        | 0.52  | 4.45E-03 | 0.34  | 8.42E-02 |
| CITF22-49E9.3 | 0.25  | 1.98E-01 | 0.34  | 8.42E-02 |
| GRN           | 0.36  | 5.82E-02 | 0.34  | 8.42E-02 |
| NKX2-8        | 0.02  | 9.01E-01 | 0.34  | 8.42E-02 |
| DYRK2         | -0.12 | 5.32E-01 | -0.34 | 8.42E-02 |
| HERC2P10      | 0.22  | 2.51E-01 | -0.34 | 8.42E-02 |
| KIAA1671      | -0.07 | 7.42E-01 | -0.34 | 8.42E-02 |
| RP11-314B1.2  | -0.02 | 9.06E-01 | -0.34 | 8.42E-02 |
| RP11-706C16.8 | 0.03  | 8.94E-01 | -0.34 | 8.42E-02 |
| RP3-414A15.12 | -0.21 | 2.94E-01 | -0.34 | 8.42E-02 |
| AC003090.1    | -0.25 | 2.00E-01 | -0.34 | 8.45E-02 |
| BRAF          | -0.16 | 4.14E-01 | -0.34 | 8.45E-02 |
| CHIC1         | 0.06  | 7.59E-01 | -0.34 | 8.45E-02 |
| CYP27B1       | -0.08 | 7.02E-01 | 0.34  | 8.45E-02 |
| DHRS2         | -0.11 | 5.90E-01 | -0.34 | 8.45E-02 |
| HOXC13        | 0.39  | 3.85E-02 | 0.34  | 8.45E-02 |
| RABGAP1       | 0.06  | 7.45E-01 | 0.34  | 8.45E-02 |
| RP1-261D10.2  | -0.17 | 3.76E-01 | -0.34 | 8.45E-02 |
| RP11-325F22.2 | -0.15 | 4.49E-01 | -0.34 | 8.45E-02 |
| RP11-585P4.5  | 0.18  | 3.49E-01 | -0.34 | 8.45E-02 |
| TBXAS1        | 0.11  | 5.65E-01 | 0.34  | 8.45E-02 |
| TNPO2         | 0.02  | 9.06E-01 | 0.34  | 8.45E-02 |
| WDFY4         | 0.00  | 9.88E-01 | 0.34  | 8.45E-02 |
| XLOC_013542   | 0.05  | 8.14E-01 | 0.34  | 8.45E-02 |
| AP1S2         | -0.28 | 1.46E-01 | -0.34 | 8.48E-02 |
| CNTN2         | -0.12 | 5.50E-01 | -0.34 | 8.48E-02 |
| RP11-557N21.1 | -0.13 | 5.20E-01 | -0.34 | 8.48E-02 |
| RP11-90D4.3   | -0.23 | 2.38E-01 | -0.34 | 8.48E-02 |
| SASS6         | 0.11  | 5.71E-01 | -0.34 | 8.48E-02 |
| ZNF296        | -0.39 | 4.18E-02 | -0.34 | 8.48E-02 |
| ADCY7         | -0.10 | 6.23E-01 | 0.34  | 8.48E-02 |
| ENSAP2        | 0.24  | 2.17E-01 | 0.34  | 8.48E-02 |
| FUT7          | 0.40  | 3.27E-02 | 0.34  | 8.48E-02 |
| KIF18BP1      | 0.33  | 8.21E-02 | 0.34  | 8.48E-02 |
| MON1B         | 0.09  | 6.40E-01 | 0.34  | 8.48E-02 |
| PTPRN2        | 0.06  | 7.45E-01 | 0.34  | 8.48E-02 |
| ADAP1         | -0.09 | 6.40E-01 | 0.34  | 8.51E-02 |
| RNU4ATAC11P   | 0.00  | 1.00E+00 | 0.34  | 8.51E-02 |
| C10orf90      | -0.12 | 5.57E-01 | -0.34 | 8.51E-02 |
| E2F8          | -0.05 | 8.04E-01 | -0.34 | 8.51E-02 |
| FRMD3         | -0.23 | 2.48E-01 | -0.34 | 8.51E-02 |
| PLEKHG1       | -0.40 | 3.75E-02 | -0.34 | 8.51E-02 |
| RP11-91P24.7  | -0.22 | 2.71E-01 | -0.34 | 8.51E-02 |
| TNNT1         | -0.28 | 1.43E-01 | -0.34 | 8.51E-02 |
| C1orf52       | -0.12 | 5.37E-01 | -0.34 | 8.54E-02 |
| MIR550A3      | -0.03 | 8.64E-01 | -0.34 | 8.54E-02 |
| RP11-651P23.5 | -0.04 | 8.46E-01 | -0.34 | 8.54E-02 |

|               |       |          |       |          |
|---------------|-------|----------|-------|----------|
| UBR5-AS1      | 0.31  | 1.12E-01 | -0.34 | 8.54E-02 |
| ZNF887P       | -0.21 | 2.93E-01 | -0.34 | 8.54E-02 |
| CD33          | 0.25  | 1.97E-01 | 0.34  | 8.54E-02 |
| IGFL1         | 0.15  | 4.45E-01 | 0.34  | 8.54E-02 |
| RP4-591C20.9  | 0.14  | 4.86E-01 | 0.34  | 8.54E-02 |
| RPL23AP10     | -0.14 | 4.66E-01 | 0.34  | 8.54E-02 |
| SNORA38       | -0.12 | 5.55E-01 | 0.34  | 8.54E-02 |
| AC011239.1    | -0.15 | 4.57E-01 | 0.34  | 8.57E-02 |
| AC090617.1    | -0.31 | 1.06E-01 | -0.34 | 8.57E-02 |
| CMKLR1        | 0.01  | 9.46E-01 | 0.34  | 8.57E-02 |
| CTA-384D8.35  | 0.27  | 1.67E-01 | 0.34  | 8.57E-02 |
| EGFEM1P       | -0.41 | 2.89E-02 | -0.34 | 8.57E-02 |
| FA2H          | -0.15 | 4.39E-01 | -0.34 | 8.57E-02 |
| HERC6         | 0.37  | 5.37E-02 | 0.34  | 8.57E-02 |
| MBNL2         | -0.11 | 5.69E-01 | -0.34 | 8.57E-02 |
| RNU6-322P     | 0.14  | 4.78E-01 | 0.34  | 8.57E-02 |
| KBTBD6        | 0.09  | 6.41E-01 | -0.34 | 8.60E-02 |
| CHL1          | 0.18  | 3.48E-01 | 0.34  | 8.60E-02 |
| CNOT6LP1      | 0.16  | 4.19E-01 | 0.34  | 8.60E-02 |
| CTD-2015H6.3  | 0.05  | 7.96E-01 | 0.34  | 8.60E-02 |
| GYLTL1B       | 0.13  | 5.06E-01 | 0.34  | 8.60E-02 |
| CPEB1         | -0.07 | 7.27E-01 | -0.34 | 8.63E-02 |
| ELAVL2        | -0.22 | 2.50E-01 | 0.34  | 8.63E-02 |
| RNFT1P2       | -0.31 | 1.09E-01 | -0.34 | 8.63E-02 |
| RP11-108M9.3  | 0.02  | 9.26E-01 | -0.34 | 8.63E-02 |
| TGFBR2        | -0.30 | 1.25E-01 | -0.34 | 8.63E-02 |
| TRPM2-AS      | 0.32  | 9.93E-02 | 0.34  | 8.63E-02 |
| VENTX         | -0.10 | 6.12E-01 | 0.34  | 8.63E-02 |
| C9orf152      | -0.30 | 1.23E-01 | -0.34 | 8.66E-02 |
| DBNL          | 0.46  | 1.27E-02 | 0.34  | 8.66E-02 |
| EPS8          | -0.24 | 2.28E-01 | -0.34 | 8.66E-02 |
| FTLP14        | 0.08  | 7.03E-01 | 0.34  | 8.66E-02 |
| MAN1C1        | -0.04 | 8.59E-01 | 0.34  | 8.66E-02 |
| PLXNA1        | 0.33  | 8.78E-02 | 0.34  | 8.66E-02 |
| RP1-28H20.3   | 0.03  | 8.67E-01 | -0.34 | 8.66E-02 |
| RP11-336A10.2 | -0.17 | 3.98E-01 | -0.34 | 8.66E-02 |
| RP11-797A18.6 | -0.09 | 6.61E-01 | -0.34 | 8.66E-02 |
| SORCS1        | -0.16 | 4.02E-01 | -0.34 | 8.66E-02 |
| CAMK2A        | -0.34 | 7.79E-02 | -0.34 | 8.69E-02 |
| CTD-2621I17.3 | 0.32  | 9.30E-02 | -0.34 | 8.69E-02 |
| KCNA5         | 0.09  | 6.60E-01 | -0.34 | 8.69E-02 |
| PDGFD         | -0.10 | 6.31E-01 | -0.34 | 8.69E-02 |
| RP1-102H19.7  | 0.05  | 7.99E-01 | -0.34 | 8.69E-02 |
| SPATC1L       | 0.01  | 9.67E-01 | 0.34  | 8.69E-02 |
| TTC32         | -0.33 | 8.32E-02 | -0.34 | 8.69E-02 |
| ZNF823        | -0.12 | 5.35E-01 | -0.34 | 8.69E-02 |
| C4BPB         | -0.16 | 4.22E-01 | 0.34  | 8.72E-02 |

|                |       |          |       |          |
|----------------|-------|----------|-------|----------|
| CA11           | 0.18  | 3.66E-01 | 0.34  | 8.72E-02 |
| FAM153A        | -0.15 | 4.58E-01 | -0.34 | 8.72E-02 |
| G11966         | 0.24  | 2.28E-01 | 0.34  | 8.72E-02 |
| GNPDA2         | 0.04  | 8.38E-01 | -0.34 | 8.72E-02 |
| MIR4296        | 0.11  | 5.94E-01 | 0.34  | 8.72E-02 |
| MTERF4         | 0.12  | 5.36E-01 | 0.34  | 8.72E-02 |
| PIWIL4         | -0.31 | 1.06E-01 | -0.34 | 8.72E-02 |
| TIGD7          | 0.19  | 3.41E-01 | -0.34 | 8.72E-02 |
| XLOC_007690    | -0.14 | 4.80E-01 | -0.34 | 8.72E-02 |
| XLOC_014082    | 0.11  | 5.75E-01 | 0.34  | 8.72E-02 |
| C2orf40        | 0.13  | 5.08E-01 | -0.34 | 8.76E-02 |
| CMB9-55A18.1   | -0.11 | 5.60E-01 | -0.34 | 8.76E-02 |
| CPEB3_ribozyme | -0.09 | 6.53E-01 | -0.34 | 8.76E-02 |
| CTA-747E2.10   | -0.43 | 2.22E-02 | -0.34 | 8.76E-02 |
| RP11-365F18.6  | 0.14  | 4.87E-01 | -0.34 | 8.76E-02 |
| RP11-478C6.4   | -0.09 | 6.56E-01 | -0.34 | 8.76E-02 |
| RP11-535M15.2  | 0.03  | 8.85E-01 | -0.34 | 8.76E-02 |
| SOCS6          | 0.09  | 6.55E-01 | -0.34 | 8.76E-02 |
| TNNI2          | -0.30 | 1.21E-01 | -0.34 | 8.76E-02 |
| DOT1L          | 0.18  | 3.56E-01 | 0.34  | 8.76E-02 |
| GPR108         | 0.31  | 1.03E-01 | 0.34  | 8.76E-02 |
| LHPP           | 0.25  | 2.03E-01 | 0.34  | 8.76E-02 |
| AF127577.8     | -0.15 | 4.34E-01 | 0.33  | 8.79E-02 |
| DMBT1P1        | -0.27 | 1.59E-01 | -0.33 | 8.79E-02 |
| ERN1           | 0.18  | 3.58E-01 | 0.33  | 8.79E-02 |
| G11316         | 0.18  | 3.60E-01 | -0.33 | 8.79E-02 |
| KLF12          | 0.19  | 3.43E-01 | -0.33 | 8.79E-02 |
| RP11-439H13.2  | -0.01 | 9.67E-01 | -0.33 | 8.79E-02 |
| RP11-864I4.1   | 0.07  | 7.36E-01 | 0.33  | 8.79E-02 |
| RP5-884M6.1    | -0.04 | 8.46E-01 | 0.33  | 8.79E-02 |
| SOX21          | -0.07 | 7.22E-01 | 0.33  | 8.79E-02 |
| WIPI2          | 0.17  | 3.92E-01 | 0.33  | 8.79E-02 |
| ZBTB16         | -0.22 | 2.54E-01 | -0.33 | 8.79E-02 |
| EXOC6B         | -0.28 | 1.53E-01 | -0.33 | 8.82E-02 |
| RP11-267J23.1  | 0.17  | 3.89E-01 | -0.33 | 8.82E-02 |
| TACC1          | -0.32 | 1.02E-01 | -0.33 | 8.82E-02 |
| TMEM62         | 0.08  | 6.73E-01 | -0.33 | 8.82E-02 |
| NXF1           | -0.01 | 9.60E-01 | 0.33  | 8.82E-02 |
| RP5-1042K10.13 | 0.06  | 7.67E-01 | 0.33  | 8.82E-02 |
| AC092066.1     | 0.04  | 8.42E-01 | -0.33 | 8.85E-02 |
| CNTNAP3B       | -0.24 | 2.25E-01 | -0.33 | 8.85E-02 |
| DGAT1          | 0.30  | 1.16E-01 | 0.33  | 8.85E-02 |
| EPB41L4A-AS2   | 0.43  | 2.35E-02 | 0.33  | 8.85E-02 |
| HCAR2          | -0.07 | 7.36E-01 | 0.33  | 8.85E-02 |
| PER1           | -0.12 | 5.41E-01 | -0.33 | 8.85E-02 |
| SH3TC1         | 0.08  | 6.98E-01 | 0.33  | 8.85E-02 |
| ZNF461         | -0.21 | 2.91E-01 | -0.33 | 8.85E-02 |

|               |       |          |       |          |
|---------------|-------|----------|-------|----------|
| ZNF626        | 0.05  | 8.03E-01 | -0.33 | 8.85E-02 |
| EEA1          | 0.15  | 4.46E-01 | -0.33 | 8.88E-02 |
| GRM7          | -0.28 | 1.51E-01 | -0.33 | 8.88E-02 |
| HCFC1R1       | 0.00  | 9.83E-01 | 0.33  | 8.88E-02 |
| KIAA1143      | 0.05  | 8.14E-01 | -0.33 | 8.88E-02 |
| MAB21L1       | 0.13  | 4.95E-01 | -0.33 | 8.88E-02 |
| SNORD123      | 0.33  | 8.48E-02 | 0.33  | 8.88E-02 |
| TBKBP1        | 0.09  | 6.64E-01 | 0.33  | 8.88E-02 |
| TMEM86A       | 0.33  | 8.62E-02 | 0.33  | 8.88E-02 |
| TNP1          | -0.03 | 8.99E-01 | -0.33 | 8.88E-02 |
| XLOC_011533   | -0.05 | 7.99E-01 | -0.33 | 8.88E-02 |
| CTD-2547L24.3 | 0.17  | 3.89E-01 | 0.33  | 8.91E-02 |
| RP4-758J18.2  | 0.08  | 6.69E-01 | 0.33  | 8.91E-02 |
| AC004381.6    | 0.13  | 5.23E-01 | -0.33 | 8.91E-02 |
| AC008074.5    | -0.31 | 1.08E-01 | -0.33 | 8.91E-02 |
| KIAA0408      | -0.23 | 2.37E-01 | -0.33 | 8.91E-02 |
| NCLP1         | -0.03 | 8.77E-01 | -0.33 | 8.91E-02 |
| RP11-126K1.2  | 0.18  | 3.68E-01 | -0.33 | 8.91E-02 |
| RP11-800A3.7  | -0.16 | 4.05E-01 | -0.33 | 8.91E-02 |
| SCN4A         | -0.02 | 9.14E-01 | -0.33 | 8.91E-02 |
| TGFB2         | 0.21  | 2.87E-01 | -0.33 | 8.91E-02 |
| C17orf104     | -0.15 | 4.53E-01 | -0.33 | 8.94E-02 |
| CTC-558O2.1   | 0.15  | 4.38E-01 | -0.33 | 8.94E-02 |
| MIR331        | -0.02 | 9.10E-01 | -0.33 | 8.94E-02 |
| OPCML         | -0.33 | 8.32E-02 | -0.33 | 8.94E-02 |
| PM20D2        | -0.01 | 9.53E-01 | -0.33 | 8.94E-02 |
| RP1-228H13.5  | 0.22  | 2.59E-01 | 0.33  | 8.94E-02 |
| SLC36A4       | 0.08  | 6.90E-01 | -0.33 | 8.94E-02 |
| TUBBP5        | 0.11  | 5.92E-01 | 0.33  | 8.94E-02 |
| URB1-AS1      | -0.12 | 5.52E-01 | 0.33  | 8.94E-02 |
| AC019048.1    | 0.00  | 9.85E-01 | -0.33 | 8.97E-02 |
| IGFALS        | 0.12  | 5.41E-01 | -0.33 | 8.97E-02 |
| RP1-234P15.4  | 0.09  | 6.36E-01 | -0.33 | 8.97E-02 |
| RP11-435J9.2  | 0.10  | 6.25E-01 | -0.33 | 8.97E-02 |
| CCDC106       | 0.10  | 6.03E-01 | 0.33  | 8.97E-02 |
| DOK1          | 0.28  | 1.52E-01 | 0.33  | 8.97E-02 |
| G2584         | 0.21  | 2.89E-01 | 0.33  | 8.97E-02 |
| LA16c-390H2.4 | -0.01 | 9.69E-01 | 0.33  | 8.97E-02 |
| RP11-435F17.3 | -0.08 | 6.81E-01 | 0.33  | 8.97E-02 |
| RP11-805J14.3 | -0.23 | 2.38E-01 | 0.33  | 8.97E-02 |
| TRAV17        | -0.20 | 3.05E-01 | 0.33  | 8.97E-02 |
| ADGRF2        | -0.10 | 6.17E-01 | -0.33 | 9.00E-02 |
| CECR6         | 0.00  | 9.80E-01 | -0.33 | 9.00E-02 |
| CYB561A3      | -0.19 | 3.36E-01 | -0.33 | 9.00E-02 |
| RNU6-742P     | 0.04  | 8.44E-01 | -0.33 | 9.00E-02 |
| RP11-158L12.4 | 0.00  | 9.94E-01 | -0.33 | 9.00E-02 |
| RP4-669K10.8  | 0.18  | 3.57E-01 | -0.33 | 9.00E-02 |

|               |       |          |       |          |
|---------------|-------|----------|-------|----------|
| ZNF175        | 0.15  | 4.42E-01 | -0.33 | 9.00E-02 |
| ZNF91         | -0.05 | 7.87E-01 | -0.33 | 9.00E-02 |
| AC093609.1    | -0.13 | 5.19E-01 | 0.33  | 9.00E-02 |
| CD40          | 0.05  | 8.17E-01 | 0.33  | 9.00E-02 |
| ENKD1         | -0.09 | 6.58E-01 | 0.33  | 9.00E-02 |
| GSTA4         | 0.23  | 2.37E-01 | 0.33  | 9.00E-02 |
| EPSTI1        | 0.27  | 1.62E-01 | 0.33  | 9.03E-02 |
| GTF2IRD2B     | 0.10  | 6.01E-01 | -0.33 | 9.03E-02 |
| RAB11B-AS1    | 0.12  | 5.51E-01 | 0.33  | 9.03E-02 |
| RND1          | 0.39  | 4.14E-02 | 0.33  | 9.03E-02 |
| RP11-379B8.1  | -0.02 | 9.23E-01 | -0.33 | 9.03E-02 |
| TASP1         | -0.17 | 3.89E-01 | -0.33 | 9.03E-02 |
| ATOH8         | -0.14 | 4.83E-01 | -0.33 | 9.07E-02 |
| CLCC1         | -0.07 | 7.17E-01 | -0.33 | 9.07E-02 |
| FST           | -0.23 | 2.32E-01 | -0.33 | 9.07E-02 |
| GSPT2         | 0.01  | 9.46E-01 | -0.33 | 9.07E-02 |
| RP11-503P10.1 | 0.02  | 9.11E-01 | -0.33 | 9.07E-02 |
| RP11-799B12.4 | -0.26 | 1.76E-01 | -0.33 | 9.07E-02 |
| ZNF383        | -0.21 | 2.91E-01 | -0.33 | 9.07E-02 |
| GIMAP1        | -0.12 | 5.29E-01 | 0.33  | 9.07E-02 |
| HEYL          | -0.25 | 2.01E-01 | 0.33  | 9.07E-02 |
| MED18         | 0.23  | 2.43E-01 | 0.33  | 9.07E-02 |
| PSPH          | 0.37  | 5.29E-02 | 0.33  | 9.07E-02 |
| RP11-563N6.6  | 0.04  | 8.38E-01 | 0.33  | 9.07E-02 |
| SLC1A5        | 0.27  | 1.72E-01 | 0.33  | 9.07E-02 |
| CTD-2526A2.2  | -0.19 | 3.26E-01 | -0.33 | 9.10E-02 |
| G35821        | -0.18 | 3.52E-01 | -0.33 | 9.10E-02 |
| G40767        | 0.16  | 4.08E-01 | -0.33 | 9.10E-02 |
| HS3ST5        | -0.22 | 2.64E-01 | -0.33 | 9.10E-02 |
| MIR181A2HG    | -0.23 | 2.31E-01 | -0.33 | 9.10E-02 |
| PRKCZ         | 0.09  | 6.61E-01 | 0.33  | 9.10E-02 |
| RNU6-767P     | 0.12  | 5.29E-01 | -0.33 | 9.10E-02 |
| RP5-1142J19.1 | 0.28  | 1.46E-01 | 0.33  | 9.10E-02 |
| SMIM17        | 0.21  | 2.83E-01 | -0.33 | 9.10E-02 |
| TBATA         | -0.10 | 6.01E-01 | -0.33 | 9.10E-02 |
| TMEM108-AS1   | -0.22 | 2.65E-01 | 0.33  | 9.10E-02 |
| XYLB          | 0.02  | 9.06E-01 | -0.33 | 9.10E-02 |
| RHBDD3        | 0.39  | 4.20E-02 | 0.33  | 9.13E-02 |
| XLOC_002876   | -0.33 | 8.42E-02 | 0.33  | 9.13E-02 |
| XLOC_008719   | -0.27 | 1.67E-01 | 0.33  | 9.13E-02 |
| PRLR          | 0.12  | 5.55E-01 | -0.33 | 9.13E-02 |
| RP11-494K3.2  | -0.03 | 8.67E-01 | -0.33 | 9.13E-02 |
| TSIX          | -0.39 | 4.29E-02 | -0.33 | 9.13E-02 |
| WI2-1896O14.1 | -0.29 | 1.33E-01 | -0.33 | 9.13E-02 |
| C8orf48       | -0.36 | 6.05E-02 | -0.33 | 9.16E-02 |
| EPHX2         | -0.18 | 3.58E-01 | -0.33 | 9.16E-02 |
| HMG20A        | 0.24  | 2.19E-01 | 0.33  | 9.16E-02 |

|               |       |          |       |          |
|---------------|-------|----------|-------|----------|
| MIER2         | -0.12 | 5.47E-01 | 0.33  | 9.16E-02 |
| NEURL3        | 0.29  | 1.28E-01 | 0.33  | 9.16E-02 |
| RP11-329N15.3 | 0.33  | 9.12E-02 | -0.33 | 9.16E-02 |
| RP11-616K22.1 | -0.21 | 2.72E-01 | 0.33  | 9.16E-02 |
| RP11-875O11.3 | -0.17 | 3.77E-01 | 0.33  | 9.16E-02 |
| SPR           | 0.07  | 7.40E-01 | 0.33  | 9.16E-02 |
| TCF25         | 0.12  | 5.44E-01 | 0.33  | 9.16E-02 |
| TMPRSS13      | 0.06  | 7.48E-01 | 0.33  | 9.16E-02 |
| ZNF184        | 0.03  | 8.73E-01 | -0.33 | 9.16E-02 |
| ZNF92P3       | -0.30 | 1.15E-01 | -0.33 | 9.16E-02 |
| CASC18        | 0.02  | 9.16E-01 | 0.33  | 9.19E-02 |
| CTD-2104P17.2 | -0.32 | 9.56E-02 | -0.33 | 9.19E-02 |
| CTD-2179L22.1 | -0.13 | 5.25E-01 | 0.33  | 9.19E-02 |
| DNAJC19P5     | -0.07 | 7.30E-01 | -0.33 | 9.19E-02 |
| GNMT          | -0.19 | 3.21E-01 | -0.33 | 9.19E-02 |
| KB-1615E4.2   | -0.15 | 4.41E-01 | 0.33  | 9.19E-02 |
| MFSD6         | -0.16 | 4.05E-01 | -0.33 | 9.19E-02 |
| MVP           | 0.15  | 4.34E-01 | 0.33  | 9.19E-02 |
| NCBP3         | -0.10 | 6.00E-01 | -0.33 | 9.19E-02 |
| RASAL1        | 0.21  | 2.93E-01 | 0.33  | 9.19E-02 |
| RP11-188P20.3 | -0.10 | 6.23E-01 | -0.33 | 9.19E-02 |
| USP31         | 0.04  | 8.37E-01 | -0.33 | 9.19E-02 |
| ADIRF-AS1     | -0.18 | 3.70E-01 | -0.33 | 9.22E-02 |
| DUOX2         | 0.27  | 1.60E-01 | 0.33  | 9.22E-02 |
| FAR2          | -0.28 | 1.46E-01 | -0.33 | 9.22E-02 |
| FNTB          | 0.06  | 7.79E-01 | 0.33  | 9.22E-02 |
| FSD1          | 0.19  | 3.27E-01 | 0.33  | 9.22E-02 |
| HIGD1AP18     | -0.08 | 6.94E-01 | -0.33 | 9.22E-02 |
| IL10          | 0.04  | 8.40E-01 | 0.33  | 9.22E-02 |
| KCNJ2-AS1     | 0.17  | 3.80E-01 | 0.33  | 9.22E-02 |
| MYO1F         | 0.21  | 2.88E-01 | 0.33  | 9.22E-02 |
| NCDN          | 0.21  | 2.92E-01 | 0.33  | 9.22E-02 |
| PLK1          | 0.22  | 2.55E-01 | 0.33  | 9.22E-02 |
| RP11-409K20.7 | 0.00  | 9.93E-01 | 0.33  | 9.22E-02 |
| ST3GAL2       | 0.05  | 7.85E-01 | 0.33  | 9.22E-02 |
| AP001258.4    | 0.22  | 2.56E-01 | -0.33 | 9.26E-02 |
| BPHL          | -0.16 | 4.25E-01 | -0.33 | 9.26E-02 |
| RNASE13       | -0.11 | 5.86E-01 | -0.33 | 9.26E-02 |
| RP11-141C7.5  | -0.55 | 2.53E-03 | -0.33 | 9.26E-02 |
| RP11-147L13.8 | -0.15 | 4.46E-01 | -0.33 | 9.26E-02 |
| AZGP1P1       | 0.08  | 7.03E-01 | 0.33  | 9.26E-02 |
| HMHA1         | 0.23  | 2.33E-01 | 0.33  | 9.26E-02 |
| HSPD1P2       | 0.22  | 2.71E-01 | 0.33  | 9.26E-02 |
| RP11-159F24.6 | 0.10  | 6.27E-01 | 0.33  | 9.26E-02 |
| RP11-398B16.2 | 0.21  | 2.84E-01 | 0.33  | 9.26E-02 |
| RP11-505K9.1  | 0.04  | 8.32E-01 | 0.33  | 9.26E-02 |
| TEKT4P2       | 0.08  | 6.68E-01 | 0.33  | 9.26E-02 |

|                |       |          |       |          |
|----------------|-------|----------|-------|----------|
| TOX2           | -0.28 | 1.48E-01 | 0.33  | 9.26E-02 |
| ADAMTS4        | 0.28  | 1.50E-01 | 0.33  | 9.29E-02 |
| LINC01159      | 0.29  | 1.32E-01 | 0.33  | 9.29E-02 |
| PAFAH1B3       | 0.12  | 5.56E-01 | 0.33  | 9.29E-02 |
| PHF6           | 0.09  | 6.60E-01 | 0.33  | 9.29E-02 |
| SNORD85        | -0.02 | 9.23E-01 | 0.33  | 9.29E-02 |
| SPNS2          | 0.29  | 1.34E-01 | 0.33  | 9.29E-02 |
| UPF2           | 0.04  | 8.58E-01 | 0.33  | 9.29E-02 |
| CTC-422A18.2   | 0.35  | 6.44E-02 | -0.33 | 9.29E-02 |
| RP11-367N14.2  | -0.12 | 5.44E-01 | -0.33 | 9.29E-02 |
| SYBU           | -0.30 | 1.20E-01 | -0.33 | 9.29E-02 |
| XLOC_012849    | -0.14 | 4.73E-01 | -0.33 | 9.29E-02 |
| AZGP1          | -0.01 | 9.63E-01 | 0.33  | 9.32E-02 |
| MKNK1          | 0.24  | 2.26E-01 | 0.33  | 9.32E-02 |
| MYO10          | -0.20 | 3.03E-01 | 0.33  | 9.32E-02 |
| NAAA           | 0.31  | 1.09E-01 | 0.33  | 9.32E-02 |
| SLC15A3        | 0.00  | 9.83E-01 | 0.33  | 9.32E-02 |
| EXOC1          | -0.18 | 3.68E-01 | -0.33 | 9.32E-02 |
| ISM2           | -0.04 | 8.50E-01 | -0.33 | 9.32E-02 |
| POLA1          | -0.12 | 5.29E-01 | -0.33 | 9.32E-02 |
| ZNF706         | -0.12 | 5.29E-01 | -0.33 | 9.32E-02 |
| AB019441.29    | 0.31  | 1.12E-01 | -0.33 | 9.35E-02 |
| AC009274.6     | -0.21 | 2.73E-01 | -0.33 | 9.35E-02 |
| CTD-2303H24.2  | 0.26  | 1.89E-01 | 0.33  | 9.35E-02 |
| EDIL3          | -0.09 | 6.61E-01 | -0.33 | 9.35E-02 |
| ELP6           | 0.32  | 9.39E-02 | 0.33  | 9.35E-02 |
| RNF185         | -0.03 | 8.90E-01 | 0.33  | 9.35E-02 |
| RNU6-1143P     | 0.00  | 9.81E-01 | 0.33  | 9.35E-02 |
| RNU6-846P      | 0.08  | 6.97E-01 | -0.33 | 9.35E-02 |
| RP11-357H14.16 | -0.10 | 6.01E-01 | 0.33  | 9.35E-02 |
| RP11-461L13.4  | -0.09 | 6.37E-01 | -0.33 | 9.35E-02 |
| RP11-665E10.4  | 0.16  | 4.14E-01 | -0.33 | 9.35E-02 |
| RP11-7F17.3    | -0.42 | 2.43E-02 | -0.33 | 9.35E-02 |
| SV2B           | -0.38 | 4.37E-02 | -0.33 | 9.35E-02 |
| GGT1           | 0.04  | 8.37E-01 | 0.33  | 9.39E-02 |
| HRNR           | 0.24  | 2.23E-01 | 0.33  | 9.39E-02 |
| NANOGP5        | 0.01  | 9.79E-01 | 0.33  | 9.39E-02 |
| PRPF40B        | 0.03  | 8.68E-01 | 0.33  | 9.39E-02 |
| RIPK3          | -0.15 | 4.44E-01 | 0.33  | 9.39E-02 |
| SLC22A3        | 0.22  | 2.70E-01 | 0.33  | 9.39E-02 |
| NXNL2          | -0.22 | 2.58E-01 | -0.33 | 9.39E-02 |
| AC007255.8     | -0.07 | 7.25E-01 | 0.33  | 9.42E-02 |
| ARIH2OS        | 0.16  | 4.24E-01 | 0.33  | 9.42E-02 |
| INA            | 0.18  | 3.57E-01 | 0.33  | 9.42E-02 |
| ITGAX          | 0.00  | 9.85E-01 | 0.33  | 9.42E-02 |
| MED29          | 0.36  | 5.64E-02 | 0.33  | 9.42E-02 |
| TREML1         | -0.04 | 8.52E-01 | 0.33  | 9.42E-02 |

|                      |       |          |       |          |
|----------------------|-------|----------|-------|----------|
| <b>C11orf42</b>      | -0.27 | 1.60E-01 | -0.33 | 9.42E-02 |
| <b>DCBLD2</b>        | -0.05 | 8.19E-01 | -0.33 | 9.42E-02 |
| <b>MAP3K7</b>        | 0.13  | 4.98E-01 | -0.33 | 9.42E-02 |
| <b>RP11-646I6.5</b>  | -0.24 | 2.11E-01 | -0.33 | 9.42E-02 |
| <b>RPL5P30</b>       | -0.09 | 6.34E-01 | -0.33 | 9.42E-02 |
| <b>AC005740.6</b>    | -0.05 | 7.84E-01 | -0.33 | 9.45E-02 |
| <b>BRD1</b>          | -0.29 | 1.36E-01 | -0.33 | 9.45E-02 |
| <b>CD38</b>          | 0.26  | 1.77E-01 | 0.33  | 9.45E-02 |
| <b>CEP164P1</b>      | 0.08  | 6.69E-01 | -0.33 | 9.45E-02 |
| <b>RNASE7</b>        | 0.18  | 3.55E-01 | 0.33  | 9.45E-02 |
| <b>RP11-196O2.1</b>  | -0.29 | 1.32E-01 | -0.33 | 9.45E-02 |
| <b>RP11-436M15.3</b> | 0.17  | 3.78E-01 | -0.33 | 9.45E-02 |
| <b>RP11-463C14.1</b> | -0.08 | 6.93E-01 | -0.33 | 9.45E-02 |
| <b>SLC29A1</b>       | -0.03 | 8.74E-01 | -0.33 | 9.45E-02 |
| <b>ADAT3</b>         | -0.21 | 2.95E-01 | 0.33  | 9.48E-02 |
| <b>ADD3-AS1</b>      | -0.06 | 7.43E-01 | -0.33 | 9.48E-02 |
| <b>ANXA3</b>         | 0.09  | 6.55E-01 | -0.33 | 9.48E-02 |
| <b>BAAT</b>          | 0.05  | 7.95E-01 | -0.33 | 9.48E-02 |
| <b>C9orf172</b>      | 0.07  | 7.28E-01 | 0.33  | 9.48E-02 |
| <b>CCP110</b>        | -0.35 | 6.48E-02 | -0.33 | 9.48E-02 |
| <b>CYB5D2</b>        | 0.05  | 7.92E-01 | 0.33  | 9.48E-02 |
| <b>RP11-154F14.2</b> | -0.56 | 1.98E-03 | -0.33 | 9.48E-02 |
| <b>RP11-384B12.2</b> | 0.10  | 6.05E-01 | -0.33 | 9.48E-02 |
| <b>RP11-556I13.2</b> | 0.33  | 9.09E-02 | 0.33  | 9.48E-02 |
| <b>STK24-AS1</b>     | 0.04  | 8.46E-01 | 0.33  | 9.48E-02 |
| <b>U3</b>            | -0.39 | 4.21E-02 | 0.33  | 9.48E-02 |
| <b>ART3</b>          | 0.01  | 9.49E-01 | -0.33 | 9.52E-02 |
| <b>CTC-327F10.1</b>  | -0.09 | 6.44E-01 | -0.33 | 9.52E-02 |
| <b>FUT10</b>         | -0.12 | 5.44E-01 | -0.33 | 9.52E-02 |
| <b>GPC5</b>          | 0.09  | 6.59E-01 | -0.33 | 9.52E-02 |
| <b>RP13-476E20.1</b> | -0.44 | 1.81E-02 | -0.33 | 9.52E-02 |
| <b>CDC25B</b>        | 0.23  | 2.41E-01 | 0.33  | 9.52E-02 |
| <b>G39827</b>        | 0.21  | 2.93E-01 | 0.33  | 9.52E-02 |
| <b>TBC1D22A</b>      | 0.21  | 2.89E-01 | 0.33  | 9.52E-02 |
| <b>AP000679.2</b>    | -0.14 | 4.90E-01 | -0.33 | 9.55E-02 |
| <b>ARHGEF2</b>       | 0.18  | 3.64E-01 | 0.33  | 9.55E-02 |
| <b>CTC-444N24.8</b>  | -0.01 | 9.55E-01 | -0.33 | 9.55E-02 |
| <b>EAF1-AS1</b>      | 0.06  | 7.66E-01 | -0.33 | 9.55E-02 |
| <b>HNRNPU-AS1</b>    | -0.05 | 8.04E-01 | -0.33 | 9.55E-02 |
| <b>LINC00294</b>     | 0.05  | 7.87E-01 | 0.33  | 9.55E-02 |
| <b>RP11-157K17.5</b> | -0.13 | 5.08E-01 | -0.33 | 9.55E-02 |
| <b>RP11-302K17.4</b> | 0.01  | 9.61E-01 | -0.33 | 9.55E-02 |
| <b>RP11-523H24.3</b> | -0.09 | 6.56E-01 | -0.33 | 9.55E-02 |
| <b>SDHDP6</b>        | 0.01  | 9.65E-01 | -0.33 | 9.55E-02 |
| <b>SNORD6</b>        | 0.13  | 5.00E-01 | -0.33 | 9.55E-02 |
| <b>THAP2</b>         | 0.26  | 1.85E-01 | 0.33  | 9.55E-02 |
| <b>TMEM178B</b>      | -0.20 | 3.05E-01 | -0.33 | 9.55E-02 |



|                |       |          |       |          |
|----------------|-------|----------|-------|----------|
| TTC5           | -0.14 | 4.86E-01 | -0.33 | 9.55E-02 |
| ZNF283         | 0.26  | 1.87E-01 | -0.33 | 9.55E-02 |
| ZNF530         | -0.15 | 4.58E-01 | -0.33 | 9.55E-02 |
| CENPH          | 0.06  | 7.59E-01 | -0.33 | 9.58E-02 |
| LRIT2          | -0.06 | 7.64E-01 | -0.33 | 9.58E-02 |
| MIR4500HG      | -0.11 | 5.84E-01 | -0.33 | 9.58E-02 |
| PPIL4          | 0.06  | 7.51E-01 | -0.33 | 9.58E-02 |
| RNU7-151P      | 0.04  | 8.21E-01 | -0.33 | 9.58E-02 |
| RP11-113K21.4  | -0.13 | 5.01E-01 | -0.33 | 9.58E-02 |
| ZNF704         | -0.24 | 2.23E-01 | -0.33 | 9.58E-02 |
| CDKL5          | -0.03 | 8.70E-01 | 0.33  | 9.58E-02 |
| FPGS           | 0.02  | 9.33E-01 | 0.33  | 9.58E-02 |
| IST1           | 0.35  | 7.03E-02 | 0.33  | 9.58E-02 |
| PODNL1         | -0.08 | 6.93E-01 | 0.33  | 9.58E-02 |
| SLC30A4        | 0.10  | 6.08E-01 | 0.33  | 9.58E-02 |
| TPD52L1        | 0.17  | 3.98E-01 | 0.33  | 9.58E-02 |
| TRAV16         | -0.15 | 4.57E-01 | 0.33  | 9.58E-02 |
| XXcos-LUCA16.1 | -0.02 | 9.20E-01 | 0.33  | 9.58E-02 |
| ANTXR1         | 0.13  | 5.16E-01 | 0.33  | 9.61E-02 |
| APOC1          | -0.02 | 9.10E-01 | -0.33 | 9.61E-02 |
| CCDC144NL-AS1  | 0.00  | 9.85E-01 | 0.33  | 9.61E-02 |
| CDH7           | 0.07  | 7.40E-01 | -0.33 | 9.61E-02 |
| CTB-131K11.1   | -0.09 | 6.38E-01 | -0.33 | 9.61E-02 |
| GFOD2          | 0.39  | 4.28E-02 | 0.33  | 9.61E-02 |
| IL32           | 0.38  | 4.46E-02 | 0.33  | 9.61E-02 |
| LRRN4CL        | -0.29 | 1.30E-01 | -0.33 | 9.61E-02 |
| RAPSN          | -0.07 | 7.36E-01 | -0.33 | 9.61E-02 |
| RP1-34H18.1    | -0.27 | 1.60E-01 | -0.33 | 9.61E-02 |
| RP11-156E8.1   | -0.04 | 8.37E-01 | -0.33 | 9.61E-02 |
| RPS15AP12      | 0.09  | 6.52E-01 | -0.33 | 9.61E-02 |
| SMCO3          | -0.24 | 2.24E-01 | -0.33 | 9.61E-02 |
| TM4SF20        | 0.08  | 6.89E-01 | -0.33 | 9.61E-02 |
| ZNF552         | 0.35  | 6.87E-02 | 0.33  | 9.61E-02 |
| AP000692.10    | 0.12  | 5.52E-01 | 0.33  | 9.65E-02 |
| GINS3          | 0.20  | 3.11E-01 | 0.33  | 9.65E-02 |
| MAN1B1-AS1     | 0.22  | 2.58E-01 | 0.33  | 9.65E-02 |
| MCAM           | 0.28  | 1.45E-01 | 0.33  | 9.65E-02 |
| MOB3A          | 0.11  | 5.88E-01 | 0.33  | 9.65E-02 |
| PXDN           | -0.09 | 6.55E-01 | 0.33  | 9.65E-02 |
| XLOC_014397    | -0.04 | 8.22E-01 | 0.33  | 9.65E-02 |
| RNU6-1284P     | -0.01 | 9.61E-01 | -0.33 | 9.65E-02 |
| RP11-359M6.1   | -0.15 | 4.38E-01 | -0.33 | 9.65E-02 |
| RP11-459O16.1  | -0.23 | 2.35E-01 | -0.33 | 9.65E-02 |
| RP11-485M7.2   | 0.02  | 9.37E-01 | -0.33 | 9.65E-02 |
| CC2D1A         | 0.18  | 3.57E-01 | 0.33  | 9.68E-02 |
| FABP7P1        | -0.51 | 5.35E-03 | 0.33  | 9.68E-02 |
| KLHDC8B        | 0.04  | 8.57E-01 | 0.33  | 9.68E-02 |

|               |       |          |       |          |
|---------------|-------|----------|-------|----------|
| FOXP2         | -0.04 | 8.39E-01 | -0.33 | 9.68E-02 |
| MAP2          | -0.30 | 1.23E-01 | -0.33 | 9.68E-02 |
| MRPS10P2      | -0.05 | 8.12E-01 | -0.33 | 9.68E-02 |
| RALGDS        | -0.31 | 1.12E-01 | -0.33 | 9.68E-02 |
| RC3H1         | 0.00  | 9.93E-01 | -0.33 | 9.68E-02 |
| SLC5A8        | 0.16  | 4.17E-01 | -0.33 | 9.68E-02 |
| AC004231.2    | -0.35 | 6.70E-02 | -0.33 | 9.71E-02 |
| AZIN1         | -0.04 | 8.44E-01 | -0.33 | 9.71E-02 |
| CR769776.1    | -0.44 | 2.07E-02 | 0.33  | 9.71E-02 |
| CTD-3234P18.6 | -0.13 | 5.18E-01 | -0.33 | 9.71E-02 |
| DPYD          | 0.28  | 1.50E-01 | 0.33  | 9.71E-02 |
| MIR5192       | -0.26 | 1.89E-01 | 0.33  | 9.71E-02 |
| MKLN1-AS      | -0.08 | 6.98E-01 | 0.33  | 9.71E-02 |
| MMP9          | 0.41  | 3.01E-02 | 0.33  | 9.71E-02 |
| OR2A01P       | -0.30 | 1.26E-01 | -0.33 | 9.71E-02 |
| PEG3          | -0.34 | 7.24E-02 | -0.33 | 9.71E-02 |
| PLEKHD1       | 0.14  | 4.87E-01 | -0.33 | 9.71E-02 |
| PPP1R9B       | -0.10 | 6.00E-01 | 0.33  | 9.71E-02 |
| RP11-452H21.4 | -0.35 | 7.10E-02 | -0.33 | 9.71E-02 |
| AC005262.4    | 0.27  | 1.67E-01 | 0.33  | 9.75E-02 |
| AC124789.1    | 0.12  | 5.56E-01 | 0.33  | 9.75E-02 |
| SFTPD         | 0.06  | 7.49E-01 | 0.33  | 9.75E-02 |
| BCKDK         | 0.29  | 1.33E-01 | 0.33  | 9.78E-02 |
| FAM86DP       | 0.14  | 4.93E-01 | -0.33 | 9.78E-02 |
| FEM1A         | 0.22  | 2.65E-01 | -0.33 | 9.78E-02 |
| PHF21A        | -0.08 | 6.75E-01 | 0.33  | 9.78E-02 |
| RP11-165E7.1  | -0.06 | 7.48E-01 | -0.33 | 9.78E-02 |
| RP11-454K7.1  | 0.15  | 4.49E-01 | -0.33 | 9.78E-02 |
| SLC19A3       | -0.15 | 4.60E-01 | -0.33 | 9.78E-02 |
| SLC35G1       | 0.34  | 7.44E-02 | -0.33 | 9.78E-02 |
| STXBP5L       | -0.03 | 8.75E-01 | -0.33 | 9.78E-02 |
| TMA16         | 0.28  | 1.45E-01 | -0.33 | 9.78E-02 |
| USP24         | -0.02 | 9.31E-01 | -0.33 | 9.78E-02 |
| WDR92         | -0.22 | 2.61E-01 | -0.33 | 9.78E-02 |
| ZNF532        | 0.08  | 6.72E-01 | 0.33  | 9.78E-02 |
| AC005086.3    | -0.07 | 7.35E-01 | 0.32  | 9.81E-02 |
| AC008063.2    | -0.17 | 3.76E-01 | 0.32  | 9.81E-02 |
| AC024257.1    | 0.07  | 7.29E-01 | -0.32 | 9.81E-02 |
| DMXL2         | -0.25 | 1.99E-01 | 0.32  | 9.81E-02 |
| HNF4A         | 0.06  | 7.80E-01 | -0.32 | 9.81E-02 |
| PEG10         | -0.29 | 1.38E-01 | -0.32 | 9.81E-02 |
| RN7SKP235     | -0.02 | 9.20E-01 | 0.32  | 9.81E-02 |
| SLC25A28      | 0.32  | 9.50E-02 | 0.32  | 9.81E-02 |
| SPON2         | -0.20 | 3.11E-01 | -0.32 | 9.81E-02 |
| ADGRB1        | -0.16 | 4.29E-01 | -0.32 | 9.85E-02 |
| ALPK2         | -0.12 | 5.43E-01 | 0.32  | 9.85E-02 |
| ASH1L         | -0.15 | 4.35E-01 | -0.32 | 9.85E-02 |

|                      |       |          |       |          |
|----------------------|-------|----------|-------|----------|
| <b>FBXW2</b>         | 0.26  | 1.81E-01 | 0.32  | 9.85E-02 |
| <b>GOPC</b>          | 0.09  | 6.42E-01 | -0.32 | 9.85E-02 |
| <b>LINC00302</b>     | 0.12  | 5.33E-01 | 0.32  | 9.85E-02 |
| <b>RP11-358B23.6</b> | -0.04 | 8.39E-01 | -0.32 | 9.85E-02 |
| <b>SAMD9</b>         | 0.36  | 5.66E-02 | 0.32  | 9.85E-02 |
| <b>ADAM19</b>        | 0.29  | 1.38E-01 | 0.32  | 9.88E-02 |
| <b>TRABD</b>         | 0.21  | 2.83E-01 | 0.32  | 9.88E-02 |
| <b>TTC23</b>         | 0.17  | 3.83E-01 | 0.32  | 9.88E-02 |
| <b>UPP1</b>          | 0.13  | 5.11E-01 | 0.32  | 9.88E-02 |
| <b>AC006145.4</b>    | -0.18 | 3.59E-01 | -0.32 | 9.88E-02 |
| <b>CLCN5</b>         | 0.14  | 4.89E-01 | -0.32 | 9.88E-02 |
| <b>FAM221A</b>       | -0.39 | 3.95E-02 | -0.32 | 9.88E-02 |
| <b>FAM84B</b>        | 0.20  | 2.98E-01 | -0.32 | 9.88E-02 |
| <b>RPL23AP58</b>     | -0.07 | 7.15E-01 | -0.32 | 9.88E-02 |
| <b>FES</b>           | 0.21  | 2.73E-01 | 0.32  | 9.91E-02 |
| <b>KBTBD2</b>        | 0.23  | 2.41E-01 | 0.32  | 9.91E-02 |
| <b>OSMR</b>          | 0.20  | 3.06E-01 | 0.32  | 9.91E-02 |
| <b>PEX26</b>         | 0.25  | 2.05E-01 | 0.32  | 9.91E-02 |
| <b>PPM1M</b>         | -0.03 | 8.74E-01 | 0.32  | 9.91E-02 |
| <b>THTPA</b>         | 0.20  | 3.13E-01 | 0.32  | 9.91E-02 |
| <b>DCC</b>           | -0.05 | 8.02E-01 | -0.32 | 9.91E-02 |
| <b>FBXW11P1</b>      | -0.21 | 2.95E-01 | -0.32 | 9.91E-02 |
| <b>RP11-496I9.1</b>  | -0.26 | 1.83E-01 | -0.32 | 9.91E-02 |
| <b>RP3-466P17.1</b>  | -0.07 | 7.15E-01 | -0.32 | 9.91E-02 |
| <b>SGOL1-AS1</b>     | 0.17  | 3.88E-01 | -0.32 | 9.91E-02 |
| <b>SPN</b>           | 0.30  | 1.15E-01 | 0.32  | 9.95E-02 |
| <b>TBC1D13</b>       | 0.15  | 4.41E-01 | 0.32  | 9.95E-02 |
| <b>ZFY-AS1</b>       | 0.30  | 1.23E-01 | 0.32  | 9.95E-02 |
| <b>G39721</b>        | -0.26 | 1.82E-01 | -0.32 | 9.95E-02 |
| <b>GPR89A</b>        | 0.06  | 7.66E-01 | -0.32 | 9.95E-02 |
| <b>PARGP1</b>        | -0.20 | 3.18E-01 | -0.32 | 9.95E-02 |
| <b>RP11-121C2.3</b>  | -0.04 | 8.39E-01 | -0.32 | 9.95E-02 |
| <b>RP11-89H19.1</b>  | -0.20 | 3.04E-01 | -0.32 | 9.95E-02 |
| <b>RP4-657D16.3</b>  | -0.25 | 1.93E-01 | -0.32 | 9.95E-02 |
| <b>KCTD12</b>        | -0.32 | 1.01E-01 | -0.32 | 9.98E-02 |
| <b>KRT4</b>          | -0.16 | 4.03E-01 | -0.32 | 9.98E-02 |
| <b>METTL25</b>       | 0.06  | 7.77E-01 | -0.32 | 9.98E-02 |
| <b>PI4K2B</b>        | 0.30  | 1.21E-01 | -0.32 | 9.98E-02 |
| <b>RNU6-1091P</b>    | 0.10  | 6.08E-01 | -0.32 | 9.98E-02 |
| <b>RNU6-433P</b>     | -0.29 | 1.30E-01 | -0.32 | 9.98E-02 |
| <b>RP11-478C6.1</b>  | -0.19 | 3.26E-01 | -0.32 | 9.98E-02 |
| <b>RP11-84C10.1</b>  | 0.15  | 4.39E-01 | -0.32 | 9.98E-02 |
| <b>RP5-966M1.7</b>   | -0.13 | 5.18E-01 | -0.32 | 9.98E-02 |
| <b>APOL3</b>         | 0.06  | 7.76E-01 | 0.32  | 9.98E-02 |
| <b>COMP</b>          | -0.04 | 8.23E-01 | 0.32  | 9.98E-02 |
| <b>PINK1</b>         | 0.01  | 9.74E-01 | 0.32  | 9.98E-02 |
| <b>RP11-372B4.3</b>  | 0.26  | 1.82E-01 | 0.32  | 9.98E-02 |

|               |       |          |       |          |
|---------------|-------|----------|-------|----------|
| SPRY2         | 0.00  | 9.96E-01 | 0.32  | 9.98E-02 |
| TCP11L1       | -0.15 | 4.57E-01 | 0.32  | 9.98E-02 |
| TMEM37        | 0.38  | 4.49E-02 | 0.32  | 9.98E-02 |
| ADAM10        | 0.20  | 2.98E-01 | 0.32  | 1.00E-01 |
| C2orf15       | 0.10  | 6.26E-01 | -0.32 | 1.00E-01 |
| NOS3          | 0.08  | 7.04E-01 | -0.32 | 1.00E-01 |
| RP11-687F6.5  | 0.40  | 3.45E-02 | -0.32 | 1.00E-01 |
| SMARCAL1      | 0.15  | 4.42E-01 | 0.32  | 1.00E-01 |
| TDRD5         | -0.32 | 9.87E-02 | -0.32 | 1.00E-01 |
| TMEM190       | -0.18 | 3.65E-01 | 0.32  | 1.00E-01 |
| AC105398.3    | -0.10 | 6.06E-01 | -0.32 | 1.00E-01 |
| NDUFA4L2      | 0.14  | 4.82E-01 | 0.32  | 1.00E-01 |
| PPP2R4        | 0.14  | 4.76E-01 | 0.32  | 1.00E-01 |
| RP11-107M16.2 | 0.05  | 7.97E-01 | -0.32 | 1.00E-01 |
| RP11-791G16.2 | -0.25 | 2.04E-01 | -0.32 | 1.00E-01 |
| RP11-855A2.5  | -0.18 | 3.60E-01 | 0.32  | 1.00E-01 |
| AJAP1         | 0.26  | 1.89E-01 | 0.32  | 1.01E-01 |
| ANKRD12       | -0.30 | 1.17E-01 | -0.32 | 1.01E-01 |
| GCSAM         | -0.23 | 2.43E-01 | -0.32 | 1.01E-01 |
| INADL         | -0.23 | 2.43E-01 | -0.32 | 1.01E-01 |
| REP15         | -0.10 | 6.19E-01 | -0.32 | 1.01E-01 |
| RP11-148L24.1 | -0.30 | 1.20E-01 | -0.32 | 1.01E-01 |
| RP11-296E7.1  | -0.15 | 4.57E-01 | -0.32 | 1.01E-01 |
| SCAANT1       | 0.11  | 5.87E-01 | -0.32 | 1.01E-01 |
| SOX21-AS1     | 0.32  | 9.71E-02 | 0.32  | 1.01E-01 |
| TMEM30C       | -0.10 | 6.13E-01 | -0.32 | 1.01E-01 |
| AC022819.2    | -0.02 | 9.32E-01 | 0.32  | 1.01E-01 |
| AL590762.10   | -0.39 | 4.21E-02 | -0.32 | 1.01E-01 |
| ARMCX3        | -0.22 | 2.65E-01 | -0.32 | 1.01E-01 |
| CTD-2553L13.4 | 0.21  | 2.81E-01 | 0.32  | 1.01E-01 |
| PIFO          | -0.26 | 1.88E-01 | -0.32 | 1.01E-01 |
| RHBDD2        | 0.28  | 1.51E-01 | 0.32  | 1.01E-01 |
| SESN3         | 0.09  | 6.42E-01 | 0.32  | 1.01E-01 |
| TRIM73        | 0.24  | 2.17E-01 | -0.32 | 1.01E-01 |
| XLOC_013914   | -0.17 | 3.94E-01 | -0.32 | 1.01E-01 |
| ATP5F1P7      | -0.33 | 8.18E-02 | -0.32 | 1.02E-01 |
| C1orf132      | -0.06 | 7.55E-01 | -0.32 | 1.02E-01 |
| FAM120C       | -0.04 | 8.36E-01 | -0.32 | 1.02E-01 |
| FASLG         | 0.01  | 9.42E-01 | 0.32  | 1.02E-01 |
| LHFPL3        | -0.28 | 1.47E-01 | -0.32 | 1.02E-01 |
| LINC00641     | -0.19 | 3.29E-01 | -0.32 | 1.02E-01 |
| OGN           | -0.12 | 5.47E-01 | -0.32 | 1.02E-01 |
| PPEF1         | -0.14 | 4.65E-01 | -0.32 | 1.02E-01 |
| RP1-292B18.1  | 0.26  | 1.78E-01 | 0.32  | 1.02E-01 |
| RP11-411B10.8 | -0.03 | 8.73E-01 | -0.32 | 1.02E-01 |
| RP11-651P23.2 | -0.17 | 3.77E-01 | -0.32 | 1.02E-01 |
| RP11-839G9.1  | -0.13 | 5.23E-01 | -0.32 | 1.02E-01 |

|               |       |          |       |          |
|---------------|-------|----------|-------|----------|
| RP4-635A23.4  | 0.00  | 9.93E-01 | 0.32  | 1.02E-01 |
| ADAMTS9-AS1   | 0.00  | 9.85E-01 | -0.32 | 1.02E-01 |
| CCT6P1        | 0.02  | 9.09E-01 | -0.32 | 1.02E-01 |
| EPS15         | -0.06 | 7.69E-01 | -0.32 | 1.02E-01 |
| FAM167B       | 0.19  | 3.39E-01 | 0.32  | 1.02E-01 |
| G11672        | -0.04 | 8.38E-01 | -0.32 | 1.02E-01 |
| LCN2          | 0.28  | 1.47E-01 | 0.32  | 1.02E-01 |
| LLNLF-158E9.1 | -0.01 | 9.50E-01 | -0.32 | 1.02E-01 |
| MUT           | 0.04  | 8.50E-01 | -0.32 | 1.02E-01 |
| MYBL1         | -0.04 | 8.26E-01 | -0.32 | 1.02E-01 |
| PLEKHA7       | 0.24  | 2.18E-01 | 0.32  | 1.02E-01 |
| RNA5SP345     | -0.02 | 9.14E-01 | -0.32 | 1.02E-01 |
| RP11-646I6.6  | -0.13 | 4.99E-01 | -0.32 | 1.02E-01 |
| RTTN          | -0.19 | 3.40E-01 | -0.32 | 1.02E-01 |
| SEC24B-AS1    | -0.11 | 5.82E-01 | -0.32 | 1.02E-01 |
| SEMA3D        | -0.31 | 1.14E-01 | -0.32 | 1.02E-01 |
| SETP20        | -0.12 | 5.53E-01 | -0.32 | 1.02E-01 |
| WDR78         | -0.26 | 1.90E-01 | -0.32 | 1.02E-01 |
| AGAP1-IT1     | -0.02 | 9.33E-01 | -0.32 | 1.02E-01 |
| CH507-9B2.5   | 0.11  | 5.79E-01 | 0.32  | 1.02E-01 |
| EPM2AIP1      | 0.03  | 8.99E-01 | -0.32 | 1.02E-01 |
| GPD1          | -0.07 | 7.38E-01 | -0.32 | 1.02E-01 |
| KCNK10        | 0.07  | 7.07E-01 | 0.32  | 1.02E-01 |
| ZDHHC15       | -0.11 | 5.71E-01 | -0.32 | 1.02E-01 |
| C21orf91      | 0.13  | 4.93E-01 | 0.32  | 1.03E-01 |
| CD3E          | 0.25  | 1.98E-01 | 0.32  | 1.03E-01 |
| CTD-2129N1.1  | 0.53  | 4.05E-03 | -0.32 | 1.03E-01 |
| G39617        | 0.13  | 5.03E-01 | -0.32 | 1.03E-01 |
| IGHG1         | 0.43  | 2.27E-02 | 0.32  | 1.03E-01 |
| LRRCC1        | -0.50 | 6.89E-03 | -0.32 | 1.03E-01 |
| MBOAT7        | 0.24  | 2.27E-01 | 0.32  | 1.03E-01 |
| MOK           | -0.29 | 1.32E-01 | -0.32 | 1.03E-01 |
| SLFNL1        | -0.19 | 3.32E-01 | -0.32 | 1.03E-01 |
| SRD5A2        | -0.05 | 8.04E-01 | 0.32  | 1.03E-01 |
| SV2C          | -0.17 | 3.75E-01 | 0.32  | 1.03E-01 |
| TTC19         | 0.17  | 3.74E-01 | -0.32 | 1.03E-01 |
| VHL           | 0.33  | 8.37E-02 | 0.32  | 1.03E-01 |
| CDKL2         | -0.27 | 1.68E-01 | -0.32 | 1.03E-01 |
| DNAJC4        | -0.21 | 2.74E-01 | 0.32  | 1.03E-01 |
| EHHADH        | 0.14  | 4.76E-01 | 0.32  | 1.03E-01 |
| G5265         | -0.48 | 1.03E-02 | -0.32 | 1.03E-01 |
| HORMAD2-AS1   | -0.08 | 6.77E-01 | -0.32 | 1.03E-01 |
| IL13RA1       | 0.29  | 1.39E-01 | 0.32  | 1.03E-01 |
| MEIOB         | 0.03  | 8.70E-01 | -0.32 | 1.03E-01 |
| MMRN2         | -0.11 | 5.60E-01 | -0.32 | 1.03E-01 |
| RP11-686O6.1  | -0.14 | 4.93E-01 | -0.32 | 1.03E-01 |
| UCA1          | 0.08  | 6.92E-01 | 0.32  | 1.03E-01 |

|                         |       |          |       |          |
|-------------------------|-------|----------|-------|----------|
| <b>C9orf41-AS1</b>      | 0.02  | 9.04E-01 | -0.32 | 1.03E-01 |
| <b>CFAP99</b>           | -0.04 | 8.28E-01 | 0.32  | 1.03E-01 |
| <b>CLVS2</b>            | -0.06 | 7.58E-01 | -0.32 | 1.03E-01 |
| <b>DIO3</b>             | 0.27  | 1.68E-01 | -0.32 | 1.03E-01 |
| <b>GYG2</b>             | -0.41 | 2.95E-02 | -0.32 | 1.03E-01 |
| <b>KRT6A</b>            | 0.20  | 3.00E-01 | 0.32  | 1.03E-01 |
| <b>LINC00238</b>        | -0.32 | 9.74E-02 | -0.32 | 1.03E-01 |
| <b>OOEP</b>             | 0.21  | 2.90E-01 | 0.32  | 1.03E-01 |
| <b>RP11-468E2.5</b>     | -0.05 | 8.11E-01 | 0.32  | 1.03E-01 |
| <b>SP8</b>              | -0.12 | 5.41E-01 | -0.32 | 1.03E-01 |
| <b>AC022007.5</b>       | -0.21 | 2.89E-01 | -0.32 | 1.04E-01 |
| <b>CTD-2047H16.3</b>    | 0.05  | 8.15E-01 | 0.32  | 1.04E-01 |
| <b>FAM76B</b>           | -0.07 | 7.38E-01 | -0.32 | 1.04E-01 |
| <b>HIVEP1</b>           | -0.34 | 7.44E-02 | -0.32 | 1.04E-01 |
| <b>KLHDC7B</b>          | 0.26  | 1.89E-01 | 0.32  | 1.04E-01 |
| <b>PTPRM</b>            | -0.43 | 2.22E-02 | -0.32 | 1.04E-01 |
| <b>RP11-399O19.9</b>    | -0.16 | 4.21E-01 | -0.32 | 1.04E-01 |
| <b>SPEF2</b>            | 0.01  | 9.64E-01 | -0.32 | 1.04E-01 |
| <b>SRY</b>              | 0.26  | 1.78E-01 | 0.32  | 1.04E-01 |
| <b>ZNF528-AS1</b>       | -0.40 | 3.66E-02 | -0.32 | 1.04E-01 |
| <b>AADAACL2</b>         | -0.19 | 3.41E-01 | -0.32 | 1.04E-01 |
| <b>CACNA1E</b>          | 0.06  | 7.70E-01 | -0.32 | 1.04E-01 |
| <b>CNGA1</b>            | -0.26 | 1.74E-01 | -0.32 | 1.04E-01 |
| <b>CORO1B</b>           | 0.26  | 1.74E-01 | 0.32  | 1.04E-01 |
| <b>ETHE1</b>            | 0.42  | 2.68E-02 | 0.32  | 1.04E-01 |
| <b>FCF1P5</b>           | -0.01 | 9.67E-01 | -0.32 | 1.04E-01 |
| <b>PCF11</b>            | -0.15 | 4.60E-01 | -0.32 | 1.04E-01 |
| <b>PLA2G7</b>           | -0.08 | 6.73E-01 | -0.32 | 1.04E-01 |
| <b>RP11-342I1.2</b>     | -0.11 | 5.68E-01 | -0.32 | 1.04E-01 |
| <b>RP11-473M20.11</b>   | -0.24 | 2.24E-01 | 0.32  | 1.04E-01 |
| <b>TPM3P9</b>           | -0.13 | 5.22E-01 | -0.32 | 1.04E-01 |
| <b>UBXN10</b>           | -0.06 | 7.69E-01 | -0.32 | 1.04E-01 |
| <b>AC002451.3</b>       | -0.16 | 4.15E-01 | -0.32 | 1.04E-01 |
| <b>DNM1P35</b>          | -0.13 | 5.14E-01 | -0.32 | 1.04E-01 |
| <b>ORC4</b>             | -0.07 | 7.26E-01 | -0.32 | 1.04E-01 |
| <b>RP11-509J21.4</b>    | -0.19 | 3.25E-01 | -0.32 | 1.04E-01 |
| <b>RPGR</b>             | -0.02 | 9.08E-01 | -0.32 | 1.04E-01 |
| <b>KXbac-B476C20.13</b> | -0.05 | 7.85E-01 | -0.32 | 1.04E-01 |
| <b>FAM65C</b>           | 0.14  | 4.79E-01 | 0.32  | 1.04E-01 |
| <b>FAM84A</b>           | 0.30  | 1.18E-01 | 0.32  | 1.04E-01 |
| <b>SFXN5</b>            | 0.26  | 1.79E-01 | 0.32  | 1.04E-01 |
| <b>ZNF354A</b>          | 0.09  | 6.47E-01 | 0.32  | 1.04E-01 |
| <b>DOK6</b>             | -0.35 | 6.44E-02 | -0.32 | 1.05E-01 |
| <b>PPP3CC</b>           | -0.11 | 5.77E-01 | -0.32 | 1.05E-01 |
| <b>RP11-311F12.2</b>    | -0.06 | 7.72E-01 | 0.32  | 1.05E-01 |
| <b>RP11-85K15.3</b>     | 0.03  | 8.87E-01 | -0.32 | 1.05E-01 |
| <b>SPESP1</b>           | -0.21 | 2.89E-01 | 0.32  | 1.05E-01 |

|               |       |          |       |          |
|---------------|-------|----------|-------|----------|
| WDR31         | -0.11 | 5.87E-01 | 0.32  | 1.05E-01 |
| ADM2          | 0.17  | 4.00E-01 | 0.32  | 1.05E-01 |
| ALDH3A2       | -0.23 | 2.31E-01 | -0.32 | 1.05E-01 |
| C17orf75      | 0.17  | 3.86E-01 | 0.32  | 1.05E-01 |
| C2orf48       | 0.00  | 9.80E-01 | -0.32 | 1.05E-01 |
| CSNK1G2P1     | -0.28 | 1.47E-01 | 0.32  | 1.05E-01 |
| G36147        | -0.14 | 4.78E-01 | -0.32 | 1.05E-01 |
| GAA           | 0.31  | 1.11E-01 | 0.32  | 1.05E-01 |
| GABBR2        | 0.19  | 3.23E-01 | 0.32  | 1.05E-01 |
| IDE           | 0.02  | 9.24E-01 | 0.32  | 1.05E-01 |
| IGKV2-24      | -0.11 | 5.91E-01 | -0.32 | 1.05E-01 |
| IKBKGP1       | -0.10 | 6.27E-01 | 0.32  | 1.05E-01 |
| LINC01133     | -0.04 | 8.26E-01 | -0.32 | 1.05E-01 |
| MAEL          | -0.05 | 7.86E-01 | -0.32 | 1.05E-01 |
| RP11-191A15.1 | -0.12 | 5.50E-01 | -0.32 | 1.05E-01 |
| UBL5P2        | -0.27 | 1.63E-01 | -0.32 | 1.05E-01 |
| ZNF646        | 0.16  | 4.13E-01 | 0.32  | 1.05E-01 |
| CARD11        | 0.19  | 3.30E-01 | 0.32  | 1.05E-01 |
| CTD-3222D19.8 | 0.11  | 5.77E-01 | -0.32 | 1.05E-01 |
| CYP2W1        | -0.26 | 1.88E-01 | -0.32 | 1.05E-01 |
| DDX3Y         | 0.29  | 1.29E-01 | 0.32  | 1.05E-01 |
| GAS6-AS2      | 0.28  | 1.51E-01 | 0.32  | 1.05E-01 |
| GATA6         | -0.24 | 2.18E-01 | -0.32 | 1.05E-01 |
| IRAK4         | -0.04 | 8.54E-01 | 0.32  | 1.05E-01 |
| MTSS1         | 0.31  | 1.05E-01 | 0.32  | 1.05E-01 |
| NKIRAS2       | 0.34  | 7.79E-02 | 0.32  | 1.05E-01 |
| PLPP4         | -0.15 | 4.55E-01 | -0.32 | 1.05E-01 |
| RN7SL608P     | 0.10  | 6.08E-01 | -0.32 | 1.05E-01 |
| RP11-242D8.3  | -0.20 | 2.98E-01 | -0.32 | 1.05E-01 |
| SLC22A16      | -0.22 | 2.51E-01 | 0.32  | 1.05E-01 |
| TCHH          | -0.09 | 6.60E-01 | 0.32  | 1.05E-01 |
| XLOC_003809   | 0.29  | 1.31E-01 | 0.32  | 1.05E-01 |
| ZNF772        | 0.17  | 3.96E-01 | -0.32 | 1.05E-01 |
| APLN          | 0.15  | 4.43E-01 | -0.32 | 1.06E-01 |
| ARHGAP12      | -0.26 | 1.90E-01 | -0.32 | 1.06E-01 |
| ARHGAP5-AS1   | 0.24  | 2.28E-01 | 0.32  | 1.06E-01 |
| BEND6         | -0.23 | 2.44E-01 | 0.32  | 1.06E-01 |
| CCRL2         | 0.08  | 6.80E-01 | 0.32  | 1.06E-01 |
| CDC42BPA      | -0.23 | 2.47E-01 | -0.32 | 1.06E-01 |
| CRADD         | 0.08  | 6.77E-01 | 0.32  | 1.06E-01 |
| CSNK1A1P1     | 0.08  | 6.79E-01 | -0.32 | 1.06E-01 |
| IRS2          | -0.14 | 4.82E-01 | -0.32 | 1.06E-01 |
| MIR221        | 0.09  | 6.55E-01 | 0.32  | 1.06E-01 |
| PSTPIP2       | 0.35  | 6.66E-02 | 0.32  | 1.06E-01 |
| RP11-777F6.3  | -0.09 | 6.60E-01 | -0.32 | 1.06E-01 |
| SH2D3C        | -0.08 | 6.73E-01 | 0.32  | 1.06E-01 |
| WDR45         | 0.25  | 2.01E-01 | 0.32  | 1.06E-01 |

|                      |       |          |       |          |
|----------------------|-------|----------|-------|----------|
| <b>XLOC_012720</b>   | -0.02 | 9.36E-01 | -0.32 | 1.06E-01 |
| <b>AC012074.2</b>    | -0.08 | 6.72E-01 | -0.32 | 1.06E-01 |
| <b>CTD-2270N23.1</b> | -0.01 | 9.50E-01 | -0.32 | 1.06E-01 |
| <b>CXCR3</b>         | 0.20  | 3.17E-01 | 0.32  | 1.06E-01 |
| <b>EIF2A</b>         | 0.13  | 4.96E-01 | -0.32 | 1.06E-01 |
| <b>EXOC3L4</b>       | 0.07  | 7.13E-01 | 0.32  | 1.06E-01 |
| <b>FGD2</b>          | 0.26  | 1.83E-01 | 0.32  | 1.06E-01 |
| <b>MTCO1P19</b>      | 0.03  | 8.77E-01 | 0.32  | 1.06E-01 |
| <b>MYO7A</b>         | 0.02  | 9.36E-01 | 0.32  | 1.06E-01 |
| <b>POU5F1B</b>       | 0.00  | 9.83E-01 | -0.32 | 1.06E-01 |
| <b>RNF214</b>        | -0.21 | 2.82E-01 | 0.32  | 1.06E-01 |
| <b>RP11-404O13.4</b> | 0.10  | 6.15E-01 | 0.32  | 1.06E-01 |
| <b>VGLL4</b>         | 0.02  | 9.18E-01 | 0.32  | 1.06E-01 |
| <b>AC011997.1</b>    | 0.14  | 4.74E-01 | -0.32 | 1.06E-01 |
| <b>CCNT2</b>         | -0.27 | 1.68E-01 | -0.32 | 1.06E-01 |
| <b>CTD-2651B20.4</b> | 0.13  | 5.01E-01 | -0.32 | 1.06E-01 |
| <b>EML3</b>          | 0.07  | 7.15E-01 | 0.32  | 1.06E-01 |
| <b>LINC00683</b>     | -0.04 | 8.25E-01 | 0.32  | 1.06E-01 |
| <b>LINC00689</b>     | -0.19 | 3.26E-01 | 0.32  | 1.06E-01 |
| <b>MTCO2P19</b>      | 0.10  | 6.12E-01 | -0.32 | 1.06E-01 |
| <b>RP11-192H23.8</b> | -0.11 | 5.88E-01 | -0.32 | 1.06E-01 |
| <b>RP5-1091N2.9</b>  | -0.06 | 7.79E-01 | 0.32  | 1.06E-01 |
| <b>TET3</b>          | -0.04 | 8.26E-01 | -0.32 | 1.06E-01 |
| <b>BHMT2</b>         | -0.30 | 1.27E-01 | -0.32 | 1.07E-01 |
| <b>CHFR</b>          | 0.11  | 5.84E-01 | 0.32  | 1.07E-01 |
| <b>CTAGE9</b>        | 0.09  | 6.37E-01 | -0.32 | 1.07E-01 |
| <b>JMY</b>           | 0.14  | 4.78E-01 | 0.32  | 1.07E-01 |
| <b>NSMCE4A</b>       | -0.13 | 4.93E-01 | -0.32 | 1.07E-01 |
| <b>RP3-337H4.9</b>   | -0.09 | 6.42E-01 | -0.32 | 1.07E-01 |
| <b>SFTPB</b>         | -0.07 | 7.31E-01 | 0.32  | 1.07E-01 |
| <b>SLAMF1</b>        | 0.20  | 3.11E-01 | 0.32  | 1.07E-01 |
| <b>TRPM8</b>         | -0.20 | 3.12E-01 | -0.32 | 1.07E-01 |
| <b>AF196972.9</b>    | 0.01  | 9.63E-01 | 0.32  | 1.07E-01 |
| <b>CLHC1</b>         | -0.34 | 7.79E-02 | -0.32 | 1.07E-01 |
| <b>G21027</b>        | -0.21 | 2.82E-01 | -0.32 | 1.07E-01 |
| <b>GS1-204I12.4</b>  | 0.27  | 1.69E-01 | 0.32  | 1.07E-01 |
| <b>RGS3</b>          | 0.31  | 1.08E-01 | 0.32  | 1.07E-01 |
| <b>RP11-158M2.6</b>  | -0.11 | 5.66E-01 | -0.32 | 1.07E-01 |
| <b>CSRP2BP</b>       | 0.04  | 8.39E-01 | -0.32 | 1.07E-01 |
| <b>CTD-2012J19.1</b> | 0.04  | 8.25E-01 | -0.32 | 1.07E-01 |
| <b>EIF1AX-AS1</b>    | -0.25 | 2.00E-01 | -0.32 | 1.07E-01 |
| <b>G14609</b>        | -0.15 | 4.50E-01 | -0.32 | 1.07E-01 |
| <b>HABP4</b>         | -0.33 | 8.75E-02 | -0.32 | 1.07E-01 |
| <b>RNA5SP141</b>     | 0.02  | 9.31E-01 | -0.32 | 1.07E-01 |
| <b>RP11-264B17.3</b> | 0.06  | 7.62E-01 | -0.32 | 1.07E-01 |
| <b>SAMD5</b>         | -0.06 | 7.43E-01 | -0.32 | 1.07E-01 |
| <b>SGSM1</b>         | -0.17 | 3.86E-01 | -0.32 | 1.07E-01 |



|               |       |          |       |          |
|---------------|-------|----------|-------|----------|
| SH3KBP1       | 0.18  | 3.57E-01 | -0.32 | 1.07E-01 |
| UGT3A1        | -0.02 | 9.11E-01 | -0.32 | 1.07E-01 |
| USP54         | -0.15 | 4.55E-01 | -0.32 | 1.07E-01 |
| ZXDA          | -0.20 | 3.05E-01 | -0.32 | 1.07E-01 |
| CSNK1G1       | 0.18  | 3.70E-01 | 0.32  | 1.08E-01 |
| DRAM2         | 0.28  | 1.54E-01 | 0.32  | 1.08E-01 |
| KCNN3         | 0.20  | 2.97E-01 | 0.32  | 1.08E-01 |
| LCE2A         | 0.10  | 5.95E-01 | 0.32  | 1.08E-01 |
| LINC01186     | 0.13  | 5.23E-01 | -0.32 | 1.08E-01 |
| RP11-114B7.6  | 0.14  | 4.84E-01 | 0.32  | 1.08E-01 |
| RP11-523H20.3 | -0.29 | 1.30E-01 | 0.32  | 1.08E-01 |
| TDRD6         | -0.02 | 9.32E-01 | -0.32 | 1.08E-01 |
| CTD-2566J3.1  | -0.06 | 7.66E-01 | -0.32 | 1.08E-01 |
| G15152        | -0.29 | 1.33E-01 | 0.32  | 1.08E-01 |
| HERC3         | 0.11  | 5.94E-01 | -0.32 | 1.08E-01 |
| HFE           | 0.17  | 3.90E-01 | 0.32  | 1.08E-01 |
| KCNAB1        | -0.17 | 3.78E-01 | -0.32 | 1.08E-01 |
| LPAR5         | 0.20  | 3.11E-01 | 0.32  | 1.08E-01 |
| RP5-1147A1.1  | 0.26  | 1.76E-01 | 0.32  | 1.08E-01 |
| SCARNA1       | -0.02 | 9.26E-01 | 0.32  | 1.08E-01 |
| STAT6         | -0.06 | 7.81E-01 | 0.32  | 1.08E-01 |
| TXNRD3        | 0.23  | 2.35E-01 | 0.32  | 1.08E-01 |
| C1orf27       | 0.01  | 9.77E-01 | -0.32 | 1.09E-01 |
| CTA-407F11.8  | -0.09 | 6.32E-01 | -0.32 | 1.09E-01 |
| FAM73A        | 0.12  | 5.33E-01 | -0.32 | 1.09E-01 |
| G9978         | -0.19 | 3.32E-01 | -0.32 | 1.09E-01 |
| GRINA         | 0.22  | 2.57E-01 | 0.32  | 1.09E-01 |
| HIBCH         | 0.11  | 5.77E-01 | 0.32  | 1.09E-01 |
| INHBA         | -0.14 | 4.73E-01 | 0.32  | 1.09E-01 |
| MIR4524B      | 0.26  | 1.82E-01 | 0.32  | 1.09E-01 |
| RP11-395N21.2 | -0.35 | 6.98E-02 | -0.32 | 1.09E-01 |
| RP11-6F2.5    | -0.19 | 3.46E-01 | -0.32 | 1.09E-01 |
| RP11-930O11.3 | -0.21 | 2.72E-01 | -0.32 | 1.09E-01 |
| SMCR5         | 0.00  | 9.82E-01 | -0.32 | 1.09E-01 |
| XLOC_008299   | 0.37  | 5.35E-02 | 0.32  | 1.09E-01 |
| ZNF425        | 0.26  | 1.79E-01 | 0.32  | 1.09E-01 |
| CARS2         | -0.11 | 5.64E-01 | -0.32 | 1.09E-01 |
| CEMIP         | 0.15  | 4.41E-01 | 0.32  | 1.09E-01 |
| COL2A1        | -0.40 | 3.44E-02 | -0.32 | 1.09E-01 |
| DLEU7         | -0.02 | 9.22E-01 | -0.32 | 1.09E-01 |
| G25047        | -0.26 | 1.79E-01 | -0.32 | 1.09E-01 |
| LCE1F         | 0.05  | 8.09E-01 | 0.32  | 1.09E-01 |
| PAXBP1        | -0.06 | 7.69E-01 | -0.32 | 1.09E-01 |
| RP11-463O9.9  | 0.08  | 6.92E-01 | -0.32 | 1.09E-01 |
| RP11-769N19.2 | 0.09  | 6.57E-01 | 0.32  | 1.09E-01 |
| RPL12P12      | 0.18  | 3.63E-01 | 0.32  | 1.09E-01 |
| SKOR1         | -0.11 | 5.87E-01 | -0.32 | 1.09E-01 |

|               |       |          |       |          |
|---------------|-------|----------|-------|----------|
| TMEM132C      | -0.14 | 4.91E-01 | -0.32 | 1.09E-01 |
| ZNF609        | 0.14  | 4.68E-01 | 0.32  | 1.09E-01 |
| FXYD5         | 0.30  | 1.23E-01 | 0.32  | 1.09E-01 |
| MFI2-AS1      | -0.06 | 7.47E-01 | -0.32 | 1.09E-01 |
| NR1D1         | -0.08 | 7.01E-01 | -0.32 | 1.09E-01 |
| NXN           | 0.32  | 9.18E-02 | 0.32  | 1.09E-01 |
| RIMKLB        | -0.37 | 5.20E-02 | -0.32 | 1.09E-01 |
| RN7SL344P     | -0.03 | 8.76E-01 | 0.32  | 1.09E-01 |
| RP11-361D15.2 | -0.18 | 3.66E-01 | 0.32  | 1.09E-01 |
| SMNDC1        | 0.20  | 3.16E-01 | -0.32 | 1.09E-01 |
| ST7-AS1       | -0.15 | 4.55E-01 | -0.32 | 1.09E-01 |
| CIAO1         | 0.18  | 3.65E-01 | 0.31  | 1.10E-01 |
| ILDR1         | 0.05  | 8.04E-01 | -0.31 | 1.10E-01 |
| KTN1-AS1      | 0.03  | 8.95E-01 | 0.31  | 1.10E-01 |
| RP11-392M9.2  | -0.02 | 9.20E-01 | -0.31 | 1.10E-01 |
| TRPM5         | -0.11 | 5.79E-01 | -0.31 | 1.10E-01 |
| XLOC_014097   | 0.30  | 1.16E-01 | -0.31 | 1.10E-01 |
| AC008592.3    | 0.32  | 1.01E-01 | 0.31  | 1.10E-01 |
| FRMD1         | -0.05 | 8.00E-01 | 0.31  | 1.10E-01 |
| FZD2          | 0.29  | 1.33E-01 | 0.31  | 1.10E-01 |
| IFI6          | 0.31  | 1.06E-01 | 0.31  | 1.10E-01 |
| LINC01411     | 0.23  | 2.45E-01 | 0.31  | 1.10E-01 |
| MST1R         | -0.22 | 2.63E-01 | 0.31  | 1.10E-01 |
| MTX2          | 0.06  | 7.58E-01 | 0.31  | 1.10E-01 |
| NAV1          | 0.17  | 3.84E-01 | 0.31  | 1.10E-01 |
| PPP1R27       | -0.27 | 1.66E-01 | 0.31  | 1.10E-01 |
| RP11-333O1.1  | -0.07 | 7.23E-01 | 0.31  | 1.10E-01 |
| S100A9        | 0.26  | 1.85E-01 | 0.31  | 1.10E-01 |
| TTC39A-AS1    | -0.04 | 8.45E-01 | 0.31  | 1.10E-01 |
| IMMP1L        | -0.19 | 3.22E-01 | -0.31 | 1.10E-01 |
| OLFM4         | -0.42 | 2.58E-02 | -0.31 | 1.10E-01 |
| OR2T11        | -0.30 | 1.15E-01 | -0.31 | 1.10E-01 |
| PMCHL1        | -0.14 | 4.66E-01 | -0.31 | 1.10E-01 |
| RP11-731K22.1 | -0.18 | 3.60E-01 | -0.31 | 1.10E-01 |
| EEF1B2P7      | 0.05  | 7.87E-01 | -0.31 | 1.10E-01 |
| FAM83H-AS1    | 0.09  | 6.47E-01 | 0.31  | 1.10E-01 |
| G32019        | 0.16  | 4.25E-01 | -0.31 | 1.10E-01 |
| HBM           | 0.30  | 1.20E-01 | -0.31 | 1.10E-01 |
| KCNJ11        | -0.08 | 6.99E-01 | -0.31 | 1.10E-01 |
| LETM2         | -0.03 | 8.97E-01 | -0.31 | 1.10E-01 |
| PPP1R3G       | -0.07 | 7.28E-01 | 0.31  | 1.10E-01 |
| TOPBP1        | 0.08  | 7.03E-01 | -0.31 | 1.10E-01 |
| WBP2          | 0.00  | 9.90E-01 | 0.31  | 1.10E-01 |
| YBX2          | -0.25 | 2.00E-01 | -0.31 | 1.10E-01 |
| A4GNT         | -0.16 | 4.11E-01 | -0.31 | 1.11E-01 |
| AC068522.4    | -0.14 | 4.77E-01 | -0.31 | 1.11E-01 |
| AC073957.15   | -0.29 | 1.39E-01 | 0.31  | 1.11E-01 |

|               |       |          |       |          |
|---------------|-------|----------|-------|----------|
| ANKS1A        | 0.30  | 1.27E-01 | 0.31  | 1.11E-01 |
| DNM2          | 0.09  | 6.39E-01 | 0.31  | 1.11E-01 |
| G39215        | 0.07  | 7.16E-01 | -0.31 | 1.11E-01 |
| LINC00526     | -0.25 | 1.91E-01 | 0.31  | 1.11E-01 |
| LMO4          | 0.09  | 6.40E-01 | -0.31 | 1.11E-01 |
| LUC7L2        | -0.10 | 6.12E-01 | -0.31 | 1.11E-01 |
| RNU6-59P      | -0.32 | 1.02E-01 | -0.31 | 1.11E-01 |
| RP11-250B2.4  | 0.15  | 4.41E-01 | -0.31 | 1.11E-01 |
| SULT1A1       | -0.08 | 6.71E-01 | -0.31 | 1.11E-01 |
| BNIP3         | 0.13  | 5.16E-01 | 0.31  | 1.11E-01 |
| CSNK1D        | 0.04  | 8.21E-01 | 0.31  | 1.11E-01 |
| MMACHC        | 0.22  | 2.51E-01 | 0.31  | 1.11E-01 |
| MT-TC         | 0.19  | 3.24E-01 | -0.31 | 1.11E-01 |
| PHF24         | 0.01  | 9.50E-01 | -0.31 | 1.11E-01 |
| RP11-3L21.2   | -0.14 | 4.78E-01 | -0.31 | 1.11E-01 |
| RP11-85G20.1  | -0.12 | 5.40E-01 | 0.31  | 1.11E-01 |
| ZNF615        | -0.19 | 3.33E-01 | -0.31 | 1.11E-01 |
| C11orf68      | -0.06 | 7.47E-01 | 0.31  | 1.11E-01 |
| KRT16         | 0.23  | 2.29E-01 | 0.31  | 1.11E-01 |
| LSM11         | 0.09  | 6.40E-01 | -0.31 | 1.11E-01 |
| MCM9          | 0.24  | 2.28E-01 | -0.31 | 1.11E-01 |
| MIPOL1        | -0.10 | 6.21E-01 | -0.31 | 1.11E-01 |
| NME3          | 0.05  | 8.11E-01 | 0.31  | 1.11E-01 |
| PCDHA3        | -0.06 | 7.45E-01 | 0.31  | 1.11E-01 |
| RP11-85A1.3   | 0.02  | 9.20E-01 | -0.31 | 1.11E-01 |
| S1PR3         | 0.06  | 7.48E-01 | -0.31 | 1.11E-01 |
| TNS3          | 0.16  | 4.29E-01 | 0.31  | 1.11E-01 |
| XLOC_005449   | -0.04 | 8.35E-01 | -0.31 | 1.11E-01 |
| ZNF613        | -0.29 | 1.30E-01 | -0.31 | 1.11E-01 |
| B4GALT4       | -0.35 | 6.61E-02 | 0.31  | 1.12E-01 |
| CASC8         | 0.16  | 4.26E-01 | 0.31  | 1.12E-01 |
| CCBL1         | 0.17  | 3.82E-01 | 0.31  | 1.12E-01 |
| CEP19         | 0.26  | 1.74E-01 | 0.31  | 1.12E-01 |
| CYP19A1       | -0.09 | 6.44E-01 | 0.31  | 1.12E-01 |
| FAM27E2       | 0.09  | 6.47E-01 | 0.31  | 1.12E-01 |
| G35488        | -0.01 | 9.46E-01 | -0.31 | 1.12E-01 |
| SNHG3         | 0.16  | 4.19E-01 | 0.31  | 1.12E-01 |
| SPTLC1P1      | -0.13 | 5.07E-01 | 0.31  | 1.12E-01 |
| USP13         | -0.28 | 1.53E-01 | -0.31 | 1.12E-01 |
| ZNF513        | 0.17  | 3.75E-01 | 0.31  | 1.12E-01 |
| B3GAT3        | -0.15 | 4.59E-01 | 0.31  | 1.12E-01 |
| C11orf57      | -0.04 | 8.37E-01 | -0.31 | 1.12E-01 |
| FPR3          | 0.20  | 3.11E-01 | 0.31  | 1.12E-01 |
| IMPDH1P10     | 0.06  | 7.68E-01 | 0.31  | 1.12E-01 |
| RP11-227D13.2 | 0.34  | 7.72E-02 | -0.31 | 1.12E-01 |
| ZC2HC1B       | -0.04 | 8.30E-01 | -0.31 | 1.12E-01 |
| FERMT2        | 0.02  | 9.11E-01 | -0.31 | 1.13E-01 |

|               |       |          |       |          |
|---------------|-------|----------|-------|----------|
| IGFN1         | 0.23  | 2.37E-01 | 0.31  | 1.13E-01 |
| KLF14         | -0.20 | 3.13E-01 | -0.31 | 1.13E-01 |
| LINC00662     | 0.19  | 3.44E-01 | -0.31 | 1.13E-01 |
| MTIF2         | 0.19  | 3.37E-01 | 0.31  | 1.13E-01 |
| OVOL1         | 0.27  | 1.58E-01 | 0.31  | 1.13E-01 |
| PROSER3       | -0.12 | 5.37E-01 | -0.31 | 1.13E-01 |
| RNF215        | 0.29  | 1.41E-01 | 0.31  | 1.13E-01 |
| RNU6-1019P    | -0.18 | 3.60E-01 | 0.31  | 1.13E-01 |
| RP11-16B13.1  | -0.24 | 2.26E-01 | 0.31  | 1.13E-01 |
| C5orf38       | -0.21 | 2.76E-01 | 0.31  | 1.13E-01 |
| CSPG5         | 0.04  | 8.45E-01 | -0.31 | 1.13E-01 |
| FOXC1         | -0.06 | 7.64E-01 | -0.31 | 1.13E-01 |
| MATN1-AS1     | -0.11 | 5.65E-01 | -0.31 | 1.13E-01 |
| MROH6         | -0.01 | 9.61E-01 | 0.31  | 1.13E-01 |
| PARP14        | 0.26  | 1.81E-01 | 0.31  | 1.13E-01 |
| PRDM15        | -0.17 | 3.79E-01 | 0.31  | 1.13E-01 |
| PRKG2         | -0.22 | 2.59E-01 | -0.31 | 1.13E-01 |
| RP11-40B20.1  | 0.01  | 9.53E-01 | -0.31 | 1.13E-01 |
| SLC9B1        | -0.12 | 5.27E-01 | -0.31 | 1.13E-01 |
| TTC3          | -0.17 | 3.92E-01 | -0.31 | 1.13E-01 |
| ADAMTS9       | -0.21 | 2.91E-01 | -0.31 | 1.13E-01 |
| C5orf15       | 0.04  | 8.33E-01 | -0.31 | 1.13E-01 |
| CBLL1         | 0.03  | 8.82E-01 | -0.31 | 1.13E-01 |
| CYP3A43       | 0.07  | 7.15E-01 | -0.31 | 1.13E-01 |
| EDA           | -0.33 | 8.45E-02 | -0.31 | 1.13E-01 |
| G36217        | -0.08 | 6.89E-01 | -0.31 | 1.13E-01 |
| LRRC32        | -0.23 | 2.47E-01 | 0.31  | 1.13E-01 |
| RNU2-59P      | 0.25  | 2.00E-01 | 0.31  | 1.13E-01 |
| RP11-157E16.1 | -0.19 | 3.41E-01 | -0.31 | 1.13E-01 |
| RP11-17G2.1   | 0.08  | 6.82E-01 | -0.31 | 1.13E-01 |
| RP11-257I8.2  | 0.02  | 9.21E-01 | -0.31 | 1.13E-01 |
| RP11-462B18.3 | -0.16 | 4.29E-01 | -0.31 | 1.13E-01 |
| RPL23AP72     | -0.03 | 8.89E-01 | -0.31 | 1.13E-01 |
| SMIM13        | 0.05  | 7.96E-01 | -0.31 | 1.13E-01 |
| TESPA1        | -0.02 | 9.17E-01 | 0.31  | 1.13E-01 |
| TMC8          | 0.07  | 7.28E-01 | 0.31  | 1.13E-01 |
| ZNF737        | -0.27 | 1.68E-01 | -0.31 | 1.13E-01 |
| CTA-392E5.1   | 0.12  | 5.38E-01 | 0.31  | 1.14E-01 |
| CXXC5         | -0.07 | 7.17E-01 | 0.31  | 1.14E-01 |
| KIF26B        | 0.09  | 6.47E-01 | 0.31  | 1.14E-01 |
| NCK1          | 0.17  | 3.96E-01 | 0.31  | 1.14E-01 |
| PSMD8P1       | -0.49 | 8.44E-03 | -0.31 | 1.14E-01 |
| RP1-278C19.8  | 0.18  | 3.67E-01 | 0.31  | 1.14E-01 |
| RP11-382A20.3 | -0.08 | 6.73E-01 | -0.31 | 1.14E-01 |
| RP11-48B3.3   | 0.12  | 5.45E-01 | -0.31 | 1.14E-01 |
| RP13-36G14.4  | -0.10 | 6.04E-01 | -0.31 | 1.14E-01 |
| RP3-467L1.6   | 0.43  | 2.14E-02 | -0.31 | 1.14E-01 |

|                       |       |          |       |          |
|-----------------------|-------|----------|-------|----------|
| <b>AC005498.3</b>     | 0.14  | 4.72E-01 | -0.31 | 1.14E-01 |
| <b>DPP4</b>           | -0.32 | 1.01E-01 | 0.31  | 1.14E-01 |
| <b>KIAA1958</b>       | -0.08 | 6.84E-01 | -0.31 | 1.14E-01 |
| <b>ORMDL1</b>         | 0.03  | 8.67E-01 | -0.31 | 1.14E-01 |
| <b>RP11-830F9.5</b>   | 0.23  | 2.38E-01 | -0.31 | 1.14E-01 |
| <b>SGCE</b>           | -0.47 | 1.11E-02 | -0.31 | 1.14E-01 |
| <b>SH3TC2</b>         | -0.25 | 1.92E-01 | -0.31 | 1.14E-01 |
| <b>SPATS2L</b>        | -0.11 | 5.61E-01 | -0.31 | 1.14E-01 |
| <b>TPI1P2</b>         | 0.09  | 6.63E-01 | 0.31  | 1.14E-01 |
| <b>TTLL13P</b>        | -0.01 | 9.61E-01 | -0.31 | 1.14E-01 |
| <b>XLOC_011603</b>    | 0.18  | 3.49E-01 | 0.31  | 1.14E-01 |
| <b>ZBED9</b>          | -0.15 | 4.41E-01 | -0.31 | 1.14E-01 |
| <b>AC007285.7</b>     | -0.23 | 2.29E-01 | -0.31 | 1.14E-01 |
| <b>AK9</b>            | -0.09 | 6.65E-01 | -0.31 | 1.14E-01 |
| <b>C19orf66</b>       | 0.38  | 4.74E-02 | 0.31  | 1.14E-01 |
| <b>G26051</b>         | -0.11 | 5.61E-01 | -0.31 | 1.14E-01 |
| <b>G36170</b>         | -0.11 | 5.92E-01 | -0.31 | 1.14E-01 |
| <b>GZMK</b>           | 0.03  | 8.91E-01 | -0.31 | 1.14E-01 |
| <b>HCN2</b>           | 0.00  | 9.85E-01 | 0.31  | 1.14E-01 |
| <b>HP1BP3</b>         | 0.09  | 6.55E-01 | -0.31 | 1.14E-01 |
| <b>KALRN</b>          | 0.15  | 4.54E-01 | 0.31  | 1.14E-01 |
| <b>KLHL22</b>         | -0.20 | 3.18E-01 | 0.31  | 1.14E-01 |
| <b>MAGEA11</b>        | 0.05  | 8.16E-01 | -0.31 | 1.14E-01 |
| <b>PPP1R3D</b>        | 0.27  | 1.57E-01 | 0.31  | 1.14E-01 |
| <b>RBM19</b>          | 0.01  | 9.63E-01 | 0.31  | 1.14E-01 |
| <b>RP11-565F19.4</b>  | -0.34 | 7.64E-02 | -0.31 | 1.14E-01 |
| <b>RP11-769O8.3</b>   | 0.03  | 8.62E-01 | -0.31 | 1.14E-01 |
| <b>UBAC2</b>          | 0.23  | 2.31E-01 | 0.31  | 1.14E-01 |
| <b>USP20</b>          | 0.25  | 1.91E-01 | 0.31  | 1.14E-01 |
| <b>ACE</b>            | -0.12 | 5.27E-01 | 0.31  | 1.15E-01 |
| <b>CRTC2</b>          | -0.02 | 9.12E-01 | 0.31  | 1.15E-01 |
| <b>FAM217B</b>        | 0.26  | 1.86E-01 | 0.31  | 1.15E-01 |
| <b>LINC01132</b>      | -0.09 | 6.36E-01 | 0.31  | 1.15E-01 |
| <b>RICTOR</b>         | -0.29 | 1.38E-01 | -0.31 | 1.15E-01 |
| <b>TRDN</b>           | -0.05 | 7.94E-01 | -0.31 | 1.15E-01 |
| <b>VAV1</b>           | 0.12  | 5.41E-01 | 0.31  | 1.15E-01 |
| <b>AC011330.13</b>    | -0.20 | 2.98E-01 | 0.31  | 1.15E-01 |
| <b>BBS4</b>           | 0.19  | 3.31E-01 | 0.31  | 1.15E-01 |
| <b>CSK</b>            | 0.49  | 8.19E-03 | 0.31  | 1.15E-01 |
| <b>FBXO33</b>         | 0.15  | 4.47E-01 | -0.31 | 1.15E-01 |
| <b>LA16c-313D11.9</b> | -0.07 | 7.29E-01 | -0.31 | 1.15E-01 |
| <b>MAP4</b>           | 0.07  | 7.26E-01 | 0.31  | 1.15E-01 |
| <b>RP11-184I16.3</b>  | -0.05 | 7.99E-01 | 0.31  | 1.15E-01 |
| <b>RP11-34F20.7</b>   | -0.10 | 6.13E-01 | 0.31  | 1.15E-01 |
| <b>SLC25A11</b>       | 0.20  | 3.05E-01 | 0.31  | 1.15E-01 |
| <b>TNFAIP2</b>        | 0.11  | 5.68E-01 | 0.31  | 1.15E-01 |
| <b>TNIP1</b>          | 0.27  | 1.70E-01 | 0.31  | 1.15E-01 |

|               |       |          |       |          |
|---------------|-------|----------|-------|----------|
| ANKRD28       | -0.05 | 8.11E-01 | -0.31 | 1.16E-01 |
| GADD45G       | 0.03  | 8.90E-01 | 0.31  | 1.16E-01 |
| LENEP         | 0.30  | 1.16E-01 | -0.31 | 1.16E-01 |
| LGALSL        | -0.28 | 1.42E-01 | -0.31 | 1.16E-01 |
| RNU2-39P      | 0.05  | 7.97E-01 | -0.31 | 1.16E-01 |
| RP1-101A2.1   | 0.08  | 6.90E-01 | -0.31 | 1.16E-01 |
| RP11-452H21.1 | -0.34 | 7.74E-02 | -0.31 | 1.16E-01 |
| RP11-6O2.4    | -0.23 | 2.32E-01 | -0.31 | 1.16E-01 |
| RP11-86H7.6   | 0.10  | 6.19E-01 | -0.31 | 1.16E-01 |
| RP11-91A18.4  | 0.57  | 1.71E-03 | -0.31 | 1.16E-01 |
| SNHG7         | 0.17  | 3.89E-01 | 0.31  | 1.16E-01 |
| SYNE2         | -0.38 | 4.90E-02 | -0.31 | 1.16E-01 |
| TENM2         | 0.09  | 6.33E-01 | 0.31  | 1.16E-01 |
| USP28         | 0.08  | 6.79E-01 | 0.31  | 1.16E-01 |
| AC007292.4    | 0.55  | 2.50E-03 | 0.31  | 1.16E-01 |
| B3GNT6        | 0.27  | 1.65E-01 | 0.31  | 1.16E-01 |
| CCDC28B       | -0.14 | 4.63E-01 | -0.31 | 1.16E-01 |
| DNASE1L1      | 0.31  | 1.12E-01 | 0.31  | 1.16E-01 |
| ERICD         | -0.14 | 4.71E-01 | 0.31  | 1.16E-01 |
| FAM219B       | 0.07  | 7.40E-01 | 0.31  | 1.16E-01 |
| GTF2F2        | -0.35 | 6.94E-02 | -0.31 | 1.16E-01 |
| KHK           | 0.05  | 8.04E-01 | -0.31 | 1.16E-01 |
| KIAA0232      | -0.26 | 1.87E-01 | -0.31 | 1.16E-01 |
| KIAA1328      | -0.17 | 3.80E-01 | -0.31 | 1.16E-01 |
| RCOR2         | 0.01  | 9.48E-01 | 0.31  | 1.16E-01 |
| SLC17A5       | 0.14  | 4.68E-01 | -0.31 | 1.16E-01 |
| SNORA64       | -0.01 | 9.75E-01 | 0.31  | 1.16E-01 |
| TNFRSF1B      | 0.07  | 7.24E-01 | 0.31  | 1.16E-01 |
| ZNF488        | 0.01  | 9.63E-01 | 0.31  | 1.16E-01 |
| AC004870.5    | 0.27  | 1.67E-01 | 0.31  | 1.16E-01 |
| CMPK2         | 0.34  | 7.37E-02 | 0.31  | 1.16E-01 |
| CNNM3         | 0.12  | 5.42E-01 | 0.31  | 1.16E-01 |
| CSPP1         | -0.21 | 2.83E-01 | -0.31 | 1.16E-01 |
| CYP26C1       | 0.08  | 6.95E-01 | -0.31 | 1.16E-01 |
| DNALI1        | 0.09  | 6.67E-01 | -0.31 | 1.16E-01 |
| FIGN          | -0.19 | 3.26E-01 | 0.31  | 1.16E-01 |
| G2608         | 0.47  | 1.18E-02 | 0.31  | 1.16E-01 |
| G3878         | -0.03 | 8.87E-01 | 0.31  | 1.16E-01 |
| P3H4          | -0.04 | 8.33E-01 | 0.31  | 1.16E-01 |
| RP11-1236K1.8 | -0.29 | 1.28E-01 | -0.31 | 1.16E-01 |
| RP11-245J9.6  | -0.34 | 7.66E-02 | -0.31 | 1.16E-01 |
| RP11-4K16.2   | -0.10 | 6.20E-01 | -0.31 | 1.16E-01 |
| SPDYE6        | 0.15  | 4.42E-01 | -0.31 | 1.16E-01 |
| TMEM187       | 0.07  | 7.40E-01 | 0.31  | 1.16E-01 |
| XLOC_010725   | -0.38 | 4.62E-02 | -0.31 | 1.16E-01 |
| ZXDB          | -0.25 | 2.07E-01 | -0.31 | 1.16E-01 |
| DEGS1         | 0.00  | 9.92E-01 | 0.31  | 1.17E-01 |

|                |       |          |       |          |
|----------------|-------|----------|-------|----------|
| DOK3           | 0.15  | 4.37E-01 | 0.31  | 1.17E-01 |
| H2AFJ          | 0.18  | 3.57E-01 | 0.31  | 1.17E-01 |
| HIF3A          | -0.04 | 8.23E-01 | 0.31  | 1.17E-01 |
| LINC01251      | -0.13 | 4.94E-01 | 0.31  | 1.17E-01 |
| LRRC15         | -0.26 | 1.79E-01 | 0.31  | 1.17E-01 |
| RP11-398K22.12 | 0.11  | 5.84E-01 | 0.31  | 1.17E-01 |
| TFEC           | 0.10  | 6.16E-01 | 0.31  | 1.17E-01 |
| TXNL4B         | 0.22  | 2.60E-01 | 0.31  | 1.17E-01 |
| XLOC_005448    | -0.23 | 2.38E-01 | -0.31 | 1.17E-01 |
| ZMYM6          | -0.14 | 4.68E-01 | -0.31 | 1.17E-01 |
| AC087239.1     | -0.20 | 3.15E-01 | -0.31 | 1.17E-01 |
| C1QA           | 0.20  | 3.09E-01 | 0.31  | 1.17E-01 |
| CH25H          | 0.26  | 1.78E-01 | 0.31  | 1.17E-01 |
| COL16A1        | -0.03 | 8.90E-01 | 0.31  | 1.17E-01 |
| CTB-31O20.2    | -0.06 | 7.81E-01 | -0.31 | 1.17E-01 |
| FRMD8          | 0.48  | 9.47E-03 | 0.31  | 1.17E-01 |
| KRBA2          | 0.01  | 9.72E-01 | 0.31  | 1.17E-01 |
| LA16c-359F1.1  | 0.42  | 2.68E-02 | 0.31  | 1.17E-01 |
| MAPK11         | -0.01 | 9.66E-01 | 0.31  | 1.17E-01 |
| RNY5P8         | -0.21 | 2.81E-01 | 0.31  | 1.17E-01 |
| TERT           | -0.24 | 2.11E-01 | -0.31 | 1.17E-01 |
| TMEM176B       | 0.13  | 5.25E-01 | 0.31  | 1.17E-01 |
| TRPM7          | 0.00  | 9.85E-01 | 0.31  | 1.17E-01 |
| VN1R14P        | -0.12 | 5.33E-01 | -0.31 | 1.17E-01 |
| IL2RG          | 0.09  | 6.52E-01 | 0.31  | 1.17E-01 |
| KIAA1217       | 0.24  | 2.20E-01 | 0.31  | 1.17E-01 |
| OCRL           | -0.11 | 5.63E-01 | -0.31 | 1.17E-01 |
| PBX1           | -0.12 | 5.27E-01 | 0.31  | 1.17E-01 |
| RNU7-171P      | -0.10 | 6.20E-01 | 0.31  | 1.17E-01 |
| RPL5P34        | 0.00  | 9.86E-01 | -0.31 | 1.17E-01 |
| TAP1           | 0.18  | 3.55E-01 | 0.31  | 1.17E-01 |
| AC140076.1     | 0.10  | 5.95E-01 | 0.31  | 1.18E-01 |
| ATP1A3         | 0.32  | 1.01E-01 | 0.31  | 1.18E-01 |
| DISP1          | -0.15 | 4.39E-01 | -0.31 | 1.18E-01 |
| G263           | -0.26 | 1.89E-01 | -0.31 | 1.18E-01 |
| G5850          | -0.03 | 8.92E-01 | -0.31 | 1.18E-01 |
| LINC01605      | 0.22  | 2.64E-01 | 0.31  | 1.18E-01 |
| S100A7A        | 0.14  | 4.66E-01 | 0.31  | 1.18E-01 |
| SERPINB6       | 0.13  | 4.94E-01 | 0.31  | 1.18E-01 |
| SNRPGP1        | 0.08  | 6.81E-01 | -0.31 | 1.18E-01 |
| UCHL1          | -0.16 | 4.29E-01 | -0.31 | 1.18E-01 |
| XLOC_004632    | -0.22 | 2.66E-01 | -0.31 | 1.18E-01 |
| ZHX3           | 0.11  | 5.90E-01 | 0.31  | 1.18E-01 |
| ADGRA3         | -0.20 | 3.04E-01 | -0.31 | 1.18E-01 |
| ADORA2A-AS1    | -0.13 | 5.21E-01 | -0.31 | 1.18E-01 |
| ARHGEF35       | -0.28 | 1.53E-01 | -0.31 | 1.18E-01 |
| BRI3BPP1       | 0.00  | 9.91E-01 | -0.31 | 1.18E-01 |

|                      |       |          |       |          |
|----------------------|-------|----------|-------|----------|
| <b>CTC-287O8.1</b>   | -0.12 | 5.45E-01 | -0.31 | 1.18E-01 |
| <b>CTD-2081C10.5</b> | 0.35  | 6.48E-02 | -0.31 | 1.18E-01 |
| <b>FAM124B</b>       | -0.18 | 3.57E-01 | 0.31  | 1.18E-01 |
| <b>FAM181B</b>       | 0.20  | 3.16E-01 | 0.31  | 1.18E-01 |
| <b>FGFR1OP2</b>      | 0.06  | 7.46E-01 | -0.31 | 1.18E-01 |
| <b>GLS</b>           | -0.04 | 8.37E-01 | -0.31 | 1.18E-01 |
| <b>HSPA8P4</b>       | -0.41 | 2.90E-02 | 0.31  | 1.18E-01 |
| <b>IGLC2</b>         | 0.19  | 3.28E-01 | 0.31  | 1.18E-01 |
| <b>LY96</b>          | 0.19  | 3.25E-01 | 0.31  | 1.18E-01 |
| <b>PPIL2</b>         | 0.08  | 6.95E-01 | 0.31  | 1.18E-01 |
| <b>RN7SL144P</b>     | -0.09 | 6.60E-01 | -0.31 | 1.18E-01 |
| <b>RP11-234K24.3</b> | -0.07 | 7.20E-01 | 0.31  | 1.18E-01 |
| <b>RP11-363L24.3</b> | -0.07 | 7.15E-01 | -0.31 | 1.18E-01 |
| <b>RP11-383G6.3</b>  | -0.10 | 6.24E-01 | -0.31 | 1.18E-01 |
| <b>SCRN3</b>         | 0.20  | 3.05E-01 | 0.31  | 1.18E-01 |
| <b>SLC25A44</b>      | 0.16  | 4.04E-01 | 0.31  | 1.18E-01 |
| <b>VTRNA2-1</b>      | -0.25 | 2.05E-01 | 0.31  | 1.18E-01 |
| <b>CTC-325H20.7</b>  | -0.08 | 6.72E-01 | 0.31  | 1.19E-01 |
| <b>PPCDC</b>         | -0.10 | 6.22E-01 | 0.31  | 1.19E-01 |
| <b>PRR5</b>          | 0.10  | 6.02E-01 | 0.31  | 1.19E-01 |
| <b>SNORA28</b>       | 0.08  | 6.92E-01 | 0.31  | 1.19E-01 |
| <b>C21orf59</b>      | -0.24 | 2.19E-01 | -0.31 | 1.19E-01 |
| <b>FGFRL1</b>        | -0.28 | 1.51E-01 | -0.31 | 1.19E-01 |
| <b>PLGLB1</b>        | -0.19 | 3.36E-01 | -0.31 | 1.19E-01 |
| <b>RNU6-1237P</b>    | -0.02 | 9.27E-01 | -0.31 | 1.19E-01 |
| <b>RNU6-414P</b>     | 0.41  | 2.84E-02 | -0.31 | 1.19E-01 |
| <b>TRAF3IP1</b>      | -0.26 | 1.90E-01 | -0.31 | 1.19E-01 |
| <b>ACAA1</b>         | -0.01 | 9.67E-01 | 0.31  | 1.19E-01 |
| <b>HDAC7</b>         | 0.27  | 1.63E-01 | 0.31  | 1.19E-01 |
| <b>IFT122</b>        | -0.23 | 2.49E-01 | -0.31 | 1.19E-01 |
| <b>IQCJ</b>          | -0.01 | 9.53E-01 | -0.31 | 1.19E-01 |
| <b>KLRF2</b>         | -0.18 | 3.59E-01 | -0.31 | 1.19E-01 |
| <b>LIAS</b>          | 0.24  | 2.20E-01 | 0.31  | 1.19E-01 |
| <b>MIR4473</b>       | -0.27 | 1.61E-01 | -0.31 | 1.19E-01 |
| <b>RN7SKP160</b>     | -0.11 | 5.62E-01 | -0.31 | 1.19E-01 |
| <b>RP11-517I3.2</b>  | 0.37  | 5.40E-02 | -0.31 | 1.19E-01 |
| <b>RP11-6N17.2</b>   | -0.03 | 8.71E-01 | -0.31 | 1.19E-01 |
| <b>SNTA1</b>         | -0.06 | 7.58E-01 | 0.31  | 1.19E-01 |
| <b>TOMM40L</b>       | 0.35  | 6.39E-02 | 0.31  | 1.19E-01 |
| <b>ZNF396</b>        | -0.07 | 7.18E-01 | -0.31 | 1.19E-01 |
| <b>ALB</b>           | -0.14 | 4.91E-01 | -0.31 | 1.19E-01 |
| <b>ARG1</b>          | 0.23  | 2.44E-01 | 0.31  | 1.19E-01 |
| <b>G23016</b>        | -0.41 | 2.99E-02 | -0.31 | 1.19E-01 |
| <b>ITPKC</b>         | 0.18  | 3.57E-01 | 0.31  | 1.19E-01 |
| <b>LAX1</b>          | 0.50  | 6.89E-03 | 0.31  | 1.19E-01 |
| <b>MAN2B1</b>        | 0.11  | 5.92E-01 | 0.31  | 1.19E-01 |
| <b>MIR5194</b>       | -0.09 | 6.62E-01 | 0.31  | 1.19E-01 |



|                      |       |          |       |          |
|----------------------|-------|----------|-------|----------|
| <b>MMP15</b>         | 0.06  | 7.61E-01 | 0.31  | 1.19E-01 |
| <b>RN7SL129P</b>     | -0.16 | 4.23E-01 | 0.31  | 1.19E-01 |
| <b>RNY5P5</b>        | -0.27 | 1.71E-01 | -0.31 | 1.19E-01 |
| <b>RP1-92O14.3</b>   | -0.09 | 6.45E-01 | 0.31  | 1.19E-01 |
| <b>RP11-17M16.2</b>  | -0.02 | 9.10E-01 | 0.31  | 1.19E-01 |
| <b>RRM1-AS1</b>      | 0.00  | 9.86E-01 | -0.31 | 1.19E-01 |
| <b>SIAE</b>          | 0.07  | 7.12E-01 | 0.31  | 1.19E-01 |
| <b>SMTNL2</b>        | -0.13 | 4.93E-01 | -0.31 | 1.19E-01 |
| <b>TOR4A</b>         | 0.44  | 1.91E-02 | 0.31  | 1.19E-01 |
| <b>UNKL</b>          | -0.02 | 9.24E-01 | 0.31  | 1.19E-01 |
| <b>ARHGAP22</b>      | -0.04 | 8.37E-01 | 0.31  | 1.20E-01 |
| <b>C3orf79</b>       | 0.27  | 1.67E-01 | -0.31 | 1.20E-01 |
| <b>CTD-2026D20.3</b> | 0.02  | 9.32E-01 | -0.31 | 1.20E-01 |
| <b>FNTA</b>          | 0.07  | 7.32E-01 | 0.31  | 1.20E-01 |
| <b>GPR65</b>         | 0.15  | 4.40E-01 | 0.31  | 1.20E-01 |
| <b>GPR78</b>         | 0.44  | 1.77E-02 | 0.31  | 1.20E-01 |
| <b>LEMD2</b>         | 0.36  | 5.74E-02 | 0.31  | 1.20E-01 |
| <b>OVCH2</b>         | -0.33 | 8.53E-02 | -0.31 | 1.20E-01 |
| <b>PAEP</b>          | 0.21  | 2.77E-01 | -0.31 | 1.20E-01 |
| <b>RP11-727A23.4</b> | 0.21  | 2.91E-01 | -0.31 | 1.20E-01 |
| <b>UBA7</b>          | 0.22  | 2.60E-01 | 0.31  | 1.20E-01 |
| <b>WDR72</b>         | -0.11 | 5.60E-01 | -0.31 | 1.20E-01 |
| <b>AC046143.2</b>    | 0.05  | 8.04E-01 | -0.31 | 1.20E-01 |
| <b>AP001372.2</b>    | 0.28  | 1.42E-01 | 0.31  | 1.20E-01 |
| <b>C1orf216</b>      | 0.04  | 8.48E-01 | 0.31  | 1.20E-01 |
| <b>CDK9</b>          | 0.19  | 3.45E-01 | 0.31  | 1.20E-01 |
| <b>CORO1A</b>        | 0.19  | 3.22E-01 | 0.31  | 1.20E-01 |
| <b>CYSLTR2</b>       | -0.52 | 4.91E-03 | 0.31  | 1.20E-01 |
| <b>FAM195A</b>       | 0.16  | 4.29E-01 | 0.31  | 1.20E-01 |
| <b>G10801</b>        | 0.43  | 2.27E-02 | 0.31  | 1.20E-01 |
| <b>G6277</b>         | 0.05  | 7.85E-01 | -0.31 | 1.20E-01 |
| <b>LINC00852</b>     | -0.10 | 6.07E-01 | -0.31 | 1.20E-01 |
| <b>NPM1P9</b>        | -0.09 | 6.62E-01 | -0.31 | 1.20E-01 |
| <b>NTRK1</b>         | 0.24  | 2.27E-01 | 0.31  | 1.20E-01 |
| <b>PPAT</b>          | 0.21  | 2.75E-01 | -0.31 | 1.20E-01 |
| <b>SERPINE3</b>      | -0.16 | 4.17E-01 | -0.31 | 1.20E-01 |
| <b>USF2</b>          | -0.07 | 7.25E-01 | 0.31  | 1.20E-01 |
| <b>AC012358.7</b>    | 0.07  | 7.10E-01 | -0.31 | 1.21E-01 |
| <b>BRD2</b>          | 0.02  | 9.39E-01 | 0.31  | 1.21E-01 |
| <b>CTD-2013N17.1</b> | 0.07  | 7.24E-01 | -0.31 | 1.21E-01 |
| <b>MIR3176</b>       | 0.01  | 9.61E-01 | 0.31  | 1.21E-01 |
| <b>RGS12</b>         | 0.49  | 7.79E-03 | 0.31  | 1.21E-01 |
| <b>RORC</b>          | -0.38 | 4.59E-02 | -0.31 | 1.21E-01 |
| <b>RP11-171I2.2</b>  | 0.24  | 2.15E-01 | -0.31 | 1.21E-01 |
| <b>RP11-573G6.6</b>  | -0.26 | 1.86E-01 | 0.31  | 1.21E-01 |
| <b>SLC35A4</b>       | 0.29  | 1.33E-01 | 0.31  | 1.21E-01 |
| <b>AF131215.9</b>    | 0.12  | 5.59E-01 | -0.31 | 1.21E-01 |

|                      |       |          |       |          |
|----------------------|-------|----------|-------|----------|
| <b>AP000439.3</b>    | 0.24  | 2.18E-01 | -0.31 | 1.21E-01 |
| <b>ATP13A1</b>       | 0.29  | 1.39E-01 | 0.31  | 1.21E-01 |
| <b>BX470102.3</b>    | 0.19  | 3.29E-01 | -0.31 | 1.21E-01 |
| <b>C7orf25</b>       | 0.29  | 1.41E-01 | 0.31  | 1.21E-01 |
| <b>CDK11B</b>        | -0.33 | 9.04E-02 | 0.31  | 1.21E-01 |
| <b>CECR1</b>         | 0.22  | 2.56E-01 | 0.31  | 1.21E-01 |
| <b>CIC</b>           | 0.29  | 1.38E-01 | 0.31  | 1.21E-01 |
| <b>DCP2</b>          | 0.34  | 7.39E-02 | 0.31  | 1.21E-01 |
| <b>FAM3C</b>         | -0.03 | 8.93E-01 | -0.31 | 1.21E-01 |
| <b>GK5</b>           | 0.22  | 2.59E-01 | -0.31 | 1.21E-01 |
| <b>HSBP1P1</b>       | -0.10 | 6.24E-01 | 0.31  | 1.21E-01 |
| <b>IL411</b>         | 0.28  | 1.56E-01 | 0.31  | 1.21E-01 |
| <b>PDZD7</b>         | -0.18 | 3.69E-01 | -0.31 | 1.21E-01 |
| <b>RELN</b>          | -0.06 | 7.49E-01 | -0.31 | 1.21E-01 |
| <b>RP11-874G11.1</b> | -0.24 | 2.24E-01 | -0.31 | 1.21E-01 |
| <b>TFPT</b>          | 0.00  | 9.86E-01 | 0.31  | 1.21E-01 |
| <b>TRIM6</b>         | 0.06  | 7.65E-01 | 0.31  | 1.21E-01 |
| <b>WDR83</b>         | 0.19  | 3.39E-01 | 0.31  | 1.21E-01 |
| <b>ZNF223</b>        | 0.11  | 5.93E-01 | -0.31 | 1.21E-01 |
| <b>AC024084.1</b>    | 0.04  | 8.33E-01 | 0.31  | 1.21E-01 |
| <b>BAG5</b>          | 0.12  | 5.33E-01 | -0.31 | 1.21E-01 |
| <b>CPNE2</b>         | 0.08  | 6.76E-01 | 0.31  | 1.21E-01 |
| <b>DDX11L2</b>       | -0.31 | 1.07E-01 | -0.31 | 1.21E-01 |
| <b>DNAH6</b>         | -0.20 | 3.12E-01 | -0.31 | 1.21E-01 |
| <b>G8119</b>         | 0.06  | 7.50E-01 | -0.31 | 1.21E-01 |
| <b>HSPD1P11</b>      | -0.31 | 1.04E-01 | -0.31 | 1.21E-01 |
| <b>ISG15</b>         | 0.35  | 6.73E-02 | 0.31  | 1.21E-01 |
| <b>LINC01534</b>     | 0.08  | 6.71E-01 | -0.31 | 1.21E-01 |
| <b>LPCAT1</b>        | 0.04  | 8.36E-01 | 0.31  | 1.21E-01 |
| <b>MTUS2</b>         | 0.09  | 6.67E-01 | -0.31 | 1.21E-01 |
| <b>RP11-18B3.3</b>   | 0.37  | 5.27E-02 | -0.31 | 1.21E-01 |
| <b>RP11-4L24.4</b>   | 0.06  | 7.52E-01 | -0.31 | 1.21E-01 |
| <b>RP11-93209.7</b>  | -0.10 | 6.10E-01 | -0.31 | 1.21E-01 |
| <b>TRIM17</b>        | 0.19  | 3.26E-01 | 0.31  | 1.21E-01 |
| <b>TYW1B</b>         | 0.34  | 7.97E-02 | 0.31  | 1.21E-01 |
| <b>AC106801.1</b>    | -0.05 | 8.17E-01 | 0.31  | 1.22E-01 |
| <b>ALK</b>           | 0.14  | 4.74E-01 | -0.31 | 1.22E-01 |
| <b>CCDC159</b>       | 0.01  | 9.74E-01 | 0.31  | 1.22E-01 |
| <b>CD19</b>          | 0.06  | 7.80E-01 | -0.31 | 1.22E-01 |
| <b>CTD-2325M2.1</b>  | 0.04  | 8.48E-01 | 0.31  | 1.22E-01 |
| <b>ELOVL3</b>        | 0.15  | 4.50E-01 | -0.31 | 1.22E-01 |
| <b>FCGR3B</b>        | 0.20  | 3.07E-01 | 0.31  | 1.22E-01 |
| <b>FMN1</b>          | -0.34 | 8.13E-02 | -0.31 | 1.22E-01 |
| <b>HPS3</b>          | -0.31 | 1.09E-01 | -0.31 | 1.22E-01 |
| <b>MYB</b>           | -0.23 | 2.33E-01 | -0.31 | 1.22E-01 |
| <b>NCBP2</b>         | 0.22  | 2.66E-01 | 0.31  | 1.22E-01 |
| <b>PTMAP5</b>        | -0.18 | 3.53E-01 | -0.31 | 1.22E-01 |

|                      |       |          |       |          |
|----------------------|-------|----------|-------|----------|
| <b>RNU6-466P</b>     | -0.32 | 9.21E-02 | -0.31 | 1.22E-01 |
| <b>RP11-775D22.3</b> | -0.14 | 4.67E-01 | -0.31 | 1.22E-01 |
| <b>XLOC_005560</b>   | 0.23  | 2.35E-01 | 0.31  | 1.22E-01 |
| <b>AC064836.3</b>    | -0.04 | 8.23E-01 | -0.30 | 1.22E-01 |
| <b>AC135050.5</b>    | -0.02 | 9.17E-01 | 0.30  | 1.22E-01 |
| <b>AP3M1</b>         | -0.05 | 8.12E-01 | 0.30  | 1.22E-01 |
| <b>CTB-36H16.2</b>   | -0.04 | 8.53E-01 | -0.30 | 1.22E-01 |
| <b>CTD-2284J15.1</b> | -0.24 | 2.12E-01 | -0.30 | 1.22E-01 |
| <b>DPYSL3</b>        | -0.38 | 4.90E-02 | -0.30 | 1.22E-01 |
| <b>IZUMO1</b>        | 0.27  | 1.60E-01 | -0.30 | 1.22E-01 |
| <b>LCE6A</b>         | -0.03 | 8.65E-01 | 0.30  | 1.22E-01 |
| <b>MIER3</b>         | 0.13  | 5.08E-01 | -0.30 | 1.22E-01 |
| <b>MTG2</b>          | 0.12  | 5.39E-01 | 0.30  | 1.22E-01 |
| <b>NEBL</b>          | -0.23 | 2.38E-01 | -0.30 | 1.22E-01 |
| <b>RN7SL751P</b>     | -0.39 | 4.00E-02 | 0.30  | 1.22E-01 |
| <b>RP11-375I20.6</b> | -0.08 | 6.99E-01 | -0.30 | 1.22E-01 |
| <b>SERPINB3</b>      | 0.28  | 1.49E-01 | 0.30  | 1.22E-01 |
| <b>TMEM108</b>       | -0.14 | 4.66E-01 | -0.30 | 1.22E-01 |
| <b>TNFRSF10D</b>     | 0.28  | 1.46E-01 | 0.30  | 1.22E-01 |
| <b>CDC23</b>         | 0.21  | 2.79E-01 | 0.30  | 1.22E-01 |
| <b>GRAMD1B</b>       | -0.11 | 5.78E-01 | 0.30  | 1.22E-01 |
| <b>HLA-E</b>         | 0.22  | 2.60E-01 | 0.30  | 1.22E-01 |
| <b>LBH</b>           | -0.02 | 9.29E-01 | 0.30  | 1.22E-01 |
| <b>MFNG</b>          | 0.13  | 5.24E-01 | 0.30  | 1.22E-01 |
| <b>MANBA</b>         | -0.14 | 4.78E-01 | -0.30 | 1.22E-01 |
| <b>MCF2L</b>         | -0.02 | 9.32E-01 | -0.30 | 1.22E-01 |
| <b>RP11-328C8.4</b>  | 0.04  | 8.24E-01 | -0.30 | 1.22E-01 |
| <b>AC107072.2</b>    | 0.04  | 8.24E-01 | -0.30 | 1.23E-01 |
| <b>AC137590.1</b>    | -0.27 | 1.72E-01 | -0.30 | 1.23E-01 |
| <b>ARL4A</b>         | 0.02  | 9.11E-01 | 0.30  | 1.23E-01 |
| <b>CCDC66</b>        | 0.00  | 9.90E-01 | -0.30 | 1.23E-01 |
| <b>CDH2</b>          | -0.17 | 3.76E-01 | -0.30 | 1.23E-01 |
| <b>CDON</b>          | -0.30 | 1.25E-01 | -0.30 | 1.23E-01 |
| <b>FMNL3</b>         | -0.11 | 5.71E-01 | 0.30  | 1.23E-01 |
| <b>KCTD21</b>        | 0.04  | 8.29E-01 | 0.30  | 1.23E-01 |
| <b>MID1</b>          | 0.38  | 4.87E-02 | 0.30  | 1.23E-01 |
| <b>MKNK2</b>         | 0.09  | 6.39E-01 | 0.30  | 1.23E-01 |
| <b>PRR3</b>          | -0.13 | 5.24E-01 | -0.30 | 1.23E-01 |
| <b>RN7SL254P</b>     | 0.10  | 6.05E-01 | 0.30  | 1.23E-01 |
| <b>RP11-21L23.2</b>  | 0.04  | 8.32E-01 | -0.30 | 1.23E-01 |
| <b>RP11-844G16.3</b> | 0.14  | 4.62E-01 | -0.30 | 1.23E-01 |
| <b>1-Sep</b>         | 0.15  | 4.42E-01 | 0.30  | 1.23E-01 |
| <b>SNHG21</b>        | -0.01 | 9.51E-01 | -0.30 | 1.23E-01 |
| <b>SNORD17</b>       | 0.00  | 9.91E-01 | 0.30  | 1.23E-01 |
| <b>SNPH</b>          | 0.06  | 7.49E-01 | 0.30  | 1.23E-01 |
| <b>ST6GALNAC2</b>    | -0.33 | 8.64E-02 | -0.30 | 1.23E-01 |
| <b>ZNF34</b>         | -0.67 | 8.25E-05 | -0.30 | 1.23E-01 |

|                |       |          |       |          |
|----------------|-------|----------|-------|----------|
| EXTL1          | -0.22 | 2.61E-01 | 0.30  | 1.23E-01 |
| OR7C1          | -0.25 | 1.94E-01 | 0.30  | 1.23E-01 |
| RP11-1167A19.2 | -0.26 | 1.89E-01 | 0.30  | 1.23E-01 |
| SPERT          | -0.30 | 1.16E-01 | 0.30  | 1.23E-01 |
| ZNF219         | 0.45  | 1.73E-02 | 0.30  | 1.23E-01 |
| PCDHGA8        | -0.13 | 5.01E-01 | -0.30 | 1.23E-01 |
| UPK1A          | -0.09 | 6.63E-01 | -0.30 | 1.23E-01 |
| ZNF439         | 0.02  | 9.16E-01 | -0.30 | 1.23E-01 |
| ABI2           | -0.28 | 1.53E-01 | -0.30 | 1.24E-01 |
| ALDH7A1        | 0.23  | 2.48E-01 | 0.30  | 1.24E-01 |
| B4GALNT2       | 0.05  | 7.84E-01 | -0.30 | 1.24E-01 |
| C14orf28       | 0.09  | 6.49E-01 | -0.30 | 1.24E-01 |
| C9orf84        | 0.14  | 4.62E-01 | 0.30  | 1.24E-01 |
| CTD-2006C1.13  | -0.22 | 2.70E-01 | 0.30  | 1.24E-01 |
| HLA-DQB2       | 0.12  | 5.39E-01 | -0.30 | 1.24E-01 |
| NOX1           | -0.19 | 3.21E-01 | -0.30 | 1.24E-01 |
| RP11-170N16.3  | 0.31  | 1.04E-01 | 0.30  | 1.24E-01 |
| RP11-530C5.2   | -0.10 | 5.98E-01 | -0.30 | 1.24E-01 |
| RP11-803B1.8   | -0.02 | 9.31E-01 | -0.30 | 1.24E-01 |
| SNORA5C        | 0.31  | 1.07E-01 | 0.30  | 1.24E-01 |
| SNX10          | 0.31  | 1.14E-01 | 0.30  | 1.24E-01 |
| ZNF253         | -0.24 | 2.26E-01 | -0.30 | 1.24E-01 |
| ZSCAN5A        | 0.17  | 3.90E-01 | -0.30 | 1.24E-01 |
| AC006042.7     | 0.04  | 8.44E-01 | -0.30 | 1.24E-01 |
| AL596137.1     | -0.25 | 2.07E-01 | 0.30  | 1.24E-01 |
| KREMEN2        | -0.16 | 4.23E-01 | 0.30  | 1.24E-01 |
| LINC00094      | 0.19  | 3.41E-01 | 0.30  | 1.24E-01 |
| PHYH           | -0.13 | 5.01E-01 | -0.30 | 1.24E-01 |
| PRSS8          | 0.18  | 3.50E-01 | 0.30  | 1.24E-01 |
| RANBP17        | -0.31 | 1.10E-01 | -0.30 | 1.24E-01 |
| RNU4-80P       | -0.05 | 8.01E-01 | -0.30 | 1.24E-01 |
| RP1-221C16.8   | -0.17 | 3.82E-01 | 0.30  | 1.24E-01 |
| RP11-210K20.5  | -0.18 | 3.66E-01 | -0.30 | 1.24E-01 |
| ZNF257         | 0.05  | 7.88E-01 | -0.30 | 1.24E-01 |
| AMTN           | 0.03  | 8.71E-01 | -0.30 | 1.24E-01 |
| C10orf62       | -0.08 | 6.79E-01 | -0.30 | 1.24E-01 |
| C4orf48        | 0.03  | 8.69E-01 | 0.30  | 1.24E-01 |
| CDK3           | -0.26 | 1.86E-01 | 0.30  | 1.24E-01 |
| EXOC3L2        | 0.20  | 3.09E-01 | 0.30  | 1.24E-01 |
| G26976         | 0.05  | 7.83E-01 | -0.30 | 1.24E-01 |
| LINC00184      | -0.11 | 5.64E-01 | -0.30 | 1.24E-01 |
| LINC00343      | -0.14 | 4.77E-01 | -0.30 | 1.24E-01 |
| MAST4-IT1      | 0.23  | 2.43E-01 | 0.30  | 1.24E-01 |
| MCEE           | 0.14  | 4.67E-01 | 0.30  | 1.24E-01 |
| NDUFV2-AS1     | 0.02  | 9.27E-01 | -0.30 | 1.24E-01 |
| ODF3L1         | -0.22 | 2.63E-01 | -0.30 | 1.24E-01 |
| RP11-129B9.2   | -0.14 | 4.83E-01 | 0.30  | 1.24E-01 |

|                  |       |          |       |          |
|------------------|-------|----------|-------|----------|
| RP11-31F15.2     | -0.17 | 3.84E-01 | -0.30 | 1.24E-01 |
| RP11-667K14.8    | -0.04 | 8.28E-01 | -0.30 | 1.24E-01 |
| TAF7L            | -0.10 | 6.27E-01 | -0.30 | 1.24E-01 |
| TMEM59L          | -0.40 | 3.67E-02 | -0.30 | 1.24E-01 |
| AC068831.3       | -0.24 | 2.17E-01 | -0.30 | 1.25E-01 |
| AP000265.1       | -0.44 | 1.89E-02 | -0.30 | 1.25E-01 |
| FOXN4            | -0.26 | 1.73E-01 | -0.30 | 1.25E-01 |
| G35720           | -0.34 | 7.61E-02 | 0.30  | 1.25E-01 |
| ISOC1            | 0.04  | 8.24E-01 | -0.30 | 1.25E-01 |
| MINK1            | 0.25  | 2.05E-01 | 0.30  | 1.25E-01 |
| NCF1B            | 0.16  | 4.08E-01 | 0.30  | 1.25E-01 |
| PDZK1            | -0.01 | 9.44E-01 | -0.30 | 1.25E-01 |
| PPP1R13B         | 0.14  | 4.87E-01 | 0.30  | 1.25E-01 |
| RP11-130L8.2     | -0.08 | 6.88E-01 | -0.30 | 1.25E-01 |
| RP11-254A24.2    | -0.03 | 8.65E-01 | 0.30  | 1.25E-01 |
| SIPA1L2          | 0.32  | 9.15E-02 | 0.30  | 1.25E-01 |
| SLC37A4          | 0.13  | 5.22E-01 | 0.30  | 1.25E-01 |
| SNHG10           | 0.30  | 1.20E-01 | -0.30 | 1.25E-01 |
| SOGA3            | 0.06  | 7.73E-01 | 0.30  | 1.25E-01 |
| ALG1L9P          | -0.38 | 4.85E-02 | -0.30 | 1.25E-01 |
| CNTNAP3          | -0.35 | 6.70E-02 | -0.30 | 1.25E-01 |
| RP1-63M2.5       | 0.04  | 8.38E-01 | -0.30 | 1.25E-01 |
| RPS20P10         | 0.13  | 4.98E-01 | -0.30 | 1.25E-01 |
| COMT             | 0.40  | 3.55E-02 | 0.30  | 1.25E-01 |
| CRHBP            | 0.09  | 6.57E-01 | 0.30  | 1.25E-01 |
| PDE2A            | -0.01 | 9.47E-01 | 0.30  | 1.25E-01 |
| SERPINA1         | 0.36  | 6.20E-02 | 0.30  | 1.25E-01 |
| UBE2CP3          | 0.13  | 5.24E-01 | 0.30  | 1.25E-01 |
| CAMK1D           | -0.01 | 9.64E-01 | 0.30  | 1.26E-01 |
| DHX15            | 0.04  | 8.46E-01 | -0.30 | 1.26E-01 |
| FBXO18           | -0.09 | 6.39E-01 | 0.30  | 1.26E-01 |
| FUT1             | 0.25  | 1.98E-01 | 0.30  | 1.26E-01 |
| GPATCH1          | -0.26 | 1.84E-01 | -0.30 | 1.26E-01 |
| .LOXNC01-237H1.7 | -0.01 | 9.76E-01 | -0.30 | 1.26E-01 |
| LPCAT3           | 0.33  | 8.90E-02 | 0.30  | 1.26E-01 |
| MSRB2            | 0.24  | 2.24E-01 | 0.30  | 1.26E-01 |
| NANOGP11         | 0.03  | 8.91E-01 | -0.30 | 1.26E-01 |
| NKAIN3           | 0.03  | 8.75E-01 | -0.30 | 1.26E-01 |
| OR5P2            | -0.27 | 1.68E-01 | -0.30 | 1.26E-01 |
| OSBPL9           | -0.23 | 2.29E-01 | -0.30 | 1.26E-01 |
| RIN3             | 0.09  | 6.45E-01 | 0.30  | 1.26E-01 |
| RN7SL851P        | -0.11 | 5.62E-01 | -0.30 | 1.26E-01 |
| RP11-449L23.2    | -0.21 | 2.77E-01 | -0.30 | 1.26E-01 |
| RP11-95H11.1     | -0.38 | 4.71E-02 | -0.30 | 1.26E-01 |
| SYMPK            | 0.01  | 9.50E-01 | 0.30  | 1.26E-01 |
| TRAV12-3         | 0.12  | 5.56E-01 | 0.30  | 1.26E-01 |
| AP2A2            | 0.05  | 7.87E-01 | 0.30  | 1.26E-01 |

|                |       |          |       |          |
|----------------|-------|----------|-------|----------|
| CD37           | 0.11  | 5.73E-01 | 0.30  | 1.26E-01 |
| GJD3           | 0.17  | 3.78E-01 | 0.30  | 1.26E-01 |
| IFNE           | 0.09  | 6.52E-01 | 0.30  | 1.26E-01 |
| NXPE3          | -0.09 | 6.64E-01 | 0.30  | 1.26E-01 |
| PRDM1          | 0.27  | 1.64E-01 | 0.30  | 1.26E-01 |
| RNU6-876P      | 0.12  | 5.31E-01 | 0.30  | 1.26E-01 |
| RP11-374F3.5   | 0.03  | 8.99E-01 | -0.30 | 1.26E-01 |
| RP11-646E18.4  | 0.05  | 7.99E-01 | 0.30  | 1.26E-01 |
| RP4-563E14.1   | 0.02  | 9.14E-01 | -0.30 | 1.26E-01 |
| RPL41P1        | -0.10 | 6.27E-01 | -0.30 | 1.26E-01 |
| TMCC2          | 0.00  | 9.93E-01 | -0.30 | 1.26E-01 |
| TOM1           | 0.22  | 2.71E-01 | 0.30  | 1.26E-01 |
| TRAPPC11       | 0.15  | 4.44E-01 | -0.30 | 1.26E-01 |
| TRBV20-1       | 0.05  | 7.84E-01 | 0.30  | 1.26E-01 |
| AP000783.1     | -0.40 | 3.36E-02 | 0.30  | 1.26E-01 |
| ARHGAP42       | -0.23 | 2.46E-01 | -0.30 | 1.26E-01 |
| CILP2          | -0.17 | 3.87E-01 | -0.30 | 1.26E-01 |
| FAM200A        | 0.07  | 7.32E-01 | 0.30  | 1.26E-01 |
| HLA-T          | -0.07 | 7.41E-01 | -0.30 | 1.26E-01 |
| RP11-21K12.3   | -0.08 | 6.95E-01 | 0.30  | 1.26E-01 |
| RP11-227G15.11 | -0.15 | 4.34E-01 | -0.30 | 1.26E-01 |
| RP11-77I22.2   | -0.01 | 9.67E-01 | -0.30 | 1.26E-01 |
| RP11-782C8.6   | -0.05 | 7.93E-01 | -0.30 | 1.26E-01 |
| RP4-541C22.5   | 0.08  | 6.79E-01 | -0.30 | 1.26E-01 |
| SNORD14A       | 0.23  | 2.34E-01 | -0.30 | 1.26E-01 |
| ZNF264         | 0.07  | 7.41E-01 | -0.30 | 1.26E-01 |
| ASTE1          | 0.15  | 4.38E-01 | -0.30 | 1.27E-01 |
| CALB1          | 0.36  | 6.33E-02 | -0.30 | 1.27E-01 |
| CDH6           | -0.24 | 2.24E-01 | 0.30  | 1.27E-01 |
| CICP3          | 0.07  | 7.17E-01 | 0.30  | 1.27E-01 |
| COASY          | 0.15  | 4.34E-01 | 0.30  | 1.27E-01 |
| G30338         | 0.22  | 2.71E-01 | 0.30  | 1.27E-01 |
| G6796          | -0.26 | 1.83E-01 | 0.30  | 1.27E-01 |
| HIST1H1T       | 0.04  | 8.24E-01 | 0.30  | 1.27E-01 |
| LINC01127      | 0.32  | 9.84E-02 | 0.30  | 1.27E-01 |
| PNMA3          | -0.23 | 2.37E-01 | 0.30  | 1.27E-01 |
| PRICKLE3       | 0.17  | 3.86E-01 | 0.30  | 1.27E-01 |
| RP11-687F6.4   | -0.02 | 9.13E-01 | 0.30  | 1.27E-01 |
| RPUSD3         | -0.11 | 5.80E-01 | 0.30  | 1.27E-01 |
| AC073415.2     | 0.24  | 2.27E-01 | 0.30  | 1.27E-01 |
| AC108142.1     | 0.28  | 1.48E-01 | 0.30  | 1.27E-01 |
| BEAN1-AS1      | -0.12 | 5.41E-01 | -0.30 | 1.27E-01 |
| CR392039.2     | 0.07  | 7.33E-01 | -0.30 | 1.27E-01 |
| CREB3L4        | -0.09 | 6.59E-01 | 0.30  | 1.27E-01 |
| DRP2           | -0.19 | 3.39E-01 | -0.30 | 1.27E-01 |
| F7             | 0.05  | 8.17E-01 | -0.30 | 1.27E-01 |
| LPAR1          | -0.26 | 1.90E-01 | -0.30 | 1.27E-01 |

|                      |       |          |       |          |
|----------------------|-------|----------|-------|----------|
| <b>MTCYBP3</b>       | 0.09  | 6.37E-01 | 0.30  | 1.27E-01 |
| <b>SERGEF</b>        | 0.04  | 8.57E-01 | 0.30  | 1.27E-01 |
| <b>ST6GAL1</b>       | 0.25  | 1.95E-01 | 0.30  | 1.27E-01 |
| <b>AGFG2</b>         | -0.29 | 1.39E-01 | -0.30 | 1.28E-01 |
| <b>C3orf84</b>       | -0.13 | 5.25E-01 | -0.30 | 1.28E-01 |
| <b>CACFD1</b>        | 0.20  | 3.11E-01 | 0.30  | 1.28E-01 |
| <b>CBLN1</b>         | -0.29 | 1.34E-01 | 0.30  | 1.28E-01 |
| <b>RFNG</b>          | -0.10 | 6.20E-01 | 0.30  | 1.28E-01 |
| <b>RP11-416L21.2</b> | -0.09 | 6.67E-01 | 0.30  | 1.28E-01 |
| <b>RP11-487I5.4</b>  | 0.59  | 9.91E-04 | 0.30  | 1.28E-01 |
| <b>RPL7AP15</b>      | -0.31 | 1.05E-01 | -0.30 | 1.28E-01 |
| <b>ADGRF4</b>        | -0.09 | 6.44E-01 | -0.30 | 1.28E-01 |
| <b>AMPD3</b>         | 0.41  | 2.82E-02 | 0.30  | 1.28E-01 |
| <b>ATP6V0A2</b>      | 0.15  | 4.49E-01 | -0.30 | 1.28E-01 |
| <b>C17orf99</b>      | 0.27  | 1.65E-01 | 0.30  | 1.28E-01 |
| <b>CDKL4</b>         | 0.05  | 8.09E-01 | -0.30 | 1.28E-01 |
| <b>COG5</b>          | -0.02 | 9.01E-01 | -0.30 | 1.28E-01 |
| <b>CTB-51E13.1</b>   | -0.11 | 5.82E-01 | -0.30 | 1.28E-01 |
| <b>LIMK2</b>         | 0.38  | 4.81E-02 | 0.30  | 1.28E-01 |
| <b>LRRC37A3</b>      | -0.05 | 7.83E-01 | -0.30 | 1.28E-01 |
| <b>LSMEM2</b>        | 0.19  | 3.44E-01 | -0.30 | 1.28E-01 |
| <b>METTL21EP</b>     | 0.04  | 8.44E-01 | -0.30 | 1.28E-01 |
| <b>NTNG1</b>         | 0.09  | 6.59E-01 | -0.30 | 1.28E-01 |
| <b>PDZK1IP1</b>      | 0.33  | 8.29E-02 | 0.30  | 1.28E-01 |
| <b>RAB13</b>         | -0.10 | 6.09E-01 | 0.30  | 1.28E-01 |
| <b>SCAF1</b>         | 0.35  | 6.98E-02 | 0.30  | 1.28E-01 |
| <b>TH2LCRR</b>       | 0.16  | 4.20E-01 | -0.30 | 1.28E-01 |
| <b>COX4I2</b>        | 0.18  | 3.52E-01 | 0.30  | 1.29E-01 |
| <b>CTD-2630F21.1</b> | 0.10  | 6.17E-01 | -0.30 | 1.29E-01 |
| <b>DDX41</b>         | 0.12  | 5.40E-01 | 0.30  | 1.29E-01 |
| <b>DLG3</b>          | 0.37  | 4.99E-02 | 0.30  | 1.29E-01 |
| <b>FRG2HP</b>        | -0.06 | 7.55E-01 | -0.30 | 1.29E-01 |
| <b>GCSHP5</b>        | 0.04  | 8.24E-01 | 0.30  | 1.29E-01 |
| <b>GRHL2</b>         | 0.29  | 1.31E-01 | 0.30  | 1.29E-01 |
| <b>RP11-615I2.2</b>  | -0.43 | 2.23E-02 | 0.30  | 1.29E-01 |
| <b>RP4-773N10.4</b>  | 0.20  | 3.13E-01 | 0.30  | 1.29E-01 |
| <b>SNORA24</b>       | 0.21  | 2.76E-01 | 0.30  | 1.29E-01 |
| <b>TMED11P</b>       | -0.01 | 9.74E-01 | -0.30 | 1.29E-01 |
| <b>XLOC_006644</b>   | 0.11  | 5.90E-01 | 0.30  | 1.29E-01 |
| <b>AC019117.1</b>    | 0.12  | 5.32E-01 | -0.30 | 1.29E-01 |
| <b>ACVR1</b>         | 0.18  | 3.72E-01 | 0.30  | 1.29E-01 |
| <b>LAMB2</b>         | -0.06 | 7.43E-01 | 0.30  | 1.29E-01 |
| <b>LINC01291</b>     | -0.01 | 9.75E-01 | 0.30  | 1.29E-01 |
| <b>LIPE-AS1</b>      | 0.34  | 7.54E-02 | 0.30  | 1.29E-01 |
| <b>RP11-212D19.4</b> | 0.13  | 5.16E-01 | 0.30  | 1.29E-01 |
| <b>RP11-390K5.3</b>  | 0.07  | 7.25E-01 | 0.30  | 1.29E-01 |
| <b>SOX13</b>         | -0.44 | 1.82E-02 | 0.30  | 1.29E-01 |

|               |       |          |       |          |
|---------------|-------|----------|-------|----------|
| TMEM43        | -0.24 | 2.23E-01 | -0.30 | 1.29E-01 |
| TPSD1         | 0.20  | 3.01E-01 | 0.30  | 1.29E-01 |
| TRIM55        | -0.22 | 2.51E-01 | -0.30 | 1.29E-01 |
| AIM1          | 0.27  | 1.61E-01 | 0.30  | 1.29E-01 |
| ATP6V0C       | 0.15  | 4.32E-01 | -0.30 | 1.29E-01 |
| FMN2          | -0.15 | 4.49E-01 | -0.30 | 1.29E-01 |
| PDE8B         | -0.18 | 3.61E-01 | -0.30 | 1.29E-01 |
| RP11-389G6.4  | 0.16  | 4.30E-01 | -0.30 | 1.29E-01 |
| RP11-661G16.1 | 0.10  | 6.21E-01 | 0.30  | 1.29E-01 |
| RPAP3         | 0.00  | 9.85E-01 | -0.30 | 1.29E-01 |
| SLC9C1        | -0.05 | 7.86E-01 | -0.30 | 1.29E-01 |
| SMG5          | 0.22  | 2.58E-01 | 0.30  | 1.29E-01 |
| WDR53         | 0.29  | 1.36E-01 | 0.30  | 1.29E-01 |
| WFIKKN2       | -0.11 | 5.78E-01 | -0.30 | 1.29E-01 |
| ABHD6         | -0.22 | 2.71E-01 | -0.30 | 1.30E-01 |
| AC067945.3    | 0.19  | 3.29E-01 | -0.30 | 1.30E-01 |
| AMD1P3        | -0.12 | 5.52E-01 | 0.30  | 1.30E-01 |
| DCUN1D4       | -0.01 | 9.58E-01 | -0.30 | 1.30E-01 |
| EN2           | -0.03 | 8.98E-01 | 0.30  | 1.30E-01 |
| GLI1          | -0.13 | 5.13E-01 | -0.30 | 1.30E-01 |
| HK3           | 0.05  | 8.10E-01 | 0.30  | 1.30E-01 |
| HTR6          | -0.04 | 8.26E-01 | -0.30 | 1.30E-01 |
| KRT8P48       | 0.05  | 7.89E-01 | 0.30  | 1.30E-01 |
| LY86          | -0.02 | 9.20E-01 | 0.30  | 1.30E-01 |
| PHF10         | -0.03 | 8.95E-01 | -0.30 | 1.30E-01 |
| RP11-167H9.5  | -0.11 | 5.67E-01 | -0.30 | 1.30E-01 |
| SELP          | -0.07 | 7.23E-01 | 0.30  | 1.30E-01 |
| ABCD1         | 0.09  | 6.58E-01 | 0.30  | 1.30E-01 |
| ADAMTSL3      | -0.13 | 5.17E-01 | -0.30 | 1.30E-01 |
| ATP10D        | 0.07  | 7.22E-01 | 0.30  | 1.30E-01 |
| GDPGP1        | 0.31  | 1.12E-01 | 0.30  | 1.30E-01 |
| MAPK7         | 0.04  | 8.50E-01 | 0.30  | 1.30E-01 |
| MIR199A1      | -0.20 | 3.11E-01 | -0.30 | 1.30E-01 |
| RAPGEF2       | -0.16 | 4.30E-01 | -0.30 | 1.30E-01 |
| RPL3P1        | -0.15 | 4.38E-01 | 0.30  | 1.30E-01 |
| WDR55         | 0.12  | 5.50E-01 | 0.30  | 1.30E-01 |
| AC002366.3    | -0.09 | 6.52E-01 | 0.30  | 1.31E-01 |
| C8orf37       | 0.20  | 3.16E-01 | -0.30 | 1.31E-01 |
| CDC42P4       | 0.27  | 1.65E-01 | -0.30 | 1.31E-01 |
| FGFBP2        | 0.17  | 3.83E-01 | -0.30 | 1.31E-01 |
| G33207        | -0.24 | 2.28E-01 | -0.30 | 1.31E-01 |
| GPALPP1       | 0.04  | 8.26E-01 | -0.30 | 1.31E-01 |
| PKHD1L1       | -0.14 | 4.63E-01 | 0.30  | 1.31E-01 |
| RNU6-678P     | -0.05 | 7.88E-01 | -0.30 | 1.31E-01 |
| RP11-266L9.5  | -0.14 | 4.81E-01 | -0.30 | 1.31E-01 |
| RP11-284M14.1 | -0.02 | 9.06E-01 | 0.30  | 1.31E-01 |
| RP11-534C12.1 | 0.10  | 6.21E-01 | -0.30 | 1.31E-01 |



|                |       |          |       |          |
|----------------|-------|----------|-------|----------|
| RP11-560A15.6  | -0.20 | 3.04E-01 | -0.30 | 1.31E-01 |
| TAL1           | 0.27  | 1.72E-01 | 0.30  | 1.31E-01 |
| TRAV9-2        | -0.04 | 8.24E-01 | 0.30  | 1.31E-01 |
| AC006445.7     | -0.16 | 4.26E-01 | -0.30 | 1.31E-01 |
| AC072052.7     | -0.09 | 6.54E-01 | -0.30 | 1.31E-01 |
| ANPEP          | -0.15 | 4.49E-01 | 0.30  | 1.31E-01 |
| C14orf132      | -0.43 | 2.13E-02 | -0.30 | 1.31E-01 |
| CTD-2104P17.1  | 0.12  | 5.42E-01 | -0.30 | 1.31E-01 |
| FMO2           | 0.04  | 8.24E-01 | 0.30  | 1.31E-01 |
| G18244         | -0.15 | 4.44E-01 | 0.30  | 1.31E-01 |
| G24769         | -0.22 | 2.68E-01 | -0.30 | 1.31E-01 |
| GANC           | -0.16 | 4.30E-01 | 0.30  | 1.31E-01 |
| GUCY1B2        | -0.37 | 4.98E-02 | -0.30 | 1.31E-01 |
| MLK7-AS1       | -0.23 | 2.35E-01 | -0.30 | 1.31E-01 |
| OR2AE1         | -0.02 | 9.00E-01 | -0.30 | 1.31E-01 |
| RP11-285A1.1   | -0.02 | 9.17E-01 | 0.30  | 1.31E-01 |
| RP11-497H16.6  | -0.08 | 6.97E-01 | 0.30  | 1.31E-01 |
| RP5-862P8.2    | -0.05 | 8.05E-01 | -0.30 | 1.31E-01 |
| RPS26P3        | 0.16  | 4.12E-01 | 0.30  | 1.31E-01 |
| SEC14L2        | 0.32  | 9.18E-02 | 0.30  | 1.31E-01 |
| TATDN2P3       | -0.18 | 3.66E-01 | -0.30 | 1.31E-01 |
| FMOD           | -0.16 | 4.21E-01 | 0.30  | 1.31E-01 |
| HSD17B2        | 0.46  | 1.47E-02 | 0.30  | 1.31E-01 |
| MIR3659        | 0.23  | 2.40E-01 | -0.30 | 1.31E-01 |
| MPZL2          | 0.31  | 1.03E-01 | 0.30  | 1.31E-01 |
| PARP3          | 0.17  | 3.83E-01 | 0.30  | 1.31E-01 |
| PDE1B          | 0.10  | 6.30E-01 | -0.30 | 1.31E-01 |
| PNLDC1         | 0.01  | 9.60E-01 | -0.30 | 1.31E-01 |
| RP1-197B17.5   | 0.00  | 9.80E-01 | -0.30 | 1.31E-01 |
| RP11-977G19.12 | -0.07 | 7.31E-01 | -0.30 | 1.31E-01 |
| RP5-1120P11.1  | 0.27  | 1.64E-01 | 0.30  | 1.31E-01 |
| SERINC2        | 0.28  | 1.45E-01 | 0.30  | 1.31E-01 |
| SNORD116-1     | 0.19  | 3.40E-01 | -0.30 | 1.31E-01 |
| SPATA9         | -0.03 | 8.67E-01 | -0.30 | 1.31E-01 |
| WNT7B          | -0.32 | 9.62E-02 | -0.30 | 1.31E-01 |
| BMPR1B         | -0.40 | 3.32E-02 | -0.30 | 1.32E-01 |
| BNIP3P10       | 0.10  | 6.24E-01 | -0.30 | 1.32E-01 |
| CDK12          | 0.14  | 4.88E-01 | -0.30 | 1.32E-01 |
| G30917         | 0.18  | 3.67E-01 | -0.30 | 1.32E-01 |
| HK2            | 0.12  | 5.40E-01 | 0.30  | 1.32E-01 |
| IL17RB         | 0.13  | 4.97E-01 | 0.30  | 1.32E-01 |
| IL22           | 0.07  | 7.22E-01 | 0.30  | 1.32E-01 |
| MTCO3P2        | -0.42 | 2.53E-02 | 0.30  | 1.32E-01 |
| PLEKHG7        | 0.28  | 1.48E-01 | 0.30  | 1.32E-01 |
| RNF26          | 0.47  | 1.16E-02 | 0.30  | 1.32E-01 |
| RP1-40E16.12   | 0.10  | 6.17E-01 | -0.30 | 1.32E-01 |
| XLOC_011075    | -0.09 | 6.38E-01 | -0.30 | 1.32E-01 |

|               |       |          |       |          |
|---------------|-------|----------|-------|----------|
| Z98881.1      | -0.13 | 5.02E-01 | -0.30 | 1.32E-01 |
| ZNF43         | 0.06  | 7.62E-01 | -0.30 | 1.32E-01 |
| AC004471.10   | -0.22 | 2.66E-01 | 0.30  | 1.32E-01 |
| ANAPC10       | 0.11  | 5.83E-01 | -0.30 | 1.32E-01 |
| ANKRD20A9P    | -0.30 | 1.15E-01 | -0.30 | 1.32E-01 |
| C1orf95       | -0.29 | 1.33E-01 | -0.30 | 1.32E-01 |
| CCDC9         | 0.09  | 6.59E-01 | 0.30  | 1.32E-01 |
| CDC14A        | -0.07 | 7.28E-01 | -0.30 | 1.32E-01 |
| DDX11L8       | -0.12 | 5.45E-01 | -0.30 | 1.32E-01 |
| DHRS3         | 0.03  | 8.94E-01 | 0.30  | 1.32E-01 |
| DMWD          | -0.15 | 4.54E-01 | 0.30  | 1.32E-01 |
| G32346        | 0.25  | 1.95E-01 | -0.30 | 1.32E-01 |
| KLK12         | -0.06 | 7.59E-01 | -0.30 | 1.32E-01 |
| PTX3          | 0.23  | 2.46E-01 | -0.30 | 1.32E-01 |
| RN7SL532P     | -0.07 | 7.09E-01 | -0.30 | 1.32E-01 |
| RP11-230L22.4 | 0.01  | 9.50E-01 | -0.30 | 1.32E-01 |
| RP11-483P21.6 | -0.05 | 8.14E-01 | -0.30 | 1.32E-01 |
| SIM2          | -0.14 | 4.62E-01 | -0.30 | 1.32E-01 |
| AC139099.4    | -0.33 | 8.34E-02 | 0.30  | 1.33E-01 |
| COQ9          | 0.29  | 1.38E-01 | 0.30  | 1.33E-01 |
| GAMT          | 0.06  | 7.67E-01 | 0.30  | 1.33E-01 |
| PLEKHA8P1     | 0.10  | 6.00E-01 | 0.30  | 1.33E-01 |
| TLR5          | 0.19  | 3.20E-01 | 0.30  | 1.33E-01 |
| LRRC19        | -0.14 | 4.70E-01 | -0.30 | 1.33E-01 |
| RP11-488L18.4 | -0.03 | 8.93E-01 | -0.30 | 1.33E-01 |
| CACNB2        | -0.08 | 6.76E-01 | -0.30 | 1.33E-01 |
| CDH19         | -0.33 | 8.98E-02 | -0.30 | 1.33E-01 |
| CTD-2291D10.4 | -0.28 | 1.50E-01 | -0.30 | 1.33E-01 |
| CTD-2626G11.2 | -0.01 | 9.72E-01 | -0.30 | 1.33E-01 |
| G35086        | -0.22 | 2.68E-01 | 0.30  | 1.33E-01 |
| HEPHL1        | 0.25  | 1.92E-01 | 0.30  | 1.33E-01 |
| PCDHGA11      | -0.28 | 1.50E-01 | -0.30 | 1.33E-01 |
| PRKX          | -0.42 | 2.74E-02 | -0.30 | 1.33E-01 |
| RIMBP2        | 0.08  | 6.88E-01 | 0.30  | 1.33E-01 |
| RP11-12A2.1   | -0.10 | 6.31E-01 | 0.30  | 1.33E-01 |
| RP11-333I13.1 | -0.33 | 8.37E-02 | -0.30 | 1.33E-01 |
| RP11-497H16.9 | -0.09 | 6.32E-01 | 0.30  | 1.33E-01 |
| RP11-507J18.2 | 0.17  | 3.93E-01 | 0.30  | 1.33E-01 |
| RP11-65N13.6  | 0.01  | 9.78E-01 | -0.30 | 1.33E-01 |
| RP4-799D16.1  | 0.26  | 1.87E-01 | 0.30  | 1.33E-01 |
| TCEAL2        | -0.06 | 7.76E-01 | -0.30 | 1.33E-01 |
| ALAD          | -0.09 | 6.40E-01 | 0.30  | 1.33E-01 |
| C16orf62      | 0.20  | 2.96E-01 | 0.30  | 1.33E-01 |
| DOCK2         | 0.23  | 2.29E-01 | 0.30  | 1.33E-01 |
| EEF1A1P9      | 0.28  | 1.54E-01 | 0.30  | 1.33E-01 |
| FOXP3         | 0.07  | 7.41E-01 | 0.30  | 1.33E-01 |
| FZD10-AS1     | 0.13  | 4.95E-01 | 0.30  | 1.33E-01 |

|                |       |          |       |          |
|----------------|-------|----------|-------|----------|
| NCKAP1L        | 0.10  | 6.29E-01 | 0.30  | 1.33E-01 |
| RP3-495K2.3    | -0.34 | 7.46E-02 | -0.30 | 1.33E-01 |
| RP4-613A2.1    | -0.13 | 5.03E-01 | -0.30 | 1.33E-01 |
| SNX18          | 0.04  | 8.38E-01 | -0.30 | 1.33E-01 |
| TMEM56-RWDD3   | 0.01  | 9.57E-01 | -0.30 | 1.33E-01 |
| TRIM21         | 0.32  | 1.02E-01 | 0.30  | 1.33E-01 |
| VKORC1L1       | -0.25 | 2.08E-01 | -0.30 | 1.33E-01 |
| XPO4           | 0.04  | 8.42E-01 | -0.30 | 1.33E-01 |
| AGTRAP         | 0.37  | 5.33E-02 | 0.30  | 1.34E-01 |
| AP001059.6     | -0.30 | 1.25E-01 | -0.30 | 1.34E-01 |
| CD40LG         | 0.08  | 6.77E-01 | 0.30  | 1.34E-01 |
| CTD-2012J19.2  | 0.05  | 7.89E-01 | 0.30  | 1.34E-01 |
| KLRK1          | 0.26  | 1.79E-01 | -0.30 | 1.34E-01 |
| MTCO1P29       | 0.16  | 4.25E-01 | -0.30 | 1.34E-01 |
| MVB12B         | 0.44  | 2.07E-02 | 0.30  | 1.34E-01 |
| PAQR5          | 0.01  | 9.48E-01 | 0.30  | 1.34E-01 |
| RGAG4          | -0.57 | 1.64E-03 | -0.30 | 1.34E-01 |
| RN7SKP287      | -0.07 | 7.25E-01 | 0.30  | 1.34E-01 |
| RP11-33B1.3    | -0.06 | 7.52E-01 | -0.30 | 1.34E-01 |
| RP11-399B17.1  | -0.49 | 7.44E-03 | -0.30 | 1.34E-01 |
| RP11-428C19.4  | -0.28 | 1.56E-01 | -0.30 | 1.34E-01 |
| TRIM65         | 0.15  | 4.31E-01 | 0.30  | 1.34E-01 |
| ALDH1A2        | -0.14 | 4.79E-01 | -0.30 | 1.34E-01 |
| CHURC1         | -0.04 | 8.53E-01 | 0.30  | 1.34E-01 |
| CTB-33G10.1    | 0.22  | 2.63E-01 | -0.30 | 1.34E-01 |
| EXOC7          | 0.35  | 6.48E-02 | 0.30  | 1.34E-01 |
| FOXD4          | -0.18 | 3.68E-01 | -0.30 | 1.34E-01 |
| G16357         | -0.03 | 8.95E-01 | 0.30  | 1.34E-01 |
| G3016          | 0.23  | 2.37E-01 | 0.30  | 1.34E-01 |
| LAIR1          | 0.09  | 6.46E-01 | 0.30  | 1.34E-01 |
| LIPK           | 0.00  | 9.80E-01 | -0.30 | 1.34E-01 |
| RP11-148B18.4  | -0.07 | 7.05E-01 | -0.30 | 1.34E-01 |
| RPS12P31       | -0.11 | 5.71E-01 | 0.30  | 1.34E-01 |
| SERHL          | -0.01 | 9.76E-01 | -0.30 | 1.34E-01 |
| SYK            | 0.27  | 1.61E-01 | 0.30  | 1.34E-01 |
| TP63           | 0.42  | 2.80E-02 | 0.30  | 1.34E-01 |
| TRAK2          | -0.37 | 5.54E-02 | -0.30 | 1.34E-01 |
| TRIM24         | 0.08  | 6.77E-01 | -0.30 | 1.34E-01 |
| AL354718.1     | 0.16  | 4.12E-01 | -0.30 | 1.35E-01 |
| ALS2CR11       | -0.27 | 1.64E-01 | -0.30 | 1.35E-01 |
| C12orf77       | 0.11  | 5.92E-01 | -0.30 | 1.35E-01 |
| CRYM-AS1       | -0.38 | 4.49E-02 | -0.30 | 1.35E-01 |
| CTB-133G6.2    | -0.10 | 6.16E-01 | 0.30  | 1.35E-01 |
| CTD-2553L13.10 | 0.01  | 9.66E-01 | -0.30 | 1.35E-01 |
| DDX43P1        | -0.34 | 7.92E-02 | -0.30 | 1.35E-01 |
| G2112          | 0.07  | 7.14E-01 | 0.30  | 1.35E-01 |
| G32422         | -0.09 | 6.48E-01 | -0.30 | 1.35E-01 |

|               |       |          |       |          |
|---------------|-------|----------|-------|----------|
| GPR15         | 0.23  | 2.47E-01 | -0.30 | 1.35E-01 |
| HLA-K         | -0.24 | 2.11E-01 | -0.30 | 1.35E-01 |
| MUTYH         | 0.03  | 8.69E-01 | 0.30  | 1.35E-01 |
| PP2D1         | 0.24  | 2.23E-01 | -0.30 | 1.35E-01 |
| RHEB          | 0.02  | 9.05E-01 | -0.30 | 1.35E-01 |
| RP11-529E10.6 | -0.24 | 2.12E-01 | 0.30  | 1.35E-01 |
| RP11-545P7.9  | 0.04  | 8.33E-01 | 0.30  | 1.35E-01 |
| RP4-603I14.3  | -0.28 | 1.49E-01 | 0.30  | 1.35E-01 |
| RP4-794I6.4   | 0.28  | 1.55E-01 | 0.30  | 1.35E-01 |
| S100A7        | 0.14  | 4.74E-01 | 0.30  | 1.35E-01 |
| SEMA3B        | -0.07 | 7.29E-01 | -0.30 | 1.35E-01 |
| ZDHHC17       | -0.23 | 2.45E-01 | -0.30 | 1.35E-01 |
| AC007880.1    | 0.01  | 9.75E-01 | -0.30 | 1.35E-01 |
| CPSF6         | 0.39  | 4.23E-02 | -0.30 | 1.35E-01 |
| FYN           | -0.18 | 3.69E-01 | -0.30 | 1.35E-01 |
| HIF1AP1       | -0.13 | 4.95E-01 | -0.30 | 1.35E-01 |
| MAP2K6        | 0.21  | 2.90E-01 | 0.30  | 1.35E-01 |
| 6-Mar         | -0.08 | 6.72E-01 | -0.30 | 1.35E-01 |
| PLD4          | -0.10 | 6.10E-01 | -0.30 | 1.35E-01 |
| RN7SL3        | 0.24  | 2.28E-01 | 0.30  | 1.35E-01 |
| RP11-651K21.1 | 0.10  | 6.27E-01 | -0.30 | 1.35E-01 |
| RP11-670E13.6 | 0.00  | 9.99E-01 | 0.30  | 1.35E-01 |
| RP11-740D6.3  | 0.11  | 5.69E-01 | -0.30 | 1.35E-01 |
| SPATA22       | -0.18 | 3.52E-01 | -0.30 | 1.35E-01 |
| TRBC2         | 0.19  | 3.24E-01 | 0.30  | 1.35E-01 |
| XIST          | -0.54 | 3.02E-03 | -0.30 | 1.35E-01 |
| XLOC_013174   | 0.14  | 4.74E-01 | -0.30 | 1.35E-01 |
| ZNF674-AS1    | 0.16  | 4.16E-01 | -0.30 | 1.35E-01 |
| DNAJB5        | 0.23  | 2.34E-01 | 0.29  | 1.36E-01 |
| ESAM          | -0.01 | 9.75E-01 | 0.29  | 1.36E-01 |
| MXD1          | 0.24  | 2.28E-01 | 0.29  | 1.36E-01 |
| RNA5SP151     | -0.05 | 8.13E-01 | -0.29 | 1.36E-01 |
| RP11-108K3.1  | 0.23  | 2.41E-01 | 0.29  | 1.36E-01 |
| RP11-430L17.1 | -0.01 | 9.43E-01 | -0.29 | 1.36E-01 |
| ZNF677        | -0.12 | 5.59E-01 | -0.29 | 1.36E-01 |
| AC002044.3    | -0.17 | 3.77E-01 | -0.29 | 1.36E-01 |
| CTD-2215E18.2 | -0.16 | 4.18E-01 | -0.29 | 1.36E-01 |
| CTD-3096P4.1  | -0.45 | 1.69E-02 | -0.29 | 1.36E-01 |
| FDX1          | 0.02  | 9.08E-01 | -0.29 | 1.36E-01 |
| G26596        | -0.04 | 8.59E-01 | -0.29 | 1.36E-01 |
| IPMK          | 0.16  | 4.19E-01 | -0.29 | 1.36E-01 |
| KCTD9P2       | -0.05 | 7.94E-01 | 0.29  | 1.36E-01 |
| LINC00664     | -0.09 | 6.33E-01 | -0.29 | 1.36E-01 |
| LINC01315     | -0.21 | 2.73E-01 | -0.29 | 1.36E-01 |
| PRKAR2B       | -0.19 | 3.34E-01 | -0.29 | 1.36E-01 |
| RNU6-584P     | 0.03  | 8.80E-01 | 0.29  | 1.36E-01 |
| RP11-158H5.7  | -0.02 | 9.24E-01 | 0.29  | 1.36E-01 |

|                  |       |          |       |          |
|------------------|-------|----------|-------|----------|
| RP11-748H22.1    | 0.01  | 9.74E-01 | 0.29  | 1.36E-01 |
| STAU2-AS1        | -0.24 | 2.23E-01 | -0.29 | 1.36E-01 |
| TLL1             | -0.33 | 8.16E-02 | 0.29  | 1.36E-01 |
| ZNF230           | 0.15  | 4.53E-01 | -0.29 | 1.36E-01 |
| ALG1L7P          | -0.01 | 9.68E-01 | -0.29 | 1.36E-01 |
| C3orf49          | 0.32  | 9.18E-02 | -0.29 | 1.36E-01 |
| CH507-9B2.8      | 0.13  | 4.95E-01 | 0.29  | 1.36E-01 |
| CHST2            | 0.23  | 2.45E-01 | -0.29 | 1.36E-01 |
| CTD-2313J17.7    | 0.08  | 6.78E-01 | -0.29 | 1.36E-01 |
| HAO2             | 0.15  | 4.48E-01 | -0.29 | 1.36E-01 |
| LCA5             | 0.05  | 8.15E-01 | -0.29 | 1.36E-01 |
| MPTX1            | -0.13 | 5.19E-01 | -0.29 | 1.36E-01 |
| MSI1             | -0.06 | 7.72E-01 | -0.29 | 1.36E-01 |
| POU3F1           | 0.17  | 3.88E-01 | 0.29  | 1.36E-01 |
| REN              | 0.40  | 3.45E-02 | 0.29  | 1.36E-01 |
| RNU6-388P        | 0.31  | 1.06E-01 | -0.29 | 1.36E-01 |
| RP11-70D24.4     | 0.05  | 8.05E-01 | -0.29 | 1.36E-01 |
| SLC22A8          | -0.12 | 5.53E-01 | 0.29  | 1.36E-01 |
| TIGD6            | 0.32  | 9.18E-02 | 0.29  | 1.36E-01 |
| KXbac-B444P24.1C | -0.03 | 8.73E-01 | -0.29 | 1.36E-01 |
| AC073069.2       | -0.19 | 3.26E-01 | -0.29 | 1.37E-01 |
| BAG3             | 0.25  | 2.04E-01 | 0.29  | 1.37E-01 |
| CCDC162P         | 0.15  | 4.38E-01 | -0.29 | 1.37E-01 |
| CCDC62           | -0.23 | 2.32E-01 | -0.29 | 1.37E-01 |
| CHRND            | -0.28 | 1.42E-01 | -0.29 | 1.37E-01 |
| CTSL             | 0.25  | 2.02E-01 | 0.29  | 1.37E-01 |
| DHRS4-AS1        | 0.04  | 8.54E-01 | 0.29  | 1.37E-01 |
| FAM83B           | 0.04  | 8.58E-01 | 0.29  | 1.37E-01 |
| GAPT             | 0.07  | 7.24E-01 | -0.29 | 1.37E-01 |
| MFSD8            | 0.10  | 6.05E-01 | -0.29 | 1.37E-01 |
| MIR1256          | -0.18 | 3.55E-01 | -0.29 | 1.37E-01 |
| RP11-150O12.6    | 0.05  | 7.87E-01 | 0.29  | 1.37E-01 |
| RP11-526I2.1     | -0.44 | 1.84E-02 | 0.29  | 1.37E-01 |
| RP11-5G9.6       | -0.06 | 7.54E-01 | -0.29 | 1.37E-01 |
| RSPH9            | -0.24 | 2.17E-01 | -0.29 | 1.37E-01 |
| TRPC1            | -0.09 | 6.32E-01 | -0.29 | 1.37E-01 |
| ZDHHC1           | -0.14 | 4.63E-01 | -0.29 | 1.37E-01 |
| ABCF3            | 0.20  | 2.97E-01 | 0.29  | 1.37E-01 |
| AF001548.6       | -0.01 | 9.66E-01 | 0.29  | 1.37E-01 |
| ASIC4            | -0.17 | 3.77E-01 | -0.29 | 1.37E-01 |
| BCORP1           | 0.38  | 4.52E-02 | 0.29  | 1.37E-01 |
| CPB2-AS1         | 0.00  | 9.96E-01 | -0.29 | 1.37E-01 |
| CR848007.2       | -0.61 | 6.20E-04 | -0.29 | 1.37E-01 |
| DIO2             | 0.34  | 7.27E-02 | 0.29  | 1.37E-01 |
| RP11-1099M24.9   | -0.01 | 9.67E-01 | -0.29 | 1.37E-01 |
| RP11-236L14.2    | 0.15  | 4.51E-01 | -0.29 | 1.37E-01 |
| RP11-51F16.1     | -0.26 | 1.73E-01 | 0.29  | 1.37E-01 |

|                       |       |          |       |          |
|-----------------------|-------|----------|-------|----------|
| <b>RP11-616M22.12</b> | 0.01  | 9.48E-01 | -0.29 | 1.37E-01 |
| <b>RPL23AP53</b>      | -0.01 | 9.42E-01 | -0.29 | 1.37E-01 |
| <b>TIGAR</b>          | 0.11  | 5.64E-01 | 0.29  | 1.37E-01 |
| <b>TMEM150B</b>       | 0.00  | 9.99E-01 | 0.29  | 1.37E-01 |
| <b>ZNF839P1</b>       | 0.37  | 5.20E-02 | 0.29  | 1.37E-01 |
| <b>AC114808.2</b>     | -0.03 | 8.68E-01 | -0.29 | 1.38E-01 |
| <b>CHN1</b>           | 0.10  | 6.06E-01 | 0.29  | 1.38E-01 |
| <b>DRAIC</b>          | -0.14 | 4.81E-01 | 0.29  | 1.38E-01 |
| <b>G41369</b>         | -0.22 | 2.62E-01 | -0.29 | 1.38E-01 |
| <b>GIMAP4</b>         | 0.04  | 8.57E-01 | 0.29  | 1.38E-01 |
| <b>GTF3AP2</b>        | 0.05  | 8.08E-01 | -0.29 | 1.38E-01 |
| <b>ICAM1</b>          | 0.19  | 3.32E-01 | 0.29  | 1.38E-01 |
| <b>IFIH1</b>          | 0.28  | 1.53E-01 | 0.29  | 1.38E-01 |
| <b>KB-1396H2.2</b>    | 0.22  | 2.68E-01 | 0.29  | 1.38E-01 |
| <b>NACAD</b>          | -0.05 | 7.98E-01 | -0.29 | 1.38E-01 |
| <b>NRAP</b>           | 0.32  | 1.02E-01 | 0.29  | 1.38E-01 |
| <b>RP1-197B17.3</b>   | 0.09  | 6.33E-01 | -0.29 | 1.38E-01 |
| <b>RP11-527N22.2</b>  | 0.19  | 3.21E-01 | 0.29  | 1.38E-01 |
| <b>RP11-582E3.4</b>   | -0.34 | 8.00E-02 | -0.29 | 1.38E-01 |
| <b>SLC35E3</b>        | 0.15  | 4.50E-01 | 0.29  | 1.38E-01 |
| <b>TMEM259</b>        | 0.14  | 4.88E-01 | 0.29  | 1.38E-01 |
| <b>ZNRF3-IT1</b>      | -0.15 | 4.42E-01 | -0.29 | 1.38E-01 |
| <b>BCAR3</b>          | -0.26 | 1.73E-01 | -0.29 | 1.38E-01 |
| <b>CTAGE6</b>         | 0.25  | 2.08E-01 | -0.29 | 1.38E-01 |
| <b>FAM69A</b>         | -0.05 | 7.96E-01 | 0.29  | 1.38E-01 |
| <b>G16985</b>         | -0.22 | 2.62E-01 | -0.29 | 1.38E-01 |
| <b>OSGIN1</b>         | -0.11 | 5.70E-01 | -0.29 | 1.38E-01 |
| <b>OTULIN</b>         | -0.01 | 9.49E-01 | 0.29  | 1.38E-01 |
| <b>RP1L1</b>          | -0.10 | 6.04E-01 | -0.29 | 1.38E-01 |
| <b>SLC1A4</b>         | -0.13 | 5.09E-01 | -0.29 | 1.38E-01 |
| <b>TMCC1</b>          | 0.30  | 1.16E-01 | 0.29  | 1.38E-01 |
| <b>XAF1</b>           | 0.35  | 7.03E-02 | 0.29  | 1.38E-01 |
| <b>ADAR</b>           | 0.33  | 9.04E-02 | 0.29  | 1.39E-01 |
| <b>CENPC</b>          | -0.16 | 4.12E-01 | -0.29 | 1.39E-01 |
| <b>CNTN1</b>          | -0.21 | 2.86E-01 | -0.29 | 1.39E-01 |
| <b>COL9A3</b>         | -0.08 | 6.98E-01 | 0.29  | 1.39E-01 |
| <b>PDIA3P1</b>        | -0.19 | 3.37E-01 | -0.29 | 1.39E-01 |
| <b>PLA2G16</b>        | -0.08 | 6.85E-01 | -0.29 | 1.39E-01 |
| <b>RP11-160H12.2</b>  | -0.21 | 2.93E-01 | -0.29 | 1.39E-01 |
| <b>RP11-392P7.7</b>   | -0.11 | 5.74E-01 | -0.29 | 1.39E-01 |
| <b>RP11-74E22.3</b>   | 0.31  | 1.04E-01 | 0.29  | 1.39E-01 |
| <b>SNURF</b>          | 0.22  | 2.69E-01 | -0.29 | 1.39E-01 |
| <b>TEF</b>            | -0.15 | 4.42E-01 | -0.29 | 1.39E-01 |
| <b>AP000695.6</b>     | -0.16 | 4.30E-01 | 0.29  | 1.39E-01 |
| <b>FAM166B</b>        | 0.03  | 8.73E-01 | -0.29 | 1.39E-01 |
| <b>MEN1</b>           | -0.08 | 7.00E-01 | 0.29  | 1.39E-01 |
| <b>MFSD4</b>          | -0.24 | 2.24E-01 | -0.29 | 1.39E-01 |

|               |       |          |       |          |
|---------------|-------|----------|-------|----------|
| NFKBIL1       | 0.14  | 4.86E-01 | 0.29  | 1.39E-01 |
| PTGER1        | -0.04 | 8.42E-01 | -0.29 | 1.39E-01 |
| RNU6-915P     | -0.16 | 4.29E-01 | -0.29 | 1.39E-01 |
| RP11-269F19.2 | -0.04 | 8.27E-01 | 0.29  | 1.39E-01 |
| RP11-325E14.5 | 0.00  | 9.98E-01 | -0.29 | 1.39E-01 |
| RP3-340B19.2  | 0.23  | 2.47E-01 | 0.29  | 1.39E-01 |
| RP3-340N1.2   | 0.03  | 8.65E-01 | -0.29 | 1.39E-01 |
| RP3-453C12.14 | -0.04 | 8.48E-01 | -0.29 | 1.39E-01 |
| RPL24P4       | -0.27 | 1.71E-01 | 0.29  | 1.39E-01 |
| XLOC_008614   | -0.16 | 4.16E-01 | -0.29 | 1.39E-01 |
| ZNF292        | -0.20 | 3.13E-01 | -0.29 | 1.39E-01 |
| ZNF625        | -0.24 | 2.11E-01 | -0.29 | 1.39E-01 |
| CHRNB4        | -0.03 | 8.69E-01 | -0.29 | 1.39E-01 |
| CTA-384D8.31  | 0.25  | 1.93E-01 | 0.29  | 1.39E-01 |
| CTD-3214K23.1 | 0.01  | 9.69E-01 | 0.29  | 1.39E-01 |
| FUT11         | -0.06 | 7.45E-01 | 0.29  | 1.39E-01 |
| LINC01060     | -0.31 | 1.10E-01 | 0.29  | 1.39E-01 |
| NPM1P6        | -0.04 | 8.57E-01 | -0.29 | 1.39E-01 |
| PROX1-AS1     | -0.45 | 1.68E-02 | 0.29  | 1.39E-01 |
| RP11-146N23.4 | -0.21 | 2.76E-01 | 0.29  | 1.39E-01 |
| RP5-1182A14.5 | -0.03 | 8.95E-01 | -0.29 | 1.39E-01 |
| SMG7-AS1      | 0.09  | 6.56E-01 | -0.29 | 1.39E-01 |
| SRP9P1        | 0.08  | 6.69E-01 | 0.29  | 1.39E-01 |
| USE1          | 0.34  | 7.56E-02 | 0.29  | 1.39E-01 |
| BNIP3P17      | -0.06 | 7.63E-01 | -0.29 | 1.40E-01 |
| CFAP54        | -0.27 | 1.72E-01 | 0.29  | 1.40E-01 |
| CTNND2        | 0.08  | 6.93E-01 | -0.29 | 1.40E-01 |
| DDX25         | -0.18 | 3.65E-01 | -0.29 | 1.40E-01 |
| FLG2          | -0.32 | 9.84E-02 | -0.29 | 1.40E-01 |
| G40986        | 0.46  | 1.50E-02 | -0.29 | 1.40E-01 |
| GPN2          | 0.24  | 2.27E-01 | 0.29  | 1.40E-01 |
| HIGD1AP14     | 0.21  | 2.83E-01 | -0.29 | 1.40E-01 |
| KRTCAP3       | 0.01  | 9.66E-01 | 0.29  | 1.40E-01 |
| NRP2          | 0.08  | 6.96E-01 | 0.29  | 1.40E-01 |
| PCNXL3        | 0.08  | 6.74E-01 | 0.29  | 1.40E-01 |
| PWAR1         | 0.04  | 8.44E-01 | -0.29 | 1.40E-01 |
| RP11-33N14.5  | 0.20  | 3.16E-01 | -0.29 | 1.40E-01 |
| RP3-477O4.5   | 0.01  | 9.50E-01 | -0.29 | 1.40E-01 |
| YWHAEP7       | 0.04  | 8.36E-01 | 0.29  | 1.40E-01 |
| CTD-2026K11.6 | -0.16 | 4.16E-01 | -0.29 | 1.40E-01 |
| CTD-2260A17.2 | 0.26  | 1.79E-01 | 0.29  | 1.40E-01 |
| CXCL3         | -0.06 | 7.72E-01 | 0.29  | 1.40E-01 |
| KCNH8         | -0.21 | 2.89E-01 | -0.29 | 1.40E-01 |
| KIDINS220     | -0.11 | 5.89E-01 | -0.29 | 1.40E-01 |
| LMBRD2        | 0.32  | 9.81E-02 | -0.29 | 1.40E-01 |
| PLCD3         | 0.02  | 9.36E-01 | 0.29  | 1.40E-01 |
| RP11-141B14.2 | 0.29  | 1.38E-01 | -0.29 | 1.40E-01 |

|               |       |          |       |          |
|---------------|-------|----------|-------|----------|
| SCN4B         | 0.47  | 1.18E-02 | 0.29  | 1.40E-01 |
| AC007163.3    | 0.18  | 3.49E-01 | 0.29  | 1.41E-01 |
| CCDC6         | -0.12 | 5.48E-01 | -0.29 | 1.41E-01 |
| CCDC88B       | 0.20  | 3.07E-01 | 0.29  | 1.41E-01 |
| CHKB-CPT1B    | -0.16 | 4.08E-01 | -0.29 | 1.41E-01 |
| EPB41L3       | -0.02 | 9.39E-01 | -0.29 | 1.41E-01 |
| FAM157A       | 0.10  | 6.18E-01 | -0.29 | 1.41E-01 |
| G12463        | -0.17 | 3.94E-01 | -0.29 | 1.41E-01 |
| G29948        | 0.04  | 8.42E-01 | 0.29  | 1.41E-01 |
| HNRNPA1P68    | 0.41  | 2.83E-02 | -0.29 | 1.41E-01 |
| HSFY3P        | 0.17  | 3.83E-01 | 0.29  | 1.41E-01 |
| KLF9          | -0.14 | 4.84E-01 | -0.29 | 1.41E-01 |
| MEF2B         | -0.15 | 4.60E-01 | 0.29  | 1.41E-01 |
| MIR32         | 0.01  | 9.70E-01 | -0.29 | 1.41E-01 |
| MIR627        | -0.08 | 7.02E-01 | -0.29 | 1.41E-01 |
| OR2A13P       | -0.26 | 1.75E-01 | -0.29 | 1.41E-01 |
| PSORS1C2      | 0.52  | 4.70E-03 | 0.29  | 1.41E-01 |
| PTH2R         | -0.13 | 5.23E-01 | -0.29 | 1.41E-01 |
| RGPD1         | -0.13 | 5.09E-01 | -0.29 | 1.41E-01 |
| RP11-20D14.6  | -0.22 | 2.71E-01 | 0.29  | 1.41E-01 |
| RP11-597M17.1 | 0.09  | 6.33E-01 | -0.29 | 1.41E-01 |
| RP3-426I6.2   | -0.17 | 3.97E-01 | -0.29 | 1.41E-01 |
| RP5-1148A21.3 | 0.09  | 6.37E-01 | 0.29  | 1.41E-01 |
| SEMA4C        | -0.26 | 1.84E-01 | 0.29  | 1.41E-01 |
| Z69720.3      | -0.14 | 4.85E-01 | -0.29 | 1.41E-01 |
| ZNF527        | 0.37  | 5.50E-02 | -0.29 | 1.41E-01 |
| C5            | -0.04 | 8.24E-01 | -0.29 | 1.41E-01 |
| CEP104        | 0.14  | 4.74E-01 | 0.29  | 1.41E-01 |
| CST3          | 0.30  | 1.16E-01 | 0.29  | 1.41E-01 |
| CTD-2024P10.2 | -0.20 | 3.09E-01 | -0.29 | 1.41E-01 |
| KIF9-AS1      | 0.27  | 1.61E-01 | 0.29  | 1.41E-01 |
| PCNXL4        | 0.26  | 1.78E-01 | -0.29 | 1.41E-01 |
| RP11-157G21.2 | -0.20 | 2.97E-01 | 0.29  | 1.41E-01 |
| RP11-690P14.4 | 0.15  | 4.35E-01 | -0.29 | 1.41E-01 |
| SLC7A11-AS1   | 0.21  | 2.85E-01 | 0.29  | 1.41E-01 |
| UTRN          | -0.23 | 2.38E-01 | -0.29 | 1.41E-01 |
| BATF          | 0.09  | 6.46E-01 | 0.29  | 1.42E-01 |
| EPX           | -0.05 | 7.92E-01 | -0.29 | 1.42E-01 |
| G1730         | 0.15  | 4.45E-01 | -0.29 | 1.42E-01 |
| GUSBP4        | -0.14 | 4.71E-01 | -0.29 | 1.42E-01 |
| LINC01134     | -0.16 | 4.27E-01 | 0.29  | 1.42E-01 |
| MAN1B1        | -0.07 | 7.07E-01 | 0.29  | 1.42E-01 |
| MIR210HG      | -0.12 | 5.56E-01 | 0.29  | 1.42E-01 |
| MMP24         | -0.20 | 3.18E-01 | -0.29 | 1.42E-01 |
| MRPS30        | 0.22  | 2.71E-01 | -0.29 | 1.42E-01 |
| PPIAP29       | -0.05 | 8.08E-01 | 0.29  | 1.42E-01 |
| PRKY          | 0.28  | 1.52E-01 | 0.29  | 1.42E-01 |



|               |       |          |       |          |
|---------------|-------|----------|-------|----------|
| SETP5         | -0.07 | 7.42E-01 | -0.29 | 1.42E-01 |
| ZP2           | -0.22 | 2.68E-01 | -0.29 | 1.42E-01 |
| CALCRL        | -0.06 | 7.66E-01 | 0.29  | 1.42E-01 |
| CYB561D1      | -0.09 | 6.49E-01 | 0.29  | 1.42E-01 |
| SERPINB4      | 0.32  | 9.81E-02 | 0.29  | 1.42E-01 |
| SLC26A6       | -0.01 | 9.58E-01 | 0.29  | 1.42E-01 |
| TSTD2         | 0.01  | 9.54E-01 | 0.29  | 1.42E-01 |
| COX11         | 0.07  | 7.11E-01 | -0.29 | 1.42E-01 |
| CPE           | -0.26 | 1.77E-01 | -0.29 | 1.42E-01 |
| G2447         | -0.19 | 3.31E-01 | -0.29 | 1.42E-01 |
| GREB1         | -0.26 | 1.88E-01 | -0.29 | 1.42E-01 |
| LINC01552     | -0.10 | 6.05E-01 | -0.29 | 1.42E-01 |
| NPAT          | -0.04 | 8.52E-01 | -0.29 | 1.42E-01 |
| PLLP          | -0.09 | 6.42E-01 | -0.29 | 1.42E-01 |
| RP11-220I1.4  | 0.08  | 6.70E-01 | -0.29 | 1.42E-01 |
| SPG20         | -0.23 | 2.35E-01 | -0.29 | 1.42E-01 |
| UXT-AS1       | -0.18 | 3.49E-01 | -0.29 | 1.42E-01 |
| WNT8B         | -0.16 | 4.14E-01 | -0.29 | 1.42E-01 |
| XLOC_012871   | -0.06 | 7.73E-01 | -0.29 | 1.42E-01 |
| AHNAK         | -0.39 | 3.80E-02 | -0.29 | 1.42E-01 |
| C14orf80      | -0.50 | 6.65E-03 | -0.29 | 1.42E-01 |
| CTC-487M23.7  | -0.41 | 2.96E-02 | -0.29 | 1.42E-01 |
| DPEP2         | 0.07  | 7.32E-01 | 0.29  | 1.42E-01 |
| DSG4          | 0.28  | 1.53E-01 | 0.29  | 1.42E-01 |
| LTBR          | 0.34  | 8.08E-02 | 0.29  | 1.42E-01 |
| OR9Q1         | -0.12 | 5.45E-01 | 0.29  | 1.42E-01 |
| PADI4         | -0.49 | 8.57E-03 | -0.29 | 1.42E-01 |
| PMS1          | 0.08  | 6.97E-01 | -0.29 | 1.42E-01 |
| RN7SKP80      | 0.04  | 8.53E-01 | 0.29  | 1.42E-01 |
| RNASE1        | 0.11  | 5.64E-01 | 0.29  | 1.42E-01 |
| RNU6-171P     | -0.09 | 6.61E-01 | -0.29 | 1.42E-01 |
| RP11-795F19.1 | -0.22 | 2.61E-01 | -0.29 | 1.42E-01 |
| SGCA          | -0.36 | 6.15E-02 | -0.29 | 1.42E-01 |
| TBX4          | 0.36  | 6.22E-02 | 0.29  | 1.42E-01 |
| TMEM63C       | 0.14  | 4.92E-01 | -0.29 | 1.42E-01 |
| AF131217.1    | 0.17  | 3.93E-01 | -0.29 | 1.43E-01 |
| AP3B2         | -0.05 | 8.08E-01 | -0.29 | 1.43E-01 |
| BCL2L15       | 0.07  | 7.40E-01 | 0.29  | 1.43E-01 |
| CTC-463A16.1  | -0.24 | 2.13E-01 | -0.29 | 1.43E-01 |
| FAM50B        | 0.16  | 4.15E-01 | 0.29  | 1.43E-01 |
| G42897        | 0.21  | 2.83E-01 | -0.29 | 1.43E-01 |
| MIRLET7F1     | 0.05  | 7.92E-01 | 0.29  | 1.43E-01 |
| NCF1          | 0.15  | 4.57E-01 | 0.29  | 1.43E-01 |
| RN7SL789P     | -0.13 | 5.22E-01 | 0.29  | 1.43E-01 |
| RP11-20B24.7  | -0.12 | 5.30E-01 | 0.29  | 1.43E-01 |
| ATF7IP        | 0.04  | 8.23E-01 | 0.29  | 1.43E-01 |
| G36254        | 0.11  | 5.85E-01 | -0.29 | 1.43E-01 |

|                |       |          |       |          |
|----------------|-------|----------|-------|----------|
| MAP3K6         | 0.07  | 7.31E-01 | 0.29  | 1.43E-01 |
| MNS1           | -0.16 | 4.20E-01 | -0.29 | 1.43E-01 |
| NPRL2          | 0.11  | 5.85E-01 | 0.29  | 1.43E-01 |
| NQO2           | 0.01  | 9.46E-01 | 0.29  | 1.43E-01 |
| PLEKHH3        | 0.35  | 6.98E-02 | 0.29  | 1.43E-01 |
| RP11-397J20.1  | 0.04  | 8.33E-01 | -0.29 | 1.43E-01 |
| RP11-662B19.1  | 0.21  | 2.73E-01 | 0.29  | 1.43E-01 |
| RP11-89B16.1   | -0.13 | 4.99E-01 | -0.29 | 1.43E-01 |
| RPS3AP3        | 0.14  | 4.71E-01 | 0.29  | 1.43E-01 |
| SLC38A7        | -0.10 | 6.09E-01 | 0.29  | 1.43E-01 |
| SNORD7         | -0.07 | 7.19E-01 | -0.29 | 1.43E-01 |
| ST8SIA6-AS1    | -0.05 | 8.11E-01 | -0.29 | 1.43E-01 |
| TPT1P10        | -0.39 | 4.20E-02 | -0.29 | 1.43E-01 |
| CTD-2619J13.19 | -0.04 | 8.23E-01 | 0.29  | 1.44E-01 |
| FAM43A         | 0.41  | 2.89E-02 | 0.29  | 1.44E-01 |
| MLKL           | 0.24  | 2.13E-01 | 0.29  | 1.44E-01 |
| UNC13D         | 0.29  | 1.35E-01 | 0.29  | 1.44E-01 |
| AC018867.2     | 0.30  | 1.17E-01 | -0.29 | 1.44E-01 |
| ACSBG2         | 0.10  | 6.25E-01 | -0.29 | 1.44E-01 |
| CTD-2537I9.18  | 0.17  | 3.81E-01 | -0.29 | 1.44E-01 |
| FOXO6          | -0.27 | 1.70E-01 | -0.29 | 1.44E-01 |
| PLEKHA3        | 0.08  | 6.89E-01 | -0.29 | 1.44E-01 |
| SLC26A5        | -0.15 | 4.60E-01 | -0.29 | 1.44E-01 |
| AP000304.1     | -0.13 | 5.18E-01 | -0.29 | 1.44E-01 |
| ASS1P10        | -0.05 | 7.99E-01 | -0.29 | 1.44E-01 |
| FOXJ2          | -0.11 | 5.81E-01 | -0.29 | 1.44E-01 |
| KLHL32         | -0.21 | 2.84E-01 | -0.29 | 1.44E-01 |
| LINC00892      | 0.11  | 5.83E-01 | 0.29  | 1.44E-01 |
| MSL3P1         | 0.23  | 2.35E-01 | 0.29  | 1.44E-01 |
| PCDHB12        | -0.09 | 6.36E-01 | 0.29  | 1.44E-01 |
| PHYHIPL        | 0.11  | 5.92E-01 | -0.29 | 1.44E-01 |
| RP11-1006G14.1 | -0.03 | 8.94E-01 | -0.29 | 1.44E-01 |
| RPS3AP40       | -0.04 | 8.46E-01 | -0.29 | 1.44E-01 |
| TTC3P1         | -0.33 | 8.87E-02 | -0.29 | 1.44E-01 |
| ZNF317         | 0.08  | 6.75E-01 | 0.29  | 1.44E-01 |
| CCDC15         | -0.04 | 8.30E-01 | -0.29 | 1.45E-01 |
| CORT           | 0.18  | 3.64E-01 | -0.29 | 1.45E-01 |
| COX15          | 0.05  | 8.02E-01 | 0.29  | 1.45E-01 |
| GCOM2          | -0.17 | 3.86E-01 | -0.29 | 1.45E-01 |
| GNA12          | 0.25  | 2.05E-01 | 0.29  | 1.45E-01 |
| MIR4742        | -0.19 | 3.41E-01 | -0.29 | 1.45E-01 |
| PSMA6P1        | 0.33  | 8.59E-02 | 0.29  | 1.45E-01 |
| RP11-1277A3.2  | -0.24 | 2.14E-01 | 0.29  | 1.45E-01 |
| SLC27A3        | 0.12  | 5.41E-01 | 0.29  | 1.45E-01 |
| STAG3          | -0.20 | 2.96E-01 | -0.29 | 1.45E-01 |
| ZNF793-AS1     | -0.35 | 7.05E-02 | 0.29  | 1.45E-01 |
| G22374         | -0.13 | 4.95E-01 | -0.29 | 1.45E-01 |

|                |       |          |       |          |
|----------------|-------|----------|-------|----------|
| NPRL3          | 0.05  | 8.14E-01 | 0.29  | 1.45E-01 |
| PBXIP1         | 0.09  | 6.56E-01 | 0.29  | 1.45E-01 |
| PLCD1          | 0.36  | 5.74E-02 | 0.29  | 1.45E-01 |
| RP11-730G20.2  | 0.08  | 6.76E-01 | -0.29 | 1.45E-01 |
| SUFU           | 0.12  | 5.33E-01 | 0.29  | 1.45E-01 |
| TBC1D2         | 0.03  | 8.80E-01 | 0.29  | 1.45E-01 |
| TGIF2          | 0.46  | 1.43E-02 | 0.29  | 1.45E-01 |
| YIPF6          | 0.24  | 2.15E-01 | -0.29 | 1.45E-01 |
| AADAT          | 0.09  | 6.33E-01 | -0.29 | 1.46E-01 |
| AC007563.3     | -0.28 | 1.49E-01 | -0.29 | 1.46E-01 |
| APOBEC3C       | 0.12  | 5.29E-01 | 0.29  | 1.46E-01 |
| AQP4           | 0.02  | 9.10E-01 | -0.29 | 1.46E-01 |
| CEP57L1        | -0.02 | 9.28E-01 | -0.29 | 1.46E-01 |
| CTD-3075F15.1  | 0.01  | 9.79E-01 | 0.29  | 1.46E-01 |
| CYB5A          | 0.21  | 2.90E-01 | -0.29 | 1.46E-01 |
| EIF4EP2        | 0.07  | 7.21E-01 | 0.29  | 1.46E-01 |
| GCFC2          | -0.06 | 7.75E-01 | -0.29 | 1.46E-01 |
| RP11-182I10.2  | 0.05  | 8.04E-01 | -0.29 | 1.46E-01 |
| RP11-488L18.10 | 0.05  | 8.16E-01 | -0.29 | 1.46E-01 |
| RPS20P33       | -0.34 | 7.92E-02 | 0.29  | 1.46E-01 |
| RUNX3          | 0.15  | 4.54E-01 | 0.29  | 1.46E-01 |
| SATB2          | 0.02  | 9.25E-01 | 0.29  | 1.46E-01 |
| TANGO2         | -0.12 | 5.31E-01 | 0.29  | 1.46E-01 |
| TMEM132B       | -0.41 | 3.04E-02 | -0.29 | 1.46E-01 |
| TRIM26         | 0.34  | 7.64E-02 | 0.29  | 1.46E-01 |
| TYW5           | 0.19  | 3.30E-01 | -0.29 | 1.46E-01 |
| UGT1A10        | 0.18  | 3.57E-01 | 0.29  | 1.46E-01 |
| VIT            | -0.27 | 1.70E-01 | 0.29  | 1.46E-01 |
| XLOC_007109    | 0.13  | 4.93E-01 | -0.29 | 1.46E-01 |
| ASPRV1         | -0.04 | 8.56E-01 | 0.29  | 1.46E-01 |
| CCDC58P5       | 0.14  | 4.79E-01 | -0.29 | 1.46E-01 |
| CIART          | -0.25 | 2.02E-01 | -0.29 | 1.46E-01 |
| DDX17          | -0.08 | 6.80E-01 | -0.29 | 1.46E-01 |
| DYNAP          | 0.19  | 3.36E-01 | -0.29 | 1.46E-01 |
| G32319         | 0.10  | 6.24E-01 | 0.29  | 1.46E-01 |
| KCTD16         | -0.05 | 8.17E-01 | -0.29 | 1.46E-01 |
| LIPT1          | -0.06 | 7.75E-01 | -0.29 | 1.46E-01 |
| PSMB9          | 0.06  | 7.51E-01 | 0.29  | 1.46E-01 |
| RNU6-306P      | -0.13 | 5.01E-01 | -0.29 | 1.46E-01 |
| RP11-94A24.1   | -0.19 | 3.26E-01 | 0.29  | 1.46E-01 |
| RPS26P47       | -0.02 | 9.01E-01 | -0.29 | 1.46E-01 |
| TAF12          | 0.02  | 9.15E-01 | 0.29  | 1.46E-01 |
| TRAPPC4        | 0.19  | 3.26E-01 | 0.29  | 1.46E-01 |
| ZNF727         | -0.34 | 7.29E-02 | -0.29 | 1.46E-01 |
| ASPH           | -0.07 | 7.14E-01 | -0.29 | 1.46E-01 |
| C3orf52        | -0.36 | 5.88E-02 | -0.29 | 1.46E-01 |
| FAM188A        | -0.25 | 1.93E-01 | -0.29 | 1.46E-01 |

|                      |       |          |       |          |
|----------------------|-------|----------|-------|----------|
| <b>RP11-114H23.1</b> | -0.41 | 2.85E-02 | -0.29 | 1.46E-01 |
| <b>SF3A3P1</b>       | -0.08 | 6.68E-01 | -0.29 | 1.46E-01 |
| <b>SNAPC4</b>        | 0.06  | 7.49E-01 | -0.29 | 1.46E-01 |
| <b>TRMT13</b>        | -0.04 | 8.26E-01 | -0.29 | 1.46E-01 |
| <b>AC004540.5</b>    | 0.14  | 4.85E-01 | 0.29  | 1.46E-01 |
| <b>ERICH6-AS1</b>    | 0.00  | 9.93E-01 | 0.29  | 1.46E-01 |
| <b>ERMAP</b>         | -0.08 | 6.74E-01 | 0.29  | 1.46E-01 |
| <b>KMT2E-AS1</b>     | -0.25 | 1.98E-01 | 0.29  | 1.46E-01 |
| <b>LAPTM5</b>        | 0.33  | 9.12E-02 | 0.29  | 1.46E-01 |
| <b>MX1</b>           | 0.33  | 8.24E-02 | 0.29  | 1.46E-01 |
| <b>RPS4Y1</b>        | 0.18  | 3.59E-01 | 0.29  | 1.46E-01 |
| <b>CCDC163P</b>      | 0.15  | 4.42E-01 | 0.29  | 1.47E-01 |
| <b>CRCT1</b>         | 0.18  | 3.65E-01 | 0.29  | 1.47E-01 |
| <b>CTD-2554C21.3</b> | -0.05 | 7.99E-01 | -0.29 | 1.47E-01 |
| <b>CYYR1</b>         | 0.02  | 9.26E-01 | 0.29  | 1.47E-01 |
| <b>F2RL2</b>         | -0.15 | 4.34E-01 | 0.29  | 1.47E-01 |
| <b>GDF6</b>          | -0.19 | 3.40E-01 | 0.29  | 1.47E-01 |
| <b>IGKV4-1</b>       | 0.54  | 3.06E-03 | 0.29  | 1.47E-01 |
| <b>LRRC4</b>         | 0.00  | 9.82E-01 | 0.29  | 1.47E-01 |
| <b>NUTM2B-AS1</b>    | -0.01 | 9.40E-01 | -0.29 | 1.47E-01 |
| <b>RNU6-26P</b>      | -0.24 | 2.13E-01 | 0.29  | 1.47E-01 |
| <b>RP3-467N11.1</b>  | 0.01  | 9.40E-01 | 0.29  | 1.47E-01 |
| <b>TSHZ1</b>         | 0.13  | 4.96E-01 | 0.29  | 1.47E-01 |
| <b>C2CD2</b>         | -0.10 | 6.27E-01 | -0.29 | 1.47E-01 |
| <b>CEP83</b>         | -0.11 | 5.68E-01 | -0.29 | 1.47E-01 |
| <b>CTC-436P18.5</b>  | -0.09 | 6.47E-01 | -0.29 | 1.47E-01 |
| <b>ERICH3</b>        | 0.33  | 8.81E-02 | 0.29  | 1.47E-01 |
| <b>KCNJ2</b>         | 0.42  | 2.50E-02 | 0.29  | 1.47E-01 |
| <b>MAGEH1</b>        | -0.31 | 1.03E-01 | -0.29 | 1.47E-01 |
| <b>RP11-108O10.2</b> | -0.10 | 6.14E-01 | -0.29 | 1.47E-01 |
| <b>RP11-456J20.1</b> | -0.15 | 4.38E-01 | -0.29 | 1.47E-01 |
| <b>RP11-65L3.4</b>   | 0.01  | 9.46E-01 | -0.29 | 1.47E-01 |
| <b>SPECC1L</b>       | 0.19  | 3.24E-01 | 0.29  | 1.47E-01 |
| <b>TRIM32</b>        | -0.07 | 7.39E-01 | -0.29 | 1.47E-01 |
| <b>BRPF3</b>         | 0.00  | 9.98E-01 | 0.29  | 1.48E-01 |
| <b>FUT4</b>          | -0.05 | 7.92E-01 | -0.29 | 1.48E-01 |
| <b>GSTK1</b>         | 0.10  | 6.31E-01 | 0.29  | 1.48E-01 |
| <b>MYO1C</b>         | 0.01  | 9.57E-01 | 0.29  | 1.48E-01 |
| <b>RN7SKP173</b>     | -0.15 | 4.39E-01 | -0.29 | 1.48E-01 |
| <b>RP1-47A17.1</b>   | -0.15 | 4.38E-01 | 0.29  | 1.48E-01 |
| <b>RP11-138A9.1</b>  | 0.04  | 8.46E-01 | -0.29 | 1.48E-01 |
| <b>RPS6KB2</b>       | -0.08 | 6.84E-01 | 0.29  | 1.48E-01 |
| <b>SNHG6</b>         | 0.04  | 8.52E-01 | -0.29 | 1.48E-01 |
| <b>VSNL1</b>         | 0.32  | 9.45E-02 | 0.29  | 1.48E-01 |
| <b>ZBTB45</b>        | 0.22  | 2.60E-01 | 0.29  | 1.48E-01 |
| <b>AC114812.8</b>    | -0.04 | 8.26E-01 | -0.29 | 1.48E-01 |
| <b>C17orf107</b>     | 0.28  | 1.45E-01 | 0.29  | 1.48E-01 |

|               |       |          |       |          |
|---------------|-------|----------|-------|----------|
| CCR8          | -0.22 | 2.60E-01 | 0.29  | 1.48E-01 |
| CELSR1        | -0.01 | 9.56E-01 | 0.29  | 1.48E-01 |
| ENDOV         | 0.15  | 4.56E-01 | -0.29 | 1.48E-01 |
| LGALS9        | 0.11  | 5.92E-01 | 0.29  | 1.48E-01 |
| POLB          | 0.16  | 4.17E-01 | 0.29  | 1.48E-01 |
| RP11-378J18.8 | 0.27  | 1.67E-01 | -0.29 | 1.48E-01 |
| RP4-672N11.1  | -0.44 | 1.83E-02 | -0.29 | 1.48E-01 |
| RP4-724E16.2  | 0.07  | 7.09E-01 | 0.29  | 1.48E-01 |
| AC007551.1    | -0.17 | 3.93E-01 | -0.29 | 1.49E-01 |
| AC073284.4    | -0.23 | 2.45E-01 | -0.29 | 1.49E-01 |
| APBB1IP       | 0.20  | 3.11E-01 | 0.29  | 1.49E-01 |
| BACE1         | 0.15  | 4.43E-01 | 0.29  | 1.49E-01 |
| COL19A1       | -0.02 | 9.35E-01 | -0.29 | 1.49E-01 |
| CTD-2260A17.3 | -0.21 | 2.93E-01 | -0.29 | 1.49E-01 |
| GAL3ST1       | -0.01 | 9.49E-01 | -0.29 | 1.49E-01 |
| IL12RB1       | 0.24  | 2.27E-01 | 0.29  | 1.49E-01 |
| KB-1562D12.3  | 0.08  | 7.02E-01 | -0.29 | 1.49E-01 |
| MATK          | 0.15  | 4.49E-01 | 0.29  | 1.49E-01 |
| RP11-49G2.3   | -0.29 | 1.31E-01 | -0.29 | 1.49E-01 |
| RP11-62F24.2  | 0.22  | 2.68E-01 | -0.29 | 1.49E-01 |
| ZNF385A       | 0.01  | 9.55E-01 | 0.29  | 1.49E-01 |
| AIP           | 0.02  | 9.26E-01 | 0.29  | 1.49E-01 |
| BMPR1A        | -0.18 | 3.58E-01 | -0.29 | 1.49E-01 |
| C1orf233      | -0.10 | 6.28E-01 | 0.29  | 1.49E-01 |
| CTB-60B18.18  | -0.11 | 5.71E-01 | -0.29 | 1.49E-01 |
| PARP15        | 0.03  | 8.80E-01 | 0.29  | 1.49E-01 |
| PI4K2A        | 0.38  | 4.41E-02 | 0.29  | 1.49E-01 |
| PRR13         | 0.09  | 6.41E-01 | 0.29  | 1.49E-01 |
| RP11-475A13.1 | -0.36 | 5.92E-02 | 0.29  | 1.49E-01 |
| RP3-496C20.1  | -0.08 | 6.76E-01 | -0.29 | 1.49E-01 |
| RP5-997D16.2  | 0.30  | 1.15E-01 | 0.29  | 1.49E-01 |
| RRN3          | 0.02  | 9.04E-01 | -0.29 | 1.49E-01 |
| TRAF6         | -0.11 | 5.63E-01 | -0.29 | 1.49E-01 |
| XLOC_011990   | -0.03 | 8.62E-01 | -0.29 | 1.49E-01 |
| AC106786.1    | 0.26  | 1.86E-01 | 0.28  | 1.50E-01 |
| ARID2         | -0.19 | 3.29E-01 | -0.28 | 1.50E-01 |
| CLEC1B        | -0.14 | 4.88E-01 | -0.28 | 1.50E-01 |
| KREMEN1       | 0.32  | 9.87E-02 | 0.28  | 1.50E-01 |
| METAP1D       | -0.14 | 4.89E-01 | -0.28 | 1.50E-01 |
| MYL6B         | 0.16  | 4.19E-01 | 0.28  | 1.50E-01 |
| PKD1L1        | -0.08 | 6.71E-01 | -0.28 | 1.50E-01 |
| RNA5SP201     | -0.30 | 1.22E-01 | -0.28 | 1.50E-01 |
| RP11-165A20.3 | -0.35 | 6.77E-02 | 0.28  | 1.50E-01 |
| RP11-57H12.2  | -0.38 | 4.33E-02 | -0.28 | 1.50E-01 |
| RP11-767L7.2  | -0.07 | 7.23E-01 | 0.28  | 1.50E-01 |
| RTN4RL2       | 0.02  | 9.26E-01 | 0.28  | 1.50E-01 |
| SDAD1P4       | -0.05 | 8.19E-01 | -0.28 | 1.50E-01 |

|               |       |          |       |          |
|---------------|-------|----------|-------|----------|
| TADA1         | -0.04 | 8.21E-01 | -0.28 | 1.50E-01 |
| CCDC181       | -0.23 | 2.47E-01 | -0.28 | 1.50E-01 |
| DBT           | 0.09  | 6.58E-01 | 0.28  | 1.50E-01 |
| FAM107A       | -0.34 | 7.32E-02 | -0.28 | 1.50E-01 |
| FCGR1B        | 0.08  | 6.91E-01 | -0.28 | 1.50E-01 |
| FNTAP2        | 0.07  | 7.27E-01 | -0.28 | 1.50E-01 |
| GFRA2         | -0.25 | 2.09E-01 | 0.28  | 1.50E-01 |
| NPTX2         | -0.25 | 2.02E-01 | -0.28 | 1.50E-01 |
| PCDHA5        | 0.10  | 6.25E-01 | 0.28  | 1.50E-01 |
| RIBC2         | 0.13  | 5.01E-01 | -0.28 | 1.50E-01 |
| RNU6-57P      | -0.19 | 3.26E-01 | -0.28 | 1.50E-01 |
| RP11-123B3.2  | -0.27 | 1.71E-01 | 0.28  | 1.50E-01 |
| RP11-347E10.1 | -0.10 | 5.98E-01 | -0.28 | 1.50E-01 |
| RP11-51J9.6   | -0.28 | 1.56E-01 | -0.28 | 1.50E-01 |
| RP11-802O23.3 | -0.10 | 6.18E-01 | 0.28  | 1.50E-01 |
| RPL35P6       | -0.21 | 2.87E-01 | -0.28 | 1.50E-01 |
| ZNF295-AS1    | -0.31 | 1.06E-01 | -0.28 | 1.50E-01 |
| BEAN1         | -0.09 | 6.37E-01 | -0.28 | 1.51E-01 |
| BNIP3P29      | -0.04 | 8.21E-01 | -0.28 | 1.51E-01 |
| FBXW5         | 0.08  | 6.88E-01 | 0.28  | 1.51E-01 |
| IGSF5         | -0.13 | 4.95E-01 | -0.28 | 1.51E-01 |
| MAML1         | 0.19  | 3.25E-01 | 0.28  | 1.51E-01 |
| MGAT5B        | -0.30 | 1.24E-01 | 0.28  | 1.51E-01 |
| NDUFA13       | 0.32  | 1.00E-01 | -0.28 | 1.51E-01 |
| RP11-181C21.4 | -0.26 | 1.85E-01 | 0.28  | 1.51E-01 |
| RP11-554E23.4 | -0.27 | 1.70E-01 | -0.28 | 1.51E-01 |
| RRAGD         | -0.15 | 4.34E-01 | -0.28 | 1.51E-01 |
| SGMS2         | -0.06 | 7.54E-01 | -0.28 | 1.51E-01 |
| SPTA1         | 0.39  | 3.76E-02 | 0.28  | 1.51E-01 |
| AC007317.1    | -0.16 | 4.09E-01 | -0.28 | 1.51E-01 |
| AC024580.1    | 0.25  | 2.00E-01 | 0.28  | 1.51E-01 |
| BAK1          | 0.25  | 1.94E-01 | 0.28  | 1.51E-01 |
| DUT           | 0.02  | 9.16E-01 | -0.28 | 1.51E-01 |
| G4440         | -0.15 | 4.48E-01 | -0.28 | 1.51E-01 |
| HSPA1L        | -0.13 | 5.12E-01 | -0.28 | 1.51E-01 |
| IP6K1         | -0.05 | 7.82E-01 | 0.28  | 1.51E-01 |
| KCNK3         | -0.38 | 4.49E-02 | 0.28  | 1.51E-01 |
| KIF18A        | 0.14  | 4.74E-01 | 0.28  | 1.51E-01 |
| LCP2          | 0.21  | 2.95E-01 | 0.28  | 1.51E-01 |
| MS4A7         | 0.08  | 6.93E-01 | 0.28  | 1.51E-01 |
| NADK2-AS1     | 0.00  | 9.81E-01 | -0.28 | 1.51E-01 |
| RN7SKP116     | -0.10 | 6.15E-01 | -0.28 | 1.51E-01 |
| RP11-293M10.2 | -0.03 | 8.91E-01 | -0.28 | 1.51E-01 |
| RP11-363J20.2 | -0.02 | 9.01E-01 | -0.28 | 1.51E-01 |
| RP11-452G18.2 | 0.16  | 4.26E-01 | 0.28  | 1.51E-01 |
| RP11-6B6.3    | -0.20 | 3.11E-01 | -0.28 | 1.51E-01 |
| RP11-74E22.4  | -0.29 | 1.36E-01 | -0.28 | 1.51E-01 |

|                      |       |          |       |          |
|----------------------|-------|----------|-------|----------|
| <b>TOP3A</b>         | 0.18  | 3.57E-01 | 0.28  | 1.51E-01 |
| <b>HS3ST1</b>        | 0.34  | 7.37E-02 | 0.28  | 1.51E-01 |
| <b>KRT16P2</b>       | 0.38  | 4.73E-02 | 0.28  | 1.51E-01 |
| <b>LLNLR-304A6.1</b> | 0.21  | 2.89E-01 | 0.28  | 1.51E-01 |
| <b>NRSN2</b>         | 0.07  | 7.32E-01 | 0.28  | 1.51E-01 |
| <b>RP11-38G5.2</b>   | -0.18 | 3.63E-01 | -0.28 | 1.51E-01 |
| <b>STK3</b>          | -0.19 | 3.44E-01 | -0.28 | 1.51E-01 |
| <b>UNGP3</b>         | 0.06  | 7.48E-01 | 0.28  | 1.51E-01 |
| <b>USP53</b>         | 0.15  | 4.49E-01 | -0.28 | 1.51E-01 |
| <b>CCR4</b>          | 0.19  | 3.41E-01 | 0.28  | 1.52E-01 |
| <b>CD84</b>          | 0.34  | 7.64E-02 | 0.28  | 1.52E-01 |
| <b>CSTF3</b>         | 0.09  | 6.40E-01 | -0.28 | 1.52E-01 |
| <b>CTC-281F24.5</b>  | 0.01  | 9.60E-01 | -0.28 | 1.52E-01 |
| <b>FAM222A-AS1</b>   | 0.13  | 4.96E-01 | -0.28 | 1.52E-01 |
| <b>LRG1</b>          | 0.42  | 2.73E-02 | 0.28  | 1.52E-01 |
| <b>MICU3</b>         | -0.22 | 2.71E-01 | -0.28 | 1.52E-01 |
| <b>MUS81</b>         | -0.03 | 8.98E-01 | 0.28  | 1.52E-01 |
| <b>ORAOV1</b>        | -0.08 | 6.80E-01 | -0.28 | 1.52E-01 |
| <b>PVRL1</b>         | 0.43  | 2.11E-02 | 0.28  | 1.52E-01 |
| <b>RP1-206D15.5</b>  | -0.32 | 9.81E-02 | -0.28 | 1.52E-01 |
| <b>RP11-317N8.5</b>  | 0.20  | 3.14E-01 | 0.28  | 1.52E-01 |
| <b>RP11-589N15.2</b> | 0.32  | 9.39E-02 | 0.28  | 1.52E-01 |
| <b>RP5-994D16.11</b> | 0.01  | 9.43E-01 | -0.28 | 1.52E-01 |
| <b>SH3RF1</b>        | -0.09 | 6.54E-01 | -0.28 | 1.52E-01 |
| <b>TUBA1A</b>        | -0.21 | 2.74E-01 | -0.28 | 1.52E-01 |
| <b>AGBL3</b>         | -0.37 | 5.05E-02 | -0.28 | 1.52E-01 |
| <b>ANKH</b>          | -0.20 | 3.17E-01 | -0.28 | 1.52E-01 |
| <b>CCZ1B</b>         | -0.12 | 5.32E-01 | -0.28 | 1.52E-01 |
| <b>CTC-542B22.2</b>  | 0.26  | 1.77E-01 | -0.28 | 1.52E-01 |
| <b>L3HYPDH</b>       | 0.08  | 6.84E-01 | -0.28 | 1.52E-01 |
| <b>MIR1262</b>       | -0.01 | 9.69E-01 | -0.28 | 1.52E-01 |
| <b>RP11-11N7.4</b>   | -0.31 | 1.08E-01 | -0.28 | 1.52E-01 |
| <b>ZNF567</b>        | -0.45 | 1.75E-02 | -0.28 | 1.52E-01 |
| <b>BDH1</b>          | 0.26  | 1.81E-01 | 0.28  | 1.52E-01 |
| <b>CACNA2D3-AS1</b>  | 0.12  | 5.46E-01 | 0.28  | 1.52E-01 |
| <b>EHBP1</b>         | -0.11 | 5.78E-01 | 0.28  | 1.52E-01 |
| <b>FAM193A</b>       | 0.12  | 5.56E-01 | 0.28  | 1.52E-01 |
| <b>G36323</b>        | 0.41  | 3.23E-02 | 0.28  | 1.52E-01 |
| <b>G8456</b>         | 0.11  | 5.73E-01 | 0.28  | 1.52E-01 |
| <b>MOSPD3</b>        | -0.03 | 8.91E-01 | 0.28  | 1.52E-01 |
| <b>PCSK1N</b>        | 0.06  | 7.50E-01 | 0.28  | 1.52E-01 |
| <b>PTP4A2P2</b>      | -0.10 | 6.04E-01 | 0.28  | 1.52E-01 |
| <b>AC121251.1</b>    | 0.01  | 9.42E-01 | 0.28  | 1.53E-01 |
| <b>ANO1</b>          | -0.09 | 6.42E-01 | 0.28  | 1.53E-01 |
| <b>CCDC168</b>       | -0.07 | 7.40E-01 | -0.28 | 1.53E-01 |
| <b>CFAP97</b>        | 0.01  | 9.56E-01 | -0.28 | 1.53E-01 |
| <b>G26457</b>        | -0.14 | 4.67E-01 | 0.28  | 1.53E-01 |

|                       |       |          |       |          |
|-----------------------|-------|----------|-------|----------|
| <b>HNRNPA3P15</b>     | 0.00  | 9.99E-01 | 0.28  | 1.53E-01 |
| <b>ITGB2</b>          | 0.17  | 3.96E-01 | 0.28  | 1.53E-01 |
| <b>KCNC4-AS1</b>      | 0.42  | 2.44E-02 | 0.28  | 1.53E-01 |
| <b>LINC01410</b>      | 0.09  | 6.43E-01 | -0.28 | 1.53E-01 |
| <b>RALGAPB</b>        | -0.20 | 3.20E-01 | -0.28 | 1.53E-01 |
| <b>RASSF4</b>         | 0.01  | 9.79E-01 | 0.28  | 1.53E-01 |
| <b>RNU6ATAC16P</b>    | 0.08  | 6.85E-01 | -0.28 | 1.53E-01 |
| <b>RNU7-110P</b>      | -0.17 | 4.00E-01 | -0.28 | 1.53E-01 |
| <b>RP11-196G18.3</b>  | 0.13  | 5.10E-01 | -0.28 | 1.53E-01 |
| <b>RP11-392O17.2</b>  | -0.18 | 3.65E-01 | -0.28 | 1.53E-01 |
| <b>RP11-7005.2</b>    | 0.08  | 6.89E-01 | 0.28  | 1.53E-01 |
| <b>SECTM1</b>         | 0.07  | 7.22E-01 | 0.28  | 1.53E-01 |
| <b>SYDE2</b>          | -0.03 | 8.70E-01 | -0.28 | 1.53E-01 |
| <b>AC016700.2</b>     | -0.14 | 4.66E-01 | -0.28 | 1.53E-01 |
| <b>AKR1C6P</b>        | 0.06  | 7.57E-01 | -0.28 | 1.53E-01 |
| <b>CDH3</b>           | 0.22  | 2.51E-01 | 0.28  | 1.53E-01 |
| <b>FZD3</b>           | -0.15 | 4.46E-01 | -0.28 | 1.53E-01 |
| <b>G1047</b>          | 0.17  | 4.00E-01 | 0.28  | 1.53E-01 |
| <b>G1920</b>          | -0.23 | 2.44E-01 | -0.28 | 1.53E-01 |
| <b>HMGB3P21</b>       | -0.03 | 8.62E-01 | -0.28 | 1.53E-01 |
| <b>HSPE1P22</b>       | 0.19  | 3.32E-01 | 0.28  | 1.53E-01 |
| <b>IRF8</b>           | 0.29  | 1.39E-01 | 0.28  | 1.53E-01 |
| <b>PITPNM1</b>        | 0.36  | 6.28E-02 | 0.28  | 1.53E-01 |
| <b>RP1-80N2.2</b>     | -0.47 | 1.17E-02 | 0.28  | 1.53E-01 |
| <b>RP11-283I3.6</b>   | -0.05 | 7.85E-01 | -0.28 | 1.53E-01 |
| <b>RP11-342F17.1</b>  | 0.01  | 9.53E-01 | 0.28  | 1.53E-01 |
| <b>RP11-363H12.1</b>  | -0.20 | 3.17E-01 | 0.28  | 1.53E-01 |
| <b>RP11-3K24.1</b>    | 0.32  | 9.84E-02 | 0.28  | 1.53E-01 |
| <b>RP11-885B4.2</b>   | 0.04  | 8.37E-01 | 0.28  | 1.53E-01 |
| <b>SLC9A2</b>         | -0.13 | 5.21E-01 | -0.28 | 1.53E-01 |
| <b>USP27X-AS1</b>     | 0.16  | 4.11E-01 | -0.28 | 1.53E-01 |
| <b>VN1R81P</b>        | -0.15 | 4.51E-01 | 0.28  | 1.53E-01 |
| <b>XPNPEP1</b>        | 0.07  | 7.42E-01 | -0.28 | 1.53E-01 |
| <b>AC006978.6</b>     | -0.13 | 5.25E-01 | 0.28  | 1.54E-01 |
| <b>G113</b>           | 0.05  | 7.91E-01 | -0.28 | 1.54E-01 |
| <b>KB-1460A1.1</b>    | -0.38 | 4.36E-02 | -0.28 | 1.54E-01 |
| <b>MTCO1P15</b>       | -0.43 | 2.17E-02 | 0.28  | 1.54E-01 |
| <b>RP11-1072C15.4</b> | -0.02 | 9.38E-01 | -0.28 | 1.54E-01 |
| <b>RP11-10L7.1</b>    | 0.05  | 7.89E-01 | -0.28 | 1.54E-01 |
| <b>RP11-496D24.2</b>  | -0.04 | 8.44E-01 | -0.28 | 1.54E-01 |
| <b>RP11-65I12.1</b>   | 0.21  | 2.72E-01 | -0.28 | 1.54E-01 |
| <b>RP11-96C23.12</b>  | 0.10  | 6.29E-01 | 0.28  | 1.54E-01 |
| <b>RP5-1077I2.3</b>   | -0.16 | 4.10E-01 | -0.28 | 1.54E-01 |
| <b>TDP2</b>           | 0.26  | 1.74E-01 | 0.28  | 1.54E-01 |
| <b>ZNF467</b>         | -0.06 | 7.54E-01 | 0.28  | 1.54E-01 |
| <b>BTBD11</b>         | 0.24  | 2.28E-01 | 0.28  | 1.54E-01 |
| <b>C1orf50</b>        | -0.07 | 7.16E-01 | 0.28  | 1.54E-01 |



|               |       |          |       |          |
|---------------|-------|----------|-------|----------|
| CSMD2         | 0.04  | 8.46E-01 | 0.28  | 1.54E-01 |
| HPCAL1        | 0.28  | 1.54E-01 | 0.28  | 1.54E-01 |
| RN7SL49P      | -0.10 | 6.18E-01 | 0.28  | 1.54E-01 |
| RP11-807H7.2  | 0.01  | 9.54E-01 | 0.28  | 1.54E-01 |
| G2449         | 0.04  | 8.27E-01 | -0.28 | 1.54E-01 |
| GLIDR         | 0.26  | 1.86E-01 | -0.28 | 1.54E-01 |
| LRRC3B        | -0.38 | 4.49E-02 | -0.28 | 1.54E-01 |
| LTV1P1        | -0.35 | 6.44E-02 | -0.28 | 1.54E-01 |
| RYR2          | -0.26 | 1.83E-01 | -0.28 | 1.54E-01 |
| AC018804.7    | 0.17  | 3.98E-01 | -0.28 | 1.55E-01 |
| APOBEC3G      | 0.27  | 1.69E-01 | 0.28  | 1.55E-01 |
| EEF1A1P13     | 0.14  | 4.64E-01 | 0.28  | 1.55E-01 |
| ELF5          | 0.16  | 4.30E-01 | 0.28  | 1.55E-01 |
| EOMES         | 0.17  | 3.96E-01 | -0.28 | 1.55E-01 |
| EPHA4         | 0.39  | 4.29E-02 | 0.28  | 1.55E-01 |
| ERMN          | -0.05 | 8.12E-01 | -0.28 | 1.55E-01 |
| HCG15         | 0.17  | 3.73E-01 | -0.28 | 1.55E-01 |
| LSP1          | -0.15 | 4.51E-01 | -0.28 | 1.55E-01 |
| MOB3C         | 0.30  | 1.17E-01 | 0.28  | 1.55E-01 |
| NKD2          | -0.30 | 1.18E-01 | 0.28  | 1.55E-01 |
| PM20D1        | 0.02  | 9.09E-01 | -0.28 | 1.55E-01 |
| PYGO1         | 0.16  | 4.26E-01 | -0.28 | 1.55E-01 |
| RP11-414C23.1 | 0.22  | 2.65E-01 | 0.28  | 1.55E-01 |
| RP13-514E23.1 | -0.58 | 1.15E-03 | -0.28 | 1.55E-01 |
| RP13-890H12.2 | 0.22  | 2.63E-01 | -0.28 | 1.55E-01 |
| RP5-1068E13.7 | -0.19 | 3.25E-01 | -0.28 | 1.55E-01 |
| SNORD127      | 0.28  | 1.55E-01 | -0.28 | 1.55E-01 |
| TEN1          | 0.34  | 7.84E-02 | 0.28  | 1.55E-01 |
| VEGFB         | 0.06  | 7.73E-01 | 0.28  | 1.55E-01 |
| ANP32E        | -0.01 | 9.76E-01 | -0.28 | 1.55E-01 |
| CTC-296K1.4   | -0.07 | 7.39E-01 | 0.28  | 1.55E-01 |
| CTD-2013N17.6 | -0.01 | 9.65E-01 | -0.28 | 1.55E-01 |
| FKBP7         | -0.17 | 3.87E-01 | -0.28 | 1.55E-01 |
| G39463        | -0.28 | 1.44E-01 | -0.28 | 1.55E-01 |
| HOXC4         | -0.07 | 7.07E-01 | 0.28  | 1.55E-01 |
| IFI35         | 0.14  | 4.70E-01 | 0.28  | 1.55E-01 |
| MIR4504       | 0.15  | 4.33E-01 | 0.28  | 1.55E-01 |
| MTND4P23      | -0.15 | 4.53E-01 | -0.28 | 1.55E-01 |
| OLAH          | -0.18 | 3.65E-01 | -0.28 | 1.55E-01 |
| RABEP2        | -0.13 | 5.19E-01 | 0.28  | 1.55E-01 |
| RP11-547D13.1 | 0.26  | 1.85E-01 | -0.28 | 1.55E-01 |
| RPL9P7        | 0.06  | 7.71E-01 | -0.28 | 1.55E-01 |
| RPSAP9        | 0.01  | 9.77E-01 | 0.28  | 1.55E-01 |
| TTYH3         | 0.10  | 6.16E-01 | 0.28  | 1.55E-01 |
| XLOC_014355   | -0.15 | 4.49E-01 | -0.28 | 1.55E-01 |
| ZFHX4         | -0.03 | 8.70E-01 | 0.28  | 1.55E-01 |
| AL133245.2    | 0.01  | 9.50E-01 | -0.28 | 1.56E-01 |

|                       |       |          |       |          |
|-----------------------|-------|----------|-------|----------|
| <b>C17orf105</b>      | -0.21 | 2.78E-01 | 0.28  | 1.56E-01 |
| <b>C1orf54</b>        | 0.01  | 9.68E-01 | 0.28  | 1.56E-01 |
| <b>MIR125B1</b>       | -0.11 | 5.63E-01 | -0.28 | 1.56E-01 |
| <b>RNU1-120P</b>      | 0.15  | 4.60E-01 | 0.28  | 1.56E-01 |
| <b>RP5-1021I20.6</b>  | 0.11  | 5.60E-01 | -0.28 | 1.56E-01 |
| <b>SIGLEC10</b>       | 0.26  | 1.78E-01 | 0.28  | 1.56E-01 |
| <b>TTC9</b>           | 0.30  | 1.25E-01 | 0.28  | 1.56E-01 |
| <b>AC006372.5</b>     | 0.07  | 7.23E-01 | -0.28 | 1.56E-01 |
| <b>ADCY2</b>          | -0.36 | 6.37E-02 | -0.28 | 1.56E-01 |
| <b>RFX1</b>           | -0.26 | 1.79E-01 | -0.28 | 1.56E-01 |
| <b>RP11-340F14.6</b>  | 0.05  | 7.93E-01 | -0.28 | 1.56E-01 |
| <b>RP11-363E6.4</b>   | -0.16 | 4.24E-01 | -0.28 | 1.56E-01 |
| <b>RP11-706O15.3</b>  | -0.02 | 9.08E-01 | -0.28 | 1.56E-01 |
| <b>RP3-486I3.7</b>    | -0.02 | 9.02E-01 | -0.28 | 1.56E-01 |
| <b>SLC30A10</b>       | -0.28 | 1.53E-01 | -0.28 | 1.56E-01 |
| <b>TTC30A</b>         | 0.21  | 2.78E-01 | -0.28 | 1.56E-01 |
| <b>UFM1</b>           | -0.05 | 7.85E-01 | -0.28 | 1.56E-01 |
| <b>PIH1D2</b>         | -0.04 | 8.29E-01 | 0.28  | 1.56E-01 |
| <b>RP3-405J10.4</b>   | -0.14 | 4.73E-01 | 0.28  | 1.56E-01 |
| <b>VDAC1P4</b>        | 0.03  | 8.68E-01 | 0.28  | 1.56E-01 |
| <b>ZC3HAV1</b>        | 0.32  | 9.84E-02 | 0.28  | 1.56E-01 |
| <b>C11orf91</b>       | 0.04  | 8.21E-01 | -0.28 | 1.57E-01 |
| <b>COMMD2</b>         | 0.07  | 7.29E-01 | -0.28 | 1.57E-01 |
| <b>DHX29</b>          | 0.06  | 7.69E-01 | -0.28 | 1.57E-01 |
| <b>FAM171A1</b>       | -0.27 | 1.72E-01 | 0.28  | 1.57E-01 |
| <b>FAM45B</b>         | 0.09  | 6.58E-01 | 0.28  | 1.57E-01 |
| <b>G5264</b>          | -0.29 | 1.30E-01 | -0.28 | 1.57E-01 |
| <b>GAPDHP62</b>       | 0.10  | 6.11E-01 | -0.28 | 1.57E-01 |
| <b>KDM6A</b>          | -0.43 | 2.21E-02 | -0.28 | 1.57E-01 |
| <b>LDLRAD3</b>        | -0.22 | 2.58E-01 | 0.28  | 1.57E-01 |
| <b>PLXNA2</b>         | -0.22 | 2.53E-01 | -0.28 | 1.57E-01 |
| <b>RBCK1</b>          | 0.15  | 4.41E-01 | 0.28  | 1.57E-01 |
| <b>RBP1</b>           | 0.15  | 4.48E-01 | -0.28 | 1.57E-01 |
| <b>RN7SL637P</b>      | 0.02  | 9.03E-01 | 0.28  | 1.57E-01 |
| <b>SBK1</b>           | -0.32 | 1.01E-01 | -0.28 | 1.57E-01 |
| <b>ZCCHC17</b>        | 0.19  | 3.44E-01 | 0.28  | 1.57E-01 |
| <b>AC072062.1</b>     | 0.04  | 8.42E-01 | -0.28 | 1.57E-01 |
| <b>CBWD2</b>          | -0.16 | 4.15E-01 | -0.28 | 1.57E-01 |
| <b>CHRD12</b>         | 0.14  | 4.91E-01 | -0.28 | 1.57E-01 |
| <b>COTL1</b>          | 0.31  | 1.14E-01 | 0.28  | 1.57E-01 |
| <b>MIR4427</b>        | 0.02  | 9.32E-01 | 0.28  | 1.57E-01 |
| <b>NAP1L5</b>         | 0.03  | 8.70E-01 | -0.28 | 1.57E-01 |
| <b>RP11-1260E13.4</b> | 0.25  | 2.06E-01 | 0.28  | 1.57E-01 |
| <b>RP11-147L13.2</b>  | 0.32  | 1.02E-01 | -0.28 | 1.57E-01 |
| <b>RP11-21M24.2</b>   | -0.17 | 3.86E-01 | 0.28  | 1.57E-01 |
| <b>RP11-2B6.3</b>     | -0.02 | 9.28E-01 | 0.28  | 1.57E-01 |
| <b>RP11-453E17.4</b>  | -0.07 | 7.35E-01 | -0.28 | 1.57E-01 |

|                |       |          |       |          |
|----------------|-------|----------|-------|----------|
| RP11-467J12.2  | -0.06 | 7.72E-01 | -0.28 | 1.57E-01 |
| RP11-767C1.2   | 0.04  | 8.49E-01 | -0.28 | 1.57E-01 |
| ZNF814         | 0.34  | 7.59E-02 | -0.28 | 1.57E-01 |
| ZNRF3-AS1      | 0.08  | 6.97E-01 | -0.28 | 1.57E-01 |
| AC004985.12    | 0.05  | 8.02E-01 | -0.28 | 1.58E-01 |
| AC010883.5     | -0.05 | 7.99E-01 | -0.28 | 1.58E-01 |
| ADAMTS5        | -0.19 | 3.36E-01 | 0.28  | 1.58E-01 |
| CTD-2383M3.1   | 0.12  | 5.42E-01 | -0.28 | 1.58E-01 |
| FOXP1          | 0.12  | 5.57E-01 | 0.28  | 1.58E-01 |
| G28010         | -0.23 | 2.44E-01 | -0.28 | 1.58E-01 |
| HAND2-AS1      | -0.04 | 8.31E-01 | -0.28 | 1.58E-01 |
| IGSF3          | 0.25  | 2.07E-01 | 0.28  | 1.58E-01 |
| MGST2          | 0.17  | 3.93E-01 | 0.28  | 1.58E-01 |
| RAB38          | 0.31  | 1.07E-01 | 0.28  | 1.58E-01 |
| RNU6-1025P     | 0.06  | 7.50E-01 | 0.28  | 1.58E-01 |
| RP11-615I2.1   | 0.11  | 5.78E-01 | -0.28 | 1.58E-01 |
| RP11-753H16.5  | 0.14  | 4.68E-01 | 0.28  | 1.58E-01 |
| SUN1           | -0.51 | 5.62E-03 | -0.28 | 1.58E-01 |
| THOC2          | -0.04 | 8.51E-01 | -0.28 | 1.58E-01 |
| TMEM8A         | 0.01  | 9.78E-01 | 0.28  | 1.58E-01 |
| AC010980.2     | -0.43 | 2.31E-02 | 0.28  | 1.58E-01 |
| AC067956.1     | 0.35  | 7.05E-02 | 0.28  | 1.58E-01 |
| ATP11C         | 0.11  | 5.82E-01 | -0.28 | 1.58E-01 |
| C5AR2          | 0.14  | 4.85E-01 | 0.28  | 1.58E-01 |
| CORO7          | 0.27  | 1.62E-01 | 0.28  | 1.58E-01 |
| CTC-490E21.10  | -0.08 | 6.98E-01 | 0.28  | 1.58E-01 |
| CXCL17         | 0.24  | 2.19E-01 | 0.28  | 1.58E-01 |
| FAM85B         | -0.13 | 5.06E-01 | 0.28  | 1.58E-01 |
| FKBP14         | -0.06 | 7.62E-01 | -0.28 | 1.58E-01 |
| MSL1           | -0.13 | 5.03E-01 | -0.28 | 1.58E-01 |
| NBAS           | -0.13 | 4.94E-01 | -0.28 | 1.58E-01 |
| RNU1-51P       | -0.11 | 5.65E-01 | 0.28  | 1.58E-01 |
| RNU6-689P      | -0.09 | 6.56E-01 | -0.28 | 1.58E-01 |
| RP11-1069G10.1 | -0.04 | 8.46E-01 | -0.28 | 1.58E-01 |
| RP11-119H12.4  | -0.35 | 6.41E-02 | -0.28 | 1.58E-01 |
| RP11-266L9.3   | -0.10 | 6.01E-01 | -0.28 | 1.58E-01 |
| RP11-2C24.3    | 0.12  | 5.28E-01 | -0.28 | 1.58E-01 |
| RP11-413B19.2  | -0.27 | 1.71E-01 | -0.28 | 1.58E-01 |
| RP11-502H18.2  | 0.23  | 2.44E-01 | 0.28  | 1.58E-01 |
| RP11-770J1.3   | -0.21 | 2.85E-01 | 0.28  | 1.58E-01 |
| UGT2B7         | -0.17 | 3.85E-01 | -0.28 | 1.58E-01 |
| UPF3BP1        | -0.09 | 6.32E-01 | 0.28  | 1.58E-01 |
| XLOC_007865    | 0.14  | 4.74E-01 | -0.28 | 1.58E-01 |
| ZNF471         | -0.04 | 8.38E-01 | -0.28 | 1.58E-01 |
| AC012066.1     | -0.28 | 1.48E-01 | 0.28  | 1.58E-01 |
| CTB-193M12.5   | 0.08  | 6.68E-01 | 0.28  | 1.58E-01 |
| HEXA-AS1       | 0.00  | 9.97E-01 | 0.28  | 1.58E-01 |

|               |       |          |       |          |
|---------------|-------|----------|-------|----------|
| HSD3BP1       | -0.35 | 6.57E-02 | 0.28  | 1.58E-01 |
| LINC01181     | 0.02  | 9.25E-01 | 0.28  | 1.58E-01 |
| LINC01215     | 0.18  | 3.61E-01 | 0.28  | 1.58E-01 |
| PKIA          | 0.47  | 1.20E-02 | 0.28  | 1.58E-01 |
| POM121        | 0.38  | 4.81E-02 | 0.28  | 1.58E-01 |
| RP11-84C10.2  | -0.04 | 8.29E-01 | 0.28  | 1.58E-01 |
| SMG6          | 0.29  | 1.29E-01 | 0.28  | 1.58E-01 |
| STRIP1        | 0.26  | 1.73E-01 | 0.28  | 1.58E-01 |
| TTC39C-AS1    | 0.00  | 9.98E-01 | 0.28  | 1.58E-01 |
| TYK2          | 0.01  | 9.71E-01 | 0.28  | 1.58E-01 |
| XLOC_002554   | 0.38  | 4.56E-02 | 0.28  | 1.58E-01 |
| AGGF1P1       | -0.04 | 8.46E-01 | -0.28 | 1.58E-01 |
| CTSE          | 0.01  | 9.58E-01 | -0.28 | 1.58E-01 |
| ERBB2IP       | -0.27 | 1.68E-01 | -0.28 | 1.58E-01 |
| POLQ          | -0.05 | 8.07E-01 | -0.28 | 1.58E-01 |
| RP11-203H19.2 | -0.23 | 2.44E-01 | -0.28 | 1.58E-01 |
| ARHGAP26-IT1  | -0.10 | 5.99E-01 | 0.28  | 1.59E-01 |
| COQ5          | 0.05  | 8.03E-01 | 0.28  | 1.59E-01 |
| CTD-2145A24.4 | 0.29  | 1.35E-01 | -0.28 | 1.59E-01 |
| LTB           | 0.27  | 1.69E-01 | 0.28  | 1.59E-01 |
| RNU4-8P       | -0.07 | 7.36E-01 | -0.28 | 1.59E-01 |
| SNTG2         | -0.49 | 7.91E-03 | 0.28  | 1.59E-01 |
| SRRM4         | -0.17 | 3.82E-01 | -0.28 | 1.59E-01 |
| AP000302.58   | 0.05  | 8.09E-01 | 0.28  | 1.59E-01 |
| CSF2          | 0.25  | 1.94E-01 | 0.28  | 1.59E-01 |
| ESRP2         | 0.17  | 4.00E-01 | 0.28  | 1.59E-01 |
| HOXB2         | -0.09 | 6.67E-01 | 0.28  | 1.59E-01 |
| RP11-165M1.2  | -0.17 | 3.93E-01 | -0.28 | 1.59E-01 |
| RP11-455O6.5  | -0.03 | 8.80E-01 | -0.28 | 1.59E-01 |
| RP11-701H24.7 | 0.13  | 5.26E-01 | -0.28 | 1.59E-01 |
| RP4-814D15.2  | -0.25 | 1.92E-01 | -0.28 | 1.59E-01 |
| SEC14L1P1     | -0.07 | 7.15E-01 | -0.28 | 1.59E-01 |
| STARD3        | -0.04 | 8.24E-01 | 0.28  | 1.59E-01 |
| XLOC_007999   | 0.49  | 8.62E-03 | -0.28 | 1.59E-01 |
| ZNRF2P2       | 0.15  | 4.47E-01 | 0.28  | 1.59E-01 |
| CD164L2       | 0.06  | 7.58E-01 | 0.28  | 1.60E-01 |
| CTC-543D15.8  | 0.17  | 3.96E-01 | -0.28 | 1.60E-01 |
| CTD-2020K17.4 | -0.04 | 8.23E-01 | 0.28  | 1.60E-01 |
| DIO2-AS1      | 0.26  | 1.77E-01 | -0.28 | 1.60E-01 |
| FAM53B        | 0.24  | 2.16E-01 | 0.28  | 1.60E-01 |
| GIMAP6        | -0.09 | 6.62E-01 | 0.28  | 1.60E-01 |
| PLK2          | 0.22  | 2.52E-01 | 0.28  | 1.60E-01 |
| RP11-469H8.6  | -0.04 | 8.27E-01 | 0.28  | 1.60E-01 |
| RP11-486P11.1 | -0.28 | 1.48E-01 | -0.28 | 1.60E-01 |
| RP11-587D21.1 | -0.14 | 4.84E-01 | -0.28 | 1.60E-01 |
| SMIM11B       | -0.19 | 3.24E-01 | -0.28 | 1.60E-01 |
| SRR           | -0.06 | 7.45E-01 | -0.28 | 1.60E-01 |

|               |       |          |       |          |
|---------------|-------|----------|-------|----------|
| VANGL2        | 0.26  | 1.83E-01 | 0.28  | 1.60E-01 |
| WWP1          | -0.11 | 5.85E-01 | -0.28 | 1.60E-01 |
| ZNF135        | -0.04 | 8.38E-01 | -0.28 | 1.60E-01 |
| C11orf45      | -0.17 | 3.93E-01 | 0.28  | 1.60E-01 |
| CADM3         | -0.32 | 1.02E-01 | -0.28 | 1.60E-01 |
| CRABP2        | 0.34  | 7.97E-02 | 0.28  | 1.60E-01 |
| CTD-2017C7.3  | -0.06 | 7.59E-01 | 0.28  | 1.60E-01 |
| CUBN          | -0.22 | 2.63E-01 | -0.28 | 1.60E-01 |
| G26935        | 0.05  | 8.11E-01 | 0.28  | 1.60E-01 |
| HPS1          | 0.04  | 8.25E-01 | 0.28  | 1.60E-01 |
| LINC01521     | 0.01  | 9.42E-01 | 0.28  | 1.60E-01 |
| NCF1C         | 0.00  | 9.98E-01 | 0.28  | 1.60E-01 |
| RNU6-593P     | 0.09  | 6.38E-01 | 0.28  | 1.60E-01 |
| RP11-227F19.5 | 0.10  | 5.98E-01 | 0.28  | 1.60E-01 |
| RP11-723O4.7  | -0.03 | 8.92E-01 | -0.28 | 1.60E-01 |
| SNORA37       | 0.19  | 3.38E-01 | 0.28  | 1.60E-01 |
| SUDS3         | 0.03  | 8.61E-01 | -0.28 | 1.60E-01 |
| XLOC_008619   | 0.19  | 3.41E-01 | -0.28 | 1.60E-01 |
| XLOC_008955   | -0.01 | 9.63E-01 | -0.28 | 1.60E-01 |
| AL355885.1    | -0.37 | 5.10E-02 | -0.28 | 1.61E-01 |
| ERBB4         | -0.11 | 5.71E-01 | -0.28 | 1.61E-01 |
| FAM174B       | 0.01  | 9.55E-01 | -0.28 | 1.61E-01 |
| FAP           | -0.17 | 3.76E-01 | 0.28  | 1.61E-01 |
| G6708         | 0.03  | 8.79E-01 | -0.28 | 1.61E-01 |
| IGLV1-51      | -0.13 | 5.14E-01 | 0.28  | 1.61E-01 |
| MGAT4EP       | 0.25  | 2.00E-01 | -0.28 | 1.61E-01 |
| PSG11         | 0.23  | 2.38E-01 | -0.28 | 1.61E-01 |
| RP11-350J20.9 | 0.20  | 3.07E-01 | -0.28 | 1.61E-01 |
| SUCLA2-AS1    | 0.18  | 3.66E-01 | 0.28  | 1.61E-01 |
| TEX11         | -0.42 | 2.72E-02 | 0.28  | 1.61E-01 |
| AC005329.7    | -0.14 | 4.79E-01 | 0.28  | 1.61E-01 |
| AC012358.8    | 0.15  | 4.51E-01 | 0.28  | 1.61E-01 |
| ADI1          | 0.19  | 3.42E-01 | 0.28  | 1.61E-01 |
| C4BPAP2       | 0.04  | 8.59E-01 | 0.28  | 1.61E-01 |
| CTD-2523D13.2 | 0.14  | 4.70E-01 | 0.28  | 1.61E-01 |
| FAM227A       | -0.38 | 4.54E-02 | -0.28 | 1.61E-01 |
| GYPB          | -0.27 | 1.60E-01 | -0.28 | 1.61E-01 |
| MORC3         | 0.24  | 2.28E-01 | 0.28  | 1.61E-01 |
| RABGEF1       | -0.01 | 9.47E-01 | 0.28  | 1.61E-01 |
| RP11-54O7.1   | 0.04  | 8.59E-01 | -0.28 | 1.61E-01 |
| RP11-94C24.13 | -0.29 | 1.33E-01 | -0.28 | 1.61E-01 |
| RPL21P122     | -0.07 | 7.20E-01 | -0.28 | 1.61E-01 |
| SERPINF2      | -0.01 | 9.46E-01 | 0.28  | 1.61E-01 |
| TATDN1P1      | 0.25  | 1.97E-01 | 0.28  | 1.61E-01 |
| VPS9D1-AS1    | 0.05  | 7.83E-01 | -0.28 | 1.61E-01 |
| AC011477.1    | 0.24  | 2.17E-01 | -0.28 | 1.62E-01 |
| CTD-2078B5.2  | -0.16 | 4.24E-01 | -0.28 | 1.62E-01 |

|                      |       |          |       |          |
|----------------------|-------|----------|-------|----------|
| <b>CTD-2286N8.2</b>  | 0.13  | 4.95E-01 | -0.28 | 1.62E-01 |
| <b>G31307</b>        | 0.14  | 4.75E-01 | 0.28  | 1.62E-01 |
| <b>GUSB</b>          | -0.03 | 8.95E-01 | 0.28  | 1.62E-01 |
| <b>ITGA3</b>         | 0.34  | 7.66E-02 | 0.28  | 1.62E-01 |
| <b>POLD4</b>         | -0.05 | 8.08E-01 | 0.28  | 1.62E-01 |
| <b>RP11-567F11.1</b> | 0.01  | 9.77E-01 | -0.28 | 1.62E-01 |
| <b>TIMM23B</b>       | 0.17  | 3.83E-01 | 0.28  | 1.62E-01 |
| <b>FTH1P2</b>        | -0.12 | 5.30E-01 | 0.28  | 1.62E-01 |
| <b>G33755</b>        | 0.08  | 6.96E-01 | 0.28  | 1.62E-01 |
| <b>GCSH</b>          | 0.15  | 4.40E-01 | 0.28  | 1.62E-01 |
| <b>RP11-289I10.2</b> | -0.10 | 6.01E-01 | 0.28  | 1.62E-01 |
| <b>TNFSF14</b>       | 0.36  | 6.13E-02 | 0.28  | 1.62E-01 |
| <b>AADA4L4</b>       | -0.13 | 5.01E-01 | -0.28 | 1.62E-01 |
| <b>CCDC172</b>       | -0.08 | 6.88E-01 | -0.28 | 1.62E-01 |
| <b>FLG-AS1</b>       | -0.28 | 1.52E-01 | -0.28 | 1.62E-01 |
| <b>G27476</b>        | 0.02  | 9.01E-01 | -0.28 | 1.62E-01 |
| <b>HNRNPA1P14</b>    | 0.01  | 9.43E-01 | -0.28 | 1.62E-01 |
| <b>KDM4C</b>         | -0.09 | 6.50E-01 | -0.28 | 1.62E-01 |
| <b>NAA35</b>         | 0.10  | 6.12E-01 | -0.28 | 1.62E-01 |
| <b>RGPD6</b>         | -0.41 | 3.10E-02 | -0.28 | 1.62E-01 |
| <b>RNU2-37P</b>      | 0.39  | 4.09E-02 | -0.28 | 1.62E-01 |
| <b>RP11-889L3.1</b>  | -0.08 | 6.71E-01 | -0.28 | 1.62E-01 |
| <b>THAP10</b>        | 0.02  | 9.39E-01 | -0.28 | 1.62E-01 |
| <b>XLOC_005050</b>   | 0.10  | 6.27E-01 | -0.28 | 1.62E-01 |
| <b>XLOC_008979</b>   | -0.02 | 9.31E-01 | -0.28 | 1.62E-01 |
| <b>ZDHC11B</b>       | -0.54 | 2.83E-03 | -0.28 | 1.62E-01 |
| <b>AC024475.1</b>    | 0.10  | 6.12E-01 | -0.28 | 1.63E-01 |
| <b>C1orf158</b>      | -0.04 | 8.43E-01 | -0.28 | 1.63E-01 |
| <b>CTC-448F2.4</b>   | -0.05 | 7.93E-01 | -0.28 | 1.63E-01 |
| <b>EIF2S2P2</b>      | 0.03  | 8.98E-01 | 0.28  | 1.63E-01 |
| <b>HS6ST2</b>        | 0.09  | 6.57E-01 | -0.28 | 1.63E-01 |
| <b>IL6R</b>          | 0.14  | 4.93E-01 | -0.28 | 1.63E-01 |
| <b>MFSD10</b>        | 0.43  | 2.31E-02 | 0.28  | 1.63E-01 |
| <b>NEDD4</b>         | 0.17  | 3.87E-01 | 0.28  | 1.63E-01 |
| <b>RP11-165D7.5</b>  | -0.05 | 8.16E-01 | 0.28  | 1.63E-01 |
| <b>RP11-424I19.2</b> | -0.04 | 8.29E-01 | -0.28 | 1.63E-01 |
| <b>RP11-508N12.2</b> | -0.05 | 7.92E-01 | 0.28  | 1.63E-01 |
| <b>RP11-588K22.2</b> | -0.43 | 2.10E-02 | 0.28  | 1.63E-01 |
| <b>SASH3</b>         | 0.13  | 5.24E-01 | 0.28  | 1.63E-01 |
| <b>SIRPG</b>         | 0.05  | 8.13E-01 | 0.28  | 1.63E-01 |
| <b>TMEM161A</b>      | 0.25  | 1.93E-01 | 0.28  | 1.63E-01 |
| <b>TMEM170B</b>      | -0.08 | 7.00E-01 | -0.28 | 1.63E-01 |
| <b>USF1P1</b>        | 0.09  | 6.59E-01 | 0.28  | 1.63E-01 |
| <b>USMG5P1</b>       | -0.17 | 3.93E-01 | 0.28  | 1.63E-01 |
| <b>AP000295.10</b>   | -0.14 | 4.88E-01 | -0.28 | 1.63E-01 |
| <b>CCL17</b>         | 0.14  | 4.64E-01 | 0.28  | 1.63E-01 |
| <b>CTD-2349P21.9</b> | 0.19  | 3.29E-01 | -0.28 | 1.63E-01 |

|               |       |          |       |          |
|---------------|-------|----------|-------|----------|
| CTLA4         | 0.18  | 3.69E-01 | 0.28  | 1.63E-01 |
| RP11-153M7.3  | 0.18  | 3.63E-01 | 0.28  | 1.63E-01 |
| SMG1P1        | -0.20 | 3.18E-01 | -0.28 | 1.63E-01 |
| TMEM191C      | -0.06 | 7.52E-01 | 0.28  | 1.63E-01 |
| XLOC_007971   | 0.21  | 2.94E-01 | -0.28 | 1.63E-01 |
| ZFAND5        | 0.25  | 1.99E-01 | 0.28  | 1.63E-01 |
| ZNF785        | 0.16  | 4.08E-01 | 0.28  | 1.63E-01 |
| DCDC2B        | 0.20  | 3.17E-01 | -0.28 | 1.64E-01 |
| JPH1          | 0.23  | 2.33E-01 | -0.28 | 1.64E-01 |
| KCNT2         | -0.29 | 1.32E-01 | -0.28 | 1.64E-01 |
| LRR37A2       | -0.02 | 9.11E-01 | -0.28 | 1.64E-01 |
| PRMT5-AS1     | -0.42 | 2.42E-02 | -0.28 | 1.64E-01 |
| RMDN2-AS1     | -0.15 | 4.34E-01 | -0.28 | 1.64E-01 |
| RP5-1048B16.1 | 0.03  | 8.97E-01 | -0.28 | 1.64E-01 |
| USP27X        | -0.32 | 1.02E-01 | -0.28 | 1.64E-01 |
| ZNF519        | -0.03 | 8.86E-01 | -0.28 | 1.64E-01 |
| C4orf3        | 0.00  | 9.86E-01 | 0.28  | 1.64E-01 |
| KCNRG         | 0.18  | 3.72E-01 | 0.28  | 1.64E-01 |
| MAP3K11       | 0.38  | 4.68E-02 | 0.28  | 1.64E-01 |
| NFE2L1        | 0.22  | 2.69E-01 | 0.28  | 1.64E-01 |
| RP1-120G22.11 | 0.10  | 6.03E-01 | 0.28  | 1.64E-01 |
| SLC25A53      | 0.10  | 6.16E-01 | 0.28  | 1.64E-01 |
| ZBTB7C        | 0.16  | 4.21E-01 | 0.28  | 1.64E-01 |
| AC020571.3    | 0.44  | 1.89E-02 | 0.28  | 1.64E-01 |
| ALDH1L2       | -0.48 | 8.92E-03 | 0.28  | 1.64E-01 |
| CTD-2256P15.4 | -0.01 | 9.44E-01 | -0.28 | 1.64E-01 |
| DBIL5P        | -0.13 | 5.01E-01 | -0.28 | 1.64E-01 |
| FAM185A       | -0.13 | 5.09E-01 | -0.28 | 1.64E-01 |
| G10252        | -0.09 | 6.55E-01 | -0.28 | 1.64E-01 |
| LINC00167     | -0.02 | 9.36E-01 | -0.28 | 1.64E-01 |
| LRR358        | 0.10  | 6.06E-01 | -0.28 | 1.64E-01 |
| RNU6-308P     | -0.08 | 6.85E-01 | -0.28 | 1.64E-01 |
| RP11-180P8.5  | -0.21 | 2.93E-01 | -0.28 | 1.64E-01 |
| RP11-320L11.2 | -0.05 | 8.09E-01 | 0.28  | 1.64E-01 |
| RP11-697N18.1 | -0.07 | 7.14E-01 | -0.28 | 1.64E-01 |
| SUPV3L1       | 0.27  | 1.57E-01 | -0.28 | 1.64E-01 |
| ZNF526        | 0.32  | 9.39E-02 | 0.28  | 1.64E-01 |
| AC087793.1    | 0.18  | 3.66E-01 | 0.28  | 1.65E-01 |
| ARHGEF4       | 0.03  | 8.99E-01 | 0.28  | 1.65E-01 |
| CTD-2308L22.1 | 0.29  | 1.33E-01 | 0.28  | 1.65E-01 |
| GNAI2         | 0.19  | 3.37E-01 | 0.28  | 1.65E-01 |
| INTS4         | -0.08 | 6.68E-01 | 0.28  | 1.65E-01 |
| LINC00961     | 0.09  | 6.40E-01 | -0.28 | 1.65E-01 |
| PIK3IP1-AS1   | 0.01  | 9.64E-01 | -0.28 | 1.65E-01 |
| RAD50         | 0.12  | 5.54E-01 | 0.28  | 1.65E-01 |
| RBBP8         | 0.21  | 2.85E-01 | 0.28  | 1.65E-01 |
| RN7SKP158     | -0.21 | 2.93E-01 | 0.28  | 1.65E-01 |

|                      |       |          |       |          |
|----------------------|-------|----------|-------|----------|
| <b>RNA5SP165</b>     | 0.08  | 6.95E-01 | -0.28 | 1.65E-01 |
| <b>RNU6-911P</b>     | -0.16 | 4.20E-01 | -0.28 | 1.65E-01 |
| <b>SLC35G5</b>       | -0.22 | 2.59E-01 | 0.28  | 1.65E-01 |
| <b>AC010890.1</b>    | -0.04 | 8.32E-01 | 0.27  | 1.65E-01 |
| <b>AL591377.1</b>    | 0.05  | 8.12E-01 | 0.27  | 1.65E-01 |
| <b>ATP2A3</b>        | 0.40  | 3.51E-02 | 0.27  | 1.65E-01 |
| <b>FOXK1</b>         | 0.23  | 2.48E-01 | 0.27  | 1.65E-01 |
| <b>G18966</b>        | 0.22  | 2.60E-01 | 0.27  | 1.65E-01 |
| <b>GON4L</b>         | -0.09 | 6.34E-01 | 0.27  | 1.65E-01 |
| <b>LRRC6</b>         | -0.10 | 6.18E-01 | 0.27  | 1.65E-01 |
| <b>MAOB</b>          | -0.19 | 3.25E-01 | 0.27  | 1.65E-01 |
| <b>NCCRP1</b>        | 0.24  | 2.19E-01 | 0.27  | 1.65E-01 |
| <b>RAP2B</b>         | 0.38  | 4.76E-02 | 0.27  | 1.65E-01 |
| <b>VMO1</b>          | 0.34  | 7.66E-02 | 0.27  | 1.65E-01 |
| <b>ACTR10</b>        | 0.17  | 3.86E-01 | -0.27 | 1.65E-01 |
| <b>CASKIN1</b>       | -0.20 | 2.97E-01 | -0.27 | 1.65E-01 |
| <b>COLEC12</b>       | -0.18 | 3.66E-01 | -0.27 | 1.65E-01 |
| <b>KMT2E</b>         | -0.32 | 9.65E-02 | -0.27 | 1.65E-01 |
| <b>OXR1</b>          | -0.13 | 5.14E-01 | -0.27 | 1.65E-01 |
| <b>RNU6-789P</b>     | -0.03 | 8.91E-01 | -0.27 | 1.65E-01 |
| <b>TMIE</b>          | 0.13  | 5.13E-01 | -0.27 | 1.65E-01 |
| <b>BTBD9</b>         | 0.16  | 4.07E-01 | -0.27 | 1.66E-01 |
| <b>CTC-451P13.1</b>  | -0.12 | 5.49E-01 | -0.27 | 1.66E-01 |
| <b>GBF1</b>          | -0.19 | 3.39E-01 | 0.27  | 1.66E-01 |
| <b>MEI1</b>          | 0.18  | 3.70E-01 | 0.27  | 1.66E-01 |
| <b>MRE11A</b>        | -0.23 | 2.37E-01 | -0.27 | 1.66E-01 |
| <b>NEK3</b>          | -0.21 | 2.88E-01 | -0.27 | 1.66E-01 |
| <b>OSCAR</b>         | 0.18  | 3.59E-01 | 0.27  | 1.66E-01 |
| <b>RNU6-5P</b>       | -0.27 | 1.59E-01 | 0.27  | 1.66E-01 |
| <b>RP1-71H24.1</b>   | 0.13  | 5.10E-01 | 0.27  | 1.66E-01 |
| <b>RP11-35J10.7</b>  | -0.22 | 2.52E-01 | -0.27 | 1.66E-01 |
| <b>RP11-379F4.1</b>  | -0.12 | 5.44E-01 | -0.27 | 1.66E-01 |
| <b>RP11-680C21.1</b> | 0.32  | 9.53E-02 | 0.27  | 1.66E-01 |
| <b>RP11-847H18.3</b> | -0.06 | 7.45E-01 | -0.27 | 1.66E-01 |
| <b>SCML1</b>         | -0.06 | 7.44E-01 | -0.27 | 1.66E-01 |
| <b>SLC1A7</b>        | -0.23 | 2.35E-01 | 0.27  | 1.66E-01 |
| <b>SNORA16B</b>      | -0.07 | 7.42E-01 | -0.27 | 1.66E-01 |
| <b>TTLL5</b>         | -0.22 | 2.60E-01 | 0.27  | 1.66E-01 |
| <b>USP12</b>         | -0.20 | 3.07E-01 | -0.27 | 1.66E-01 |
| <b>XLOC_000633</b>   | 0.08  | 6.78E-01 | -0.27 | 1.66E-01 |
| <b>AC105049.1</b>    | -0.04 | 8.52E-01 | 0.27  | 1.66E-01 |
| <b>BCAP31P2</b>      | 0.22  | 2.65E-01 | 0.27  | 1.66E-01 |
| <b>CH17-437K3.1</b>  | 0.05  | 7.89E-01 | 0.27  | 1.66E-01 |
| <b>COG6</b>          | -0.08 | 6.82E-01 | -0.27 | 1.66E-01 |
| <b>CYCSP52</b>       | -0.28 | 1.47E-01 | -0.27 | 1.66E-01 |
| <b>FADS2</b>         | -0.27 | 1.63E-01 | -0.27 | 1.66E-01 |
| <b>FAM151B</b>       | 0.08  | 6.89E-01 | 0.27  | 1.66E-01 |



|                 |       |          |       |          |
|-----------------|-------|----------|-------|----------|
| HMGB1P14        | -0.05 | 8.00E-01 | -0.27 | 1.66E-01 |
| IFIT1           | 0.28  | 1.51E-01 | 0.27  | 1.66E-01 |
| OAS3            | 0.44  | 2.02E-02 | 0.27  | 1.66E-01 |
| RNA5SP429       | 0.01  | 9.66E-01 | 0.27  | 1.66E-01 |
| RNU6-1275P      | 0.06  | 7.48E-01 | -0.27 | 1.66E-01 |
| RP11-113C12.4   | -0.20 | 3.13E-01 | -0.27 | 1.66E-01 |
| RP11-40C11.2    | -0.20 | 3.11E-01 | -0.27 | 1.66E-01 |
| RP11-575H3.1    | -0.22 | 2.58E-01 | -0.27 | 1.66E-01 |
| RP11-680A11.5   | 0.00  | 9.86E-01 | 0.27  | 1.66E-01 |
| SGPP2           | 0.10  | 6.17E-01 | 0.27  | 1.66E-01 |
| VPS39           | 0.00  | 9.88E-01 | 0.27  | 1.66E-01 |
| XLOC_010601     | 0.04  | 8.44E-01 | -0.27 | 1.66E-01 |
| Xbac-BPG252P9.1 | 0.13  | 5.17E-01 | -0.27 | 1.66E-01 |
| ZNF518B         | 0.47  | 1.17E-02 | 0.27  | 1.66E-01 |
| CBY1            | 0.22  | 2.66E-01 | 0.27  | 1.67E-01 |
| IL2RA           | 0.16  | 4.16E-01 | 0.27  | 1.67E-01 |
| REEP4           | 0.06  | 7.43E-01 | 0.27  | 1.67E-01 |
| RP11-570L15.2   | 0.02  | 9.17E-01 | 0.27  | 1.67E-01 |
| RP5-940J5.3     | -0.08 | 6.70E-01 | 0.27  | 1.67E-01 |
| CTB-58E17.2     | 0.19  | 3.24E-01 | -0.27 | 1.67E-01 |
| DPRXP1          | 0.28  | 1.49E-01 | -0.27 | 1.67E-01 |
| IGKV6-21        | -0.08 | 6.74E-01 | -0.27 | 1.67E-01 |
| MT4             | -0.21 | 2.95E-01 | -0.27 | 1.67E-01 |
| OBSCN           | 0.23  | 2.44E-01 | -0.27 | 1.67E-01 |
| RHOBTB1         | -0.26 | 1.78E-01 | -0.27 | 1.67E-01 |
| AC096921.2      | -0.07 | 7.12E-01 | -0.27 | 1.67E-01 |
| FAM89B          | 0.04  | 8.58E-01 | 0.27  | 1.67E-01 |
| G32150          | 0.06  | 7.60E-01 | -0.27 | 1.67E-01 |
| NLGN1           | 0.01  | 9.54E-01 | -0.27 | 1.67E-01 |
| NPAS2           | 0.05  | 8.15E-01 | 0.27  | 1.67E-01 |
| PTEN            | 0.09  | 6.54E-01 | 0.27  | 1.67E-01 |
| RP11-18C24.8    | 0.07  | 7.33E-01 | -0.27 | 1.67E-01 |
| RP11-252K23.1   | -0.03 | 8.98E-01 | -0.27 | 1.67E-01 |
| RP11-408O19.5   | -0.16 | 4.07E-01 | -0.27 | 1.67E-01 |
| TESC            | -0.08 | 7.01E-01 | 0.27  | 1.67E-01 |
| WNT10A          | 0.21  | 2.91E-01 | 0.27  | 1.67E-01 |
| ZNF568          | 0.09  | 6.62E-01 | -0.27 | 1.67E-01 |
| AKAP6           | 0.25  | 2.02E-01 | 0.27  | 1.68E-01 |
| ANKFY1          | 0.02  | 9.24E-01 | 0.27  | 1.68E-01 |
| BMP7            | -0.04 | 8.35E-01 | -0.27 | 1.68E-01 |
| BTBD9-AS1       | 0.13  | 5.25E-01 | -0.27 | 1.68E-01 |
| CUL5            | 0.18  | 3.70E-01 | -0.27 | 1.68E-01 |
| GSTT1           | -0.24 | 2.22E-01 | 0.27  | 1.68E-01 |
| LINC01364       | -0.06 | 7.81E-01 | -0.27 | 1.68E-01 |
| NUDT18          | 0.01  | 9.50E-01 | 0.27  | 1.68E-01 |
| PKN2            | -0.08 | 7.02E-01 | -0.27 | 1.68E-01 |
| PLSCR2          | 0.11  | 5.94E-01 | 0.27  | 1.68E-01 |

|                       |       |          |       |          |
|-----------------------|-------|----------|-------|----------|
| <b>RP11-298D21.1</b>  | 0.14  | 4.64E-01 | 0.27  | 1.68E-01 |
| <b>SLC16A6P1</b>      | -0.09 | 6.63E-01 | -0.27 | 1.68E-01 |
| <b>SYNGR3</b>         | -0.15 | 4.44E-01 | -0.27 | 1.68E-01 |
| <b>TTC31</b>          | -0.04 | 8.40E-01 | 0.27  | 1.68E-01 |
| <b>Z98049.1</b>       | -0.20 | 2.98E-01 | 0.27  | 1.68E-01 |
| <b>AXDND1</b>         | -0.15 | 4.37E-01 | -0.27 | 1.68E-01 |
| <b>C6orf222</b>       | -0.40 | 3.41E-02 | -0.27 | 1.68E-01 |
| <b>CTD-2525P14.5</b>  | -0.11 | 5.60E-01 | -0.27 | 1.68E-01 |
| <b>G35257</b>         | -0.12 | 5.33E-01 | 0.27  | 1.68E-01 |
| <b>KIT</b>            | -0.40 | 3.66E-02 | -0.27 | 1.68E-01 |
| <b>NBEAL2</b>         | 0.09  | 6.42E-01 | 0.27  | 1.68E-01 |
| <b>PCAT19</b>         | -0.01 | 9.64E-01 | 0.27  | 1.68E-01 |
| <b>PDZRN3</b>         | 0.22  | 2.65E-01 | -0.27 | 1.68E-01 |
| <b>PLD1</b>           | -0.06 | 7.62E-01 | 0.27  | 1.68E-01 |
| <b>PRR5L</b>          | 0.39  | 4.14E-02 | 0.27  | 1.68E-01 |
| <b>RNA5SP294</b>      | 0.28  | 1.53E-01 | 0.27  | 1.68E-01 |
| <b>RP11-212F11.1</b>  | -0.01 | 9.57E-01 | -0.27 | 1.68E-01 |
| <b>RP11-418J17.3</b>  | 0.02  | 9.08E-01 | -0.27 | 1.68E-01 |
| <b>RPL26P19</b>       | -0.08 | 6.93E-01 | 0.27  | 1.68E-01 |
| <b>BRD7</b>           | -0.17 | 3.74E-01 | -0.27 | 1.69E-01 |
| <b>CMA1</b>           | -0.25 | 1.92E-01 | -0.27 | 1.69E-01 |
| <b>HMGB1</b>          | -0.04 | 8.44E-01 | -0.27 | 1.69E-01 |
| <b>PRKAG2</b>         | -0.16 | 4.14E-01 | -0.27 | 1.69E-01 |
| <b>RP11-150O12.3</b>  | -0.13 | 5.15E-01 | -0.27 | 1.69E-01 |
| <b>RP11-203F10.6</b>  | -0.07 | 7.41E-01 | -0.27 | 1.69E-01 |
| <b>RP11-444E17.6</b>  | 0.07  | 7.12E-01 | -0.27 | 1.69E-01 |
| <b>TDRD15</b>         | 0.08  | 6.93E-01 | -0.27 | 1.69E-01 |
| <b>TUBB8P2</b>        | 0.27  | 1.64E-01 | -0.27 | 1.69E-01 |
| <b>ZNF793</b>         | -0.12 | 5.29E-01 | -0.27 | 1.69E-01 |
| <b>AC009302.2</b>     | 0.22  | 2.56E-01 | 0.27  | 1.69E-01 |
| <b>LMCD1-AS1</b>      | -0.40 | 3.39E-02 | 0.27  | 1.69E-01 |
| <b>PPP1R16B</b>       | 0.27  | 1.61E-01 | 0.27  | 1.69E-01 |
| <b>RP11-109N23.1</b>  | -0.07 | 7.39E-01 | 0.27  | 1.69E-01 |
| <b>RP11-477N3.1</b>   | -0.22 | 2.59E-01 | 0.27  | 1.69E-01 |
| <b>RP11-576C2.1</b>   | 0.25  | 2.01E-01 | 0.27  | 1.69E-01 |
| <b>TMEM26</b>         | 0.10  | 6.20E-01 | 0.27  | 1.69E-01 |
| <b>ZNRF1</b>          | 0.14  | 4.74E-01 | 0.27  | 1.69E-01 |
| <b>AC010226.4</b>     | -0.08 | 6.85E-01 | -0.27 | 1.69E-01 |
| <b>FFAR4</b>          | 0.17  | 3.91E-01 | 0.27  | 1.69E-01 |
| <b>NCK2</b>           | 0.08  | 7.01E-01 | 0.27  | 1.69E-01 |
| <b>RN7SL738P</b>      | -0.19 | 3.46E-01 | 0.27  | 1.69E-01 |
| <b>RP11-1198D22.1</b> | 0.20  | 3.14E-01 | 0.27  | 1.69E-01 |
| <b>RP11-417L19.6</b>  | -0.08 | 6.88E-01 | -0.27 | 1.69E-01 |
| <b>TMED7</b>          | 0.12  | 5.35E-01 | -0.27 | 1.69E-01 |
| <b>WNT7A</b>          | -0.24 | 2.16E-01 | 0.27  | 1.69E-01 |
| <b>AL357115.1</b>     | -0.33 | 8.42E-02 | 0.27  | 1.70E-01 |
| <b>ALKBH8</b>         | -0.02 | 9.34E-01 | -0.27 | 1.70E-01 |

|               |       |          |       |          |
|---------------|-------|----------|-------|----------|
| ARL11         | 0.32  | 1.02E-01 | 0.27  | 1.70E-01 |
| ARMCX1        | -0.21 | 2.95E-01 | -0.27 | 1.70E-01 |
| CD48          | 0.01  | 9.59E-01 | 0.27  | 1.70E-01 |
| DPPA2P4       | 0.04  | 8.56E-01 | 0.27  | 1.70E-01 |
| FOXCUT        | 0.08  | 7.03E-01 | -0.27 | 1.70E-01 |
| GPATCH11      | -0.12 | 5.48E-01 | -0.27 | 1.70E-01 |
| MAGI2-AS3     | -0.32 | 9.96E-02 | -0.27 | 1.70E-01 |
| MPHOSPH8      | 0.08  | 6.69E-01 | 0.27  | 1.70E-01 |
| NUDT16L1      | -0.01 | 9.42E-01 | 0.27  | 1.70E-01 |
| PLAG1         | -0.29 | 1.35E-01 | -0.27 | 1.70E-01 |
| PLEKHG6       | -0.35 | 6.84E-02 | -0.27 | 1.70E-01 |
| RP11-164N3.2  | 0.03  | 8.86E-01 | -0.27 | 1.70E-01 |
| RP11-195F19.5 | 0.04  | 8.27E-01 | 0.27  | 1.70E-01 |
| RP11-789C17.1 | 0.05  | 8.02E-01 | -0.27 | 1.70E-01 |
| STAG3L4       | 0.25  | 2.08E-01 | -0.27 | 1.70E-01 |
| STAT2         | 0.27  | 1.65E-01 | 0.27  | 1.70E-01 |
| CKAP2P1       | 0.03  | 8.87E-01 | -0.27 | 1.70E-01 |
| CTD-2537I9.12 | 0.03  | 8.62E-01 | -0.27 | 1.70E-01 |
| DUTP6         | -0.37 | 5.31E-02 | -0.27 | 1.70E-01 |
| ERVFRD-1      | 0.10  | 5.99E-01 | -0.27 | 1.70E-01 |
| G3632         | -0.13 | 5.02E-01 | -0.27 | 1.70E-01 |
| G40005        | -0.17 | 3.79E-01 | -0.27 | 1.70E-01 |
| MAT2B         | 0.11  | 5.92E-01 | 0.27  | 1.70E-01 |
| OPLAH         | 0.07  | 7.21E-01 | 0.27  | 1.70E-01 |
| PRKAG3        | -0.35 | 6.52E-02 | 0.27  | 1.70E-01 |
| RP11-151N17.1 | 0.18  | 3.69E-01 | 0.27  | 1.70E-01 |
| RP11-307C18.1 | -0.15 | 4.40E-01 | -0.27 | 1.70E-01 |
| RP11-609D21.3 | 0.06  | 7.54E-01 | 0.27  | 1.70E-01 |
| RP11-820I16.3 | -0.05 | 7.87E-01 | -0.27 | 1.70E-01 |
| SP7           | 0.19  | 3.45E-01 | 0.27  | 1.70E-01 |
| TMEM132A      | 0.39  | 4.21E-02 | 0.27  | 1.70E-01 |
| WASF1         | 0.06  | 7.78E-01 | 0.27  | 1.70E-01 |
| YWHAQP6       | -0.16 | 4.30E-01 | -0.27 | 1.70E-01 |
| ZNF404        | 0.00  | 9.86E-01 | -0.27 | 1.70E-01 |
| CTB-102L5.7   | -0.17 | 3.99E-01 | 0.27  | 1.71E-01 |
| EXOC3-AS1     | 0.13  | 4.93E-01 | 0.27  | 1.71E-01 |
| G28332        | 0.28  | 1.42E-01 | 0.27  | 1.71E-01 |
| G9801         | -0.35 | 6.84E-02 | -0.27 | 1.71E-01 |
| GPSM1         | 0.25  | 2.03E-01 | 0.27  | 1.71E-01 |
| HAS1          | -0.06 | 7.43E-01 | -0.27 | 1.71E-01 |
| LRP6          | -0.20 | 3.13E-01 | -0.27 | 1.71E-01 |
| NOL3          | -0.14 | 4.81E-01 | 0.27  | 1.71E-01 |
| RN7SL844P     | -0.02 | 9.12E-01 | -0.27 | 1.71E-01 |
| RNU6-1079P    | -0.14 | 4.69E-01 | 0.27  | 1.71E-01 |
| RNU6-1280P    | -0.02 | 9.23E-01 | -0.27 | 1.71E-01 |
| RP11-177H13.2 | -0.34 | 7.54E-02 | 0.27  | 1.71E-01 |
| RP11-400K9.4  | 0.29  | 1.28E-01 | 0.27  | 1.71E-01 |

|                      |       |          |       |          |
|----------------------|-------|----------|-------|----------|
| <b>RP11-500M8.4</b>  | -0.30 | 1.20E-01 | -0.27 | 1.71E-01 |
| <b>RP5-1120P11.3</b> | -0.10 | 6.14E-01 | -0.27 | 1.71E-01 |
| <b>RPL37P3</b>       | -0.16 | 4.24E-01 | 0.27  | 1.71E-01 |
| <b>RPL7P24</b>       | -0.33 | 8.51E-02 | -0.27 | 1.71E-01 |
| <b>STX6</b>          | 0.35  | 7.17E-02 | 0.27  | 1.71E-01 |
| <b>ZFAND6</b>        | 0.07  | 7.19E-01 | 0.27  | 1.71E-01 |
| <b>C1orf105</b>      | 0.24  | 2.11E-01 | -0.27 | 1.71E-01 |
| <b>EIF2S2P5</b>      | -0.10 | 6.08E-01 | -0.27 | 1.71E-01 |
| <b>FNDC1</b>         | -0.21 | 2.75E-01 | -0.27 | 1.71E-01 |
| <b>G12734</b>        | 0.16  | 4.02E-01 | -0.27 | 1.71E-01 |
| <b>G2589</b>         | 0.03  | 8.90E-01 | -0.27 | 1.71E-01 |
| <b>GHc-362H12.3</b>  | -0.02 | 9.17E-01 | -0.27 | 1.71E-01 |
| <b>GIMAP7</b>        | -0.16 | 4.07E-01 | 0.27  | 1.71E-01 |
| <b>KB-1958F4.2</b>   | 0.05  | 7.97E-01 | -0.27 | 1.71E-01 |
| <b>10-Mar</b>        | -0.35 | 6.57E-02 | 0.27  | 1.71E-01 |
| <b>MIR5692A2</b>     | 0.07  | 7.27E-01 | -0.27 | 1.71E-01 |
| <b>PAQR4</b>         | -0.21 | 2.88E-01 | 0.27  | 1.71E-01 |
| <b>PKDREJ</b>        | -0.09 | 6.54E-01 | -0.27 | 1.71E-01 |
| <b>PMFBP1</b>        | 0.15  | 4.53E-01 | -0.27 | 1.71E-01 |
| <b>PNPO</b>          | 0.31  | 1.07E-01 | 0.27  | 1.71E-01 |
| <b>RP11-391H12.8</b> | 0.02  | 9.06E-01 | -0.27 | 1.71E-01 |
| <b>SIK2</b>          | -0.48 | 9.84E-03 | -0.27 | 1.71E-01 |
| <b>ZBED5-AS1</b>     | -0.02 | 9.12E-01 | 0.27  | 1.71E-01 |
| <b>AC008752.3</b>    | 0.04  | 8.53E-01 | -0.27 | 1.72E-01 |
| <b>ARHGAP25</b>      | 0.19  | 3.39E-01 | 0.27  | 1.72E-01 |
| <b>B4GALT6</b>       | 0.09  | 6.67E-01 | -0.27 | 1.72E-01 |
| <b>CTD-2363C16.2</b> | -0.35 | 7.10E-02 | 0.27  | 1.72E-01 |
| <b>CTD-2368P22.1</b> | -0.17 | 3.80E-01 | -0.27 | 1.72E-01 |
| <b>G34374</b>        | 0.05  | 8.10E-01 | 0.27  | 1.72E-01 |
| <b>G7721</b>         | -0.06 | 7.79E-01 | -0.27 | 1.72E-01 |
| <b>IPO5P1</b>        | 0.12  | 5.50E-01 | -0.27 | 1.72E-01 |
| <b>LACTB2-AS1</b>    | 0.04  | 8.37E-01 | -0.27 | 1.72E-01 |
| <b>MIR3929</b>       | 0.45  | 1.53E-02 | -0.27 | 1.72E-01 |
| <b>NATD1</b>         | -0.13 | 5.13E-01 | 0.27  | 1.72E-01 |
| <b>RP11-252C24.2</b> | 0.03  | 8.64E-01 | -0.27 | 1.72E-01 |
| <b>RP11-329J18.5</b> | -0.13 | 5.14E-01 | -0.27 | 1.72E-01 |
| <b>TRAV14DV4</b>     | -0.12 | 5.54E-01 | 0.27  | 1.72E-01 |
| <b>ZNF850</b>        | -0.20 | 3.00E-01 | -0.27 | 1.72E-01 |
| <b>AKR7L</b>         | -0.14 | 4.63E-01 | -0.27 | 1.72E-01 |
| <b>BMP6</b>          | 0.02  | 9.06E-01 | 0.27  | 1.72E-01 |
| <b>C1orf68</b>       | 0.05  | 7.91E-01 | 0.27  | 1.72E-01 |
| <b>C7orf60</b>       | 0.07  | 7.39E-01 | 0.27  | 1.72E-01 |
| <b>CAMK2G</b>        | 0.16  | 4.04E-01 | 0.27  | 1.72E-01 |
| <b>CTD-3224K15.2</b> | 0.02  | 9.01E-01 | -0.27 | 1.72E-01 |
| <b>DUS1L</b>         | 0.15  | 4.33E-01 | 0.27  | 1.72E-01 |
| <b>G15375</b>        | -0.03 | 8.74E-01 | -0.27 | 1.72E-01 |
| <b>G23907</b>        | -0.06 | 7.71E-01 | -0.27 | 1.72E-01 |

|               |       |          |       |          |
|---------------|-------|----------|-------|----------|
| HOXA7         | 0.28  | 1.51E-01 | 0.27  | 1.72E-01 |
| IMMP2L        | -0.38 | 4.73E-02 | -0.27 | 1.72E-01 |
| ITGA9         | -0.30 | 1.15E-01 | -0.27 | 1.72E-01 |
| MAGEE1        | -0.07 | 7.09E-01 | -0.27 | 1.72E-01 |
| PGRMC1        | 0.00  | 9.89E-01 | -0.27 | 1.72E-01 |
| PLPP5         | 0.19  | 3.36E-01 | -0.27 | 1.72E-01 |
| PRPSAP1       | 0.03  | 8.88E-01 | 0.27  | 1.72E-01 |
| RAB11FIP5     | 0.12  | 5.52E-01 | 0.27  | 1.72E-01 |
| RNASEH2CP1    | 0.26  | 1.85E-01 | 0.27  | 1.72E-01 |
| RP13-228J13.5 | 0.06  | 7.60E-01 | -0.27 | 1.72E-01 |
| RP5-1159O4.1  | -0.12 | 5.59E-01 | -0.27 | 1.72E-01 |
| SEMA3F-AS1    | -0.23 | 2.36E-01 | -0.27 | 1.72E-01 |
| TIMM9P1       | 0.02  | 9.02E-01 | -0.27 | 1.72E-01 |
| YY1AP1        | 0.29  | 1.38E-01 | 0.27  | 1.72E-01 |
| ZNF510        | -0.09 | 6.64E-01 | -0.27 | 1.72E-01 |
| AC009245.3    | -0.24 | 2.14E-01 | 0.27  | 1.73E-01 |
| CYCSP4        | 0.13  | 5.15E-01 | -0.27 | 1.73E-01 |
| FXVD6         | -0.16 | 4.06E-01 | -0.27 | 1.73E-01 |
| MCM8          | -0.08 | 6.69E-01 | -0.27 | 1.73E-01 |
| NLRP3P        | 0.07  | 7.11E-01 | -0.27 | 1.73E-01 |
| PABPC4L       | -0.05 | 8.19E-01 | 0.27  | 1.73E-01 |
| PTPRQ         | -0.02 | 9.36E-01 | -0.27 | 1.73E-01 |
| RN7SL707P     | -0.01 | 9.55E-01 | 0.27  | 1.73E-01 |
| RNF20         | 0.06  | 7.79E-01 | 0.27  | 1.73E-01 |
| RP11-603J24.7 | -0.27 | 1.67E-01 | 0.27  | 1.73E-01 |
| SNORA34       | 0.12  | 5.50E-01 | 0.27  | 1.73E-01 |
| TNFSF13       | -0.10 | 6.21E-01 | 0.27  | 1.73E-01 |
| TNRC18        | 0.09  | 6.35E-01 | 0.27  | 1.73E-01 |
| TOLLIP        | 0.29  | 1.37E-01 | 0.27  | 1.73E-01 |
| TSSK3         | 0.07  | 7.18E-01 | -0.27 | 1.73E-01 |
| AC013410.2    | 0.20  | 3.05E-01 | -0.27 | 1.73E-01 |
| COMTD1        | 0.20  | 3.06E-01 | 0.27  | 1.73E-01 |
| CYP2T1P       | -0.21 | 2.73E-01 | 0.27  | 1.73E-01 |
| LINC00637     | -0.22 | 2.56E-01 | -0.27 | 1.73E-01 |
| LRRC37A6P     | 0.01  | 9.46E-01 | -0.27 | 1.73E-01 |
| LRRC4C        | -0.33 | 9.12E-02 | -0.27 | 1.73E-01 |
| OBP2A         | -0.06 | 7.75E-01 | -0.27 | 1.73E-01 |
| RNU6-142P     | -0.03 | 8.86E-01 | -0.27 | 1.73E-01 |
| RNU6-645P     | -0.01 | 9.47E-01 | 0.27  | 1.73E-01 |
| RP11-252C24.3 | -0.30 | 1.25E-01 | -0.27 | 1.73E-01 |
| RP11-271C24.2 | 0.12  | 5.41E-01 | -0.27 | 1.73E-01 |
| RP11-300D11.3 | 0.03  | 8.64E-01 | -0.27 | 1.73E-01 |
| RP11-41O4.1   | -0.08 | 6.69E-01 | -0.27 | 1.73E-01 |
| RP11-584P21.2 | 0.01  | 9.76E-01 | -0.27 | 1.73E-01 |
| RP3-340B19.3  | 0.15  | 4.52E-01 | 0.27  | 1.73E-01 |
| RPS6P8        | 0.12  | 5.29E-01 | 0.27  | 1.73E-01 |
| SCNN1D        | 0.31  | 1.08E-01 | 0.27  | 1.73E-01 |

|                |       |          |       |          |
|----------------|-------|----------|-------|----------|
| TGIF1          | 0.28  | 1.46E-01 | 0.27  | 1.73E-01 |
| TRHDE-AS1      | -0.19 | 3.22E-01 | -0.27 | 1.73E-01 |
| AC011648.1     | 0.15  | 4.55E-01 | 0.27  | 1.74E-01 |
| ALG12          | -0.26 | 1.85E-01 | 0.27  | 1.74E-01 |
| B3GALT2        | -0.10 | 6.31E-01 | -0.27 | 1.74E-01 |
| KCTD2          | -0.01 | 9.49E-01 | 0.27  | 1.74E-01 |
| KDM4A-AS1      | 0.07  | 7.30E-01 | -0.27 | 1.74E-01 |
| LOXHD1         | 0.25  | 1.94E-01 | 0.27  | 1.74E-01 |
| RANP8          | 0.20  | 2.97E-01 | -0.27 | 1.74E-01 |
| RP11-140I16.3  | -0.03 | 8.65E-01 | -0.27 | 1.74E-01 |
| RP11-141M3.6   | 0.09  | 6.66E-01 | -0.27 | 1.74E-01 |
| RP11-667K14.14 | 0.21  | 2.91E-01 | -0.27 | 1.74E-01 |
| SP100          | 0.18  | 3.54E-01 | 0.27  | 1.74E-01 |
| TWF2           | 0.20  | 3.15E-01 | 0.27  | 1.74E-01 |
| ZNF101P2       | -0.16 | 4.18E-01 | -0.27 | 1.74E-01 |
| ACAA2          | 0.13  | 5.01E-01 | -0.27 | 1.74E-01 |
| CNFN           | 0.29  | 1.38E-01 | 0.27  | 1.74E-01 |
| HAVCR2         | 0.32  | 9.90E-02 | 0.27  | 1.74E-01 |
| MIR3677        | 0.03  | 8.80E-01 | -0.27 | 1.74E-01 |
| NACA3P         | 0.06  | 7.68E-01 | 0.27  | 1.74E-01 |
| OCA2           | -0.24 | 2.27E-01 | -0.27 | 1.74E-01 |
| RFESD          | 0.33  | 8.70E-02 | -0.27 | 1.74E-01 |
| RP1-159A19.4   | 0.06  | 7.78E-01 | -0.27 | 1.74E-01 |
| RP11-248J23.6  | -0.26 | 1.81E-01 | -0.27 | 1.74E-01 |
| RP11-259F16.3  | -0.11 | 5.73E-01 | 0.27  | 1.74E-01 |
| RP11-571M6.18  | 0.02  | 9.22E-01 | -0.27 | 1.74E-01 |
| RP11-5017.1    | 0.23  | 2.47E-01 | 0.27  | 1.74E-01 |
| SCNN1A         | 0.08  | 6.75E-01 | 0.27  | 1.74E-01 |
| SFRP1          | 0.18  | 3.49E-01 | 0.27  | 1.74E-01 |
| AC142528.1     | -0.14 | 4.66E-01 | 0.27  | 1.75E-01 |
| CASK-AS1       | 0.09  | 6.53E-01 | -0.27 | 1.75E-01 |
| CTB-96E2.10    | -0.20 | 3.05E-01 | 0.27  | 1.75E-01 |
| DENND2A        | -0.03 | 8.70E-01 | -0.27 | 1.75E-01 |
| FOPNL          | 0.11  | 5.75E-01 | -0.27 | 1.75E-01 |
| LYSMD4         | 0.17  | 3.98E-01 | 0.27  | 1.75E-01 |
| MOGAT2         | -0.05 | 8.05E-01 | -0.27 | 1.75E-01 |
| NETO2          | 0.12  | 5.31E-01 | 0.27  | 1.75E-01 |
| NXT2           | -0.04 | 8.37E-01 | -0.27 | 1.75E-01 |
| PCED1B         | 0.04  | 8.42E-01 | 0.27  | 1.75E-01 |
| PLAGL1         | -0.46 | 1.40E-02 | -0.27 | 1.75E-01 |
| RBPMS2         | -0.24 | 2.22E-01 | 0.27  | 1.75E-01 |
| RNF182         | -0.25 | 2.05E-01 | -0.27 | 1.75E-01 |
| RP11-385G16.1  | 0.26  | 1.84E-01 | -0.27 | 1.75E-01 |
| RP11-439A17.10 | -0.06 | 7.79E-01 | -0.27 | 1.75E-01 |
| TMEM200C       | -0.22 | 2.50E-01 | -0.27 | 1.75E-01 |
| AC004449.6     | -0.19 | 3.26E-01 | -0.27 | 1.75E-01 |
| AGBL2          | 0.00  | 9.82E-01 | 0.27  | 1.75E-01 |

|               |       |          |       |          |
|---------------|-------|----------|-------|----------|
| CPSF1P1       | -0.01 | 9.70E-01 | -0.27 | 1.75E-01 |
| CYYR1-AS1     | 0.10  | 6.10E-01 | 0.27  | 1.75E-01 |
| DNAJA4        | -0.39 | 4.26E-02 | -0.27 | 1.75E-01 |
| EHMT2         | 0.05  | 7.88E-01 | 0.27  | 1.75E-01 |
| IFNA20P       | 0.29  | 1.36E-01 | -0.27 | 1.75E-01 |
| MSX2          | 0.16  | 4.23E-01 | 0.27  | 1.75E-01 |
| MYO5C         | -0.31 | 1.09E-01 | -0.27 | 1.75E-01 |
| RBPMS-AS1     | 0.18  | 3.49E-01 | 0.27  | 1.75E-01 |
| RP11-158I9.5  | -0.01 | 9.74E-01 | -0.27 | 1.75E-01 |
| RP11-260E18.1 | -0.13 | 5.13E-01 | -0.27 | 1.75E-01 |
| RP11-44F21.2  | -0.11 | 5.88E-01 | -0.27 | 1.75E-01 |
| RP11-680H20.1 | 0.20  | 3.16E-01 | 0.27  | 1.75E-01 |
| RP11-71L14.3  | 0.30  | 1.15E-01 | 0.27  | 1.75E-01 |
| RP11-723O4.9  | 0.06  | 7.76E-01 | -0.27 | 1.75E-01 |
| RP13-753N3.1  | -0.03 | 8.90E-01 | 0.27  | 1.75E-01 |
| RPL37AP1      | -0.31 | 1.12E-01 | -0.27 | 1.75E-01 |
| SLC38A11      | 0.00  | 9.82E-01 | 0.27  | 1.75E-01 |
| SMIM14        | 0.17  | 3.93E-01 | 0.27  | 1.75E-01 |
| TRAV3         | 0.15  | 4.51E-01 | 0.27  | 1.75E-01 |
| CH17-262A2.1  | 0.13  | 5.04E-01 | -0.27 | 1.76E-01 |
| GLI3          | -0.20 | 3.13E-01 | 0.27  | 1.76E-01 |
| GRIA1         | 0.15  | 4.57E-01 | -0.27 | 1.76E-01 |
| INO80         | 0.11  | 5.66E-01 | -0.27 | 1.76E-01 |
| PPP4R1-AS1    | 0.12  | 5.54E-01 | 0.27  | 1.76E-01 |
| RP11-123O10.1 | 0.34  | 7.84E-02 | -0.27 | 1.76E-01 |
| SNORA14B      | 0.00  | 9.89E-01 | 0.27  | 1.76E-01 |
| SNORD74       | -0.22 | 2.51E-01 | -0.27 | 1.76E-01 |
| SYT7          | 0.34  | 8.02E-02 | -0.27 | 1.76E-01 |
| UEVLD         | 0.34  | 7.84E-02 | 0.27  | 1.76E-01 |
| AC011363.1    | -0.04 | 8.26E-01 | -0.27 | 1.76E-01 |
| ARL13B        | 0.10  | 6.22E-01 | -0.27 | 1.76E-01 |
| ASCC1         | 0.39  | 4.21E-02 | 0.27  | 1.76E-01 |
| C9orf3        | -0.08 | 6.89E-01 | 0.27  | 1.76E-01 |
| DOK7          | 0.08  | 6.87E-01 | -0.27 | 1.76E-01 |
| FBP1          | 0.05  | 8.12E-01 | -0.27 | 1.76E-01 |
| FCGBP         | 0.08  | 6.72E-01 | -0.27 | 1.76E-01 |
| HACD2         | -0.05 | 8.01E-01 | -0.27 | 1.76E-01 |
| KCNJ12        | 0.20  | 3.09E-01 | 0.27  | 1.76E-01 |
| MIR5094       | 0.19  | 3.41E-01 | -0.27 | 1.76E-01 |
| OPA1          | 0.16  | 4.09E-01 | -0.27 | 1.76E-01 |
| RP11-314N13.9 | 0.03  | 8.78E-01 | 0.27  | 1.76E-01 |
| RP11-563E2.2  | -0.04 | 8.35E-01 | -0.27 | 1.76E-01 |
| RPL7AP26      | -0.19 | 3.41E-01 | -0.27 | 1.76E-01 |
| SYT5          | 0.02  | 9.05E-01 | 0.27  | 1.76E-01 |
| TMC3          | 0.06  | 7.54E-01 | 0.27  | 1.76E-01 |
| AGO3          | -0.06 | 7.46E-01 | -0.27 | 1.77E-01 |
| CTC-499B15.7  | -0.24 | 2.19E-01 | -0.27 | 1.77E-01 |

|               |       |          |       |          |
|---------------|-------|----------|-------|----------|
| RP11-379F4.9  | -0.07 | 7.24E-01 | -0.27 | 1.77E-01 |
| RP11-45L9.1   | -0.22 | 2.63E-01 | -0.27 | 1.77E-01 |
| CTC-297N7.10  | -0.47 | 1.09E-02 | 0.27  | 1.77E-01 |
| METAP1        | 0.36  | 6.15E-02 | 0.27  | 1.77E-01 |
| RP11-308D16.1 | -0.14 | 4.66E-01 | 0.27  | 1.77E-01 |
| RP11-336A10.5 | -0.05 | 7.96E-01 | 0.27  | 1.77E-01 |
| RP11-449D8.1  | 0.17  | 3.97E-01 | 0.27  | 1.77E-01 |
| RP11-502I4.3  | -0.23 | 2.48E-01 | 0.27  | 1.77E-01 |
| TXLNGY        | 0.21  | 2.87E-01 | 0.27  | 1.77E-01 |
| ZNF213        | 0.20  | 3.06E-01 | 0.27  | 1.77E-01 |
| CLCA2         | 0.28  | 1.55E-01 | 0.27  | 1.77E-01 |
| KLHL29        | -0.31 | 1.11E-01 | -0.27 | 1.77E-01 |
| LCE3D         | 0.21  | 2.90E-01 | 0.27  | 1.77E-01 |
| LRCH2         | 0.02  | 9.06E-01 | 0.27  | 1.77E-01 |
| LTN1          | -0.03 | 8.86E-01 | -0.27 | 1.77E-01 |
| MLXIP         | 0.06  | 7.73E-01 | -0.27 | 1.77E-01 |
| MTND1P9       | 0.06  | 7.63E-01 | -0.27 | 1.77E-01 |
| PTMAP2        | -0.01 | 9.64E-01 | -0.27 | 1.77E-01 |
| RNF121        | 0.47  | 1.08E-02 | 0.27  | 1.77E-01 |
| RPL23AP30     | 0.07  | 7.25E-01 | 0.27  | 1.77E-01 |
| RPP25         | -0.09 | 6.54E-01 | -0.27 | 1.77E-01 |
| RSL24D1       | 0.03  | 8.70E-01 | -0.27 | 1.77E-01 |
| SERTAD1       | 0.42  | 2.56E-02 | 0.27  | 1.77E-01 |
| SOCS5P4       | 0.07  | 7.41E-01 | -0.27 | 1.77E-01 |
| TMC1          | 0.16  | 4.17E-01 | 0.27  | 1.77E-01 |
| XLOC_008277   | 0.39  | 4.21E-02 | 0.27  | 1.77E-01 |
| XLOC_011382   | -0.09 | 6.61E-01 | -0.27 | 1.77E-01 |
| AC004967.7    | -0.05 | 7.88E-01 | -0.27 | 1.78E-01 |
| AC005785.2    | -0.14 | 4.74E-01 | -0.27 | 1.78E-01 |
| AHNAK2        | -0.41 | 3.03E-02 | -0.27 | 1.78E-01 |
| DNAL4         | -0.08 | 6.73E-01 | 0.27  | 1.78E-01 |
| G31549        | -0.20 | 3.16E-01 | -0.27 | 1.78E-01 |
| GCNT4         | 0.29  | 1.40E-01 | 0.27  | 1.78E-01 |
| IDO2          | 0.02  | 9.25E-01 | -0.27 | 1.78E-01 |
| RAB40A        | -0.19 | 3.34E-01 | -0.27 | 1.78E-01 |
| RP11-466A19.7 | -0.02 | 9.06E-01 | -0.27 | 1.78E-01 |
| RPS3AP32      | -0.07 | 7.40E-01 | -0.27 | 1.78E-01 |
| SCG3          | 0.15  | 4.39E-01 | -0.27 | 1.78E-01 |
| TAS2R62P      | -0.24 | 2.11E-01 | 0.27  | 1.78E-01 |
| TLK2          | 0.15  | 4.48E-01 | 0.27  | 1.78E-01 |
| ZNF285B       | -0.24 | 2.27E-01 | -0.27 | 1.78E-01 |
| B3GALT1       | -0.58 | 1.21E-03 | -0.27 | 1.78E-01 |
| BRD3          | -0.20 | 3.02E-01 | -0.27 | 1.78E-01 |
| BRF2          | 0.13  | 4.95E-01 | 0.27  | 1.78E-01 |
| GFI1          | 0.18  | 3.60E-01 | -0.27 | 1.78E-01 |
| MT1A          | -0.29 | 1.34E-01 | -0.27 | 1.78E-01 |
| NYAP2         | -0.04 | 8.26E-01 | 0.27  | 1.78E-01 |



|               |       |          |       |          |
|---------------|-------|----------|-------|----------|
| OTOF          | -0.26 | 1.78E-01 | -0.27 | 1.78E-01 |
| PDZRN3-AS1    | -0.05 | 7.87E-01 | -0.27 | 1.78E-01 |
| PPP1R12B      | 0.06  | 7.54E-01 | 0.27  | 1.78E-01 |
| RABGGTA       | 0.38  | 4.49E-02 | 0.27  | 1.78E-01 |
| RPS5P3        | -0.32 | 9.93E-02 | -0.27 | 1.78E-01 |
| SLC39A2       | 0.29  | 1.37E-01 | 0.27  | 1.78E-01 |
| TAOK1         | 0.33  | 8.98E-02 | 0.27  | 1.78E-01 |
| TCEA2         | 0.02  | 9.35E-01 | 0.27  | 1.78E-01 |
| UBE2QL1       | 0.27  | 1.64E-01 | 0.27  | 1.78E-01 |
| XLOC_012351   | 0.00  | 9.99E-01 | -0.27 | 1.78E-01 |
| YAF2          | 0.07  | 7.07E-01 | -0.27 | 1.78E-01 |
| AC009009.1    | 0.09  | 6.67E-01 | -0.27 | 1.79E-01 |
| AC016745.3    | -0.37 | 4.96E-02 | -0.27 | 1.79E-01 |
| AL138706.1    | 0.07  | 7.23E-01 | -0.27 | 1.79E-01 |
| CIDEC         | 0.08  | 6.75E-01 | -0.27 | 1.79E-01 |
| CNOT10-AS1    | -0.17 | 3.74E-01 | -0.27 | 1.79E-01 |
| CTD-2547L24.4 | 0.34  | 7.79E-02 | 0.27  | 1.79E-01 |
| KIAA1644      | -0.10 | 6.23E-01 | 0.27  | 1.79E-01 |
| LLNLR-307A6.1 | -0.53 | 3.70E-03 | 0.27  | 1.79E-01 |
| MIR4762       | -0.03 | 8.95E-01 | -0.27 | 1.79E-01 |
| MLLT1         | 0.39  | 4.15E-02 | 0.27  | 1.79E-01 |
| PCLO          | -0.10 | 6.14E-01 | -0.27 | 1.79E-01 |
| PCSK2         | -0.22 | 2.63E-01 | -0.27 | 1.79E-01 |
| PMM1          | -0.22 | 2.63E-01 | 0.27  | 1.79E-01 |
| RP1-99E18.2   | -0.31 | 1.10E-01 | -0.27 | 1.79E-01 |
| RP11-334C17.3 | 0.12  | 5.39E-01 | 0.27  | 1.79E-01 |
| TRIOBP        | 0.36  | 5.86E-02 | 0.27  | 1.79E-01 |
| ZFP36         | 0.21  | 2.95E-01 | 0.27  | 1.79E-01 |
| HCG23         | 0.19  | 3.24E-01 | 0.27  | 1.79E-01 |
| HCLS1         | 0.13  | 5.23E-01 | 0.27  | 1.79E-01 |
| HNRNPA1P1     | 0.03  | 8.82E-01 | -0.27 | 1.79E-01 |
| KL            | 0.32  | 9.65E-02 | 0.27  | 1.79E-01 |
| LMF1          | 0.21  | 2.87E-01 | 0.27  | 1.79E-01 |
| PART1         | 0.20  | 3.16E-01 | 0.27  | 1.79E-01 |
| PPWD1         | -0.08 | 6.74E-01 | -0.27 | 1.79E-01 |
| RAI1-AS1      | -0.25 | 2.05E-01 | -0.27 | 1.79E-01 |
| RP11-689E3.2  | -0.21 | 2.76E-01 | -0.27 | 1.79E-01 |
| RP11-706C16.7 | 0.03  | 8.67E-01 | 0.27  | 1.79E-01 |
| RP11-806O11.1 | -0.10 | 6.18E-01 | -0.27 | 1.79E-01 |
| RPSAP21       | -0.06 | 7.72E-01 | -0.27 | 1.79E-01 |
| C15orf62      | 0.33  | 8.24E-02 | 0.27  | 1.80E-01 |
| CTD-2132N18.2 | -0.19 | 3.24E-01 | 0.27  | 1.80E-01 |
| DCTN1-AS1     | 0.11  | 5.72E-01 | -0.27 | 1.80E-01 |
| FKBP1A        | 0.35  | 6.39E-02 | 0.27  | 1.80E-01 |
| FLYWCH2       | 0.03  | 8.77E-01 | 0.27  | 1.80E-01 |
| KB-1732A1.1   | 0.32  | 9.62E-02 | 0.27  | 1.80E-01 |
| MAPK9         | 0.21  | 2.76E-01 | 0.27  | 1.80E-01 |

|                |       |          |       |          |
|----------------|-------|----------|-------|----------|
| MIR566         | -0.01 | 9.69E-01 | -0.27 | 1.80E-01 |
| NADK2          | 0.31  | 1.12E-01 | -0.27 | 1.80E-01 |
| RP11-250B2.6   | -0.07 | 7.29E-01 | -0.27 | 1.80E-01 |
| RPL21P3        | -0.26 | 1.78E-01 | -0.27 | 1.80E-01 |
| WRAP73         | 0.08  | 6.70E-01 | 0.27  | 1.80E-01 |
| XLOC_005778    | 0.20  | 2.97E-01 | -0.27 | 1.80E-01 |
| APOBEC3F       | 0.21  | 2.88E-01 | 0.27  | 1.80E-01 |
| GALNTL6        | -0.38 | 4.56E-02 | -0.27 | 1.80E-01 |
| ITPK1          | 0.16  | 4.29E-01 | 0.27  | 1.80E-01 |
| MORF4L2-AS1    | 0.02  | 9.12E-01 | -0.27 | 1.80E-01 |
| MTND4P20       | -0.20 | 3.15E-01 | -0.27 | 1.80E-01 |
| MTND5P28       | 0.06  | 7.53E-01 | 0.27  | 1.80E-01 |
| OLMALINC       | -0.17 | 3.89E-01 | 0.27  | 1.80E-01 |
| OVOS2          | -0.02 | 9.34E-01 | -0.27 | 1.80E-01 |
| PPP1R26P1      | 0.07  | 7.20E-01 | -0.27 | 1.80E-01 |
| RBM25          | -0.06 | 7.59E-01 | -0.27 | 1.80E-01 |
| RNU6-177P      | -0.01 | 9.59E-01 | -0.27 | 1.80E-01 |
| RP11-1152H14.1 | -0.20 | 3.02E-01 | -0.27 | 1.80E-01 |
| RP11-539L10.5  | 0.11  | 5.61E-01 | 0.27  | 1.80E-01 |
| U7             | -0.07 | 7.13E-01 | 0.27  | 1.80E-01 |
| AC003973.3     | -0.16 | 4.04E-01 | -0.27 | 1.81E-01 |
| CLCN3          | 0.27  | 1.72E-01 | 0.27  | 1.81E-01 |
| DOCK4-AS1      | -0.34 | 7.69E-02 | -0.27 | 1.81E-01 |
| G5142          | -0.05 | 7.84E-01 | -0.27 | 1.81E-01 |
| GLS2           | 0.01  | 9.47E-01 | -0.27 | 1.81E-01 |
| KANSL2         | -0.04 | 8.24E-01 | -0.27 | 1.81E-01 |
| MIR33B         | 0.26  | 1.76E-01 | 0.27  | 1.81E-01 |
| MPP3           | -0.32 | 9.24E-02 | -0.27 | 1.81E-01 |
| RN7SKP74       | -0.34 | 8.05E-02 | -0.27 | 1.81E-01 |
| RNU6-196P      | 0.31  | 1.13E-01 | -0.27 | 1.81E-01 |
| RNU7-169P      | 0.00  | 9.80E-01 | -0.27 | 1.81E-01 |
| RP4-781K5.6    | -0.12 | 5.44E-01 | -0.27 | 1.81E-01 |
| AC004988.1     | -0.27 | 1.67E-01 | -0.27 | 1.81E-01 |
| ATXN7          | -0.10 | 5.96E-01 | -0.27 | 1.81E-01 |
| G40462         | 0.33  | 8.64E-02 | 0.27  | 1.81E-01 |
| GLIS3          | -0.35 | 6.59E-02 | 0.27  | 1.81E-01 |
| GPR84          | 0.52  | 4.18E-03 | -0.27 | 1.81E-01 |
| IGSF6          | 0.10  | 6.26E-01 | 0.27  | 1.81E-01 |
| PSD2           | 0.03  | 8.77E-01 | -0.27 | 1.81E-01 |
| RP11-220D10.1  | 0.14  | 4.64E-01 | 0.27  | 1.81E-01 |
| RP11-301O19.1  | 0.32  | 9.87E-02 | 0.27  | 1.81E-01 |
| RP11-574F21.2  | 0.05  | 7.95E-01 | -0.27 | 1.81E-01 |
| RP11-63L7.5    | -0.20 | 3.07E-01 | 0.27  | 1.81E-01 |
| RUFY2          | 0.01  | 9.63E-01 | -0.27 | 1.81E-01 |
| SH2D7          | 0.08  | 6.87E-01 | 0.27  | 1.81E-01 |
| SNX20          | 0.34  | 7.79E-02 | 0.27  | 1.81E-01 |
| STIL           | 0.01  | 9.45E-01 | 0.27  | 1.81E-01 |

|               |       |          |       |          |
|---------------|-------|----------|-------|----------|
| TCERG1L       | 0.17  | 3.97E-01 | -0.27 | 1.81E-01 |
| WHSC1L1       | -0.24 | 2.15E-01 | -0.27 | 1.81E-01 |
| YBX1P7        | -0.15 | 4.50E-01 | 0.27  | 1.81E-01 |
| ZNF550        | 0.02  | 9.10E-01 | -0.27 | 1.81E-01 |
| EDA2R         | -0.10 | 5.97E-01 | 0.26  | 1.82E-01 |
| IL10RA        | 0.25  | 1.97E-01 | 0.26  | 1.82E-01 |
| OR2G6         | 0.00  | 9.93E-01 | -0.26 | 1.82E-01 |
| PNKP          | 0.01  | 9.44E-01 | 0.26  | 1.82E-01 |
| RNA5SP290     | 0.15  | 4.33E-01 | -0.26 | 1.82E-01 |
| RP11-277P12.9 | 0.29  | 1.29E-01 | 0.26  | 1.82E-01 |
| SIT1          | 0.29  | 1.36E-01 | 0.26  | 1.82E-01 |
| SLC5A5        | 0.01  | 9.76E-01 | 0.26  | 1.82E-01 |
| TMEM17        | 0.40  | 3.52E-02 | 0.26  | 1.82E-01 |
| WDR37         | 0.25  | 2.06E-01 | 0.26  | 1.82E-01 |
| AC006460.2    | -0.38 | 4.39E-02 | -0.26 | 1.82E-01 |
| BTBD18        | -0.24 | 2.21E-01 | -0.26 | 1.82E-01 |
| C10orf95      | 0.27  | 1.60E-01 | -0.26 | 1.82E-01 |
| CTD-2218G20.1 | 0.19  | 3.44E-01 | -0.26 | 1.82E-01 |
| CTD-2639E6.4  | -0.13 | 5.07E-01 | 0.26  | 1.82E-01 |
| CTGF          | -0.09 | 6.58E-01 | -0.26 | 1.82E-01 |
| ETFB          | 0.42  | 2.50E-02 | 0.26  | 1.82E-01 |
| KLB           | 0.20  | 3.00E-01 | -0.26 | 1.82E-01 |
| LRRIQ3        | -0.01 | 9.76E-01 | 0.26  | 1.82E-01 |
| RP11-434D12.1 | -0.02 | 9.10E-01 | -0.26 | 1.82E-01 |
| RP11-517P14.2 | -0.19 | 3.28E-01 | 0.26  | 1.82E-01 |
| RP11-554D14.8 | 0.11  | 5.91E-01 | -0.26 | 1.82E-01 |
| RP11-678G14.2 | -0.02 | 9.27E-01 | -0.26 | 1.82E-01 |
| RP11-687M24.7 | 0.03  | 8.99E-01 | -0.26 | 1.82E-01 |
| RP3-425P12.4  | -0.36 | 5.84E-02 | -0.26 | 1.82E-01 |
| TSPAN10       | 0.02  | 9.29E-01 | 0.26  | 1.82E-01 |
| VLDLR         | 0.23  | 2.36E-01 | 0.26  | 1.82E-01 |
| XLOC_008224   | 0.32  | 9.39E-02 | 0.26  | 1.82E-01 |
| CACNB3        | 0.20  | 3.17E-01 | 0.26  | 1.83E-01 |
| CTD-2540B15.9 | 0.09  | 6.37E-01 | 0.26  | 1.83E-01 |
| DOK2          | 0.37  | 5.48E-02 | 0.26  | 1.83E-01 |
| KDM5D         | 0.32  | 9.42E-02 | 0.26  | 1.83E-01 |
| PHF11         | 0.01  | 9.74E-01 | 0.26  | 1.83E-01 |
| RELA          | 0.30  | 1.19E-01 | 0.26  | 1.83E-01 |
| RN7SL4P       | 0.08  | 7.01E-01 | 0.26  | 1.83E-01 |
| RNU6-1334P    | 0.23  | 2.43E-01 | 0.26  | 1.83E-01 |
| VMP1          | 0.10  | 6.19E-01 | 0.26  | 1.83E-01 |
| AL138751.1    | -0.10 | 6.07E-01 | -0.26 | 1.83E-01 |
| DIAPH2-AS1    | -0.13 | 4.94E-01 | -0.26 | 1.83E-01 |
| FAM133B       | 0.02  | 9.34E-01 | -0.26 | 1.83E-01 |
| ITM2A         | -0.07 | 7.41E-01 | -0.26 | 1.83E-01 |
| RP11-365H22.2 | 0.29  | 1.33E-01 | -0.26 | 1.83E-01 |
| RP11-511H23.2 | -0.01 | 9.79E-01 | -0.26 | 1.83E-01 |

|                      |       |          |       |          |
|----------------------|-------|----------|-------|----------|
| <b>RP11-815J21.3</b> | 0.43  | 2.36E-02 | -0.26 | 1.83E-01 |
| <b>SMCHD1</b>        | 0.06  | 7.48E-01 | -0.26 | 1.83E-01 |
| <b>UST</b>           | -0.14 | 4.68E-01 | -0.26 | 1.83E-01 |
| <b>ZNF195</b>        | 0.30  | 1.24E-01 | -0.26 | 1.83E-01 |
| <b>ENO1-AS1</b>      | -0.15 | 4.54E-01 | 0.26  | 1.83E-01 |
| <b>GLDC</b>          | -0.22 | 2.53E-01 | -0.26 | 1.83E-01 |
| <b>MAGI1-IT1</b>     | 0.06  | 7.77E-01 | -0.26 | 1.83E-01 |
| <b>MAP10</b>         | 0.00  | 9.94E-01 | 0.26  | 1.83E-01 |
| <b>MAP4K4</b>        | 0.15  | 4.61E-01 | 0.26  | 1.83E-01 |
| <b>PGM5-AS1</b>      | 0.31  | 1.10E-01 | -0.26 | 1.83E-01 |
| <b>PRKAA1</b>        | 0.20  | 3.07E-01 | -0.26 | 1.83E-01 |
| <b>RP11-244G12.1</b> | 0.00  | 9.92E-01 | -0.26 | 1.83E-01 |
| <b>RP11-42I10.1</b>  | 0.37  | 5.23E-02 | 0.26  | 1.83E-01 |
| <b>RP11-57H14.2</b>  | -0.08 | 7.03E-01 | 0.26  | 1.83E-01 |
| <b>STAB1</b>         | 0.09  | 6.55E-01 | 0.26  | 1.83E-01 |
| <b>G32522</b>        | -0.03 | 8.91E-01 | -0.26 | 1.84E-01 |
| <b>MRPS31P4</b>      | -0.19 | 3.36E-01 | -0.26 | 1.84E-01 |
| <b>RP11-243M5.5</b>  | -0.22 | 2.64E-01 | -0.26 | 1.84E-01 |
| <b>RP11-439E19.9</b> | 0.18  | 3.68E-01 | -0.26 | 1.84E-01 |
| <b>RP11-544M22.3</b> | 0.19  | 3.36E-01 | -0.26 | 1.84E-01 |
| <b>THUMPD1</b>       | -0.08 | 6.87E-01 | -0.26 | 1.84E-01 |
| <b>TWIST1</b>        | -0.30 | 1.23E-01 | -0.26 | 1.84E-01 |
| <b>FTH1</b>          | 0.01  | 9.45E-01 | 0.26  | 1.84E-01 |
| <b>KLHL2</b>         | 0.26  | 1.78E-01 | 0.26  | 1.84E-01 |
| <b>OBFC1</b>         | 0.19  | 3.38E-01 | 0.26  | 1.84E-01 |
| <b>PRKD3</b>         | -0.29 | 1.40E-01 | 0.26  | 1.84E-01 |
| <b>PRR14</b>         | -0.19 | 3.34E-01 | 0.26  | 1.84E-01 |
| <b>SERPINA5</b>      | -0.15 | 4.39E-01 | 0.26  | 1.84E-01 |
| <b>SNHG20</b>        | 0.11  | 5.73E-01 | 0.26  | 1.84E-01 |
| <b>AC079776.1</b>    | -0.23 | 2.49E-01 | -0.26 | 1.85E-01 |
| <b>ARL1</b>          | 0.09  | 6.60E-01 | -0.26 | 1.85E-01 |
| <b>CACNA1C</b>       | -0.18 | 3.58E-01 | 0.26  | 1.85E-01 |
| <b>CD86</b>          | 0.11  | 5.70E-01 | 0.26  | 1.85E-01 |
| <b>CNPY4</b>         | -0.14 | 4.66E-01 | 0.26  | 1.85E-01 |
| <b>CTC-529I10.1</b>  | 0.14  | 4.89E-01 | -0.26 | 1.85E-01 |
| <b>CTD-2006H14.2</b> | -0.11 | 5.81E-01 | -0.26 | 1.85E-01 |
| <b>CUZD1</b>         | 0.10  | 6.26E-01 | -0.26 | 1.85E-01 |
| <b>F5</b>            | 0.02  | 9.13E-01 | 0.26  | 1.85E-01 |
| <b>FBXO40</b>        | 0.33  | 8.34E-02 | -0.26 | 1.85E-01 |
| <b>RNU1-122P</b>     | 0.09  | 6.33E-01 | 0.26  | 1.85E-01 |
| <b>RNU6-817P</b>     | -0.06 | 7.57E-01 | -0.26 | 1.85E-01 |
| <b>RP11-642A1.1</b>  | -0.11 | 5.67E-01 | -0.26 | 1.85E-01 |
| <b>RP11-787D11.1</b> | 0.29  | 1.35E-01 | -0.26 | 1.85E-01 |
| <b>RPL27P12</b>      | 0.03  | 8.85E-01 | -0.26 | 1.85E-01 |
| <b>SLC2A6</b>        | 0.24  | 2.23E-01 | 0.26  | 1.85E-01 |
| <b>SUMF2</b>         | 0.16  | 4.09E-01 | 0.26  | 1.85E-01 |
| <b>TEKT2</b>         | -0.04 | 8.24E-01 | -0.26 | 1.85E-01 |

|                      |       |          |       |          |
|----------------------|-------|----------|-------|----------|
| <b>TMEM206</b>       | 0.06  | 7.47E-01 | 0.26  | 1.85E-01 |
| <b>AC100830.5</b>    | 0.25  | 2.01E-01 | -0.26 | 1.85E-01 |
| <b>AP000525.9</b>    | -0.03 | 8.91E-01 | 0.26  | 1.85E-01 |
| <b>G33836</b>        | 0.06  | 7.78E-01 | -0.26 | 1.85E-01 |
| <b>GNAS-AS1</b>      | -0.23 | 2.44E-01 | -0.26 | 1.85E-01 |
| <b>GPRC5B</b>        | -0.17 | 3.90E-01 | 0.26  | 1.85E-01 |
| <b>RAB33B</b>        | 0.20  | 3.15E-01 | 0.26  | 1.85E-01 |
| <b>RNU6ATAC9P</b>    | 0.09  | 6.60E-01 | -0.26 | 1.85E-01 |
| <b>RP11-12L8.1</b>   | -0.06 | 7.75E-01 | -0.26 | 1.85E-01 |
| <b>RP11-351C21.2</b> | -0.33 | 8.34E-02 | -0.26 | 1.85E-01 |
| <b>RP11-58G13.1</b>  | -0.03 | 8.65E-01 | -0.26 | 1.85E-01 |
| <b>RTN4</b>          | -0.22 | 2.64E-01 | -0.26 | 1.85E-01 |
| <b>SMAP1</b>         | 0.27  | 1.59E-01 | 0.26  | 1.85E-01 |
| <b>TSC22D3</b>       | -0.13 | 5.04E-01 | -0.26 | 1.85E-01 |
| <b>AJUBA</b>         | 0.09  | 6.66E-01 | 0.26  | 1.86E-01 |
| <b>ANK2</b>          | -0.29 | 1.28E-01 | -0.26 | 1.86E-01 |
| <b>ARVCF</b>         | 0.05  | 7.87E-01 | -0.26 | 1.86E-01 |
| <b>DRG2</b>          | 0.29  | 1.37E-01 | 0.26  | 1.86E-01 |
| <b>FEZ1</b>          | -0.22 | 2.54E-01 | -0.26 | 1.86E-01 |
| <b>FKBP4P1</b>       | 0.14  | 4.62E-01 | -0.26 | 1.86E-01 |
| <b>G14802</b>        | -0.04 | 8.49E-01 | -0.26 | 1.86E-01 |
| <b>LINC00624</b>     | -0.25 | 2.06E-01 | -0.26 | 1.86E-01 |
| <b>LINC00936</b>     | -0.27 | 1.72E-01 | -0.26 | 1.86E-01 |
| <b>PIP5K1C</b>       | 0.08  | 6.69E-01 | 0.26  | 1.86E-01 |
| <b>PLA2G15</b>       | -0.22 | 2.68E-01 | 0.26  | 1.86E-01 |
| <b>RNU6-701P</b>     | -0.16 | 4.28E-01 | -0.26 | 1.86E-01 |
| <b>RP11-16N11.2</b>  | 0.15  | 4.54E-01 | -0.26 | 1.86E-01 |
| <b>RP11-497G19.7</b> | -0.23 | 2.47E-01 | 0.26  | 1.86E-01 |
| <b>RP11-584P21.4</b> | -0.21 | 2.85E-01 | -0.26 | 1.86E-01 |
| <b>RP11-944L7.4</b>  | 0.01  | 9.45E-01 | -0.26 | 1.86E-01 |
| <b>SERINC5</b>       | 0.31  | 1.13E-01 | 0.26  | 1.86E-01 |
| <b>SLC7A1</b>        | 0.29  | 1.30E-01 | 0.26  | 1.86E-01 |
| <b>SNORA80B</b>      | -0.09 | 6.53E-01 | 0.26  | 1.86E-01 |
| <b>TRIM62</b>        | 0.06  | 7.78E-01 | 0.26  | 1.86E-01 |
| <b>ZDHC8</b>         | 0.23  | 2.29E-01 | 0.26  | 1.86E-01 |
| <b>ZIM2</b>          | 0.23  | 2.44E-01 | -0.26 | 1.86E-01 |
| <b>ABCC1</b>         | 0.23  | 2.44E-01 | 0.26  | 1.86E-01 |
| <b>APAF1</b>         | 0.17  | 4.01E-01 | 0.26  | 1.86E-01 |
| <b>ATP8B1</b>        | 0.34  | 7.66E-02 | 0.26  | 1.86E-01 |
| <b>C3orf38</b>       | 0.12  | 5.43E-01 | -0.26 | 1.86E-01 |
| <b>CCL14</b>         | 0.04  | 8.54E-01 | -0.26 | 1.86E-01 |
| <b>GPATCH8</b>       | -0.22 | 2.60E-01 | -0.26 | 1.86E-01 |
| <b>HOXD8</b>         | -0.09 | 6.38E-01 | 0.26  | 1.86E-01 |
| <b>IFNGR2</b>        | 0.22  | 2.68E-01 | 0.26  | 1.86E-01 |
| <b>IL21R-AS1</b>     | 0.11  | 5.62E-01 | 0.26  | 1.86E-01 |
| <b>MAGIX</b>         | -0.01 | 9.60E-01 | -0.26 | 1.86E-01 |
| <b>OAZ2</b>          | 0.06  | 7.54E-01 | 0.26  | 1.86E-01 |

|                      |       |          |       |          |
|----------------------|-------|----------|-------|----------|
| <b>RAD54L2</b>       | -0.02 | 9.02E-01 | -0.26 | 1.86E-01 |
| <b>RP11-474C8.8</b>  | 0.15  | 4.51E-01 | -0.26 | 1.86E-01 |
| <b>SPOCK2</b>        | 0.27  | 1.72E-01 | 0.26  | 1.86E-01 |
| <b>TPD52</b>         | 0.34  | 7.44E-02 | 0.26  | 1.86E-01 |
| <b>CD8B</b>          | 0.09  | 6.42E-01 | 0.26  | 1.87E-01 |
| <b>CDKN1C</b>        | -0.24 | 2.23E-01 | 0.26  | 1.87E-01 |
| <b>FOSL2</b>         | -0.02 | 9.39E-01 | 0.26  | 1.87E-01 |
| <b>IGHG3</b>         | 0.31  | 1.05E-01 | 0.26  | 1.87E-01 |
| <b>OR7E91P</b>       | 0.39  | 3.79E-02 | 0.26  | 1.87E-01 |
| <b>RNU4-22P</b>      | -0.35 | 6.98E-02 | 0.26  | 1.87E-01 |
| <b>RNY1</b>          | 0.14  | 4.76E-01 | 0.26  | 1.87E-01 |
| <b>TMC4</b>          | 0.16  | 4.12E-01 | 0.26  | 1.87E-01 |
| <b>ZP4</b>           | 0.44  | 1.88E-02 | 0.26  | 1.87E-01 |
| <b>AC073130.1</b>    | -0.52 | 4.50E-03 | -0.26 | 1.87E-01 |
| <b>CLEC11A</b>       | -0.09 | 6.63E-01 | -0.26 | 1.87E-01 |
| <b>GLRA3</b>         | -0.40 | 3.45E-02 | -0.26 | 1.87E-01 |
| <b>KB-173C10.2</b>   | -0.16 | 4.04E-01 | -0.26 | 1.87E-01 |
| <b>PRKAA2</b>        | 0.05  | 8.12E-01 | -0.26 | 1.87E-01 |
| <b>RP11-113K21.6</b> | 0.21  | 2.80E-01 | -0.26 | 1.87E-01 |
| <b>RP11-267M23.1</b> | 0.05  | 8.18E-01 | -0.26 | 1.87E-01 |
| <b>RP11-411A19.5</b> | 0.42  | 2.78E-02 | -0.26 | 1.87E-01 |
| <b>ZNF829</b>        | 0.17  | 3.78E-01 | -0.26 | 1.87E-01 |
| <b>AC005076.5</b>    | -0.12 | 5.47E-01 | -0.26 | 1.87E-01 |
| <b>AGK</b>           | 0.17  | 3.82E-01 | -0.26 | 1.87E-01 |
| <b>CLEC2A</b>        | 0.05  | 8.07E-01 | -0.26 | 1.87E-01 |
| <b>CPNE4</b>         | -0.19 | 3.43E-01 | -0.26 | 1.87E-01 |
| <b>DDTL</b>          | 0.18  | 3.48E-01 | 0.26  | 1.87E-01 |
| <b>ELOVL2</b>        | -0.30 | 1.19E-01 | -0.26 | 1.87E-01 |
| <b>G24400</b>        | 0.32  | 9.68E-02 | 0.26  | 1.87E-01 |
| <b>MSTO2P</b>        | -0.08 | 6.94E-01 | -0.26 | 1.87E-01 |
| <b>RP11-392A14.9</b> | 0.08  | 6.91E-01 | -0.26 | 1.87E-01 |
| <b>RP11-73K9.2</b>   | 0.27  | 1.70E-01 | -0.26 | 1.87E-01 |
| <b>RP11-758M4.4</b>  | 0.02  | 9.03E-01 | 0.26  | 1.87E-01 |
| <b>RP4-671G15.2</b>  | 0.05  | 7.91E-01 | -0.26 | 1.87E-01 |
| <b>RUNX1T1</b>       | -0.24 | 2.25E-01 | 0.26  | 1.87E-01 |
| <b>SYT12</b>         | 0.27  | 1.58E-01 | 0.26  | 1.87E-01 |
| <b>WWTR1</b>         | 0.28  | 1.44E-01 | 0.26  | 1.87E-01 |
| <b>AC023481.1</b>    | 0.08  | 6.84E-01 | 0.26  | 1.88E-01 |
| <b>ATP1A1</b>        | 0.09  | 6.55E-01 | 0.26  | 1.88E-01 |
| <b>BSNDP2</b>        | -0.11 | 5.91E-01 | 0.26  | 1.88E-01 |
| <b>CEBPA</b>         | -0.08 | 6.95E-01 | -0.26 | 1.88E-01 |
| <b>CTD-2027I19.3</b> | -0.17 | 3.93E-01 | -0.26 | 1.88E-01 |
| <b>CTD-2201E9.3</b>  | -0.10 | 6.10E-01 | -0.26 | 1.88E-01 |
| <b>FAM71D</b>        | 0.00  | 9.97E-01 | -0.26 | 1.88E-01 |
| <b>HNRNPA3P7</b>     | -0.09 | 6.62E-01 | -0.26 | 1.88E-01 |
| <b>OTUB2</b>         | 0.26  | 1.85E-01 | 0.26  | 1.88E-01 |
| <b>RP11-160H22.5</b> | -0.10 | 6.08E-01 | -0.26 | 1.88E-01 |

|               |       |          |       |          |
|---------------|-------|----------|-------|----------|
| RP11-245D16.4 | 0.07  | 7.39E-01 | 0.26  | 1.88E-01 |
| RP11-304L19.3 | -0.21 | 2.83E-01 | 0.26  | 1.88E-01 |
| RP11-317B17.3 | -0.10 | 6.19E-01 | -0.26 | 1.88E-01 |
| RP11-369F10.2 | -0.20 | 3.10E-01 | 0.26  | 1.88E-01 |
| RP11-81A1.6   | -0.35 | 6.77E-02 | -0.26 | 1.88E-01 |
| RP3-429O6.1   | 0.01  | 9.66E-01 | -0.26 | 1.88E-01 |
| RP4-614O4.13  | -0.12 | 5.34E-01 | -0.26 | 1.88E-01 |
| XLOC_007667   | 0.15  | 4.46E-01 | 0.26  | 1.88E-01 |
| XLOC_014046   | -0.01 | 9.72E-01 | -0.26 | 1.88E-01 |
| ZNF419        | -0.40 | 3.70E-02 | -0.26 | 1.88E-01 |
| AD000864.6    | -0.07 | 7.28E-01 | 0.26  | 1.88E-01 |
| CTD-2235C13.1 | -0.18 | 3.52E-01 | 0.26  | 1.88E-01 |
| DPH6-AS1      | -0.05 | 8.16E-01 | -0.26 | 1.88E-01 |
| IFNA5         | 0.23  | 2.47E-01 | -0.26 | 1.88E-01 |
| KLHL3         | 0.31  | 1.08E-01 | 0.26  | 1.88E-01 |
| MCOLN1        | 0.01  | 9.76E-01 | 0.26  | 1.88E-01 |
| PGAM1P6       | 0.05  | 7.93E-01 | 0.26  | 1.88E-01 |
| PSPN          | -0.23 | 2.44E-01 | 0.26  | 1.88E-01 |
| RAB3D         | 0.26  | 1.77E-01 | 0.26  | 1.88E-01 |
| RN7SL170P     | -0.10 | 6.05E-01 | -0.26 | 1.88E-01 |
| RP11-383C5.3  | -0.21 | 2.88E-01 | -0.26 | 1.88E-01 |
| TAS2R43       | 0.06  | 7.63E-01 | 0.26  | 1.88E-01 |
| TRIM37        | -0.02 | 9.39E-01 | -0.26 | 1.88E-01 |
| ZC3H12A       | 0.38  | 4.81E-02 | 0.26  | 1.88E-01 |
| AC017104.6    | -0.42 | 2.73E-02 | -0.26 | 1.89E-01 |
| AP000251.3    | 0.15  | 4.41E-01 | -0.26 | 1.89E-01 |
| BORCS6        | 0.04  | 8.42E-01 | 0.26  | 1.89E-01 |
| C6orf25       | -0.28 | 1.53E-01 | -0.26 | 1.89E-01 |
| CALML3        | 0.39  | 3.94E-02 | 0.26  | 1.89E-01 |
| FAM110A       | -0.14 | 4.87E-01 | 0.26  | 1.89E-01 |
| GPR158        | -0.19 | 3.24E-01 | 0.26  | 1.89E-01 |
| HSD17B13      | -0.14 | 4.68E-01 | -0.26 | 1.89E-01 |
| IRX4          | 0.03  | 8.66E-01 | -0.26 | 1.89E-01 |
| KLHL7         | -0.10 | 6.19E-01 | -0.26 | 1.89E-01 |
| LINC00665     | -0.03 | 8.68E-01 | -0.26 | 1.89E-01 |
| MAST2         | -0.13 | 5.01E-01 | 0.26  | 1.89E-01 |
| MCIDAS        | -0.05 | 7.85E-01 | -0.26 | 1.89E-01 |
| MFSD12        | -0.29 | 1.36E-01 | -0.26 | 1.89E-01 |
| PRSS21        | 0.26  | 1.77E-01 | 0.26  | 1.89E-01 |
| RP11-107K17.2 | -0.03 | 8.89E-01 | -0.26 | 1.89E-01 |
| RP11-288K12.1 | 0.22  | 2.68E-01 | 0.26  | 1.89E-01 |
| RP11-382A20.4 | -0.21 | 2.76E-01 | -0.26 | 1.89E-01 |
| RP11-700J17.1 | 0.05  | 7.89E-01 | -0.26 | 1.89E-01 |
| RP3-382I10.7  | -0.01 | 9.75E-01 | -0.26 | 1.89E-01 |
| SAMMD15       | 0.34  | 8.10E-02 | 0.26  | 1.89E-01 |
| UTS2          | 0.21  | 2.80E-01 | -0.26 | 1.89E-01 |
| ADH5          | 0.31  | 1.09E-01 | 0.26  | 1.89E-01 |

|                      |       |          |       |          |
|----------------------|-------|----------|-------|----------|
| <b>C1QTNF3-AMACR</b> | -0.05 | 8.01E-01 | -0.26 | 1.89E-01 |
| <b>CELF3</b>         | 0.15  | 4.56E-01 | -0.26 | 1.89E-01 |
| <b>CYHR1</b>         | -0.06 | 7.78E-01 | 0.26  | 1.89E-01 |
| <b>FABP5P5</b>       | 0.10  | 6.22E-01 | 0.26  | 1.89E-01 |
| <b>KPRP</b>          | -0.02 | 9.24E-01 | 0.26  | 1.89E-01 |
| <b>MYPOP</b>         | -0.01 | 9.78E-01 | 0.26  | 1.89E-01 |
| <b>OR7E100P</b>      | 0.23  | 2.48E-01 | -0.26 | 1.89E-01 |
| <b>PCSK6</b>         | 0.37  | 5.16E-02 | 0.26  | 1.89E-01 |
| <b>PIP5KL1</b>       | -0.02 | 9.14E-01 | 0.26  | 1.89E-01 |
| <b>PSMB8-AS1</b>     | 0.13  | 5.07E-01 | 0.26  | 1.89E-01 |
| <b>RP11-115C21.2</b> | 0.04  | 8.45E-01 | 0.26  | 1.89E-01 |
| <b>RP11-122G18.7</b> | -0.19 | 3.26E-01 | 0.26  | 1.89E-01 |
| <b>RP11-353M9.1</b>  | -0.10 | 6.16E-01 | -0.26 | 1.89E-01 |
| <b>RP11-475O6.1</b>  | -0.29 | 1.40E-01 | -0.26 | 1.89E-01 |
| <b>RP11-745L13.2</b> | -0.01 | 9.49E-01 | -0.26 | 1.89E-01 |
| <b>RP11-777B9.1</b>  | -0.27 | 1.70E-01 | -0.26 | 1.89E-01 |
| <b>SIGLEC1</b>       | -0.09 | 6.41E-01 | 0.26  | 1.89E-01 |
| <b>UBXN7-AS1</b>     | 0.02  | 9.38E-01 | -0.26 | 1.89E-01 |
| <b>AC024896.1</b>    | 0.16  | 4.23E-01 | -0.26 | 1.90E-01 |
| <b>ACADSB</b>        | -0.07 | 7.30E-01 | -0.26 | 1.90E-01 |
| <b>C5orf28</b>       | 0.01  | 9.54E-01 | -0.26 | 1.90E-01 |
| <b>CCDC3</b>         | 0.11  | 5.64E-01 | 0.26  | 1.90E-01 |
| <b>CTD-3247F14.2</b> | -0.07 | 7.21E-01 | -0.26 | 1.90E-01 |
| <b>CTSW</b>          | 0.06  | 7.65E-01 | 0.26  | 1.90E-01 |
| <b>DPRXP3</b>        | 0.10  | 6.29E-01 | -0.26 | 1.90E-01 |
| <b>ECT2L</b>         | -0.09 | 6.56E-01 | -0.26 | 1.90E-01 |
| <b>FILIP1L</b>       | -0.09 | 6.50E-01 | -0.26 | 1.90E-01 |
| <b>GPD1L</b>         | -0.30 | 1.15E-01 | -0.26 | 1.90E-01 |
| <b>H3F3AP6</b>       | -0.04 | 8.50E-01 | 0.26  | 1.90E-01 |
| <b>IRF1</b>          | 0.11  | 5.90E-01 | 0.26  | 1.90E-01 |
| <b>MVK</b>           | 0.12  | 5.46E-01 | 0.26  | 1.90E-01 |
| <b>RGS9BP</b>        | -0.07 | 7.36E-01 | -0.26 | 1.90E-01 |
| <b>RNU6-711P</b>     | 0.00  | 9.89E-01 | -0.26 | 1.90E-01 |
| <b>SCN9A</b>         | -0.26 | 1.90E-01 | 0.26  | 1.90E-01 |
| <b>TRIM50</b>        | -0.02 | 9.13E-01 | 0.26  | 1.90E-01 |
| <b>TRMT2A</b>        | 0.14  | 4.90E-01 | 0.26  | 1.90E-01 |
| <b>USP25</b>         | 0.14  | 4.93E-01 | -0.26 | 1.90E-01 |
| <b>ZNF433</b>        | 0.00  | 9.83E-01 | 0.26  | 1.90E-01 |
| <b>ZRSR2</b>         | -0.45 | 1.60E-02 | -0.26 | 1.90E-01 |
| <b>AC004691.5</b>    | -0.13 | 5.07E-01 | -0.26 | 1.90E-01 |
| <b>C17orf97</b>      | 0.07  | 7.07E-01 | -0.26 | 1.90E-01 |
| <b>CTC-428H11.2</b>  | -0.05 | 8.16E-01 | -0.26 | 1.90E-01 |
| <b>CTD-2587H19.2</b> | -0.14 | 4.83E-01 | 0.26  | 1.90E-01 |
| <b>CTNNAL1</b>       | -0.23 | 2.48E-01 | -0.26 | 1.90E-01 |
| <b>GPANK1</b>        | 0.25  | 2.06E-01 | 0.26  | 1.90E-01 |
| <b>GPR37</b>         | 0.19  | 3.31E-01 | 0.26  | 1.90E-01 |
| <b>IPO13</b>         | 0.03  | 8.80E-01 | 0.26  | 1.90E-01 |



|                       |       |          |       |          |
|-----------------------|-------|----------|-------|----------|
| <b>NUTF2P6</b>        | 0.23  | 2.48E-01 | -0.26 | 1.90E-01 |
| <b>PLA2R1</b>         | 0.23  | 2.32E-01 | -0.26 | 1.90E-01 |
| <b>RP1-56K13.5</b>    | 0.14  | 4.75E-01 | -0.26 | 1.90E-01 |
| <b>RP11-473O4.5</b>   | 0.25  | 1.99E-01 | -0.26 | 1.90E-01 |
| <b>RP11-568N6.1</b>   | 0.19  | 3.24E-01 | -0.26 | 1.90E-01 |
| <b>SLC51A</b>         | -0.24 | 2.18E-01 | -0.26 | 1.90E-01 |
| <b>SNORD100</b>       | 0.19  | 3.39E-01 | -0.26 | 1.90E-01 |
| <b>TTY10</b>          | 0.43  | 2.35E-02 | 0.26  | 1.90E-01 |
| <b>ZNF529-AS1</b>     | -0.17 | 4.01E-01 | -0.26 | 1.90E-01 |
| <b>CNNM1</b>          | 0.18  | 3.51E-01 | -0.26 | 1.91E-01 |
| <b>FADS2P1</b>        | 0.22  | 2.66E-01 | 0.26  | 1.91E-01 |
| <b>GABRA2</b>         | 0.34  | 7.69E-02 | -0.26 | 1.91E-01 |
| <b>IRX6</b>           | 0.06  | 7.54E-01 | -0.26 | 1.91E-01 |
| <b>LINC01503</b>      | 0.17  | 3.96E-01 | 0.26  | 1.91E-01 |
| <b>MPEG1</b>          | 0.07  | 7.24E-01 | 0.26  | 1.91E-01 |
| <b>PAN3</b>           | -0.20 | 2.98E-01 | -0.26 | 1.91E-01 |
| <b>RP11-1149O23.3</b> | 0.31  | 1.14E-01 | 0.26  | 1.91E-01 |
| <b>SNORA36B</b>       | -0.15 | 4.52E-01 | 0.26  | 1.91E-01 |
| <b>ZNF839</b>         | -0.15 | 4.44E-01 | -0.26 | 1.91E-01 |
| <b>ADCY9</b>          | -0.09 | 6.63E-01 | 0.26  | 1.91E-01 |
| <b>CERK</b>           | 0.07  | 7.38E-01 | 0.26  | 1.91E-01 |
| <b>LINC00853</b>      | -0.25 | 2.01E-01 | 0.26  | 1.91E-01 |
| <b>PDE10A</b>         | -0.35 | 6.68E-02 | 0.26  | 1.91E-01 |
| <b>SNORD114-1</b>     | -0.11 | 5.70E-01 | 0.26  | 1.91E-01 |
| <b>ATAD5</b>          | 0.05  | 7.97E-01 | -0.26 | 1.91E-01 |
| <b>CCDC178</b>        | 0.00  | 9.85E-01 | -0.26 | 1.91E-01 |
| <b>INHA</b>           | -0.16 | 4.28E-01 | -0.26 | 1.91E-01 |
| <b>KIAA2026</b>       | -0.29 | 1.36E-01 | -0.26 | 1.91E-01 |
| <b>KNOP1P2</b>        | -0.12 | 5.55E-01 | -0.26 | 1.91E-01 |
| <b>MYL3</b>           | -0.15 | 4.36E-01 | -0.26 | 1.91E-01 |
| <b>PET117</b>         | 0.08  | 6.86E-01 | -0.26 | 1.91E-01 |
| <b>RP11-267M23.4</b>  | -0.19 | 3.35E-01 | -0.26 | 1.91E-01 |
| <b>RP11-408H20.3</b>  | -0.05 | 8.04E-01 | -0.26 | 1.91E-01 |
| <b>RP11-575L7.4</b>   | -0.18 | 3.49E-01 | -0.26 | 1.91E-01 |
| <b>RP5-945I17.2</b>   | 0.09  | 6.39E-01 | -0.26 | 1.91E-01 |
| <b>RPA3</b>           | 0.18  | 3.53E-01 | -0.26 | 1.91E-01 |
| <b>SOX5</b>           | -0.06 | 7.66E-01 | -0.26 | 1.91E-01 |
| <b>BRAT1</b>          | -0.11 | 5.79E-01 | 0.26  | 1.92E-01 |
| <b>CASP6</b>          | 0.05  | 7.88E-01 | 0.26  | 1.92E-01 |
| <b>CDK19</b>          | -0.07 | 7.36E-01 | 0.26  | 1.92E-01 |
| <b>DNAJC10</b>        | 0.02  | 9.16E-01 | -0.26 | 1.92E-01 |
| <b>DYNC2LI1</b>       | 0.06  | 7.70E-01 | -0.26 | 1.92E-01 |
| <b>FAM72A</b>         | -0.22 | 2.65E-01 | 0.26  | 1.92E-01 |
| <b>GNL3L</b>          | -0.05 | 8.13E-01 | 0.26  | 1.92E-01 |
| <b>MS4A4A</b>         | -0.07 | 7.40E-01 | 0.26  | 1.92E-01 |
| <b>PLAUR</b>          | 0.16  | 4.23E-01 | 0.26  | 1.92E-01 |
| <b>PPIAP11</b>        | -0.20 | 2.97E-01 | 0.26  | 1.92E-01 |

|                |       |          |       |          |
|----------------|-------|----------|-------|----------|
| PSKH1          | 0.01  | 9.74E-01 | 0.26  | 1.92E-01 |
| PUDPP2         | 0.10  | 6.13E-01 | -0.26 | 1.92E-01 |
| RP11-115H13.1  | 0.40  | 3.47E-02 | 0.26  | 1.92E-01 |
| RP11-1379J22.5 | -0.13 | 5.21E-01 | 0.26  | 1.92E-01 |
| RP11-494M8.4   | -0.23 | 2.48E-01 | -0.26 | 1.92E-01 |
| TCEAL1         | -0.08 | 6.80E-01 | -0.26 | 1.92E-01 |
| TMEM117        | 0.28  | 1.56E-01 | 0.26  | 1.92E-01 |
| ZNF287         | -0.16 | 4.23E-01 | -0.26 | 1.92E-01 |
| ABHD17AP3      | 0.15  | 4.54E-01 | -0.26 | 1.93E-01 |
| AKAP5          | 0.10  | 6.23E-01 | -0.26 | 1.93E-01 |
| DOC2B          | 0.07  | 7.07E-01 | 0.26  | 1.93E-01 |
| FAM167A        | -0.15 | 4.43E-01 | 0.26  | 1.93E-01 |
| FCER2          | -0.27 | 1.65E-01 | 0.26  | 1.93E-01 |
| GHDC           | 0.18  | 3.69E-01 | 0.26  | 1.93E-01 |
| LINC01585      | 0.00  | 9.85E-01 | -0.26 | 1.93E-01 |
| LRP10          | 0.31  | 1.11E-01 | 0.26  | 1.93E-01 |
| PLAC8L1        | -0.27 | 1.60E-01 | -0.26 | 1.93E-01 |
| RFK            | 0.05  | 7.89E-01 | -0.26 | 1.93E-01 |
| RNU6-155P      | -0.16 | 4.10E-01 | -0.26 | 1.93E-01 |
| RP11-305E6.4   | -0.21 | 2.80E-01 | -0.26 | 1.93E-01 |
| RP11-45A17.3   | -0.19 | 3.29E-01 | 0.26  | 1.93E-01 |
| RP11-498C9.15  | 0.27  | 1.63E-01 | -0.26 | 1.93E-01 |
| SH2D2A         | 0.31  | 1.14E-01 | 0.26  | 1.93E-01 |
| SNX27          | -0.06 | 7.78E-01 | -0.26 | 1.93E-01 |
| WDR41          | -0.06 | 7.75E-01 | -0.26 | 1.93E-01 |
| AC046143.3     | -0.04 | 8.54E-01 | 0.26  | 1.93E-01 |
| C2orf74        | -0.13 | 5.17E-01 | 0.26  | 1.93E-01 |
| FUZ            | 0.29  | 1.41E-01 | 0.26  | 1.93E-01 |
| GSS            | -0.04 | 8.57E-01 | 0.26  | 1.93E-01 |
| NEK6           | 0.05  | 8.10E-01 | 0.26  | 1.93E-01 |
| PLEKHG2        | 0.12  | 5.50E-01 | 0.26  | 1.93E-01 |
| RELL1          | -0.26 | 1.83E-01 | -0.26 | 1.93E-01 |
| RP11-2N1.1     | -0.19 | 3.32E-01 | -0.26 | 1.93E-01 |
| RP11-812E19.3  | 0.08  | 7.02E-01 | 0.26  | 1.93E-01 |
| RP3-399L15.3   | 0.00  | 9.93E-01 | -0.26 | 1.93E-01 |
| RP4-758J18.10  | 0.21  | 2.94E-01 | 0.26  | 1.93E-01 |
| SLC25A38       | 0.00  | 9.86E-01 | 0.26  | 1.93E-01 |
| TECR           | -0.06 | 7.71E-01 | 0.26  | 1.93E-01 |
| TTF1           | -0.07 | 7.19E-01 | -0.26 | 1.93E-01 |
| ZNF592         | 0.02  | 9.27E-01 | 0.26  | 1.93E-01 |
| AC008738.2     | -0.07 | 7.28E-01 | -0.26 | 1.94E-01 |
| BIRC6-AS1      | -0.11 | 5.90E-01 | -0.26 | 1.94E-01 |
| C1QTNF1-AS1    | 0.15  | 4.36E-01 | 0.26  | 1.94E-01 |
| G40216         | -0.17 | 3.92E-01 | -0.26 | 1.94E-01 |
| HYMAI          | -0.44 | 1.90E-02 | -0.26 | 1.94E-01 |
| IKBKAP         | -0.05 | 8.00E-01 | -0.26 | 1.94E-01 |
| MTMR4          | 0.05  | 7.96E-01 | 0.26  | 1.94E-01 |

|                      |       |          |       |          |
|----------------------|-------|----------|-------|----------|
| <b>RORA-AS1</b>      | -0.36 | 6.24E-02 | -0.26 | 1.94E-01 |
| <b>RP11-757F18.5</b> | -0.25 | 2.06E-01 | -0.26 | 1.94E-01 |
| <b>RP11-817O13.8</b> | 0.33  | 9.12E-02 | 0.26  | 1.94E-01 |
| <b>RP11-85O21.2</b>  | -0.36 | 5.86E-02 | -0.26 | 1.94E-01 |
| <b>SNRNP27</b>       | -0.24 | 2.21E-01 | -0.26 | 1.94E-01 |
| <b>THRAP3</b>        | 0.08  | 6.89E-01 | -0.26 | 1.94E-01 |
| <b>ZNF160</b>        | -0.24 | 2.13E-01 | -0.26 | 1.94E-01 |
| <b>ZNF805</b>        | -0.06 | 7.53E-01 | -0.26 | 1.94E-01 |
| <b>CTD-2184D3.1</b>  | -0.10 | 6.30E-01 | -0.26 | 1.94E-01 |
| <b>DLGAP1-AS1</b>    | 0.04  | 8.25E-01 | 0.26  | 1.94E-01 |
| <b>DMBX1</b>         | 0.22  | 2.62E-01 | -0.26 | 1.94E-01 |
| <b>FYB</b>           | 0.01  | 9.40E-01 | 0.26  | 1.94E-01 |
| <b>IPP</b>           | -0.03 | 8.77E-01 | 0.26  | 1.94E-01 |
| <b>PADI1</b>         | -0.10 | 6.14E-01 | 0.26  | 1.94E-01 |
| <b>PRR19</b>         | 0.32  | 1.01E-01 | 0.26  | 1.94E-01 |
| <b>QPCTL</b>         | 0.14  | 4.74E-01 | 0.26  | 1.94E-01 |
| <b>RP11-18H21.1</b>  | 0.24  | 2.24E-01 | 0.26  | 1.94E-01 |
| <b>RP11-345P4.7</b>  | 0.30  | 1.16E-01 | -0.26 | 1.94E-01 |
| <b>RP11-354E23.5</b> | -0.23 | 2.38E-01 | -0.26 | 1.94E-01 |
| <b>RPL7AP28</b>      | 0.00  | 9.99E-01 | -0.26 | 1.94E-01 |
| <b>RPS6KA2</b>       | 0.13  | 5.12E-01 | 0.26  | 1.94E-01 |
| <b>SDHAF2</b>        | 0.20  | 2.96E-01 | 0.26  | 1.94E-01 |
| <b>SLC4A5</b>        | -0.16 | 4.12E-01 | -0.26 | 1.94E-01 |
| <b>CTB-55O6.8</b>    | -0.24 | 2.14E-01 | -0.26 | 1.95E-01 |
| <b>EBF4</b>          | 0.37  | 5.40E-02 | 0.26  | 1.95E-01 |
| <b>LPAR4</b>         | -0.25 | 1.99E-01 | 0.26  | 1.95E-01 |
| <b>MLIP</b>          | 0.07  | 7.21E-01 | 0.26  | 1.95E-01 |
| <b>NRROS</b>         | -0.14 | 4.88E-01 | 0.26  | 1.95E-01 |
| <b>RIPK2</b>         | -0.25 | 1.91E-01 | -0.26 | 1.95E-01 |
| <b>RP11-159D12.2</b> | -0.24 | 2.18E-01 | -0.26 | 1.95E-01 |
| <b>RP11-463J10.2</b> | -0.12 | 5.29E-01 | 0.26  | 1.95E-01 |
| <b>RP11-513D5.5</b>  | -0.02 | 9.01E-01 | 0.26  | 1.95E-01 |
| <b>RP11-61J19.4</b>  | 0.05  | 7.96E-01 | 0.26  | 1.95E-01 |
| <b>RPL9P2</b>        | -0.33 | 9.07E-02 | -0.26 | 1.95E-01 |
| <b>RPS26P6</b>       | -0.08 | 6.95E-01 | -0.26 | 1.95E-01 |
| <b>RPS3P1</b>        | -0.17 | 3.86E-01 | 0.26  | 1.95E-01 |
| <b>RSRC2</b>         | -0.10 | 6.07E-01 | -0.26 | 1.95E-01 |
| <b>SQSTM1</b>        | -0.10 | 6.02E-01 | 0.26  | 1.95E-01 |
| <b>TIGD2</b>         | 0.07  | 7.32E-01 | 0.26  | 1.95E-01 |
| <b>TM4SF1-AS1</b>    | -0.04 | 8.50E-01 | -0.26 | 1.95E-01 |
| <b>BCOR</b>          | 0.08  | 6.87E-01 | 0.26  | 1.95E-01 |
| <b>MROH1</b>         | 0.04  | 8.53E-01 | 0.26  | 1.95E-01 |
| <b>RP11-10A14.3</b>  | 0.17  | 3.91E-01 | 0.26  | 1.95E-01 |
| <b>SNORA20</b>       | 0.19  | 3.44E-01 | 0.26  | 1.95E-01 |
| <b>SRRM3</b>         | 0.15  | 4.49E-01 | 0.26  | 1.95E-01 |
| <b>AC073626.2</b>    | -0.03 | 8.91E-01 | -0.26 | 1.95E-01 |
| <b>ARHGAP8</b>       | -0.17 | 3.79E-01 | -0.26 | 1.95E-01 |

|                       |       |          |       |          |
|-----------------------|-------|----------|-------|----------|
| <b>CH17-264L24.1</b>  | -0.10 | 6.13E-01 | -0.26 | 1.95E-01 |
| <b>DLEU7-AS1</b>      | -0.05 | 7.94E-01 | -0.26 | 1.95E-01 |
| <b>KCNE1</b>          | -0.22 | 2.55E-01 | -0.26 | 1.95E-01 |
| <b>LA16c-395F10.2</b> | -0.17 | 3.98E-01 | -0.26 | 1.95E-01 |
| <b>MANEA-AS1</b>      | -0.22 | 2.51E-01 | -0.26 | 1.95E-01 |
| <b>RN7SKP198</b>      | -0.21 | 2.88E-01 | -0.26 | 1.95E-01 |
| <b>RP11-298I3.1</b>   | 0.19  | 3.31E-01 | -0.26 | 1.95E-01 |
| <b>TFB2M</b>          | 0.11  | 5.69E-01 | -0.26 | 1.95E-01 |
| <b>CDC42EP3</b>       | 0.21  | 2.73E-01 | -0.26 | 1.96E-01 |
| <b>CEBPG</b>          | 0.13  | 5.08E-01 | -0.26 | 1.96E-01 |
| <b>CELP</b>           | -0.21 | 2.93E-01 | -0.26 | 1.96E-01 |
| <b>LINC01449</b>      | -0.18 | 3.72E-01 | -0.26 | 1.96E-01 |
| <b>RP11-816J6.3</b>   | -0.20 | 3.14E-01 | -0.26 | 1.96E-01 |
| <b>SLITRK2</b>        | -0.30 | 1.25E-01 | -0.26 | 1.96E-01 |
| <b>AC104135.2</b>     | -0.04 | 8.41E-01 | 0.26  | 1.96E-01 |
| <b>EPN3</b>           | 0.37  | 5.01E-02 | 0.26  | 1.96E-01 |
| <b>FKBP1B</b>         | 0.14  | 4.65E-01 | 0.26  | 1.96E-01 |
| <b>G10695</b>         | 0.03  | 8.62E-01 | 0.26  | 1.96E-01 |
| <b>GPR132</b>         | 0.18  | 3.55E-01 | 0.26  | 1.96E-01 |
| <b>KRTAP10-3</b>      | -0.07 | 7.14E-01 | 0.26  | 1.96E-01 |
| <b>ROM1</b>           | 0.09  | 6.36E-01 | 0.26  | 1.96E-01 |
| <b>RP11-62G11.1</b>   | -0.15 | 4.44E-01 | 0.26  | 1.96E-01 |
| <b>TCAIM</b>          | 0.23  | 2.45E-01 | 0.26  | 1.96E-01 |
| <b>VSIG4</b>          | -0.01 | 9.55E-01 | 0.26  | 1.96E-01 |
| <b>ZC3H12D</b>        | 0.29  | 1.35E-01 | 0.26  | 1.96E-01 |
| <b>AC004980.10</b>    | 0.02  | 9.05E-01 | 0.26  | 1.96E-01 |
| <b>CTB-152G17.4</b>   | -0.18 | 3.63E-01 | 0.26  | 1.96E-01 |
| <b>CTD-2267D19.4</b>  | -0.11 | 5.73E-01 | 0.26  | 1.96E-01 |
| <b>G6PD</b>           | 0.19  | 3.25E-01 | 0.26  | 1.96E-01 |
| <b>GSTM5</b>          | -0.43 | 2.18E-02 | -0.26 | 1.96E-01 |
| <b>KIF2C</b>          | 0.13  | 5.02E-01 | 0.26  | 1.96E-01 |
| <b>KLF11</b>          | -0.16 | 4.25E-01 | -0.26 | 1.96E-01 |
| <b>MIR1972-2</b>      | -0.22 | 2.56E-01 | -0.26 | 1.96E-01 |
| <b>MUM1L1</b>         | 0.04  | 8.37E-01 | -0.26 | 1.96E-01 |
| <b>RNA5SP465</b>      | -0.22 | 2.58E-01 | 0.26  | 1.96E-01 |
| <b>RP11-159G9.5</b>   | 0.06  | 7.51E-01 | 0.26  | 1.96E-01 |
| <b>SEC62</b>          | -0.13 | 5.26E-01 | -0.26 | 1.96E-01 |
| <b>TEC</b>            | 0.04  | 8.46E-01 | -0.26 | 1.96E-01 |
| <b>UPF3BP2</b>        | -0.21 | 2.89E-01 | -0.26 | 1.96E-01 |
| <b>XLOC_004671</b>    | -0.09 | 6.35E-01 | -0.26 | 1.96E-01 |
| <b>AC005159.1</b>     | -0.16 | 4.07E-01 | -0.26 | 1.97E-01 |
| <b>AP4B1-AS1</b>      | -0.18 | 3.57E-01 | -0.26 | 1.97E-01 |
| <b>B3GNTL1</b>        | 0.01  | 9.58E-01 | -0.26 | 1.97E-01 |
| <b>CASP7</b>          | 0.07  | 7.10E-01 | 0.26  | 1.97E-01 |
| <b>CTA-243E7.1</b>    | -0.24 | 2.14E-01 | -0.26 | 1.97E-01 |
| <b>DENND5B</b>        | -0.31 | 1.09E-01 | -0.26 | 1.97E-01 |
| <b>FANCM</b>          | 0.15  | 4.38E-01 | -0.26 | 1.97E-01 |

|               |       |          |       |          |
|---------------|-------|----------|-------|----------|
| G23772        | -0.28 | 1.50E-01 | -0.26 | 1.97E-01 |
| GUF1          | 0.10  | 6.04E-01 | -0.26 | 1.97E-01 |
| LIMK1         | 0.10  | 6.10E-01 | 0.26  | 1.97E-01 |
| MSS51         | 0.16  | 4.20E-01 | -0.26 | 1.97E-01 |
| PAG1          | 0.05  | 8.04E-01 | -0.26 | 1.97E-01 |
| PNOC          | -0.13 | 5.05E-01 | -0.26 | 1.97E-01 |
| RNU1-27P      | -0.10 | 6.19E-01 | 0.26  | 1.97E-01 |
| RP11-123O10.3 | -0.07 | 7.30E-01 | -0.26 | 1.97E-01 |
| RP11-266K4.9  | -0.30 | 1.23E-01 | -0.26 | 1.97E-01 |
| RP11-552M11.8 | -0.30 | 1.23E-01 | -0.26 | 1.97E-01 |
| RPL12P35      | -0.01 | 9.61E-01 | 0.26  | 1.97E-01 |
| SH3GL1P1      | 0.29  | 1.28E-01 | 0.26  | 1.97E-01 |
| SNORA71B      | 0.16  | 4.22E-01 | 0.26  | 1.97E-01 |
| SPRR3         | 0.14  | 4.75E-01 | 0.26  | 1.97E-01 |
| THEMIS        | 0.23  | 2.33E-01 | 0.26  | 1.97E-01 |
| TMCO4         | -0.01 | 9.48E-01 | 0.26  | 1.97E-01 |
| ZNF415P1      | -0.10 | 5.95E-01 | 0.26  | 1.97E-01 |
| AC005618.6    | 0.19  | 3.44E-01 | -0.26 | 1.98E-01 |
| C3orf18       | 0.05  | 7.88E-01 | 0.26  | 1.98E-01 |
| G26744        | -0.20 | 3.17E-01 | -0.26 | 1.98E-01 |
| G38114        | -0.22 | 2.56E-01 | -0.26 | 1.98E-01 |
| GUCY1B3       | -0.50 | 6.54E-03 | -0.26 | 1.98E-01 |
| HPGDS         | -0.26 | 1.84E-01 | -0.26 | 1.98E-01 |
| KLHL30        | -0.10 | 6.23E-01 | 0.26  | 1.98E-01 |
| MIR5683       | 0.04  | 8.45E-01 | 0.26  | 1.98E-01 |
| NAT14         | -0.04 | 8.33E-01 | -0.26 | 1.98E-01 |
| RN7SL225P     | -0.11 | 5.87E-01 | -0.26 | 1.98E-01 |
| RP11-22B23.1  | 0.02  | 9.26E-01 | 0.26  | 1.98E-01 |
| RP11-467H10.2 | -0.09 | 6.51E-01 | -0.26 | 1.98E-01 |
| RP11-60C6.5   | -0.11 | 5.81E-01 | -0.26 | 1.98E-01 |
| SLC2A8        | 0.08  | 6.68E-01 | 0.26  | 1.98E-01 |
| TNIP2         | 0.06  | 7.44E-01 | 0.26  | 1.98E-01 |
| APOE          | 0.15  | 4.50E-01 | -0.26 | 1.98E-01 |
| BFSP1         | 0.11  | 5.91E-01 | 0.26  | 1.98E-01 |
| BMX           | 0.33  | 8.81E-02 | 0.26  | 1.98E-01 |
| CARD18        | 0.23  | 2.47E-01 | -0.26 | 1.98E-01 |
| CHRNE         | -0.15 | 4.44E-01 | 0.26  | 1.98E-01 |
| ERI2          | 0.20  | 3.05E-01 | 0.26  | 1.98E-01 |
| FKBP8         | 0.08  | 6.75E-01 | 0.26  | 1.98E-01 |
| HAS2-AS1      | -0.42 | 2.48E-02 | 0.26  | 1.98E-01 |
| LRP4          | -0.14 | 4.86E-01 | 0.26  | 1.98E-01 |
| MIR3157       | -0.17 | 3.74E-01 | -0.26 | 1.98E-01 |
| NELL1         | -0.08 | 7.00E-01 | -0.26 | 1.98E-01 |
| RDH16         | 0.08  | 6.75E-01 | 0.26  | 1.98E-01 |
| RP11-15I20.1  | -0.05 | 7.94E-01 | 0.26  | 1.98E-01 |
| ST6GALNAC3    | -0.32 | 9.99E-02 | 0.26  | 1.98E-01 |
| USP1          | 0.06  | 7.64E-01 | -0.26 | 1.98E-01 |

|               |       |          |       |          |
|---------------|-------|----------|-------|----------|
| ZNF117        | 0.13  | 5.17E-01 | -0.26 | 1.98E-01 |
| AFF3          | -0.38 | 4.62E-02 | -0.26 | 1.99E-01 |
| ATP1A4        | 0.03  | 8.81E-01 | 0.26  | 1.99E-01 |
| BLZF2P        | -0.18 | 3.72E-01 | -0.26 | 1.99E-01 |
| COL4A3        | -0.31 | 1.08E-01 | 0.26  | 1.99E-01 |
| DCP1A         | -0.01 | 9.67E-01 | -0.26 | 1.99E-01 |
| HAUS1P1       | -0.42 | 2.53E-02 | 0.26  | 1.99E-01 |
| HTRA1         | 0.12  | 5.40E-01 | 0.26  | 1.99E-01 |
| NRAV          | 0.14  | 4.73E-01 | 0.26  | 1.99E-01 |
| NRIP1         | 0.36  | 5.76E-02 | -0.26 | 1.99E-01 |
| RP11-109A6.2  | 0.08  | 7.00E-01 | -0.26 | 1.99E-01 |
| RP11-120M18.2 | -0.14 | 4.70E-01 | -0.26 | 1.99E-01 |
| RP11-697K23.3 | -0.01 | 9.40E-01 | 0.26  | 1.99E-01 |
| RP11-76C10.6  | -0.03 | 8.79E-01 | -0.26 | 1.99E-01 |
| RP3-431P23.5  | 0.20  | 3.12E-01 | 0.26  | 1.99E-01 |
| RPL7P16       | 0.06  | 7.76E-01 | 0.26  | 1.99E-01 |
| RRAS          | 0.08  | 7.01E-01 | 0.26  | 1.99E-01 |
| SH2D1A        | 0.21  | 2.88E-01 | 0.26  | 1.99E-01 |
| TRIM60P18     | 0.07  | 7.39E-01 | -0.26 | 1.99E-01 |
| ACAP2-IT1     | 0.23  | 2.44E-01 | -0.26 | 1.99E-01 |
| ACKR4         | 0.11  | 5.61E-01 | 0.26  | 1.99E-01 |
| CCDC137       | 0.33  | 8.75E-02 | 0.26  | 1.99E-01 |
| CRAT          | -0.01 | 9.71E-01 | -0.26 | 1.99E-01 |
| ESPL1         | 0.01  | 9.65E-01 | -0.26 | 1.99E-01 |
| FOXK2         | 0.21  | 2.85E-01 | 0.26  | 1.99E-01 |
| FRYL          | -0.19 | 3.36E-01 | -0.26 | 1.99E-01 |
| G26207        | -0.04 | 8.23E-01 | -0.26 | 1.99E-01 |
| LA16c-380F5.3 | 0.28  | 1.42E-01 | 0.26  | 1.99E-01 |
| LLNLR-304A6.2 | -0.05 | 7.96E-01 | 0.26  | 1.99E-01 |
| NPHP1         | -0.10 | 6.06E-01 | -0.26 | 1.99E-01 |
| PCDH7         | 0.05  | 8.15E-01 | 0.26  | 1.99E-01 |
| PSAP          | 0.04  | 8.21E-01 | 0.26  | 1.99E-01 |
| RP11-392B6.1  | 0.09  | 6.52E-01 | -0.26 | 1.99E-01 |
| XLOC_003663   | -0.11 | 5.64E-01 | 0.26  | 1.99E-01 |
| AP000240.9    | 0.15  | 4.34E-01 | -0.25 | 2.00E-01 |
| BANF1P2       | 0.30  | 1.21E-01 | 0.25  | 2.00E-01 |
| CTC-499B15.8  | 0.04  | 8.39E-01 | 0.25  | 2.00E-01 |
| ETFA          | 0.02  | 9.20E-01 | -0.25 | 2.00E-01 |
| HMBOX1        | -0.24 | 2.27E-01 | -0.25 | 2.00E-01 |
| IL19          | 0.17  | 3.91E-01 | 0.25  | 2.00E-01 |
| MGC16275      | 0.18  | 3.60E-01 | -0.25 | 2.00E-01 |
| RP11-229O3.1  | -0.27 | 1.67E-01 | 0.25  | 2.00E-01 |
| RP11-490B18.5 | 0.02  | 9.35E-01 | 0.25  | 2.00E-01 |
| RPS23P5       | 0.09  | 6.44E-01 | -0.25 | 2.00E-01 |
| SAFB          | -0.01 | 9.46E-01 | 0.25  | 2.00E-01 |
| TMC7          | 0.20  | 2.98E-01 | 0.25  | 2.00E-01 |
| TNRC6C-AS1    | 0.29  | 1.28E-01 | 0.25  | 2.00E-01 |

|               |       |          |       |          |
|---------------|-------|----------|-------|----------|
| ZNF362        | -0.17 | 3.89E-01 | 0.25  | 2.00E-01 |
| ADH4          | 0.08  | 7.02E-01 | -0.25 | 2.00E-01 |
| AL162424.1    | 0.00  | 9.81E-01 | -0.25 | 2.00E-01 |
| C10orf10      | -0.25 | 1.99E-01 | 0.25  | 2.00E-01 |
| CTD-3239E11.2 | 0.22  | 2.56E-01 | -0.25 | 2.00E-01 |
| F10           | 0.00  | 9.85E-01 | 0.25  | 2.00E-01 |
| GATA5         | 0.06  | 7.73E-01 | 0.25  | 2.00E-01 |
| HARBI1        | 0.22  | 2.59E-01 | 0.25  | 2.00E-01 |
| LINC01569     | 0.19  | 3.41E-01 | 0.25  | 2.00E-01 |
| MAATS1        | -0.15 | 4.58E-01 | -0.25 | 2.00E-01 |
| MLLT3         | 0.20  | 3.01E-01 | 0.25  | 2.00E-01 |
| RC3H2         | 0.26  | 1.78E-01 | 0.25  | 2.00E-01 |
| RFWD3         | 0.09  | 6.48E-01 | 0.25  | 2.00E-01 |
| RHOV          | 0.21  | 2.73E-01 | 0.25  | 2.00E-01 |
| RP11-361F15.5 | -0.15 | 4.35E-01 | -0.25 | 2.00E-01 |
| RP11-400F19.6 | 0.17  | 3.94E-01 | 0.25  | 2.00E-01 |
| RP11-59H7.3   | 0.06  | 7.78E-01 | -0.25 | 2.00E-01 |
| RP11-804N13.1 | 0.01  | 9.70E-01 | -0.25 | 2.00E-01 |
| SLC29A4       | 0.39  | 4.20E-02 | 0.25  | 2.00E-01 |
| SMARCA4       | 0.06  | 7.72E-01 | 0.25  | 2.00E-01 |
| SNORD9        | 0.05  | 7.91E-01 | 0.25  | 2.00E-01 |
| SNORD99       | 0.26  | 1.80E-01 | -0.25 | 2.00E-01 |
| TSC22D1       | -0.08 | 6.88E-01 | -0.25 | 2.00E-01 |
| ZSCAN9        | 0.02  | 9.17E-01 | -0.25 | 2.00E-01 |
| AC012370.2    | -0.15 | 4.60E-01 | 0.25  | 2.01E-01 |
| AWAT1         | -0.01 | 9.47E-01 | -0.25 | 2.01E-01 |
| CTB-63M22.1   | -0.05 | 8.16E-01 | 0.25  | 2.01E-01 |
| CTC-297N7.9   | 0.01  | 9.43E-01 | -0.25 | 2.01E-01 |
| DSCC1         | 0.11  | 5.69E-01 | -0.25 | 2.01E-01 |
| LINC01527     | 0.35  | 7.08E-02 | 0.25  | 2.01E-01 |
| MIR4767       | -0.01 | 9.75E-01 | 0.25  | 2.01E-01 |
| PPP4R4        | -0.16 | 4.26E-01 | -0.25 | 2.01E-01 |
| RP11-167P22.3 | 0.18  | 3.57E-01 | -0.25 | 2.01E-01 |
| RP11-307C19.2 | -0.32 | 1.01E-01 | -0.25 | 2.01E-01 |
| RP11-548P2.2  | -0.19 | 3.23E-01 | -0.25 | 2.01E-01 |
| RP11-801G16.2 | -0.05 | 8.12E-01 | -0.25 | 2.01E-01 |
| AK6           | -0.01 | 9.58E-01 | -0.25 | 2.01E-01 |
| AP001439.2    | 0.00  | 9.97E-01 | -0.25 | 2.01E-01 |
| DIAPH3-AS2    | -0.26 | 1.87E-01 | -0.25 | 2.01E-01 |
| GYPE          | -0.13 | 5.15E-01 | -0.25 | 2.01E-01 |
| RP11-240G22.5 | 0.27  | 1.65E-01 | -0.25 | 2.01E-01 |
| RP11-372K14.2 | -0.08 | 6.95E-01 | -0.25 | 2.01E-01 |
| RP11-530N7.3  | -0.14 | 4.75E-01 | -0.25 | 2.01E-01 |
| RP11-723J4.3  | -0.42 | 2.52E-02 | -0.25 | 2.01E-01 |
| CD53          | 0.17  | 3.89E-01 | 0.25  | 2.01E-01 |
| CLEC4G        | 0.07  | 7.36E-01 | 0.25  | 2.01E-01 |
| DAPK3         | -0.01 | 9.56E-01 | 0.25  | 2.01E-01 |

|               |       |          |       |          |
|---------------|-------|----------|-------|----------|
| PNPLA6        | 0.29  | 1.31E-01 | 0.25  | 2.01E-01 |
| RP11-452L6.7  | 0.24  | 2.22E-01 | 0.25  | 2.01E-01 |
| SLC7A7        | 0.41  | 2.90E-02 | 0.25  | 2.01E-01 |
| UBAP2L        | 0.08  | 6.87E-01 | 0.25  | 2.01E-01 |
| AC104134.2    | -0.15 | 4.44E-01 | -0.25 | 2.02E-01 |
| CEP78         | 0.14  | 4.63E-01 | -0.25 | 2.02E-01 |
| EEF1A1P22     | 0.22  | 2.53E-01 | -0.25 | 2.02E-01 |
| ENPP1         | -0.14 | 4.81E-01 | -0.25 | 2.02E-01 |
| FUT2          | -0.05 | 7.92E-01 | 0.25  | 2.02E-01 |
| G32331        | 0.03  | 8.76E-01 | 0.25  | 2.02E-01 |
| G3405         | -0.03 | 8.79E-01 | -0.25 | 2.02E-01 |
| MAP3K13       | -0.08 | 6.77E-01 | -0.25 | 2.02E-01 |
| MC1R          | -0.18 | 3.68E-01 | -0.25 | 2.02E-01 |
| PIWIL2        | -0.06 | 7.52E-01 | -0.25 | 2.02E-01 |
| RINL          | 0.09  | 6.35E-01 | -0.25 | 2.02E-01 |
| RNF103        | -0.01 | 9.51E-01 | -0.25 | 2.02E-01 |
| RP11-148K1.12 | -0.24 | 2.10E-01 | -0.25 | 2.02E-01 |
| RP3-522J7.5   | -0.19 | 3.37E-01 | -0.25 | 2.02E-01 |
| SCN1B         | -0.22 | 2.56E-01 | 0.25  | 2.02E-01 |
| TG            | -0.37 | 5.35E-02 | -0.25 | 2.02E-01 |
| ZMYND11       | 0.16  | 4.23E-01 | -0.25 | 2.02E-01 |
| AC084117.3    | 0.15  | 4.61E-01 | 0.25  | 2.03E-01 |
| ATP6V0D1      | 0.38  | 4.59E-02 | 0.25  | 2.03E-01 |
| CLC           | -0.25 | 2.09E-01 | 0.25  | 2.03E-01 |
| LOXL1-AS1     | 0.20  | 3.13E-01 | 0.25  | 2.03E-01 |
| RP11-345I18.4 | -0.25 | 2.09E-01 | 0.25  | 2.03E-01 |
| RP11-649E7.7  | 0.03  | 8.69E-01 | 0.25  | 2.03E-01 |
| SCPEP1        | 0.03  | 8.73E-01 | 0.25  | 2.03E-01 |
| AMIGO2        | 0.04  | 8.29E-01 | -0.25 | 2.03E-01 |
| GRAP          | 0.32  | 1.01E-01 | -0.25 | 2.03E-01 |
| MTTP          | -0.19 | 3.39E-01 | -0.25 | 2.03E-01 |
| PSAPL1        | -0.26 | 1.90E-01 | -0.25 | 2.03E-01 |
| PTK2          | -0.17 | 3.95E-01 | -0.25 | 2.03E-01 |
| RP11-861E21.3 | -0.02 | 9.29E-01 | -0.25 | 2.03E-01 |
| UBIAD1        | -0.03 | 8.99E-01 | -0.25 | 2.03E-01 |
| ABCA5         | -0.01 | 9.65E-01 | -0.25 | 2.03E-01 |
| AC005702.1    | -0.14 | 4.67E-01 | -0.25 | 2.03E-01 |
| AC080037.1    | 0.25  | 1.99E-01 | 0.25  | 2.03E-01 |
| AC126614.1    | 0.12  | 5.28E-01 | 0.25  | 2.03E-01 |
| APOLD1        | -0.28 | 1.53E-01 | -0.25 | 2.03E-01 |
| C1D           | -0.12 | 5.50E-01 | -0.25 | 2.03E-01 |
| CECR5-AS1     | -0.04 | 8.23E-01 | -0.25 | 2.03E-01 |
| CPB2          | -0.03 | 8.74E-01 | -0.25 | 2.03E-01 |
| CTD-2006M22.2 | -0.39 | 3.86E-02 | -0.25 | 2.03E-01 |
| CYSTM1        | -0.09 | 6.36E-01 | -0.25 | 2.03E-01 |
| DRAM1         | -0.18 | 3.49E-01 | 0.25  | 2.03E-01 |
| EMX1          | -0.14 | 4.93E-01 | -0.25 | 2.03E-01 |



|                      |       |          |       |          |
|----------------------|-------|----------|-------|----------|
| <b>FAM86B1</b>       | -0.16 | 4.25E-01 | 0.25  | 2.03E-01 |
| <b>FOXP4</b>         | 0.05  | 8.07E-01 | 0.25  | 2.03E-01 |
| <b>FZD6</b>          | 0.38  | 4.56E-02 | 0.25  | 2.03E-01 |
| <b>GUCY1A3</b>       | -0.29 | 1.38E-01 | 0.25  | 2.03E-01 |
| <b>IL17D</b>         | 0.05  | 8.13E-01 | -0.25 | 2.03E-01 |
| <b>KCND2</b>         | -0.54 | 3.08E-03 | -0.25 | 2.03E-01 |
| <b>KIAA0141</b>      | 0.24  | 2.18E-01 | 0.25  | 2.03E-01 |
| <b>KLF4P1</b>        | -0.02 | 9.37E-01 | -0.25 | 2.03E-01 |
| <b>LINC00540</b>     | 0.16  | 4.29E-01 | 0.25  | 2.03E-01 |
| <b>MRPL16</b>        | 0.24  | 2.24E-01 | 0.25  | 2.03E-01 |
| <b>MTND4P32</b>      | 0.04  | 8.41E-01 | -0.25 | 2.03E-01 |
| <b>MTRF1L</b>        | -0.09 | 6.40E-01 | -0.25 | 2.03E-01 |
| <b>P2RY12</b>        | -0.04 | 8.27E-01 | 0.25  | 2.03E-01 |
| <b>PRSS37</b>        | -0.15 | 4.48E-01 | -0.25 | 2.03E-01 |
| <b>RNA5SP118</b>     | -0.24 | 2.20E-01 | -0.25 | 2.03E-01 |
| <b>RP11-373D23.2</b> | 0.01  | 9.56E-01 | -0.25 | 2.03E-01 |
| <b>RP11-404P21.9</b> | -0.15 | 4.41E-01 | 0.25  | 2.03E-01 |
| <b>RP11-411B10.2</b> | -0.28 | 1.47E-01 | -0.25 | 2.03E-01 |
| <b>RP11-90L20.2</b>  | -0.16 | 4.24E-01 | -0.25 | 2.03E-01 |
| <b>RP4-695O20.1</b>  | 0.35  | 6.59E-02 | -0.25 | 2.03E-01 |
| <b>RPL23AP17</b>     | -0.15 | 4.40E-01 | -0.25 | 2.03E-01 |
| <b>SLC36A3</b>       | -0.21 | 2.90E-01 | -0.25 | 2.03E-01 |
| <b>TGDS</b>          | -0.05 | 8.12E-01 | -0.25 | 2.03E-01 |
| <b>TRAF4</b>         | -0.01 | 9.50E-01 | 0.25  | 2.03E-01 |
| <b>TXN2</b>          | 0.14  | 4.89E-01 | 0.25  | 2.03E-01 |
| <b>XLOC_014105</b>   | -0.44 | 1.81E-02 | -0.25 | 2.03E-01 |
| <b>GET4</b>          | 0.09  | 6.53E-01 | 0.25  | 2.04E-01 |
| <b>IGFLR1</b>        | -0.03 | 8.61E-01 | 0.25  | 2.04E-01 |
| <b>PELI3</b>         | -0.02 | 9.38E-01 | 0.25  | 2.04E-01 |
| <b>PHKG1</b>         | 0.07  | 7.40E-01 | -0.25 | 2.04E-01 |
| <b>PMAIP1</b>        | 0.15  | 4.59E-01 | 0.25  | 2.04E-01 |
| <b>RBMS1</b>         | -0.11 | 5.60E-01 | -0.25 | 2.04E-01 |
| <b>RP11-154H23.4</b> | -0.33 | 9.04E-02 | -0.25 | 2.04E-01 |
| <b>RP11-198M15.1</b> | 0.00  | 9.99E-01 | -0.25 | 2.04E-01 |
| <b>RP11-353N14.7</b> | -0.11 | 5.79E-01 | -0.25 | 2.04E-01 |
| <b>RP5-872K7.7</b>   | -0.15 | 4.38E-01 | -0.25 | 2.04E-01 |
| <b>SHISA3</b>        | 0.00  | 9.99E-01 | 0.25  | 2.04E-01 |
| <b>SOCS3</b>         | 0.13  | 5.11E-01 | 0.25  | 2.04E-01 |
| <b>AC009299.3</b>    | 0.20  | 3.09E-01 | 0.25  | 2.04E-01 |
| <b>ANKRD18EP</b>     | 0.44  | 1.89E-02 | -0.25 | 2.04E-01 |
| <b>BAHCC1</b>        | -0.02 | 9.31E-01 | 0.25  | 2.04E-01 |
| <b>CETN3</b>         | 0.15  | 4.54E-01 | 0.25  | 2.04E-01 |
| <b>CSNK1G2</b>       | 0.28  | 1.48E-01 | 0.25  | 2.04E-01 |
| <b>GPLD1</b>         | 0.22  | 2.58E-01 | -0.25 | 2.04E-01 |
| <b>HIST1H2APS4</b>   | 0.02  | 9.31E-01 | -0.25 | 2.04E-01 |
| <b>IFI30</b>         | -0.07 | 7.16E-01 | 0.25  | 2.04E-01 |
| <b>LAP3P1</b>        | -0.15 | 4.54E-01 | 0.25  | 2.04E-01 |

|               |       |          |       |          |
|---------------|-------|----------|-------|----------|
| MB21D1        | 0.28  | 1.56E-01 | 0.25  | 2.04E-01 |
| NCR3          | -0.32 | 9.21E-02 | 0.25  | 2.04E-01 |
| NTAN1         | -0.18 | 3.72E-01 | 0.25  | 2.04E-01 |
| RAB1C         | 0.18  | 3.69E-01 | -0.25 | 2.04E-01 |
| RNA5SP372     | -0.06 | 7.73E-01 | 0.25  | 2.04E-01 |
| RP11-875O11.2 | -0.25 | 2.02E-01 | 0.25  | 2.04E-01 |
| RPP38         | 0.20  | 3.01E-01 | -0.25 | 2.04E-01 |
| RSBN1         | 0.08  | 6.86E-01 | -0.25 | 2.04E-01 |
| SVOPL         | 0.23  | 2.33E-01 | -0.25 | 2.04E-01 |
| ALDH16A1      | 0.20  | 3.04E-01 | 0.25  | 2.05E-01 |
| BNIP3L        | 0.09  | 6.43E-01 | 0.25  | 2.05E-01 |
| KCNE5         | -0.01 | 9.67E-01 | 0.25  | 2.05E-01 |
| RP11-1000B6.3 | -0.12 | 5.34E-01 | 0.25  | 2.05E-01 |
| RP11-267M23.3 | 0.17  | 3.79E-01 | 0.25  | 2.05E-01 |
| RP11-363E6.3  | 0.26  | 1.75E-01 | 0.25  | 2.05E-01 |
| SMIM20        | 0.09  | 6.40E-01 | 0.25  | 2.05E-01 |
| USP4          | -0.20 | 3.01E-01 | 0.25  | 2.05E-01 |
| CAPN6         | -0.09 | 6.64E-01 | -0.25 | 2.05E-01 |
| GPC6          | -0.25 | 2.09E-01 | -0.25 | 2.05E-01 |
| LINC00444     | -0.18 | 3.52E-01 | -0.25 | 2.05E-01 |
| OGFOD1P1      | -0.25 | 2.01E-01 | -0.25 | 2.05E-01 |
| BIK           | 0.19  | 3.34E-01 | 0.25  | 2.05E-01 |
| BLOC1S5       | 0.10  | 5.98E-01 | 0.25  | 2.05E-01 |
| CCDC61        | -0.22 | 2.71E-01 | 0.25  | 2.05E-01 |
| CTD-2382E5.6  | 0.04  | 8.29E-01 | 0.25  | 2.05E-01 |
| CUX2          | 0.01  | 9.59E-01 | -0.25 | 2.05E-01 |
| G30952        | -0.05 | 7.91E-01 | -0.25 | 2.05E-01 |
| GRIN3A        | 0.03  | 8.87E-01 | -0.25 | 2.05E-01 |
| HMGN2P35      | 0.06  | 7.63E-01 | 0.25  | 2.05E-01 |
| IGHV1-18      | 0.12  | 5.29E-01 | -0.25 | 2.05E-01 |
| LINC01197     | -0.10 | 6.23E-01 | 0.25  | 2.05E-01 |
| LRP2BP        | -0.39 | 4.29E-02 | -0.25 | 2.05E-01 |
| LY6E          | 0.17  | 3.82E-01 | 0.25  | 2.05E-01 |
| MIB2          | -0.05 | 7.97E-01 | 0.25  | 2.05E-01 |
| MORC2-AS1     | 0.22  | 2.51E-01 | -0.25 | 2.05E-01 |
| OSBPL2        | 0.04  | 8.40E-01 | 0.25  | 2.05E-01 |
| PES1P2        | 0.01  | 9.49E-01 | -0.25 | 2.05E-01 |
| PNPLA3        | -0.27 | 1.71E-01 | -0.25 | 2.05E-01 |
| PPP1R13L      | -0.16 | 4.25E-01 | 0.25  | 2.05E-01 |
| RFTN1P1       | 0.11  | 5.68E-01 | 0.25  | 2.05E-01 |
| RN7SL558P     | 0.05  | 7.82E-01 | 0.25  | 2.05E-01 |
| RP1-140J1.1   | 0.14  | 4.88E-01 | -0.25 | 2.05E-01 |
| RP11-1105G2.4 | 0.21  | 2.83E-01 | -0.25 | 2.05E-01 |
| RP4-753P9.3   | -0.36 | 6.11E-02 | -0.25 | 2.05E-01 |
| RPL23AP52     | 0.02  | 9.32E-01 | -0.25 | 2.05E-01 |
| SCRIB         | 0.29  | 1.30E-01 | 0.25  | 2.05E-01 |
| THEG          | -0.12 | 5.34E-01 | 0.25  | 2.05E-01 |

|                      |       |          |       |          |
|----------------------|-------|----------|-------|----------|
| <b>RP11-276H1.3</b>  | 0.30  | 1.25E-01 | -0.25 | 2.06E-01 |
| <b>SLC10A5</b>       | -0.16 | 4.04E-01 | -0.25 | 2.06E-01 |
| <b>TRMT11</b>        | 0.04  | 8.53E-01 | -0.25 | 2.06E-01 |
| <b>TULP4</b>         | -0.06 | 7.58E-01 | -0.25 | 2.06E-01 |
| <b>ZNF367</b>        | -0.03 | 8.70E-01 | -0.25 | 2.06E-01 |
| <b>ACER3</b>         | 0.19  | 3.29E-01 | 0.25  | 2.06E-01 |
| <b>CNN3</b>          | 0.28  | 1.43E-01 | 0.25  | 2.06E-01 |
| <b>G33806</b>        | -0.11 | 5.74E-01 | 0.25  | 2.06E-01 |
| <b>G6109</b>         | 0.18  | 3.62E-01 | 0.25  | 2.06E-01 |
| <b>PLTP</b>          | 0.15  | 4.46E-01 | 0.25  | 2.06E-01 |
| <b>RNU1-60P</b>      | 0.11  | 5.78E-01 | 0.25  | 2.06E-01 |
| <b>RP11-68I3.7</b>   | 0.05  | 8.18E-01 | 0.25  | 2.06E-01 |
| <b>CLMN</b>          | 0.05  | 8.01E-01 | -0.25 | 2.07E-01 |
| <b>CTB-33O18.3</b>   | -0.02 | 9.36E-01 | -0.25 | 2.07E-01 |
| <b>CTC-338M12.5</b>  | -0.33 | 8.67E-02 | -0.25 | 2.07E-01 |
| <b>DAPK2</b>         | -0.03 | 8.89E-01 | 0.25  | 2.07E-01 |
| <b>ENTHD1</b>        | -0.21 | 2.85E-01 | 0.25  | 2.07E-01 |
| <b>GADD45A</b>       | 0.27  | 1.64E-01 | 0.25  | 2.07E-01 |
| <b>GTPBP1</b>        | 0.36  | 5.84E-02 | 0.25  | 2.07E-01 |
| <b>KIAA0430</b>      | -0.21 | 2.80E-01 | 0.25  | 2.07E-01 |
| <b>LINC00693</b>     | 0.14  | 4.71E-01 | 0.25  | 2.07E-01 |
| <b>MALT1</b>         | 0.33  | 8.81E-02 | -0.25 | 2.07E-01 |
| <b>MBTPS2</b>        | 0.06  | 7.76E-01 | -0.25 | 2.07E-01 |
| <b>MGST1</b>         | 0.28  | 1.55E-01 | -0.25 | 2.07E-01 |
| <b>MRPL41</b>        | -0.07 | 7.21E-01 | 0.25  | 2.07E-01 |
| <b>NLRP10</b>        | -0.31 | 1.12E-01 | -0.25 | 2.07E-01 |
| <b>RP11-10J21.6</b>  | -0.29 | 1.32E-01 | -0.25 | 2.07E-01 |
| <b>RP11-260M2.1</b>  | -0.02 | 9.31E-01 | -0.25 | 2.07E-01 |
| <b>RP11-438L19.1</b> | -0.16 | 4.16E-01 | -0.25 | 2.07E-01 |
| <b>RP11-551L14.4</b> | -0.02 | 9.27E-01 | -0.25 | 2.07E-01 |
| <b>RP11-702H23.2</b> | 0.12  | 5.38E-01 | -0.25 | 2.07E-01 |
| <b>RP3-341D10.1</b>  | -0.31 | 1.05E-01 | -0.25 | 2.07E-01 |
| <b>SIGLEC8</b>       | 0.19  | 3.37E-01 | 0.25  | 2.07E-01 |
| <b>SNORD15B</b>      | 0.07  | 7.27E-01 | 0.25  | 2.07E-01 |
| <b>TEKT5</b>         | 0.06  | 7.60E-01 | -0.25 | 2.07E-01 |
| <b>TLE1P1</b>        | -0.34 | 7.77E-02 | -0.25 | 2.07E-01 |
| <b>ADORA1</b>        | 0.26  | 1.89E-01 | 0.25  | 2.07E-01 |
| <b>ANAPC10P1</b>     | 0.03  | 8.78E-01 | -0.25 | 2.07E-01 |
| <b>CIITA</b>         | 0.08  | 7.00E-01 | 0.25  | 2.07E-01 |
| <b>G3148</b>         | -0.07 | 7.28E-01 | -0.25 | 2.07E-01 |
| <b>GLUD1P2</b>       | -0.08 | 6.77E-01 | 0.25  | 2.07E-01 |
| <b>HMGN1P15</b>      | 0.15  | 4.35E-01 | -0.25 | 2.07E-01 |
| <b>MAP3K15</b>       | -0.12 | 5.28E-01 | -0.25 | 2.07E-01 |
| <b>MED17</b>         | 0.19  | 3.26E-01 | -0.25 | 2.07E-01 |
| <b>PEX13</b>         | 0.33  | 8.56E-02 | 0.25  | 2.07E-01 |
| <b>RALGPS1</b>       | -0.20 | 3.10E-01 | -0.25 | 2.07E-01 |
| <b>RNPC3</b>         | -0.12 | 5.40E-01 | -0.25 | 2.07E-01 |

|               |       |          |       |          |
|---------------|-------|----------|-------|----------|
| RPL6P12       | -0.31 | 1.03E-01 | -0.25 | 2.07E-01 |
| RPS20P35      | 0.20  | 3.12E-01 | 0.25  | 2.07E-01 |
| SNORD116-23   | 0.14  | 4.90E-01 | -0.25 | 2.07E-01 |
| TREM1         | -0.31 | 1.04E-01 | 0.25  | 2.07E-01 |
| YBX1P10       | 0.06  | 7.57E-01 | -0.25 | 2.07E-01 |
| ZNF446        | -0.27 | 1.59E-01 | -0.25 | 2.07E-01 |
| AC092580.4    | 0.18  | 3.49E-01 | 0.25  | 2.08E-01 |
| AC130689.5    | -0.12 | 5.54E-01 | -0.25 | 2.08E-01 |
| ANAPC4        | 0.27  | 1.73E-01 | -0.25 | 2.08E-01 |
| CCR9          | -0.33 | 8.75E-02 | -0.25 | 2.08E-01 |
| CPA6          | 0.19  | 3.23E-01 | 0.25  | 2.08E-01 |
| FOXN3         | 0.00  | 9.90E-01 | -0.25 | 2.08E-01 |
| G39807        | 0.33  | 8.67E-02 | 0.25  | 2.08E-01 |
| G9021         | -0.24 | 2.12E-01 | -0.25 | 2.08E-01 |
| GPHN          | -0.04 | 8.44E-01 | -0.25 | 2.08E-01 |
| MIR3146       | -0.21 | 2.86E-01 | 0.25  | 2.08E-01 |
| MIR573        | 0.22  | 2.67E-01 | -0.25 | 2.08E-01 |
| PCYOX1        | 0.04  | 8.31E-01 | 0.25  | 2.08E-01 |
| RAPGEF5       | 0.22  | 2.59E-01 | 0.25  | 2.08E-01 |
| RBM48         | -0.06 | 7.78E-01 | -0.25 | 2.08E-01 |
| RP11-384L8.1  | 0.21  | 2.84E-01 | 0.25  | 2.08E-01 |
| THEM6         | 0.24  | 2.22E-01 | 0.25  | 2.08E-01 |
| TMEM214       | 0.13  | 5.07E-01 | 0.25  | 2.08E-01 |
| ZMYM1         | 0.26  | 1.81E-01 | 0.25  | 2.08E-01 |
| AKR1E2        | -0.35 | 6.87E-02 | 0.25  | 2.08E-01 |
| CCT8P1        | 0.02  | 9.32E-01 | -0.25 | 2.08E-01 |
| CYP2C8        | -0.17 | 3.86E-01 | -0.25 | 2.08E-01 |
| DHX34         | 0.20  | 2.99E-01 | 0.25  | 2.08E-01 |
| GCC2          | 0.09  | 6.53E-01 | -0.25 | 2.08E-01 |
| KLHL42        | 0.18  | 3.55E-01 | -0.25 | 2.08E-01 |
| PAX9          | 0.16  | 4.07E-01 | 0.25  | 2.08E-01 |
| RNA5SP288     | -0.01 | 9.70E-01 | -0.25 | 2.08E-01 |
| RNU1-1        | 0.15  | 4.44E-01 | 0.25  | 2.08E-01 |
| RP11-113A11.3 | -0.34 | 7.79E-02 | -0.25 | 2.08E-01 |
| RP11-356M20.3 | -0.06 | 7.54E-01 | 0.25  | 2.08E-01 |
| RP11-393I2.4  | -0.09 | 6.59E-01 | -0.25 | 2.08E-01 |
| RP11-831H9.3  | -0.31 | 1.12E-01 | -0.25 | 2.08E-01 |
| RP13-415G19.2 | 0.16  | 4.09E-01 | 0.25  | 2.08E-01 |
| RPTN          | 0.02  | 9.33E-01 | 0.25  | 2.08E-01 |
| SLC22A20      | -0.08 | 7.03E-01 | -0.25 | 2.08E-01 |
| TP53AIP1      | 0.18  | 3.46E-01 | 0.25  | 2.08E-01 |
| AC022173.2    | 0.01  | 9.65E-01 | -0.25 | 2.09E-01 |
| FAM227B       | -0.12 | 5.34E-01 | -0.25 | 2.09E-01 |
| G35278        | 0.06  | 7.66E-01 | -0.25 | 2.09E-01 |
| GNRH2         | -0.30 | 1.16E-01 | -0.25 | 2.09E-01 |
| ITGAL         | 0.40  | 3.62E-02 | 0.25  | 2.09E-01 |
| KLF4          | -0.21 | 2.92E-01 | -0.25 | 2.09E-01 |

|               |       |          |       |          |
|---------------|-------|----------|-------|----------|
| MBLAC2        | 0.16  | 4.13E-01 | -0.25 | 2.09E-01 |
| RAPGEFL1      | -0.03 | 8.68E-01 | -0.25 | 2.09E-01 |
| RNF148        | -0.06 | 7.57E-01 | 0.25  | 2.09E-01 |
| RP3-523K23.2  | 0.13  | 5.09E-01 | 0.25  | 2.09E-01 |
| RP5-1125A11.7 | -0.05 | 7.99E-01 | 0.25  | 2.09E-01 |
| YIPF2         | 0.11  | 5.79E-01 | 0.25  | 2.09E-01 |
| ZNF205        | -0.01 | 9.66E-01 | 0.25  | 2.09E-01 |
| ATP8A2P2      | -0.08 | 6.76E-01 | -0.25 | 2.09E-01 |
| CD2AP         | 0.01  | 9.46E-01 | -0.25 | 2.09E-01 |
| CFAP161       | -0.11 | 5.78E-01 | -0.25 | 2.09E-01 |
| CNGA4         | -0.20 | 3.04E-01 | -0.25 | 2.09E-01 |
| CTD-2623N2.11 | -0.37 | 5.60E-02 | -0.25 | 2.09E-01 |
| FAM208B       | 0.05  | 7.91E-01 | -0.25 | 2.09E-01 |
| FANCE         | 0.03  | 8.69E-01 | 0.25  | 2.09E-01 |
| GDAP2         | 0.18  | 3.50E-01 | -0.25 | 2.09E-01 |
| LA16c-380H5.3 | -0.46 | 1.39E-02 | -0.25 | 2.09E-01 |
| LHX2          | -0.11 | 5.78E-01 | -0.25 | 2.09E-01 |
| MIOS          | 0.00  | 9.80E-01 | -0.25 | 2.09E-01 |
| MIR550A1      | -0.04 | 8.32E-01 | 0.25  | 2.09E-01 |
| RNF135        | 0.06  | 7.81E-01 | 0.25  | 2.09E-01 |
| RP11-343K8.3  | -0.05 | 7.92E-01 | 0.25  | 2.09E-01 |
| RP11-359P5.1  | 0.32  | 9.90E-02 | -0.25 | 2.09E-01 |
| RP11-83J16.1  | -0.10 | 6.10E-01 | -0.25 | 2.09E-01 |
| RP4-593H12.1  | -0.34 | 7.79E-02 | 0.25  | 2.09E-01 |
| RP5-1074L1.4  | -0.22 | 2.56E-01 | -0.25 | 2.09E-01 |
| SNORA45       | 0.22  | 2.69E-01 | 0.25  | 2.09E-01 |
| SNORD3A       | 0.20  | 3.12E-01 | 0.25  | 2.09E-01 |
| SORBS2        | -0.19 | 3.43E-01 | -0.25 | 2.09E-01 |
| SPTLC2        | 0.28  | 1.46E-01 | 0.25  | 2.09E-01 |
| CCDC141       | -0.22 | 2.67E-01 | 0.25  | 2.10E-01 |
| INAFM1        | 0.05  | 8.01E-01 | 0.25  | 2.10E-01 |
| SDCBP2        | 0.34  | 7.89E-02 | 0.25  | 2.10E-01 |
| TIE1          | -0.03 | 8.85E-01 | 0.25  | 2.10E-01 |
| ZNF788        | 0.16  | 4.14E-01 | 0.25  | 2.10E-01 |
| CXorf38       | 0.25  | 2.00E-01 | -0.25 | 2.10E-01 |
| FAM8A1        | 0.04  | 8.45E-01 | -0.25 | 2.10E-01 |
| GPR151        | -0.22 | 2.60E-01 | -0.25 | 2.10E-01 |
| NECAP1P2      | -0.06 | 7.60E-01 | -0.25 | 2.10E-01 |
| PDHA1P1       | 0.06  | 7.80E-01 | -0.25 | 2.10E-01 |
| RP11-57H14.4  | -0.08 | 6.74E-01 | -0.25 | 2.10E-01 |
| RP4-593M8.1   | -0.30 | 1.24E-01 | -0.25 | 2.10E-01 |
| APBA1         | -0.21 | 2.90E-01 | -0.25 | 2.11E-01 |
| ASIC2         | -0.08 | 7.00E-01 | -0.25 | 2.11E-01 |
| CD7           | 0.04  | 8.40E-01 | 0.25  | 2.11E-01 |
| CTD-3064M3.4  | 0.10  | 6.01E-01 | 0.25  | 2.11E-01 |
| CTD-3199J23.6 | -0.42 | 2.74E-02 | 0.25  | 2.11E-01 |
| GMPR2         | 0.17  | 3.77E-01 | 0.25  | 2.11E-01 |

|               |       |          |       |          |
|---------------|-------|----------|-------|----------|
| HS3ST3A1      | 0.09  | 6.61E-01 | 0.25  | 2.11E-01 |
| ITCH          | 0.01  | 9.65E-01 | -0.25 | 2.11E-01 |
| KCNC3         | -0.03 | 8.74E-01 | -0.25 | 2.11E-01 |
| LCE5A         | 0.00  | 9.86E-01 | -0.25 | 2.11E-01 |
| LOXL4         | -0.05 | 7.92E-01 | -0.25 | 2.11E-01 |
| MUC20P1       | 0.08  | 6.88E-01 | -0.25 | 2.11E-01 |
| RP11-356J5.12 | -0.19 | 3.28E-01 | -0.25 | 2.11E-01 |
| RP11-615I2.6  | 0.13  | 5.01E-01 | 0.25  | 2.11E-01 |
| SSH1          | 0.09  | 6.43E-01 | 0.25  | 2.11E-01 |
| ANKRD10-IT1   | -0.15 | 4.40E-01 | -0.25 | 2.11E-01 |
| CTD-2339M3.1  | -0.01 | 9.69E-01 | -0.25 | 2.11E-01 |
| DPM1          | 0.08  | 6.89E-01 | -0.25 | 2.11E-01 |
| HPCAL4        | -0.05 | 8.00E-01 | -0.25 | 2.11E-01 |
| KCNQ1OT1      | -0.37 | 5.38E-02 | -0.25 | 2.11E-01 |
| KIAA0196-AS1  | -0.19 | 3.26E-01 | -0.25 | 2.11E-01 |
| PHLPP2        | -0.10 | 6.22E-01 | -0.25 | 2.11E-01 |
| PIF1          | -0.08 | 6.88E-01 | 0.25  | 2.11E-01 |
| RGS14         | 0.16  | 4.16E-01 | -0.25 | 2.11E-01 |
| RP11-33B1.1   | 0.15  | 4.39E-01 | -0.25 | 2.11E-01 |
| RP11-571F15.2 | 0.21  | 2.83E-01 | 0.25  | 2.11E-01 |
| RP11-85B7.5   | -0.20 | 3.13E-01 | 0.25  | 2.11E-01 |
| SRSF4         | -0.17 | 3.82E-01 | -0.25 | 2.11E-01 |
| TNS1          | -0.03 | 8.97E-01 | 0.25  | 2.11E-01 |
| TRABD2B       | -0.08 | 6.73E-01 | 0.25  | 2.11E-01 |
| CHMP4C        | 0.08  | 6.68E-01 | 0.25  | 2.12E-01 |
| KIAA1614      | -0.45 | 1.50E-02 | 0.25  | 2.12E-01 |
| KLK11         | -0.09 | 6.50E-01 | -0.25 | 2.12E-01 |
| PRDM6         | 0.04  | 8.30E-01 | -0.25 | 2.12E-01 |
| PRR29         | -0.26 | 1.84E-01 | 0.25  | 2.12E-01 |
| RNF219-AS1    | -0.40 | 3.69E-02 | -0.25 | 2.12E-01 |
| RP1-102K2.8   | -0.22 | 2.66E-01 | -0.25 | 2.12E-01 |
| RP11-36B15.1  | -0.19 | 3.28E-01 | -0.25 | 2.12E-01 |
| RP11-531F16.4 | -0.03 | 8.81E-01 | -0.25 | 2.12E-01 |
| RP11-545A16.3 | -0.19 | 3.31E-01 | -0.25 | 2.12E-01 |
| RP11-555K12.1 | 0.13  | 5.19E-01 | -0.25 | 2.12E-01 |
| SNX18P9       | -0.60 | 6.85E-04 | -0.25 | 2.12E-01 |
| AC079922.3    | 0.28  | 1.50E-01 | 0.25  | 2.12E-01 |
| APOOL         | 0.14  | 4.74E-01 | -0.25 | 2.12E-01 |
| CABP1         | -0.48 | 9.70E-03 | 0.25  | 2.12E-01 |
| KXD1          | 0.16  | 4.19E-01 | 0.25  | 2.12E-01 |
| MIR4774       | -0.01 | 9.74E-01 | -0.25 | 2.12E-01 |
| NDUFA5        | 0.10  | 6.26E-01 | -0.25 | 2.12E-01 |
| RP11-11N7.5   | -0.25 | 1.93E-01 | -0.25 | 2.12E-01 |
| RP11-142E9.1  | 0.01  | 9.67E-01 | -0.25 | 2.12E-01 |
| RP11-219E7.3  | 0.04  | 8.51E-01 | -0.25 | 2.12E-01 |
| RP11-304L19.1 | -0.10 | 5.96E-01 | -0.25 | 2.12E-01 |
| RP11-505P4.6  | 0.21  | 2.91E-01 | -0.25 | 2.12E-01 |

|               |       |          |       |          |
|---------------|-------|----------|-------|----------|
| RP4-728D4.2   | -0.48 | 8.97E-03 | -0.25 | 2.12E-01 |
| RP6-24A23.3   | -0.20 | 3.20E-01 | -0.25 | 2.12E-01 |
| USP22         | 0.34  | 7.87E-02 | 0.25  | 2.12E-01 |
| XLOC_003808   | -0.20 | 3.15E-01 | -0.25 | 2.12E-01 |
| XLOC_009868   | 0.00  | 9.94E-01 | 0.25  | 2.12E-01 |
| AGPAT4        | 0.16  | 4.18E-01 | -0.25 | 2.13E-01 |
| ARSI          | -0.20 | 2.96E-01 | -0.25 | 2.13E-01 |
| CDCP1         | 0.26  | 1.84E-01 | 0.25  | 2.13E-01 |
| ELMSAN1       | -0.17 | 3.84E-01 | -0.25 | 2.13E-01 |
| RP11-798K23.5 | 0.35  | 6.64E-02 | -0.25 | 2.13E-01 |
| SLC39A11      | 0.20  | 3.09E-01 | 0.25  | 2.13E-01 |
| TATDN1        | -0.02 | 9.04E-01 | -0.25 | 2.13E-01 |
| XLOC_009493   | -0.28 | 1.45E-01 | -0.25 | 2.13E-01 |
| ZNF740        | 0.08  | 6.93E-01 | 0.25  | 2.13E-01 |
| AP000577.2    | -0.33 | 8.70E-02 | -0.25 | 2.13E-01 |
| BRD9P2        | 0.00  | 9.90E-01 | -0.25 | 2.13E-01 |
| C6orf10       | -0.32 | 1.01E-01 | 0.25  | 2.13E-01 |
| CDHR2         | -0.20 | 3.09E-01 | -0.25 | 2.13E-01 |
| EGR3          | -0.17 | 3.75E-01 | -0.25 | 2.13E-01 |
| MIR4459       | -0.30 | 1.24E-01 | 0.25  | 2.13E-01 |
| MYD88         | 0.30  | 1.23E-01 | 0.25  | 2.13E-01 |
| NAGA          | 0.17  | 3.88E-01 | 0.25  | 2.13E-01 |
| RP11-446F17.3 | -0.07 | 7.05E-01 | -0.25 | 2.13E-01 |
| RP3-339A18.6  | -0.18 | 3.52E-01 | 0.25  | 2.13E-01 |
| TMEM127       | 0.10  | 6.10E-01 | 0.25  | 2.13E-01 |
| ZNF252P-AS1   | 0.00  | 9.90E-01 | -0.25 | 2.13E-01 |
| AL928654.7    | -0.20 | 3.14E-01 | -0.25 | 2.14E-01 |
| ARFGF3        | -0.23 | 2.49E-01 | -0.25 | 2.14E-01 |
| FCF1P2        | -0.09 | 6.61E-01 | -0.25 | 2.14E-01 |
| GPR63         | -0.11 | 5.89E-01 | -0.25 | 2.14E-01 |
| LRR63         | -0.23 | 2.44E-01 | 0.25  | 2.14E-01 |
| RHBDF2        | 0.23  | 2.31E-01 | 0.25  | 2.14E-01 |
| RNA5SP78      | -0.33 | 8.73E-02 | 0.25  | 2.14E-01 |
| RP11-159F24.5 | -0.34 | 7.39E-02 | 0.25  | 2.14E-01 |
| RP11-48O20.5  | -0.03 | 8.80E-01 | 0.25  | 2.14E-01 |
| RP11-56B16.5  | -0.06 | 7.61E-01 | -0.25 | 2.14E-01 |
| RP13-401N8.1  | -0.10 | 6.22E-01 | -0.25 | 2.14E-01 |
| SEMG2         | 0.24  | 2.22E-01 | 0.25  | 2.14E-01 |
| SORBS1        | -0.17 | 3.86E-01 | -0.25 | 2.14E-01 |
| YTHDC1        | -0.03 | 8.78E-01 | 0.25  | 2.14E-01 |
| CCDC71        | 0.12  | 5.56E-01 | 0.25  | 2.15E-01 |
| CSNK2A3       | -0.12 | 5.41E-01 | 0.25  | 2.15E-01 |
| DFNA5         | 0.21  | 2.91E-01 | 0.25  | 2.15E-01 |
| ERRFI1        | -0.12 | 5.59E-01 | 0.25  | 2.15E-01 |
| MYH13         | 0.04  | 8.26E-01 | 0.25  | 2.15E-01 |
| NFKB1         | 0.40  | 3.36E-02 | 0.25  | 2.15E-01 |
| PRAF2         | 0.01  | 9.75E-01 | 0.25  | 2.15E-01 |

|                      |       |          |       |          |
|----------------------|-------|----------|-------|----------|
| <b>RIMS3</b>         | 0.13  | 5.21E-01 | 0.25  | 2.15E-01 |
| <b>RNU12</b>         | 0.14  | 4.70E-01 | 0.25  | 2.15E-01 |
| <b>RP11-159N11.3</b> | 0.44  | 2.05E-02 | 0.25  | 2.15E-01 |
| <b>RP11-756A22.7</b> | 0.09  | 6.51E-01 | 0.25  | 2.15E-01 |
| <b>TRIM71</b>        | -0.29 | 1.33E-01 | 0.25  | 2.15E-01 |
| <b>AC017048.2</b>    | -0.03 | 8.73E-01 | -0.25 | 2.15E-01 |
| <b>CBX5P1</b>        | -0.41 | 2.95E-02 | -0.25 | 2.15E-01 |
| <b>CTD-2049O4.1</b>  | 0.11  | 5.86E-01 | -0.25 | 2.15E-01 |
| <b>FAM126B</b>       | 0.21  | 2.93E-01 | -0.25 | 2.15E-01 |
| <b>GDAP1L1</b>       | -0.04 | 8.41E-01 | -0.25 | 2.15E-01 |
| <b>LPP</b>           | -0.04 | 8.35E-01 | -0.25 | 2.15E-01 |
| <b>MORF4L2P1</b>     | -0.09 | 6.43E-01 | -0.25 | 2.15E-01 |
| <b>NXPE1</b>         | 0.22  | 2.56E-01 | -0.25 | 2.15E-01 |
| <b>PA2G4P4</b>       | 0.00  | 9.83E-01 | -0.25 | 2.15E-01 |
| <b>RP11-294J22.7</b> | -0.12 | 5.29E-01 | -0.25 | 2.15E-01 |
| <b>RP11-310E22.5</b> | -0.41 | 3.02E-02 | -0.25 | 2.15E-01 |
| <b>SCARNA15</b>      | 0.24  | 2.13E-01 | -0.25 | 2.15E-01 |
| <b>TTC23L</b>        | -0.20 | 3.14E-01 | -0.25 | 2.15E-01 |
| <b>TYR</b>           | -0.28 | 1.48E-01 | -0.25 | 2.15E-01 |
| <b>ZBTB20-AS4</b>    | 0.10  | 6.19E-01 | -0.25 | 2.15E-01 |
| <b>AC009120.6</b>    | -0.08 | 7.01E-01 | -0.25 | 2.15E-01 |
| <b>ADGRF1</b>        | 0.10  | 5.97E-01 | 0.25  | 2.15E-01 |
| <b>BRINP2</b>        | -0.30 | 1.15E-01 | -0.25 | 2.15E-01 |
| <b>CEP44</b>         | -0.09 | 6.62E-01 | -0.25 | 2.15E-01 |
| <b>CTB-129P6.11</b>  | 0.04  | 8.27E-01 | -0.25 | 2.15E-01 |
| <b>CTD-3064H18.4</b> | -0.07 | 7.33E-01 | -0.25 | 2.15E-01 |
| <b>DNM3</b>          | 0.04  | 8.48E-01 | -0.25 | 2.15E-01 |
| <b>EIF3E</b>         | 0.02  | 9.27E-01 | -0.25 | 2.15E-01 |
| <b>ESRRAP2</b>       | -0.04 | 8.23E-01 | -0.25 | 2.15E-01 |
| <b>G37636</b>        | 0.11  | 5.62E-01 | 0.25  | 2.15E-01 |
| <b>HMGB1P31</b>      | -0.08 | 6.74E-01 | 0.25  | 2.15E-01 |
| <b>LILRB3</b>        | 0.03  | 8.89E-01 | 0.25  | 2.15E-01 |
| <b>5-Mar</b>         | 0.42  | 2.77E-02 | 0.25  | 2.15E-01 |
| <b>NAV2</b>          | 0.10  | 6.21E-01 | 0.25  | 2.15E-01 |
| <b>RNU6-10P</b>      | -0.09 | 6.48E-01 | 0.25  | 2.15E-01 |
| <b>RP11-161M6.2</b>  | -0.43 | 2.21E-02 | -0.25 | 2.15E-01 |
| <b>RP11-1H15.2</b>   | -0.46 | 1.32E-02 | -0.25 | 2.15E-01 |
| <b>RP11-667K14.3</b> | 0.21  | 2.83E-01 | 0.25  | 2.15E-01 |
| <b>SLC11A2</b>       | 0.25  | 1.97E-01 | -0.25 | 2.15E-01 |
| <b>SNX18P15</b>      | -0.10 | 6.15E-01 | -0.25 | 2.15E-01 |
| <b>UBAP2</b>         | -0.08 | 6.92E-01 | 0.25  | 2.15E-01 |
| <b>BORCS8</b>        | -0.09 | 6.60E-01 | 0.25  | 2.16E-01 |
| <b>IKZF1</b>         | 0.26  | 1.77E-01 | 0.25  | 2.16E-01 |
| <b>RHOT2</b>         | 0.27  | 1.57E-01 | 0.25  | 2.16E-01 |
| <b>RP13-582O9.7</b>  | -0.08 | 7.03E-01 | 0.25  | 2.16E-01 |
| <b>SYT11</b>         | -0.29 | 1.39E-01 | 0.25  | 2.16E-01 |
| <b>TRIM11</b>        | -0.03 | 8.71E-01 | 0.25  | 2.16E-01 |



|                      |       |          |       |          |
|----------------------|-------|----------|-------|----------|
| <b>TXNRD2</b>        | -0.07 | 7.20E-01 | 0.25  | 2.16E-01 |
| <b>AC007377.1</b>    | -0.39 | 4.07E-02 | -0.25 | 2.16E-01 |
| <b>AC037445.1</b>    | 0.14  | 4.74E-01 | -0.25 | 2.16E-01 |
| <b>CORO1C</b>        | -0.16 | 4.07E-01 | -0.25 | 2.16E-01 |
| <b>G12754</b>        | -0.01 | 9.54E-01 | -0.25 | 2.16E-01 |
| <b>RNF130</b>        | 0.07  | 7.31E-01 | -0.25 | 2.16E-01 |
| <b>AC007879.2</b>    | -0.02 | 9.04E-01 | -0.25 | 2.16E-01 |
| <b>AC093642.5</b>    | -0.36 | 6.07E-02 | -0.25 | 2.16E-01 |
| <b>CACNA2D2</b>      | -0.17 | 3.91E-01 | -0.25 | 2.16E-01 |
| <b>CCDC97</b>        | 0.38  | 4.78E-02 | 0.25  | 2.16E-01 |
| <b>CNTF</b>          | -0.06 | 7.58E-01 | -0.25 | 2.16E-01 |
| <b>CYP2C18</b>       | -0.02 | 9.28E-01 | -0.25 | 2.16E-01 |
| <b>G15374</b>        | 0.02  | 9.00E-01 | -0.25 | 2.16E-01 |
| <b>GDPD3</b>         | 0.22  | 2.68E-01 | 0.25  | 2.16E-01 |
| <b>GPR155</b>        | 0.01  | 9.45E-01 | -0.25 | 2.16E-01 |
| <b>IDH2</b>          | -0.06 | 7.67E-01 | 0.25  | 2.16E-01 |
| <b>NAA60</b>         | -0.17 | 3.87E-01 | 0.25  | 2.16E-01 |
| <b>RHCG</b>          | 0.35  | 6.50E-02 | 0.25  | 2.16E-01 |
| <b>RP11-252I14.1</b> | -0.22 | 2.65E-01 | -0.25 | 2.16E-01 |
| <b>RP11-36C20.1</b>  | 0.03  | 8.69E-01 | -0.25 | 2.16E-01 |
| <b>RP11-391L3.4</b>  | 0.08  | 6.84E-01 | -0.25 | 2.16E-01 |
| <b>RP11-547D23.1</b> | -0.25 | 2.08E-01 | -0.25 | 2.16E-01 |
| <b>RP11-627G18.2</b> | -0.13 | 4.97E-01 | -0.25 | 2.16E-01 |
| <b>RP11-972P1.7</b>  | -0.01 | 9.74E-01 | -0.25 | 2.16E-01 |
| <b>SLC31A1</b>       | 0.25  | 1.99E-01 | 0.25  | 2.16E-01 |
| <b>ARHGEF1</b>       | 0.18  | 3.61E-01 | 0.25  | 2.17E-01 |
| <b>ARRB2</b>         | 0.15  | 4.51E-01 | 0.25  | 2.17E-01 |
| <b>DHRS4</b>         | -0.30 | 1.27E-01 | 0.25  | 2.17E-01 |
| <b>RN7SL30P</b>      | -0.08 | 6.69E-01 | 0.25  | 2.17E-01 |
| <b>RP11-533O20.2</b> | 0.24  | 2.23E-01 | 0.25  | 2.17E-01 |
| <b>RP11-750H9.5</b>  | -0.02 | 9.26E-01 | 0.25  | 2.17E-01 |
| <b>SYTL5</b>         | 0.12  | 5.48E-01 | 0.25  | 2.17E-01 |
| <b>TTL</b>           | 0.10  | 6.04E-01 | 0.25  | 2.17E-01 |
| <b>ANKRD49</b>       | -0.23 | 2.48E-01 | -0.25 | 2.17E-01 |
| <b>ERMP1</b>         | -0.05 | 7.91E-01 | -0.25 | 2.17E-01 |
| <b>FAM98B</b>        | -0.04 | 8.45E-01 | -0.25 | 2.17E-01 |
| <b>HYKK</b>          | 0.00  | 1.00E+00 | -0.25 | 2.17E-01 |
| <b>IARS2</b>         | 0.00  | 9.91E-01 | -0.25 | 2.17E-01 |
| <b>LINC00330</b>     | 0.04  | 8.55E-01 | -0.25 | 2.17E-01 |
| <b>MIR553</b>        | -0.05 | 8.07E-01 | -0.25 | 2.17E-01 |
| <b>PNMAL1</b>        | -0.36 | 5.86E-02 | -0.25 | 2.17E-01 |
| <b>PRR13P3</b>       | 0.03  | 8.68E-01 | -0.25 | 2.17E-01 |
| <b>RP1-265C24.8</b>  | -0.22 | 2.56E-01 | -0.25 | 2.17E-01 |
| <b>RP11-423O2.5</b>  | 0.05  | 7.83E-01 | -0.25 | 2.17E-01 |
| <b>RP11-515O17.2</b> | 0.03  | 8.87E-01 | -0.25 | 2.17E-01 |
| <b>RPGRIP1L</b>      | 0.06  | 7.46E-01 | -0.25 | 2.17E-01 |
| <b>ZNF350</b>        | -0.31 | 1.13E-01 | -0.25 | 2.17E-01 |

|               |       |          |       |          |
|---------------|-------|----------|-------|----------|
| ACTN2         | 0.02  | 9.04E-01 | 0.25  | 2.18E-01 |
| AHDC1         | -0.25 | 1.92E-01 | -0.25 | 2.18E-01 |
| CHAMP1        | 0.03  | 8.80E-01 | 0.25  | 2.18E-01 |
| G42447        | -0.04 | 8.43E-01 | -0.25 | 2.18E-01 |
| MYO7B         | 0.23  | 2.48E-01 | -0.25 | 2.18E-01 |
| NUCB2         | -0.04 | 8.36E-01 | -0.25 | 2.18E-01 |
| PRKX-AS1      | 0.14  | 4.82E-01 | 0.25  | 2.18E-01 |
| RABAC1        | 0.21  | 2.91E-01 | 0.25  | 2.18E-01 |
| RN7SL846P     | 0.00  | 9.91E-01 | -0.25 | 2.18E-01 |
| RP11-152N13.5 | -0.07 | 7.26E-01 | 0.25  | 2.18E-01 |
| RP11-212P7.2  | 0.04  | 8.55E-01 | 0.25  | 2.18E-01 |
| RP11-322E11.5 | 0.18  | 3.66E-01 | 0.25  | 2.18E-01 |
| RPL23AP14     | -0.12 | 5.34E-01 | -0.25 | 2.18E-01 |
| TBL1XR1       | 0.23  | 2.48E-01 | 0.25  | 2.18E-01 |
| TCEANC        | 0.21  | 2.79E-01 | -0.25 | 2.18E-01 |
| WNK2          | -0.16 | 4.21E-01 | -0.25 | 2.18E-01 |
| AL603965.1    | -0.30 | 1.16E-01 | 0.24  | 2.18E-01 |
| AP001055.1    | -0.14 | 4.66E-01 | 0.24  | 2.18E-01 |
| CD93          | 0.08  | 7.00E-01 | 0.24  | 2.18E-01 |
| CEP85L        | -0.38 | 4.52E-02 | -0.24 | 2.18E-01 |
| CHCHD10       | 0.30  | 1.27E-01 | 0.24  | 2.18E-01 |
| CYTH1         | 0.15  | 4.47E-01 | 0.24  | 2.18E-01 |
| HELLS         | -0.01 | 9.66E-01 | -0.24 | 2.18E-01 |
| NAPRT         | 0.26  | 1.87E-01 | 0.24  | 2.18E-01 |
| PRPH2         | -0.16 | 4.24E-01 | -0.24 | 2.18E-01 |
| RAB11B        | -0.22 | 2.68E-01 | 0.24  | 2.18E-01 |
| RNF223        | 0.13  | 5.06E-01 | 0.24  | 2.18E-01 |
| RNU6-862P     | 0.18  | 3.63E-01 | 0.24  | 2.18E-01 |
| RP11-20B24.5  | -0.03 | 8.78E-01 | -0.24 | 2.18E-01 |
| RP11-215C7.3  | -0.19 | 3.30E-01 | -0.24 | 2.18E-01 |
| RP11-382J24.2 | -0.05 | 7.88E-01 | 0.24  | 2.18E-01 |
| RP11-588D3.1  | 0.08  | 6.88E-01 | 0.24  | 2.18E-01 |
| RP11-649A18.3 | 0.07  | 7.24E-01 | -0.24 | 2.18E-01 |
| RP11-706O15.1 | -0.33 | 8.87E-02 | -0.24 | 2.18E-01 |
| SNORA12       | -0.03 | 8.88E-01 | 0.24  | 2.18E-01 |
| STEAP4        | 0.27  | 1.63E-01 | 0.24  | 2.18E-01 |
| TRAV8-4       | 0.00  | 9.96E-01 | 0.24  | 2.18E-01 |
| ZDHHC7        | 0.25  | 1.91E-01 | 0.24  | 2.18E-01 |
| AC007919.18   | 0.40  | 3.62E-02 | 0.24  | 2.19E-01 |
| ADGRG4        | -0.04 | 8.45E-01 | -0.24 | 2.19E-01 |
| CAPN13        | -0.05 | 7.95E-01 | -0.24 | 2.19E-01 |
| CCL24         | 0.12  | 5.29E-01 | 0.24  | 2.19E-01 |
| CTC-444N24.11 | 0.22  | 2.71E-01 | -0.24 | 2.19E-01 |
| CTD-3105H18.7 | -0.15 | 4.48E-01 | 0.24  | 2.19E-01 |
| FAM102A       | 0.23  | 2.37E-01 | 0.24  | 2.19E-01 |
| FRRS1L        | -0.21 | 2.78E-01 | -0.24 | 2.19E-01 |
| JAZF1         | -0.33 | 8.53E-02 | -0.24 | 2.19E-01 |

|                |       |          |       |          |
|----------------|-------|----------|-------|----------|
| LINC01355      | -0.33 | 8.45E-02 | -0.24 | 2.19E-01 |
| LMOD3          | -0.18 | 3.56E-01 | -0.24 | 2.19E-01 |
| MCOLN3         | -0.42 | 2.43E-02 | -0.24 | 2.19E-01 |
| PPIG           | -0.02 | 9.05E-01 | -0.24 | 2.19E-01 |
| RN7SL285P      | 0.15  | 4.37E-01 | 0.24  | 2.19E-01 |
| RP11-136C24.3  | -0.01 | 9.59E-01 | -0.24 | 2.19E-01 |
| RP11-313J2.1   | 0.07  | 7.12E-01 | 0.24  | 2.19E-01 |
| RP11-38L15.2   | -0.09 | 6.37E-01 | 0.24  | 2.19E-01 |
| RP11-53O19.3   | -0.12 | 5.42E-01 | -0.24 | 2.19E-01 |
| SCD            | 0.16  | 4.29E-01 | 0.24  | 2.19E-01 |
| SHISA5         | 0.15  | 4.54E-01 | 0.24  | 2.19E-01 |
| SNHG8          | -0.18 | 3.55E-01 | 0.24  | 2.19E-01 |
| TMEM94         | -0.22 | 2.62E-01 | 0.24  | 2.19E-01 |
| AC092038.1     | -0.02 | 9.16E-01 | -0.24 | 2.19E-01 |
| ANKRD23        | -0.06 | 7.64E-01 | -0.24 | 2.19E-01 |
| ARMC7          | -0.12 | 5.57E-01 | 0.24  | 2.19E-01 |
| HNRNPA1P5      | 0.06  | 7.61E-01 | 0.24  | 2.19E-01 |
| HNRNPDL        | 0.12  | 5.42E-01 | -0.24 | 2.19E-01 |
| ITSN2          | 0.21  | 2.80E-01 | 0.24  | 2.19E-01 |
| JUNB           | 0.18  | 3.46E-01 | 0.24  | 2.19E-01 |
| KRT15          | 0.02  | 9.39E-01 | -0.24 | 2.19E-01 |
| MECOM          | 0.21  | 2.79E-01 | 0.24  | 2.19E-01 |
| PALM           | -0.23 | 2.37E-01 | -0.24 | 2.19E-01 |
| PLD3           | 0.03  | 8.67E-01 | 0.24  | 2.19E-01 |
| PTGDR          | -0.19 | 3.31E-01 | -0.24 | 2.19E-01 |
| RFX7           | -0.13 | 5.18E-01 | 0.24  | 2.19E-01 |
| RNU6-553P      | -0.23 | 2.35E-01 | -0.24 | 2.19E-01 |
| RPL6           | 0.01  | 9.55E-01 | -0.24 | 2.19E-01 |
| SDR42E2        | -0.01 | 9.66E-01 | -0.24 | 2.19E-01 |
| SEPHS2         | 0.16  | 4.06E-01 | 0.24  | 2.19E-01 |
| SERBP1P1       | -0.10 | 6.07E-01 | 0.24  | 2.19E-01 |
| SGIP1          | -0.18 | 3.49E-01 | 0.24  | 2.19E-01 |
| SLC45A4        | -0.37 | 5.23E-02 | -0.24 | 2.19E-01 |
| TMEM121        | -0.23 | 2.29E-01 | -0.24 | 2.19E-01 |
| ULK1           | 0.03  | 8.69E-01 | 0.24  | 2.19E-01 |
| A2MP1          | -0.20 | 3.00E-01 | -0.24 | 2.20E-01 |
| AC008592.5     | 0.00  | 9.92E-01 | -0.24 | 2.20E-01 |
| AC079949.1     | 0.30  | 1.16E-01 | -0.24 | 2.20E-01 |
| AC083873.4     | 0.15  | 4.54E-01 | 0.24  | 2.20E-01 |
| DCAF4L1        | 0.02  | 9.31E-01 | -0.24 | 2.20E-01 |
| G26215         | -0.17 | 3.96E-01 | -0.24 | 2.20E-01 |
| IFIT2          | 0.15  | 4.34E-01 | 0.24  | 2.20E-01 |
| LINC00882      | 0.07  | 7.29E-01 | -0.24 | 2.20E-01 |
| MYO16          | -0.09 | 6.45E-01 | -0.24 | 2.20E-01 |
| NAP1L1         | 0.02  | 9.15E-01 | -0.24 | 2.20E-01 |
| RNU4-21P       | -0.06 | 7.72E-01 | -0.24 | 2.20E-01 |
| RP11-100G15.12 | -0.11 | 5.70E-01 | -0.24 | 2.20E-01 |

|               |       |          |       |          |
|---------------|-------|----------|-------|----------|
| SNORA27       | -0.14 | 4.83E-01 | -0.24 | 2.20E-01 |
| TWISTNB       | 0.00  | 9.82E-01 | -0.24 | 2.20E-01 |
| UBR3          | -0.09 | 6.39E-01 | -0.24 | 2.20E-01 |
| PWAR5         | 0.04  | 8.30E-01 | -0.24 | 2.21E-01 |
| RNU5D-1       | 0.04  | 8.21E-01 | 0.24  | 2.21E-01 |
| RP11-413G15.1 | -0.17 | 3.80E-01 | -0.24 | 2.21E-01 |
| RP11-638I2.9  | 0.02  | 9.28E-01 | 0.24  | 2.21E-01 |
| SEPT7P1       | 0.29  | 1.36E-01 | -0.24 | 2.21E-01 |
| SGCB          | -0.14 | 4.91E-01 | -0.24 | 2.21E-01 |
| XLOC_011520   | 0.14  | 4.71E-01 | 0.24  | 2.21E-01 |
| AARD          | -0.19 | 3.25E-01 | -0.24 | 2.21E-01 |
| ARF3          | 0.35  | 6.66E-02 | 0.24  | 2.21E-01 |
| GNRHR         | 0.04  | 8.29E-01 | -0.24 | 2.21E-01 |
| GTSE1-AS1     | 0.20  | 2.98E-01 | -0.24 | 2.21E-01 |
| KLRF1         | -0.21 | 2.91E-01 | -0.24 | 2.21E-01 |
| KRI1          | -0.07 | 7.10E-01 | 0.24  | 2.21E-01 |
| LINC00618     | 0.10  | 6.05E-01 | -0.24 | 2.21E-01 |
| MANSC4        | 0.12  | 5.47E-01 | -0.24 | 2.21E-01 |
| RN7SL414P     | -0.03 | 8.86E-01 | -0.24 | 2.21E-01 |
| RP11-39E3.5   | 0.03  | 8.93E-01 | 0.24  | 2.21E-01 |
| RP11-540O11.1 | 0.09  | 6.58E-01 | -0.24 | 2.21E-01 |
| RP11-5407.3   | -0.18 | 3.61E-01 | 0.24  | 2.21E-01 |
| RWDD4         | 0.10  | 6.11E-01 | -0.24 | 2.21E-01 |
| SLC2A12       | 0.14  | 4.76E-01 | -0.24 | 2.21E-01 |
| XLOC_014400   | 0.23  | 2.47E-01 | -0.24 | 2.21E-01 |
| ZNF470        | 0.06  | 7.76E-01 | -0.24 | 2.21E-01 |
| BCRP8         | -0.09 | 6.38E-01 | 0.24  | 2.22E-01 |
| CARD16        | 0.16  | 4.27E-01 | 0.24  | 2.22E-01 |
| CH17-76K2.6   | -0.14 | 4.87E-01 | -0.24 | 2.22E-01 |
| CTD-2328D6.1  | 0.36  | 5.68E-02 | -0.24 | 2.22E-01 |
| DGKH          | -0.01 | 9.65E-01 | -0.24 | 2.22E-01 |
| IL27RA        | 0.06  | 7.60E-01 | 0.24  | 2.22E-01 |
| MACROD2-IT1   | -0.10 | 5.96E-01 | -0.24 | 2.22E-01 |
| MARCO         | 0.15  | 4.35E-01 | 0.24  | 2.22E-01 |
| NTN3          | 0.06  | 7.62E-01 | 0.24  | 2.22E-01 |
| PTCH1         | -0.32 | 9.27E-02 | -0.24 | 2.22E-01 |
| RN7SK         | -0.03 | 8.65E-01 | 0.24  | 2.22E-01 |
| RNF152        | 0.41  | 3.19E-02 | 0.24  | 2.22E-01 |
| RP11-178L8.5  | -0.17 | 4.00E-01 | -0.24 | 2.22E-01 |
| SMCO4         | 0.33  | 8.45E-02 | 0.24  | 2.22E-01 |
| SRRM2-AS1     | 0.12  | 5.52E-01 | -0.24 | 2.22E-01 |
| STAG1         | -0.20 | 3.05E-01 | -0.24 | 2.22E-01 |
| TSSK6         | -0.19 | 3.29E-01 | -0.24 | 2.22E-01 |
| ZKSCAN5       | 0.01  | 9.47E-01 | 0.24  | 2.22E-01 |
| CCDC77        | 0.11  | 5.89E-01 | 0.24  | 2.22E-01 |
| CLVS1         | 0.21  | 2.72E-01 | -0.24 | 2.22E-01 |
| DCST2         | -0.14 | 4.75E-01 | -0.24 | 2.22E-01 |

|                |       |          |       |          |
|----------------|-------|----------|-------|----------|
| DUS2           | 0.55  | 2.49E-03 | 0.24  | 2.22E-01 |
| EEF1DP4        | -0.09 | 6.47E-01 | -0.24 | 2.22E-01 |
| EEF2K          | -0.10 | 6.04E-01 | -0.24 | 2.22E-01 |
| KDELR3         | -0.18 | 3.52E-01 | -0.24 | 2.22E-01 |
| KLF7           | 0.27  | 1.72E-01 | 0.24  | 2.22E-01 |
| LINC01277      | 0.09  | 6.43E-01 | 0.24  | 2.22E-01 |
| RP11-254I22.3  | -0.08 | 6.83E-01 | 0.24  | 2.22E-01 |
| RP11-561B11.1  | 0.12  | 5.34E-01 | 0.24  | 2.22E-01 |
| TADA2A         | 0.21  | 2.79E-01 | 0.24  | 2.22E-01 |
| UCP2           | 0.19  | 3.24E-01 | 0.24  | 2.22E-01 |
| XLOC_008611    | -0.30 | 1.27E-01 | -0.24 | 2.22E-01 |
| ZNF540         | -0.25 | 2.04E-01 | -0.24 | 2.22E-01 |
| ZNF573         | -0.07 | 7.05E-01 | -0.24 | 2.22E-01 |
| CTC-479C5.11   | 0.12  | 5.41E-01 | -0.24 | 2.23E-01 |
| ETAA1          | 0.04  | 8.44E-01 | -0.24 | 2.23E-01 |
| FAR2P2         | -0.44 | 1.79E-02 | -0.24 | 2.23E-01 |
| HMGB1P41       | -0.01 | 9.57E-01 | -0.24 | 2.23E-01 |
| MTCO3P15       | -0.39 | 3.82E-02 | -0.24 | 2.23E-01 |
| NFAT5          | -0.04 | 8.27E-01 | -0.24 | 2.23E-01 |
| RP11-32B5.1    | 0.00  | 9.86E-01 | -0.24 | 2.23E-01 |
| RP11-347C12.11 | -0.04 | 8.27E-01 | -0.24 | 2.23E-01 |
| RP11-572M11.3  | -0.17 | 3.89E-01 | -0.24 | 2.23E-01 |
| TAF1D          | 0.01  | 9.54E-01 | -0.24 | 2.23E-01 |
| USF3           | 0.05  | 7.83E-01 | -0.24 | 2.23E-01 |
| ZNF610         | 0.05  | 8.10E-01 | -0.24 | 2.23E-01 |
| ARHGAP4        | -0.22 | 2.50E-01 | 0.24  | 2.23E-01 |
| C16orf70       | 0.19  | 3.22E-01 | 0.24  | 2.23E-01 |
| CHRFAM7A       | -0.11 | 5.60E-01 | 0.24  | 2.23E-01 |
| FABP6          | -0.12 | 5.54E-01 | 0.24  | 2.23E-01 |
| GDF10          | -0.25 | 2.08E-01 | 0.24  | 2.23E-01 |
| PEX16          | 0.13  | 5.07E-01 | 0.24  | 2.23E-01 |
| RP11-175B9.3   | -0.08 | 6.75E-01 | 0.24  | 2.23E-01 |
| CDK5R1         | 0.28  | 1.48E-01 | 0.24  | 2.24E-01 |
| COL6A3         | -0.13 | 5.19E-01 | 0.24  | 2.24E-01 |
| CTAGE8         | -0.32 | 1.01E-01 | -0.24 | 2.24E-01 |
| CTC-429L19.3   | 0.01  | 9.60E-01 | -0.24 | 2.24E-01 |
| FAM129A        | 0.08  | 6.81E-01 | -0.24 | 2.24E-01 |
| G29048         | 0.02  | 9.13E-01 | -0.24 | 2.24E-01 |
| LIPN           | -0.06 | 7.46E-01 | -0.24 | 2.24E-01 |
| MIR571         | -0.30 | 1.23E-01 | -0.24 | 2.24E-01 |
| RP11-181D18.4  | -0.30 | 1.25E-01 | -0.24 | 2.24E-01 |
| RP5-839B4.8    | 0.05  | 8.19E-01 | -0.24 | 2.24E-01 |
| TRAV13-1       | 0.20  | 3.16E-01 | 0.24  | 2.24E-01 |
| ZNF417         | 0.07  | 7.36E-01 | -0.24 | 2.24E-01 |
| CBFA2T2        | -0.13 | 4.97E-01 | 0.24  | 2.24E-01 |
| DBH-AS1        | 0.08  | 6.73E-01 | 0.24  | 2.24E-01 |
| EPHA2          | 0.20  | 3.00E-01 | 0.24  | 2.24E-01 |

|                |       |          |       |          |
|----------------|-------|----------|-------|----------|
| G10706         | 0.35  | 6.75E-02 | 0.24  | 2.24E-01 |
| G28649         | 0.07  | 7.20E-01 | -0.24 | 2.24E-01 |
| HSPA14         | 0.13  | 4.97E-01 | -0.24 | 2.24E-01 |
| KDM4A          | 0.25  | 2.01E-01 | 0.24  | 2.24E-01 |
| LRRC40         | 0.05  | 8.05E-01 | -0.24 | 2.24E-01 |
| MLF1           | -0.30 | 1.25E-01 | -0.24 | 2.24E-01 |
| NDRG1          | 0.10  | 6.21E-01 | 0.24  | 2.24E-01 |
| NT5C1B         | -0.29 | 1.39E-01 | 0.24  | 2.24E-01 |
| PDE6B          | -0.16 | 4.29E-01 | -0.24 | 2.24E-01 |
| RP11-399K21.14 | -0.09 | 6.56E-01 | 0.24  | 2.24E-01 |
| RP11-996F15.6  | -0.21 | 2.75E-01 | -0.24 | 2.24E-01 |
| SLC16A13       | 0.15  | 4.40E-01 | 0.24  | 2.24E-01 |
| AL162151.3     | 0.13  | 5.15E-01 | 0.24  | 2.25E-01 |
| CCIN           | -0.03 | 8.62E-01 | -0.24 | 2.25E-01 |
| CD276          | -0.05 | 7.98E-01 | 0.24  | 2.25E-01 |
| CEP250         | -0.14 | 4.86E-01 | 0.24  | 2.25E-01 |
| CTAGE7P        | 0.03  | 8.67E-01 | -0.24 | 2.25E-01 |
| CTB-113P19.3   | -0.08 | 6.69E-01 | 0.24  | 2.25E-01 |
| CTC-209L16.1   | -0.32 | 9.50E-02 | 0.24  | 2.25E-01 |
| CTD-2619J13.16 | -0.22 | 2.51E-01 | 0.24  | 2.25E-01 |
| GALNT15        | 0.04  | 8.59E-01 | 0.24  | 2.25E-01 |
| GRM8           | -0.15 | 4.34E-01 | 0.24  | 2.25E-01 |
| GSTA9P         | 0.33  | 8.29E-02 | 0.24  | 2.25E-01 |
| HGF            | 0.18  | 3.50E-01 | -0.24 | 2.25E-01 |
| MIR2355        | 0.17  | 3.83E-01 | 0.24  | 2.25E-01 |
| RP11-105N14.1  | -0.05 | 7.96E-01 | -0.24 | 2.25E-01 |
| RP11-660L16.2  | 0.30  | 1.16E-01 | -0.24 | 2.25E-01 |
| RP11-907D1.3   | 0.07  | 7.10E-01 | -0.24 | 2.25E-01 |
| SHC2           | -0.06 | 7.54E-01 | 0.24  | 2.25E-01 |
| SNRPCP16       | 0.13  | 5.01E-01 | -0.24 | 2.25E-01 |
| SYCE2          | -0.35 | 7.17E-02 | -0.24 | 2.25E-01 |
| TRAJ11         | -0.20 | 2.97E-01 | 0.24  | 2.25E-01 |
| ZNF251         | -0.11 | 5.62E-01 | -0.24 | 2.25E-01 |
| ANAPC7         | 0.22  | 2.60E-01 | 0.24  | 2.25E-01 |
| BCR            | 0.29  | 1.33E-01 | 0.24  | 2.25E-01 |
| CAAP1          | 0.18  | 3.59E-01 | -0.24 | 2.25E-01 |
| CTD-2014D20.1  | -0.21 | 2.79E-01 | 0.24  | 2.25E-01 |
| CTD-2600O9.1   | -0.10 | 6.09E-01 | -0.24 | 2.25E-01 |
| EGLN3-AS1      | -0.43 | 2.30E-02 | -0.24 | 2.25E-01 |
| GNAO1          | 0.20  | 3.09E-01 | 0.24  | 2.25E-01 |
| GPR3           | 0.12  | 5.56E-01 | -0.24 | 2.25E-01 |
| HRSP12         | 0.07  | 7.22E-01 | 0.24  | 2.25E-01 |
| KANK4          | -0.24 | 2.15E-01 | -0.24 | 2.25E-01 |
| KB-68A7.1      | -0.34 | 7.89E-02 | -0.24 | 2.25E-01 |
| LRMP           | -0.34 | 8.08E-02 | -0.24 | 2.25E-01 |
| OLR1           | -0.02 | 9.04E-01 | 0.24  | 2.25E-01 |
| RNU6-1         | -0.14 | 4.86E-01 | 0.24  | 2.25E-01 |

|                      |       |          |       |          |
|----------------------|-------|----------|-------|----------|
| <b>RNU6-856P</b>     | -0.09 | 6.56E-01 | -0.24 | 2.25E-01 |
| <b>RP1-167F1.2</b>   | -0.19 | 3.37E-01 | -0.24 | 2.25E-01 |
| <b>RP11-16E18.3</b>  | 0.20  | 3.00E-01 | -0.24 | 2.25E-01 |
| <b>RP11-641A6.3</b>  | 0.00  | 9.93E-01 | -0.24 | 2.25E-01 |
| <b>RP11-66H6.3</b>   | 0.08  | 7.03E-01 | -0.24 | 2.25E-01 |
| <b>RP11-764D10.2</b> | -0.03 | 8.62E-01 | 0.24  | 2.25E-01 |
| <b>RP3-472M2.2</b>   | -0.11 | 5.79E-01 | -0.24 | 2.25E-01 |
| <b>SERBP1P6</b>      | -0.40 | 3.70E-02 | 0.24  | 2.25E-01 |
| <b>SH2B2</b>         | 0.38  | 4.66E-02 | 0.24  | 2.25E-01 |
| <b>SLC30A9</b>       | 0.16  | 4.23E-01 | -0.24 | 2.25E-01 |
| <b>SPRR2A</b>        | 0.26  | 1.81E-01 | 0.24  | 2.25E-01 |
| <b>TAF9P3</b>        | -0.49 | 7.67E-03 | -0.24 | 2.25E-01 |
| <b>TMEM116</b>       | -0.29 | 1.28E-01 | -0.24 | 2.25E-01 |
| <b>TMEM217</b>       | 0.02  | 9.36E-01 | -0.24 | 2.25E-01 |
| <b>YOD1</b>          | 0.07  | 7.05E-01 | 0.24  | 2.25E-01 |
| <b>BRINP1</b>        | 0.45  | 1.65E-02 | 0.24  | 2.26E-01 |
| <b>C1orf134</b>      | -0.03 | 8.75E-01 | 0.24  | 2.26E-01 |
| <b>CLU10S</b>        | 0.50  | 6.78E-03 | 0.24  | 2.26E-01 |
| <b>FGD5</b>          | -0.22 | 2.54E-01 | 0.24  | 2.26E-01 |
| <b>G25674</b>        | -0.04 | 8.41E-01 | -0.24 | 2.26E-01 |
| <b>GOSR2</b>         | 0.39  | 4.20E-02 | 0.24  | 2.26E-01 |
| <b>HELQ</b>          | -0.18 | 3.69E-01 | -0.24 | 2.26E-01 |
| <b>LDHAP2</b>        | -0.36 | 5.74E-02 | -0.24 | 2.26E-01 |
| <b>PISD</b>          | -0.11 | 5.86E-01 | -0.24 | 2.26E-01 |
| <b>RP11-360L9.4</b>  | 0.31  | 1.07E-01 | -0.24 | 2.26E-01 |
| <b>RP11-87H9.3</b>   | -0.11 | 5.60E-01 | -0.24 | 2.26E-01 |
| <b>RP3-476K8.3</b>   | -0.04 | 8.41E-01 | -0.24 | 2.26E-01 |
| <b>RPS29P22</b>      | 0.00  | 9.94E-01 | -0.24 | 2.26E-01 |
| <b>STX19</b>         | 0.31  | 1.05E-01 | 0.24  | 2.26E-01 |
| <b>TMEM232</b>       | 0.29  | 1.28E-01 | -0.24 | 2.26E-01 |
| <b>TMEM45A</b>       | 0.24  | 2.24E-01 | 0.24  | 2.26E-01 |
| <b>CCDC74BP1</b>     | -0.26 | 1.88E-01 | 0.24  | 2.27E-01 |
| <b>CXCL2</b>         | 0.00  | 9.81E-01 | 0.24  | 2.27E-01 |
| <b>G15642</b>        | 0.27  | 1.59E-01 | 0.24  | 2.27E-01 |
| <b>G31357</b>        | -0.07 | 7.35E-01 | 0.24  | 2.27E-01 |
| <b>MIR1271</b>       | 0.03  | 8.98E-01 | 0.24  | 2.27E-01 |
| <b>RP11-296K13.4</b> | 0.35  | 6.57E-02 | 0.24  | 2.27E-01 |
| <b>SLC6A11</b>       | 0.16  | 4.03E-01 | 0.24  | 2.27E-01 |
| <b>AC004549.6</b>    | -0.02 | 9.04E-01 | -0.24 | 2.27E-01 |
| <b>AC098824.6</b>    | 0.22  | 2.61E-01 | -0.24 | 2.27E-01 |
| <b>CRISPLD1</b>      | -0.28 | 1.51E-01 | -0.24 | 2.27E-01 |
| <b>ELOVL5</b>        | 0.27  | 1.58E-01 | -0.24 | 2.27E-01 |
| <b>ESRRG</b>         | 0.05  | 8.02E-01 | -0.24 | 2.27E-01 |
| <b>FRG1</b>          | -0.08 | 6.78E-01 | -0.24 | 2.27E-01 |
| <b>RNU6-1156P</b>    | 0.18  | 3.55E-01 | -0.24 | 2.27E-01 |
| <b>RP3-354N19.3</b>  | 0.10  | 6.03E-01 | -0.24 | 2.27E-01 |
| <b>RP4-545C24.1</b>  | 0.28  | 1.52E-01 | -0.24 | 2.27E-01 |

|               |       |          |       |          |
|---------------|-------|----------|-------|----------|
| SFSWAP        | -0.25 | 1.93E-01 | -0.24 | 2.27E-01 |
| SLC7A6        | -0.38 | 4.61E-02 | -0.24 | 2.27E-01 |
| SNORD116-18   | 0.20  | 3.19E-01 | -0.24 | 2.27E-01 |
| AGBL4         | -0.32 | 9.59E-02 | -0.24 | 2.27E-01 |
| C10orf76      | 0.04  | 8.23E-01 | 0.24  | 2.27E-01 |
| CTD-2313N18.8 | -0.07 | 7.19E-01 | -0.24 | 2.27E-01 |
| FAM160A1      | 0.05  | 8.07E-01 | 0.24  | 2.27E-01 |
| FER1L5        | -0.11 | 5.82E-01 | -0.24 | 2.27E-01 |
| GLYATL1P4     | 0.05  | 7.95E-01 | 0.24  | 2.27E-01 |
| GPX4          | -0.08 | 6.82E-01 | 0.24  | 2.27E-01 |
| HOPX          | -0.25 | 2.00E-01 | -0.24 | 2.27E-01 |
| P2RX5-TAX1BP3 | -0.12 | 5.29E-01 | -0.24 | 2.27E-01 |
| RP11-230G5.2  | 0.24  | 2.15E-01 | -0.24 | 2.27E-01 |
| RP11-239C9.1  | -0.15 | 4.53E-01 | 0.24  | 2.27E-01 |
| RP11-264I13.2 | 0.02  | 9.05E-01 | -0.24 | 2.27E-01 |
| RP11-295P9.12 | -0.50 | 6.34E-03 | -0.24 | 2.27E-01 |
| RP11-96C23.13 | -0.17 | 3.78E-01 | -0.24 | 2.27E-01 |
| SUCLG2        | 0.17  | 3.94E-01 | -0.24 | 2.27E-01 |
| TAS2R60       | 0.28  | 1.42E-01 | -0.24 | 2.27E-01 |
| WDR77         | 0.17  | 3.87E-01 | 0.24  | 2.27E-01 |
| YEATS4        | 0.17  | 3.89E-01 | -0.24 | 2.27E-01 |
| AIFM2         | -0.18 | 3.63E-01 | -0.24 | 2.28E-01 |
| AP000859.4    | -0.12 | 5.28E-01 | -0.24 | 2.28E-01 |
| APC           | -0.15 | 4.60E-01 | -0.24 | 2.28E-01 |
| C12orf66      | 0.06  | 7.73E-01 | -0.24 | 2.28E-01 |
| G19167        | 0.06  | 7.66E-01 | -0.24 | 2.28E-01 |
| NALT1         | -0.27 | 1.59E-01 | -0.24 | 2.28E-01 |
| RBM14-RBM4    | 0.07  | 7.14E-01 | -0.24 | 2.28E-01 |
| RP11-417L19.4 | 0.01  | 9.42E-01 | -0.24 | 2.28E-01 |
| RP11-449G16.1 | -0.15 | 4.51E-01 | -0.24 | 2.28E-01 |
| DFFA          | 0.30  | 1.18E-01 | 0.24  | 2.28E-01 |
| PLEKHM2       | 0.06  | 7.58E-01 | 0.24  | 2.28E-01 |
| RN7SL206P     | 0.31  | 1.07E-01 | 0.24  | 2.28E-01 |
| RNA5SP217     | 0.05  | 7.98E-01 | 0.24  | 2.28E-01 |
| SMAD7         | 0.01  | 9.61E-01 | 0.24  | 2.28E-01 |
| SNX11         | 0.14  | 4.86E-01 | 0.24  | 2.28E-01 |
| ULBP2         | 0.17  | 3.76E-01 | 0.24  | 2.28E-01 |
| ZBTB1         | 0.12  | 5.44E-01 | 0.24  | 2.28E-01 |
| AC007879.5    | -0.15 | 4.52E-01 | -0.24 | 2.28E-01 |
| AKT3          | -0.39 | 4.20E-02 | -0.24 | 2.28E-01 |
| C12orf73      | 0.18  | 3.63E-01 | -0.24 | 2.28E-01 |
| CTC-246B18.10 | -0.14 | 4.75E-01 | 0.24  | 2.28E-01 |
| GUCA2B        | -0.17 | 3.76E-01 | -0.24 | 2.28E-01 |
| HSPB1P1       | -0.11 | 5.80E-01 | 0.24  | 2.28E-01 |
| PAK4          | 0.22  | 2.64E-01 | 0.24  | 2.28E-01 |
| PCA3          | -0.06 | 7.44E-01 | 0.24  | 2.28E-01 |
| PTPN3         | -0.16 | 4.08E-01 | -0.24 | 2.28E-01 |



|                      |       |          |       |          |
|----------------------|-------|----------|-------|----------|
| <b>PYCARD</b>        | 0.06  | 7.45E-01 | 0.24  | 2.28E-01 |
| <b>RNY1P4</b>        | 0.20  | 3.05E-01 | 0.24  | 2.28E-01 |
| <b>RP11-16P6.1</b>   | 0.09  | 6.45E-01 | -0.24 | 2.28E-01 |
| <b>RP11-379F4.8</b>  | -0.33 | 8.29E-02 | -0.24 | 2.28E-01 |
| <b>RP4-535B20.4</b>  | 0.05  | 7.97E-01 | -0.24 | 2.28E-01 |
| <b>UPK2</b>          | 0.02  | 9.38E-01 | -0.24 | 2.28E-01 |
| <b>VEGFA</b>         | -0.16 | 4.12E-01 | 0.24  | 2.28E-01 |
| <b>XLOC_007053</b>   | 0.09  | 6.40E-01 | 0.24  | 2.28E-01 |
| <b>XLOC_008269</b>   | 0.03  | 8.62E-01 | 0.24  | 2.28E-01 |
| <b>AC068641.1</b>    | -0.41 | 3.18E-02 | -0.24 | 2.29E-01 |
| <b>ALDH9A1</b>       | 0.20  | 3.01E-01 | 0.24  | 2.29E-01 |
| <b>C8orf34-AS1</b>   | 0.18  | 3.70E-01 | -0.24 | 2.29E-01 |
| <b>CAMK1G</b>        | -0.27 | 1.66E-01 | 0.24  | 2.29E-01 |
| <b>EDN2</b>          | -0.17 | 3.83E-01 | 0.24  | 2.29E-01 |
| <b>FBXO16</b>        | -0.15 | 4.33E-01 | 0.24  | 2.29E-01 |
| <b>G25462</b>        | -0.38 | 4.56E-02 | -0.24 | 2.29E-01 |
| <b>G26243</b>        | -0.07 | 7.22E-01 | 0.24  | 2.29E-01 |
| <b>HOXC6</b>         | -0.10 | 5.99E-01 | 0.24  | 2.29E-01 |
| <b>IDH1</b>          | 0.31  | 1.04E-01 | 0.24  | 2.29E-01 |
| <b>MIR646HG</b>      | -0.20 | 3.19E-01 | -0.24 | 2.29E-01 |
| <b>PEAR1</b>         | -0.18 | 3.69E-01 | 0.24  | 2.29E-01 |
| <b>PFKFB2</b>        | 0.18  | 3.68E-01 | 0.24  | 2.29E-01 |
| <b>PIGFP2</b>        | -0.18 | 3.57E-01 | -0.24 | 2.29E-01 |
| <b>RNU6-431P</b>     | 0.12  | 5.53E-01 | -0.24 | 2.29E-01 |
| <b>RP11-10L12.1</b>  | 0.07  | 7.19E-01 | -0.24 | 2.29E-01 |
| <b>RP11-480N24.4</b> | -0.07 | 7.15E-01 | -0.24 | 2.29E-01 |
| <b>RP11-73G16.1</b>  | -0.12 | 5.54E-01 | -0.24 | 2.29E-01 |
| <b>RP4-647C14.2</b>  | -0.07 | 7.14E-01 | 0.24  | 2.29E-01 |
| <b>SCG5</b>          | -0.14 | 4.83E-01 | -0.24 | 2.29E-01 |
| <b>SLAMF8</b>        | 0.16  | 4.19E-01 | 0.24  | 2.29E-01 |
| <b>SNORA71D</b>      | 0.02  | 9.16E-01 | 0.24  | 2.29E-01 |
| <b>SNX1</b>          | -0.09 | 6.48E-01 | 0.24  | 2.29E-01 |
| <b>TUBD1</b>         | 0.35  | 7.08E-02 | 0.24  | 2.29E-01 |
| <b>AIFM3</b>         | -0.07 | 7.10E-01 | -0.24 | 2.30E-01 |
| <b>AP001623.1</b>    | -0.06 | 7.69E-01 | 0.24  | 2.30E-01 |
| <b>CACNA1G</b>       | 0.01  | 9.61E-01 | -0.24 | 2.30E-01 |
| <b>CYP1B1</b>        | -0.16 | 4.08E-01 | -0.24 | 2.30E-01 |
| <b>GLYCTK</b>        | 0.24  | 2.14E-01 | 0.24  | 2.30E-01 |
| <b>GNG2</b>          | -0.08 | 6.81E-01 | -0.24 | 2.30E-01 |
| <b>KRTAP12-2</b>     | -0.29 | 1.41E-01 | 0.24  | 2.30E-01 |
| <b>LOC440461</b>     | 0.10  | 5.99E-01 | 0.24  | 2.30E-01 |
| <b>MAFA</b>          | 0.14  | 4.91E-01 | 0.24  | 2.30E-01 |
| <b>PPIAP16</b>       | -0.10 | 6.07E-01 | -0.24 | 2.30E-01 |
| <b>PPP1R36</b>       | -0.13 | 5.00E-01 | -0.24 | 2.30E-01 |
| <b>RP11-341G23.4</b> | 0.03  | 8.97E-01 | 0.24  | 2.30E-01 |
| <b>RP11-478B9.3</b>  | -0.18 | 3.61E-01 | -0.24 | 2.30E-01 |
| <b>RP4-781K5.9</b>   | 0.21  | 2.87E-01 | -0.24 | 2.30E-01 |

|               |       |          |       |          |
|---------------|-------|----------|-------|----------|
| SMG7          | 0.04  | 8.29E-01 | 0.24  | 2.30E-01 |
| SPDYE18       | -0.09 | 6.49E-01 | -0.24 | 2.30E-01 |
| TMEM134       | -0.24 | 2.14E-01 | 0.24  | 2.30E-01 |
| TRAJ22        | -0.06 | 7.71E-01 | -0.24 | 2.30E-01 |
| ZNF101        | 0.20  | 3.01E-01 | 0.24  | 2.30E-01 |
| AC008703.1    | 0.35  | 7.03E-02 | 0.24  | 2.30E-01 |
| ACSL1         | 0.01  | 9.44E-01 | -0.24 | 2.30E-01 |
| CCDC160       | 0.28  | 1.45E-01 | -0.24 | 2.30E-01 |
| CTB-114C7.4   | -0.10 | 6.29E-01 | 0.24  | 2.30E-01 |
| CTD-2358C21.5 | 0.04  | 8.53E-01 | -0.24 | 2.30E-01 |
| CYP8B1        | -0.27 | 1.59E-01 | 0.24  | 2.30E-01 |
| G12186        | 0.18  | 3.71E-01 | -0.24 | 2.30E-01 |
| G30008        | -0.36 | 6.30E-02 | -0.24 | 2.30E-01 |
| ITGB1         | -0.15 | 4.49E-01 | -0.24 | 2.30E-01 |
| MAP3K9        | 0.11  | 5.65E-01 | 0.24  | 2.30E-01 |
| MIR4802       | -0.03 | 8.90E-01 | 0.24  | 2.30E-01 |
| RAB31         | 0.21  | 2.89E-01 | 0.24  | 2.30E-01 |
| RNU6-1306P    | 0.24  | 2.15E-01 | 0.24  | 2.30E-01 |
| RP11-109J4.1  | 0.15  | 4.32E-01 | 0.24  | 2.30E-01 |
| RP4-758J18.7  | -0.05 | 8.10E-01 | 0.24  | 2.30E-01 |
| RPS2P39       | -0.18 | 3.55E-01 | -0.24 | 2.30E-01 |
| RPS6KC1       | -0.16 | 4.09E-01 | -0.24 | 2.30E-01 |
| SNX22         | 0.44  | 1.90E-02 | 0.24  | 2.30E-01 |
| TLL10         | -0.07 | 7.29E-01 | -0.24 | 2.30E-01 |
| AC010733.5    | 0.05  | 8.00E-01 | -0.24 | 2.31E-01 |
| CYP4F3        | 0.05  | 7.99E-01 | -0.24 | 2.31E-01 |
| FOSB          | -0.06 | 7.81E-01 | -0.24 | 2.31E-01 |
| GLT6D1        | -0.02 | 9.03E-01 | -0.24 | 2.31E-01 |
| MIR4423       | 0.13  | 4.94E-01 | -0.24 | 2.31E-01 |
| RBP7          | -0.15 | 4.40E-01 | -0.24 | 2.31E-01 |
| RP11-57H12.3  | -0.27 | 1.66E-01 | -0.24 | 2.31E-01 |
| RP11-775C24.5 | 0.35  | 6.50E-02 | 0.24  | 2.31E-01 |
| RP13-317D12.3 | 0.37  | 5.37E-02 | 0.24  | 2.31E-01 |
| RP4-584D14.5  | 0.27  | 1.67E-01 | 0.24  | 2.31E-01 |
| SLC28A3       | 0.28  | 1.42E-01 | 0.24  | 2.31E-01 |
| TMEM63B       | 0.04  | 8.59E-01 | 0.24  | 2.31E-01 |
| WDR91         | 0.21  | 2.90E-01 | 0.24  | 2.31E-01 |
| XLOC_007925   | -0.44 | 1.80E-02 | -0.24 | 2.31E-01 |
| ZRANB1        | 0.07  | 7.14E-01 | 0.24  | 2.31E-01 |
| AURKC         | 0.22  | 2.59E-01 | 0.24  | 2.31E-01 |
| CEP41         | -0.08 | 7.02E-01 | 0.24  | 2.31E-01 |
| FGD5P1        | 0.10  | 6.13E-01 | 0.24  | 2.31E-01 |
| FMR1-AS1      | -0.25 | 2.04E-01 | 0.24  | 2.31E-01 |
| FOLR2         | 0.02  | 9.12E-01 | 0.24  | 2.31E-01 |
| G32188        | 0.30  | 1.23E-01 | 0.24  | 2.31E-01 |
| HMBS          | -0.05 | 7.98E-01 | 0.24  | 2.31E-01 |
| RP11-39C10.1  | -0.22 | 2.53E-01 | 0.24  | 2.31E-01 |

|                 |       |          |       |          |
|-----------------|-------|----------|-------|----------|
| RP11-9L18.2     | 0.14  | 4.77E-01 | 0.24  | 2.31E-01 |
| RP4-633O19__A.1 | 0.32  | 9.74E-02 | 0.24  | 2.31E-01 |
| SNORA38B        | 0.04  | 8.58E-01 | 0.24  | 2.31E-01 |
| TMEM186         | -0.01 | 9.69E-01 | 0.24  | 2.31E-01 |
| YIPF3           | 0.03  | 8.67E-01 | 0.24  | 2.31E-01 |
| ZG16B           | 0.08  | 6.91E-01 | 0.24  | 2.31E-01 |
| C15orf41        | -0.24 | 2.12E-01 | -0.24 | 2.31E-01 |
| HEPACAM2        | -0.23 | 2.36E-01 | -0.24 | 2.31E-01 |
| KLHL15          | 0.07  | 7.33E-01 | -0.24 | 2.31E-01 |
| LINC01208       | -0.07 | 7.24E-01 | -0.24 | 2.31E-01 |
| MRPL46          | 0.30  | 1.20E-01 | -0.24 | 2.31E-01 |
| RP11-1096G20.5  | -0.24 | 2.14E-01 | -0.24 | 2.31E-01 |
| RP5-933K21.3    | 0.14  | 4.90E-01 | -0.24 | 2.31E-01 |
| RPL34-AS1       | 0.01  | 9.65E-01 | -0.24 | 2.31E-01 |
| TMEM243         | 0.23  | 2.48E-01 | -0.24 | 2.31E-01 |
| ZNF224          | -0.10 | 6.24E-01 | -0.24 | 2.31E-01 |
| ABC4            | -0.30 | 1.21E-01 | -0.24 | 2.32E-01 |
| BX088645.3      | -0.60 | 7.57E-04 | -0.24 | 2.32E-01 |
| CSDAP1          | -0.25 | 1.93E-01 | 0.24  | 2.32E-01 |
| CTB-43E15.1     | 0.12  | 5.45E-01 | -0.24 | 2.32E-01 |
| FEZ2            | 0.04  | 8.23E-01 | -0.24 | 2.32E-01 |
| MKX             | 0.09  | 6.40E-01 | 0.24  | 2.32E-01 |
| NAT10           | 0.04  | 8.46E-01 | 0.24  | 2.32E-01 |
| NMT1            | 0.22  | 2.53E-01 | 0.24  | 2.32E-01 |
| PRDM11          | -0.08 | 6.83E-01 | -0.24 | 2.32E-01 |
| RN7SL34P        | -0.01 | 9.71E-01 | 0.24  | 2.32E-01 |
| RNVU1-6         | 0.02  | 9.32E-01 | 0.24  | 2.32E-01 |
| RP11-384K6.8    | -0.07 | 7.26E-01 | -0.24 | 2.32E-01 |
| RP11-402L5.1    | -0.17 | 3.87E-01 | -0.24 | 2.32E-01 |
| RP11-466F5.3    | -0.10 | 6.20E-01 | 0.24  | 2.32E-01 |
| RP11-737O24.1   | -0.11 | 5.94E-01 | 0.24  | 2.32E-01 |
| RPL32P34        | -0.02 | 9.29E-01 | -0.24 | 2.32E-01 |
| SLC25A21-AS1    | -0.11 | 5.92E-01 | -0.24 | 2.32E-01 |
| SMC2-AS1        | 0.05  | 8.19E-01 | 0.24  | 2.32E-01 |
| SNORA70F        | -0.12 | 5.34E-01 | 0.24  | 2.32E-01 |
| TNC             | -0.18 | 3.72E-01 | 0.24  | 2.32E-01 |
| UBE2F-SCLY      | 0.26  | 1.82E-01 | -0.24 | 2.32E-01 |
| WDR43           | 0.13  | 5.19E-01 | -0.24 | 2.32E-01 |
| ZNF440          | -0.17 | 3.79E-01 | -0.24 | 2.32E-01 |
| ZNHIT3          | 0.00  | 9.83E-01 | 0.24  | 2.32E-01 |
| AIRE            | -0.25 | 2.04E-01 | -0.24 | 2.33E-01 |
| BRICD5          | 0.15  | 4.38E-01 | -0.24 | 2.33E-01 |
| CACNA1G-AS1     | -0.09 | 6.61E-01 | -0.24 | 2.33E-01 |
| CTPS2           | -0.16 | 4.18E-01 | -0.24 | 2.33E-01 |
| ERCC6L2         | -0.04 | 8.26E-01 | -0.24 | 2.33E-01 |
| FAM180A         | -0.24 | 2.22E-01 | 0.24  | 2.33E-01 |
| FOXRED2         | 0.26  | 1.75E-01 | 0.24  | 2.33E-01 |

|                |       |          |       |          |
|----------------|-------|----------|-------|----------|
| G18525         | 0.09  | 6.40E-01 | -0.24 | 2.33E-01 |
| IL1F10         | 0.14  | 4.67E-01 | -0.24 | 2.33E-01 |
| LINC01600      | -0.17 | 3.87E-01 | -0.24 | 2.33E-01 |
| MIR3909        | 0.00  | 9.97E-01 | -0.24 | 2.33E-01 |
| PEX19          | 0.31  | 1.03E-01 | -0.24 | 2.33E-01 |
| RP11-261P9.4   | -0.07 | 7.18E-01 | -0.24 | 2.33E-01 |
| RP11-267N12.1  | 0.19  | 3.34E-01 | -0.24 | 2.33E-01 |
| RPS2P41        | -0.12 | 5.36E-01 | -0.24 | 2.33E-01 |
| TAS2R4         | -0.34 | 8.00E-02 | -0.24 | 2.33E-01 |
| AGMAT          | -0.09 | 6.32E-01 | 0.24  | 2.33E-01 |
| AP001469.5     | -0.41 | 2.95E-02 | -0.24 | 2.33E-01 |
| CPQ            | -0.31 | 1.11E-01 | -0.24 | 2.33E-01 |
| DYRK1A         | -0.13 | 5.05E-01 | -0.24 | 2.33E-01 |
| FAHD2A         | -0.29 | 1.38E-01 | -0.24 | 2.33E-01 |
| GATA3          | -0.18 | 3.72E-01 | -0.24 | 2.33E-01 |
| PGRMC2         | -0.10 | 6.22E-01 | -0.24 | 2.33E-01 |
| RFTN1          | 0.10  | 6.02E-01 | 0.24  | 2.33E-01 |
| RP11-147L13.11 | -0.16 | 4.27E-01 | -0.24 | 2.33E-01 |
| RP11-544A12.4  | -0.11 | 5.76E-01 | -0.24 | 2.33E-01 |
| RP11-81A22.4   | 0.04  | 8.36E-01 | 0.24  | 2.33E-01 |
| TM7SF3         | -0.01 | 9.79E-01 | -0.24 | 2.33E-01 |
| DNAJB3         | -0.19 | 3.39E-01 | -0.24 | 2.34E-01 |
| G20694         | 0.02  | 9.14E-01 | -0.24 | 2.34E-01 |
| MERTK          | -0.19 | 3.31E-01 | -0.24 | 2.34E-01 |
| PLIN1          | 0.02  | 9.38E-01 | -0.24 | 2.34E-01 |
| RP11-272P10.2  | -0.09 | 6.32E-01 | -0.24 | 2.34E-01 |
| TFCP2L1        | 0.17  | 3.75E-01 | -0.24 | 2.34E-01 |
| TNFRSF11A      | -0.03 | 8.75E-01 | -0.24 | 2.34E-01 |
| ZNF583         | -0.05 | 8.07E-01 | -0.24 | 2.34E-01 |
| AC024569.1     | -0.26 | 1.82E-01 | 0.24  | 2.34E-01 |
| BCL2L1         | 0.34  | 7.32E-02 | 0.24  | 2.34E-01 |
| BHLHE22        | 0.12  | 5.39E-01 | 0.24  | 2.34E-01 |
| CCDC83         | -0.06 | 7.81E-01 | 0.24  | 2.34E-01 |
| MAS1L          | 0.05  | 7.91E-01 | 0.24  | 2.34E-01 |
| TMSB4Y         | 0.47  | 1.17E-02 | 0.24  | 2.34E-01 |
| AC006116.22    | -0.08 | 6.68E-01 | 0.24  | 2.35E-01 |
| CMYA5          | -0.12 | 5.42E-01 | -0.24 | 2.35E-01 |
| COL5A2         | -0.13 | 5.04E-01 | 0.24  | 2.35E-01 |
| EID1           | -0.09 | 6.59E-01 | -0.24 | 2.35E-01 |
| FHAD1          | 0.12  | 5.40E-01 | 0.24  | 2.35E-01 |
| IRF2BPL        | 0.33  | 8.42E-02 | 0.24  | 2.35E-01 |
| RP11-144O23.8  | -0.02 | 9.13E-01 | -0.24 | 2.35E-01 |
| RP11-318A15.2  | 0.55  | 2.69E-03 | 0.24  | 2.35E-01 |
| RP11-81A1.4    | -0.36 | 6.01E-02 | -0.24 | 2.35E-01 |
| RPL12P41       | 0.02  | 9.15E-01 | -0.24 | 2.35E-01 |
| STON1          | -0.47 | 1.09E-02 | -0.24 | 2.35E-01 |
| TMEM151A       | -0.09 | 6.53E-01 | -0.24 | 2.35E-01 |

|                       |       |          |       |          |
|-----------------------|-------|----------|-------|----------|
| <b>TMEM95</b>         | -0.17 | 3.80E-01 | -0.24 | 2.35E-01 |
| <b>TRIM34</b>         | -0.10 | 5.96E-01 | 0.24  | 2.35E-01 |
| <b>UBAP1</b>          | 0.09  | 6.41E-01 | 0.24  | 2.35E-01 |
| <b>WASH4P</b>         | -0.16 | 4.09E-01 | -0.24 | 2.35E-01 |
| <b>ZNF347</b>         | 0.02  | 9.05E-01 | -0.24 | 2.35E-01 |
| <b>AC023115.2</b>     | -0.05 | 8.17E-01 | -0.24 | 2.35E-01 |
| <b>ANKK1</b>          | 0.43  | 2.12E-02 | -0.24 | 2.35E-01 |
| <b>DCUN1D3</b>        | 0.37  | 5.27E-02 | 0.24  | 2.35E-01 |
| <b>DNAJB1</b>         | 0.26  | 1.84E-01 | 0.24  | 2.35E-01 |
| <b>DPYD-IT1</b>       | 0.29  | 1.29E-01 | 0.24  | 2.35E-01 |
| <b>EPCAM</b>          | -0.45 | 1.64E-02 | -0.24 | 2.35E-01 |
| <b>HSPE1P26</b>       | 0.05  | 8.16E-01 | 0.24  | 2.35E-01 |
| <b>IL17RA</b>         | -0.05 | 8.03E-01 | 0.24  | 2.35E-01 |
| <b>IMPG2</b>          | 0.32  | 1.02E-01 | -0.24 | 2.35E-01 |
| <b>LDLR</b>           | 0.27  | 1.67E-01 | 0.24  | 2.35E-01 |
| <b>LZTR1</b>          | 0.00  | 9.98E-01 | 0.24  | 2.35E-01 |
| <b>PATE4</b>          | -0.10 | 6.03E-01 | -0.24 | 2.35E-01 |
| <b>RP11-360I2.1</b>   | -0.16 | 4.16E-01 | -0.24 | 2.35E-01 |
| <b>RP11-422N16.3</b>  | -0.22 | 2.56E-01 | -0.24 | 2.35E-01 |
| <b>SHC1</b>           | 0.33  | 8.51E-02 | 0.24  | 2.35E-01 |
| <b>STIM1</b>          | 0.13  | 5.06E-01 | 0.24  | 2.35E-01 |
| <b>TMEM69</b>         | 0.22  | 2.59E-01 | 0.24  | 2.35E-01 |
| <b>UBE2E3</b>         | 0.00  | 9.91E-01 | 0.24  | 2.35E-01 |
| <b>DUSP16</b>         | 0.36  | 6.01E-02 | -0.24 | 2.36E-01 |
| <b>FERMT3</b>         | 0.23  | 2.40E-01 | 0.24  | 2.36E-01 |
| <b>FLJ46066</b>       | -0.25 | 2.08E-01 | -0.24 | 2.36E-01 |
| <b>GPCPD1</b>         | 0.31  | 1.09E-01 | -0.24 | 2.36E-01 |
| <b>IL26</b>           | 0.10  | 6.17E-01 | 0.24  | 2.36E-01 |
| <b>LA16c-316G12.2</b> | -0.27 | 1.61E-01 | -0.24 | 2.36E-01 |
| <b>LINC01214</b>      | 0.31  | 1.06E-01 | -0.24 | 2.36E-01 |
| <b>MIR938</b>         | -0.39 | 4.07E-02 | -0.24 | 2.36E-01 |
| <b>PRSS27</b>         | 0.32  | 9.65E-02 | 0.24  | 2.36E-01 |
| <b>RNU6-1026P</b>     | -0.11 | 5.73E-01 | -0.24 | 2.36E-01 |
| <b>RNU6ATAC7P</b>     | 0.28  | 1.48E-01 | -0.24 | 2.36E-01 |
| <b>RP11-1029J19.4</b> | 0.09  | 6.58E-01 | 0.24  | 2.36E-01 |
| <b>RP11-301L8.2</b>   | -0.14 | 4.79E-01 | -0.24 | 2.36E-01 |
| <b>RP11-486I11.2</b>  | -0.02 | 9.00E-01 | 0.24  | 2.36E-01 |
| <b>RP11-506H21.5</b>  | -0.21 | 2.78E-01 | 0.24  | 2.36E-01 |
| <b>TMEM64</b>         | 0.15  | 4.36E-01 | 0.24  | 2.36E-01 |
| <b>TMPRSS3</b>        | -0.05 | 8.07E-01 | -0.24 | 2.36E-01 |
| <b>AC068020.1</b>     | -0.43 | 2.17E-02 | -0.24 | 2.36E-01 |
| <b>AP000688.14</b>    | -0.34 | 7.22E-02 | -0.24 | 2.36E-01 |
| <b>ATAD2B</b>         | -0.06 | 7.59E-01 | -0.24 | 2.36E-01 |
| <b>ERGIC2</b>         | 0.01  | 9.44E-01 | -0.24 | 2.36E-01 |
| <b>FAM162A</b>        | 0.14  | 4.89E-01 | 0.24  | 2.36E-01 |
| <b>FMO3</b>           | -0.21 | 2.85E-01 | 0.24  | 2.36E-01 |
| <b>MYO18A</b>         | -0.03 | 8.88E-01 | 0.24  | 2.36E-01 |

|                       |       |          |       |          |
|-----------------------|-------|----------|-------|----------|
| <b>RN7SL333P</b>      | 0.13  | 5.24E-01 | -0.24 | 2.36E-01 |
| <b>RP11-109I13.2</b>  | -0.39 | 4.29E-02 | -0.24 | 2.36E-01 |
| <b>RP11-129I19.2</b>  | -0.30 | 1.15E-01 | -0.24 | 2.36E-01 |
| <b>RP11-85D18.1</b>   | -0.03 | 8.86E-01 | 0.24  | 2.36E-01 |
| <b>WBP2NL</b>         | -0.17 | 3.95E-01 | -0.24 | 2.36E-01 |
| <b>AC005083.1</b>     | -0.10 | 6.01E-01 | -0.24 | 2.37E-01 |
| <b>COL11A1</b>        | -0.12 | 5.29E-01 | -0.24 | 2.37E-01 |
| <b>G32994</b>         | 0.36  | 6.20E-02 | 0.24  | 2.37E-01 |
| <b>GPR37L1</b>        | 0.21  | 2.76E-01 | -0.24 | 2.37E-01 |
| <b>MEP1B</b>          | -0.28 | 1.44E-01 | -0.24 | 2.37E-01 |
| <b>MIR101-1</b>       | -0.05 | 7.89E-01 | 0.24  | 2.37E-01 |
| <b>PACRG-AS3</b>      | -0.17 | 3.89E-01 | -0.24 | 2.37E-01 |
| <b>PCDH8</b>          | -0.02 | 9.15E-01 | -0.24 | 2.37E-01 |
| <b>RGPD2</b>          | -0.09 | 6.52E-01 | -0.24 | 2.37E-01 |
| <b>RP11-147L13.12</b> | -0.27 | 1.62E-01 | -0.24 | 2.37E-01 |
| <b>RP11-384C4.7</b>   | -0.08 | 6.75E-01 | -0.24 | 2.37E-01 |
| <b>RP11-386J22.3</b>  | -0.17 | 3.85E-01 | -0.24 | 2.37E-01 |
| <b>RP3-328E19.4</b>   | -0.06 | 7.62E-01 | -0.24 | 2.37E-01 |
| <b>SLC29A3</b>        | 0.25  | 2.09E-01 | 0.24  | 2.37E-01 |
| <b>SMIM10</b>         | -0.27 | 1.68E-01 | -0.24 | 2.37E-01 |
| <b>TTC13</b>          | -0.07 | 7.18E-01 | -0.24 | 2.37E-01 |
| <b>WFDC1</b>          | 0.10  | 6.30E-01 | 0.24  | 2.37E-01 |
| <b>ZNF821</b>         | -0.06 | 7.77E-01 | 0.24  | 2.37E-01 |
| <b>AC007792.1</b>     | -0.20 | 3.01E-01 | -0.24 | 2.38E-01 |
| <b>AC096574.4</b>     | -0.11 | 5.78E-01 | -0.24 | 2.38E-01 |
| <b>AK8</b>            | 0.14  | 4.69E-01 | 0.24  | 2.38E-01 |
| <b>ATP6V0E1P1</b>     | 0.28  | 1.44E-01 | 0.24  | 2.38E-01 |
| <b>HERC2P5</b>        | 0.15  | 4.60E-01 | 0.24  | 2.38E-01 |
| <b>HLA-DOA</b>        | 0.24  | 2.13E-01 | 0.24  | 2.38E-01 |
| <b>LRR8D</b>          | 0.19  | 3.22E-01 | 0.24  | 2.38E-01 |
| <b>METTL21B</b>       | 0.16  | 4.11E-01 | 0.24  | 2.38E-01 |
| <b>MOSPD2</b>         | -0.07 | 7.06E-01 | -0.24 | 2.38E-01 |
| <b>NBPF14</b>         | -0.27 | 1.65E-01 | -0.24 | 2.38E-01 |
| <b>PLD6</b>           | -0.29 | 1.41E-01 | -0.24 | 2.38E-01 |
| <b>RASD1</b>          | 0.22  | 2.61E-01 | 0.24  | 2.38E-01 |
| <b>RGPD5</b>          | -0.40 | 3.31E-02 | 0.24  | 2.38E-01 |
| <b>RP11-255G12.3</b>  | 0.15  | 4.39E-01 | 0.24  | 2.38E-01 |
| <b>RP11-45M22.4</b>   | -0.13 | 5.04E-01 | -0.24 | 2.38E-01 |
| <b>RP11-489E7.4</b>   | -0.20 | 2.96E-01 | 0.24  | 2.38E-01 |
| <b>RUBCN</b>          | 0.24  | 2.20E-01 | 0.24  | 2.38E-01 |
| <b>SCOCP1</b>         | -0.17 | 4.01E-01 | 0.24  | 2.38E-01 |
| <b>SNTG1</b>          | -0.08 | 6.74E-01 | 0.24  | 2.38E-01 |
| <b>SV2A</b>           | -0.12 | 5.52E-01 | -0.24 | 2.38E-01 |
| <b>TAF13P2</b>        | 0.09  | 6.61E-01 | -0.24 | 2.38E-01 |
| <b>TULP1</b>          | -0.16 | 4.09E-01 | -0.24 | 2.38E-01 |
| <b>ZBTB6</b>          | -0.08 | 6.73E-01 | -0.24 | 2.38E-01 |
| <b>AHI1</b>           | -0.16 | 4.19E-01 | -0.23 | 2.38E-01 |

|                      |       |          |       |          |
|----------------------|-------|----------|-------|----------|
| <b>ANKRD20A3</b>     | -0.08 | 6.99E-01 | -0.23 | 2.38E-01 |
| <b>CTC-412M14.5</b>  | 0.10  | 6.16E-01 | -0.23 | 2.38E-01 |
| <b>FAM92A1</b>       | -0.05 | 7.86E-01 | -0.23 | 2.38E-01 |
| <b>G826</b>          | 0.04  | 8.57E-01 | 0.23  | 2.38E-01 |
| <b>LMOD1</b>         | 0.06  | 7.52E-01 | 0.23  | 2.38E-01 |
| <b>MYL9</b>          | 0.04  | 8.52E-01 | 0.23  | 2.38E-01 |
| <b>NDUF4F4P4</b>     | -0.05 | 7.84E-01 | -0.23 | 2.38E-01 |
| <b>NEFH</b>          | -0.06 | 7.54E-01 | -0.23 | 2.38E-01 |
| <b>OIP5-AS1</b>      | -0.04 | 8.50E-01 | 0.23  | 2.38E-01 |
| <b>PTMA</b>          | 0.02  | 9.10E-01 | -0.23 | 2.38E-01 |
| <b>RABL2A</b>        | -0.08 | 6.76E-01 | -0.23 | 2.38E-01 |
| <b>RNA5S9</b>        | 0.22  | 2.54E-01 | 0.23  | 2.38E-01 |
| <b>RP11-71L14.4</b>  | 0.46  | 1.37E-02 | -0.23 | 2.38E-01 |
| <b>RP11-893F2.14</b> | -0.14 | 4.73E-01 | -0.23 | 2.38E-01 |
| <b>SLC37A1</b>       | 0.03  | 8.65E-01 | -0.23 | 2.38E-01 |
| <b>STX5</b>          | 0.11  | 5.92E-01 | 0.23  | 2.38E-01 |
| <b>USP35</b>         | -0.08 | 7.01E-01 | 0.23  | 2.38E-01 |
| <b>UVRAG</b>         | -0.10 | 6.14E-01 | -0.23 | 2.38E-01 |
| <b>AP2A1</b>         | 0.17  | 3.82E-01 | 0.23  | 2.39E-01 |
| <b>CALD1</b>         | 0.12  | 5.41E-01 | -0.23 | 2.39E-01 |
| <b>CATSPERB</b>      | 0.29  | 1.33E-01 | 0.23  | 2.39E-01 |
| <b>DLAT</b>          | 0.00  | 9.96E-01 | -0.23 | 2.39E-01 |
| <b>DNAJC13</b>       | -0.18 | 3.70E-01 | -0.23 | 2.39E-01 |
| <b>DSG3</b>          | 0.15  | 4.38E-01 | 0.23  | 2.39E-01 |
| <b>EYA4</b>          | -0.06 | 7.57E-01 | 0.23  | 2.39E-01 |
| <b>FAM78A</b>        | 0.35  | 6.41E-02 | 0.23  | 2.39E-01 |
| <b>LYPD1</b>         | 0.22  | 2.70E-01 | 0.23  | 2.39E-01 |
| <b>MSTN</b>          | 0.33  | 8.78E-02 | 0.23  | 2.39E-01 |
| <b>MT-CO3</b>        | 0.25  | 2.02E-01 | 0.23  | 2.39E-01 |
| <b>MYSM1</b>         | -0.04 | 8.57E-01 | -0.23 | 2.39E-01 |
| <b>NSG1</b>          | 0.26  | 1.82E-01 | 0.23  | 2.39E-01 |
| <b>PDE7B</b>         | 0.05  | 8.15E-01 | 0.23  | 2.39E-01 |
| <b>RNU1-4</b>        | -0.19 | 3.34E-01 | 0.23  | 2.39E-01 |
| <b>RP11-119D9.1</b>  | -0.18 | 3.51E-01 | -0.23 | 2.39E-01 |
| <b>RP11-278J6.5</b>  | -0.06 | 7.61E-01 | -0.23 | 2.39E-01 |
| <b>C1QL4</b>         | -0.05 | 8.17E-01 | -0.23 | 2.40E-01 |
| <b>COMMD9</b>        | 0.10  | 6.07E-01 | 0.23  | 2.40E-01 |
| <b>COX5BP6</b>       | -0.38 | 4.87E-02 | -0.23 | 2.40E-01 |
| <b>CTC-296K1.3</b>   | 0.35  | 6.41E-02 | 0.23  | 2.40E-01 |
| <b>G41428</b>        | -0.31 | 1.11E-01 | -0.23 | 2.40E-01 |
| <b>IGKV3-11</b>      | 0.40  | 3.56E-02 | 0.23  | 2.40E-01 |
| <b>N4BP2</b>         | 0.15  | 4.36E-01 | -0.23 | 2.40E-01 |
| <b>PHBP16</b>        | 0.12  | 5.28E-01 | 0.23  | 2.40E-01 |
| <b>PHF2P2</b>        | -0.15 | 4.44E-01 | -0.23 | 2.40E-01 |
| <b>RP11-459F6.3</b>  | -0.33 | 8.87E-02 | -0.23 | 2.40E-01 |
| <b>RP3-337O18.9</b>  | -0.40 | 3.40E-02 | -0.23 | 2.40E-01 |
| <b>SCGB3A2</b>       | -0.04 | 8.53E-01 | -0.23 | 2.40E-01 |

|               |       |          |       |          |
|---------------|-------|----------|-------|----------|
| SLC35D2       | -0.02 | 9.06E-01 | 0.23  | 2.40E-01 |
| SNORD94       | 0.17  | 3.76E-01 | 0.23  | 2.40E-01 |
| STEAP1B       | 0.30  | 1.17E-01 | 0.23  | 2.40E-01 |
| TLN2          | -0.10 | 6.27E-01 | -0.23 | 2.40E-01 |
| ABCD3         | 0.22  | 2.65E-01 | -0.23 | 2.40E-01 |
| ANKRD46       | 0.06  | 7.66E-01 | -0.23 | 2.40E-01 |
| AOX3P         | 0.12  | 5.43E-01 | -0.23 | 2.40E-01 |
| HPS5          | 0.33  | 9.07E-02 | 0.23  | 2.40E-01 |
| MIR548Q       | 0.13  | 5.26E-01 | -0.23 | 2.40E-01 |
| NCKAP5        | -0.14 | 4.70E-01 | 0.23  | 2.40E-01 |
| RNU4-47P      | 0.27  | 1.67E-01 | -0.23 | 2.40E-01 |
| RNU6-1048P    | -0.14 | 4.71E-01 | -0.23 | 2.40E-01 |
| RP11-514P8.2  | -0.25 | 1.97E-01 | -0.23 | 2.40E-01 |
| RP11-55K13.1  | -0.15 | 4.39E-01 | -0.23 | 2.40E-01 |
| RP11-635N19.3 | -0.12 | 5.34E-01 | -0.23 | 2.40E-01 |
| SEL1L2        | -0.14 | 4.73E-01 | 0.23  | 2.40E-01 |
| SFMBT2        | 0.19  | 3.44E-01 | 0.23  | 2.40E-01 |
| SLC46A3       | 0.22  | 2.58E-01 | -0.23 | 2.40E-01 |
| SUGP1         | 0.09  | 6.62E-01 | 0.23  | 2.40E-01 |
| TREML2        | 0.10  | 6.26E-01 | 0.23  | 2.40E-01 |
| ZNF226        | -0.04 | 8.27E-01 | -0.23 | 2.40E-01 |
| AC083875.2    | 0.26  | 1.88E-01 | -0.23 | 2.41E-01 |
| ARHGAP24      | -0.30 | 1.22E-01 | -0.23 | 2.41E-01 |
| ARMC4P1       | -0.29 | 1.34E-01 | -0.23 | 2.41E-01 |
| IRF2BP2       | -0.27 | 1.63E-01 | -0.23 | 2.41E-01 |
| L3MBTL3       | -0.12 | 5.27E-01 | -0.23 | 2.41E-01 |
| LRFN5         | -0.32 | 1.00E-01 | -0.23 | 2.41E-01 |
| MMS22L        | -0.01 | 9.69E-01 | -0.23 | 2.41E-01 |
| N4BP2L2       | -0.37 | 5.54E-02 | -0.23 | 2.41E-01 |
| PLEKHH1       | -0.01 | 9.50E-01 | -0.23 | 2.41E-01 |
| RP11-16C1.2   | 0.14  | 4.80E-01 | -0.23 | 2.41E-01 |
| RP5-973N23.4  | -0.14 | 4.88E-01 | -0.23 | 2.41E-01 |
| TMX4          | 0.16  | 4.15E-01 | -0.23 | 2.41E-01 |
| VTI1BP2       | -0.15 | 4.45E-01 | -0.23 | 2.41E-01 |
| ZNF826P       | 0.22  | 2.51E-01 | -0.23 | 2.41E-01 |
| ARID3A        | 0.05  | 8.09E-01 | 0.23  | 2.41E-01 |
| BTN3A1        | 0.12  | 5.44E-01 | 0.23  | 2.41E-01 |
| FLJ27354      | -0.06 | 7.59E-01 | 0.23  | 2.41E-01 |
| GJB1          | 0.06  | 7.60E-01 | 0.23  | 2.41E-01 |
| NECAB3        | 0.21  | 2.77E-01 | 0.23  | 2.41E-01 |
| AC009303.2    | -0.14 | 4.77E-01 | 0.23  | 2.41E-01 |
| BAMBI         | -0.20 | 3.01E-01 | 0.23  | 2.41E-01 |
| DEGS2         | 0.21  | 2.82E-01 | 0.23  | 2.41E-01 |
| RN7SL5P       | 0.10  | 6.16E-01 | 0.23  | 2.41E-01 |
| ZC3H7B        | 0.26  | 1.81E-01 | 0.23  | 2.41E-01 |
| AC007787.3    | -0.23 | 2.30E-01 | -0.23 | 2.41E-01 |
| CYP4F29P      | -0.15 | 4.31E-01 | -0.23 | 2.41E-01 |



|                |       |          |       |          |
|----------------|-------|----------|-------|----------|
| G29699         | -0.14 | 4.84E-01 | -0.23 | 2.41E-01 |
| G3769          | 0.01  | 9.65E-01 | -0.23 | 2.41E-01 |
| MIR4668        | 0.06  | 7.60E-01 | -0.23 | 2.41E-01 |
| NPIP84         | -0.33 | 9.07E-02 | -0.23 | 2.41E-01 |
| OTUD1          | -0.24 | 2.21E-01 | -0.23 | 2.41E-01 |
| PAIP1          | 0.12  | 5.35E-01 | -0.23 | 2.41E-01 |
| RP11-1099M24.6 | 0.00  | 9.93E-01 | -0.23 | 2.41E-01 |
| RP11-379F4.4   | -0.01 | 9.76E-01 | -0.23 | 2.41E-01 |
| TAS2R10        | 0.11  | 5.76E-01 | -0.23 | 2.41E-01 |
| TCEAL4         | -0.07 | 7.11E-01 | -0.23 | 2.41E-01 |
| UBE2W          | 0.11  | 5.78E-01 | -0.23 | 2.41E-01 |
| ZXDC           | -0.10 | 6.21E-01 | -0.23 | 2.41E-01 |
| BAALC-AS1      | 0.30  | 1.26E-01 | 0.23  | 2.42E-01 |
| CDY4P          | 0.24  | 2.18E-01 | 0.23  | 2.42E-01 |
| KY             | 0.23  | 2.41E-01 | 0.23  | 2.42E-01 |
| MKRN1          | -0.08 | 6.88E-01 | 0.23  | 2.42E-01 |
| RP3-355L5.4    | 0.05  | 8.01E-01 | 0.23  | 2.42E-01 |
| RPPH1          | 0.12  | 5.39E-01 | 0.23  | 2.42E-01 |
| SIGLEC14       | -0.25 | 1.99E-01 | 0.23  | 2.42E-01 |
| SLC2A9         | 0.30  | 1.25E-01 | 0.23  | 2.42E-01 |
| SLC39A6        | 0.44  | 1.84E-02 | 0.23  | 2.42E-01 |
| ARR3           | 0.03  | 8.88E-01 | -0.23 | 2.42E-01 |
| CTB-147C22.3   | -0.24 | 2.20E-01 | -0.23 | 2.42E-01 |
| CTB-152G17.5   | 0.09  | 6.67E-01 | -0.23 | 2.42E-01 |
| CTD-2280E9.1   | -0.03 | 8.87E-01 | -0.23 | 2.42E-01 |
| FAM63B         | 0.13  | 5.21E-01 | -0.23 | 2.42E-01 |
| HERPUD1        | -0.43 | 2.32E-02 | -0.23 | 2.42E-01 |
| LIN9           | -0.14 | 4.81E-01 | -0.23 | 2.42E-01 |
| MIR107         | 0.02  | 9.28E-01 | -0.23 | 2.42E-01 |
| MIR30E         | 0.16  | 4.30E-01 | -0.23 | 2.42E-01 |
| MIR567         | 0.02  | 9.18E-01 | -0.23 | 2.42E-01 |
| RP11-332L8.1   | 0.05  | 8.13E-01 | -0.23 | 2.42E-01 |
| RP11-622C24.2  | -0.12 | 5.46E-01 | -0.23 | 2.42E-01 |
| SRSF12         | 0.26  | 1.78E-01 | -0.23 | 2.42E-01 |
| XLOC_010305    | 0.19  | 3.41E-01 | -0.23 | 2.42E-01 |
| ZNF157         | 0.37  | 5.03E-02 | -0.23 | 2.42E-01 |
| ZNF606         | 0.05  | 8.05E-01 | -0.23 | 2.42E-01 |
| ZNF648         | -0.17 | 3.85E-01 | -0.23 | 2.42E-01 |
| AC012501.2     | -0.17 | 3.92E-01 | -0.23 | 2.43E-01 |
| C1orf127       | 0.11  | 5.62E-01 | 0.23  | 2.43E-01 |
| C5AR1          | 0.04  | 8.22E-01 | 0.23  | 2.43E-01 |
| CDHR4          | -0.43 | 2.11E-02 | -0.23 | 2.43E-01 |
| COLQ           | -0.22 | 2.68E-01 | 0.23  | 2.43E-01 |
| DDO            | 0.20  | 3.15E-01 | -0.23 | 2.43E-01 |
| IKZF2          | 0.05  | 7.87E-01 | -0.23 | 2.43E-01 |
| LYST           | -0.12 | 5.42E-01 | -0.23 | 2.43E-01 |
| MIR3178        | -0.35 | 6.82E-02 | 0.23  | 2.43E-01 |

|                 |       |          |       |          |
|-----------------|-------|----------|-------|----------|
| MTND1P32        | -0.28 | 1.48E-01 | -0.23 | 2.43E-01 |
| POLM            | 0.03  | 8.80E-01 | 0.23  | 2.43E-01 |
| RP11-275F13.3   | -0.29 | 1.29E-01 | -0.23 | 2.43E-01 |
| RP11-379P15.1   | -0.21 | 2.75E-01 | -0.23 | 2.43E-01 |
| RP11-436K8.1    | 0.15  | 4.60E-01 | 0.23  | 2.43E-01 |
| SBF2            | -0.05 | 8.16E-01 | -0.23 | 2.43E-01 |
| ZNF546          | 0.18  | 3.72E-01 | 0.23  | 2.43E-01 |
| ZNF595          | -0.13 | 5.05E-01 | -0.23 | 2.43E-01 |
| AC009948.5      | 0.00  | 9.87E-01 | 0.23  | 2.43E-01 |
| ACA59           | 0.08  | 6.72E-01 | 0.23  | 2.43E-01 |
| BHLHA15         | 0.35  | 6.64E-02 | -0.23 | 2.43E-01 |
| C1orf112        | 0.02  | 9.05E-01 | -0.23 | 2.43E-01 |
| CTD-2583P5.3    | -0.07 | 7.09E-01 | -0.23 | 2.43E-01 |
| FAM21EP         | -0.10 | 6.05E-01 | -0.23 | 2.43E-01 |
| MASP1           | -0.14 | 4.66E-01 | 0.23  | 2.43E-01 |
| MIR3684         | 0.05  | 8.18E-01 | -0.23 | 2.43E-01 |
| MRC1L1          | -0.08 | 6.79E-01 | 0.23  | 2.43E-01 |
| MROH3P          | 0.13  | 4.94E-01 | -0.23 | 2.43E-01 |
| OR5P3           | -0.02 | 9.05E-01 | -0.23 | 2.43E-01 |
| P2RX4           | 0.15  | 4.60E-01 | 0.23  | 2.43E-01 |
| RAD51B          | 0.09  | 6.46E-01 | -0.23 | 2.43E-01 |
| RP11-568K15.1   | 0.00  | 9.90E-01 | -0.23 | 2.43E-01 |
| SCARNA4         | 0.09  | 6.42E-01 | 0.23  | 2.43E-01 |
| AC012485.1      | -0.32 | 9.18E-02 | -0.23 | 2.44E-01 |
| ACTA2           | 0.05  | 8.08E-01 | 0.23  | 2.44E-01 |
| AGGF1           | 0.03  | 8.83E-01 | 0.23  | 2.44E-01 |
| BLOC1S3         | 0.02  | 9.10E-01 | 0.23  | 2.44E-01 |
| CAMSAP3         | -0.24 | 2.11E-01 | -0.23 | 2.44E-01 |
| CHD5            | 0.16  | 4.16E-01 | 0.23  | 2.44E-01 |
| COL26A1         | -0.13 | 5.16E-01 | -0.23 | 2.44E-01 |
| CTD-2562G15.3   | 0.05  | 8.09E-01 | 0.23  | 2.44E-01 |
| CTD-3001H11.2   | 0.05  | 8.13E-01 | -0.23 | 2.44E-01 |
| CXCR2P1         | 0.23  | 2.41E-01 | 0.23  | 2.44E-01 |
| HECW2           | -0.01 | 9.67E-01 | 0.23  | 2.44E-01 |
| KLF15           | -0.20 | 3.00E-01 | -0.23 | 2.44E-01 |
| KSR1            | 0.17  | 3.82E-01 | 0.23  | 2.44E-01 |
| LA16c-312E8.2   | -0.17 | 3.73E-01 | -0.23 | 2.44E-01 |
| LA16c-313D11.12 | 0.14  | 4.81E-01 | 0.23  | 2.44E-01 |
| LYPD6           | -0.33 | 8.84E-02 | -0.23 | 2.44E-01 |
| PAPD4           | 0.20  | 3.04E-01 | -0.23 | 2.44E-01 |
| PRAME           | 0.00  | 9.91E-01 | 0.23  | 2.44E-01 |
| RN7SL1          | 0.08  | 6.94E-01 | 0.23  | 2.44E-01 |
| RP11-20I20.2    | -0.04 | 8.42E-01 | -0.23 | 2.44E-01 |
| SHMT1           | 0.13  | 5.24E-01 | 0.23  | 2.44E-01 |
| SNORD116-16     | 0.26  | 1.88E-01 | -0.23 | 2.44E-01 |
| UNC13C          | -0.07 | 7.29E-01 | -0.23 | 2.44E-01 |
| AC006946.15     | 0.18  | 3.60E-01 | 0.23  | 2.45E-01 |

|               |       |          |       |          |
|---------------|-------|----------|-------|----------|
| AC116533.1    | 0.12  | 5.45E-01 | -0.23 | 2.45E-01 |
| ANAPC1P1      | -0.22 | 2.51E-01 | 0.23  | 2.45E-01 |
| BSN           | -0.03 | 8.80E-01 | -0.23 | 2.45E-01 |
| C11orf52      | 0.10  | 5.98E-01 | -0.23 | 2.45E-01 |
| CCDC14        | -0.18 | 3.54E-01 | -0.23 | 2.45E-01 |
| CCL1          | -0.24 | 2.13E-01 | 0.23  | 2.45E-01 |
| CTD-2246P4.1  | -0.47 | 1.25E-02 | 0.23  | 2.45E-01 |
| CYCSP38       | -0.33 | 8.81E-02 | -0.23 | 2.45E-01 |
| G5482         | -0.20 | 3.17E-01 | 0.23  | 2.45E-01 |
| G554          | 0.01  | 9.67E-01 | 0.23  | 2.45E-01 |
| IRX2          | -0.11 | 5.73E-01 | 0.23  | 2.45E-01 |
| MAP1B         | 0.01  | 9.55E-01 | 0.23  | 2.45E-01 |
| MYT1          | 0.08  | 7.04E-01 | 0.23  | 2.45E-01 |
| PTPN20B       | 0.09  | 6.38E-01 | -0.23 | 2.45E-01 |
| RNU1-93P      | -0.24 | 2.17E-01 | -0.23 | 2.45E-01 |
| RNU6-1099P    | -0.33 | 9.04E-02 | -0.23 | 2.45E-01 |
| RP11-1000B6.2 | 0.17  | 3.84E-01 | -0.23 | 2.45E-01 |
| TFAP2C        | 0.21  | 2.79E-01 | -0.23 | 2.45E-01 |
| TRAC          | 0.18  | 3.67E-01 | 0.23  | 2.45E-01 |
| XLOC_013866   | -0.11 | 5.83E-01 | -0.23 | 2.45E-01 |
| XLOC_014405   | -0.01 | 9.63E-01 | -0.23 | 2.45E-01 |
| ACSM1         | 0.16  | 4.09E-01 | 0.23  | 2.45E-01 |
| AGPAT3        | 0.28  | 1.46E-01 | -0.23 | 2.45E-01 |
| ARMC12        | 0.00  | 9.89E-01 | 0.23  | 2.45E-01 |
| CHMP2B        | 0.09  | 6.33E-01 | -0.23 | 2.45E-01 |
| COL4A1        | 0.08  | 6.73E-01 | 0.23  | 2.45E-01 |
| CTD-2666L21.2 | -0.07 | 7.30E-01 | -0.23 | 2.45E-01 |
| DYRK1B        | -0.15 | 4.36E-01 | 0.23  | 2.45E-01 |
| GGA1          | 0.19  | 3.28E-01 | 0.23  | 2.45E-01 |
| MDM1          | 0.00  | 9.80E-01 | -0.23 | 2.45E-01 |
| MSR1          | -0.03 | 8.64E-01 | 0.23  | 2.45E-01 |
| MUC20         | 0.09  | 6.52E-01 | -0.23 | 2.45E-01 |
| PACSIN3       | 0.08  | 6.91E-01 | 0.23  | 2.45E-01 |
| PIM1          | 0.01  | 9.77E-01 | 0.23  | 2.45E-01 |
| PRPF40A       | 0.19  | 3.24E-01 | -0.23 | 2.45E-01 |
| RP11-93H24.3  | 0.00  | 9.92E-01 | -0.23 | 2.45E-01 |
| SNORA76       | -0.01 | 9.50E-01 | 0.23  | 2.45E-01 |
| SRP54-AS1     | -0.01 | 9.46E-01 | 0.23  | 2.45E-01 |
| AC006272.2    | -0.17 | 3.75E-01 | 0.23  | 2.46E-01 |
| CBLN2         | 0.23  | 2.44E-01 | -0.23 | 2.46E-01 |
| CTD-3074O7.5  | 0.21  | 2.89E-01 | 0.23  | 2.46E-01 |
| EPB41L2       | -0.35 | 6.89E-02 | -0.23 | 2.46E-01 |
| FAM184A       | -0.38 | 4.46E-02 | -0.23 | 2.46E-01 |
| FAM78B        | -0.05 | 8.05E-01 | 0.23  | 2.46E-01 |
| FLT3LG        | -0.06 | 7.50E-01 | 0.23  | 2.46E-01 |
| G25045        | 0.06  | 7.78E-01 | 0.23  | 2.46E-01 |
| G8260         | 0.13  | 4.97E-01 | 0.23  | 2.46E-01 |

|                 |       |          |       |          |
|-----------------|-------|----------|-------|----------|
| LMO7-AS1        | -0.01 | 9.59E-01 | -0.23 | 2.46E-01 |
| PLAC9           | -0.15 | 4.54E-01 | -0.23 | 2.46E-01 |
| PLEKHG4B        | 0.19  | 3.25E-01 | 0.23  | 2.46E-01 |
| PLSCR1          | 0.34  | 7.95E-02 | 0.23  | 2.46E-01 |
| RP11-111M22.4   | -0.02 | 9.24E-01 | -0.23 | 2.46E-01 |
| RP11-1376P16.2  | -0.21 | 2.87E-01 | -0.23 | 2.46E-01 |
| RP11-324D17.1   | -0.15 | 4.38E-01 | -0.23 | 2.46E-01 |
| RP11-517C16.4   | -0.24 | 2.17E-01 | 0.23  | 2.46E-01 |
| SCAI            | -0.14 | 4.70E-01 | -0.23 | 2.46E-01 |
| TRNAU1AP        | 0.01  | 9.64E-01 | 0.23  | 2.46E-01 |
| XLOC_007506     | 0.12  | 5.56E-01 | -0.23 | 2.46E-01 |
| XLOC_008747     | -0.12 | 5.56E-01 | -0.23 | 2.46E-01 |
| ZFPM2-AS1       | 0.00  | 9.91E-01 | 0.23  | 2.46E-01 |
| ANOS2P          | 0.27  | 1.57E-01 | 0.23  | 2.47E-01 |
| BECN1           | 0.06  | 7.75E-01 | 0.23  | 2.47E-01 |
| CTB-32O4.2      | -0.12 | 5.42E-01 | -0.23 | 2.47E-01 |
| EID3            | 0.19  | 3.29E-01 | 0.23  | 2.47E-01 |
| HNRNPA1P4       | -0.25 | 1.93E-01 | -0.23 | 2.47E-01 |
| LEF1            | 0.00  | 9.85E-01 | -0.23 | 2.47E-01 |
| LINC00266-1     | -0.02 | 9.18E-01 | 0.23  | 2.47E-01 |
| MOGS            | 0.10  | 6.01E-01 | 0.23  | 2.47E-01 |
| NEIL2           | 0.13  | 4.97E-01 | 0.23  | 2.47E-01 |
| OTUD6B          | -0.03 | 8.71E-01 | -0.23 | 2.47E-01 |
| PCGF3           | 0.15  | 4.54E-01 | 0.23  | 2.47E-01 |
| PWAR6           | 0.05  | 7.87E-01 | -0.23 | 2.47E-01 |
| RNY4P8          | -0.20 | 3.06E-01 | -0.23 | 2.47E-01 |
| RP1-67K17.4     | 0.26  | 1.79E-01 | -0.23 | 2.47E-01 |
| RP11-1006G14.5  | 0.15  | 4.55E-01 | 0.23  | 2.47E-01 |
| RP11-497H16.2   | -0.09 | 6.53E-01 | 0.23  | 2.47E-01 |
| RP11-536K7.3    | 0.03  | 8.64E-01 | 0.23  | 2.47E-01 |
| SPRR2B          | 0.17  | 3.97E-01 | 0.23  | 2.47E-01 |
| THRA            | -0.04 | 8.44E-01 | -0.23 | 2.47E-01 |
| XXbac-B135H6.18 | 0.10  | 6.31E-01 | 0.23  | 2.47E-01 |
| ZNF416          | -0.15 | 4.39E-01 | -0.23 | 2.47E-01 |
| AF129075.5      | 0.06  | 7.50E-01 | -0.23 | 2.47E-01 |
| ARHGEF39        | -0.04 | 8.56E-01 | -0.23 | 2.47E-01 |
| CALML5          | 0.06  | 7.68E-01 | 0.23  | 2.47E-01 |
| CMC1            | -0.07 | 7.41E-01 | -0.23 | 2.47E-01 |
| EIF5            | 0.23  | 2.47E-01 | -0.23 | 2.47E-01 |
| HIST2H4B        | -0.14 | 4.89E-01 | 0.23  | 2.47E-01 |
| MTHFS           | -0.14 | 4.63E-01 | -0.23 | 2.47E-01 |
| RERG            | 0.25  | 2.06E-01 | 0.23  | 2.47E-01 |
| RNU6-479P       | -0.21 | 2.92E-01 | -0.23 | 2.47E-01 |
| RP11-168J18.6   | -0.06 | 7.68E-01 | -0.23 | 2.47E-01 |
| RP11-350J20.5   | -0.32 | 9.56E-02 | -0.23 | 2.47E-01 |
| TSPAN5          | 0.14  | 4.76E-01 | 0.23  | 2.47E-01 |
| TUBA3FP         | 0.16  | 4.24E-01 | -0.23 | 2.47E-01 |

|                |       |          |       |          |
|----------------|-------|----------|-------|----------|
| ZNF836         | -0.16 | 4.11E-01 | -0.23 | 2.47E-01 |
| PGAM1P11       | -0.02 | 9.01E-01 | 0.23  | 2.48E-01 |
| PPIAP31        | 0.30  | 1.21E-01 | 0.23  | 2.48E-01 |
| RP11-258F22.1  | -0.13 | 5.10E-01 | 0.23  | 2.48E-01 |
| RP11-68L18.1   | -0.03 | 8.63E-01 | 0.23  | 2.48E-01 |
| SPINK7         | -0.09 | 6.37E-01 | 0.23  | 2.48E-01 |
| PCCA           | 0.08  | 6.90E-01 | -0.23 | 2.48E-01 |
| RNY3P7         | -0.21 | 2.72E-01 | -0.23 | 2.48E-01 |
| RP1-197B17.4   | -0.07 | 7.27E-01 | -0.23 | 2.48E-01 |
| RP11-359B20.1  | 0.33  | 8.51E-02 | -0.23 | 2.48E-01 |
| RP5-855D21.2   | -0.08 | 6.75E-01 | -0.23 | 2.48E-01 |
| AC006262.10    | 0.04  | 8.56E-01 | -0.23 | 2.48E-01 |
| AL049647.1     | -0.12 | 5.33E-01 | -0.23 | 2.48E-01 |
| HCRTR1         | -0.04 | 8.44E-01 | -0.23 | 2.48E-01 |
| MIR5693        | -0.17 | 4.00E-01 | -0.23 | 2.48E-01 |
| RP11-336K24.12 | -0.24 | 2.16E-01 | -0.23 | 2.48E-01 |
| RP11-424M24.3  | 0.25  | 2.07E-01 | -0.23 | 2.48E-01 |
| RP11-479O9.3   | -0.31 | 1.08E-01 | -0.23 | 2.48E-01 |
| RP5-1085F17.4  | 0.21  | 2.86E-01 | -0.23 | 2.48E-01 |
| SECISBP2       | -0.20 | 3.04E-01 | -0.23 | 2.48E-01 |
| USP32P1        | -0.13 | 5.06E-01 | -0.23 | 2.48E-01 |
| ADAMTS2        | -0.14 | 4.86E-01 | 0.23  | 2.48E-01 |
| C2orf44        | 0.44  | 1.97E-02 | 0.23  | 2.48E-01 |
| EHD3           | 0.01  | 9.43E-01 | 0.23  | 2.48E-01 |
| RNY5           | 0.10  | 6.19E-01 | 0.23  | 2.48E-01 |
| RP11-370F5.4   | -0.29 | 1.41E-01 | 0.23  | 2.48E-01 |
| SNORA60        | 0.00  | 9.86E-01 | 0.23  | 2.48E-01 |
| SNORD11B       | -0.19 | 3.21E-01 | 0.23  | 2.48E-01 |
| AK4P3          | -0.15 | 4.31E-01 | 0.23  | 2.49E-01 |
| DFFBP1         | -0.36 | 5.92E-02 | 0.23  | 2.49E-01 |
| G39123         | 0.00  | 9.97E-01 | -0.23 | 2.49E-01 |
| LL22NC03-2H8.5 | -0.07 | 7.37E-01 | -0.23 | 2.49E-01 |
| MIIP           | -0.05 | 7.95E-01 | 0.23  | 2.49E-01 |
| PLIN4          | 0.05  | 8.08E-01 | -0.23 | 2.49E-01 |
| RBM26          | -0.03 | 8.68E-01 | -0.23 | 2.49E-01 |
| RHOT1P3        | -0.02 | 9.36E-01 | 0.23  | 2.49E-01 |
| RP1-266L20.9   | -0.11 | 5.79E-01 | -0.23 | 2.49E-01 |
| RP1-30M3.5     | -0.02 | 9.39E-01 | -0.23 | 2.49E-01 |
| RP11-121L10.2  | -0.01 | 9.51E-01 | -0.23 | 2.49E-01 |
| RP11-380M21.1  | -0.22 | 2.70E-01 | -0.23 | 2.49E-01 |
| RP11-401P9.5   | 0.19  | 3.32E-01 | 0.23  | 2.49E-01 |
| RP11-43F13.1   | 0.25  | 2.08E-01 | 0.23  | 2.49E-01 |
| RP11-497D6.5   | 0.00  | 9.96E-01 | -0.23 | 2.49E-01 |
| RP11-504P24.5  | -0.12 | 5.59E-01 | -0.23 | 2.49E-01 |
| RP3-414A15.11  | -0.54 | 2.78E-03 | 0.23  | 2.49E-01 |
| RP4-796I17.5   | -0.25 | 1.96E-01 | -0.23 | 2.49E-01 |
| RPL35P5        | 0.14  | 4.66E-01 | 0.23  | 2.49E-01 |

|               |       |          |       |          |
|---------------|-------|----------|-------|----------|
| SNORA79       | 0.22  | 2.62E-01 | 0.23  | 2.49E-01 |
| THADA         | -0.07 | 7.28E-01 | -0.23 | 2.49E-01 |
| TMEM141       | -0.02 | 9.01E-01 | 0.23  | 2.49E-01 |
| ADGRE2        | -0.06 | 7.57E-01 | 0.23  | 2.50E-01 |
| CHRNA5        | -0.27 | 1.60E-01 | 0.23  | 2.50E-01 |
| PDPN          | 0.41  | 2.95E-02 | 0.23  | 2.50E-01 |
| RP11-506B6.6  | -0.10 | 6.04E-01 | 0.23  | 2.50E-01 |
| RPS3AP5       | -0.05 | 8.19E-01 | 0.23  | 2.50E-01 |
| SLC35E4       | 0.29  | 1.28E-01 | 0.23  | 2.50E-01 |
| TBC1D2B       | -0.04 | 8.39E-01 | 0.23  | 2.50E-01 |
| TRIM5         | 0.25  | 2.07E-01 | 0.23  | 2.50E-01 |
| AC007773.1    | -0.48 | 9.84E-03 | -0.23 | 2.50E-01 |
| AC016999.2    | -0.27 | 1.64E-01 | -0.23 | 2.50E-01 |
| EPB41L4A-AS1  | 0.21  | 2.94E-01 | -0.23 | 2.50E-01 |
| ILDR2         | 0.14  | 4.80E-01 | -0.23 | 2.50E-01 |
| RP11-177G23.2 | 0.04  | 8.37E-01 | -0.23 | 2.50E-01 |
| RP11-180O5.2  | -0.21 | 2.91E-01 | -0.23 | 2.50E-01 |
| CYP7B1        | 0.25  | 2.01E-01 | 0.23  | 2.50E-01 |
| DNAJC5        | 0.37  | 5.27E-02 | 0.23  | 2.50E-01 |
| EGOT          | -0.16 | 4.30E-01 | 0.23  | 2.50E-01 |
| FOXD2-AS1     | -0.08 | 6.75E-01 | 0.23  | 2.50E-01 |
| NFS1          | 0.18  | 3.59E-01 | 0.23  | 2.50E-01 |
| NOBOX         | 0.18  | 3.50E-01 | 0.23  | 2.50E-01 |
| OAZ3          | -0.25 | 2.01E-01 | 0.23  | 2.50E-01 |
| OGFOD3        | 0.24  | 2.15E-01 | 0.23  | 2.50E-01 |
| PROSER2       | 0.21  | 2.76E-01 | 0.23  | 2.50E-01 |
| RNU6-80P      | -0.46 | 1.41E-02 | 0.23  | 2.50E-01 |
| RP1-187B23.1  | -0.34 | 7.95E-02 | 0.23  | 2.50E-01 |
| RP11-20G13.1  | 0.06  | 7.67E-01 | 0.23  | 2.50E-01 |
| RP11-796E10.1 | 0.16  | 4.12E-01 | 0.23  | 2.50E-01 |
| RP5-821D11.7  | 0.04  | 8.40E-01 | 0.23  | 2.50E-01 |
| STARD10       | -0.01 | 9.70E-01 | 0.23  | 2.50E-01 |
| ANKRD13C      | 0.00  | 9.91E-01 | -0.23 | 2.50E-01 |
| CTC-471J1.2   | -0.27 | 1.59E-01 | -0.23 | 2.50E-01 |
| PCNP          | -0.03 | 8.63E-01 | -0.23 | 2.50E-01 |
| PTN           | -0.19 | 3.44E-01 | -0.23 | 2.50E-01 |
| RP11-383F6.1  | -0.13 | 5.13E-01 | -0.23 | 2.50E-01 |
| RP11-448G15.1 | 0.25  | 2.00E-01 | -0.23 | 2.50E-01 |
| RP11-71H17.1  | 0.11  | 5.84E-01 | -0.23 | 2.50E-01 |
| TMSB15A       | -0.22 | 2.54E-01 | -0.23 | 2.50E-01 |
| UBE2FP3       | -0.29 | 1.38E-01 | -0.23 | 2.50E-01 |
| AC010894.3    | 0.38  | 4.62E-02 | -0.23 | 2.51E-01 |
| AC092635.1    | -0.11 | 5.89E-01 | -0.23 | 2.51E-01 |
| BRIP1         | 0.07  | 7.11E-01 | -0.23 | 2.51E-01 |
| CAST          | -0.14 | 4.72E-01 | -0.23 | 2.51E-01 |
| DNAI1         | -0.18 | 3.69E-01 | 0.23  | 2.51E-01 |
| FLVCR1        | 0.02  | 9.13E-01 | -0.23 | 2.51E-01 |

|                       |       |          |       |          |
|-----------------------|-------|----------|-------|----------|
| <b>G8343</b>          | -0.30 | 1.24E-01 | -0.23 | 2.51E-01 |
| <b>LMX1B</b>          | -0.09 | 6.38E-01 | -0.23 | 2.51E-01 |
| <b>NADK</b>           | 0.23  | 2.35E-01 | 0.23  | 2.51E-01 |
| <b>PRAP1</b>          | -0.30 | 1.17E-01 | -0.23 | 2.51E-01 |
| <b>RGPD3</b>          | -0.02 | 9.04E-01 | 0.23  | 2.51E-01 |
| <b>RNMT</b>           | -0.04 | 8.26E-01 | -0.23 | 2.51E-01 |
| <b>RP11-45A17.4</b>   | -0.34 | 7.32E-02 | -0.23 | 2.51E-01 |
| <b>RP11-667K14.10</b> | -0.01 | 9.71E-01 | -0.23 | 2.51E-01 |
| <b>RP11-806L2.2</b>   | -0.27 | 1.65E-01 | -0.23 | 2.51E-01 |
| <b>SMPD4P1</b>        | 0.11  | 5.73E-01 | 0.23  | 2.51E-01 |
| <b>USP51</b>          | 0.08  | 6.92E-01 | -0.23 | 2.51E-01 |
| <b>ZNF770</b>         | 0.27  | 1.69E-01 | 0.23  | 2.51E-01 |
| <b>ARNTL</b>          | 0.10  | 6.01E-01 | 0.23  | 2.52E-01 |
| <b>GCNT1P3</b>        | 0.19  | 3.36E-01 | 0.23  | 2.52E-01 |
| <b>GTF2IP9</b>        | 0.17  | 3.92E-01 | 0.23  | 2.52E-01 |
| <b>LCE1A</b>          | 0.03  | 8.83E-01 | 0.23  | 2.52E-01 |
| <b>MIPEP</b>          | -0.19 | 3.41E-01 | 0.23  | 2.52E-01 |
| <b>MIR708</b>         | -0.19 | 3.32E-01 | 0.23  | 2.52E-01 |
| <b>NFASC</b>          | 0.20  | 2.98E-01 | 0.23  | 2.52E-01 |
| <b>PDDC1</b>          | 0.16  | 4.20E-01 | 0.23  | 2.52E-01 |
| <b>RN7SL806P</b>      | 0.17  | 3.87E-01 | 0.23  | 2.52E-01 |
| <b>RPSAP19</b>        | -0.21 | 2.95E-01 | 0.23  | 2.52E-01 |
| <b>SH2D4B</b>         | 0.02  | 9.37E-01 | 0.23  | 2.52E-01 |
| <b>TRPC4</b>          | 0.04  | 8.27E-01 | 0.23  | 2.52E-01 |
| <b>AC078842.4</b>     | 0.02  | 9.39E-01 | -0.23 | 2.52E-01 |
| <b>DCP1B</b>          | 0.35  | 6.84E-02 | -0.23 | 2.52E-01 |
| <b>G15537</b>         | -0.38 | 4.59E-02 | -0.23 | 2.52E-01 |
| <b>GRASP</b>          | -0.05 | 7.97E-01 | -0.23 | 2.52E-01 |
| <b>KB-1410C5.5</b>    | 0.10  | 6.31E-01 | -0.23 | 2.52E-01 |
| <b>MIR98</b>          | 0.02  | 9.33E-01 | -0.23 | 2.52E-01 |
| <b>RP11-739N20.2</b>  | -0.34 | 7.49E-02 | -0.23 | 2.52E-01 |
| <b>AP000962.2</b>     | -0.32 | 9.53E-02 | 0.23  | 2.52E-01 |
| <b>ASAH2</b>          | 0.09  | 6.54E-01 | -0.23 | 2.52E-01 |
| <b>ATP1B3</b>         | 0.24  | 2.16E-01 | 0.23  | 2.52E-01 |
| <b>C14orf37</b>       | -0.31 | 1.07E-01 | -0.23 | 2.52E-01 |
| <b>COCH</b>           | -0.04 | 8.28E-01 | -0.23 | 2.52E-01 |
| <b>ELMO1-AS1</b>      | 0.18  | 3.60E-01 | 0.23  | 2.52E-01 |
| <b>F13A1</b>          | -0.14 | 4.75E-01 | 0.23  | 2.52E-01 |
| <b>LRP11</b>          | -0.02 | 9.08E-01 | -0.23 | 2.52E-01 |
| <b>MARK3</b>          | 0.20  | 3.00E-01 | 0.23  | 2.52E-01 |
| <b>NDUFA11</b>        | 0.05  | 8.14E-01 | 0.23  | 2.52E-01 |
| <b>NUP93</b>          | -0.14 | 4.73E-01 | -0.23 | 2.52E-01 |
| <b>PGGT1B</b>         | 0.19  | 3.39E-01 | -0.23 | 2.52E-01 |
| <b>PPP1R1AP1</b>      | -0.25 | 2.06E-01 | -0.23 | 2.52E-01 |
| <b>RP11-1258F18.1</b> | 0.01  | 9.69E-01 | -0.23 | 2.52E-01 |
| <b>RP11-297N6.4</b>   | 0.03  | 8.63E-01 | 0.23  | 2.52E-01 |
| <b>RP11-38J22.6</b>   | -0.05 | 7.86E-01 | -0.23 | 2.52E-01 |

|                       |       |          |       |          |
|-----------------------|-------|----------|-------|----------|
| <b>RP11-577H5.1</b>   | -0.05 | 8.00E-01 | -0.23 | 2.52E-01 |
| <b>S1PR5</b>          | 0.03  | 8.91E-01 | 0.23  | 2.52E-01 |
| <b>SGK223</b>         | 0.07  | 7.21E-01 | 0.23  | 2.52E-01 |
| <b>SNCAIP</b>         | -0.35 | 6.59E-02 | -0.23 | 2.52E-01 |
| <b>TRIM63</b>         | -0.26 | 1.81E-01 | -0.23 | 2.52E-01 |
| <b>VCPIP1</b>         | -0.07 | 7.28E-01 | -0.23 | 2.52E-01 |
| <b>ATP5G1P4</b>       | -0.26 | 1.74E-01 | 0.23  | 2.53E-01 |
| <b>DCTN1</b>          | 0.08  | 6.94E-01 | 0.23  | 2.53E-01 |
| <b>FARP2</b>          | 0.01  | 9.56E-01 | 0.23  | 2.53E-01 |
| <b>NOS2</b>           | 0.32  | 1.01E-01 | -0.23 | 2.53E-01 |
| <b>RP11-134E15.1</b>  | 0.07  | 7.15E-01 | 0.23  | 2.53E-01 |
| <b>RP11-188D8.1</b>   | 0.27  | 1.57E-01 | -0.23 | 2.53E-01 |
| <b>RP11-475E11.2</b>  | 0.17  | 3.77E-01 | -0.23 | 2.53E-01 |
| <b>RP11-481A20.10</b> | -0.19 | 3.46E-01 | -0.23 | 2.53E-01 |
| <b>RP5-1086K13.1</b>  | 0.01  | 9.50E-01 | -0.23 | 2.53E-01 |
| <b>TRIM56</b>         | 0.04  | 8.48E-01 | 0.23  | 2.53E-01 |
| <b>ZNF736P9Y</b>      | 0.32  | 9.56E-02 | 0.23  | 2.53E-01 |
| <b>AC002401.1</b>     | 0.39  | 4.15E-02 | -0.23 | 2.54E-01 |
| <b>AC108448.2</b>     | -0.22 | 2.54E-01 | -0.23 | 2.54E-01 |
| <b>CYB561D2</b>       | 0.29  | 1.38E-01 | 0.23  | 2.54E-01 |
| <b>EIF1AX</b>         | -0.24 | 2.24E-01 | -0.23 | 2.54E-01 |
| <b>LDB3</b>           | 0.01  | 9.42E-01 | 0.23  | 2.54E-01 |
| <b>LINC00910</b>      | 0.04  | 8.45E-01 | 0.23  | 2.54E-01 |
| <b>PDCD1LG2</b>       | 0.22  | 2.65E-01 | 0.23  | 2.54E-01 |
| <b>PTPN22</b>         | 0.46  | 1.34E-02 | 0.23  | 2.54E-01 |
| <b>RP11-16L21.7</b>   | 0.08  | 6.83E-01 | 0.23  | 2.54E-01 |
| <b>RP11-262H14.4</b>  | -0.35 | 7.10E-02 | -0.23 | 2.54E-01 |
| <b>TINF2</b>          | -0.02 | 9.28E-01 | 0.23  | 2.54E-01 |
| <b>UBE2E1-AS1</b>     | 0.23  | 2.33E-01 | -0.23 | 2.54E-01 |
| <b>XLOC_012254</b>    | -0.34 | 7.82E-02 | 0.23  | 2.54E-01 |
| <b>ZNF816</b>         | -0.09 | 6.42E-01 | -0.23 | 2.54E-01 |
| <b>ZSCAN5D</b>        | -0.05 | 8.05E-01 | -0.23 | 2.54E-01 |
| <b>AC125232.1</b>     | 0.11  | 5.87E-01 | 0.23  | 2.54E-01 |
| <b>CCDC59</b>         | -0.06 | 7.55E-01 | -0.23 | 2.54E-01 |
| <b>CENPUP2</b>        | -0.11 | 5.88E-01 | -0.23 | 2.54E-01 |
| <b>CEP295</b>         | 0.03  | 8.97E-01 | -0.23 | 2.54E-01 |
| <b>CTD-2385L22.2</b>  | -0.12 | 5.49E-01 | -0.23 | 2.54E-01 |
| <b>G26269</b>         | -0.05 | 7.97E-01 | -0.23 | 2.54E-01 |
| <b>KRTAP9-2</b>       | -0.22 | 2.66E-01 | 0.23  | 2.54E-01 |
| <b>LIPH</b>           | 0.10  | 6.21E-01 | -0.23 | 2.54E-01 |
| <b>MRPS25</b>         | 0.19  | 3.22E-01 | 0.23  | 2.54E-01 |
| <b>PDZPH1P</b>        | 0.13  | 4.95E-01 | -0.23 | 2.54E-01 |
| <b>PGBD4</b>          | 0.34  | 8.05E-02 | -0.23 | 2.54E-01 |
| <b>RP11-122K13.12</b> | -0.23 | 2.38E-01 | -0.23 | 2.54E-01 |
| <b>RP11-538D16.2</b>  | -0.05 | 8.10E-01 | -0.23 | 2.54E-01 |
| <b>RP11-867G23.3</b>  | -0.04 | 8.37E-01 | -0.23 | 2.54E-01 |
| <b>SNORA19</b>        | -0.01 | 9.71E-01 | -0.23 | 2.54E-01 |



|               |       |          |       |          |
|---------------|-------|----------|-------|----------|
| TESK2         | 0.00  | 9.88E-01 | 0.23  | 2.54E-01 |
| WFIKKN1       | -0.02 | 9.03E-01 | -0.23 | 2.54E-01 |
| ZBTB21        | -0.01 | 9.79E-01 | -0.23 | 2.54E-01 |
| ZDHC23        | -0.16 | 4.04E-01 | -0.23 | 2.54E-01 |
| ZNF321P       | 0.23  | 2.32E-01 | -0.23 | 2.54E-01 |
| ZNF581        | 0.09  | 6.42E-01 | 0.23  | 2.54E-01 |
| ZNF76         | 0.33  | 8.75E-02 | 0.23  | 2.54E-01 |
| ABHD17B       | 0.22  | 2.71E-01 | 0.23  | 2.55E-01 |
| ACSM6         | -0.19 | 3.24E-01 | -0.23 | 2.55E-01 |
| CEACAM19      | 0.19  | 3.44E-01 | 0.23  | 2.55E-01 |
| CPT1C         | 0.01  | 9.47E-01 | 0.23  | 2.55E-01 |
| GATAD1        | 0.18  | 3.57E-01 | 0.23  | 2.55E-01 |
| GSAP          | -0.12 | 5.58E-01 | -0.23 | 2.55E-01 |
| IRAK3         | 0.24  | 2.16E-01 | 0.23  | 2.55E-01 |
| MIR548AT      | 0.08  | 6.74E-01 | -0.23 | 2.55E-01 |
| MIR554        | -0.15 | 4.44E-01 | -0.23 | 2.55E-01 |
| RBM20         | 0.04  | 8.21E-01 | -0.23 | 2.55E-01 |
| REXO4         | 0.28  | 1.55E-01 | 0.23  | 2.55E-01 |
| RN7SL862P     | 0.00  | 9.99E-01 | 0.23  | 2.55E-01 |
| RNU6-893P     | 0.28  | 1.51E-01 | -0.23 | 2.55E-01 |
| RP11-121E16.1 | -0.03 | 8.79E-01 | 0.23  | 2.55E-01 |
| RP11-123C21.2 | -0.19 | 3.29E-01 | 0.23  | 2.55E-01 |
| RP11-440I14.2 | 0.05  | 7.91E-01 | -0.23 | 2.55E-01 |
| RP5-1139B12.4 | 0.18  | 3.50E-01 | -0.23 | 2.55E-01 |
| RPL13AP25     | 0.02  | 9.32E-01 | 0.23  | 2.55E-01 |
| SLC29A2       | -0.02 | 9.33E-01 | 0.23  | 2.55E-01 |
| SNORA71A      | -0.06 | 7.43E-01 | 0.23  | 2.55E-01 |
| VAT1          | -0.02 | 9.06E-01 | 0.23  | 2.55E-01 |
| XLOC_010023   | 0.06  | 7.53E-01 | -0.23 | 2.55E-01 |
| AC007556.3    | -0.26 | 1.82E-01 | -0.23 | 2.56E-01 |
| AGGF1P2       | -0.01 | 9.74E-01 | 0.23  | 2.56E-01 |
| AL359091.2    | -0.41 | 2.91E-02 | 0.23  | 2.56E-01 |
| CCNT2-AS1     | -0.09 | 6.32E-01 | 0.23  | 2.56E-01 |
| CLMP          | -0.07 | 7.35E-01 | -0.23 | 2.56E-01 |
| CSNK1E        | -0.03 | 8.79E-01 | 0.23  | 2.56E-01 |
| EDDM3CP       | -0.23 | 2.42E-01 | -0.23 | 2.56E-01 |
| EPGN          | 0.32  | 9.18E-02 | 0.23  | 2.56E-01 |
| FALEC         | 0.17  | 3.94E-01 | -0.23 | 2.56E-01 |
| GJC1          | 0.19  | 3.36E-01 | 0.23  | 2.56E-01 |
| IRS4          | -0.49 | 8.88E-03 | -0.23 | 2.56E-01 |
| KNTC1         | -0.03 | 8.93E-01 | -0.23 | 2.56E-01 |
| NDUFB10       | 0.03  | 8.93E-01 | 0.23  | 2.56E-01 |
| RAB43         | -0.17 | 3.82E-01 | 0.23  | 2.56E-01 |
| RIC3          | -0.11 | 5.85E-01 | -0.23 | 2.56E-01 |
| RP11-90M2.5   | 0.03  | 8.85E-01 | 0.23  | 2.56E-01 |
| RPL23AP90     | -0.03 | 8.90E-01 | 0.23  | 2.56E-01 |
| TAB3          | 0.12  | 5.28E-01 | -0.23 | 2.56E-01 |

|                |       |          |       |          |
|----------------|-------|----------|-------|----------|
| TMEM104        | 0.16  | 4.20E-01 | 0.23  | 2.56E-01 |
| ZYG11B         | 0.03  | 8.86E-01 | -0.23 | 2.56E-01 |
| AC027612.4     | -0.37 | 5.29E-02 | -0.23 | 2.56E-01 |
| C1orf198       | -0.13 | 5.20E-01 | -0.23 | 2.56E-01 |
| CTD-2207P18.1  | -0.05 | 8.00E-01 | -0.23 | 2.56E-01 |
| HNRNPA1P37     | -0.20 | 3.02E-01 | -0.23 | 2.56E-01 |
| PROSER1        | -0.12 | 5.31E-01 | -0.23 | 2.56E-01 |
| RP11-350F16.2  | -0.04 | 8.51E-01 | -0.23 | 2.56E-01 |
| RP11-850A17.1  | -0.18 | 3.62E-01 | -0.23 | 2.56E-01 |
| XLOC_009864    | -0.08 | 6.70E-01 | -0.23 | 2.56E-01 |
| ATG13          | 0.08  | 6.79E-01 | 0.23  | 2.56E-01 |
| AURKA          | 0.25  | 1.91E-01 | 0.23  | 2.56E-01 |
| BCAP31         | 0.10  | 6.13E-01 | 0.23  | 2.56E-01 |
| DCAF11         | 0.02  | 9.33E-01 | 0.23  | 2.56E-01 |
| DOLPP1         | 0.05  | 8.11E-01 | 0.23  | 2.56E-01 |
| FABP5P2        | -0.11 | 5.77E-01 | 0.23  | 2.56E-01 |
| HS1BP3         | -0.14 | 4.79E-01 | 0.23  | 2.56E-01 |
| PSMC1P10       | 0.05  | 8.13E-01 | 0.23  | 2.56E-01 |
| RN7SL503P      | 0.03  | 8.92E-01 | 0.23  | 2.56E-01 |
| RP11-1035H13.2 | -0.21 | 2.87E-01 | 0.23  | 2.56E-01 |
| RP11-169E6.1   | -0.02 | 9.39E-01 | 0.23  | 2.56E-01 |
| RP11-268I9.1   | -0.07 | 7.14E-01 | 0.23  | 2.56E-01 |
| SLC26A9        | 0.27  | 1.68E-01 | 0.23  | 2.56E-01 |
| AC018712.2     | 0.33  | 8.24E-02 | -0.23 | 2.57E-01 |
| AKTIP          | -0.02 | 9.29E-01 | -0.23 | 2.57E-01 |
| CTC-459F4.9    | 0.16  | 4.02E-01 | 0.23  | 2.57E-01 |
| DNAJC3         | 0.04  | 8.38E-01 | -0.23 | 2.57E-01 |
| FAM205BP       | -0.17 | 3.93E-01 | 0.23  | 2.57E-01 |
| FAM72D         | -0.07 | 7.07E-01 | 0.23  | 2.57E-01 |
| FXYD3          | -0.01 | 9.79E-01 | 0.23  | 2.57E-01 |
| GM2A           | 0.42  | 2.80E-02 | 0.23  | 2.57E-01 |
| GUCD1          | 0.11  | 5.92E-01 | 0.23  | 2.57E-01 |
| IGHV3-15       | 0.32  | 9.42E-02 | 0.23  | 2.57E-01 |
| INTS9          | 0.15  | 4.60E-01 | 0.23  | 2.57E-01 |
| LINC01578      | -0.36 | 6.30E-02 | -0.23 | 2.57E-01 |
| MIR455         | -0.09 | 6.65E-01 | 0.23  | 2.57E-01 |
| MS4A6A         | -0.10 | 6.25E-01 | 0.23  | 2.57E-01 |
| NAALADL1       | -0.22 | 2.57E-01 | 0.23  | 2.57E-01 |
| PAK1           | 0.10  | 6.08E-01 | 0.23  | 2.57E-01 |
| PAX3           | -0.51 | 5.83E-03 | -0.23 | 2.57E-01 |
| RAB11FIP4      | -0.11 | 5.78E-01 | -0.23 | 2.57E-01 |
| RNF123         | -0.12 | 5.41E-01 | 0.23  | 2.57E-01 |
| RP11-298I3.6   | -0.03 | 8.64E-01 | -0.23 | 2.57E-01 |
| RP11-517H2.6   | -0.02 | 9.02E-01 | -0.23 | 2.57E-01 |
| SEC1P          | -0.03 | 8.86E-01 | 0.23  | 2.57E-01 |
| SPNS3          | -0.07 | 7.22E-01 | 0.23  | 2.57E-01 |
| TRAV19         | -0.12 | 5.39E-01 | 0.23  | 2.57E-01 |

|                       |       |          |       |          |
|-----------------------|-------|----------|-------|----------|
| <b>XLOC_002788</b>    | -0.19 | 3.45E-01 | -0.23 | 2.57E-01 |
| <b>ZW10</b>           | -0.08 | 6.75E-01 | -0.23 | 2.57E-01 |
| <b>AC010504.2</b>     | 0.09  | 6.67E-01 | -0.23 | 2.58E-01 |
| <b>AC098795.1</b>     | -0.04 | 8.52E-01 | -0.23 | 2.58E-01 |
| <b>ANXA11</b>         | -0.07 | 7.36E-01 | -0.23 | 2.58E-01 |
| <b>CTD-2007H13.1</b>  | -0.08 | 6.98E-01 | 0.23  | 2.58E-01 |
| <b>CTXN3</b>          | -0.05 | 8.03E-01 | 0.23  | 2.58E-01 |
| <b>DNM3OS</b>         | -0.28 | 1.56E-01 | -0.23 | 2.58E-01 |
| <b>DPPA2P1</b>        | 0.17  | 3.90E-01 | 0.23  | 2.58E-01 |
| <b>G42267</b>         | -0.22 | 2.57E-01 | 0.23  | 2.58E-01 |
| <b>IFT81</b>          | -0.24 | 2.20E-01 | -0.23 | 2.58E-01 |
| <b>LA16c-395F10.1</b> | 0.17  | 3.93E-01 | 0.23  | 2.58E-01 |
| <b>LINC00652</b>      | 0.05  | 8.09E-01 | -0.23 | 2.58E-01 |
| <b>NETO1</b>          | 0.16  | 4.17E-01 | -0.23 | 2.58E-01 |
| <b>PLEKHO1</b>        | 0.05  | 8.05E-01 | 0.23  | 2.58E-01 |
| <b>RP1-128O3.5</b>    | -0.17 | 3.81E-01 | 0.23  | 2.58E-01 |
| <b>RP11-297D21.4</b>  | 0.28  | 1.42E-01 | 0.23  | 2.58E-01 |
| <b>RP11-557J10.4</b>  | -0.15 | 4.56E-01 | -0.23 | 2.58E-01 |
| <b>RP11-582J16.4</b>  | -0.21 | 2.80E-01 | -0.23 | 2.58E-01 |
| <b>RP5-1065J22.4</b>  | -0.16 | 4.13E-01 | -0.23 | 2.58E-01 |
| <b>SMG1</b>           | -0.13 | 5.14E-01 | -0.23 | 2.58E-01 |
| <b>SMS</b>            | -0.03 | 8.74E-01 | -0.23 | 2.58E-01 |
| <b>SNRNP35</b>        | 0.03  | 8.71E-01 | 0.23  | 2.58E-01 |
| <b>ZMYND8</b>         | 0.07  | 7.25E-01 | 0.23  | 2.58E-01 |
| <b>ZNF280C</b>        | 0.28  | 1.46E-01 | -0.23 | 2.58E-01 |
| <b>CPSF4</b>          | 0.30  | 1.27E-01 | 0.23  | 2.58E-01 |
| <b>CSPG4P12</b>       | 0.13  | 5.16E-01 | 0.23  | 2.58E-01 |
| <b>GPR1-AS</b>        | 0.47  | 1.20E-02 | 0.23  | 2.58E-01 |
| <b>KBTBD11</b>        | 0.14  | 4.77E-01 | 0.23  | 2.58E-01 |
| <b>MAP3K14-AS1</b>    | -0.04 | 8.24E-01 | 0.23  | 2.58E-01 |
| <b>NEIL3</b>          | 0.14  | 4.87E-01 | 0.23  | 2.58E-01 |
| <b>NFKB2</b>          | -0.01 | 9.69E-01 | 0.23  | 2.58E-01 |
| <b>NNT-AS1</b>        | 0.11  | 5.80E-01 | 0.23  | 2.58E-01 |
| <b>PTK6</b>           | 0.23  | 2.33E-01 | 0.23  | 2.58E-01 |
| <b>RNU6-1301P</b>     | -0.22 | 2.54E-01 | 0.23  | 2.58E-01 |
| <b>RP11-692P14.1</b>  | -0.02 | 9.10E-01 | 0.23  | 2.58E-01 |
| <b>TRPV3</b>          | 0.21  | 2.86E-01 | 0.23  | 2.58E-01 |
| <b>Vault</b>          | -0.14 | 4.73E-01 | 0.23  | 2.58E-01 |
| <b>BLID</b>           | -0.23 | 2.37E-01 | -0.23 | 2.58E-01 |
| <b>G32307</b>         | -0.21 | 2.80E-01 | -0.23 | 2.58E-01 |
| <b>G35143</b>         | 0.16  | 4.08E-01 | -0.23 | 2.58E-01 |
| <b>HMGB3P22</b>       | -0.16 | 4.12E-01 | -0.23 | 2.58E-01 |
| <b>LL22NC03-2H8.4</b> | -0.05 | 7.88E-01 | -0.23 | 2.58E-01 |
| <b>PDLIM1P4</b>       | -0.46 | 1.36E-02 | -0.23 | 2.58E-01 |
| <b>RP11-326C3.16</b>  | 0.07  | 7.29E-01 | -0.23 | 2.58E-01 |
| <b>RYK</b>            | -0.08 | 7.01E-01 | -0.23 | 2.58E-01 |
| <b>SULT1C4</b>        | -0.24 | 2.19E-01 | -0.23 | 2.58E-01 |

|                      |       |          |       |          |
|----------------------|-------|----------|-------|----------|
| <b>ANXA13</b>        | 0.24  | 2.10E-01 | -0.23 | 2.59E-01 |
| <b>CCDC36</b>        | -0.08 | 6.94E-01 | -0.23 | 2.59E-01 |
| <b>CERS3</b>         | 0.39  | 3.77E-02 | 0.23  | 2.59E-01 |
| <b>CFAP74</b>        | 0.28  | 1.52E-01 | 0.23  | 2.59E-01 |
| <b>EVC</b>           | 0.08  | 6.89E-01 | 0.23  | 2.59E-01 |
| <b>FAM19A3</b>       | -0.30 | 1.16E-01 | -0.23 | 2.59E-01 |
| <b>G28030</b>        | -0.21 | 2.83E-01 | -0.23 | 2.59E-01 |
| <b>G43427</b>        | 0.16  | 4.24E-01 | 0.23  | 2.59E-01 |
| <b>GLYATL1P2</b>     | -0.11 | 5.71E-01 | 0.23  | 2.59E-01 |
| <b>INTU</b>          | 0.09  | 6.61E-01 | -0.23 | 2.59E-01 |
| <b>LDOC1</b>         | -0.20 | 2.96E-01 | -0.23 | 2.59E-01 |
| <b>MKRN9P</b>        | -0.01 | 9.67E-01 | -0.23 | 2.59E-01 |
| <b>PTGER4</b>        | 0.01  | 9.72E-01 | 0.23  | 2.59E-01 |
| <b>RP11-145M9.5</b>  | 0.04  | 8.40E-01 | -0.23 | 2.59E-01 |
| <b>RP11-178F10.1</b> | -0.12 | 5.55E-01 | -0.23 | 2.59E-01 |
| <b>RP11-324I22.4</b> | 0.23  | 2.37E-01 | 0.23  | 2.59E-01 |
| <b>RP11-449H3.1</b>  | 0.11  | 5.77E-01 | 0.23  | 2.59E-01 |
| <b>RP11-881M11.8</b> | -0.26 | 1.90E-01 | -0.23 | 2.59E-01 |
| <b>RP3-333A15.1</b>  | 0.16  | 4.08E-01 | -0.23 | 2.59E-01 |
| <b>SFXN1</b>         | 0.38  | 4.85E-02 | 0.23  | 2.59E-01 |
| <b>SLC39A5</b>       | -0.09 | 6.45E-01 | -0.23 | 2.59E-01 |
| <b>UBE2R2-AS1</b>    | 0.33  | 8.59E-02 | 0.23  | 2.59E-01 |
| <b>XLOC_000972</b>   | 0.13  | 5.16E-01 | -0.23 | 2.59E-01 |
| <b>ZNF596</b>        | 0.07  | 7.07E-01 | -0.23 | 2.59E-01 |
| <b>AC005592.2</b>    | -0.20 | 3.15E-01 | -0.22 | 2.60E-01 |
| <b>AC009014.3</b>    | 0.07  | 7.32E-01 | -0.22 | 2.60E-01 |
| <b>AC069394.1</b>    | 0.05  | 8.08E-01 | -0.22 | 2.60E-01 |
| <b>AC092171.4</b>    | 0.59  | 9.64E-04 | 0.22  | 2.60E-01 |
| <b>BCAS1</b>         | -0.30 | 1.24E-01 | -0.22 | 2.60E-01 |
| <b>C11orf74</b>      | 0.02  | 9.38E-01 | 0.22  | 2.60E-01 |
| <b>C3orf33</b>       | 0.29  | 1.41E-01 | -0.22 | 2.60E-01 |
| <b>GLRA4</b>         | -0.07 | 7.19E-01 | -0.22 | 2.60E-01 |
| <b>LRRC37A</b>       | 0.01  | 9.75E-01 | -0.22 | 2.60E-01 |
| <b>MRPL57P3</b>      | 0.15  | 4.48E-01 | 0.22  | 2.60E-01 |
| <b>RMND5B</b>        | -0.10 | 6.10E-01 | 0.22  | 2.60E-01 |
| <b>RN7SL166P</b>     | 0.13  | 5.00E-01 | 0.22  | 2.60E-01 |
| <b>RN7SL381P</b>     | -0.22 | 2.69E-01 | -0.22 | 2.60E-01 |
| <b>RNU6-1327P</b>    | 0.13  | 5.06E-01 | 0.22  | 2.60E-01 |
| <b>RP11-474P2.4</b>  | 0.01  | 9.43E-01 | -0.22 | 2.60E-01 |
| <b>RP4-555D20.1</b>  | -0.01 | 9.46E-01 | -0.22 | 2.60E-01 |
| <b>SLN</b>           | 0.09  | 6.49E-01 | -0.22 | 2.60E-01 |
| <b>AC025165.8</b>    | -0.30 | 1.17E-01 | -0.22 | 2.60E-01 |
| <b>AC097381.1</b>    | 0.19  | 3.24E-01 | 0.22  | 2.60E-01 |
| <b>CA2</b>           | -0.15 | 4.35E-01 | 0.22  | 2.60E-01 |
| <b>CADM2</b>         | -0.29 | 1.38E-01 | -0.22 | 2.60E-01 |
| <b>CASC3</b>         | -0.05 | 8.04E-01 | -0.22 | 2.60E-01 |
| <b>CDIP1</b>         | 0.33  | 8.73E-02 | 0.22  | 2.60E-01 |

|               |       |          |       |          |
|---------------|-------|----------|-------|----------|
| CLEC10A       | 0.08  | 7.04E-01 | 0.22  | 2.60E-01 |
| G20736        | 0.25  | 2.02E-01 | 0.22  | 2.60E-01 |
| GALNT14       | 0.00  | 9.81E-01 | 0.22  | 2.60E-01 |
| GVINP1        | 0.27  | 1.57E-01 | 0.22  | 2.60E-01 |
| KPNA7         | -0.09 | 6.52E-01 | 0.22  | 2.60E-01 |
| NRG4          | -0.09 | 6.54E-01 | -0.22 | 2.60E-01 |
| NSUN5P1       | -0.16 | 4.26E-01 | -0.22 | 2.60E-01 |
| PPARGC1B      | 0.15  | 4.44E-01 | 0.22  | 2.60E-01 |
| PRRG2         | 0.05  | 7.98E-01 | 0.22  | 2.60E-01 |
| RN7SL119P     | 0.05  | 8.04E-01 | 0.22  | 2.60E-01 |
| RN7SL173P     | 0.09  | 6.33E-01 | -0.22 | 2.60E-01 |
| RNF144A       | -0.10 | 6.01E-01 | -0.22 | 2.60E-01 |
| RP11-81H14.2  | 0.19  | 3.22E-01 | -0.22 | 2.60E-01 |
| RUFY4         | 0.01  | 9.48E-01 | 0.22  | 2.60E-01 |
| SON           | -0.04 | 8.22E-01 | -0.22 | 2.60E-01 |
| TATDN2        | 0.16  | 4.29E-01 | 0.22  | 2.60E-01 |
| AC008937.3    | -0.10 | 6.21E-01 | 0.22  | 2.61E-01 |
| AC013444.1    | 0.16  | 4.14E-01 | 0.22  | 2.61E-01 |
| AC018816.3    | 0.17  | 4.00E-01 | -0.22 | 2.61E-01 |
| AGTPBP1       | -0.01 | 9.58E-01 | -0.22 | 2.61E-01 |
| BNIP3P1       | -0.13 | 5.26E-01 | 0.22  | 2.61E-01 |
| CD151         | 0.06  | 7.64E-01 | 0.22  | 2.61E-01 |
| CTC-43909.1   | -0.22 | 2.52E-01 | 0.22  | 2.61E-01 |
| CTD-2530H12.8 | -0.03 | 8.94E-01 | -0.22 | 2.61E-01 |
| CTD-2562G15.2 | 0.06  | 7.65E-01 | -0.22 | 2.61E-01 |
| G27121        | -0.12 | 5.49E-01 | 0.22  | 2.61E-01 |
| GSTCD         | 0.06  | 7.70E-01 | -0.22 | 2.61E-01 |
| HSCB          | 0.12  | 5.29E-01 | 0.22  | 2.61E-01 |
| LGR4          | 0.06  | 7.69E-01 | -0.22 | 2.61E-01 |
| NAGLU         | -0.04 | 8.48E-01 | 0.22  | 2.61E-01 |
| RNU6-676P     | -0.06 | 7.50E-01 | -0.22 | 2.61E-01 |
| RP11-1D12.2   | -0.14 | 4.79E-01 | -0.22 | 2.61E-01 |
| RP11-49I11.2  | -0.13 | 5.19E-01 | -0.22 | 2.61E-01 |
| TRH           | 0.32  | 9.74E-02 | -0.22 | 2.61E-01 |
| VDAC1P1       | 0.21  | 2.80E-01 | 0.22  | 2.61E-01 |
| XLOC_008668   | -0.13 | 4.99E-01 | -0.22 | 2.61E-01 |
| XLOC_013960   | 0.05  | 8.09E-01 | 0.22  | 2.61E-01 |
| ZNF688        | 0.24  | 2.18E-01 | 0.22  | 2.61E-01 |
| ADAD1P2       | 0.02  | 9.32E-01 | -0.22 | 2.62E-01 |
| BTAF1         | -0.11 | 5.71E-01 | -0.22 | 2.62E-01 |
| C22orf24      | 0.03  | 8.61E-01 | -0.22 | 2.62E-01 |
| EIF4A3        | 0.26  | 1.84E-01 | 0.22  | 2.62E-01 |
| NAGPA         | 0.31  | 1.12E-01 | 0.22  | 2.62E-01 |
| PTPN20A       | -0.15 | 4.54E-01 | -0.22 | 2.62E-01 |
| RP11-30L15.6  | 0.37  | 5.08E-02 | -0.22 | 2.62E-01 |
| RP11-415J8.5  | 0.07  | 7.07E-01 | 0.22  | 2.62E-01 |
| RP11-46F15.2  | 0.04  | 8.56E-01 | -0.22 | 2.62E-01 |

|                      |       |          |       |          |
|----------------------|-------|----------|-------|----------|
| <b>RP11-49907.7</b>  | -0.10 | 6.10E-01 | -0.22 | 2.62E-01 |
| <b>RP11-549L6.2</b>  | -0.15 | 4.36E-01 | -0.22 | 2.62E-01 |
| <b>SAMM50P1</b>      | -0.12 | 5.30E-01 | -0.22 | 2.62E-01 |
| <b>ABCB10</b>        | 0.00  | 9.90E-01 | -0.22 | 2.62E-01 |
| <b>ARID3C</b>        | -0.03 | 8.83E-01 | -0.22 | 2.62E-01 |
| <b>CTB-109A12.1</b>  | -0.15 | 4.54E-01 | -0.22 | 2.62E-01 |
| <b>EPN1</b>          | 0.39  | 3.91E-02 | 0.22  | 2.62E-01 |
| <b>GLCCI1</b>        | -0.32 | 9.36E-02 | -0.22 | 2.62E-01 |
| <b>KIAA1614-AS1</b>  | -0.05 | 8.11E-01 | -0.22 | 2.62E-01 |
| <b>METTL12</b>       | 0.21  | 2.78E-01 | 0.22  | 2.62E-01 |
| <b>MKRN2OS</b>       | 0.00  | 9.80E-01 | 0.22  | 2.62E-01 |
| <b>NSFP1</b>         | 0.09  | 6.66E-01 | 0.22  | 2.62E-01 |
| <b>RBMXL1</b>        | 0.05  | 8.14E-01 | 0.22  | 2.62E-01 |
| <b>TBC1D17</b>       | 0.03  | 8.77E-01 | 0.22  | 2.62E-01 |
| <b>XLOC_002780</b>   | -0.45 | 1.59E-02 | -0.22 | 2.62E-01 |
| <b>XLOC_011523</b>   | -0.12 | 5.37E-01 | 0.22  | 2.62E-01 |
| <b>AC005546.2</b>    | 0.12  | 5.37E-01 | 0.22  | 2.63E-01 |
| <b>AKAP13</b>        | -0.46 | 1.42E-02 | -0.22 | 2.63E-01 |
| <b>C1GALT1</b>       | 0.23  | 2.37E-01 | -0.22 | 2.63E-01 |
| <b>FLJ26850</b>      | -0.04 | 8.36E-01 | 0.22  | 2.63E-01 |
| <b>G31132</b>        | -0.16 | 4.26E-01 | -0.22 | 2.63E-01 |
| <b>G42642</b>        | -0.17 | 3.96E-01 | -0.22 | 2.63E-01 |
| <b>HOXB5</b>         | -0.04 | 8.39E-01 | 0.22  | 2.63E-01 |
| <b>KCNA7</b>         | -0.21 | 2.73E-01 | 0.22  | 2.63E-01 |
| <b>MAN1A2</b>        | 0.22  | 2.51E-01 | -0.22 | 2.63E-01 |
| <b>MIR3945HG</b>     | 0.24  | 2.10E-01 | 0.22  | 2.63E-01 |
| <b>MRGPRF</b>        | -0.05 | 7.94E-01 | 0.22  | 2.63E-01 |
| <b>PPIP5K2</b>       | -0.02 | 9.31E-01 | -0.22 | 2.63E-01 |
| <b>RP11-182N22.9</b> | 0.19  | 3.42E-01 | -0.22 | 2.63E-01 |
| <b>RP11-454E5.4</b>  | -0.12 | 5.34E-01 | -0.22 | 2.63E-01 |
| <b>RP11-767L7.1</b>  | 0.02  | 9.09E-01 | -0.22 | 2.63E-01 |
| <b>RP11-872J21.3</b> | 0.07  | 7.15E-01 | 0.22  | 2.63E-01 |
| <b>SLC35C1</b>       | 0.33  | 8.64E-02 | 0.22  | 2.63E-01 |
| <b>SPOCK1</b>        | -0.11 | 5.85E-01 | 0.22  | 2.63E-01 |
| <b>TFAP2E</b>        | -0.11 | 5.81E-01 | -0.22 | 2.63E-01 |
| <b>VPS28</b>         | 0.03  | 8.82E-01 | 0.22  | 2.63E-01 |
| <b>WBP1L</b>         | 0.15  | 4.39E-01 | 0.22  | 2.63E-01 |
| <b>XLOC_000828</b>   | 0.03  | 8.81E-01 | -0.22 | 2.63E-01 |
| <b>ZC3H8</b>         | -0.14 | 4.82E-01 | -0.22 | 2.63E-01 |
| <b>ABHD12</b>        | 0.21  | 2.83E-01 | 0.22  | 2.64E-01 |
| <b>AL590762.11</b>   | -0.19 | 3.31E-01 | -0.22 | 2.64E-01 |
| <b>AP000350.5</b>    | -0.22 | 2.53E-01 | 0.22  | 2.64E-01 |
| <b>C18orf32</b>      | -0.17 | 3.88E-01 | -0.22 | 2.64E-01 |
| <b>CYP2S1</b>        | 0.14  | 4.89E-01 | 0.22  | 2.64E-01 |
| <b>G27789</b>        | 0.14  | 4.84E-01 | -0.22 | 2.64E-01 |
| <b>INSM1</b>         | -0.01 | 9.65E-01 | 0.22  | 2.64E-01 |
| <b>KB-7G2.9</b>      | -0.03 | 8.89E-01 | 0.22  | 2.64E-01 |

|                |       |          |       |          |
|----------------|-------|----------|-------|----------|
| LRRCS5         | 0.31  | 1.08E-01 | 0.22  | 2.64E-01 |
| PIPSL          | 0.18  | 3.55E-01 | -0.22 | 2.64E-01 |
| RNU7-160P      | -0.27 | 1.71E-01 | 0.22  | 2.64E-01 |
| RP11-159M11.2  | -0.29 | 1.40E-01 | -0.22 | 2.64E-01 |
| RP11-173P15.10 | -0.09 | 6.60E-01 | -0.22 | 2.64E-01 |
| RP11-524O1.4   | -0.27 | 1.59E-01 | 0.22  | 2.64E-01 |
| RPP30          | -0.28 | 1.48E-01 | -0.22 | 2.64E-01 |
| SLC28A2        | 0.04  | 8.26E-01 | 0.22  | 2.64E-01 |
| SOAT1          | -0.12 | 5.45E-01 | -0.22 | 2.64E-01 |
| SYNGR1         | -0.15 | 4.53E-01 | 0.22  | 2.64E-01 |
| U47924.31      | -0.23 | 2.35E-01 | 0.22  | 2.64E-01 |
| UBQLN4P1       | 0.00  | 9.92E-01 | 0.22  | 2.64E-01 |
| ACR            | 0.23  | 2.45E-01 | -0.22 | 2.64E-01 |
| CBX3P2         | -0.01 | 9.45E-01 | -0.22 | 2.64E-01 |
| CCNG1          | 0.41  | 3.06E-02 | -0.22 | 2.64E-01 |
| KRTAP5-9       | -0.23 | 2.35E-01 | -0.22 | 2.64E-01 |
| OVGP1          | -0.15 | 4.31E-01 | -0.22 | 2.64E-01 |
| RNU5E-10P      | -0.23 | 2.34E-01 | -0.22 | 2.64E-01 |
| RP11-637N19.1  | 0.14  | 4.75E-01 | -0.22 | 2.64E-01 |
| RP11-87H9.2    | -0.13 | 5.09E-01 | -0.22 | 2.64E-01 |
| SLC10A2        | -0.10 | 6.20E-01 | -0.22 | 2.64E-01 |
| SSPO           | -0.39 | 3.77E-02 | -0.22 | 2.64E-01 |
| VCL            | -0.08 | 6.96E-01 | -0.22 | 2.64E-01 |
| XLOC_005361    | 0.06  | 7.43E-01 | -0.22 | 2.64E-01 |
| AL121952.1     | 0.03  | 8.97E-01 | 0.22  | 2.64E-01 |
| CNPPD1         | -0.06 | 7.70E-01 | 0.22  | 2.64E-01 |
| DLGAP2         | -0.02 | 9.06E-01 | 0.22  | 2.64E-01 |
| INHBB          | 0.08  | 6.91E-01 | 0.22  | 2.64E-01 |
| RARRES3        | -0.02 | 9.25E-01 | 0.22  | 2.64E-01 |
| SAMD9L         | 0.22  | 2.65E-01 | 0.22  | 2.64E-01 |
| SLFN13         | 0.13  | 5.11E-01 | 0.22  | 2.64E-01 |
| TNFSF15        | 0.27  | 1.59E-01 | 0.22  | 2.64E-01 |
| TOP1           | 0.12  | 5.28E-01 | 0.22  | 2.64E-01 |
| UBE2O          | 0.16  | 4.17E-01 | 0.22  | 2.64E-01 |
| WAS            | 0.09  | 6.45E-01 | 0.22  | 2.64E-01 |
| AC019186.1     | -0.24 | 2.11E-01 | 0.22  | 2.65E-01 |
| AC092295.4     | 0.17  | 3.76E-01 | -0.22 | 2.65E-01 |
| CTD-2184D3.3   | 0.18  | 3.63E-01 | -0.22 | 2.65E-01 |
| DDB2           | 0.06  | 7.66E-01 | 0.22  | 2.65E-01 |
| EPHX3          | 0.42  | 2.61E-02 | 0.22  | 2.65E-01 |
| FAM160B1       | -0.01 | 9.43E-01 | -0.22 | 2.65E-01 |
| G10909         | -0.18 | 3.62E-01 | 0.22  | 2.65E-01 |
| GIPC3          | -0.26 | 1.87E-01 | -0.22 | 2.65E-01 |
| GOLGA8Q        | 0.21  | 2.75E-01 | -0.22 | 2.65E-01 |
| MOSPD1         | 0.32  | 9.30E-02 | 0.22  | 2.65E-01 |
| MUSK           | -0.22 | 2.54E-01 | -0.22 | 2.65E-01 |
| POU6F1         | -0.04 | 8.56E-01 | -0.22 | 2.65E-01 |

|               |       |          |       |          |
|---------------|-------|----------|-------|----------|
| RP11-497E19.1 | -0.04 | 8.28E-01 | 0.22  | 2.65E-01 |
| RP11-766F14.2 | -0.04 | 8.42E-01 | -0.22 | 2.65E-01 |
| RP5-894A10.2  | -0.07 | 7.38E-01 | -0.22 | 2.65E-01 |
| SWSAP1        | 0.27  | 1.72E-01 | 0.22  | 2.65E-01 |
| TEN1-CDK3     | -0.18 | 3.46E-01 | -0.22 | 2.65E-01 |
| TMEM60        | 0.12  | 5.46E-01 | 0.22  | 2.65E-01 |
| USP36         | 0.05  | 8.12E-01 | -0.22 | 2.65E-01 |
| XLOC_011471   | -0.15 | 4.58E-01 | 0.22  | 2.65E-01 |
| AAK1          | -0.01 | 9.47E-01 | 0.22  | 2.66E-01 |
| BHLHE40       | 0.08  | 6.90E-01 | 0.22  | 2.66E-01 |
| CTD-2186M15.3 | -0.02 | 9.31E-01 | 0.22  | 2.66E-01 |
| GTF2IP13      | -0.17 | 4.00E-01 | 0.22  | 2.66E-01 |
| IFIT3         | 0.35  | 6.48E-02 | 0.22  | 2.66E-01 |
| KCTD18        | 0.19  | 3.27E-01 | 0.22  | 2.66E-01 |
| OAF           | 0.10  | 6.13E-01 | 0.22  | 2.66E-01 |
| RP1-43O17.2   | 0.24  | 2.28E-01 | 0.22  | 2.66E-01 |
| RP11-253I19.4 | -0.11 | 5.67E-01 | 0.22  | 2.66E-01 |
| RP11-521D12.5 | -0.18 | 3.62E-01 | 0.22  | 2.66E-01 |
| AC097662.2    | 0.04  | 8.35E-01 | -0.22 | 2.66E-01 |
| EEF1E1        | 0.23  | 2.42E-01 | -0.22 | 2.66E-01 |
| OXCT2         | 0.08  | 6.77E-01 | -0.22 | 2.66E-01 |
| RNU6-722P     | -0.12 | 5.48E-01 | -0.22 | 2.66E-01 |
| RP11-531A24.7 | 0.02  | 9.28E-01 | -0.22 | 2.66E-01 |
| RP11-561N12.5 | -0.06 | 7.68E-01 | -0.22 | 2.66E-01 |
| RPS4XP14      | 0.12  | 5.34E-01 | -0.22 | 2.66E-01 |
| AC026150.8    | -0.42 | 2.52E-02 | 0.22  | 2.66E-01 |
| ADAM20        | -0.23 | 2.29E-01 | -0.22 | 2.66E-01 |
| C1QTNF7       | -0.15 | 4.39E-01 | -0.22 | 2.66E-01 |
| CYP4A11       | 0.13  | 5.01E-01 | -0.22 | 2.66E-01 |
| ENOPH1        | 0.02  | 9.28E-01 | -0.22 | 2.66E-01 |
| GS1-166A23.1  | 0.07  | 7.25E-01 | 0.22  | 2.66E-01 |
| HIRA          | 0.38  | 4.33E-02 | 0.22  | 2.66E-01 |
| HOXC12        | 0.24  | 2.19E-01 | 0.22  | 2.66E-01 |
| PHGR1         | -0.01 | 9.79E-01 | -0.22 | 2.66E-01 |
| RAMP2         | -0.30 | 1.24E-01 | 0.22  | 2.66E-01 |
| RP11-209D20.2 | 0.02  | 9.28E-01 | -0.22 | 2.66E-01 |
| RP11-35G22.1  | 0.30  | 1.21E-01 | -0.22 | 2.66E-01 |
| RP11-420K10.1 | -0.05 | 7.99E-01 | -0.22 | 2.66E-01 |
| RP11-612B6.2  | -0.19 | 3.39E-01 | 0.22  | 2.66E-01 |
| RP11-677M14.3 | -0.25 | 2.07E-01 | -0.22 | 2.66E-01 |
| RP11-720N19.2 | 0.14  | 4.90E-01 | 0.22  | 2.66E-01 |
| RP3-340B19.5  | 0.06  | 7.51E-01 | 0.22  | 2.66E-01 |
| SLC7A11       | 0.26  | 1.79E-01 | 0.22  | 2.66E-01 |
| SMARCC2       | -0.36 | 5.99E-02 | 0.22  | 2.66E-01 |
| TANC1         | 0.09  | 6.55E-01 | -0.22 | 2.66E-01 |
| CCNB3         | -0.14 | 4.72E-01 | 0.22  | 2.67E-01 |
| CCR10         | -0.13 | 5.00E-01 | 0.22  | 2.67E-01 |



|                      |       |          |       |          |
|----------------------|-------|----------|-------|----------|
| <b>CTC-441N14.4</b>  | 0.12  | 5.46E-01 | 0.22  | 2.67E-01 |
| <b>FAM96AP2</b>      | 0.03  | 8.61E-01 | 0.22  | 2.67E-01 |
| <b>FOXP1-AS1</b>     | -0.10 | 6.05E-01 | 0.22  | 2.67E-01 |
| <b>G19170</b>        | 0.31  | 1.09E-01 | 0.22  | 2.67E-01 |
| <b>KCTD21-AS1</b>    | 0.01  | 9.51E-01 | 0.22  | 2.67E-01 |
| <b>NADSYN1</b>       | -0.11 | 5.63E-01 | 0.22  | 2.67E-01 |
| <b>PANK2</b>         | 0.53  | 3.85E-03 | 0.22  | 2.67E-01 |
| <b>RGS20</b>         | -0.01 | 9.43E-01 | 0.22  | 2.67E-01 |
| <b>RP11-380I10.3</b> | 0.04  | 8.54E-01 | 0.22  | 2.67E-01 |
| <b>UNC93A</b>        | 0.20  | 3.02E-01 | 0.22  | 2.67E-01 |
| <b>XLOC_003787</b>   | 0.03  | 8.67E-01 | 0.22  | 2.67E-01 |
| <b>G38643</b>        | -0.06 | 7.45E-01 | -0.22 | 2.67E-01 |
| <b>HPSE2</b>         | -0.01 | 9.57E-01 | -0.22 | 2.67E-01 |
| <b>LINC00678</b>     | -0.19 | 3.39E-01 | -0.22 | 2.67E-01 |
| <b>LRCH1</b>         | -0.23 | 2.44E-01 | -0.22 | 2.67E-01 |
| <b>PRDM10</b>        | -0.40 | 3.72E-02 | -0.22 | 2.67E-01 |
| <b>PTPN13</b>        | -0.09 | 6.60E-01 | -0.22 | 2.67E-01 |
| <b>RP11-118F19.1</b> | -0.30 | 1.19E-01 | -0.22 | 2.67E-01 |
| <b>RP11-2B6.2</b>    | -0.28 | 1.54E-01 | -0.22 | 2.67E-01 |
| <b>RP11-2K6.2</b>    | -0.10 | 6.31E-01 | -0.22 | 2.67E-01 |
| <b>RP11-308D13.3</b> | -0.15 | 4.59E-01 | -0.22 | 2.67E-01 |
| <b>RP11-708L7.9</b>  | 0.30  | 1.23E-01 | -0.22 | 2.67E-01 |
| <b>SREK1</b>         | -0.13 | 5.07E-01 | -0.22 | 2.67E-01 |
| <b>SSR3</b>          | 0.06  | 7.64E-01 | -0.22 | 2.67E-01 |
| <b>TRMT6</b>         | 0.17  | 3.79E-01 | -0.22 | 2.67E-01 |
| <b>AC006116.17</b>   | -0.06 | 7.58E-01 | -0.22 | 2.68E-01 |
| <b>AC007690.1</b>    | -0.22 | 2.55E-01 | 0.22  | 2.68E-01 |
| <b>AC009228.1</b>    | -0.14 | 4.72E-01 | -0.22 | 2.68E-01 |
| <b>AC015726.1</b>    | -0.18 | 3.61E-01 | -0.22 | 2.68E-01 |
| <b>AIG1P1</b>        | -0.54 | 2.72E-03 | -0.22 | 2.68E-01 |
| <b>CWH43</b>         | 0.16  | 4.20E-01 | 0.22  | 2.68E-01 |
| <b>DUX4L50</b>       | -0.14 | 4.85E-01 | 0.22  | 2.68E-01 |
| <b>ELL</b>           | 0.12  | 5.56E-01 | 0.22  | 2.68E-01 |
| <b>FKRP</b>          | 0.17  | 3.86E-01 | 0.22  | 2.68E-01 |
| <b>LINC01272</b>     | 0.09  | 6.48E-01 | 0.22  | 2.68E-01 |
| <b>MACROD2</b>       | -0.28 | 1.54E-01 | -0.22 | 2.68E-01 |
| <b>NPNT</b>          | -0.02 | 9.04E-01 | 0.22  | 2.68E-01 |
| <b>PIK3R5</b>        | 0.11  | 5.85E-01 | 0.22  | 2.68E-01 |
| <b>RP11-144A16.8</b> | -0.07 | 7.20E-01 | -0.22 | 2.68E-01 |
| <b>RP11-196G11.5</b> | 0.06  | 7.54E-01 | -0.22 | 2.68E-01 |
| <b>RP11-304F15.3</b> | -0.19 | 3.46E-01 | -0.22 | 2.68E-01 |
| <b>RP11-337N6.1</b>  | -0.08 | 6.77E-01 | -0.22 | 2.68E-01 |
| <b>RP11-460N20.4</b> | -0.10 | 6.18E-01 | -0.22 | 2.68E-01 |
| <b>RP11-57H12.5</b>  | -0.36 | 5.82E-02 | -0.22 | 2.68E-01 |
| <b>TMEM263</b>       | 0.18  | 3.51E-01 | -0.22 | 2.68E-01 |
| <b>XLOC_007725</b>   | -0.09 | 6.33E-01 | -0.22 | 2.68E-01 |
| <b>ZNF480</b>        | 0.24  | 2.14E-01 | 0.22  | 2.68E-01 |

|                |       |          |       |          |
|----------------|-------|----------|-------|----------|
| ZNF665         | -0.11 | 5.93E-01 | -0.22 | 2.68E-01 |
| AIF1L          | -0.26 | 1.86E-01 | -0.22 | 2.68E-01 |
| ANAPC1         | 0.12  | 5.29E-01 | -0.22 | 2.68E-01 |
| APPL1          | 0.11  | 5.94E-01 | -0.22 | 2.68E-01 |
| ARL6IP6        | 0.08  | 6.80E-01 | -0.22 | 2.68E-01 |
| CAMK2N1        | -0.13 | 4.93E-01 | -0.22 | 2.68E-01 |
| CD44           | 0.07  | 7.29E-01 | 0.22  | 2.68E-01 |
| DRD4           | 0.16  | 4.20E-01 | 0.22  | 2.68E-01 |
| GHC-857G6.7    | -0.36 | 5.82E-02 | -0.22 | 2.68E-01 |
| KLHL5          | 0.10  | 6.00E-01 | 0.22  | 2.68E-01 |
| LRP1B          | 0.07  | 7.40E-01 | -0.22 | 2.68E-01 |
| LY6G6C         | -0.22 | 2.61E-01 | 0.22  | 2.68E-01 |
| PID1           | 0.00  | 9.83E-01 | 0.22  | 2.68E-01 |
| POU5F1         | 0.03  | 8.93E-01 | -0.22 | 2.68E-01 |
| RNU6-1278P     | -0.09 | 6.45E-01 | -0.22 | 2.68E-01 |
| RP11-305O4.3   | -0.18 | 3.55E-01 | -0.22 | 2.68E-01 |
| RPL23AP18      | 0.01  | 9.60E-01 | -0.22 | 2.68E-01 |
| TRGV5          | 0.29  | 1.38E-01 | 0.22  | 2.68E-01 |
| ZNF653         | -0.13 | 4.95E-01 | -0.22 | 2.68E-01 |
| CPAMD8         | -0.15 | 4.37E-01 | 0.22  | 2.69E-01 |
| MAP3K5         | 0.33  | 9.01E-02 | 0.22  | 2.69E-01 |
| MTCO1P12       | 0.13  | 5.07E-01 | 0.22  | 2.69E-01 |
| RP1-18D14.7    | 0.25  | 1.97E-01 | 0.22  | 2.69E-01 |
| RP5-1056H1.2   | 0.09  | 6.52E-01 | 0.22  | 2.69E-01 |
| RSAD1          | 0.29  | 1.38E-01 | 0.22  | 2.69E-01 |
| SH2D4A         | 0.21  | 2.73E-01 | 0.22  | 2.69E-01 |
| TSEN54         | -0.12 | 5.42E-01 | 0.22  | 2.69E-01 |
| ADGRD1         | -0.21 | 2.93E-01 | -0.22 | 2.69E-01 |
| CTA-217C2.2    | -0.15 | 4.33E-01 | -0.22 | 2.69E-01 |
| CTB-92J24.2    | 0.02  | 9.11E-01 | -0.22 | 2.69E-01 |
| INSL6          | -0.18 | 3.48E-01 | -0.22 | 2.69E-01 |
| NOV            | 0.09  | 6.67E-01 | -0.22 | 2.69E-01 |
| RP11-363E7.4   | -0.23 | 2.31E-01 | -0.22 | 2.69E-01 |
| RSPH14         | -0.07 | 7.11E-01 | -0.22 | 2.69E-01 |
| STAC3          | 0.00  | 9.86E-01 | -0.22 | 2.69E-01 |
| TCF15          | 0.08  | 6.83E-01 | -0.22 | 2.69E-01 |
| AC115115.3     | -0.16 | 4.21E-01 | -0.22 | 2.70E-01 |
| EIF1B          | 0.07  | 7.13E-01 | -0.22 | 2.70E-01 |
| GABRD          | -0.13 | 5.17E-01 | -0.22 | 2.70E-01 |
| LRIG3          | -0.42 | 2.66E-02 | -0.22 | 2.70E-01 |
| MLLT4          | 0.12  | 5.27E-01 | -0.22 | 2.70E-01 |
| RP11-125O115.1 | 0.03  | 8.64E-01 | -0.22 | 2.70E-01 |
| ST6GALNAC5     | 0.13  | 5.11E-01 | -0.22 | 2.70E-01 |
| TBPL1          | 0.20  | 3.01E-01 | -0.22 | 2.70E-01 |
| ZC4H2          | 0.09  | 6.65E-01 | -0.22 | 2.70E-01 |
| AMACR          | -0.20 | 2.99E-01 | 0.22  | 2.70E-01 |
| ATP7B          | 0.10  | 6.26E-01 | 0.22  | 2.70E-01 |

|               |       |          |       |          |
|---------------|-------|----------|-------|----------|
| GRAMD1A       | 0.09  | 6.43E-01 | 0.22  | 2.70E-01 |
| GRAMD4        | 0.16  | 4.06E-01 | 0.22  | 2.70E-01 |
| HSD17B3       | -0.12 | 5.33E-01 | 0.22  | 2.70E-01 |
| KCNMB1        | 0.06  | 7.67E-01 | 0.22  | 2.70E-01 |
| KRT5          | -0.03 | 8.69E-01 | 0.22  | 2.70E-01 |
| LCE1D         | 0.05  | 7.89E-01 | 0.22  | 2.70E-01 |
| MGRN1         | 0.03  | 8.77E-01 | 0.22  | 2.70E-01 |
| PARP10        | 0.20  | 3.02E-01 | 0.22  | 2.70E-01 |
| RP11-631M6.3  | 0.23  | 2.38E-01 | 0.22  | 2.70E-01 |
| TANGO6        | 0.23  | 2.43E-01 | 0.22  | 2.70E-01 |
| TECPR1        | 0.28  | 1.52E-01 | 0.22  | 2.70E-01 |
| snoZ5         | -0.08 | 6.87E-01 | 0.22  | 2.70E-01 |
| ARV1          | 0.10  | 5.97E-01 | 0.22  | 2.70E-01 |
| G35511        | -0.08 | 6.92E-01 | 0.22  | 2.70E-01 |
| IGHG4         | 0.34  | 7.74E-02 | 0.22  | 2.70E-01 |
| IGSF22        | 0.07  | 7.09E-01 | 0.22  | 2.70E-01 |
| INPP5K        | -0.15 | 4.46E-01 | 0.22  | 2.70E-01 |
| MPV17         | -0.22 | 2.53E-01 | 0.22  | 2.70E-01 |
| RASSF1        | -0.01 | 9.40E-01 | 0.22  | 2.70E-01 |
| RP11-353H3.1  | -0.12 | 5.46E-01 | 0.22  | 2.70E-01 |
| RP11-367F23.2 | 0.08  | 6.72E-01 | 0.22  | 2.70E-01 |
| RP11-62I21.1  | 0.04  | 8.55E-01 | 0.22  | 2.70E-01 |
| RPL7P49       | -0.09 | 6.47E-01 | 0.22  | 2.70E-01 |
| SMPD3         | 0.35  | 6.94E-02 | 0.22  | 2.70E-01 |
| XGY1          | 0.47  | 1.15E-02 | 0.22  | 2.70E-01 |
| AC005154.7    | -0.14 | 4.71E-01 | -0.22 | 2.70E-01 |
| AGR2          | -0.11 | 5.74E-01 | -0.22 | 2.70E-01 |
| CTD-2292M16.8 | -0.10 | 6.23E-01 | -0.22 | 2.70E-01 |
| KIAA1522      | 0.00  | 9.83E-01 | -0.22 | 2.70E-01 |
| MYEOV         | -0.19 | 3.35E-01 | -0.22 | 2.70E-01 |
| NEURL1B       | -0.11 | 5.79E-01 | -0.22 | 2.70E-01 |
| RP11-283G6.4  | -0.26 | 1.78E-01 | -0.22 | 2.70E-01 |
| RP11-310H4.6  | 0.18  | 3.50E-01 | -0.22 | 2.70E-01 |
| RP11-343N15.5 | -0.14 | 4.93E-01 | -0.22 | 2.70E-01 |
| RP11-702F3.1  | -0.05 | 7.93E-01 | -0.22 | 2.70E-01 |
| SNORD59A      | 0.20  | 3.05E-01 | -0.22 | 2.70E-01 |
| XLOC_005549   | -0.37 | 5.60E-02 | -0.22 | 2.70E-01 |
| AC003080.4    | -0.02 | 9.08E-01 | 0.22  | 2.71E-01 |
| CILP          | -0.28 | 1.44E-01 | 0.22  | 2.71E-01 |
| COX6B1P3      | 0.24  | 2.24E-01 | 0.22  | 2.71E-01 |
| CTD-2227E11.1 | 0.15  | 4.40E-01 | -0.22 | 2.71E-01 |
| CTD-2292P10.4 | 0.11  | 5.82E-01 | -0.22 | 2.71E-01 |
| E2F6          | 0.05  | 7.97E-01 | -0.22 | 2.71E-01 |
| EEF1A1P5      | -0.03 | 8.83E-01 | 0.22  | 2.71E-01 |
| FAM134A       | 0.10  | 6.09E-01 | 0.22  | 2.71E-01 |
| GLTP          | 0.31  | 1.14E-01 | 0.22  | 2.71E-01 |
| HDDC3         | 0.17  | 3.94E-01 | 0.22  | 2.71E-01 |

|                  |       |          |       |          |
|------------------|-------|----------|-------|----------|
| LAYN             | -0.10 | 6.31E-01 | 0.22  | 2.71E-01 |
| LINC01224        | -0.26 | 1.76E-01 | -0.22 | 2.71E-01 |
| LLGL2            | -0.08 | 6.86E-01 | -0.22 | 2.71E-01 |
| MLLT10           | -0.37 | 5.60E-02 | -0.22 | 2.71E-01 |
| PLD5             | 0.07  | 7.13E-01 | -0.22 | 2.71E-01 |
| RP1-140C12.2     | -0.27 | 1.63E-01 | -0.22 | 2.71E-01 |
| RP11-1081L13.4   | -0.10 | 6.01E-01 | -0.22 | 2.71E-01 |
| RP11-394J1.2     | 0.14  | 4.66E-01 | 0.22  | 2.71E-01 |
| RP3-342P20.2     | -0.05 | 8.14E-01 | -0.22 | 2.71E-01 |
| SKP1P1           | 0.07  | 7.35E-01 | 0.22  | 2.71E-01 |
| SRF              | 0.06  | 7.78E-01 | 0.22  | 2.71E-01 |
| WDR4             | -0.08 | 6.79E-01 | 0.22  | 2.71E-01 |
| KXbac-B444P24.13 | 0.00  | 9.90E-01 | -0.22 | 2.71E-01 |
| ZNF7             | 0.19  | 3.31E-01 | -0.22 | 2.71E-01 |
| CELF2-AS2        | 0.01  | 9.72E-01 | -0.22 | 2.72E-01 |
| G10551           | 0.07  | 7.21E-01 | -0.22 | 2.72E-01 |
| G39803           | 0.13  | 5.22E-01 | -0.22 | 2.72E-01 |
| GPR20            | 0.02  | 9.12E-01 | -0.22 | 2.72E-01 |
| HIATL1           | 0.30  | 1.22E-01 | -0.22 | 2.72E-01 |
| HSD3BP2          | 0.31  | 1.14E-01 | -0.22 | 2.72E-01 |
| KLK15            | -0.05 | 7.96E-01 | -0.22 | 2.72E-01 |
| LINC01068        | -0.20 | 3.06E-01 | -0.22 | 2.72E-01 |
| PPP2R2B          | -0.06 | 7.65E-01 | -0.22 | 2.72E-01 |
| RP11-15H20.6     | 0.17  | 3.81E-01 | -0.22 | 2.72E-01 |
| RP11-751K21.1    | 0.01  | 9.43E-01 | -0.22 | 2.72E-01 |
| RP13-455A7.1     | -0.04 | 8.23E-01 | -0.22 | 2.72E-01 |
| SLC22A17         | -0.45 | 1.66E-02 | -0.22 | 2.72E-01 |
| ZIC4             | -0.19 | 3.30E-01 | -0.22 | 2.72E-01 |
| CDC42BPB         | 0.16  | 4.29E-01 | 0.22  | 2.72E-01 |
| FUT3             | 0.27  | 1.73E-01 | 0.22  | 2.72E-01 |
| HMGB1P24         | -0.23 | 2.43E-01 | 0.22  | 2.72E-01 |
| NAV2-IT1         | -0.23 | 2.47E-01 | 0.22  | 2.72E-01 |
| P2RY2            | 0.32  | 1.01E-01 | 0.22  | 2.72E-01 |
| PATL1            | 0.09  | 6.57E-01 | 0.22  | 2.72E-01 |
| PPP1R3B          | -0.16 | 4.29E-01 | 0.22  | 2.72E-01 |
| RP11-465K4.4     | 0.01  | 9.78E-01 | 0.22  | 2.72E-01 |
| RP5-836N17.4     | 0.37  | 5.18E-02 | 0.22  | 2.72E-01 |
| RPL23AP55        | 0.19  | 3.37E-01 | 0.22  | 2.72E-01 |
| AC018755.1       | -0.31 | 1.09E-01 | 0.22  | 2.72E-01 |
| ATRIP            | -0.05 | 8.16E-01 | 0.22  | 2.72E-01 |
| CTC-260E6.6      | -0.06 | 7.69E-01 | -0.22 | 2.72E-01 |
| CTD-2267D19.1    | -0.16 | 4.15E-01 | 0.22  | 2.72E-01 |
| FAM120AOS        | 0.14  | 4.81E-01 | 0.22  | 2.72E-01 |
| FAM26E           | 0.00  | 9.96E-01 | -0.22 | 2.72E-01 |
| FSD1L            | -0.14 | 4.79E-01 | -0.22 | 2.72E-01 |
| G7822            | -0.20 | 3.16E-01 | -0.22 | 2.72E-01 |
| GPBP1            | 0.04  | 8.32E-01 | -0.22 | 2.72E-01 |

|                |       |          |       |          |
|----------------|-------|----------|-------|----------|
| MTX1P1         | 0.16  | 4.03E-01 | 0.22  | 2.72E-01 |
| PDC            | -0.31 | 1.13E-01 | -0.22 | 2.72E-01 |
| RALY-AS1       | 0.16  | 4.29E-01 | 0.22  | 2.72E-01 |
| RP11-26L20.3   | -0.11 | 5.77E-01 | -0.22 | 2.72E-01 |
| RP11-720L2.2   | -0.05 | 7.94E-01 | -0.22 | 2.72E-01 |
| S100A5         | -0.41 | 3.22E-02 | 0.22  | 2.72E-01 |
| TPSG1          | -0.13 | 5.18E-01 | 0.22  | 2.72E-01 |
| ZNF26          | -0.10 | 6.08E-01 | -0.22 | 2.72E-01 |
| ZNF697         | -0.08 | 6.87E-01 | 0.22  | 2.72E-01 |
| AC012368.1     | -0.09 | 6.67E-01 | -0.22 | 2.73E-01 |
| AC079325.6     | 0.18  | 3.67E-01 | 0.22  | 2.73E-01 |
| AKAP3          | 0.04  | 8.36E-01 | 0.22  | 2.73E-01 |
| AKT1S1         | 0.38  | 4.66E-02 | 0.22  | 2.73E-01 |
| B3GNT8         | 0.12  | 5.37E-01 | 0.22  | 2.73E-01 |
| C11orf71       | -0.17 | 3.98E-01 | 0.22  | 2.73E-01 |
| CDC42EP3P1     | -0.17 | 3.88E-01 | 0.22  | 2.73E-01 |
| CTD-2619J13.5  | -0.34 | 7.44E-02 | 0.22  | 2.73E-01 |
| ESRRB          | 0.03  | 8.75E-01 | 0.22  | 2.73E-01 |
| FAM110D        | -0.10 | 6.05E-01 | 0.22  | 2.73E-01 |
| GCK            | 0.26  | 1.80E-01 | -0.22 | 2.73E-01 |
| IGFBP6         | -0.04 | 8.45E-01 | 0.22  | 2.73E-01 |
| KHDC1          | 0.13  | 4.93E-01 | 0.22  | 2.73E-01 |
| LINC00205      | -0.13 | 5.05E-01 | -0.22 | 2.73E-01 |
| MIR4697HG      | -0.32 | 1.01E-01 | -0.22 | 2.73E-01 |
| MIR562         | 0.16  | 4.05E-01 | -0.22 | 2.73E-01 |
| NUDT9          | -0.11 | 5.71E-01 | 0.22  | 2.73E-01 |
| OR2A1-AS1      | 0.21  | 2.87E-01 | -0.22 | 2.73E-01 |
| PWRN1          | 0.15  | 4.44E-01 | -0.22 | 2.73E-01 |
| RNA5SP507      | 0.06  | 7.50E-01 | -0.22 | 2.73E-01 |
| RP11-1123I8.1  | 0.06  | 7.48E-01 | 0.22  | 2.73E-01 |
| RP11-1275H24.1 | 0.34  | 7.42E-02 | 0.22  | 2.73E-01 |
| RP11-329B9.3   | -0.14 | 4.92E-01 | -0.22 | 2.73E-01 |
| RRP8           | 0.26  | 1.81E-01 | -0.22 | 2.73E-01 |
| TAGLN2P1       | -0.24 | 2.23E-01 | 0.22  | 2.73E-01 |
| VAMP8          | 0.09  | 6.64E-01 | 0.22  | 2.73E-01 |
| AC008697.1     | 0.12  | 5.47E-01 | 0.22  | 2.74E-01 |
| AKAP9          | -0.10 | 5.96E-01 | -0.22 | 2.74E-01 |
| ARMT1          | 0.22  | 2.65E-01 | 0.22  | 2.74E-01 |
| ASUN           | 0.04  | 8.45E-01 | 0.22  | 2.74E-01 |
| CLN3           | 0.04  | 8.51E-01 | 0.22  | 2.74E-01 |
| CRACR2B        | -0.35 | 7.01E-02 | -0.22 | 2.74E-01 |
| CTAGE5         | 0.16  | 4.07E-01 | -0.22 | 2.74E-01 |
| DIP2B          | -0.16 | 4.28E-01 | -0.22 | 2.74E-01 |
| EBF1           | -0.42 | 2.76E-02 | 0.22  | 2.74E-01 |
| FAM86B3P       | 0.02  | 9.15E-01 | -0.22 | 2.74E-01 |
| FDXR           | 0.03  | 8.71E-01 | 0.22  | 2.74E-01 |
| FKTN           | 0.20  | 3.09E-01 | -0.22 | 2.74E-01 |

|               |       |          |       |          |
|---------------|-------|----------|-------|----------|
| ITGA2         | 0.13  | 5.08E-01 | 0.22  | 2.74E-01 |
| ITGB8         | 0.18  | 3.72E-01 | -0.22 | 2.74E-01 |
| KCTD1         | 0.26  | 1.89E-01 | 0.22  | 2.74E-01 |
| LINC00284     | -0.19 | 3.41E-01 | -0.22 | 2.74E-01 |
| LLNLR-304G9.1 | 0.01  | 9.64E-01 | -0.22 | 2.74E-01 |
| MAPT-AS1      | -0.40 | 3.63E-02 | 0.22  | 2.74E-01 |
| OARD1         | -0.09 | 6.61E-01 | 0.22  | 2.74E-01 |
| PHOSPHO2      | -0.03 | 8.71E-01 | -0.22 | 2.74E-01 |
| PON3          | 0.55  | 2.19E-03 | -0.22 | 2.74E-01 |
| RP1-20N2.8    | 0.20  | 3.03E-01 | -0.22 | 2.74E-01 |
| RP5-1142A6.10 | -0.12 | 5.59E-01 | -0.22 | 2.74E-01 |
| STARD13       | -0.03 | 8.99E-01 | 0.22  | 2.74E-01 |
| SYT13         | 0.09  | 6.32E-01 | 0.22  | 2.74E-01 |
| TNFAIP8L1     | 0.01  | 9.71E-01 | 0.22  | 2.74E-01 |
| UBE2U         | -0.05 | 8.19E-01 | 0.22  | 2.74E-01 |
| AC027612.1    | 0.07  | 7.21E-01 | 0.22  | 2.74E-01 |
| C8orf58       | -0.04 | 8.54E-01 | 0.22  | 2.74E-01 |
| CHCHD2P6      | 0.27  | 1.58E-01 | 0.22  | 2.74E-01 |
| CHTF8         | 0.01  | 9.61E-01 | 0.22  | 2.74E-01 |
| CTB-176F20.3  | -0.28 | 1.44E-01 | -0.22 | 2.74E-01 |
| CTSV          | -0.13 | 5.10E-01 | -0.22 | 2.74E-01 |
| FOS           | -0.18 | 3.58E-01 | -0.22 | 2.74E-01 |
| GPR17         | -0.10 | 5.98E-01 | -0.22 | 2.74E-01 |
| INSIG1        | 0.04  | 8.54E-01 | -0.22 | 2.74E-01 |
| MIER1         | 0.05  | 7.88E-01 | -0.22 | 2.74E-01 |
| NDC1          | 0.21  | 2.92E-01 | -0.22 | 2.74E-01 |
| RGS19         | 0.16  | 4.09E-01 | 0.22  | 2.74E-01 |
| RP11-457M11.6 | 0.08  | 6.75E-01 | -0.22 | 2.74E-01 |
| RP11-609N14.4 | 0.15  | 4.61E-01 | -0.22 | 2.74E-01 |
| RP11-624C23.1 | -0.39 | 4.04E-02 | 0.22  | 2.74E-01 |
| RP11-642A1.2  | -0.02 | 9.04E-01 | 0.22  | 2.74E-01 |
| TGFBR1        | 0.10  | 6.01E-01 | 0.22  | 2.74E-01 |
| XLOC_006299   | -0.08 | 6.94E-01 | -0.22 | 2.74E-01 |
| XLOC_011484   | -0.26 | 1.87E-01 | -0.22 | 2.74E-01 |
| XLOC_013863   | 0.27  | 1.62E-01 | -0.22 | 2.74E-01 |
| AC015849.19   | -0.17 | 3.85E-01 | -0.22 | 2.75E-01 |
| AKAP8         | -0.13 | 5.13E-01 | -0.22 | 2.75E-01 |
| ANKAR         | -0.04 | 8.46E-01 | -0.22 | 2.75E-01 |
| NUTM2E        | -0.23 | 2.33E-01 | -0.22 | 2.75E-01 |
| RNU6-341P     | -0.04 | 8.52E-01 | -0.22 | 2.75E-01 |
| RP11-286N22.6 | 0.41  | 3.20E-02 | -0.22 | 2.75E-01 |
| RP11-48B3.4   | 0.07  | 7.30E-01 | -0.22 | 2.75E-01 |
| RP11-57G10.8  | -0.02 | 9.25E-01 | -0.22 | 2.75E-01 |
| RP11-676J12.8 | -0.17 | 3.76E-01 | -0.22 | 2.75E-01 |
| SLC1A1        | 0.09  | 6.46E-01 | -0.22 | 2.75E-01 |
| TM9SF1        | 0.01  | 9.79E-01 | -0.22 | 2.75E-01 |
| VPS26BP1      | 0.11  | 5.91E-01 | -0.22 | 2.75E-01 |

|                       |       |          |       |          |
|-----------------------|-------|----------|-------|----------|
| <b>CTD-2161E19.1</b>  | 0.18  | 3.60E-01 | 0.22  | 2.75E-01 |
| <b>DDX60L</b>         | 0.38  | 4.81E-02 | 0.22  | 2.75E-01 |
| <b>EZH2</b>           | 0.05  | 8.17E-01 | 0.22  | 2.75E-01 |
| <b>G28250</b>         | 0.23  | 2.49E-01 | 0.22  | 2.75E-01 |
| <b>IGKC</b>           | 0.42  | 2.55E-02 | 0.22  | 2.75E-01 |
| <b>MIR4999</b>        | -0.06 | 7.58E-01 | 0.22  | 2.75E-01 |
| <b>SYNPR</b>          | -0.14 | 4.72E-01 | 0.22  | 2.75E-01 |
| <b>TSTA3</b>          | 0.10  | 6.21E-01 | 0.22  | 2.75E-01 |
| <b>XLOC_003400</b>    | 0.37  | 5.20E-02 | 0.22  | 2.75E-01 |
| <b>ZER1</b>           | 0.19  | 3.26E-01 | 0.22  | 2.75E-01 |
| <b>AC017084.1</b>     | 0.19  | 3.26E-01 | 0.22  | 2.76E-01 |
| <b>AC098614.2</b>     | 0.00  | 9.83E-01 | 0.22  | 2.76E-01 |
| <b>ARMCX6</b>         | -0.22 | 2.64E-01 | -0.22 | 2.76E-01 |
| <b>CA4</b>            | -0.17 | 3.79E-01 | 0.22  | 2.76E-01 |
| <b>CASP9</b>          | -0.02 | 9.08E-01 | 0.22  | 2.76E-01 |
| <b>CTD-2560C21.1</b>  | -0.07 | 7.32E-01 | -0.22 | 2.76E-01 |
| <b>EDRF1</b>          | -0.06 | 7.47E-01 | -0.22 | 2.76E-01 |
| <b>EPT1</b>           | -0.10 | 6.19E-01 | -0.22 | 2.76E-01 |
| <b>ERBB3</b>          | -0.02 | 9.31E-01 | 0.22  | 2.76E-01 |
| <b>FBF1</b>           | 0.16  | 4.30E-01 | 0.22  | 2.76E-01 |
| <b>GLO1</b>           | -0.03 | 8.92E-01 | -0.22 | 2.76E-01 |
| <b>HHATL</b>          | -0.09 | 6.60E-01 | -0.22 | 2.76E-01 |
| <b>ICE2</b>           | 0.10  | 5.97E-01 | -0.22 | 2.76E-01 |
| <b>RN7SKP163</b>      | 0.01  | 9.78E-01 | -0.22 | 2.76E-01 |
| <b>RNU7-162P</b>      | 0.08  | 6.87E-01 | -0.22 | 2.76E-01 |
| <b>RP11-1038A11.1</b> | -0.15 | 4.43E-01 | -0.22 | 2.76E-01 |
| <b>RP11-513O13.1</b>  | -0.27 | 1.67E-01 | -0.22 | 2.76E-01 |
| <b>RP11-64K12.9</b>   | -0.41 | 2.91E-02 | 0.22  | 2.76E-01 |
| <b>RP11-701P16.2</b>  | -0.33 | 8.29E-02 | -0.22 | 2.76E-01 |
| <b>RP11-830F9.6</b>   | 0.01  | 9.67E-01 | 0.22  | 2.76E-01 |
| <b>XLOC_012692</b>    | 0.20  | 3.19E-01 | 0.22  | 2.76E-01 |
| <b>AARS2</b>          | 0.26  | 1.80E-01 | 0.22  | 2.77E-01 |
| <b>AC108488.4</b>     | -0.01 | 9.64E-01 | 0.22  | 2.77E-01 |
| <b>BPIFB9P</b>        | -0.07 | 7.07E-01 | -0.22 | 2.77E-01 |
| <b>CTB-92J24.3</b>    | -0.09 | 6.37E-01 | -0.22 | 2.77E-01 |
| <b>G11342</b>         | -0.06 | 7.61E-01 | -0.22 | 2.77E-01 |
| <b>G32185</b>         | 0.05  | 8.11E-01 | 0.22  | 2.77E-01 |
| <b>GAPDHP61</b>       | -0.03 | 8.86E-01 | 0.22  | 2.77E-01 |
| <b>GOLGA8A</b>        | -0.10 | 6.08E-01 | -0.22 | 2.77E-01 |
| <b>HEATR5A</b>        | 0.04  | 8.33E-01 | 0.22  | 2.77E-01 |
| <b>LINC01183</b>      | 0.23  | 2.29E-01 | -0.22 | 2.77E-01 |
| <b>MAP1LC3C</b>       | -0.08 | 6.75E-01 | -0.22 | 2.77E-01 |
| <b>MOB2</b>           | 0.07  | 7.22E-01 | 0.22  | 2.77E-01 |
| <b>RN7SKP124</b>      | 0.22  | 2.65E-01 | -0.22 | 2.77E-01 |
| <b>RN7SL188P</b>      | 0.08  | 6.85E-01 | -0.22 | 2.77E-01 |
| <b>RN7SL284P</b>      | -0.17 | 3.98E-01 | 0.22  | 2.77E-01 |
| <b>RNU5E-3P</b>       | -0.12 | 5.29E-01 | -0.22 | 2.77E-01 |

|               |       |          |       |          |
|---------------|-------|----------|-------|----------|
| RP11-181C3.1  | -0.38 | 4.90E-02 | 0.22  | 2.77E-01 |
| RP11-927P21.4 | -0.07 | 7.40E-01 | -0.22 | 2.77E-01 |
| RP5-1028K7.2  | 0.25  | 1.97E-01 | 0.22  | 2.77E-01 |
| TRAF3         | 0.09  | 6.38E-01 | 0.22  | 2.77E-01 |
| TRG-AS1       | 0.41  | 3.14E-02 | 0.22  | 2.77E-01 |
| UBE2H         | 0.11  | 5.94E-01 | 0.22  | 2.77E-01 |
| AL773572.7    | -0.32 | 9.62E-02 | -0.22 | 2.77E-01 |
| COX19         | 0.00  | 9.99E-01 | -0.22 | 2.77E-01 |
| KB-1090H4.2   | -0.08 | 6.70E-01 | -0.22 | 2.77E-01 |
| PKIB          | 0.21  | 2.74E-01 | -0.22 | 2.77E-01 |
| RNU6-681P     | 0.02  | 9.35E-01 | -0.22 | 2.77E-01 |
| RP11-528I4.2  | 0.09  | 6.64E-01 | -0.22 | 2.77E-01 |
| SORL1         | 0.05  | 8.10E-01 | -0.22 | 2.77E-01 |
| ASB16-AS1     | 0.24  | 2.09E-01 | 0.22  | 2.77E-01 |
| CTD-3184A7.4  | -0.13 | 5.07E-01 | 0.22  | 2.77E-01 |
| G34931        | -0.17 | 3.95E-01 | 0.22  | 2.77E-01 |
| HSPD1P3       | 0.41  | 3.24E-02 | 0.22  | 2.77E-01 |
| PARM1         | -0.06 | 7.43E-01 | 0.22  | 2.77E-01 |
| RNF112        | -0.33 | 8.92E-02 | 0.22  | 2.77E-01 |
| RP3-460G2.2   | -0.38 | 4.52E-02 | 0.22  | 2.77E-01 |
| RPL7P14       | 0.10  | 6.09E-01 | 0.22  | 2.77E-01 |
| TOB2P1        | -0.07 | 7.09E-01 | 0.22  | 2.77E-01 |
| UAP1L1        | 0.20  | 2.99E-01 | 0.22  | 2.77E-01 |
| CD82          | 0.18  | 3.61E-01 | 0.22  | 2.78E-01 |
| LZTS2         | 0.16  | 4.22E-01 | 0.22  | 2.78E-01 |
| RP11-264L1.3  | -0.03 | 8.70E-01 | 0.22  | 2.78E-01 |
| RP13-46H24.1  | -0.05 | 8.13E-01 | 0.22  | 2.78E-01 |
| SAYSD1        | 0.00  | 9.86E-01 | 0.22  | 2.78E-01 |
| TGM1          | 0.27  | 1.57E-01 | 0.22  | 2.78E-01 |
| ARRDC3-AS1    | -0.15 | 4.56E-01 | -0.22 | 2.78E-01 |
| DKFZP434I0714 | 0.16  | 4.12E-01 | -0.22 | 2.78E-01 |
| KLKB1         | -0.33 | 8.16E-02 | -0.22 | 2.78E-01 |
| LINC01481     | -0.37 | 5.50E-02 | -0.22 | 2.78E-01 |
| RP3-473B4.3   | 0.10  | 5.98E-01 | -0.22 | 2.78E-01 |
| UBOX5-AS1     | 0.07  | 7.41E-01 | -0.22 | 2.78E-01 |
| ZNF705E       | -0.10 | 5.98E-01 | -0.22 | 2.78E-01 |
| AC068282.3    | -0.51 | 5.74E-03 | 0.22  | 2.79E-01 |
| ARL6IP1       | 0.04  | 8.28E-01 | -0.22 | 2.79E-01 |
| DEPDC5        | 0.04  | 8.21E-01 | 0.22  | 2.79E-01 |
| HMGA1P4       | -0.06 | 7.66E-01 | -0.22 | 2.79E-01 |
| ITGB7         | -0.04 | 8.58E-01 | -0.22 | 2.79E-01 |
| LIPM          | -0.19 | 3.31E-01 | -0.22 | 2.79E-01 |
| PEX2          | 0.25  | 1.99E-01 | 0.22  | 2.79E-01 |
| PHKG2         | -0.17 | 3.86E-01 | 0.22  | 2.79E-01 |
| ROPN1B        | -0.34 | 7.32E-02 | -0.22 | 2.79E-01 |
| RP11-480A16.1 | 0.07  | 7.42E-01 | -0.22 | 2.79E-01 |
| RUFY3         | -0.16 | 4.12E-01 | -0.22 | 2.79E-01 |



|                 |       |          |       |          |
|-----------------|-------|----------|-------|----------|
| SSBP4           | 0.03  | 8.70E-01 | -0.22 | 2.79E-01 |
| TSPYL4          | -0.22 | 2.54E-01 | -0.22 | 2.79E-01 |
| Xbac-BPG283O16. | -0.10 | 6.24E-01 | -0.22 | 2.79E-01 |
| AC010148.1      | 0.28  | 1.46E-01 | -0.22 | 2.79E-01 |
| ADSS            | 0.22  | 2.57E-01 | -0.22 | 2.79E-01 |
| AP001628.6      | -0.20 | 3.10E-01 | -0.22 | 2.79E-01 |
| FAM185BP        | -0.18 | 3.48E-01 | -0.22 | 2.79E-01 |
| JMJD1C          | -0.13 | 4.98E-01 | -0.22 | 2.79E-01 |
| RN7SL330P       | -0.03 | 8.74E-01 | -0.22 | 2.79E-01 |
| RP11-56F10.3    | -0.20 | 3.01E-01 | -0.22 | 2.79E-01 |
| SERPINE1        | -0.11 | 5.67E-01 | -0.22 | 2.79E-01 |
| XLOC_001023     | -0.17 | 4.01E-01 | -0.22 | 2.79E-01 |
| XLOC_013461     | -0.13 | 5.05E-01 | -0.22 | 2.79E-01 |
| AP001596.6      | 0.35  | 6.70E-02 | 0.22  | 2.79E-01 |
| FAM3A           | 0.25  | 1.91E-01 | 0.22  | 2.79E-01 |
| RP11-161H23.10  | 0.14  | 4.84E-01 | 0.22  | 2.79E-01 |
| ZDHH4P1         | 0.04  | 8.53E-01 | 0.22  | 2.79E-01 |
| AFAP1           | -0.05 | 8.17E-01 | 0.22  | 2.80E-01 |
| ANKRD7          | 0.06  | 7.75E-01 | 0.22  | 2.80E-01 |
| P2RY6           | 0.14  | 4.82E-01 | 0.22  | 2.80E-01 |
| RNU6ATAC        | 0.30  | 1.19E-01 | 0.22  | 2.80E-01 |
| AC096669.3      | -0.17 | 4.01E-01 | -0.22 | 2.80E-01 |
| APLF            | -0.26 | 1.88E-01 | -0.22 | 2.80E-01 |
| CTA-276O3.4     | 0.09  | 6.50E-01 | -0.22 | 2.80E-01 |
| CTD-2132N18.4   | 0.21  | 2.83E-01 | -0.22 | 2.80E-01 |
| CTD-3088G3.4    | -0.23 | 2.36E-01 | -0.22 | 2.80E-01 |
| HSPE1P25        | -0.12 | 5.57E-01 | -0.22 | 2.80E-01 |
| LINC00528       | 0.28  | 1.49E-01 | -0.22 | 2.80E-01 |
| LINC01344       | 0.13  | 4.95E-01 | -0.22 | 2.80E-01 |
| MCM8-AS1        | -0.19 | 3.21E-01 | -0.22 | 2.80E-01 |
| MIR3136         | -0.16 | 4.16E-01 | -0.22 | 2.80E-01 |
| RN7SL262P       | 0.02  | 9.04E-01 | -0.22 | 2.80E-01 |
| RP11-1007O24.3  | -0.01 | 9.72E-01 | -0.22 | 2.80E-01 |
| RP11-474I11.7   | -0.20 | 2.99E-01 | -0.22 | 2.80E-01 |
| AL162431.1      | -0.05 | 7.82E-01 | -0.22 | 2.81E-01 |
| ATP11A-AS1      | 0.19  | 3.36E-01 | -0.22 | 2.81E-01 |
| BEND7           | -0.09 | 6.52E-01 | -0.22 | 2.81E-01 |
| BTBD1           | 0.18  | 3.66E-01 | -0.22 | 2.81E-01 |
| DLGAP1-AS2      | 0.04  | 8.52E-01 | 0.22  | 2.81E-01 |
| G7758           | 0.03  | 8.75E-01 | -0.22 | 2.81E-01 |
| GDE1            | 0.16  | 4.16E-01 | 0.22  | 2.81E-01 |
| LINC01494       | -0.28 | 1.53E-01 | 0.22  | 2.81E-01 |
| MIRLET7C        | -0.04 | 8.45E-01 | -0.22 | 2.81E-01 |
| OR2A7           | 0.34  | 8.05E-02 | -0.22 | 2.81E-01 |
| PRKRA           | 0.13  | 4.98E-01 | -0.22 | 2.81E-01 |
| REV1            | 0.11  | 5.75E-01 | -0.22 | 2.81E-01 |
| RNY3            | 0.21  | 2.87E-01 | 0.22  | 2.81E-01 |

|                |       |          |       |          |
|----------------|-------|----------|-------|----------|
| RP11-169K17.3  | -0.11 | 5.94E-01 | -0.22 | 2.81E-01 |
| RP11-181G12.2  | 0.20  | 3.05E-01 | -0.22 | 2.81E-01 |
| RP11-274B21.14 | -0.02 | 9.20E-01 | -0.22 | 2.81E-01 |
| RP11-295H24.4  | -0.52 | 4.25E-03 | -0.22 | 2.81E-01 |
| RP11-397O4.1   | -0.15 | 4.46E-01 | -0.22 | 2.81E-01 |
| RPL37P6        | 0.39  | 3.85E-02 | 0.22  | 2.81E-01 |
| SERPINB12      | 0.14  | 4.93E-01 | -0.22 | 2.81E-01 |
| TUBGCP3        | -0.15 | 4.46E-01 | -0.22 | 2.81E-01 |
| XKRX           | 0.07  | 7.21E-01 | 0.22  | 2.81E-01 |
| XLOC_005426    | 0.06  | 7.72E-01 | -0.22 | 2.81E-01 |
| ZNF750         | -0.01 | 9.61E-01 | 0.22  | 2.81E-01 |
| ACPT           | -0.18 | 3.60E-01 | -0.22 | 2.81E-01 |
| AIM1L          | 0.01  | 9.67E-01 | -0.22 | 2.81E-01 |
| BDP1           | 0.02  | 9.09E-01 | -0.22 | 2.81E-01 |
| CRISP2         | 0.17  | 3.97E-01 | -0.22 | 2.81E-01 |
| DIO3OS         | 0.01  | 9.58E-01 | -0.22 | 2.81E-01 |
| DNAJC25        | 0.15  | 4.60E-01 | -0.22 | 2.81E-01 |
| KB-1460A1.3    | -0.17 | 3.77E-01 | -0.22 | 2.81E-01 |
| OTOA           | 0.20  | 3.19E-01 | -0.22 | 2.81E-01 |
| PSG5           | 0.08  | 6.95E-01 | -0.22 | 2.81E-01 |
| RASSF9         | -0.12 | 5.57E-01 | -0.22 | 2.81E-01 |
| RP1-118J21.5   | 0.13  | 5.17E-01 | -0.22 | 2.81E-01 |
| RP11-283G6.3   | -0.19 | 3.21E-01 | -0.22 | 2.81E-01 |
| RP11-386B13.4  | -0.11 | 5.80E-01 | -0.22 | 2.81E-01 |
| RUVBL1-AS1     | -0.12 | 5.35E-01 | -0.22 | 2.81E-01 |
| SPARC          | -0.05 | 8.02E-01 | -0.22 | 2.81E-01 |
| TMOD2          | 0.01  | 9.79E-01 | -0.22 | 2.81E-01 |
| ZCRB1          | 0.04  | 8.58E-01 | -0.22 | 2.81E-01 |
| ZNF443         | 0.15  | 4.34E-01 | -0.22 | 2.81E-01 |
| AKR1B1P1       | -0.21 | 2.75E-01 | 0.22  | 2.81E-01 |
| CES2           | 0.36  | 5.88E-02 | 0.22  | 2.81E-01 |
| GCOM1          | 0.11  | 5.93E-01 | 0.22  | 2.81E-01 |
| LTBP1          | 0.15  | 4.57E-01 | 0.22  | 2.81E-01 |
| MIR141         | 0.26  | 1.76E-01 | 0.22  | 2.81E-01 |
| MYCN           | 0.43  | 2.16E-02 | 0.22  | 2.81E-01 |
| RNU5A-1        | 0.13  | 5.07E-01 | 0.22  | 2.81E-01 |
| RNU6-9         | 0.03  | 8.66E-01 | 0.22  | 2.81E-01 |
| RNY3P1         | -0.10 | 6.20E-01 | 0.22  | 2.81E-01 |
| SPATA42        | 0.17  | 3.98E-01 | 0.22  | 2.81E-01 |
| SPRR1A         | 0.13  | 5.03E-01 | 0.22  | 2.81E-01 |
| TAS2R50        | 0.14  | 4.90E-01 | 0.22  | 2.81E-01 |
| U47924.27      | -0.04 | 8.52E-01 | 0.22  | 2.81E-01 |
| ADIPOR2        | 0.14  | 4.69E-01 | 0.21  | 2.82E-01 |
| AP001468.1     | -0.12 | 5.35E-01 | -0.21 | 2.82E-01 |
| EEF1GP4        | 0.03  | 8.78E-01 | -0.21 | 2.82E-01 |
| EXOSC6         | 0.23  | 2.29E-01 | -0.21 | 2.82E-01 |
| FRG1JP         | -0.17 | 3.94E-01 | -0.21 | 2.82E-01 |

|                      |       |          |       |          |
|----------------------|-------|----------|-------|----------|
| <b>G11188</b>        | 0.00  | 9.86E-01 | -0.21 | 2.82E-01 |
| <b>GLYCK-AS1</b>     | 0.06  | 7.63E-01 | 0.21  | 2.82E-01 |
| <b>PTPRU</b>         | -0.10 | 6.30E-01 | -0.21 | 2.82E-01 |
| <b>RAI1</b>          | -0.09 | 6.46E-01 | -0.21 | 2.82E-01 |
| <b>RN7SL610P</b>     | -0.07 | 7.41E-01 | -0.21 | 2.82E-01 |
| <b>RNU6-1054P</b>    | -0.09 | 6.41E-01 | -0.21 | 2.82E-01 |
| <b>RP1-288L1.4</b>   | -0.28 | 1.44E-01 | 0.21  | 2.82E-01 |
| <b>RP11-143I21.1</b> | -0.10 | 6.13E-01 | -0.21 | 2.82E-01 |
| <b>RP11-158G18.1</b> | 0.08  | 6.81E-01 | -0.21 | 2.82E-01 |
| <b>RP11-266K4.13</b> | -0.30 | 1.16E-01 | 0.21  | 2.82E-01 |
| <b>RP11-305D15.8</b> | 0.21  | 2.89E-01 | -0.21 | 2.82E-01 |
| <b>RP11-423O2.1</b>  | -0.31 | 1.04E-01 | -0.21 | 2.82E-01 |
| <b>RP11-667M19.1</b> | -0.11 | 5.92E-01 | -0.21 | 2.82E-01 |
| <b>RP6-191P20.3</b>  | -0.12 | 5.37E-01 | -0.21 | 2.82E-01 |
| <b>UBE2V1</b>        | -0.19 | 3.26E-01 | -0.21 | 2.82E-01 |
| <b>XLOC_005371</b>   | -0.50 | 7.18E-03 | -0.21 | 2.82E-01 |
| <b>AF230666.2</b>    | -0.03 | 8.79E-01 | -0.21 | 2.83E-01 |
| <b>CHIT1</b>         | 0.33  | 8.73E-02 | 0.21  | 2.83E-01 |
| <b>FGL2</b>          | -0.06 | 7.48E-01 | -0.21 | 2.83E-01 |
| <b>JADE2</b>         | -0.05 | 8.07E-01 | 0.21  | 2.83E-01 |
| <b>MIR3685</b>       | -0.12 | 5.30E-01 | -0.21 | 2.83E-01 |
| <b>NPIP7</b>         | -0.21 | 2.78E-01 | -0.21 | 2.83E-01 |
| <b>NUPL2</b>         | 0.17  | 3.89E-01 | -0.21 | 2.83E-01 |
| <b>RBM8B</b>         | 0.07  | 7.37E-01 | -0.21 | 2.83E-01 |
| <b>RCBTB2</b>        | 0.05  | 7.84E-01 | 0.21  | 2.83E-01 |
| <b>RNA5SP203</b>     | 0.11  | 5.70E-01 | -0.21 | 2.83E-01 |
| <b>RNU6-1253P</b>    | -0.06 | 7.46E-01 | 0.21  | 2.83E-01 |
| <b>RNU6ATAC27P</b>   | 0.14  | 4.83E-01 | 0.21  | 2.83E-01 |
| <b>RP1-91J24.3</b>   | 0.01  | 9.54E-01 | 0.21  | 2.83E-01 |
| <b>RP11-108M11.3</b> | -0.05 | 8.13E-01 | 0.21  | 2.83E-01 |
| <b>RP11-219B17.3</b> | -0.30 | 1.26E-01 | -0.21 | 2.83E-01 |
| <b>RP11-545A16.1</b> | 0.02  | 9.21E-01 | -0.21 | 2.83E-01 |
| <b>ANGEL2</b>        | 0.04  | 8.40E-01 | -0.21 | 2.84E-01 |
| <b>ANKRD36</b>       | -0.15 | 4.59E-01 | -0.21 | 2.84E-01 |
| <b>C5orf49</b>       | -0.37 | 5.29E-02 | -0.21 | 2.84E-01 |
| <b>CDH4</b>          | -0.21 | 2.91E-01 | 0.21  | 2.84E-01 |
| <b>LINC00365</b>     | -0.20 | 3.06E-01 | -0.21 | 2.84E-01 |
| <b>LINC00707</b>     | -0.15 | 4.45E-01 | 0.21  | 2.84E-01 |
| <b>MLLT6</b>         | 0.14  | 4.72E-01 | 0.21  | 2.84E-01 |
| <b>NAPA</b>          | 0.20  | 3.20E-01 | 0.21  | 2.84E-01 |
| <b>RP11-109A6.3</b>  | 0.09  | 6.63E-01 | 0.21  | 2.84E-01 |
| <b>RP11-118E18.4</b> | 0.33  | 9.01E-02 | 0.21  | 2.84E-01 |
| <b>ST14</b>          | 0.40  | 3.66E-02 | 0.21  | 2.84E-01 |
| <b>TBC1D9B</b>       | 0.24  | 2.28E-01 | 0.21  | 2.84E-01 |
| <b>ZBTB49</b>        | 0.02  | 9.06E-01 | -0.21 | 2.84E-01 |
| <b>ABHD11</b>        | -0.29 | 1.36E-01 | -0.21 | 2.84E-01 |
| <b>ABHD2</b>         | 0.16  | 4.26E-01 | -0.21 | 2.84E-01 |

|               |       |          |       |          |
|---------------|-------|----------|-------|----------|
| APIP          | -0.06 | 7.77E-01 | -0.21 | 2.84E-01 |
| C10orf67      | 0.11  | 5.68E-01 | -0.21 | 2.84E-01 |
| C16orf54      | 0.15  | 4.37E-01 | -0.21 | 2.84E-01 |
| CDCA4P4       | -0.07 | 7.16E-01 | -0.21 | 2.84E-01 |
| CTC-338M12.1  | -0.27 | 1.63E-01 | -0.21 | 2.84E-01 |
| CTD-2184C24.2 | 0.06  | 7.53E-01 | -0.21 | 2.84E-01 |
| CTD-3216D2.5  | 0.29  | 1.33E-01 | -0.21 | 2.84E-01 |
| G7791         | -0.15 | 4.54E-01 | -0.21 | 2.84E-01 |
| KRT8P3        | 0.12  | 5.41E-01 | -0.21 | 2.84E-01 |
| LGALS2        | 0.08  | 6.91E-01 | 0.21  | 2.84E-01 |
| LRRC2         | -0.27 | 1.58E-01 | -0.21 | 2.84E-01 |
| LRRC31        | -0.28 | 1.51E-01 | -0.21 | 2.84E-01 |
| MEMO1         | 0.07  | 7.05E-01 | -0.21 | 2.84E-01 |
| MTCH1         | 0.14  | 4.72E-01 | -0.21 | 2.84E-01 |
| OTUD3         | -0.21 | 2.95E-01 | -0.21 | 2.84E-01 |
| PSG9          | 0.09  | 6.42E-01 | -0.21 | 2.84E-01 |
| RAB28P5       | 0.12  | 5.53E-01 | 0.21  | 2.84E-01 |
| RP11-179A10.1 | 0.09  | 6.62E-01 | 0.21  | 2.84E-01 |
| RP11-430K21.2 | -0.19 | 3.27E-01 | 0.21  | 2.84E-01 |
| RPH3AL        | 0.18  | 3.58E-01 | -0.21 | 2.84E-01 |
| SLC44A4       | 0.23  | 2.44E-01 | -0.21 | 2.84E-01 |
| SNAI3         | 0.06  | 7.59E-01 | 0.21  | 2.84E-01 |
| SYT14P1       | -0.04 | 8.40E-01 | -0.21 | 2.84E-01 |
| ZFP92         | 0.31  | 1.04E-01 | 0.21  | 2.84E-01 |
| AC017060.1    | -0.16 | 4.15E-01 | 0.21  | 2.85E-01 |
| AGAP2-AS1     | 0.29  | 1.41E-01 | 0.21  | 2.85E-01 |
| BCKDHA        | 0.09  | 6.56E-01 | -0.21 | 2.85E-01 |
| C1orf140      | 0.01  | 9.53E-01 | -0.21 | 2.85E-01 |
| ENY2          | 0.06  | 7.53E-01 | -0.21 | 2.85E-01 |
| G31721        | 0.34  | 7.92E-02 | 0.21  | 2.85E-01 |
| GATSL3        | -0.04 | 8.50E-01 | 0.21  | 2.85E-01 |
| HLA-V         | 0.15  | 4.44E-01 | 0.21  | 2.85E-01 |
| HNRNPA3P5     | -0.06 | 7.68E-01 | 0.21  | 2.85E-01 |
| JPH3          | -0.10 | 5.95E-01 | -0.21 | 2.85E-01 |
| KIF14         | 0.13  | 5.14E-01 | 0.21  | 2.85E-01 |
| LINC01254     | 0.16  | 4.22E-01 | -0.21 | 2.85E-01 |
| MIR151B       | -0.13 | 4.96E-01 | -0.21 | 2.85E-01 |
| NBR2          | 0.00  | 9.83E-01 | 0.21  | 2.85E-01 |
| NFKBIE        | 0.04  | 8.35E-01 | 0.21  | 2.85E-01 |
| NXPH4         | 0.30  | 1.26E-01 | 0.21  | 2.85E-01 |
| PTPRJ         | 0.21  | 2.88E-01 | 0.21  | 2.85E-01 |
| RN7SL270P     | 0.19  | 3.26E-01 | 0.21  | 2.85E-01 |
| RNU6-6P       | -0.17 | 3.91E-01 | 0.21  | 2.85E-01 |
| RP1-68D18.3   | -0.17 | 3.99E-01 | -0.21 | 2.85E-01 |
| RP11-34A14.3  | 0.13  | 5.09E-01 | -0.21 | 2.85E-01 |
| RP11-376O6.2  | -0.08 | 6.90E-01 | -0.21 | 2.85E-01 |
| RP3-483K16.4  | 0.22  | 2.66E-01 | 0.21  | 2.85E-01 |

|                       |       |          |       |          |
|-----------------------|-------|----------|-------|----------|
| <b>RPL23AP92</b>      | 0.06  | 7.57E-01 | 0.21  | 2.85E-01 |
| <b>ACD</b>            | -0.24 | 2.16E-01 | 0.21  | 2.86E-01 |
| <b>ALOX15</b>         | 0.05  | 7.86E-01 | 0.21  | 2.86E-01 |
| <b>AMPD1</b>          | -0.21 | 2.93E-01 | -0.21 | 2.86E-01 |
| <b>BTK</b>            | 0.03  | 8.65E-01 | 0.21  | 2.86E-01 |
| <b>DIDO1</b>          | -0.06 | 7.45E-01 | -0.21 | 2.86E-01 |
| <b>EGFR</b>           | 0.01  | 9.69E-01 | -0.21 | 2.86E-01 |
| <b>ERN2</b>           | -0.34 | 7.32E-02 | -0.21 | 2.86E-01 |
| <b>GRID1</b>          | -0.09 | 6.67E-01 | -0.21 | 2.86E-01 |
| <b>IFT27</b>          | -0.19 | 3.37E-01 | -0.21 | 2.86E-01 |
| <b>LINC00589</b>      | -0.30 | 1.20E-01 | 0.21  | 2.86E-01 |
| <b>PLEKHA1</b>        | 0.04  | 8.40E-01 | -0.21 | 2.86E-01 |
| <b>PRKCA</b>          | 0.00  | 9.81E-01 | -0.21 | 2.86E-01 |
| <b>PRRT3-AS1</b>      | 0.34  | 7.72E-02 | 0.21  | 2.86E-01 |
| <b>RNU6-736P</b>      | -0.05 | 7.82E-01 | 0.21  | 2.86E-01 |
| <b>RP11-100N20.1</b>  | 0.06  | 7.59E-01 | -0.21 | 2.86E-01 |
| <b>RP11-521B24.5</b>  | -0.14 | 4.91E-01 | -0.21 | 2.86E-01 |
| <b>RP4-694B14.8</b>   | 0.03  | 8.63E-01 | -0.21 | 2.86E-01 |
| <b>RP5-916O11.2</b>   | -0.28 | 1.46E-01 | 0.21  | 2.86E-01 |
| <b>TMPRSS9</b>        | -0.12 | 5.42E-01 | -0.21 | 2.86E-01 |
| <b>WNT16</b>          | 0.38  | 4.44E-02 | 0.21  | 2.86E-01 |
| <b>AC017028.7</b>     | -0.16 | 4.29E-01 | -0.21 | 2.86E-01 |
| <b>AC087491.2</b>     | -0.15 | 4.39E-01 | -0.21 | 2.86E-01 |
| <b>C9orf116</b>       | 0.04  | 8.25E-01 | -0.21 | 2.86E-01 |
| <b>C9orf66</b>        | 0.15  | 4.34E-01 | -0.21 | 2.86E-01 |
| <b>CBWD1</b>          | 0.22  | 2.56E-01 | -0.21 | 2.86E-01 |
| <b>CERS4</b>          | 0.06  | 7.49E-01 | 0.21  | 2.86E-01 |
| <b>CTAG2</b>          | -0.07 | 7.20E-01 | -0.21 | 2.86E-01 |
| <b>FLNC</b>           | 0.16  | 4.17E-01 | 0.21  | 2.86E-01 |
| <b>GRIN2C</b>         | -0.01 | 9.40E-01 | -0.21 | 2.86E-01 |
| <b>HOXD11</b>         | 0.20  | 2.99E-01 | -0.21 | 2.86E-01 |
| <b>HSPA8P19</b>       | -0.36 | 6.37E-02 | -0.21 | 2.86E-01 |
| <b>MRAP</b>           | -0.02 | 9.32E-01 | -0.21 | 2.86E-01 |
| <b>MTERF1</b>         | 0.17  | 3.89E-01 | -0.21 | 2.86E-01 |
| <b>NMD3P1</b>         | -0.40 | 3.58E-02 | -0.21 | 2.86E-01 |
| <b>PPP1R12C</b>       | -0.06 | 7.72E-01 | 0.21  | 2.86E-01 |
| <b>PRDM16</b>         | -0.21 | 2.90E-01 | -0.21 | 2.86E-01 |
| <b>RANBP3</b>         | -0.13 | 5.19E-01 | 0.21  | 2.86E-01 |
| <b>RN7SL208P</b>      | -0.05 | 7.99E-01 | 0.21  | 2.86E-01 |
| <b>RP11-20I23.5</b>   | -0.31 | 1.09E-01 | -0.21 | 2.86E-01 |
| <b>RP11-216L13.19</b> | -0.32 | 9.42E-02 | -0.21 | 2.86E-01 |
| <b>RP11-351I21.6</b>  | 0.28  | 1.52E-01 | 0.21  | 2.86E-01 |
| <b>RP11-378J18.9</b>  | -0.06 | 7.66E-01 | 0.21  | 2.86E-01 |
| <b>RP11-534L20.5</b>  | 0.12  | 5.52E-01 | 0.21  | 2.86E-01 |
| <b>RP11-76G10.1</b>   | -0.29 | 1.37E-01 | -0.21 | 2.86E-01 |
| <b>SLC23A1</b>        | 0.27  | 1.63E-01 | -0.21 | 2.86E-01 |
| <b>SNN</b>            | 0.08  | 6.97E-01 | 0.21  | 2.86E-01 |

|               |       |          |       |          |
|---------------|-------|----------|-------|----------|
| SNORD91A      | 0.16  | 4.10E-01 | 0.21  | 2.86E-01 |
| VSIG10L       | 0.36  | 6.22E-02 | 0.21  | 2.86E-01 |
| ACSL6         | -0.09 | 6.67E-01 | -0.21 | 2.87E-01 |
| ALG1L11P      | -0.08 | 6.78E-01 | 0.21  | 2.87E-01 |
| AP001432.14   | 0.13  | 5.15E-01 | -0.21 | 2.87E-01 |
| ARHGEF3-AS1   | -0.08 | 6.73E-01 | 0.21  | 2.87E-01 |
| C16orf87      | -0.02 | 9.34E-01 | -0.21 | 2.87E-01 |
| DACH1         | -0.23 | 2.48E-01 | -0.21 | 2.87E-01 |
| DCLRE1B       | 0.05  | 8.04E-01 | -0.21 | 2.87E-01 |
| DKK4          | 0.52  | 4.67E-03 | 0.21  | 2.87E-01 |
| EIF4EBP1P1    | 0.16  | 4.06E-01 | 0.21  | 2.87E-01 |
| ENG           | -0.10 | 5.99E-01 | 0.21  | 2.87E-01 |
| G2E3          | -0.01 | 9.44E-01 | -0.21 | 2.87E-01 |
| G30001        | -0.12 | 5.46E-01 | -0.21 | 2.87E-01 |
| LLGL1         | 0.34  | 7.34E-02 | 0.21  | 2.87E-01 |
| MIR4669       | 0.14  | 4.64E-01 | 0.21  | 2.87E-01 |
| PAXIP1-AS1    | -0.10 | 6.11E-01 | 0.21  | 2.87E-01 |
| RNU2-61P      | 0.16  | 4.09E-01 | 0.21  | 2.87E-01 |
| RNU4-35P      | 0.12  | 5.44E-01 | -0.21 | 2.87E-01 |
| RP11-578F21.2 | -0.23 | 2.36E-01 | -0.21 | 2.87E-01 |
| RP11-819M15.1 | -0.14 | 4.69E-01 | 0.21  | 2.87E-01 |
| RPEP4         | 0.30  | 1.20E-01 | -0.21 | 2.87E-01 |
| RPS15AP11     | -0.09 | 6.32E-01 | 0.21  | 2.87E-01 |
| ST6GALNAC6    | -0.21 | 2.75E-01 | 0.21  | 2.87E-01 |
| STAG3L1       | -0.37 | 5.29E-02 | -0.21 | 2.87E-01 |
| TRPM2         | 0.26  | 1.82E-01 | 0.21  | 2.87E-01 |
| ZNF180        | 0.01  | 9.61E-01 | -0.21 | 2.87E-01 |
| AC013461.1    | -0.02 | 9.33E-01 | -0.21 | 2.88E-01 |
| AC145676.2    | -0.02 | 9.08E-01 | -0.21 | 2.88E-01 |
| ATOH7         | 0.12  | 5.37E-01 | -0.21 | 2.88E-01 |
| BUD13         | -0.09 | 6.64E-01 | -0.21 | 2.88E-01 |
| C19orf81      | 0.08  | 6.99E-01 | -0.21 | 2.88E-01 |
| FAM212B-AS1   | -0.32 | 9.30E-02 | -0.21 | 2.88E-01 |
| HCG27         | 0.17  | 3.74E-01 | -0.21 | 2.88E-01 |
| KCNIP2-AS1    | -0.10 | 5.95E-01 | -0.21 | 2.88E-01 |
| MATR3         | 0.09  | 6.36E-01 | -0.21 | 2.88E-01 |
| RP11-1B20.1   | -0.39 | 3.98E-02 | -0.21 | 2.88E-01 |
| RP11-346M5.1  | 0.13  | 4.96E-01 | -0.21 | 2.88E-01 |
| RP11-570L14.1 | -0.15 | 4.43E-01 | -0.21 | 2.88E-01 |
| RPL9P32       | -0.16 | 4.20E-01 | -0.21 | 2.88E-01 |
| CPEB1-AS1     | -0.12 | 5.51E-01 | 0.21  | 2.88E-01 |
| CRELD1        | -0.07 | 7.20E-01 | 0.21  | 2.88E-01 |
| DET1          | 0.08  | 6.90E-01 | 0.21  | 2.88E-01 |
| DNMBP         | -0.14 | 4.76E-01 | 0.21  | 2.88E-01 |
| HOXC8         | -0.20 | 3.04E-01 | 0.21  | 2.88E-01 |
| LINC01006     | -0.15 | 4.34E-01 | 0.21  | 2.88E-01 |
| LINC01426     | -0.05 | 7.87E-01 | 0.21  | 2.88E-01 |

|               |       |          |       |          |
|---------------|-------|----------|-------|----------|
| PLEK2         | 0.26  | 1.77E-01 | 0.21  | 2.88E-01 |
| RASIP1        | 0.55  | 2.30E-03 | 0.21  | 2.88E-01 |
| RN7SL359P     | 0.06  | 7.67E-01 | 0.21  | 2.88E-01 |
| RP11-324E6.6  | -0.02 | 9.26E-01 | 0.21  | 2.88E-01 |
| RP11-818F20.5 | 0.32  | 1.02E-01 | 0.21  | 2.88E-01 |
| SNORD67       | 0.23  | 2.48E-01 | 0.21  | 2.88E-01 |
| AMPD2         | -0.04 | 8.45E-01 | 0.21  | 2.88E-01 |
| ANXA1         | -0.04 | 8.31E-01 | -0.21 | 2.88E-01 |
| ARMC5         | 0.10  | 5.95E-01 | 0.21  | 2.88E-01 |
| ATP12A        | 0.34  | 7.72E-02 | 0.21  | 2.88E-01 |
| CCNG2         | 0.26  | 1.77E-01 | 0.21  | 2.88E-01 |
| CTD-2308G16.1 | 0.09  | 6.41E-01 | -0.21 | 2.88E-01 |
| FAM27E3       | -0.42 | 2.61E-02 | -0.21 | 2.88E-01 |
| INHBE         | 0.00  | 9.93E-01 | 0.21  | 2.88E-01 |
| INTS1         | 0.20  | 2.99E-01 | 0.21  | 2.88E-01 |
| MICALCL       | -0.23 | 2.38E-01 | -0.21 | 2.88E-01 |
| OR2T2         | -0.10 | 6.12E-01 | -0.21 | 2.88E-01 |
| PNP           | 0.31  | 1.07E-01 | 0.21  | 2.88E-01 |
| RNF146        | -0.04 | 8.36E-01 | -0.21 | 2.88E-01 |
| RP11-388C12.5 | -0.12 | 5.49E-01 | 0.21  | 2.88E-01 |
| RP11-819C21.1 | 0.07  | 7.18E-01 | -0.21 | 2.88E-01 |
| TRAIP         | 0.38  | 4.52E-02 | -0.21 | 2.88E-01 |
| UBE2V1P1      | 0.03  | 8.95E-01 | 0.21  | 2.88E-01 |
| XLOC_009777   | -0.16 | 4.12E-01 | -0.21 | 2.88E-01 |
| AC005481.5    | 0.34  | 7.66E-02 | 0.21  | 2.89E-01 |
| CCDC177       | -0.02 | 9.15E-01 | -0.21 | 2.89E-01 |
| COG8          | -0.18 | 3.63E-01 | 0.21  | 2.89E-01 |
| DACH2         | 0.37  | 5.21E-02 | -0.21 | 2.89E-01 |
| DDX11L1       | -0.11 | 5.70E-01 | -0.21 | 2.89E-01 |
| DIRAS3        | -0.05 | 8.03E-01 | -0.21 | 2.89E-01 |
| EXOC5         | 0.09  | 6.61E-01 | -0.21 | 2.89E-01 |
| ITPR3         | -0.09 | 6.56E-01 | 0.21  | 2.89E-01 |
| KLRAP1        | -0.08 | 6.91E-01 | -0.21 | 2.89E-01 |
| LINC01010     | 0.23  | 2.35E-01 | 0.21  | 2.89E-01 |
| LINC01170     | 0.13  | 5.01E-01 | -0.21 | 2.89E-01 |
| MIPEPP3       | 0.08  | 7.00E-01 | -0.21 | 2.89E-01 |
| RP11-11M20.4  | -0.64 | 2.77E-04 | -0.21 | 2.89E-01 |
| RP11-151A6.6  | -0.02 | 9.25E-01 | -0.21 | 2.89E-01 |
| RP11-480G7.2  | 0.07  | 7.42E-01 | 0.21  | 2.89E-01 |
| RP11-568J23.8 | -0.14 | 4.65E-01 | -0.21 | 2.89E-01 |
| RP11-703I16.3 | 0.33  | 8.37E-02 | 0.21  | 2.89E-01 |
| RP11-806L2.6  | -0.12 | 5.55E-01 | -0.21 | 2.89E-01 |
| RP3-322G13.7  | -0.05 | 7.88E-01 | -0.21 | 2.89E-01 |
| SCARNA5       | -0.30 | 1.15E-01 | 0.21  | 2.89E-01 |
| SIK1          | -0.11 | 5.81E-01 | 0.21  | 2.89E-01 |
| SLC18A3       | 0.00  | 9.80E-01 | 0.21  | 2.89E-01 |
| TMEM54        | 0.27  | 1.68E-01 | 0.21  | 2.89E-01 |

|               |       |          |       |          |
|---------------|-------|----------|-------|----------|
| ZNF663P       | -0.15 | 4.49E-01 | -0.21 | 2.89E-01 |
| ZSCAN25       | -0.01 | 9.57E-01 | 0.21  | 2.89E-01 |
| CASP8         | 0.36  | 5.92E-02 | 0.21  | 2.90E-01 |
| MPV17L2       | 0.13  | 5.08E-01 | 0.21  | 2.90E-01 |
| PAF1          | 0.12  | 5.32E-01 | 0.21  | 2.90E-01 |
| PRRG1         | 0.17  | 3.82E-01 | -0.21 | 2.90E-01 |
| PRRT4         | 0.20  | 3.06E-01 | -0.21 | 2.90E-01 |
| QTRT1         | 0.19  | 3.38E-01 | 0.21  | 2.90E-01 |
| RP11-394I13.3 | -0.12 | 5.38E-01 | 0.21  | 2.90E-01 |
| RP11-507K13.6 | -0.25 | 1.98E-01 | -0.21 | 2.90E-01 |
| RP11-61K9.2   | 0.15  | 4.39E-01 | 0.21  | 2.90E-01 |
| RP11-64C12.1  | -0.10 | 5.97E-01 | -0.21 | 2.90E-01 |
| RPL23AP25     | 0.11  | 5.66E-01 | -0.21 | 2.90E-01 |
| TBX2          | -0.22 | 2.66E-01 | 0.21  | 2.90E-01 |
| TMPRSS11CP    | 0.02  | 9.18E-01 | 0.21  | 2.90E-01 |
| WASH7P        | -0.37 | 5.54E-02 | -0.21 | 2.90E-01 |
| XLOC_001134   | -0.29 | 1.36E-01 | -0.21 | 2.90E-01 |
| ZNF341        | -0.04 | 8.59E-01 | 0.21  | 2.90E-01 |
| CICP22        | -0.22 | 2.68E-01 | -0.21 | 2.91E-01 |
| DHRS4L2       | -0.31 | 1.10E-01 | 0.21  | 2.91E-01 |
| E2F7          | -0.11 | 5.68E-01 | -0.21 | 2.91E-01 |
| EDRF1-AS1     | -0.13 | 5.01E-01 | -0.21 | 2.91E-01 |
| GOLGA6L9      | -0.25 | 1.98E-01 | -0.21 | 2.91E-01 |
| GORAB         | -0.02 | 9.04E-01 | -0.21 | 2.91E-01 |
| IGSF10        | -0.14 | 4.72E-01 | -0.21 | 2.91E-01 |
| ITGB4         | 0.14  | 4.69E-01 | 0.21  | 2.91E-01 |
| LINC01485     | -0.01 | 9.71E-01 | -0.21 | 2.91E-01 |
| NES           | 0.28  | 1.43E-01 | 0.21  | 2.91E-01 |
| RP11-404G16.2 | -0.07 | 7.36E-01 | 0.21  | 2.91E-01 |
| RP11-439K3.1  | 0.11  | 5.63E-01 | -0.21 | 2.91E-01 |
| SERPIND1      | 0.03  | 8.66E-01 | -0.21 | 2.91E-01 |
| SLCO5A1       | 0.08  | 7.02E-01 | 0.21  | 2.91E-01 |
| TEX264        | 0.34  | 7.72E-02 | 0.21  | 2.91E-01 |
| TRAFD1        | 0.19  | 3.21E-01 | 0.21  | 2.91E-01 |
| ZNF695        | 0.06  | 7.76E-01 | 0.21  | 2.91E-01 |
| B4GALT7       | 0.05  | 7.95E-01 | 0.21  | 2.91E-01 |
| CTD-2145A24.3 | -0.09 | 6.52E-01 | -0.21 | 2.91E-01 |
| EGFLAM-AS4    | 0.07  | 7.19E-01 | 0.21  | 2.91E-01 |
| FAM168A       | -0.28 | 1.48E-01 | 0.21  | 2.91E-01 |
| FOCAD-AS1     | -0.16 | 4.17E-01 | -0.21 | 2.91E-01 |
| GSE1          | -0.24 | 2.22E-01 | -0.21 | 2.91E-01 |
| IQCE          | 0.00  | 9.85E-01 | -0.21 | 2.91E-01 |
| MEIG1         | 0.47  | 1.14E-02 | 0.21  | 2.91E-01 |
| MTFR1L        | 0.05  | 8.10E-01 | 0.21  | 2.91E-01 |
| PIGS          | 0.14  | 4.77E-01 | 0.21  | 2.91E-01 |
| RP11-1057B6.1 | -0.27 | 1.64E-01 | -0.21 | 2.91E-01 |
| RP11-285G1.2  | -0.13 | 5.25E-01 | -0.21 | 2.91E-01 |



|               |       |          |       |          |
|---------------|-------|----------|-------|----------|
| RP11-327O17.2 | -0.35 | 6.94E-02 | -0.21 | 2.91E-01 |
| RP11-46D6.1   | -0.08 | 6.73E-01 | 0.21  | 2.91E-01 |
| RP11-524F11.1 | 0.12  | 5.54E-01 | 0.21  | 2.91E-01 |
| RP11-618N24.1 | -0.06 | 7.81E-01 | -0.21 | 2.91E-01 |
| RPL23AP67     | 0.05  | 8.12E-01 | -0.21 | 2.91E-01 |
| TNRC18P1      | 0.23  | 2.32E-01 | 0.21  | 2.91E-01 |
| VWC2          | -0.05 | 7.82E-01 | 0.21  | 2.91E-01 |
| XIRP1         | 0.30  | 1.17E-01 | -0.21 | 2.91E-01 |
| XLOC_005280   | 0.28  | 1.53E-01 | 0.21  | 2.91E-01 |
| ZBED2         | 0.09  | 6.52E-01 | 0.21  | 2.91E-01 |
| ZNF630        | -0.05 | 8.03E-01 | 0.21  | 2.91E-01 |
| AC092839.4    | 0.06  | 7.47E-01 | -0.21 | 2.92E-01 |
| AC108066.1    | 0.04  | 8.55E-01 | -0.21 | 2.92E-01 |
| ADAM11        | -0.01 | 9.49E-01 | 0.21  | 2.92E-01 |
| CALM2P2       | -0.10 | 6.05E-01 | -0.21 | 2.92E-01 |
| CCR2          | 0.13  | 5.14E-01 | 0.21  | 2.92E-01 |
| CH507-9B2.3   | 0.04  | 8.50E-01 | -0.21 | 2.92E-01 |
| CTD-2514C3.1  | -0.18 | 3.57E-01 | -0.21 | 2.92E-01 |
| DNAJC6        | -0.08 | 6.70E-01 | -0.21 | 2.92E-01 |
| EIF3EP1       | 0.06  | 7.57E-01 | 0.21  | 2.92E-01 |
| G3616         | -0.13 | 4.93E-01 | -0.21 | 2.92E-01 |
| G6795         | -0.12 | 5.29E-01 | 0.21  | 2.92E-01 |
| KCNJ5         | -0.17 | 3.73E-01 | 0.21  | 2.92E-01 |
| KLC3          | -0.22 | 2.69E-01 | -0.21 | 2.92E-01 |
| MTND5P25      | 0.05  | 8.03E-01 | 0.21  | 2.92E-01 |
| NUP210        | -0.10 | 6.24E-01 | 0.21  | 2.92E-01 |
| PIH1D1        | 0.16  | 4.06E-01 | 0.21  | 2.92E-01 |
| PLA2G10       | -0.10 | 6.27E-01 | 0.21  | 2.92E-01 |
| RNF225        | 0.29  | 1.36E-01 | 0.21  | 2.92E-01 |
| RNPS1P1       | -0.27 | 1.63E-01 | -0.21 | 2.92E-01 |
| RNU6-1262P    | -0.02 | 9.12E-01 | -0.21 | 2.92E-01 |
| RP11-10O17.1  | 0.06  | 7.60E-01 | -0.21 | 2.92E-01 |
| RP11-13J10.1  | 0.06  | 7.68E-01 | -0.21 | 2.92E-01 |
| RP11-554D14.6 | 0.33  | 8.75E-02 | 0.21  | 2.92E-01 |
| YJEFN3        | -0.18 | 3.66E-01 | -0.21 | 2.92E-01 |
| ZNF12         | -0.16 | 4.09E-01 | -0.21 | 2.92E-01 |
| AC007566.10   | -0.33 | 8.42E-02 | -0.21 | 2.93E-01 |
| ARHGDIB       | 0.13  | 5.03E-01 | 0.21  | 2.93E-01 |
| CEP135        | 0.19  | 3.21E-01 | -0.21 | 2.93E-01 |
| CTD-2524L6.3  | 0.12  | 5.43E-01 | -0.21 | 2.93E-01 |
| KIAA0319L     | 0.09  | 6.49E-01 | 0.21  | 2.93E-01 |
| MED30         | -0.03 | 8.82E-01 | -0.21 | 2.93E-01 |
| MKS1          | -0.01 | 9.72E-01 | 0.21  | 2.93E-01 |
| PTAR1         | 0.05  | 8.14E-01 | -0.21 | 2.93E-01 |
| PTGIS         | -0.09 | 6.55E-01 | 0.21  | 2.93E-01 |
| RHOT1         | 0.02  | 9.02E-01 | -0.21 | 2.93E-01 |
| RP11-310P5.1  | -0.07 | 7.33E-01 | -0.21 | 2.93E-01 |

|                      |       |          |       |          |
|----------------------|-------|----------|-------|----------|
| <b>RP11-367G6.3</b>  | 0.10  | 6.29E-01 | -0.21 | 2.93E-01 |
| <b>RP11-462G2.2</b>  | -0.11 | 5.77E-01 | 0.21  | 2.93E-01 |
| <b>RP4-669P10.16</b> | -0.02 | 9.05E-01 | -0.21 | 2.93E-01 |
| <b>SMIM8</b>         | -0.25 | 1.98E-01 | -0.21 | 2.93E-01 |
| <b>SNX8</b>          | -0.12 | 5.48E-01 | 0.21  | 2.93E-01 |
| <b>SOWAHC</b>        | 0.22  | 2.71E-01 | 0.21  | 2.93E-01 |
| <b>TEX41</b>         | -0.51 | 6.05E-03 | -0.21 | 2.93E-01 |
| <b>AC010731.4</b>    | -0.14 | 4.91E-01 | -0.21 | 2.93E-01 |
| <b>AC096670.3</b>    | 0.11  | 5.89E-01 | -0.21 | 2.93E-01 |
| <b>ALDH2</b>         | 0.38  | 4.78E-02 | 0.21  | 2.93E-01 |
| <b>CDK15</b>         | 0.09  | 6.58E-01 | -0.21 | 2.93E-01 |
| <b>DPY19L1P1</b>     | -0.13 | 5.10E-01 | -0.21 | 2.93E-01 |
| <b>EDN3</b>          | -0.08 | 7.03E-01 | 0.21  | 2.93E-01 |
| <b>FN3K</b>          | 0.10  | 6.31E-01 | 0.21  | 2.93E-01 |
| <b>GNG11</b>         | -0.05 | 8.04E-01 | -0.21 | 2.93E-01 |
| <b>HS3ST6</b>        | -0.28 | 1.52E-01 | -0.21 | 2.93E-01 |
| <b>IGFBP4</b>        | -0.17 | 3.96E-01 | 0.21  | 2.93E-01 |
| <b>KLF17P1</b>       | 0.03  | 8.99E-01 | 0.21  | 2.93E-01 |
| <b>LINC00632</b>     | -0.20 | 3.17E-01 | -0.21 | 2.93E-01 |
| <b>MCCC1-AS1</b>     | -0.09 | 6.53E-01 | -0.21 | 2.93E-01 |
| <b>MIR620</b>        | -0.22 | 2.59E-01 | -0.21 | 2.93E-01 |
| <b>MTMR7</b>         | -0.07 | 7.25E-01 | -0.21 | 2.93E-01 |
| <b>PDGFC</b>         | -0.39 | 3.91E-02 | 0.21  | 2.93E-01 |
| <b>RP11-304L19.2</b> | -0.01 | 9.46E-01 | -0.21 | 2.93E-01 |
| <b>RP11-360N9.2</b>  | 0.29  | 1.31E-01 | 0.21  | 2.93E-01 |
| <b>RP11-461L13.3</b> | 0.08  | 6.76E-01 | -0.21 | 2.93E-01 |
| <b>RP4-598P13.1</b>  | -0.29 | 1.29E-01 | 0.21  | 2.93E-01 |
| <b>SEZ6L</b>         | -0.19 | 3.36E-01 | -0.21 | 2.93E-01 |
| <b>STARD7-AS1</b>    | 0.14  | 4.74E-01 | 0.21  | 2.93E-01 |
| <b>SYN1</b>          | -0.15 | 4.47E-01 | -0.21 | 2.93E-01 |
| <b>TSPEAR-AS1</b>    | 0.05  | 8.10E-01 | 0.21  | 2.93E-01 |
| <b>UPF3AP2</b>       | -0.44 | 1.85E-02 | 0.21  | 2.93E-01 |
| <b>XLOC_008786</b>   | -0.25 | 2.05E-01 | -0.21 | 2.93E-01 |
| <b>ARID5A</b>        | 0.11  | 5.78E-01 | 0.21  | 2.94E-01 |
| <b>CCAR1</b>         | 0.11  | 5.81E-01 | 0.21  | 2.94E-01 |
| <b>DBH</b>           | -0.04 | 8.45E-01 | 0.21  | 2.94E-01 |
| <b>FUNDC1</b>        | 0.08  | 6.94E-01 | 0.21  | 2.94E-01 |
| <b>FZR1</b>          | 0.16  | 4.04E-01 | 0.21  | 2.94E-01 |
| <b>GNAS</b>          | 0.18  | 3.57E-01 | 0.21  | 2.94E-01 |
| <b>IBA57</b>         | 0.26  | 1.75E-01 | 0.21  | 2.94E-01 |
| <b>LENG9</b>         | 0.36  | 6.05E-02 | 0.21  | 2.94E-01 |
| <b>LILRA5</b>        | -0.13 | 5.19E-01 | 0.21  | 2.94E-01 |
| <b>NECAP2</b>        | -0.02 | 9.37E-01 | 0.21  | 2.94E-01 |
| <b>ORAI3</b>         | -0.06 | 7.71E-01 | 0.21  | 2.94E-01 |
| <b>SDC3</b>          | -0.18 | 3.69E-01 | 0.21  | 2.94E-01 |
| <b>8-Sep</b>         | 0.01  | 9.70E-01 | 0.21  | 2.94E-01 |
| <b>TNK1</b>          | -0.15 | 4.41E-01 | 0.21  | 2.94E-01 |

|                      |       |          |       |          |
|----------------------|-------|----------|-------|----------|
| <b>APOA1-AS</b>      | -0.08 | 6.73E-01 | -0.21 | 2.94E-01 |
| <b>DST</b>           | -0.01 | 9.51E-01 | -0.21 | 2.94E-01 |
| <b>PDZD8</b>         | 0.22  | 2.55E-01 | -0.21 | 2.94E-01 |
| <b>PTGES3L</b>       | 0.13  | 5.05E-01 | -0.21 | 2.94E-01 |
| <b>REST</b>          | 0.04  | 8.49E-01 | -0.21 | 2.94E-01 |
| <b>SERPINA13P</b>    | -0.02 | 9.31E-01 | -0.21 | 2.94E-01 |
| <b>TFB1M</b>         | 0.29  | 1.30E-01 | -0.21 | 2.94E-01 |
| <b>AC011551.3</b>    | 0.06  | 7.80E-01 | -0.21 | 2.95E-01 |
| <b>ANAPC2</b>        | 0.00  | 1.00E+00 | 0.21  | 2.95E-01 |
| <b>BST2</b>          | 0.08  | 7.01E-01 | 0.21  | 2.95E-01 |
| <b>CTD-2547L16.1</b> | -0.31 | 1.06E-01 | -0.21 | 2.95E-01 |
| <b>CTD-2561B21.4</b> | -0.19 | 3.34E-01 | -0.21 | 2.95E-01 |
| <b>DNAJB7</b>        | 0.23  | 2.37E-01 | -0.21 | 2.95E-01 |
| <b>HDC</b>           | -0.03 | 8.88E-01 | -0.21 | 2.95E-01 |
| <b>KRT36</b>         | -0.27 | 1.61E-01 | -0.21 | 2.95E-01 |
| <b>MMP28</b>         | -0.07 | 7.37E-01 | 0.21  | 2.95E-01 |
| <b>PI15</b>          | 0.02  | 9.12E-01 | 0.21  | 2.95E-01 |
| <b>RN7SL752P</b>     | 0.12  | 5.54E-01 | 0.21  | 2.95E-01 |
| <b>RP11-640M9.1</b>  | -0.53 | 4.00E-03 | -0.21 | 2.95E-01 |
| <b>RP11-806H10.4</b> | 0.00  | 9.82E-01 | 0.21  | 2.95E-01 |
| <b>SMG1P5</b>        | 0.13  | 5.11E-01 | -0.21 | 2.95E-01 |
| <b>SNORA77</b>       | -0.03 | 8.81E-01 | 0.21  | 2.95E-01 |
| <b>AC004069.2</b>    | -0.14 | 4.79E-01 | 0.21  | 2.96E-01 |
| <b>ACSM4</b>         | -0.18 | 3.65E-01 | 0.21  | 2.96E-01 |
| <b>CLEC14A</b>       | -0.22 | 2.65E-01 | 0.21  | 2.96E-01 |
| <b>CTD-2537I9.13</b> | -0.22 | 2.59E-01 | 0.21  | 2.96E-01 |
| <b>CTD-2541M15.3</b> | -0.19 | 3.44E-01 | 0.21  | 2.96E-01 |
| <b>MIR603</b>        | 0.22  | 2.59E-01 | -0.21 | 2.96E-01 |
| <b>NT5C3A</b>        | 0.42  | 2.54E-02 | 0.21  | 2.96E-01 |
| <b>PPM1K</b>         | 0.26  | 1.89E-01 | -0.21 | 2.96E-01 |
| <b>RBMX</b>          | 0.23  | 2.40E-01 | -0.21 | 2.96E-01 |
| <b>RP11-582E3.6</b>  | 0.10  | 6.07E-01 | 0.21  | 2.96E-01 |
| <b>STAG3L5P</b>      | -0.12 | 5.58E-01 | -0.21 | 2.96E-01 |
| <b>ZCCHC4</b>        | -0.03 | 8.91E-01 | -0.21 | 2.96E-01 |
| <b>BAG1</b>          | -0.16 | 4.14E-01 | -0.21 | 2.96E-01 |
| <b>CHI3L1</b>        | -0.05 | 8.02E-01 | -0.21 | 2.96E-01 |
| <b>EVI2B</b>         | 0.08  | 6.88E-01 | 0.21  | 2.96E-01 |
| <b>G25440</b>        | 0.02  | 9.14E-01 | -0.21 | 2.96E-01 |
| <b>GS1-393G12.14</b> | 0.00  | 9.90E-01 | -0.21 | 2.96E-01 |
| <b>PROM1</b>         | 0.53  | 4.02E-03 | 0.21  | 2.96E-01 |
| <b>PSMC3IP</b>       | -0.24 | 2.23E-01 | -0.21 | 2.96E-01 |
| <b>PVRL3</b>         | -0.33 | 8.62E-02 | -0.21 | 2.96E-01 |
| <b>RASGRP4</b>       | -0.12 | 5.59E-01 | 0.21  | 2.96E-01 |
| <b>RHOT1P1</b>       | 0.09  | 6.60E-01 | -0.21 | 2.96E-01 |
| <b>RN7SL145P</b>     | -0.04 | 8.36E-01 | 0.21  | 2.96E-01 |
| <b>RN7SL388P</b>     | 0.35  | 7.12E-02 | 0.21  | 2.96E-01 |
| <b>RNU5A-8P</b>      | 0.01  | 9.55E-01 | 0.21  | 2.96E-01 |

|               |       |          |       |          |
|---------------|-------|----------|-------|----------|
| RP11-381E24.1 | 0.11  | 5.93E-01 | -0.21 | 2.96E-01 |
| RP11-566E18.1 | 0.17  | 4.00E-01 | -0.21 | 2.96E-01 |
| RP5-1042I8.7  | -0.31 | 1.03E-01 | -0.21 | 2.96E-01 |
| RP5-968P14.2  | -0.28 | 1.42E-01 | 0.21  | 2.96E-01 |
| SEPT7P2       | -0.26 | 1.86E-01 | -0.21 | 2.96E-01 |
| TMEM119       | -0.01 | 9.58E-01 | 0.21  | 2.96E-01 |
| UBASH3B       | -0.12 | 5.35E-01 | -0.21 | 2.96E-01 |
| ZNF786        | 0.42  | 2.53E-02 | 0.21  | 2.96E-01 |
| AC005042.3    | -0.10 | 6.10E-01 | -0.21 | 2.97E-01 |
| AC011385.2    | 0.10  | 6.10E-01 | 0.21  | 2.97E-01 |
| APMAP         | 0.06  | 7.81E-01 | -0.21 | 2.97E-01 |
| B4GALNT4      | -0.17 | 3.76E-01 | -0.21 | 2.97E-01 |
| CNOT7         | -0.02 | 9.31E-01 | -0.21 | 2.97E-01 |
| DALRD3        | 0.01  | 9.55E-01 | 0.21  | 2.97E-01 |
| FAM20B        | -0.01 | 9.66E-01 | -0.21 | 2.97E-01 |
| FAM73B        | 0.00  | 9.94E-01 | 0.21  | 2.97E-01 |
| FAT1          | -0.01 | 9.55E-01 | 0.21  | 2.97E-01 |
| G14979        | -0.14 | 4.62E-01 | 0.21  | 2.97E-01 |
| G26658        | -0.01 | 9.48E-01 | 0.21  | 2.97E-01 |
| LINC00871     | 0.10  | 5.95E-01 | -0.21 | 2.97E-01 |
| LRRC2-AS1     | 0.27  | 1.60E-01 | -0.21 | 2.97E-01 |
| PIGQ          | -0.10 | 6.27E-01 | 0.21  | 2.97E-01 |
| RARA          | -0.04 | 8.29E-01 | 0.21  | 2.97E-01 |
| RHPN1-AS1     | -0.22 | 2.70E-01 | -0.21 | 2.97E-01 |
| RP11-114F3.4  | 0.12  | 5.54E-01 | -0.21 | 2.97E-01 |
| RP13-93L13.1  | -0.24 | 2.20E-01 | -0.21 | 2.97E-01 |
| RPL18P10      | -0.08 | 6.80E-01 | 0.21  | 2.97E-01 |
| RPS6          | 0.17  | 3.82E-01 | -0.21 | 2.97E-01 |
| SNORA74B      | 0.02  | 9.05E-01 | 0.21  | 2.97E-01 |
| STOX1         | -0.03 | 8.89E-01 | -0.21 | 2.97E-01 |
| SYTL4         | -0.09 | 6.34E-01 | -0.21 | 2.97E-01 |
| TANC2         | 0.10  | 6.20E-01 | -0.21 | 2.97E-01 |
| TPPP3         | -0.17 | 3.76E-01 | -0.21 | 2.97E-01 |
| ART4          | 0.21  | 2.76E-01 | 0.21  | 2.98E-01 |
| B4GALT3       | 0.22  | 2.56E-01 | -0.21 | 2.98E-01 |
| CHTF18        | -0.11 | 5.90E-01 | -0.21 | 2.98E-01 |
| CTA-360L10.1  | -0.43 | 2.35E-02 | -0.21 | 2.98E-01 |
| DHFRL1        | 0.08  | 6.93E-01 | 0.21  | 2.98E-01 |
| G7635         | -0.27 | 1.64E-01 | 0.21  | 2.98E-01 |
| HOXA1         | -0.06 | 7.68E-01 | 0.21  | 2.98E-01 |
| IFT80         | -0.06 | 7.68E-01 | -0.21 | 2.98E-01 |
| IGDCC4        | -0.34 | 8.08E-02 | -0.21 | 2.98E-01 |
| MYCBPAP       | 0.35  | 6.57E-02 | 0.21  | 2.98E-01 |
| PLCB1-IT1     | 0.02  | 9.08E-01 | -0.21 | 2.98E-01 |
| RP5-1029F21.4 | -0.18 | 3.57E-01 | -0.21 | 2.98E-01 |
| SNORA26       | 0.09  | 6.44E-01 | 0.21  | 2.98E-01 |
| TTPAL         | 0.04  | 8.53E-01 | -0.21 | 2.98E-01 |

|                      |       |          |       |          |
|----------------------|-------|----------|-------|----------|
| <b>XLOC_005452</b>   | -0.19 | 3.37E-01 | 0.21  | 2.98E-01 |
| <b>ZNF214</b>        | -0.07 | 7.17E-01 | 0.21  | 2.98E-01 |
| <b>ZNF792</b>        | -0.23 | 2.33E-01 | 0.21  | 2.98E-01 |
| <b>AC015923.1</b>    | -0.12 | 5.40E-01 | -0.21 | 2.99E-01 |
| <b>BORCS5</b>        | 0.31  | 1.08E-01 | 0.21  | 2.99E-01 |
| <b>CTSS</b>          | 0.05  | 8.02E-01 | 0.21  | 2.99E-01 |
| <b>DNAH11</b>        | -0.18 | 3.63E-01 | -0.21 | 2.99E-01 |
| <b>DNM1P47</b>       | 0.02  | 9.27E-01 | 0.21  | 2.99E-01 |
| <b>ESYT3</b>         | 0.18  | 3.52E-01 | 0.21  | 2.99E-01 |
| <b>G8228</b>         | 0.04  | 8.58E-01 | 0.21  | 2.99E-01 |
| <b>HOMEZ</b>         | 0.13  | 5.20E-01 | 0.21  | 2.99E-01 |
| <b>ING5</b>          | 0.04  | 8.46E-01 | -0.21 | 2.99E-01 |
| <b>KIF3B</b>         | 0.17  | 3.79E-01 | 0.21  | 2.99E-01 |
| <b>NUP205</b>        | 0.02  | 9.10E-01 | -0.21 | 2.99E-01 |
| <b>RP11-173A8.2</b>  | 0.04  | 8.55E-01 | -0.21 | 2.99E-01 |
| <b>RP11-446E9.1</b>  | -0.24 | 2.27E-01 | 0.21  | 2.99E-01 |
| <b>RP11-645C24.5</b> | -0.08 | 6.83E-01 | -0.21 | 2.99E-01 |
| <b>RP11-761N21.1</b> | 0.01  | 9.70E-01 | 0.21  | 2.99E-01 |
| <b>RP11-79H23.3</b>  | 0.29  | 1.39E-01 | 0.21  | 2.99E-01 |
| <b>SBF2-AS1</b>      | -0.19 | 3.36E-01 | -0.21 | 2.99E-01 |
| <b>UROD</b>          | 0.13  | 5.18E-01 | 0.21  | 2.99E-01 |
| <b>AC018755.16</b>   | 0.17  | 4.00E-01 | 0.21  | 2.99E-01 |
| <b>ADGRF5</b>        | -0.06 | 7.72E-01 | 0.21  | 2.99E-01 |
| <b>CACNB1</b>        | -0.28 | 1.54E-01 | -0.21 | 2.99E-01 |
| <b>CTA-305I2.1</b>   | 0.07  | 7.42E-01 | 0.21  | 2.99E-01 |
| <b>CYP24A1</b>       | 0.24  | 2.24E-01 | 0.21  | 2.99E-01 |
| <b>G42257</b>        | -0.12 | 5.35E-01 | -0.21 | 2.99E-01 |
| <b>KIAA1109</b>      | -0.24 | 2.11E-01 | -0.21 | 2.99E-01 |
| <b>MIR2278</b>       | 0.19  | 3.34E-01 | -0.21 | 2.99E-01 |
| <b>NPW</b>           | -0.29 | 1.29E-01 | 0.21  | 2.99E-01 |
| <b>PLEKHM1</b>       | 0.11  | 5.93E-01 | 0.21  | 2.99E-01 |
| <b>RP11-43D2.2</b>   | -0.24 | 2.14E-01 | 0.21  | 2.99E-01 |
| <b>RP11-458F8.4</b>  | -0.10 | 6.01E-01 | 0.21  | 2.99E-01 |
| <b>RPLP1P13</b>      | 0.01  | 9.55E-01 | -0.21 | 2.99E-01 |
| <b>SHANK2</b>        | 0.10  | 6.02E-01 | 0.21  | 2.99E-01 |
| <b>SHPK</b>          | 0.41  | 3.12E-02 | 0.21  | 2.99E-01 |
| <b>TMEM165</b>       | 0.28  | 1.51E-01 | 0.21  | 2.99E-01 |
| <b>TXNDC16</b>       | -0.07 | 7.18E-01 | -0.21 | 2.99E-01 |
| <b>AL139022.1</b>    | 0.38  | 4.76E-02 | 0.21  | 3.00E-01 |
| <b>BCL2L11</b>       | 0.29  | 1.33E-01 | 0.21  | 3.00E-01 |
| <b>DYRK3</b>         | 0.08  | 6.72E-01 | 0.21  | 3.00E-01 |
| <b>FANCF</b>         | 0.00  | 9.97E-01 | -0.21 | 3.00E-01 |
| <b>FCRLB</b>         | 0.22  | 2.71E-01 | 0.21  | 3.00E-01 |
| <b>LRR37A11P</b>     | 0.22  | 2.63E-01 | -0.21 | 3.00E-01 |
| <b>MARS2</b>         | 0.34  | 7.59E-02 | -0.21 | 3.00E-01 |
| <b>MTCP1</b>         | -0.01 | 9.67E-01 | -0.21 | 3.00E-01 |
| <b>NSUN5P2</b>       | -0.31 | 1.14E-01 | -0.21 | 3.00E-01 |

|                |       |          |       |          |
|----------------|-------|----------|-------|----------|
| PCED1A         | 0.07  | 7.28E-01 | 0.21  | 3.00E-01 |
| POLR3G         | 0.20  | 3.11E-01 | 0.21  | 3.00E-01 |
| RP11-114F10.2  | -0.30 | 1.21E-01 | -0.21 | 3.00E-01 |
| RP11-177A2.5   | -0.08 | 6.70E-01 | -0.21 | 3.00E-01 |
| RP11-99A1.2    | -0.15 | 4.54E-01 | -0.21 | 3.00E-01 |
| RRP7BP         | 0.13  | 4.93E-01 | -0.21 | 3.00E-01 |
| RS1            | -0.21 | 2.83E-01 | 0.21  | 3.00E-01 |
| SULT1C2        | -0.34 | 7.22E-02 | -0.21 | 3.00E-01 |
| TM2D1          | -0.04 | 8.22E-01 | -0.21 | 3.00E-01 |
| TYROBP         | 0.18  | 3.57E-01 | 0.21  | 3.00E-01 |
| AC004947.2     | 0.24  | 2.20E-01 | -0.21 | 3.01E-01 |
| AC006277.2     | -0.15 | 4.36E-01 | 0.21  | 3.01E-01 |
| AC026188.1     | -0.52 | 4.50E-03 | -0.21 | 3.01E-01 |
| AC104699.1     | -0.01 | 9.66E-01 | 0.21  | 3.01E-01 |
| ACSM3          | -0.01 | 9.66E-01 | -0.21 | 3.01E-01 |
| CREBZF         | -0.06 | 7.73E-01 | -0.21 | 3.01E-01 |
| FAM222B        | 0.33  | 8.42E-02 | 0.21  | 3.01E-01 |
| GNAZ           | -0.05 | 8.04E-01 | -0.21 | 3.01E-01 |
| IL36G          | 0.34  | 7.84E-02 | 0.21  | 3.01E-01 |
| RAB35          | 0.25  | 1.95E-01 | 0.21  | 3.01E-01 |
| RP11-177J6.1   | 0.13  | 5.10E-01 | -0.21 | 3.01E-01 |
| RP11-210K20.2  | 0.01  | 9.54E-01 | -0.21 | 3.01E-01 |
| RP11-229P13.25 | 0.30  | 1.25E-01 | -0.21 | 3.01E-01 |
| RP3-467N11.2   | -0.20 | 3.09E-01 | 0.21  | 3.01E-01 |
| THAP3          | -0.11 | 5.74E-01 | 0.21  | 3.01E-01 |
| TMPRSS7        | -0.09 | 6.61E-01 | -0.21 | 3.01E-01 |
| XLOC_008100    | -0.30 | 1.15E-01 | -0.21 | 3.01E-01 |
| AP001626.1     | 0.41  | 2.91E-02 | 0.21  | 3.01E-01 |
| CITF22-92A6.1  | -0.01 | 9.72E-01 | 0.21  | 3.01E-01 |
| CTSZ           | -0.01 | 9.74E-01 | 0.21  | 3.01E-01 |
| IGHGP          | 0.23  | 2.31E-01 | 0.21  | 3.01E-01 |
| MIR4295        | 0.01  | 9.72E-01 | 0.21  | 3.01E-01 |
| RREB1          | 0.11  | 5.75E-01 | 0.21  | 3.01E-01 |
| TMEM184A       | 0.01  | 9.51E-01 | 0.21  | 3.01E-01 |
| TRBV6-5        | 0.03  | 8.87E-01 | 0.21  | 3.01E-01 |
| UBP1           | 0.04  | 8.21E-01 | 0.21  | 3.01E-01 |
| AP000253.1     | -0.20 | 2.98E-01 | -0.21 | 3.01E-01 |
| CCDC91         | -0.33 | 9.12E-02 | -0.21 | 3.01E-01 |
| G2520          | 0.14  | 4.91E-01 | -0.21 | 3.01E-01 |
| G38642         | 0.05  | 8.12E-01 | -0.21 | 3.01E-01 |
| PSG2           | 0.18  | 3.64E-01 | -0.21 | 3.01E-01 |
| RP1-179N16.6   | 0.07  | 7.10E-01 | -0.21 | 3.01E-01 |
| RP11-111G23.1  | -0.21 | 2.82E-01 | -0.21 | 3.01E-01 |
| RP11-617F23.2  | 0.05  | 7.98E-01 | -0.21 | 3.01E-01 |
| RP4-718P11.1   | 0.00  | 9.87E-01 | -0.21 | 3.01E-01 |
| SIPA1L1        | -0.13 | 5.19E-01 | -0.21 | 3.01E-01 |
| TUBA3E         | -0.12 | 5.27E-01 | -0.21 | 3.01E-01 |

|                       |       |          |       |          |
|-----------------------|-------|----------|-------|----------|
| <b>TYRP1</b>          | -0.14 | 4.73E-01 | -0.21 | 3.01E-01 |
| <b>VWA2</b>           | -0.03 | 8.68E-01 | -0.21 | 3.01E-01 |
| <b>ALMS1P</b>         | 0.02  | 9.28E-01 | 0.21  | 3.02E-01 |
| <b>BOD1L1</b>         | -0.09 | 6.39E-01 | -0.21 | 3.02E-01 |
| <b>CORIN</b>          | -0.06 | 7.49E-01 | 0.21  | 3.02E-01 |
| <b>CTC-1337H24.3</b>  | -0.23 | 2.37E-01 | -0.21 | 3.02E-01 |
| <b>ETV6</b>           | 0.14  | 4.69E-01 | 0.21  | 3.02E-01 |
| <b>FAM122B</b>        | -0.04 | 8.41E-01 | -0.21 | 3.02E-01 |
| <b>G35786</b>         | -0.30 | 1.24E-01 | 0.21  | 3.02E-01 |
| <b>GNG3</b>           | -0.10 | 6.18E-01 | -0.21 | 3.02E-01 |
| <b>IFITM10</b>        | 0.06  | 7.66E-01 | 0.21  | 3.02E-01 |
| <b>IKZF3</b>          | 0.26  | 1.80E-01 | 0.21  | 3.02E-01 |
| <b>LINC01446</b>      | -0.13 | 5.10E-01 | -0.21 | 3.02E-01 |
| <b>LRRN4</b>          | -0.24 | 2.11E-01 | -0.21 | 3.02E-01 |
| <b>OR7E38P</b>        | 0.00  | 9.81E-01 | 0.21  | 3.02E-01 |
| <b>RP1-249I4.2</b>    | 0.07  | 7.20E-01 | -0.21 | 3.02E-01 |
| <b>RP11-235E17.5</b>  | -0.18 | 3.52E-01 | 0.21  | 3.02E-01 |
| <b>RP11-459I19.1</b>  | -0.28 | 1.56E-01 | 0.21  | 3.02E-01 |
| <b>RP11-486L19.2</b>  | 0.08  | 6.78E-01 | -0.21 | 3.02E-01 |
| <b>RP11-490H24.5</b>  | 0.14  | 4.74E-01 | 0.21  | 3.02E-01 |
| <b>RP11-91I20.4</b>   | 0.11  | 5.75E-01 | 0.21  | 3.02E-01 |
| <b>RP3-510D11.2</b>   | 0.17  | 3.97E-01 | 0.21  | 3.02E-01 |
| <b>RP4-760C5.3</b>    | 0.15  | 4.31E-01 | -0.21 | 3.02E-01 |
| <b>SEMA5B</b>         | 0.04  | 8.46E-01 | -0.21 | 3.02E-01 |
| <b>SENP1</b>          | 0.29  | 1.40E-01 | -0.21 | 3.02E-01 |
| <b>SHH</b>            | 0.09  | 6.62E-01 | -0.21 | 3.02E-01 |
| <b>SVEP1</b>          | -0.15 | 4.31E-01 | -0.21 | 3.02E-01 |
| <b>TRAV26-1</b>       | 0.09  | 6.54E-01 | 0.21  | 3.02E-01 |
| <b>TRGV10</b>         | -0.21 | 2.75E-01 | 0.21  | 3.02E-01 |
| <b>AC010642.1</b>     | 0.28  | 1.46E-01 | 0.21  | 3.03E-01 |
| <b>ASPHD2</b>         | -0.23 | 2.37E-01 | 0.21  | 3.03E-01 |
| <b>BCL2L10</b>        | -0.13 | 5.05E-01 | -0.21 | 3.03E-01 |
| <b>C12orf74</b>       | 0.44  | 1.82E-02 | 0.21  | 3.03E-01 |
| <b>COL8A1</b>         | -0.36 | 5.68E-02 | 0.21  | 3.03E-01 |
| <b>CTC-523E23.5</b>   | -0.17 | 3.75E-01 | 0.21  | 3.03E-01 |
| <b>CTD-3037G24.3</b>  | -0.09 | 6.63E-01 | -0.21 | 3.03E-01 |
| <b>P1-UPK3BP1-PMS</b> | -0.32 | 9.33E-02 | 0.21  | 3.03E-01 |
| <b>LDLRAD1</b>        | -0.44 | 1.78E-02 | 0.21  | 3.03E-01 |
| <b>LINC00702</b>      | -0.05 | 8.12E-01 | 0.21  | 3.03E-01 |
| <b>LRSAM1</b>         | 0.08  | 6.80E-01 | 0.21  | 3.03E-01 |
| <b>MTRNR2L1</b>       | 0.42  | 2.72E-02 | -0.21 | 3.03E-01 |
| <b>MYHAS</b>          | -0.21 | 2.83E-01 | 0.21  | 3.03E-01 |
| <b>MYO18B</b>         | -0.34 | 8.00E-02 | 0.21  | 3.03E-01 |
| <b>NANOGP8</b>        | -0.12 | 5.49E-01 | -0.21 | 3.03E-01 |
| <b>PSG7</b>           | 0.40  | 3.37E-02 | 0.21  | 3.03E-01 |
| <b>RAF1P1</b>         | -0.05 | 8.12E-01 | 0.21  | 3.03E-01 |
| <b>RN7SL482P</b>      | -0.08 | 6.81E-01 | 0.21  | 3.03E-01 |

|                |       |          |       |          |
|----------------|-------|----------|-------|----------|
| RP11-421L21.2  | 0.22  | 2.66E-01 | -0.21 | 3.03E-01 |
| RP11-423P10.2  | 0.12  | 5.50E-01 | -0.21 | 3.03E-01 |
| RP11-536L3.4   | 0.09  | 6.47E-01 | -0.21 | 3.03E-01 |
| RP11-707M3.3   | -0.27 | 1.69E-01 | -0.21 | 3.03E-01 |
| RP11-712B9.5   | -0.13 | 5.00E-01 | -0.21 | 3.03E-01 |
| SPACA6P        | -0.18 | 3.54E-01 | -0.21 | 3.03E-01 |
| SPATA7         | -0.24 | 2.22E-01 | -0.21 | 3.03E-01 |
| SPRR2F         | 0.25  | 2.05E-01 | 0.21  | 3.03E-01 |
| TBL1Y          | 0.34  | 7.74E-02 | 0.21  | 3.03E-01 |
| ZFX            | -0.32 | 9.53E-02 | -0.21 | 3.03E-01 |
| ZNF517         | 0.15  | 4.48E-01 | 0.21  | 3.03E-01 |
| ZNF709         | -0.08 | 6.94E-01 | -0.21 | 3.03E-01 |
| ZNF721         | -0.07 | 7.28E-01 | -0.21 | 3.03E-01 |
| AES            | 0.08  | 6.76E-01 | 0.21  | 3.04E-01 |
| COL25A1        | -0.30 | 1.24E-01 | -0.21 | 3.04E-01 |
| CTC-512J12.7   | -0.24 | 2.11E-01 | 0.21  | 3.04E-01 |
| HSPG2          | -0.16 | 4.04E-01 | 0.21  | 3.04E-01 |
| LAMC2          | -0.20 | 3.16E-01 | -0.21 | 3.04E-01 |
| MICU2          | 0.17  | 3.83E-01 | -0.21 | 3.04E-01 |
| MPRIP-AS1      | 0.02  | 9.26E-01 | -0.21 | 3.04E-01 |
| PABPC1L        | 0.03  | 8.83E-01 | -0.21 | 3.04E-01 |
| RN7SKP271      | -0.21 | 2.73E-01 | -0.21 | 3.04E-01 |
| RN7SL749P      | 0.08  | 6.82E-01 | 0.21  | 3.04E-01 |
| RP11-182J1.1   | 0.14  | 4.62E-01 | 0.21  | 3.04E-01 |
| RP11-23J18.1   | -0.09 | 6.33E-01 | -0.21 | 3.04E-01 |
| RP11-70D24.1   | 0.11  | 5.63E-01 | -0.21 | 3.04E-01 |
| RPS6KA3        | -0.02 | 9.00E-01 | -0.21 | 3.04E-01 |
| SYNM           | 0.15  | 4.33E-01 | 0.21  | 3.04E-01 |
| TFAP2A-AS1     | 0.05  | 7.95E-01 | 0.21  | 3.04E-01 |
| YWHAZP4        | 0.04  | 8.39E-01 | -0.21 | 3.04E-01 |
| AC112721.2     | 0.06  | 7.67E-01 | 0.21  | 3.04E-01 |
| CLU            | -0.30 | 1.27E-01 | 0.21  | 3.04E-01 |
| GPR4           | -0.04 | 8.58E-01 | -0.21 | 3.04E-01 |
| GRXCR2         | 0.26  | 1.84E-01 | -0.21 | 3.04E-01 |
| KRTAP5-1       | -0.07 | 7.38E-01 | 0.21  | 3.04E-01 |
| LA16c-431H6.7  | 0.22  | 2.51E-01 | -0.21 | 3.04E-01 |
| POLR3GL        | -0.17 | 3.87E-01 | 0.21  | 3.04E-01 |
| PPP1R1A        | -0.24 | 2.14E-01 | -0.21 | 3.04E-01 |
| RMRP           | -0.10 | 6.08E-01 | 0.21  | 3.04E-01 |
| RNF222         | 0.17  | 3.84E-01 | 0.21  | 3.04E-01 |
| RNU7-4P        | 0.28  | 1.43E-01 | -0.21 | 3.04E-01 |
| RP11-147L13.14 | 0.21  | 2.87E-01 | -0.21 | 3.04E-01 |
| RP11-206L10.2  | 0.23  | 2.45E-01 | -0.21 | 3.04E-01 |
| RP11-401P9.7   | -0.30 | 1.24E-01 | -0.21 | 3.04E-01 |
| RP11-631M6.2   | -0.12 | 5.40E-01 | 0.21  | 3.04E-01 |
| RP11-717D12.1  | 0.06  | 7.46E-01 | 0.21  | 3.04E-01 |
| RP11-843A23.1  | -0.14 | 4.82E-01 | -0.21 | 3.04E-01 |



|                 |       |          |       |          |
|-----------------|-------|----------|-------|----------|
| RP13-16H11.5    | 0.39  | 4.18E-02 | -0.21 | 3.04E-01 |
| RP13-638C3.3    | -0.11 | 5.92E-01 | 0.21  | 3.04E-01 |
| RP4-537K23.4    | 0.26  | 1.86E-01 | -0.21 | 3.04E-01 |
| TSPAN11         | -0.11 | 5.72E-01 | 0.21  | 3.04E-01 |
| TXNP6           | -0.22 | 2.59E-01 | -0.21 | 3.04E-01 |
| UBA6            | 0.37  | 5.14E-02 | 0.21  | 3.04E-01 |
| XLOC_000974     | -0.07 | 7.23E-01 | -0.21 | 3.04E-01 |
| XLOC_010711     | -0.02 | 9.26E-01 | -0.21 | 3.04E-01 |
| ZNF385D-AS2     | 0.05  | 8.10E-01 | -0.21 | 3.04E-01 |
| ZNF571-AS1      | 0.10  | 6.06E-01 | -0.21 | 3.04E-01 |
| ANXA10          | 0.02  | 9.09E-01 | 0.20  | 3.05E-01 |
| AP000688.29     | 0.21  | 2.90E-01 | 0.20  | 3.05E-01 |
| ARHGAP32        | 0.14  | 4.85E-01 | 0.20  | 3.05E-01 |
| CTD-2270L9.4    | 0.23  | 2.41E-01 | 0.20  | 3.05E-01 |
| CTSA            | 0.04  | 8.37E-01 | 0.20  | 3.05E-01 |
| EVI5L           | 0.39  | 4.14E-02 | 0.20  | 3.05E-01 |
| FCHO2           | 0.03  | 8.86E-01 | -0.20 | 3.05E-01 |
| MIR125B2        | 0.18  | 3.56E-01 | -0.20 | 3.05E-01 |
| NDUFB1P2        | -0.10 | 6.10E-01 | -0.20 | 3.05E-01 |
| PLXNC1          | -0.40 | 3.60E-02 | -0.20 | 3.05E-01 |
| RN7SKP50        | 0.04  | 8.33E-01 | -0.20 | 3.05E-01 |
| RP11-753H16.3   | -0.03 | 8.99E-01 | -0.20 | 3.05E-01 |
| RP11-80H5.9     | -0.35 | 6.87E-02 | -0.20 | 3.05E-01 |
| RP11-831F12.3   | 0.23  | 2.47E-01 | -0.20 | 3.05E-01 |
| SH2D5           | -0.06 | 7.81E-01 | 0.20  | 3.05E-01 |
| XLOC_013095     | -0.07 | 7.23E-01 | 0.20  | 3.05E-01 |
| AC090952.5      | -0.13 | 5.05E-01 | 0.20  | 3.06E-01 |
| CHST13          | -0.23 | 2.37E-01 | 0.20  | 3.06E-01 |
| LL21NC02-1C16.1 | 0.40  | 3.73E-02 | 0.20  | 3.06E-01 |
| RNU6-494P       | -0.30 | 1.27E-01 | 0.20  | 3.06E-01 |
| RP11-208G20.3   | 0.19  | 3.35E-01 | 0.20  | 3.06E-01 |
| TEX261          | 0.08  | 6.94E-01 | 0.20  | 3.06E-01 |
| THAP8           | -0.14 | 4.90E-01 | 0.20  | 3.06E-01 |
| AC004067.5      | -0.01 | 9.45E-01 | -0.20 | 3.06E-01 |
| AP001627.1      | -0.11 | 5.67E-01 | -0.20 | 3.06E-01 |
| CEP97           | 0.11  | 5.68E-01 | -0.20 | 3.06E-01 |
| FIRRE           | -0.15 | 4.37E-01 | -0.20 | 3.06E-01 |
| G19261          | -0.03 | 8.77E-01 | -0.20 | 3.06E-01 |
| NDUFB8P2        | 0.03  | 8.73E-01 | -0.20 | 3.06E-01 |
| NUTM1           | 0.00  | 9.99E-01 | -0.20 | 3.06E-01 |
| PCM1            | -0.04 | 8.40E-01 | -0.20 | 3.06E-01 |
| PLCH2           | 0.00  | 9.94E-01 | -0.20 | 3.06E-01 |
| RP11-19E18.2    | -0.18 | 3.52E-01 | -0.20 | 3.06E-01 |
| RP11-544M22.1   | -0.27 | 1.70E-01 | -0.20 | 3.06E-01 |
| RP11-666F17.1   | -0.11 | 5.73E-01 | -0.20 | 3.06E-01 |
| RP11-89F17.5    | -0.08 | 6.98E-01 | -0.20 | 3.06E-01 |
| RP11-89N17.2    | 0.03  | 8.82E-01 | -0.20 | 3.06E-01 |

|                       |       |          |       |          |
|-----------------------|-------|----------|-------|----------|
| <b>RP5-1110E20.1</b>  | -0.19 | 3.25E-01 | -0.20 | 3.06E-01 |
| <b>SLC24A5</b>        | -0.10 | 5.99E-01 | -0.20 | 3.06E-01 |
| <b>SLC6A15</b>        | -0.03 | 8.70E-01 | -0.20 | 3.06E-01 |
| <b>SLC8A3</b>         | 0.02  | 9.15E-01 | -0.20 | 3.06E-01 |
| <b>TGIF1P1</b>        | -0.16 | 4.22E-01 | -0.20 | 3.06E-01 |
| <b>AC022182.1</b>     | 0.04  | 8.32E-01 | -0.20 | 3.07E-01 |
| <b>C9orf72</b>        | 0.19  | 3.45E-01 | -0.20 | 3.07E-01 |
| <b>COA1</b>           | -0.41 | 2.86E-02 | -0.20 | 3.07E-01 |
| <b>CTD-2325B11.1</b>  | -0.08 | 6.83E-01 | -0.20 | 3.07E-01 |
| <b>GRB14</b>          | -0.31 | 1.03E-01 | -0.20 | 3.07E-01 |
| <b>HCG2040054</b>     | -0.12 | 5.51E-01 | -0.20 | 3.07E-01 |
| <b>MIR203</b>         | 0.29  | 1.31E-01 | -0.20 | 3.07E-01 |
| <b>NODAL</b>          | -0.01 | 9.44E-01 | -0.20 | 3.07E-01 |
| <b>PKLR</b>           | 0.27  | 1.68E-01 | -0.20 | 3.07E-01 |
| <b>RDH10-AS1</b>      | 0.01  | 9.78E-01 | -0.20 | 3.07E-01 |
| <b>RNU6-957P</b>      | 0.07  | 7.10E-01 | -0.20 | 3.07E-01 |
| <b>RNU7-101P</b>      | -0.11 | 5.63E-01 | -0.20 | 3.07E-01 |
| <b>RP1-278O22.1</b>   | 0.08  | 6.94E-01 | 0.20  | 3.07E-01 |
| <b>RP11-1365D11.1</b> | -0.28 | 1.49E-01 | -0.20 | 3.07E-01 |
| <b>RP11-367G18.1</b>  | -0.10 | 6.30E-01 | -0.20 | 3.07E-01 |
| <b>RP11-4C20.3</b>    | 0.01  | 9.42E-01 | -0.20 | 3.07E-01 |
| <b>RP11-667M19.10</b> | -0.16 | 4.14E-01 | 0.20  | 3.07E-01 |
| <b>SLAMF9</b>         | -0.38 | 4.87E-02 | 0.20  | 3.07E-01 |
| <b>ST3GAL5</b>        | -0.17 | 3.93E-01 | -0.20 | 3.07E-01 |
| <b>TMPRSS11GP</b>     | -0.01 | 9.72E-01 | -0.20 | 3.07E-01 |
| <b>TRAV29DV5</b>      | 0.18  | 3.65E-01 | -0.20 | 3.07E-01 |
| <b>ZDHHC16</b>        | 0.02  | 9.23E-01 | 0.20  | 3.07E-01 |
| <b>ZNF337</b>         | -0.10 | 6.06E-01 | -0.20 | 3.07E-01 |
| <b>AC007256.5</b>     | -0.27 | 1.61E-01 | -0.20 | 3.07E-01 |
| <b>AC092535.3</b>     | -0.04 | 8.24E-01 | -0.20 | 3.07E-01 |
| <b>AL133243.2</b>     | -0.17 | 3.76E-01 | -0.20 | 3.07E-01 |
| <b>CDKN1A</b>         | 0.44  | 1.82E-02 | 0.20  | 3.07E-01 |
| <b>G18696</b>         | 0.17  | 3.79E-01 | 0.20  | 3.07E-01 |
| <b>G32318</b>         | -0.30 | 1.18E-01 | 0.20  | 3.07E-01 |
| <b>MRI1</b>           | 0.00  | 9.93E-01 | -0.20 | 3.07E-01 |
| <b>PCSK1</b>          | -0.07 | 7.18E-01 | 0.20  | 3.07E-01 |
| <b>PRICKLE2</b>       | 0.42  | 2.54E-02 | 0.20  | 3.07E-01 |
| <b>PTMAP4</b>         | -0.11 | 5.62E-01 | -0.20 | 3.07E-01 |
| <b>RP11-1023L17.2</b> | -0.11 | 5.93E-01 | 0.20  | 3.07E-01 |
| <b>RP11-107N15.1</b>  | -0.04 | 8.25E-01 | 0.20  | 3.07E-01 |
| <b>RP11-115A14.1</b>  | 0.11  | 5.74E-01 | -0.20 | 3.07E-01 |
| <b>RP11-235C23.5</b>  | 0.06  | 7.58E-01 | -0.20 | 3.07E-01 |
| <b>RP11-284B18.3</b>  | 0.08  | 7.01E-01 | -0.20 | 3.07E-01 |
| <b>RP11-332H17.1</b>  | 0.17  | 3.76E-01 | 0.20  | 3.07E-01 |
| <b>RP11-95M15.2</b>   | 0.11  | 5.87E-01 | -0.20 | 3.07E-01 |
| <b>TRADD</b>          | -0.04 | 8.28E-01 | 0.20  | 3.07E-01 |
| <b>UXS1</b>           | 0.04  | 8.33E-01 | -0.20 | 3.07E-01 |

|                |       |          |       |          |
|----------------|-------|----------|-------|----------|
| ZC3HC1         | 0.04  | 8.22E-01 | 0.20  | 3.07E-01 |
| ZCWPW1         | -0.06 | 7.75E-01 | -0.20 | 3.07E-01 |
| C6orf163       | 0.03  | 8.77E-01 | -0.20 | 3.08E-01 |
| CAPNS1         | -0.06 | 7.43E-01 | 0.20  | 3.08E-01 |
| CARM1          | -0.10 | 5.95E-01 | 0.20  | 3.08E-01 |
| CCDC174        | -0.13 | 5.14E-01 | -0.20 | 3.08E-01 |
| CIPC           | -0.06 | 7.61E-01 | -0.20 | 3.08E-01 |
| CSF3R          | 0.03  | 8.71E-01 | 0.20  | 3.08E-01 |
| CTD-2619J13.13 | 0.29  | 1.34E-01 | 0.20  | 3.08E-01 |
| EIF4BP2        | -0.05 | 7.96E-01 | -0.20 | 3.08E-01 |
| GGT5           | -0.11 | 5.89E-01 | 0.20  | 3.08E-01 |
| HNRNPRP1       | -0.06 | 7.61E-01 | -0.20 | 3.08E-01 |
| LRRC45         | -0.06 | 7.78E-01 | 0.20  | 3.08E-01 |
| LRRC9          | 0.07  | 7.21E-01 | -0.20 | 3.08E-01 |
| MT1XP1         | -0.14 | 4.75E-01 | 0.20  | 3.08E-01 |
| NLRP3          | 0.06  | 7.51E-01 | 0.20  | 3.08E-01 |
| PIP5K1A        | -0.04 | 8.42E-01 | -0.20 | 3.08E-01 |
| RBPJ           | 0.16  | 4.16E-01 | -0.20 | 3.08E-01 |
| RNU6-4P        | -0.20 | 3.15E-01 | 0.20  | 3.08E-01 |
| RP11-15A1.7    | -0.03 | 8.91E-01 | 0.20  | 3.08E-01 |
| RP11-288L9.4   | 0.30  | 1.25E-01 | 0.20  | 3.08E-01 |
| RP11-436G20.1  | 0.17  | 3.80E-01 | -0.20 | 3.08E-01 |
| RP11-562A8.5   | -0.17 | 3.93E-01 | 0.20  | 3.08E-01 |
| RP11-83B20.2   | -0.07 | 7.38E-01 | 0.20  | 3.08E-01 |
| RP11-876N24.2  | -0.20 | 3.07E-01 | 0.20  | 3.08E-01 |
| RWDD4P2        | 0.21  | 2.95E-01 | -0.20 | 3.08E-01 |
| SCARNA3        | 0.20  | 3.15E-01 | 0.20  | 3.08E-01 |
| SLC6A10P       | 0.36  | 5.80E-02 | 0.20  | 3.08E-01 |
| UNC5C          | -0.11 | 5.73E-01 | -0.20 | 3.08E-01 |
| XLOC_004041    | 0.12  | 5.59E-01 | -0.20 | 3.08E-01 |
| AC092839.3     | -0.41 | 3.20E-02 | -0.20 | 3.09E-01 |
| ADCK1          | 0.12  | 5.51E-01 | 0.20  | 3.09E-01 |
| ARFGAP3        | -0.24 | 2.20E-01 | -0.20 | 3.09E-01 |
| EXOC3L1        | -0.13 | 5.04E-01 | 0.20  | 3.09E-01 |
| FBXO31         | -0.02 | 9.36E-01 | -0.20 | 3.09E-01 |
| G8320          | -0.10 | 6.08E-01 | 0.20  | 3.09E-01 |
| GRAP2          | -0.26 | 1.77E-01 | 0.20  | 3.09E-01 |
| LEPROTL1       | 0.18  | 3.69E-01 | 0.20  | 3.09E-01 |
| 2-Mar          | 0.22  | 2.59E-01 | 0.20  | 3.09E-01 |
| NECAP1         | 0.15  | 4.49E-01 | -0.20 | 3.09E-01 |
| RP11-1109F11.5 | -0.02 | 9.23E-01 | -0.20 | 3.09E-01 |
| RP11-213H15.1  | -0.29 | 1.29E-01 | 0.20  | 3.09E-01 |
| RP11-352M15.2  | -0.15 | 4.55E-01 | -0.20 | 3.09E-01 |
| RP11-517I3.1   | -0.23 | 2.36E-01 | -0.20 | 3.09E-01 |
| RP11-631N16.4  | 0.02  | 9.13E-01 | -0.20 | 3.09E-01 |
| RP11-69E11.4   | 0.00  | 9.87E-01 | -0.20 | 3.09E-01 |
| RP11-761N21.2  | 0.01  | 9.72E-01 | 0.20  | 3.09E-01 |

|                        |       |          |       |          |
|------------------------|-------|----------|-------|----------|
| <b>RP11-981G7.3</b>    | -0.12 | 5.44E-01 | -0.20 | 3.09E-01 |
| <b>SLC26A7</b>         | -0.02 | 9.20E-01 | -0.20 | 3.09E-01 |
| <b>SYT2</b>            | -0.20 | 3.03E-01 | -0.20 | 3.09E-01 |
| <b>ZNF202</b>          | -0.09 | 6.45E-01 | -0.20 | 3.09E-01 |
| <b>AL139333.1</b>      | 0.07  | 7.27E-01 | 0.20  | 3.10E-01 |
| <b>AOC3</b>            | 0.13  | 5.01E-01 | 0.20  | 3.10E-01 |
| <b>ARGLU1</b>          | -0.25 | 2.07E-01 | -0.20 | 3.10E-01 |
| <b>CHRNA3</b>          | -0.34 | 7.69E-02 | 0.20  | 3.10E-01 |
| <b>CLIP3</b>           | -0.19 | 3.25E-01 | 0.20  | 3.10E-01 |
| <b>CPSF3L</b>          | 0.24  | 2.20E-01 | 0.20  | 3.10E-01 |
| <b>CTA-250D13.1</b>    | 0.04  | 8.53E-01 | -0.20 | 3.10E-01 |
| <b>CTC-470E21.1</b>    | -0.03 | 8.67E-01 | 0.20  | 3.10E-01 |
| <b>CTD-2024F21.1</b>   | -0.08 | 6.72E-01 | -0.20 | 3.10E-01 |
| <b>CTD-2027I19.2</b>   | -0.17 | 3.96E-01 | -0.20 | 3.10E-01 |
| <b>DLX5</b>            | 0.04  | 8.48E-01 | 0.20  | 3.10E-01 |
| <b>FAM206A</b>         | 0.15  | 4.34E-01 | 0.20  | 3.10E-01 |
| <b>FLVCR2</b>          | 0.31  | 1.14E-01 | 0.20  | 3.10E-01 |
| <b>HCN1</b>            | -0.07 | 7.36E-01 | 0.20  | 3.10E-01 |
| <b>IGKV1-39</b>        | 0.41  | 2.86E-02 | 0.20  | 3.10E-01 |
| <b>IGLON5</b>          | -0.06 | 7.77E-01 | 0.20  | 3.10E-01 |
| <b>LINC00427</b>       | 0.06  | 7.43E-01 | -0.20 | 3.10E-01 |
| <b>MIEF2</b>           | 0.06  | 7.75E-01 | 0.20  | 3.10E-01 |
| <b>MLANA</b>           | -0.34 | 7.61E-02 | -0.20 | 3.10E-01 |
| <b>MME</b>             | 0.17  | 3.91E-01 | 0.20  | 3.10E-01 |
| <b>OXLD1</b>           | -0.08 | 7.01E-01 | 0.20  | 3.10E-01 |
| <b>PPP1R3F</b>         | 0.48  | 9.37E-03 | 0.20  | 3.10E-01 |
| <b>RNF187</b>          | 0.28  | 1.53E-01 | 0.20  | 3.10E-01 |
| <b>RP1-266L20.2</b>    | -0.11 | 5.70E-01 | -0.20 | 3.10E-01 |
| <b>RP11-266L9.4</b>    | -0.26 | 1.78E-01 | -0.20 | 3.10E-01 |
| <b>RP11-689J19.1</b>   | 0.36  | 6.33E-02 | 0.20  | 3.10E-01 |
| <b>RP11-7O11.3</b>     | 0.01  | 9.53E-01 | -0.20 | 3.10E-01 |
| <b>RP11-84A12.1</b>    | -0.06 | 7.71E-01 | -0.20 | 3.10E-01 |
| <b>RP4-673D20.3</b>    | -0.28 | 1.44E-01 | -0.20 | 3.10E-01 |
| <b>SIN3B</b>           | 0.04  | 8.36E-01 | 0.20  | 3.10E-01 |
| <b>TMEM101</b>         | 0.22  | 2.63E-01 | 0.20  | 3.10E-01 |
| <b>TRIM13</b>          | 0.19  | 3.34E-01 | 0.20  | 3.10E-01 |
| <b>XLOC_014192</b>     | -0.16 | 4.18E-01 | -0.20 | 3.10E-01 |
| <b>bac-BPGBPG55C2I</b> | -0.04 | 8.33E-01 | -0.20 | 3.10E-01 |
| <b>ZNF815P</b>         | -0.01 | 9.65E-01 | 0.20  | 3.10E-01 |
| <b>AC004854.4</b>      | -0.20 | 3.07E-01 | 0.20  | 3.10E-01 |
| <b>AP001429.1</b>      | 0.14  | 4.70E-01 | -0.20 | 3.10E-01 |
| <b>ASPDH</b>           | 0.31  | 1.05E-01 | 0.20  | 3.10E-01 |
| <b>BANK1</b>           | 0.41  | 3.20E-02 | 0.20  | 3.10E-01 |
| <b>C15orf39</b>        | -0.10 | 6.30E-01 | 0.20  | 3.10E-01 |
| <b>COX10</b>           | 0.29  | 1.34E-01 | 0.20  | 3.10E-01 |
| <b>DNAH14</b>          | -0.23 | 2.34E-01 | -0.20 | 3.10E-01 |
| <b>FGD5-AS1</b>        | -0.07 | 7.15E-01 | -0.20 | 3.10E-01 |

|               |       |          |       |          |
|---------------|-------|----------|-------|----------|
| G24464        | -0.19 | 3.34E-01 | -0.20 | 3.10E-01 |
| GOLGA8B       | -0.11 | 5.89E-01 | -0.20 | 3.10E-01 |
| HIST1H4I      | -0.18 | 3.51E-01 | 0.20  | 3.10E-01 |
| LINGO2        | -0.01 | 9.74E-01 | -0.20 | 3.10E-01 |
| MEF2A         | 0.17  | 4.00E-01 | 0.20  | 3.10E-01 |
| NAV2-AS5      | -0.12 | 5.58E-01 | 0.20  | 3.10E-01 |
| PANX2         | 0.25  | 1.98E-01 | 0.20  | 3.10E-01 |
| PPIP5K1       | 0.09  | 6.55E-01 | 0.20  | 3.10E-01 |
| PSMG3-AS1     | -0.10 | 6.20E-01 | 0.20  | 3.10E-01 |
| RASL11A       | 0.15  | 4.49E-01 | 0.20  | 3.10E-01 |
| REV3L         | 0.00  | 9.93E-01 | -0.20 | 3.10E-01 |
| RP11-214O1.3  | 0.14  | 4.80E-01 | 0.20  | 3.10E-01 |
| RP11-269G24.2 | -0.01 | 9.49E-01 | -0.20 | 3.10E-01 |
| RP11-471L13.3 | -0.46 | 1.33E-02 | -0.20 | 3.10E-01 |
| RP11-572O17.1 | 0.08  | 6.88E-01 | -0.20 | 3.10E-01 |
| RP11-981G7.6  | -0.10 | 6.04E-01 | -0.20 | 3.10E-01 |
| RPL21P10      | -0.37 | 5.54E-02 | 0.20  | 3.10E-01 |
| SCUBE1        | 0.14  | 4.72E-01 | -0.20 | 3.10E-01 |
| SH3PXD2A      | 0.02  | 9.08E-01 | 0.20  | 3.10E-01 |
| SLC5A9        | -0.31 | 1.11E-01 | -0.20 | 3.10E-01 |
| TOB2          | 0.03  | 8.64E-01 | 0.20  | 3.10E-01 |
| XLOC_005110   | -0.03 | 8.74E-01 | -0.20 | 3.10E-01 |
| CDK17         | 0.28  | 1.45E-01 | -0.20 | 3.11E-01 |
| ESCO1         | 0.07  | 7.18E-01 | -0.20 | 3.11E-01 |
| FAM13A-AS1    | -0.16 | 4.25E-01 | -0.20 | 3.11E-01 |
| HDHD2         | -0.07 | 7.20E-01 | -0.20 | 3.11E-01 |
| HOXD3         | 0.14  | 4.93E-01 | -0.20 | 3.11E-01 |
| LMNA          | -0.11 | 5.61E-01 | -0.20 | 3.11E-01 |
| RN7SL444P     | 0.04  | 8.35E-01 | -0.20 | 3.11E-01 |
| RPS24P12      | -0.18 | 3.55E-01 | -0.20 | 3.11E-01 |
| SLC38A1       | 0.18  | 3.60E-01 | -0.20 | 3.11E-01 |
| ZCWPW2        | -0.10 | 6.28E-01 | -0.20 | 3.11E-01 |
| AC003991.3    | 0.24  | 2.20E-01 | 0.20  | 3.11E-01 |
| AC005387.3    | -0.11 | 5.62E-01 | 0.20  | 3.11E-01 |
| BATF2         | 0.34  | 7.42E-02 | 0.20  | 3.11E-01 |
| C3orf62       | 0.09  | 6.58E-01 | 0.20  | 3.11E-01 |
| CSF2RB        | 0.14  | 4.71E-01 | 0.20  | 3.11E-01 |
| ENAH          | 0.27  | 1.67E-01 | 0.20  | 3.11E-01 |
| H3F3A         | 0.09  | 6.48E-01 | 0.20  | 3.11E-01 |
| IL18RAP       | 0.19  | 3.25E-01 | 0.20  | 3.11E-01 |
| IL36A         | 0.31  | 1.05E-01 | 0.20  | 3.11E-01 |
| PHBP19        | -0.19 | 3.24E-01 | 0.20  | 3.11E-01 |
| PRKCH         | 0.27  | 1.62E-01 | 0.20  | 3.11E-01 |
| RBBP8NL       | 0.13  | 5.06E-01 | 0.20  | 3.11E-01 |
| RNU6-60P      | 0.14  | 4.65E-01 | 0.20  | 3.11E-01 |
| STEAP3        | 0.48  | 1.06E-02 | 0.20  | 3.11E-01 |
| ABC8          | -0.05 | 7.93E-01 | 0.20  | 3.12E-01 |

|                |       |          |       |          |
|----------------|-------|----------|-------|----------|
| AC108861.1     | -0.08 | 6.76E-01 | -0.20 | 3.12E-01 |
| ACOT2          | -0.03 | 8.82E-01 | -0.20 | 3.12E-01 |
| AQP8           | -0.05 | 7.95E-01 | 0.20  | 3.12E-01 |
| CAPN1          | 0.33  | 8.90E-02 | 0.20  | 3.12E-01 |
| CTB-134F13.1   | -0.02 | 9.14E-01 | -0.20 | 3.12E-01 |
| FAM183A        | -0.02 | 9.26E-01 | -0.20 | 3.12E-01 |
| LINC00176      | 0.02  | 9.16E-01 | -0.20 | 3.12E-01 |
| MCTP1          | 0.05  | 8.13E-01 | 0.20  | 3.12E-01 |
| PDP1           | 0.18  | 3.51E-01 | 0.20  | 3.12E-01 |
| PGBD2          | 0.04  | 8.33E-01 | -0.20 | 3.12E-01 |
| PRDX3P4        | -0.23 | 2.36E-01 | -0.20 | 3.12E-01 |
| RP11-1060J15.4 | 0.02  | 9.04E-01 | -0.20 | 3.12E-01 |
| RP11-1072C15.6 | 0.01  | 9.63E-01 | -0.20 | 3.12E-01 |
| RP11-158H5.8   | -0.44 | 1.96E-02 | -0.20 | 3.12E-01 |
| RP11-321G12.1  | 0.19  | 3.30E-01 | -0.20 | 3.12E-01 |
| RP11-649A18.5  | 0.04  | 8.46E-01 | -0.20 | 3.12E-01 |
| SAV1           | -0.02 | 9.33E-01 | 0.20  | 3.12E-01 |
| SDS            | -0.24 | 2.13E-01 | -0.20 | 3.12E-01 |
| SERPINC1       | -0.14 | 4.73E-01 | -0.20 | 3.12E-01 |
| SFRP4          | -0.27 | 1.66E-01 | 0.20  | 3.12E-01 |
| SLC35F3        | 0.04  | 8.58E-01 | -0.20 | 3.12E-01 |
| SNORA84        | 0.14  | 4.91E-01 | 0.20  | 3.12E-01 |
| TMEM256P2      | 0.34  | 7.95E-02 | 0.20  | 3.12E-01 |
| XLOC_005458    | 0.17  | 3.90E-01 | -0.20 | 3.12E-01 |
| ZNF767P        | -0.11 | 5.75E-01 | -0.20 | 3.12E-01 |
| ZNF888         | -0.01 | 9.71E-01 | -0.20 | 3.12E-01 |
| ZSCAN26        | 0.11  | 5.65E-01 | 0.20  | 3.12E-01 |
| AC074375.1     | -0.01 | 9.64E-01 | -0.20 | 3.13E-01 |
| AP000487.5     | -0.03 | 8.89E-01 | 0.20  | 3.13E-01 |
| ARHGAP5        | 0.41  | 2.93E-02 | 0.20  | 3.13E-01 |
| CTD-2562J17.6  | 0.47  | 1.07E-02 | 0.20  | 3.13E-01 |
| DNAAF3         | -0.25 | 2.08E-01 | -0.20 | 3.13E-01 |
| IDH3G          | -0.05 | 8.01E-01 | 0.20  | 3.13E-01 |
| KB-1589B1.4    | -0.02 | 9.37E-01 | 0.20  | 3.13E-01 |
| KRT75          | 0.25  | 2.01E-01 | 0.20  | 3.13E-01 |
| PIEZO1         | -0.09 | 6.47E-01 | 0.20  | 3.13E-01 |
| RNU4-31P       | 0.19  | 3.39E-01 | 0.20  | 3.13E-01 |
| RNU6-510P      | 0.15  | 4.36E-01 | -0.20 | 3.13E-01 |
| RNU6-610P      | -0.19 | 3.20E-01 | -0.20 | 3.13E-01 |
| RP1-193H18.3   | -0.50 | 6.37E-03 | 0.20  | 3.13E-01 |
| RP11-29H23.7   | 0.32  | 9.56E-02 | -0.20 | 3.13E-01 |
| RP11-44N11.2   | -0.12 | 5.56E-01 | 0.20  | 3.13E-01 |
| SMIM18         | 0.12  | 5.28E-01 | -0.20 | 3.13E-01 |
| SNORA7B        | 0.18  | 3.62E-01 | 0.20  | 3.13E-01 |
| SNORD83A       | 0.24  | 2.12E-01 | 0.20  | 3.13E-01 |
| SPSB3          | -0.19 | 3.41E-01 | -0.20 | 3.13E-01 |
| SULF1          | -0.51 | 5.77E-03 | 0.20  | 3.13E-01 |

|               |       |          |       |          |
|---------------|-------|----------|-------|----------|
| SUMO3         | 0.02  | 9.10E-01 | 0.20  | 3.13E-01 |
| UBA52P8       | -0.14 | 4.82E-01 | -0.20 | 3.13E-01 |
| ZMYND19P1     | 0.05  | 7.98E-01 | -0.20 | 3.13E-01 |
| AC103881.1    | -0.07 | 7.35E-01 | -0.20 | 3.13E-01 |
| BRI3          | -0.01 | 9.46E-01 | -0.20 | 3.13E-01 |
| CTC-459F4.1   | 0.12  | 5.41E-01 | -0.20 | 3.13E-01 |
| CTD-2278I10.4 | 0.24  | 2.10E-01 | -0.20 | 3.13E-01 |
| G11194        | -0.06 | 7.62E-01 | -0.20 | 3.13E-01 |
| ODF2          | 0.09  | 6.32E-01 | -0.20 | 3.13E-01 |
| RAB11FIP1     | -0.19 | 3.41E-01 | -0.20 | 3.13E-01 |
| RP3-453C12.8  | -0.13 | 5.24E-01 | -0.20 | 3.13E-01 |
| TM9SF2        | 0.04  | 8.29E-01 | -0.20 | 3.13E-01 |
| AC007950.2    | -0.23 | 2.29E-01 | 0.20  | 3.13E-01 |
| AC016582.2    | -0.13 | 5.01E-01 | 0.20  | 3.13E-01 |
| AKIRIN2       | 0.32  | 9.96E-02 | 0.20  | 3.13E-01 |
| FBXL6         | 0.01  | 9.68E-01 | 0.20  | 3.13E-01 |
| GPR171        | 0.27  | 1.62E-01 | 0.20  | 3.13E-01 |
| NPR2          | 0.13  | 5.04E-01 | 0.20  | 3.13E-01 |
| RAMP3         | -0.17 | 3.98E-01 | 0.20  | 3.13E-01 |
| RP11-38G5.4   | -0.22 | 2.51E-01 | 0.20  | 3.13E-01 |
| RP11-49K24.4  | -0.30 | 1.18E-01 | 0.20  | 3.13E-01 |
| RP11-541P9.3  | 0.07  | 7.26E-01 | 0.20  | 3.13E-01 |
| SATB1         | 0.05  | 8.00E-01 | 0.20  | 3.13E-01 |
| VAV3          | -0.10 | 6.29E-01 | 0.20  | 3.13E-01 |
| ABCD2         | 0.25  | 1.91E-01 | 0.20  | 3.14E-01 |
| ACOT11        | 0.15  | 4.58E-01 | 0.20  | 3.14E-01 |
| FAM149B1      | -0.10 | 6.12E-01 | -0.20 | 3.14E-01 |
| GPR34         | 0.08  | 6.81E-01 | 0.20  | 3.14E-01 |
| ITIH3         | -0.23 | 2.44E-01 | -0.20 | 3.14E-01 |
| KB-1507C5.4   | -0.10 | 5.99E-01 | -0.20 | 3.14E-01 |
| POLR2KP1      | 0.00  | 9.92E-01 | -0.20 | 3.14E-01 |
| RP1-95L4.4    | 0.04  | 8.49E-01 | 0.20  | 3.14E-01 |
| RP11-429P3.8  | 0.10  | 6.04E-01 | -0.20 | 3.14E-01 |
| RP11-669M16.1 | -0.04 | 8.40E-01 | -0.20 | 3.14E-01 |
| RP11-99E15.2  | 0.03  | 8.63E-01 | 0.20  | 3.14E-01 |
| RP3-492J12.2  | 0.06  | 7.50E-01 | 0.20  | 3.14E-01 |
| RPLP0P2       | -0.32 | 1.01E-01 | -0.20 | 3.14E-01 |
| SPATA33       | -0.09 | 6.59E-01 | -0.20 | 3.14E-01 |
| XKR8          | 0.22  | 2.65E-01 | 0.20  | 3.14E-01 |
| ZNF668        | 0.30  | 1.16E-01 | 0.20  | 3.14E-01 |
| AC008079.10   | -0.07 | 7.10E-01 | -0.20 | 3.15E-01 |
| AC092687.5    | 0.36  | 5.94E-02 | -0.20 | 3.15E-01 |
| ANKRD6        | -0.11 | 5.67E-01 | -0.20 | 3.15E-01 |
| BNIP3P39      | -0.22 | 2.66E-01 | -0.20 | 3.15E-01 |
| CTD-3222D19.4 | -0.10 | 6.21E-01 | -0.20 | 3.15E-01 |
| DNASE1L2      | -0.03 | 8.68E-01 | 0.20  | 3.15E-01 |
| ECE1          | 0.11  | 5.92E-01 | 0.20  | 3.15E-01 |

|               |       |          |       |          |
|---------------|-------|----------|-------|----------|
| ELP4          | -0.11 | 5.87E-01 | -0.20 | 3.15E-01 |
| FAM174A       | 0.17  | 3.90E-01 | -0.20 | 3.15E-01 |
| FAM24B        | 0.03  | 8.62E-01 | -0.20 | 3.15E-01 |
| G40988        | -0.12 | 5.27E-01 | 0.20  | 3.15E-01 |
| HOXD10        | -0.12 | 5.55E-01 | -0.20 | 3.15E-01 |
| ISYNA1        | -0.10 | 5.95E-01 | 0.20  | 3.15E-01 |
| MFAP4         | -0.19 | 3.31E-01 | 0.20  | 3.15E-01 |
| MIR4786       | 0.29  | 1.29E-01 | -0.20 | 3.15E-01 |
| RP11-100L22.1 | -0.26 | 1.75E-01 | -0.20 | 3.15E-01 |
| RP11-38L15.3  | -0.01 | 9.67E-01 | -0.20 | 3.15E-01 |
| RP11-549B18.1 | 0.04  | 8.39E-01 | -0.20 | 3.15E-01 |
| RP11-689B22.2 | -0.07 | 7.28E-01 | -0.20 | 3.15E-01 |
| RP5-965G21.6  | -0.25 | 2.04E-01 | -0.20 | 3.15E-01 |
| RPS11P5       | -0.13 | 5.11E-01 | 0.20  | 3.15E-01 |
| RUNX1         | 0.08  | 6.94E-01 | 0.20  | 3.15E-01 |
| ACSBG1        | -0.19 | 3.41E-01 | -0.20 | 3.16E-01 |
| DIRAS2        | -0.12 | 5.31E-01 | -0.20 | 3.16E-01 |
| EXOSC1        | 0.18  | 3.66E-01 | 0.20  | 3.16E-01 |
| GATA2         | -0.04 | 8.24E-01 | -0.20 | 3.16E-01 |
| GLB1L3        | 0.17  | 3.96E-01 | 0.20  | 3.16E-01 |
| GPR180        | -0.07 | 7.14E-01 | -0.20 | 3.16E-01 |
| MGARP         | 0.18  | 3.64E-01 | 0.20  | 3.16E-01 |
| OCLM          | -0.07 | 7.16E-01 | -0.20 | 3.16E-01 |
| PRKCD         | 0.05  | 8.08E-01 | 0.20  | 3.16E-01 |
| RP11-368P15.1 | -0.37 | 5.35E-02 | -0.20 | 3.16E-01 |
| RP5-1047A19.4 | 0.18  | 3.66E-01 | -0.20 | 3.16E-01 |
| STARD4        | 0.32  | 9.93E-02 | 0.20  | 3.16E-01 |
| ALX4          | -0.09 | 6.66E-01 | -0.20 | 3.16E-01 |
| C14orf1       | 0.22  | 2.56E-01 | 0.20  | 3.16E-01 |
| DPH6          | 0.00  | 9.80E-01 | -0.20 | 3.16E-01 |
| ERO1A         | 0.22  | 2.68E-01 | 0.20  | 3.16E-01 |
| FGD1          | 0.12  | 5.27E-01 | 0.20  | 3.16E-01 |
| HK1           | 0.09  | 6.57E-01 | 0.20  | 3.16E-01 |
| HSD3B1        | 0.19  | 3.44E-01 | 0.20  | 3.16E-01 |
| KLF3          | 0.12  | 5.32E-01 | 0.20  | 3.16E-01 |
| NPIPA5        | -0.11 | 5.67E-01 | 0.20  | 3.16E-01 |
| NPM1P26       | 0.18  | 3.55E-01 | -0.20 | 3.16E-01 |
| NR2F2-AS1     | 0.05  | 8.05E-01 | 0.20  | 3.16E-01 |
| POLH          | 0.17  | 3.93E-01 | 0.20  | 3.16E-01 |
| RP11-162A12.2 | 0.28  | 1.48E-01 | 0.20  | 3.16E-01 |
| RP11-706P11.2 | -0.01 | 9.55E-01 | -0.20 | 3.16E-01 |
| RP11-8L8.2    | 0.21  | 2.91E-01 | 0.20  | 3.16E-01 |
| RP5-1029F21.2 | -0.24 | 2.28E-01 | -0.20 | 3.16E-01 |
| SKAP1         | 0.20  | 3.00E-01 | 0.20  | 3.16E-01 |
| AC016708.2    | 0.21  | 2.85E-01 | 0.20  | 3.17E-01 |
| ARHGEF34P     | 0.33  | 8.48E-02 | 0.20  | 3.17E-01 |
| ATP6AP1L      | -0.13 | 5.04E-01 | -0.20 | 3.17E-01 |



|                |       |          |       |          |
|----------------|-------|----------|-------|----------|
| BTN2A1         | -0.15 | 4.56E-01 | -0.20 | 3.17E-01 |
| CCDC34         | -0.06 | 7.47E-01 | -0.20 | 3.17E-01 |
| CLPX           | 0.12  | 5.52E-01 | 0.20  | 3.17E-01 |
| G29700         | -0.03 | 8.95E-01 | -0.20 | 3.17E-01 |
| G41779         | -0.05 | 7.87E-01 | -0.20 | 3.17E-01 |
| GPR22          | -0.18 | 3.55E-01 | -0.20 | 3.17E-01 |
| KRT8P31        | 0.09  | 6.67E-01 | 0.20  | 3.17E-01 |
| PLCL1          | -0.11 | 5.92E-01 | 0.20  | 3.17E-01 |
| RP11-1112J20.2 | 0.34  | 7.27E-02 | 0.20  | 3.17E-01 |
| RP11-800A3.4   | 0.24  | 2.18E-01 | 0.20  | 3.17E-01 |
| RP11-91P24.3   | 0.08  | 6.93E-01 | 0.20  | 3.17E-01 |
| XLOC_004673    | -0.07 | 7.22E-01 | 0.20  | 3.17E-01 |
| ZBED6          | 0.01  | 9.71E-01 | 0.20  | 3.17E-01 |
| AC000403.4     | 0.19  | 3.44E-01 | -0.20 | 3.18E-01 |
| AC130469.1     | -0.11 | 5.92E-01 | 0.20  | 3.18E-01 |
| CEP162         | -0.40 | 3.49E-02 | -0.20 | 3.18E-01 |
| COL6A2         | -0.26 | 1.74E-01 | 0.20  | 3.18E-01 |
| CPPED1         | -0.04 | 8.33E-01 | 0.20  | 3.18E-01 |
| DOCK5          | -0.20 | 3.19E-01 | -0.20 | 3.18E-01 |
| KDM3A          | -0.15 | 4.54E-01 | -0.20 | 3.18E-01 |
| PLXND1         | -0.21 | 2.93E-01 | 0.20  | 3.18E-01 |
| PSAT1P3        | 0.06  | 7.61E-01 | 0.20  | 3.18E-01 |
| PTGES2         | 0.26  | 1.75E-01 | 0.20  | 3.18E-01 |
| RMI2           | -0.08 | 6.93E-01 | 0.20  | 3.18E-01 |
| RNU6-1282P     | -0.14 | 4.93E-01 | -0.20 | 3.18E-01 |
| SETBP1         | 0.01  | 9.58E-01 | 0.20  | 3.18E-01 |
| TMEM189        | 0.02  | 9.31E-01 | -0.20 | 3.18E-01 |
| TMEM231        | 0.14  | 4.72E-01 | -0.20 | 3.18E-01 |
| TRAV4          | 0.26  | 1.88E-01 | -0.20 | 3.18E-01 |
| ZNF281         | 0.18  | 3.49E-01 | 0.20  | 3.18E-01 |
| ZNF300         | -0.05 | 7.92E-01 | -0.20 | 3.18E-01 |
| CCT7P1         | -0.12 | 5.45E-01 | -0.20 | 3.19E-01 |
| CTD-2349P21.6  | -0.08 | 6.68E-01 | -0.20 | 3.19E-01 |
| CTD-3065J16.6  | 0.00  | 9.90E-01 | -0.20 | 3.19E-01 |
| DPH7           | -0.07 | 7.32E-01 | -0.20 | 3.19E-01 |
| MORF4L2        | 0.09  | 6.67E-01 | -0.20 | 3.19E-01 |
| RP11-182J23.1  | 0.03  | 8.66E-01 | -0.20 | 3.19E-01 |
| RP11-31H5.3    | 0.06  | 7.73E-01 | -0.20 | 3.19E-01 |
| RP3-477O4.14   | 0.01  | 9.66E-01 | -0.20 | 3.19E-01 |
| RRP15          | 0.08  | 6.84E-01 | -0.20 | 3.19E-01 |
| SMARCA1        | -0.10 | 6.10E-01 | -0.20 | 3.19E-01 |
| AC156455.1     | -0.15 | 4.34E-01 | 0.20  | 3.19E-01 |
| ACOX3          | 0.46  | 1.35E-02 | 0.20  | 3.19E-01 |
| ANKRD13D       | -0.19 | 3.25E-01 | 0.20  | 3.19E-01 |
| CFAP44-AS1     | -0.24 | 2.10E-01 | 0.20  | 3.19E-01 |
| CTC-490G23.2   | 0.23  | 2.36E-01 | 0.20  | 3.19E-01 |
| DHFRP1         | 0.07  | 7.05E-01 | 0.20  | 3.19E-01 |

|               |       |          |       |          |
|---------------|-------|----------|-------|----------|
| MIR4782       | 0.00  | 9.91E-01 | 0.20  | 3.19E-01 |
| SLC10A6       | 0.31  | 1.07E-01 | 0.20  | 3.19E-01 |
| AC007787.2    | -0.07 | 7.05E-01 | -0.20 | 3.19E-01 |
| AC062029.1    | 0.03  | 8.61E-01 | 0.20  | 3.19E-01 |
| AC104781.1    | -0.23 | 2.35E-01 | 0.20  | 3.19E-01 |
| AOX2P         | 0.29  | 1.38E-01 | 0.20  | 3.19E-01 |
| BIRC2         | 0.15  | 4.56E-01 | 0.20  | 3.19E-01 |
| CSTF2         | 0.23  | 2.45E-01 | 0.20  | 3.19E-01 |
| DGCR2         | 0.14  | 4.93E-01 | 0.20  | 3.19E-01 |
| DIS3L         | 0.02  | 9.25E-01 | -0.20 | 3.19E-01 |
| FCRLA         | -0.19 | 3.42E-01 | -0.20 | 3.19E-01 |
| G39805        | -0.13 | 5.17E-01 | -0.20 | 3.19E-01 |
| GALNT4        | 0.50  | 6.86E-03 | 0.20  | 3.19E-01 |
| IMPG1         | -0.37 | 5.29E-02 | -0.20 | 3.19E-01 |
| MATN4         | -0.14 | 4.92E-01 | -0.20 | 3.19E-01 |
| RP11-21B23.2  | -0.18 | 3.48E-01 | -0.20 | 3.19E-01 |
| RP11-290C10.1 | 0.05  | 7.85E-01 | -0.20 | 3.19E-01 |
| RP11-530A18.1 | -0.41 | 3.22E-02 | -0.20 | 3.19E-01 |
| RPL13P6       | -0.04 | 8.23E-01 | -0.20 | 3.19E-01 |
| RPS4XP22      | -0.16 | 4.24E-01 | 0.20  | 3.19E-01 |
| TMEM39B       | 0.28  | 1.46E-01 | 0.20  | 3.19E-01 |
| ZNF771        | 0.15  | 4.59E-01 | 0.20  | 3.19E-01 |
| ZNF800        | 0.03  | 8.75E-01 | -0.20 | 3.19E-01 |
| AK3P5         | 0.25  | 2.00E-01 | -0.20 | 3.20E-01 |
| C8orf17       | -0.12 | 5.32E-01 | -0.20 | 3.20E-01 |
| CTC-459F4.3   | -0.05 | 7.91E-01 | -0.20 | 3.20E-01 |
| EPM2A         | 0.25  | 1.97E-01 | -0.20 | 3.20E-01 |
| HHEX          | 0.00  | 9.98E-01 | -0.20 | 3.20E-01 |
| RP11-35J10.4  | -0.36 | 5.86E-02 | -0.20 | 3.20E-01 |
| RP11-950K24.2 | -0.15 | 4.38E-01 | -0.20 | 3.20E-01 |
| RPL24         | 0.06  | 7.77E-01 | -0.20 | 3.20E-01 |
| SLC7A6OS      | -0.19 | 3.44E-01 | -0.20 | 3.20E-01 |
| ZDHHC6        | 0.23  | 2.37E-01 | -0.20 | 3.20E-01 |
| AC007041.2    | -0.11 | 5.65E-01 | 0.20  | 3.20E-01 |
| AC078883.3    | 0.27  | 1.60E-01 | 0.20  | 3.20E-01 |
| HLA-DMB       | 0.01  | 9.76E-01 | 0.20  | 3.20E-01 |
| HOXB-AS1      | -0.04 | 8.49E-01 | 0.20  | 3.20E-01 |
| MMP12         | 0.18  | 3.54E-01 | 0.20  | 3.20E-01 |
| PRCP          | 0.05  | 8.08E-01 | 0.20  | 3.20E-01 |
| PSMB10        | 0.31  | 1.04E-01 | 0.20  | 3.20E-01 |
| RP11-298J20.4 | -0.16 | 4.27E-01 | 0.20  | 3.20E-01 |
| RP11-782C8.4  | 0.08  | 6.77E-01 | 0.20  | 3.20E-01 |
| TSPAN12       | -0.27 | 1.73E-01 | 0.20  | 3.20E-01 |
| UGT1A7        | 0.00  | 9.87E-01 | 0.20  | 3.20E-01 |
| AEBP2         | 0.20  | 2.97E-01 | 0.20  | 3.21E-01 |
| ALG1L2        | 0.26  | 1.87E-01 | 0.20  | 3.21E-01 |
| AMOTL1        | -0.05 | 7.96E-01 | 0.20  | 3.21E-01 |

|                |       |          |       |          |
|----------------|-------|----------|-------|----------|
| C9orf114       | 0.01  | 9.65E-01 | 0.20  | 3.21E-01 |
| CCSER1         | -0.44 | 1.78E-02 | -0.20 | 3.21E-01 |
| CCSER2         | -0.08 | 6.83E-01 | -0.20 | 3.21E-01 |
| CTD-3105H18.18 | -0.02 | 9.05E-01 | 0.20  | 3.21E-01 |
| DSG1           | -0.01 | 9.54E-01 | 0.20  | 3.21E-01 |
| HLA-DMA        | 0.32  | 9.56E-02 | 0.20  | 3.21E-01 |
| JKAMP          | 0.11  | 5.66E-01 | 0.20  | 3.21E-01 |
| KRT33B         | -0.22 | 2.68E-01 | 0.20  | 3.21E-01 |
| LINC00339      | 0.08  | 7.00E-01 | 0.20  | 3.21E-01 |
| LINC01126      | 0.19  | 3.39E-01 | -0.20 | 3.21E-01 |
| PAWR           | 0.17  | 3.85E-01 | -0.20 | 3.21E-01 |
| PCSK5          | -0.40 | 3.33E-02 | -0.20 | 3.21E-01 |
| PPM1E          | -0.20 | 3.12E-01 | -0.20 | 3.21E-01 |
| RNU2-64P       | 0.18  | 3.57E-01 | 0.20  | 3.21E-01 |
| RP11-345P4.6   | -0.10 | 6.07E-01 | -0.20 | 3.21E-01 |
| RP11-432I5.4   | -0.13 | 5.08E-01 | 0.20  | 3.21E-01 |
| RP11-501M7.1   | -0.28 | 1.50E-01 | 0.20  | 3.21E-01 |
| RP11-529E10.7  | 0.01  | 9.66E-01 | -0.20 | 3.21E-01 |
| SH3GLB1        | 0.12  | 5.43E-01 | -0.20 | 3.21E-01 |
| SRSF9P1        | 0.28  | 1.51E-01 | 0.20  | 3.21E-01 |
| TLR8           | 0.31  | 1.04E-01 | 0.20  | 3.21E-01 |
| TMEM57         | 0.23  | 2.36E-01 | 0.20  | 3.21E-01 |
| TSSC1-IT1      | 0.02  | 9.17E-01 | -0.20 | 3.21E-01 |
| ABCC2          | -0.17 | 4.01E-01 | 0.20  | 3.22E-01 |
| AKAP11         | 0.08  | 6.78E-01 | -0.20 | 3.22E-01 |
| CTC-204F22.1   | -0.05 | 7.87E-01 | -0.20 | 3.22E-01 |
| CTD-2589H19.6  | -0.09 | 6.65E-01 | 0.20  | 3.22E-01 |
| CTNNA2         | -0.36 | 6.18E-02 | 0.20  | 3.22E-01 |
| FRZB           | 0.10  | 6.20E-01 | -0.20 | 3.22E-01 |
| GNPTG          | -0.04 | 8.50E-01 | 0.20  | 3.22E-01 |
| HAPLN2         | -0.09 | 6.64E-01 | -0.20 | 3.22E-01 |
| LILRB2         | -0.07 | 7.38E-01 | 0.20  | 3.22E-01 |
| MCC            | -0.22 | 2.51E-01 | -0.20 | 3.22E-01 |
| MIR302C        | 0.07  | 7.18E-01 | -0.20 | 3.22E-01 |
| MYLK4          | 0.35  | 7.12E-02 | -0.20 | 3.22E-01 |
| PRRG4          | 0.39  | 4.23E-02 | 0.20  | 3.22E-01 |
| RHEBL1         | -0.09 | 6.38E-01 | -0.20 | 3.22E-01 |
| RNU6-223P      | -0.05 | 8.00E-01 | 0.20  | 3.22E-01 |
| RP11-1007J8.1  | -0.02 | 9.24E-01 | 0.20  | 3.22E-01 |
| RP11-208G20.2  | -0.51 | 6.05E-03 | -0.20 | 3.22E-01 |
| RP11-649A18.12 | 0.15  | 4.45E-01 | 0.20  | 3.22E-01 |
| RP11-774O3.3   | 0.33  | 9.04E-02 | -0.20 | 3.22E-01 |
| RPL12P4        | 0.05  | 7.85E-01 | 0.20  | 3.22E-01 |
| RPL29P12       | 0.11  | 5.85E-01 | -0.20 | 3.22E-01 |
| S1PR2          | 0.28  | 1.44E-01 | 0.20  | 3.22E-01 |
| ABCA13         | 0.04  | 8.22E-01 | -0.20 | 3.22E-01 |
| AC005540.3     | 0.01  | 9.59E-01 | -0.20 | 3.22E-01 |

|               |       |          |       |          |
|---------------|-------|----------|-------|----------|
| AC008991.1    | -0.34 | 7.51E-02 | -0.20 | 3.22E-01 |
| BMP4          | -0.18 | 3.70E-01 | 0.20  | 3.22E-01 |
| C1orf74       | 0.01  | 9.42E-01 | -0.20 | 3.22E-01 |
| CCDC183-AS1   | 0.05  | 7.91E-01 | 0.20  | 3.22E-01 |
| CTH           | -0.18 | 3.61E-01 | 0.20  | 3.22E-01 |
| FAM20A        | 0.19  | 3.41E-01 | 0.20  | 3.22E-01 |
| FRMD4B        | -0.12 | 5.53E-01 | 0.20  | 3.22E-01 |
| GALR3         | -0.10 | 6.06E-01 | -0.20 | 3.22E-01 |
| GCGR          | 0.08  | 6.85E-01 | 0.20  | 3.22E-01 |
| LIG1          | -0.08 | 6.88E-01 | -0.20 | 3.22E-01 |
| MED21         | 0.12  | 5.29E-01 | 0.20  | 3.22E-01 |
| NDUF4F4P3     | -0.06 | 7.44E-01 | -0.20 | 3.22E-01 |
| PPP2R2D       | 0.23  | 2.47E-01 | -0.20 | 3.22E-01 |
| PSPC1         | 0.21  | 2.94E-01 | 0.20  | 3.22E-01 |
| RP11-119F19.4 | -0.30 | 1.25E-01 | -0.20 | 3.22E-01 |
| RP11-162A12.3 | 0.13  | 5.19E-01 | -0.20 | 3.22E-01 |
| RP11-254I22.1 | -0.23 | 2.47E-01 | -0.20 | 3.22E-01 |
| RP11-552F3.9  | 0.01  | 9.58E-01 | 0.20  | 3.22E-01 |
| RP11-560J1.2  | -0.13 | 5.02E-01 | 0.20  | 3.22E-01 |
| RP11-631N16.2 | 0.26  | 1.75E-01 | -0.20 | 3.22E-01 |
| RP11-849F2.7  | -0.04 | 8.37E-01 | -0.20 | 3.22E-01 |
| RP11-862L9.3  | -0.14 | 4.87E-01 | -0.20 | 3.22E-01 |
| SERPINA3      | 0.28  | 1.46E-01 | 0.20  | 3.22E-01 |
| SLC45A2       | -0.21 | 2.78E-01 | -0.20 | 3.22E-01 |
| TGM5          | -0.09 | 6.51E-01 | 0.20  | 3.22E-01 |
| TLE2          | 0.04  | 8.54E-01 | -0.20 | 3.22E-01 |
| TNFAIP8L2     | 0.11  | 5.61E-01 | 0.20  | 3.22E-01 |
| AARS          | 0.10  | 6.07E-01 | 0.20  | 3.23E-01 |
| AC008440.10   | -0.09 | 6.53E-01 | -0.20 | 3.23E-01 |
| ANG           | 0.05  | 7.93E-01 | -0.20 | 3.23E-01 |
| ANKMY1        | -0.17 | 3.99E-01 | -0.20 | 3.23E-01 |
| DEPDC7        | 0.31  | 1.06E-01 | 0.20  | 3.23E-01 |
| KCND3-IT1     | 0.05  | 7.91E-01 | -0.20 | 3.23E-01 |
| LINC00278     | 0.39  | 3.82E-02 | 0.20  | 3.23E-01 |
| MIS18A-AS1    | 0.03  | 8.70E-01 | -0.20 | 3.23E-01 |
| NNAT          | 0.12  | 5.41E-01 | -0.20 | 3.23E-01 |
| P2RY4         | -0.30 | 1.15E-01 | -0.20 | 3.23E-01 |
| RP11-139H14.5 | -0.02 | 9.29E-01 | -0.20 | 3.23E-01 |
| RP11-162J8.3  | 0.06  | 7.72E-01 | 0.20  | 3.23E-01 |
| RP11-923I11.4 | -0.33 | 8.81E-02 | 0.20  | 3.23E-01 |
| RP5-837M10.4  | 0.13  | 4.99E-01 | -0.20 | 3.23E-01 |
| SGCZ          | 0.18  | 3.63E-01 | 0.20  | 3.23E-01 |
| TAB2          | -0.15 | 4.50E-01 | 0.20  | 3.23E-01 |
| TOM1L2        | -0.08 | 7.04E-01 | 0.20  | 3.23E-01 |
| TRAF5         | -0.18 | 3.66E-01 | -0.20 | 3.23E-01 |
| AC074391.1    | -0.09 | 6.49E-01 | -0.20 | 3.24E-01 |
| ATF7          | -0.27 | 1.67E-01 | 0.20  | 3.24E-01 |

|                |       |          |       |          |
|----------------|-------|----------|-------|----------|
| DNTTIP2        | 0.03  | 8.66E-01 | -0.20 | 3.24E-01 |
| MAMDC2-AS1     | -0.24 | 2.25E-01 | -0.20 | 3.24E-01 |
| MIR5096        | -0.06 | 7.80E-01 | 0.20  | 3.24E-01 |
| MSANTD3        | -0.02 | 9.35E-01 | 0.20  | 3.24E-01 |
| MZT2A          | 0.17  | 3.91E-01 | 0.20  | 3.24E-01 |
| OSBP           | -0.08 | 6.94E-01 | 0.20  | 3.24E-01 |
| PGBD1          | -0.04 | 8.25E-01 | 0.20  | 3.24E-01 |
| PTPN11         | -0.03 | 8.65E-01 | -0.20 | 3.24E-01 |
| RN7SL867P      | 0.13  | 5.04E-01 | 0.20  | 3.24E-01 |
| RP11-716H6.2   | -0.11 | 5.94E-01 | -0.20 | 3.24E-01 |
| RPL12P25       | -0.02 | 9.23E-01 | -0.20 | 3.24E-01 |
| RPS12P20       | 0.03  | 8.68E-01 | 0.20  | 3.24E-01 |
| SLAMF6         | 0.17  | 3.82E-01 | 0.20  | 3.24E-01 |
| SRCIN1         | 0.32  | 1.02E-01 | -0.20 | 3.24E-01 |
| TMA7           | 0.00  | 9.97E-01 | -0.20 | 3.24E-01 |
| EGR1           | 0.10  | 5.98E-01 | 0.20  | 3.25E-01 |
| MEX3A          | 0.35  | 6.52E-02 | 0.20  | 3.25E-01 |
| NCEH1          | 0.30  | 1.27E-01 | 0.20  | 3.25E-01 |
| PET100         | 0.23  | 2.34E-01 | 0.20  | 3.25E-01 |
| RP11-443F16.1  | -0.31 | 1.12E-01 | 0.20  | 3.25E-01 |
| SPINK6         | -0.06 | 7.80E-01 | 0.20  | 3.25E-01 |
| TIFAB          | 0.27  | 1.58E-01 | 0.20  | 3.25E-01 |
| AC007557.2     | -0.31 | 1.13E-01 | -0.20 | 3.25E-01 |
| APITD1         | 0.12  | 5.54E-01 | -0.20 | 3.25E-01 |
| PJA2           | -0.05 | 7.93E-01 | -0.20 | 3.25E-01 |
| RP11-16F15.2   | 0.03  | 8.68E-01 | -0.20 | 3.25E-01 |
| RP11-430C7.2   | 0.08  | 6.75E-01 | -0.20 | 3.25E-01 |
| RP11-639E23.1  | -0.17 | 3.76E-01 | -0.20 | 3.25E-01 |
| XLOC_008072    | 0.01  | 9.44E-01 | -0.20 | 3.25E-01 |
| ADO            | 0.24  | 2.20E-01 | 0.20  | 3.25E-01 |
| AL513547.1     | -0.30 | 1.19E-01 | 0.20  | 3.25E-01 |
| G38775         | 0.15  | 4.49E-01 | 0.20  | 3.25E-01 |
| KCTD9P5        | -0.15 | 4.51E-01 | 0.20  | 3.25E-01 |
| PCAT6          | 0.09  | 6.32E-01 | 0.20  | 3.25E-01 |
| PYCR1          | 0.10  | 6.08E-01 | 0.20  | 3.25E-01 |
| RP11-104L21.3  | 0.15  | 4.51E-01 | 0.20  | 3.25E-01 |
| RP11-1348G14.5 | -0.11 | 5.81E-01 | 0.20  | 3.25E-01 |
| SLC41A1        | 0.40  | 3.40E-02 | 0.20  | 3.25E-01 |
| AC004159.1     | -0.17 | 3.76E-01 | -0.20 | 3.25E-01 |
| AC128709.4     | -0.05 | 7.91E-01 | -0.20 | 3.25E-01 |
| COL5A1-AS1     | 0.11  | 5.64E-01 | -0.20 | 3.25E-01 |
| CWF19L2        | 0.16  | 4.10E-01 | -0.20 | 3.25E-01 |
| ELL3           | -0.06 | 7.68E-01 | -0.20 | 3.25E-01 |
| KRT9           | -0.05 | 7.84E-01 | -0.20 | 3.25E-01 |
| MBIP           | -0.27 | 1.58E-01 | -0.20 | 3.25E-01 |
| PEBP1          | 0.10  | 6.14E-01 | -0.20 | 3.25E-01 |
| RP11-295I5.3   | 0.01  | 9.70E-01 | -0.20 | 3.25E-01 |

|                 |       |          |       |          |
|-----------------|-------|----------|-------|----------|
| RP11-342K6.2    | -0.35 | 6.82E-02 | -0.20 | 3.25E-01 |
| RP11-687M24.8   | -0.15 | 4.41E-01 | -0.20 | 3.25E-01 |
| RP5-991C6.4     | -0.09 | 6.49E-01 | -0.20 | 3.25E-01 |
| RTKN2           | 0.29  | 1.36E-01 | -0.20 | 3.25E-01 |
| SLC25A36        | -0.11 | 5.80E-01 | -0.20 | 3.25E-01 |
| TCEB3C          | 0.13  | 5.11E-01 | -0.20 | 3.25E-01 |
| TRIM9           | -0.48 | 9.84E-03 | -0.20 | 3.25E-01 |
| CHD1            | 0.37  | 5.48E-02 | -0.20 | 3.26E-01 |
| CLDN18          | -0.26 | 1.89E-01 | -0.20 | 3.26E-01 |
| CTA-444M12.3    | -0.31 | 1.10E-01 | -0.20 | 3.26E-01 |
| CTD-3065J16.9   | 0.09  | 6.57E-01 | 0.20  | 3.26E-01 |
| ECI2            | -0.09 | 6.61E-01 | -0.20 | 3.26E-01 |
| ENGASE          | -0.29 | 1.40E-01 | 0.20  | 3.26E-01 |
| FAM13A          | -0.34 | 7.32E-02 | -0.20 | 3.26E-01 |
| ISM1            | -0.35 | 7.15E-02 | -0.20 | 3.26E-01 |
| MICU1           | -0.10 | 6.21E-01 | -0.20 | 3.26E-01 |
| MYH15           | 0.07  | 7.20E-01 | -0.20 | 3.26E-01 |
| NOL8            | -0.04 | 8.43E-01 | -0.20 | 3.26E-01 |
| RABGGTB         | -0.12 | 5.37E-01 | -0.20 | 3.26E-01 |
| RAP2A           | 0.29  | 1.31E-01 | 0.20  | 3.26E-01 |
| RNU1-73P        | 0.05  | 8.08E-01 | -0.20 | 3.26E-01 |
| RNU5B-1         | 0.14  | 4.72E-01 | 0.20  | 3.26E-01 |
| RP11-324O2.3    | -0.13 | 4.96E-01 | -0.20 | 3.26E-01 |
| RP11-80P20.3    | -0.12 | 5.41E-01 | -0.20 | 3.26E-01 |
| RP13-270P17.2   | -0.15 | 4.49E-01 | 0.20  | 3.26E-01 |
| SNORA55         | 0.24  | 2.11E-01 | 0.20  | 3.26E-01 |
| SPTLC3          | -0.03 | 8.61E-01 | -0.20 | 3.26E-01 |
| TRIB2           | 0.19  | 3.33E-01 | 0.20  | 3.26E-01 |
| WDR20           | -0.17 | 3.80E-01 | 0.20  | 3.26E-01 |
| XLOC_005339     | -0.43 | 2.17E-02 | -0.20 | 3.26E-01 |
| Xbac-BPG154L12. | -0.30 | 1.15E-01 | -0.20 | 3.26E-01 |
| ZNF555          | 0.25  | 1.91E-01 | 0.20  | 3.26E-01 |
| AC113189.5      | -0.04 | 8.54E-01 | 0.20  | 3.27E-01 |
| AC124944.3      | 0.01  | 9.70E-01 | -0.20 | 3.27E-01 |
| ADAMTS1         | -0.05 | 7.92E-01 | -0.20 | 3.27E-01 |
| CEP350          | -0.11 | 5.84E-01 | -0.20 | 3.27E-01 |
| CTD-2231E14.8   | 0.02  | 9.02E-01 | -0.20 | 3.27E-01 |
| DUSP1           | -0.36 | 6.13E-02 | -0.20 | 3.27E-01 |
| FLJ41941        | -0.19 | 3.41E-01 | 0.20  | 3.27E-01 |
| FTL             | 0.04  | 8.59E-01 | 0.20  | 3.27E-01 |
| GREB1L          | -0.06 | 7.59E-01 | -0.20 | 3.27E-01 |
| HNRNPA1P35      | 0.06  | 7.59E-01 | -0.20 | 3.27E-01 |
| PPP1R8P1        | -0.34 | 7.46E-02 | -0.20 | 3.27E-01 |
| RB1CC1          | -0.20 | 2.97E-01 | -0.20 | 3.27E-01 |
| RN7SL566P       | -0.12 | 5.43E-01 | 0.20  | 3.27E-01 |
| RP11-118E18.2   | 0.00  | 9.94E-01 | 0.20  | 3.27E-01 |
| RP11-157J24.2   | 0.22  | 2.53E-01 | -0.20 | 3.27E-01 |

|                      |       |          |       |          |
|----------------------|-------|----------|-------|----------|
| <b>RP11-77H9.2</b>   | 0.12  | 5.29E-01 | -0.20 | 3.27E-01 |
| 5-Sep                | -0.01 | 9.78E-01 | 0.20  | 3.27E-01 |
| SLC12A3              | 0.16  | 4.15E-01 | -0.20 | 3.27E-01 |
| SNORD116             | -0.23 | 2.45E-01 | -0.20 | 3.27E-01 |
| SNRK                 | -0.12 | 5.46E-01 | -0.20 | 3.27E-01 |
| WNK4                 | 0.22  | 2.62E-01 | -0.20 | 3.27E-01 |
| <b>XLOC_005377</b>   | -0.10 | 6.00E-01 | 0.20  | 3.27E-01 |
| ZFP3                 | 0.19  | 3.45E-01 | -0.20 | 3.27E-01 |
| ZNF890P              | 0.33  | 8.56E-02 | 0.20  | 3.27E-01 |
| <b>AC004945.1</b>    | -0.12 | 5.46E-01 | -0.20 | 3.28E-01 |
| CCDC144A             | -0.18 | 3.52E-01 | -0.20 | 3.28E-01 |
| CFAP53               | 0.12  | 5.33E-01 | -0.20 | 3.28E-01 |
| CLDN4                | -0.18 | 3.57E-01 | -0.20 | 3.28E-01 |
| DLEU2L               | -0.07 | 7.38E-01 | -0.20 | 3.28E-01 |
| ENDOU                | 0.31  | 1.12E-01 | -0.20 | 3.28E-01 |
| FAM162B              | 0.05  | 7.87E-01 | 0.20  | 3.28E-01 |
| ITCH-AS1             | -0.22 | 2.59E-01 | 0.20  | 3.28E-01 |
| <b>KB-1125A3.12</b>  | -0.08 | 7.00E-01 | -0.20 | 3.28E-01 |
| MPRIPP1              | -0.24 | 2.19E-01 | -0.20 | 3.28E-01 |
| MPZL3                | 0.12  | 5.29E-01 | 0.20  | 3.28E-01 |
| PCDHB5               | 0.06  | 7.58E-01 | -0.20 | 3.28E-01 |
| PDE6D                | 0.05  | 7.96E-01 | 0.20  | 3.28E-01 |
| <b>RP11-12O16.1</b>  | -0.25 | 1.93E-01 | -0.20 | 3.28E-01 |
| <b>RP11-731D1.4</b>  | -0.02 | 9.38E-01 | -0.20 | 3.28E-01 |
| <b>RP11-79N23.1</b>  | -0.19 | 3.26E-01 | -0.20 | 3.28E-01 |
| <b>RP11-804H8.7</b>  | 0.25  | 2.03E-01 | -0.20 | 3.28E-01 |
| <b>RP11-894P9.2</b>  | 0.00  | 9.86E-01 | 0.20  | 3.28E-01 |
| SYN2                 | -0.42 | 2.53E-02 | -0.20 | 3.28E-01 |
| CC2D2A               | 0.15  | 4.55E-01 | -0.20 | 3.28E-01 |
| <b>CTB-60B18.10</b>  | 0.00  | 9.83E-01 | -0.20 | 3.28E-01 |
| <b>CTD-3185P2.1</b>  | 0.36  | 6.33E-02 | -0.20 | 3.28E-01 |
| G8687                | -0.05 | 8.04E-01 | -0.20 | 3.28E-01 |
| <b>RP11-162G10.1</b> | 0.11  | 5.60E-01 | -0.20 | 3.28E-01 |
| SYCP2                | 0.08  | 6.68E-01 | -0.20 | 3.28E-01 |
| TMEM164              | -0.07 | 7.35E-01 | -0.20 | 3.28E-01 |
| TTC25                | -0.20 | 3.02E-01 | -0.20 | 3.28E-01 |
| TTPA                 | -0.09 | 6.67E-01 | -0.20 | 3.28E-01 |
| UPRT                 | -0.07 | 7.26E-01 | -0.20 | 3.28E-01 |
| <b>WHAMMP2</b>       | 0.20  | 3.14E-01 | -0.20 | 3.28E-01 |
| <b>AC069363.1</b>    | 0.12  | 5.31E-01 | 0.20  | 3.28E-01 |
| CAPG                 | 0.13  | 5.10E-01 | 0.20  | 3.28E-01 |
| DACT2                | 0.11  | 5.80E-01 | 0.20  | 3.28E-01 |
| LENG1                | 0.00  | 9.86E-01 | 0.20  | 3.28E-01 |
| MIR589               | -0.23 | 2.34E-01 | 0.20  | 3.28E-01 |
| <b>RP13-977J11.2</b> | 0.06  | 7.63E-01 | 0.20  | 3.28E-01 |
| TRAF7                | 0.36  | 5.74E-02 | 0.20  | 3.28E-01 |
| UNK                  | 0.10  | 6.19E-01 | 0.20  | 3.28E-01 |

|               |       |          |       |          |
|---------------|-------|----------|-------|----------|
| ABCE1         | 0.22  | 2.51E-01 | -0.20 | 3.29E-01 |
| ADGRL3        | -0.15 | 4.54E-01 | -0.20 | 3.29E-01 |
| APLP2         | 0.36  | 5.96E-02 | 0.20  | 3.29E-01 |
| BAIAP2L1      | 0.25  | 2.03E-01 | -0.20 | 3.29E-01 |
| CERS3-AS1     | 0.12  | 5.50E-01 | -0.20 | 3.29E-01 |
| CHRM3-AS2     | 0.36  | 6.07E-02 | 0.20  | 3.29E-01 |
| ECM1          | -0.10 | 6.23E-01 | 0.20  | 3.29E-01 |
| EFNA3         | 0.07  | 7.10E-01 | -0.20 | 3.29E-01 |
| G8412         | 0.12  | 5.30E-01 | 0.20  | 3.29E-01 |
| HLA-J         | -0.03 | 8.65E-01 | 0.20  | 3.29E-01 |
| MAPK8         | 0.27  | 1.60E-01 | -0.20 | 3.29E-01 |
| MIR320A       | 0.06  | 7.58E-01 | -0.20 | 3.29E-01 |
| NUB1          | 0.07  | 7.40E-01 | 0.20  | 3.29E-01 |
| R3HDM1        | 0.06  | 7.62E-01 | 0.20  | 3.29E-01 |
| RP11-101O6.2  | 0.13  | 5.16E-01 | -0.20 | 3.29E-01 |
| RP11-135F9.3  | 0.20  | 3.07E-01 | -0.20 | 3.29E-01 |
| RP3-522J7.6   | 0.04  | 8.57E-01 | -0.20 | 3.29E-01 |
| SHPRH         | -0.15 | 4.31E-01 | -0.20 | 3.29E-01 |
| STXBP1        | -0.07 | 7.10E-01 | 0.20  | 3.29E-01 |
| SUPT7L        | -0.12 | 5.27E-01 | 0.20  | 3.29E-01 |
| TAS2R42       | -0.13 | 5.19E-01 | -0.20 | 3.29E-01 |
| TBX5-AS1      | -0.02 | 9.22E-01 | -0.20 | 3.29E-01 |
| XLOC_005087   | -0.23 | 2.43E-01 | -0.20 | 3.29E-01 |
| AC017078.1    | 0.11  | 5.91E-01 | 0.19  | 3.30E-01 |
| AC096775.2    | 0.06  | 7.59E-01 | -0.19 | 3.30E-01 |
| AFF2          | 0.19  | 3.27E-01 | -0.19 | 3.30E-01 |
| ATP1B1P1      | 0.25  | 2.02E-01 | -0.19 | 3.30E-01 |
| C12orf60      | 0.17  | 3.93E-01 | -0.19 | 3.30E-01 |
| CTD-2047H16.4 | -0.24 | 2.09E-01 | 0.19  | 3.30E-01 |
| DLG5-AS1      | -0.14 | 4.69E-01 | 0.19  | 3.30E-01 |
| EIF4B         | 0.06  | 7.67E-01 | -0.19 | 3.30E-01 |
| FOXD4L1       | 0.11  | 5.71E-01 | -0.19 | 3.30E-01 |
| G28632        | 0.07  | 7.20E-01 | -0.19 | 3.30E-01 |
| GABRP         | -0.32 | 9.84E-02 | -0.19 | 3.30E-01 |
| IREB2         | 0.08  | 6.79E-01 | -0.19 | 3.30E-01 |
| MIR2116       | -0.16 | 4.26E-01 | -0.19 | 3.30E-01 |
| RP11-196G11.4 | 0.03  | 8.82E-01 | -0.19 | 3.30E-01 |
| RP3-424M6.4   | -0.28 | 1.53E-01 | 0.19  | 3.30E-01 |
| RP4-621F18.2  | 0.04  | 8.55E-01 | -0.19 | 3.30E-01 |
| RP5-837J1.1   | 0.05  | 8.07E-01 | -0.19 | 3.30E-01 |
| TMEM266       | -0.01 | 9.57E-01 | 0.19  | 3.30E-01 |
| TSC22D1-AS1   | 0.09  | 6.65E-01 | -0.19 | 3.30E-01 |
| ZNF763        | 0.00  | 9.98E-01 | -0.19 | 3.30E-01 |
| BBS5          | -0.13 | 4.94E-01 | -0.19 | 3.31E-01 |
| C1orf100      | -0.05 | 7.94E-01 | -0.19 | 3.31E-01 |
| CTD-3157E16.2 | -0.21 | 2.95E-01 | -0.19 | 3.31E-01 |
| EMB           | -0.26 | 1.79E-01 | -0.19 | 3.31E-01 |



|               |       |          |       |          |
|---------------|-------|----------|-------|----------|
| FAM229B       | 0.09  | 6.41E-01 | -0.19 | 3.31E-01 |
| FBXO48        | 0.23  | 2.45E-01 | -0.19 | 3.31E-01 |
| G18341        | -0.16 | 4.21E-01 | -0.19 | 3.31E-01 |
| KLHDC8A       | -0.28 | 1.45E-01 | -0.19 | 3.31E-01 |
| RNU6-360P     | -0.37 | 5.38E-02 | -0.19 | 3.31E-01 |
| RP11-231C14.4 | -0.03 | 8.73E-01 | -0.19 | 3.31E-01 |
| RP11-346J10.1 | 0.02  | 9.24E-01 | -0.19 | 3.31E-01 |
| RP4-630A11.3  | 0.05  | 8.10E-01 | -0.19 | 3.31E-01 |
| SLC1A2        | 0.16  | 4.29E-01 | -0.19 | 3.31E-01 |
| XLOC_001097   | 0.12  | 5.30E-01 | -0.19 | 3.31E-01 |
| ATP5G2P3      | -0.19 | 3.37E-01 | 0.19  | 3.31E-01 |
| ELF4          | 0.05  | 8.04E-01 | 0.19  | 3.31E-01 |
| IPO8          | 0.09  | 6.50E-01 | 0.19  | 3.31E-01 |
| NFU1          | 0.11  | 5.90E-01 | 0.19  | 3.31E-01 |
| OSBPL10       | 0.02  | 9.03E-01 | 0.19  | 3.31E-01 |
| RP11-346C16.1 | 0.18  | 3.55E-01 | 0.19  | 3.31E-01 |
| STK25         | 0.01  | 9.60E-01 | 0.19  | 3.31E-01 |
| VN1R80P       | 0.07  | 7.32E-01 | 0.19  | 3.31E-01 |
| ZDHHC20P4     | 0.15  | 4.40E-01 | 0.19  | 3.31E-01 |
| AP2S1         | 0.30  | 1.15E-01 | 0.19  | 3.32E-01 |
| CTD-2553L13.5 | 0.14  | 4.84E-01 | 0.19  | 3.32E-01 |
| DAW1          | -0.21 | 2.73E-01 | 0.19  | 3.32E-01 |
| DDX5          | 0.06  | 7.62E-01 | -0.19 | 3.32E-01 |
| GALNT6        | 0.31  | 1.08E-01 | 0.19  | 3.32E-01 |
| HEXIM2        | -0.09 | 6.52E-01 | -0.19 | 3.32E-01 |
| HMG2P28       | -0.46 | 1.44E-02 | -0.19 | 3.32E-01 |
| LCE1E         | 0.22  | 2.52E-01 | 0.19  | 3.32E-01 |
| NPTX1         | -0.30 | 1.17E-01 | 0.19  | 3.32E-01 |
| OGFRL1        | 0.35  | 7.08E-02 | -0.19 | 3.32E-01 |
| PCDHGC3       | 0.13  | 5.19E-01 | 0.19  | 3.32E-01 |
| PCYOX1L       | 0.10  | 6.30E-01 | 0.19  | 3.32E-01 |
| POPDC2        | -0.14 | 4.69E-01 | -0.19 | 3.32E-01 |
| RBFOX2        | -0.03 | 8.79E-01 | -0.19 | 3.32E-01 |
| RP11-298C2.1  | -0.19 | 3.26E-01 | 0.19  | 3.32E-01 |
| RP11-491H19.1 | -0.40 | 3.65E-02 | -0.19 | 3.32E-01 |
| RPS25         | 0.16  | 4.30E-01 | -0.19 | 3.32E-01 |
| SDR9C7        | 0.29  | 1.30E-01 | 0.19  | 3.32E-01 |
| SMG6-IT1      | 0.10  | 6.26E-01 | -0.19 | 3.32E-01 |
| STX10         | 0.16  | 4.24E-01 | 0.19  | 3.32E-01 |
| TRBV29-1      | 0.03  | 8.62E-01 | 0.19  | 3.32E-01 |
| AC069282.6    | 0.05  | 7.93E-01 | -0.19 | 3.32E-01 |
| AC097724.3    | -0.27 | 1.69E-01 | -0.19 | 3.32E-01 |
| AP002381.2    | -0.36 | 5.66E-02 | 0.19  | 3.32E-01 |
| BOLL          | -0.03 | 8.68E-01 | -0.19 | 3.32E-01 |
| CTB-191K22.6  | 0.14  | 4.66E-01 | -0.19 | 3.32E-01 |
| CTD-2020K17.1 | 0.08  | 6.70E-01 | 0.19  | 3.32E-01 |
| CTD-2530N21.4 | -0.25 | 2.07E-01 | -0.19 | 3.32E-01 |

|                      |       |          |       |          |
|----------------------|-------|----------|-------|----------|
| <b>CTD-3018O17.5</b> | -0.06 | 7.57E-01 | -0.19 | 3.32E-01 |
| <b>EEF1A1P4</b>      | 0.15  | 4.59E-01 | -0.19 | 3.32E-01 |
| <b>FAM160A2</b>      | -0.22 | 2.53E-01 | -0.19 | 3.32E-01 |
| <b>HIP1R</b>         | 0.13  | 5.01E-01 | 0.19  | 3.32E-01 |
| <b>IFITM9P</b>       | -0.27 | 1.57E-01 | -0.19 | 3.32E-01 |
| <b>IGF2R</b>         | -0.07 | 7.14E-01 | 0.19  | 3.32E-01 |
| <b>LINC01235</b>     | -0.21 | 2.87E-01 | 0.19  | 3.32E-01 |
| <b>MMRN1</b>         | 0.07  | 7.14E-01 | 0.19  | 3.32E-01 |
| <b>NT5CP1</b>        | -0.17 | 3.87E-01 | -0.19 | 3.32E-01 |
| <b>OTUD5</b>         | 0.03  | 8.93E-01 | 0.19  | 3.32E-01 |
| <b>OTX1</b>          | 0.07  | 7.36E-01 | -0.19 | 3.32E-01 |
| <b>PEX7</b>          | -0.03 | 8.92E-01 | -0.19 | 3.32E-01 |
| <b>RASSF3</b>        | 0.10  | 5.96E-01 | 0.19  | 3.32E-01 |
| <b>RNA5SP385</b>     | 0.22  | 2.65E-01 | -0.19 | 3.32E-01 |
| <b>RNU6-344P</b>     | 0.02  | 9.04E-01 | 0.19  | 3.32E-01 |
| <b>RP11-169K17.2</b> | 0.15  | 4.34E-01 | 0.19  | 3.32E-01 |
| <b>RP11-384M15.3</b> | 0.19  | 3.36E-01 | -0.19 | 3.32E-01 |
| <b>RP11-59H7.1</b>   | 0.29  | 1.31E-01 | -0.19 | 3.32E-01 |
| <b>RP11-728K20.2</b> | -0.10 | 5.97E-01 | -0.19 | 3.32E-01 |
| <b>RPL23AP86</b>     | 0.18  | 3.55E-01 | 0.19  | 3.32E-01 |
| <b>RSPRY1</b>        | 0.22  | 2.56E-01 | 0.19  | 3.32E-01 |
| <b>SLC7A13</b>       | 0.06  | 7.75E-01 | 0.19  | 3.32E-01 |
| <b>SNX19</b>         | 0.05  | 7.99E-01 | 0.19  | 3.32E-01 |
| <b>TMEM106B</b>      | 0.00  | 9.94E-01 | -0.19 | 3.32E-01 |
| <b>UTP23</b>         | 0.17  | 3.74E-01 | -0.19 | 3.32E-01 |
| <b>XLOC_008667</b>   | -0.03 | 8.74E-01 | 0.19  | 3.32E-01 |
| <b>ZDHHC12</b>       | 0.02  | 9.02E-01 | 0.19  | 3.32E-01 |
| <b>AC073046.25</b>   | 0.10  | 6.27E-01 | -0.19 | 3.33E-01 |
| <b>AC108218.1</b>    | -0.43 | 2.13E-02 | 0.19  | 3.33E-01 |
| <b>C3orf80</b>       | -0.09 | 6.34E-01 | 0.19  | 3.33E-01 |
| <b>COX20</b>         | 0.05  | 7.97E-01 | -0.19 | 3.33E-01 |
| <b>DAGLB</b>         | -0.12 | 5.41E-01 | 0.19  | 3.33E-01 |
| <b>DIXDC1</b>        | -0.40 | 3.29E-02 | -0.19 | 3.33E-01 |
| <b>DOCK10</b>        | 0.10  | 5.95E-01 | 0.19  | 3.33E-01 |
| <b>FAM132B</b>       | 0.00  | 9.98E-01 | -0.19 | 3.33E-01 |
| <b>FAM189A1</b>      | 0.20  | 2.96E-01 | -0.19 | 3.33E-01 |
| <b>G36466</b>        | 0.25  | 1.97E-01 | -0.19 | 3.33E-01 |
| <b>GPR137C</b>       | -0.01 | 9.66E-01 | -0.19 | 3.33E-01 |
| <b>GRIN2A</b>        | 0.10  | 6.10E-01 | -0.19 | 3.33E-01 |
| <b>HCG18</b>         | 0.01  | 9.60E-01 | -0.19 | 3.33E-01 |
| <b>LACE1</b>         | -0.14 | 4.66E-01 | 0.19  | 3.33E-01 |
| <b>MED15</b>         | 0.05  | 7.96E-01 | 0.19  | 3.33E-01 |
| <b>NPR3</b>          | -0.07 | 7.18E-01 | -0.19 | 3.33E-01 |
| <b>NYNRIN</b>        | -0.04 | 8.38E-01 | -0.19 | 3.33E-01 |
| <b>PKMP3</b>         | -0.15 | 4.42E-01 | -0.19 | 3.33E-01 |
| <b>PRSS30P</b>       | 0.01  | 9.66E-01 | -0.19 | 3.33E-01 |
| <b>SCAMP4</b>        | 0.26  | 1.75E-01 | 0.19  | 3.33E-01 |

|                |       |          |       |          |
|----------------|-------|----------|-------|----------|
| SLC22A13       | 0.39  | 3.91E-02 | 0.19  | 3.33E-01 |
| TNFRSF13C      | -0.03 | 8.78E-01 | 0.19  | 3.33E-01 |
| UTY            | 0.35  | 6.61E-02 | 0.19  | 3.33E-01 |
| ZNF431         | -0.23 | 2.45E-01 | -0.19 | 3.33E-01 |
| CSF1R          | 0.19  | 3.29E-01 | 0.19  | 3.34E-01 |
| DDR1           | 0.18  | 3.57E-01 | 0.19  | 3.34E-01 |
| G27754         | -0.02 | 9.25E-01 | 0.19  | 3.34E-01 |
| IER2           | 0.30  | 1.19E-01 | 0.19  | 3.34E-01 |
| KDM2A          | 0.09  | 6.48E-01 | 0.19  | 3.34E-01 |
| NRL            | 0.14  | 4.79E-01 | 0.19  | 3.34E-01 |
| P3H1           | -0.08 | 6.76E-01 | 0.19  | 3.34E-01 |
| PMF1           | 0.07  | 7.37E-01 | 0.19  | 3.34E-01 |
| RP11-356I18.1  | 0.15  | 4.45E-01 | 0.19  | 3.34E-01 |
| SORD2P         | -0.02 | 9.21E-01 | 0.19  | 3.34E-01 |
| TREM2          | 0.19  | 3.22E-01 | 0.19  | 3.34E-01 |
| ZFPL1          | -0.13 | 5.10E-01 | 0.19  | 3.34E-01 |
| AP000255.6     | -0.02 | 9.08E-01 | -0.19 | 3.34E-01 |
| DPYSL2         | -0.15 | 4.38E-01 | -0.19 | 3.34E-01 |
| GRTP1-AS1      | 0.17  | 3.90E-01 | -0.19 | 3.34E-01 |
| KCNQ4          | -0.11 | 5.76E-01 | -0.19 | 3.34E-01 |
| MIR576         | 0.04  | 8.33E-01 | -0.19 | 3.34E-01 |
| RP1-149A16.17  | -0.01 | 9.64E-01 | -0.19 | 3.34E-01 |
| RP11-546D6.3   | -0.14 | 4.88E-01 | -0.19 | 3.34E-01 |
| RP11-703M24.5  | 0.00  | 9.89E-01 | -0.19 | 3.34E-01 |
| RP11-713N11.6  | -0.32 | 9.93E-02 | -0.19 | 3.34E-01 |
| TDRD3          | -0.13 | 5.12E-01 | -0.19 | 3.34E-01 |
| ZMPSTE24       | 0.13  | 4.95E-01 | -0.19 | 3.34E-01 |
| AP5B1          | 0.28  | 1.52E-01 | 0.19  | 3.35E-01 |
| BZRAP1         | -0.02 | 9.17E-01 | -0.19 | 3.35E-01 |
| CDC37L1        | 0.13  | 4.94E-01 | -0.19 | 3.35E-01 |
| CPB1           | -0.07 | 7.38E-01 | 0.19  | 3.35E-01 |
| CTD-2396E7.11  | -0.21 | 2.76E-01 | -0.19 | 3.35E-01 |
| G26124         | -0.12 | 5.53E-01 | 0.19  | 3.35E-01 |
| GPX1           | 0.14  | 4.75E-01 | 0.19  | 3.35E-01 |
| KLHL4          | -0.04 | 8.48E-01 | -0.19 | 3.35E-01 |
| KRT18P61       | 0.04  | 8.52E-01 | 0.19  | 3.35E-01 |
| LINC01158      | -0.07 | 7.15E-01 | 0.19  | 3.35E-01 |
| NEK11          | -0.35 | 6.64E-02 | 0.19  | 3.35E-01 |
| PLCH1          | -0.20 | 2.98E-01 | -0.19 | 3.35E-01 |
| RP1-309F20.3   | -0.19 | 3.31E-01 | -0.19 | 3.35E-01 |
| RP11-102M11.2  | 0.25  | 2.04E-01 | -0.19 | 3.35E-01 |
| RP11-1124B17.1 | -0.27 | 1.66E-01 | -0.19 | 3.35E-01 |
| RP11-173A16.1  | -0.23 | 2.35E-01 | -0.19 | 3.35E-01 |
| RP11-180P8.4   | 0.20  | 3.12E-01 | -0.19 | 3.35E-01 |
| RP11-211G3.2   | -0.03 | 8.76E-01 | 0.19  | 3.35E-01 |
| RP11-336A10.4  | -0.25 | 1.97E-01 | 0.19  | 3.35E-01 |
| RP11-474B12.1  | -0.03 | 8.92E-01 | 0.19  | 3.35E-01 |

|               |       |          |       |          |
|---------------|-------|----------|-------|----------|
| SCAND1        | 0.24  | 2.24E-01 | 0.19  | 3.35E-01 |
| SDC1          | 0.02  | 9.00E-01 | -0.19 | 3.35E-01 |
| SIRT6         | 0.26  | 1.76E-01 | 0.19  | 3.35E-01 |
| SNX29P1       | -0.42 | 2.68E-02 | -0.19 | 3.35E-01 |
| XLOC_002545   | 0.35  | 7.15E-02 | -0.19 | 3.35E-01 |
| ZFP69         | 0.23  | 2.38E-01 | 0.19  | 3.35E-01 |
| AC005775.2    | -0.18 | 3.69E-01 | -0.19 | 3.35E-01 |
| AC008171.1    | 0.09  | 6.47E-01 | 0.19  | 3.35E-01 |
| CD248         | -0.28 | 1.46E-01 | 0.19  | 3.35E-01 |
| ELF2          | -0.27 | 1.72E-01 | -0.19 | 3.35E-01 |
| EMC9          | -0.01 | 9.70E-01 | 0.19  | 3.35E-01 |
| EPHA10        | 0.00  | 9.98E-01 | 0.19  | 3.35E-01 |
| HP            | 0.00  | 9.99E-01 | -0.19 | 3.35E-01 |
| HPD           | 0.35  | 6.48E-02 | 0.19  | 3.35E-01 |
| HSD17B11      | -0.05 | 8.19E-01 | 0.19  | 3.35E-01 |
| IGFL3         | -0.02 | 9.35E-01 | -0.19 | 3.35E-01 |
| KATNBL1P3     | -0.05 | 7.84E-01 | -0.19 | 3.35E-01 |
| KCTD11        | -0.13 | 5.15E-01 | 0.19  | 3.35E-01 |
| LIMA1         | 0.31  | 1.05E-01 | 0.19  | 3.35E-01 |
| NCAPGP1       | -0.17 | 3.82E-01 | -0.19 | 3.35E-01 |
| PELO          | -0.01 | 9.77E-01 | -0.19 | 3.35E-01 |
| PIK3R6        | 0.07  | 7.18E-01 | -0.19 | 3.35E-01 |
| RNF138        | 0.18  | 3.62E-01 | -0.19 | 3.35E-01 |
| RNU1-100P     | -0.20 | 3.07E-01 | -0.19 | 3.35E-01 |
| RP11-182J1.12 | -0.06 | 7.64E-01 | 0.19  | 3.35E-01 |
| RP11-316K19.3 | -0.11 | 5.73E-01 | -0.19 | 3.35E-01 |
| RP11-58H15.3  | -0.40 | 3.45E-02 | -0.19 | 3.35E-01 |
| RP11-775B15.2 | -0.31 | 1.14E-01 | -0.19 | 3.35E-01 |
| RP11-90B9.2   | 0.11  | 5.93E-01 | -0.19 | 3.35E-01 |
| XLOC_005479   | -0.31 | 1.11E-01 | -0.19 | 3.35E-01 |
| XLOC_010945   | 0.08  | 6.73E-01 | 0.19  | 3.35E-01 |
| AC005152.3    | 0.06  | 7.49E-01 | -0.19 | 3.36E-01 |
| CHKB-AS1      | -0.05 | 8.07E-01 | 0.19  | 3.36E-01 |
| GPC2          | -0.23 | 2.48E-01 | -0.19 | 3.36E-01 |
| HTATSF1       | 0.06  | 7.59E-01 | -0.19 | 3.36E-01 |
| LYPD6B        | -0.44 | 1.82E-02 | -0.19 | 3.36E-01 |
| MLXIPL        | -0.26 | 1.88E-01 | -0.19 | 3.36E-01 |
| NBPF11        | -0.12 | 5.37E-01 | -0.19 | 3.36E-01 |
| NCF2          | 0.19  | 3.35E-01 | 0.19  | 3.36E-01 |
| NDUFA8        | 0.02  | 9.04E-01 | 0.19  | 3.36E-01 |
| PACSIN2       | -0.17 | 3.74E-01 | -0.19 | 3.36E-01 |
| RNU6-198P     | 0.10  | 6.11E-01 | -0.19 | 3.36E-01 |
| RP11-497H16.4 | -0.06 | 7.81E-01 | -0.19 | 3.36E-01 |
| SH2B3         | 0.10  | 6.11E-01 | 0.19  | 3.36E-01 |
| SLC15A4       | 0.32  | 9.78E-02 | 0.19  | 3.36E-01 |
| TRIM31-AS1    | -0.18 | 3.62E-01 | -0.19 | 3.36E-01 |
| TRO           | -0.21 | 2.92E-01 | -0.19 | 3.36E-01 |

|                      |       |          |       |          |
|----------------------|-------|----------|-------|----------|
| <b>TROVE2</b>        | 0.08  | 6.94E-01 | -0.19 | 3.36E-01 |
| <b>AC091729.8</b>    | -0.05 | 8.13E-01 | -0.19 | 3.37E-01 |
| <b>AC093642.3</b>    | 0.23  | 2.45E-01 | -0.19 | 3.37E-01 |
| <b>CENPK</b>         | 0.02  | 9.12E-01 | -0.19 | 3.37E-01 |
| <b>DUSP12</b>        | -0.01 | 9.57E-01 | -0.19 | 3.37E-01 |
| <b>GLUD1</b>         | -0.13 | 5.04E-01 | -0.19 | 3.37E-01 |
| <b>MIR4292</b>       | -0.02 | 9.22E-01 | -0.19 | 3.37E-01 |
| <b>OSBPL1A</b>       | -0.18 | 3.64E-01 | -0.19 | 3.37E-01 |
| <b>RAB32</b>         | -0.02 | 9.37E-01 | -0.19 | 3.37E-01 |
| <b>RBMXP4</b>        | -0.11 | 5.64E-01 | -0.19 | 3.37E-01 |
| <b>CCR1</b>          | 0.10  | 6.03E-01 | 0.19  | 3.37E-01 |
| <b>MIR3619</b>       | -0.03 | 8.94E-01 | 0.19  | 3.37E-01 |
| <b>OCIAD1-AS1</b>    | -0.31 | 1.04E-01 | 0.19  | 3.37E-01 |
| <b>RP11-328J14.1</b> | 0.37  | 5.27E-02 | 0.19  | 3.37E-01 |
| <b>SUCNR1</b>        | 0.19  | 3.43E-01 | 0.19  | 3.37E-01 |
| <b>SUV420H1</b>      | 0.09  | 6.45E-01 | 0.19  | 3.37E-01 |
| <b>ALPL</b>          | 0.08  | 7.02E-01 | 0.19  | 3.38E-01 |
| <b>C9orf153</b>      | -0.09 | 6.54E-01 | -0.19 | 3.38E-01 |
| <b>CFAP69</b>        | -0.40 | 3.67E-02 | -0.19 | 3.38E-01 |
| <b>DEFB4A</b>        | 0.17  | 3.83E-01 | 0.19  | 3.38E-01 |
| <b>GDNF-AS1</b>      | -0.14 | 4.81E-01 | -0.19 | 3.38E-01 |
| <b>KRT14</b>         | -0.06 | 7.45E-01 | 0.19  | 3.38E-01 |
| <b>LPGAT1</b>        | 0.02  | 9.24E-01 | -0.19 | 3.38E-01 |
| <b>PIGT</b>          | -0.13 | 5.07E-01 | 0.19  | 3.38E-01 |
| <b>PIP5K1P1</b>      | -0.09 | 6.50E-01 | -0.19 | 3.38E-01 |
| <b>RNU6-748P</b>     | -0.37 | 5.35E-02 | 0.19  | 3.38E-01 |
| <b>RP11-394I13.2</b> | -0.04 | 8.57E-01 | -0.19 | 3.38E-01 |
| <b>RP11-394O2.3</b>  | 0.08  | 6.86E-01 | 0.19  | 3.38E-01 |
| <b>RP11-677I18.3</b> | 0.25  | 1.93E-01 | -0.19 | 3.38E-01 |
| <b>RP11-723O4.2</b>  | 0.12  | 5.33E-01 | 0.19  | 3.38E-01 |
| <b>RP11-795F19.5</b> | 0.42  | 2.73E-02 | -0.19 | 3.38E-01 |
| <b>TCEAL3-AS1</b>    | -0.08 | 6.72E-01 | -0.19 | 3.38E-01 |
| <b>ZNF75A</b>        | 0.10  | 6.31E-01 | -0.19 | 3.38E-01 |
| <b>ADAM12</b>        | 0.13  | 5.04E-01 | 0.19  | 3.39E-01 |
| <b>ADAMTS15</b>      | -0.10 | 5.96E-01 | 0.19  | 3.39E-01 |
| <b>AF064858.10</b>   | -0.12 | 5.55E-01 | -0.19 | 3.39E-01 |
| <b>COLEC11</b>       | -0.09 | 6.48E-01 | 0.19  | 3.39E-01 |
| <b>DCAF7</b>         | 0.08  | 6.78E-01 | 0.19  | 3.39E-01 |
| <b>DKFZP434L187</b>  | -0.27 | 1.59E-01 | 0.19  | 3.39E-01 |
| <b>DOCK6</b>         | 0.03  | 8.65E-01 | 0.19  | 3.39E-01 |
| <b>ENO3</b>          | -0.20 | 3.20E-01 | -0.19 | 3.39E-01 |
| <b>FAM3C2</b>        | -0.12 | 5.33E-01 | -0.19 | 3.39E-01 |
| <b>GAP43</b>         | -0.48 | 9.75E-03 | -0.19 | 3.39E-01 |
| <b>HIATL2</b>        | -0.22 | 2.51E-01 | -0.19 | 3.39E-01 |
| <b>HSD3BP5</b>       | 0.04  | 8.48E-01 | 0.19  | 3.39E-01 |
| <b>LRRC25</b>        | 0.01  | 9.65E-01 | 0.19  | 3.39E-01 |
| <b>NAA10</b>         | 0.21  | 2.81E-01 | 0.19  | 3.39E-01 |

|               |       |          |       |          |
|---------------|-------|----------|-------|----------|
| NAIF1         | 0.07  | 7.16E-01 | 0.19  | 3.39E-01 |
| PRSS50        | 0.27  | 1.70E-01 | -0.19 | 3.39E-01 |
| RP1-224A6.9   | 0.09  | 6.65E-01 | -0.19 | 3.39E-01 |
| RP11-138I17.1 | -0.02 | 9.00E-01 | -0.19 | 3.39E-01 |
| RP11-158M2.4  | 0.33  | 8.87E-02 | 0.19  | 3.39E-01 |
| RP11-234B24.2 | -0.02 | 9.12E-01 | 0.19  | 3.39E-01 |
| RP11-404P21.5 | 0.02  | 9.06E-01 | -0.19 | 3.39E-01 |
| RP11-467J12.4 | -0.36 | 6.35E-02 | -0.19 | 3.39E-01 |
| RRAGB         | -0.19 | 3.41E-01 | -0.19 | 3.39E-01 |
| SLC41A2       | 0.35  | 6.98E-02 | -0.19 | 3.39E-01 |
| SNRPGP4       | 0.06  | 7.72E-01 | -0.19 | 3.39E-01 |
| SPRR2G        | 0.11  | 5.62E-01 | 0.19  | 3.39E-01 |
| VNN1          | 0.39  | 4.03E-02 | 0.19  | 3.39E-01 |
| Z83851.4      | 0.31  | 1.05E-01 | 0.19  | 3.39E-01 |
| ZNF678        | 0.04  | 8.45E-01 | -0.19 | 3.39E-01 |
| AC018892.9    | 0.19  | 3.30E-01 | -0.19 | 3.39E-01 |
| AC090625.1    | 0.01  | 9.59E-01 | -0.19 | 3.39E-01 |
| AC117395.1    | 0.02  | 9.11E-01 | 0.19  | 3.39E-01 |
| ADCK3         | -0.09 | 6.32E-01 | -0.19 | 3.39E-01 |
| AL365202.1    | 0.02  | 9.32E-01 | -0.19 | 3.39E-01 |
| COX18         | 0.31  | 1.07E-01 | 0.19  | 3.39E-01 |
| HLA-DRB5      | 0.00  | 9.99E-01 | 0.19  | 3.39E-01 |
| ILF3          | 0.08  | 6.80E-01 | 0.19  | 3.39E-01 |
| LHFPL3-AS2    | -0.30 | 1.16E-01 | -0.19 | 3.39E-01 |
| LINC00896     | 0.02  | 9.29E-01 | -0.19 | 3.39E-01 |
| MIR652        | -0.08 | 6.70E-01 | -0.19 | 3.39E-01 |
| RAB19         | -0.05 | 7.95E-01 | -0.19 | 3.39E-01 |
| RP11-274B21.9 | 0.26  | 1.74E-01 | -0.19 | 3.39E-01 |
| RP11-407N17.5 | 0.49  | 7.91E-03 | 0.19  | 3.39E-01 |
| RP11-672L10.6 | -0.22 | 2.64E-01 | -0.19 | 3.39E-01 |
| RPL17P11      | -0.05 | 8.18E-01 | -0.19 | 3.39E-01 |
| SCARNA6       | -0.30 | 1.15E-01 | 0.19  | 3.39E-01 |
| SHTN1         | -0.13 | 5.05E-01 | -0.19 | 3.39E-01 |
| SKIL          | 0.26  | 1.83E-01 | 0.19  | 3.39E-01 |
| SLC45A1       | -0.12 | 5.54E-01 | 0.19  | 3.39E-01 |
| TMC5          | 0.37  | 5.14E-02 | 0.19  | 3.39E-01 |
| TRGC2         | 0.20  | 2.96E-01 | -0.19 | 3.39E-01 |
| TUBBP1        | -0.15 | 4.44E-01 | -0.19 | 3.39E-01 |
| ZMYND12       | -0.16 | 4.08E-01 | 0.19  | 3.39E-01 |
| G2196         | -0.15 | 4.31E-01 | 0.19  | 3.40E-01 |
| G35951        | -0.34 | 8.08E-02 | 0.19  | 3.40E-01 |
| RP11-124N2.1  | 0.24  | 2.18E-01 | 0.19  | 3.40E-01 |
| RP11-359K18.4 | -0.04 | 8.21E-01 | 0.19  | 3.40E-01 |
| RP11-830F9.7  | 0.35  | 6.57E-02 | 0.19  | 3.40E-01 |
| TNPO1P2       | 0.13  | 5.10E-01 | 0.19  | 3.40E-01 |
| AC093788.1    | 0.20  | 2.97E-01 | -0.19 | 3.40E-01 |
| AC108676.1    | 0.04  | 8.56E-01 | -0.19 | 3.40E-01 |

|               |       |          |       |          |
|---------------|-------|----------|-------|----------|
| AVL9          | 0.38  | 4.64E-02 | -0.19 | 3.40E-01 |
| C20orf202     | 0.10  | 6.27E-01 | -0.19 | 3.40E-01 |
| DTWD2         | 0.27  | 1.57E-01 | -0.19 | 3.40E-01 |
| ERV3-1        | 0.35  | 6.66E-02 | -0.19 | 3.40E-01 |
| G2899         | -0.13 | 5.08E-01 | -0.19 | 3.40E-01 |
| ILF2P1        | 0.17  | 4.00E-01 | -0.19 | 3.40E-01 |
| LTK           | 0.06  | 7.57E-01 | -0.19 | 3.40E-01 |
| MIS18BP1      | 0.09  | 6.67E-01 | -0.19 | 3.40E-01 |
| PNMT          | -0.02 | 9.33E-01 | -0.19 | 3.40E-01 |
| RP11-272L14.2 | -0.39 | 3.92E-02 | -0.19 | 3.40E-01 |
| RP11-428F8.2  | 0.10  | 6.00E-01 | -0.19 | 3.40E-01 |
| SS18L1        | 0.05  | 7.89E-01 | -0.19 | 3.40E-01 |
| UGT1A6        | -0.16 | 4.09E-01 | -0.19 | 3.40E-01 |
| USP46         | 0.26  | 1.90E-01 | -0.19 | 3.40E-01 |
| AC013410.1    | 0.03  | 8.81E-01 | -0.19 | 3.41E-01 |
| AL121893.1    | -0.29 | 1.41E-01 | 0.19  | 3.41E-01 |
| AP3D1         | 0.26  | 1.90E-01 | 0.19  | 3.41E-01 |
| CORO6         | -0.17 | 3.73E-01 | 0.19  | 3.41E-01 |
| ELF3          | 0.08  | 6.85E-01 | 0.19  | 3.41E-01 |
| G26828        | -0.16 | 4.30E-01 | 0.19  | 3.41E-01 |
| HIST1H4PS1    | 0.25  | 2.08E-01 | -0.19 | 3.41E-01 |
| MAP3K19       | -0.29 | 1.33E-01 | -0.19 | 3.41E-01 |
| MDN1          | -0.20 | 3.18E-01 | -0.19 | 3.41E-01 |
| MIR647        | 0.11  | 5.81E-01 | 0.19  | 3.41E-01 |
| NDUFS2        | 0.22  | 2.68E-01 | 0.19  | 3.41E-01 |
| NUDT22        | 0.08  | 6.99E-01 | 0.19  | 3.41E-01 |
| RBM5          | -0.25 | 1.92E-01 | 0.19  | 3.41E-01 |
| RBM7          | 0.19  | 3.34E-01 | 0.19  | 3.41E-01 |
| RP1-122P22.2  | -0.11 | 5.75E-01 | 0.19  | 3.41E-01 |
| RP11-428O18.6 | 0.08  | 6.80E-01 | -0.19 | 3.41E-01 |
| RP11-504P24.3 | -0.05 | 8.07E-01 | -0.19 | 3.41E-01 |
| RP11-61L23.2  | 0.22  | 2.50E-01 | 0.19  | 3.41E-01 |
| RP11-66N24.7  | -0.33 | 8.45E-02 | -0.19 | 3.41E-01 |
| RPIA          | -0.17 | 3.87E-01 | 0.19  | 3.41E-01 |
| RPS15AP1      | -0.39 | 3.82E-02 | -0.19 | 3.41E-01 |
| SCO1          | 0.27  | 1.65E-01 | -0.19 | 3.41E-01 |
| SDCCAG3       | 0.17  | 3.97E-01 | 0.19  | 3.41E-01 |
| TNF           | 0.23  | 2.48E-01 | 0.19  | 3.41E-01 |
| AC009229.5    | -0.11 | 5.76E-01 | -0.19 | 3.42E-01 |
| APBA2         | -0.27 | 1.68E-01 | -0.19 | 3.42E-01 |
| ATG16L1       | -0.28 | 1.47E-01 | -0.19 | 3.42E-01 |
| B4GALT1       | 0.30  | 1.15E-01 | 0.19  | 3.42E-01 |
| C10orf113     | -0.08 | 6.89E-01 | -0.19 | 3.42E-01 |
| CA14          | -0.42 | 2.42E-02 | -0.19 | 3.42E-01 |
| KIAA1919      | 0.10  | 6.21E-01 | 0.19  | 3.42E-01 |
| LINC00243     | 0.20  | 2.97E-01 | -0.19 | 3.42E-01 |
| MIR570        | 0.17  | 3.97E-01 | -0.19 | 3.42E-01 |

|               |       |          |       |          |
|---------------|-------|----------|-------|----------|
| NAB1          | -0.10 | 6.03E-01 | -0.19 | 3.42E-01 |
| NARFL         | 0.19  | 3.22E-01 | 0.19  | 3.42E-01 |
| RAPGEF4-AS1   | 0.03  | 8.66E-01 | -0.19 | 3.42E-01 |
| RN7SL328P     | -0.09 | 6.50E-01 | -0.19 | 3.42E-01 |
| RNU4-48P      | -0.06 | 7.68E-01 | -0.19 | 3.42E-01 |
| RNU6-213P     | 0.07  | 7.24E-01 | 0.19  | 3.42E-01 |
| SLC25A26      | -0.05 | 7.83E-01 | 0.19  | 3.42E-01 |
| SPATA18       | -0.09 | 6.41E-01 | -0.19 | 3.42E-01 |
| STRBP         | -0.20 | 3.11E-01 | -0.19 | 3.42E-01 |
| ZNF638        | -0.25 | 1.94E-01 | -0.19 | 3.42E-01 |
| ZNF75BP       | -0.22 | 2.62E-01 | -0.19 | 3.42E-01 |
| AC006126.3    | -0.13 | 5.13E-01 | 0.19  | 3.43E-01 |
| AL050316.1    | -0.10 | 6.10E-01 | -0.19 | 3.43E-01 |
| ATP11B        | 0.20  | 3.20E-01 | 0.19  | 3.43E-01 |
| BORA          | -0.18 | 3.47E-01 | 0.19  | 3.43E-01 |
| C19orf67      | 0.16  | 4.27E-01 | 0.19  | 3.43E-01 |
| CITED4        | 0.16  | 4.24E-01 | 0.19  | 3.43E-01 |
| FNBP1L        | 0.00  | 9.94E-01 | -0.19 | 3.43E-01 |
| GNRH1         | -0.13 | 4.93E-01 | -0.19 | 3.43E-01 |
| GSTM3P2       | 0.11  | 5.78E-01 | 0.19  | 3.43E-01 |
| HCG14         | 0.01  | 9.79E-01 | -0.19 | 3.43E-01 |
| HHIP          | -0.32 | 9.93E-02 | -0.19 | 3.43E-01 |
| IGF1          | 0.08  | 6.84E-01 | 0.19  | 3.43E-01 |
| KB-1836B5.1   | 0.18  | 3.50E-01 | -0.19 | 3.43E-01 |
| KLKP1         | 0.11  | 5.66E-01 | -0.19 | 3.43E-01 |
| PDPK2P        | -0.01 | 9.44E-01 | 0.19  | 3.43E-01 |
| PLSCR4        | 0.11  | 5.66E-01 | 0.19  | 3.43E-01 |
| PRPF18        | -0.10 | 6.09E-01 | -0.19 | 3.43E-01 |
| RNU2-22P      | 0.15  | 4.48E-01 | -0.19 | 3.43E-01 |
| RNU6-1231P    | -0.05 | 8.19E-01 | 0.19  | 3.43E-01 |
| RP11-295G24.5 | -0.08 | 6.90E-01 | 0.19  | 3.43E-01 |
| RP11-303E16.2 | 0.22  | 2.59E-01 | -0.19 | 3.43E-01 |
| RP11-333A23.4 | 0.14  | 4.79E-01 | -0.19 | 3.43E-01 |
| RP11-592P9.3  | -0.28 | 1.46E-01 | 0.19  | 3.43E-01 |
| RP11-676J12.4 | -0.04 | 8.53E-01 | -0.19 | 3.43E-01 |
| RP4-604K5.3   | 0.01  | 9.67E-01 | 0.19  | 3.43E-01 |
| SCGB2B2       | 0.25  | 1.91E-01 | -0.19 | 3.43E-01 |
| SENP7         | -0.25 | 2.01E-01 | -0.19 | 3.43E-01 |
| SLFN12        | 0.18  | 3.52E-01 | 0.19  | 3.43E-01 |
| SPRR4         | 0.12  | 5.49E-01 | -0.19 | 3.43E-01 |
| TSKU          | 0.14  | 4.67E-01 | 0.19  | 3.43E-01 |
| XLOC_000647   | 0.34  | 7.74E-02 | 0.19  | 3.43E-01 |
| AC015987.1    | 0.15  | 4.39E-01 | -0.19 | 3.43E-01 |
| ADAM8         | 0.24  | 2.24E-01 | 0.19  | 3.43E-01 |
| AQP7P1        | -0.09 | 6.56E-01 | -0.19 | 3.43E-01 |
| BCL6          | 0.20  | 3.15E-01 | 0.19  | 3.43E-01 |
| CCNYL1        | -0.03 | 8.80E-01 | 0.19  | 3.43E-01 |



|               |       |          |       |          |
|---------------|-------|----------|-------|----------|
| CEP120        | 0.12  | 5.47E-01 | -0.19 | 3.43E-01 |
| CTD-2184D3.5  | -0.11 | 5.85E-01 | -0.19 | 3.43E-01 |
| GADD45B       | -0.10 | 5.99E-01 | 0.19  | 3.43E-01 |
| GNAL          | -0.44 | 2.04E-02 | -0.19 | 3.43E-01 |
| LINC01144     | 0.38  | 4.83E-02 | 0.19  | 3.43E-01 |
| LINC01305     | 0.04  | 8.26E-01 | 0.19  | 3.43E-01 |
| MIR580        | -0.16 | 4.26E-01 | -0.19 | 3.43E-01 |
| NEK4P1        | 0.06  | 7.55E-01 | 0.19  | 3.43E-01 |
| POSTN         | -0.36 | 5.64E-02 | 0.19  | 3.43E-01 |
| RN7SL684P     | -0.13 | 5.25E-01 | -0.19 | 3.43E-01 |
| RP1-102K2.9   | -0.16 | 4.26E-01 | 0.19  | 3.43E-01 |
| RP11-165D6.1  | -0.20 | 3.03E-01 | -0.19 | 3.43E-01 |
| RP11-174G6.1  | -0.30 | 1.21E-01 | -0.19 | 3.43E-01 |
| RP11-389C8.2  | 0.21  | 2.95E-01 | 0.19  | 3.43E-01 |
| RP11-656D10.6 | 0.10  | 6.02E-01 | 0.19  | 3.43E-01 |
| RPL35AP31     | -0.14 | 4.76E-01 | 0.19  | 3.43E-01 |
| RPS4XP6       | 0.14  | 4.92E-01 | -0.19 | 3.43E-01 |
| SLC44A2       | 0.03  | 8.67E-01 | 0.19  | 3.43E-01 |
| ZNF860        | 0.07  | 7.27E-01 | 0.19  | 3.43E-01 |
| CASC15        | -0.43 | 2.14E-02 | -0.19 | 3.44E-01 |
| CDKN2AIP      | 0.04  | 8.46E-01 | 0.19  | 3.44E-01 |
| CTC-232P5.4   | 0.29  | 1.36E-01 | -0.19 | 3.44E-01 |
| DPP10-AS1     | -0.11 | 5.91E-01 | -0.19 | 3.44E-01 |
| DVL3          | 0.06  | 7.64E-01 | 0.19  | 3.44E-01 |
| GTSF1         | 0.20  | 3.01E-01 | -0.19 | 3.44E-01 |
| HIRIP3        | -0.03 | 8.67E-01 | 0.19  | 3.44E-01 |
| HSPB9         | -0.18 | 3.52E-01 | 0.19  | 3.44E-01 |
| IGBP1P3       | -0.15 | 4.47E-01 | -0.19 | 3.44E-01 |
| ING4          | -0.05 | 8.14E-01 | 0.19  | 3.44E-01 |
| MARK1         | 0.13  | 4.93E-01 | 0.19  | 3.44E-01 |
| MIR1284       | -0.18 | 3.52E-01 | -0.19 | 3.44E-01 |
| MIR4664       | 0.05  | 8.14E-01 | 0.19  | 3.44E-01 |
| NFAM1         | 0.18  | 3.65E-01 | 0.19  | 3.44E-01 |
| NPM1P25       | 0.08  | 6.85E-01 | 0.19  | 3.44E-01 |
| PRR13P5       | -0.14 | 4.73E-01 | 0.19  | 3.44E-01 |
| RAB26         | -0.07 | 7.18E-01 | -0.19 | 3.44E-01 |
| RN7SL331P     | -0.58 | 1.10E-03 | -0.19 | 3.44E-01 |
| RNU6-1294P    | 0.00  | 9.86E-01 | -0.19 | 3.44E-01 |
| RP11-121A14.3 | 0.31  | 1.12E-01 | 0.19  | 3.44E-01 |
| RP11-697H9.5  | 0.12  | 5.42E-01 | -0.19 | 3.44E-01 |
| RP11-876N24.3 | -0.08 | 6.81E-01 | 0.19  | 3.44E-01 |
| RP5-915N17.11 | 0.10  | 6.01E-01 | -0.19 | 3.44E-01 |
| SLC25A46      | 0.04  | 8.58E-01 | -0.19 | 3.44E-01 |
| TMSB4XP4      | -0.17 | 3.76E-01 | -0.19 | 3.44E-01 |
| TUBB2B        | -0.23 | 2.44E-01 | -0.19 | 3.44E-01 |
| XLOC_004203   | 0.15  | 4.48E-01 | -0.19 | 3.44E-01 |
| AC007386.4    | -0.42 | 2.76E-02 | -0.19 | 3.45E-01 |

|                |       |          |       |          |
|----------------|-------|----------|-------|----------|
| AL355794.1     | 0.01  | 9.47E-01 | -0.19 | 3.45E-01 |
| CTD-2194D22.4  | 0.23  | 2.40E-01 | -0.19 | 3.45E-01 |
| DNAH10         | -0.09 | 6.41E-01 | -0.19 | 3.45E-01 |
| EFCAB11        | 0.03  | 8.69E-01 | -0.19 | 3.45E-01 |
| HNRNPA1P71     | -0.29 | 1.41E-01 | -0.19 | 3.45E-01 |
| RN7SL350P      | 0.19  | 3.36E-01 | -0.19 | 3.45E-01 |
| RNF150         | -0.36 | 6.22E-02 | -0.19 | 3.45E-01 |
| RP1-300G12.2   | 0.00  | 9.82E-01 | -0.19 | 3.45E-01 |
| RP11-167N5.5   | -0.14 | 4.88E-01 | -0.19 | 3.45E-01 |
| RP11-331F9.3   | 0.02  | 9.13E-01 | -0.19 | 3.45E-01 |
| RP11-76C10.4   | 0.10  | 6.29E-01 | -0.19 | 3.45E-01 |
| RP4-714D9.5    | 0.17  | 3.78E-01 | -0.19 | 3.45E-01 |
| AC112229.1     | -0.03 | 8.92E-01 | 0.19  | 3.45E-01 |
| CD2            | 0.19  | 3.20E-01 | 0.19  | 3.45E-01 |
| CDH1           | 0.14  | 4.66E-01 | 0.19  | 3.45E-01 |
| ERVMER34-1     | 0.18  | 3.52E-01 | 0.19  | 3.45E-01 |
| ITPRIP         | 0.15  | 4.33E-01 | 0.19  | 3.45E-01 |
| LDHC           | 0.07  | 7.35E-01 | 0.19  | 3.45E-01 |
| PITPNB         | 0.05  | 7.97E-01 | 0.19  | 3.45E-01 |
| PRND           | 0.11  | 5.61E-01 | 0.19  | 3.45E-01 |
| RN7SL648P      | 0.06  | 7.55E-01 | 0.19  | 3.45E-01 |
| RP11-650L12.2  | 0.07  | 7.16E-01 | 0.19  | 3.45E-01 |
| RPL23AP65      | 0.14  | 4.62E-01 | 0.19  | 3.45E-01 |
| WDR38          | 0.17  | 3.93E-01 | 0.19  | 3.45E-01 |
| AC066692.3     | -0.14 | 4.65E-01 | 0.19  | 3.46E-01 |
| AP1AR          | 0.11  | 5.68E-01 | -0.19 | 3.46E-01 |
| CIZ1           | 0.06  | 7.75E-01 | 0.19  | 3.46E-01 |
| CREBBP         | -0.06 | 7.80E-01 | 0.19  | 3.46E-01 |
| CRY1           | -0.03 | 8.87E-01 | -0.19 | 3.46E-01 |
| CYP3A7         | -0.03 | 8.78E-01 | 0.19  | 3.46E-01 |
| CYTH4          | 0.00  | 9.96E-01 | 0.19  | 3.46E-01 |
| DIRC2          | 0.34  | 7.82E-02 | 0.19  | 3.46E-01 |
| FAM86EP        | 0.23  | 2.49E-01 | -0.19 | 3.46E-01 |
| GDF15          | -0.05 | 8.00E-01 | 0.19  | 3.46E-01 |
| HNRNPD         | -0.07 | 7.14E-01 | -0.19 | 3.46E-01 |
| KIF20A         | 0.10  | 6.27E-01 | 0.19  | 3.46E-01 |
| MADCAM1        | -0.36 | 6.05E-02 | -0.19 | 3.46E-01 |
| NAB2           | -0.01 | 9.53E-01 | -0.19 | 3.46E-01 |
| PCMTD1         | -0.11 | 5.73E-01 | -0.19 | 3.46E-01 |
| PDE7A          | 0.13  | 4.96E-01 | 0.19  | 3.46E-01 |
| PIK3AP1        | 0.11  | 5.71E-01 | 0.19  | 3.46E-01 |
| PREX2          | -0.52 | 4.75E-03 | -0.19 | 3.46E-01 |
| PSPC1P1        | 0.41  | 3.01E-02 | 0.19  | 3.46E-01 |
| RHOBTB2        | -0.19 | 3.30E-01 | -0.19 | 3.46E-01 |
| RNU6-945P      | -0.17 | 4.00E-01 | 0.19  | 3.46E-01 |
| RP1-80N2.3     | 0.22  | 2.59E-01 | 0.19  | 3.46E-01 |
| RP11-1012A1.10 | -0.07 | 7.28E-01 | -0.19 | 3.46E-01 |

|               |       |          |       |          |
|---------------|-------|----------|-------|----------|
| RP11-200A1.1  | 0.11  | 5.71E-01 | 0.19  | 3.46E-01 |
| RP11-552F3.12 | -0.01 | 9.43E-01 | 0.19  | 3.46E-01 |
| RP11-57A19.2  | 0.11  | 5.66E-01 | 0.19  | 3.46E-01 |
| RP11-62C3.8   | -0.32 | 1.02E-01 | -0.19 | 3.46E-01 |
| RP11-845M18.6 | -0.36 | 6.15E-02 | 0.19  | 3.46E-01 |
| SNCA          | -0.30 | 1.23E-01 | -0.19 | 3.46E-01 |
| TMEM129       | 0.25  | 1.98E-01 | 0.19  | 3.46E-01 |
| TMEM185B      | 0.30  | 1.19E-01 | 0.19  | 3.46E-01 |
| ZNF630-AS1    | -0.19 | 3.25E-01 | 0.19  | 3.46E-01 |
| AC073343.13   | -0.24 | 2.10E-01 | -0.19 | 3.47E-01 |
| CTD-3051D23.1 | -0.25 | 1.91E-01 | -0.19 | 3.47E-01 |
| GNAI1         | 0.00  | 9.88E-01 | -0.19 | 3.47E-01 |
| LSM6          | 0.18  | 3.66E-01 | -0.19 | 3.47E-01 |
| NDN           | -0.01 | 9.48E-01 | -0.19 | 3.47E-01 |
| RP11-324L17.1 | -0.10 | 6.06E-01 | -0.19 | 3.47E-01 |
| RP11-90J7.3   | 0.24  | 2.16E-01 | -0.19 | 3.47E-01 |
| UTP18         | 0.17  | 3.93E-01 | -0.19 | 3.47E-01 |
| AC007312.3    | -0.13 | 5.18E-01 | 0.19  | 3.47E-01 |
| APEX1         | 0.09  | 6.38E-01 | 0.19  | 3.47E-01 |
| CD209         | 0.11  | 5.61E-01 | 0.19  | 3.47E-01 |
| CTC-507E2.2   | -0.15 | 4.57E-01 | 0.19  | 3.47E-01 |
| DOCK11        | 0.15  | 4.33E-01 | 0.19  | 3.47E-01 |
| FAAP100       | 0.18  | 3.66E-01 | 0.19  | 3.47E-01 |
| G42800        | -0.09 | 6.53E-01 | 0.19  | 3.47E-01 |
| HDAC1         | 0.42  | 2.74E-02 | 0.19  | 3.47E-01 |
| HEG1          | -0.20 | 3.04E-01 | 0.19  | 3.47E-01 |
| HHIPL2        | -0.07 | 7.15E-01 | 0.19  | 3.47E-01 |
| JAK3          | 0.10  | 6.17E-01 | 0.19  | 3.47E-01 |
| PRKCSH        | 0.14  | 4.79E-01 | 0.19  | 3.47E-01 |
| RP11-145A3.1  | -0.17 | 3.91E-01 | 0.19  | 3.47E-01 |
| RP11-255E6.5  | -0.33 | 8.16E-02 | 0.19  | 3.47E-01 |
| RP11-339N8.1  | 0.08  | 6.74E-01 | 0.19  | 3.47E-01 |
| RP11-7F17.7   | 0.07  | 7.35E-01 | 0.19  | 3.47E-01 |
| TC2N          | 0.64  | 2.58E-04 | 0.19  | 3.47E-01 |
| AC006028.11   | -0.35 | 6.48E-02 | 0.19  | 3.47E-01 |
| AL591069.1    | 0.10  | 5.98E-01 | -0.19 | 3.47E-01 |
| ALG1L13P      | -0.06 | 7.51E-01 | -0.19 | 3.47E-01 |
| AP006621.9    | -0.22 | 2.51E-01 | -0.19 | 3.47E-01 |
| CKMT1A        | -0.11 | 5.60E-01 | 0.19  | 3.47E-01 |
| COMMD7        | 0.09  | 6.60E-01 | 0.19  | 3.47E-01 |
| FMO9P         | 0.16  | 4.08E-01 | 0.19  | 3.47E-01 |
| HOXB3         | -0.03 | 8.82E-01 | 0.19  | 3.47E-01 |
| KRT38         | 0.15  | 4.54E-01 | 0.19  | 3.47E-01 |
| LINC-PINT     | -0.46 | 1.46E-02 | -0.19 | 3.47E-01 |
| MYCBP2-AS2    | 0.17  | 3.77E-01 | -0.19 | 3.47E-01 |
| MYNN          | -0.24 | 2.27E-01 | -0.19 | 3.47E-01 |
| NKAIN4        | -0.12 | 5.28E-01 | -0.19 | 3.47E-01 |

|                |       |          |       |          |
|----------------|-------|----------|-------|----------|
| PHKA1          | 0.02  | 9.02E-01 | 0.19  | 3.47E-01 |
| PLEK           | 0.09  | 6.39E-01 | 0.19  | 3.47E-01 |
| RP11-111F5.2   | -0.10 | 6.22E-01 | 0.19  | 3.47E-01 |
| RP11-320N21.2  | 0.19  | 3.24E-01 | 0.19  | 3.47E-01 |
| RP11-490E15.2  | -0.12 | 5.32E-01 | -0.19 | 3.47E-01 |
| RP11-575F12.3  | 0.12  | 5.45E-01 | -0.19 | 3.47E-01 |
| SCARNA13       | 0.10  | 6.14E-01 | 0.19  | 3.47E-01 |
| SNORD88A       | 0.08  | 6.71E-01 | 0.19  | 3.47E-01 |
| TAF4B          | -0.02 | 9.15E-01 | -0.19 | 3.47E-01 |
| U73166.2       | -0.27 | 1.68E-01 | -0.19 | 3.47E-01 |
| UBA52P5        | 0.14  | 4.81E-01 | 0.19  | 3.47E-01 |
| WASF3-AS1      | 0.06  | 7.51E-01 | -0.19 | 3.47E-01 |
| ZNF143         | 0.07  | 7.20E-01 | 0.19  | 3.47E-01 |
| CTD-2192J16.21 | 0.09  | 6.58E-01 | 0.19  | 3.48E-01 |
| DLX2           | -0.01 | 9.67E-01 | 0.19  | 3.48E-01 |
| EIF2AK3        | 0.15  | 4.38E-01 | -0.19 | 3.48E-01 |
| FKBP1AP2       | 0.08  | 6.82E-01 | -0.19 | 3.48E-01 |
| GRIFIN         | 0.04  | 8.40E-01 | -0.19 | 3.48E-01 |
| HAGHL          | -0.33 | 8.29E-02 | -0.19 | 3.48E-01 |
| HELLPAR        | -0.05 | 8.05E-01 | -0.19 | 3.48E-01 |
| HUNK           | -0.28 | 1.50E-01 | -0.19 | 3.48E-01 |
| LINC00894      | -0.13 | 5.03E-01 | -0.19 | 3.48E-01 |
| MEF2C-AS1      | -0.22 | 2.52E-01 | -0.19 | 3.48E-01 |
| RENBP          | -0.10 | 6.02E-01 | 0.19  | 3.48E-01 |
| RP1-265C24.5   | 0.15  | 4.57E-01 | 0.19  | 3.48E-01 |
| RP11-176H8.1   | -0.14 | 4.66E-01 | -0.19 | 3.48E-01 |
| RP11-325L12.5  | 0.23  | 2.38E-01 | -0.19 | 3.48E-01 |
| RP11-448A19.1  | -0.05 | 7.93E-01 | -0.19 | 3.48E-01 |
| RP4-665N4.8    | 0.10  | 6.02E-01 | -0.19 | 3.48E-01 |
| SNHG5          | -0.06 | 7.77E-01 | 0.19  | 3.48E-01 |
| STK33          | 0.19  | 3.46E-01 | -0.19 | 3.48E-01 |
| TTLL9          | -0.07 | 7.38E-01 | -0.19 | 3.48E-01 |
| XLOC_001242    | -0.03 | 8.67E-01 | -0.19 | 3.48E-01 |
| XLOC_007276    | 0.11  | 5.94E-01 | -0.19 | 3.48E-01 |
| YBEY           | -0.04 | 8.52E-01 | 0.19  | 3.48E-01 |
| ZFP69B         | 0.08  | 6.87E-01 | 0.19  | 3.48E-01 |
| AC004980.7     | -0.01 | 9.49E-01 | -0.19 | 3.49E-01 |
| AP3M2          | -0.12 | 5.41E-01 | -0.19 | 3.49E-01 |
| CKAP2L         | -0.03 | 8.97E-01 | 0.19  | 3.49E-01 |
| CTD-3224K15.3  | 0.29  | 1.36E-01 | 0.19  | 3.49E-01 |
| DYNC2H1        | -0.20 | 3.05E-01 | -0.19 | 3.49E-01 |
| GLB1L2         | -0.14 | 4.86E-01 | 0.19  | 3.49E-01 |
| H1FO           | 0.01  | 9.42E-01 | 0.19  | 3.49E-01 |
| HENMT1         | -0.04 | 8.33E-01 | 0.19  | 3.49E-01 |
| HIAT1          | 0.13  | 5.25E-01 | -0.19 | 3.49E-01 |
| MANEAL         | -0.20 | 2.98E-01 | 0.19  | 3.49E-01 |
| MIR4451        | -0.09 | 6.55E-01 | -0.19 | 3.49E-01 |

|                      |       |          |       |          |
|----------------------|-------|----------|-------|----------|
| <b>NBR1</b>          | -0.13 | 5.01E-01 | 0.19  | 3.49E-01 |
| <b>NKX3-1</b>        | 0.41  | 3.13E-02 | -0.19 | 3.49E-01 |
| <b>POLR3DP1</b>      | 0.09  | 6.44E-01 | -0.19 | 3.49E-01 |
| <b>PRX</b>           | 0.10  | 5.97E-01 | 0.19  | 3.49E-01 |
| <b>RP11-108K3.5</b>  | -0.31 | 1.06E-01 | 0.19  | 3.49E-01 |
| <b>RP11-287J9.1</b>  | -0.29 | 1.36E-01 | 0.19  | 3.49E-01 |
| <b>RP11-332O19.2</b> | -0.13 | 4.93E-01 | -0.19 | 3.49E-01 |
| <b>RP11-424M21.1</b> | -0.29 | 1.28E-01 | 0.19  | 3.49E-01 |
| <b>RP11-603B24.1</b> | 0.18  | 3.64E-01 | 0.19  | 3.49E-01 |
| <b>RP11-757O6.6</b>  | -0.38 | 4.39E-02 | -0.19 | 3.49E-01 |
| <b>RP11-796A5.3</b>  | -0.34 | 7.37E-02 | -0.19 | 3.49E-01 |
| <b>RPL3P4</b>        | -0.18 | 3.56E-01 | 0.19  | 3.49E-01 |
| <b>VCPKMT</b>        | 0.07  | 7.38E-01 | -0.19 | 3.49E-01 |
| <b>WFDC12</b>        | 0.09  | 6.61E-01 | 0.19  | 3.49E-01 |
| <b>ZNF660</b>        | 0.06  | 7.77E-01 | -0.19 | 3.49E-01 |
| <b>AC005363.11</b>   | -0.45 | 1.57E-02 | -0.19 | 3.50E-01 |
| <b>ATP2A1</b>        | -0.22 | 2.55E-01 | -0.19 | 3.50E-01 |
| <b>COL6A1</b>        | -0.10 | 6.04E-01 | 0.19  | 3.50E-01 |
| <b>CTB-58E17.5</b>   | -0.09 | 6.39E-01 | 0.19  | 3.50E-01 |
| <b>DNAJC30</b>       | 0.21  | 2.87E-01 | 0.19  | 3.50E-01 |
| <b>DRAP1</b>         | -0.05 | 7.98E-01 | -0.19 | 3.50E-01 |
| <b>FOXN2</b>         | 0.12  | 5.58E-01 | -0.19 | 3.50E-01 |
| <b>HTRA2</b>         | 0.19  | 3.41E-01 | 0.19  | 3.50E-01 |
| <b>KB-1410C5.1</b>   | -0.05 | 7.91E-01 | -0.19 | 3.50E-01 |
| <b>MIR4520A</b>      | -0.32 | 1.01E-01 | -0.19 | 3.50E-01 |
| <b>NCOR2</b>         | -0.11 | 5.86E-01 | 0.19  | 3.50E-01 |
| <b>PGM5P4</b>        | 0.02  | 9.26E-01 | -0.19 | 3.50E-01 |
| <b>PIP4K2B</b>       | 0.20  | 3.00E-01 | 0.19  | 3.50E-01 |
| <b>PLA2G4E</b>       | 0.21  | 2.83E-01 | 0.19  | 3.50E-01 |
| <b>RN7SL181P</b>     | -0.10 | 6.00E-01 | -0.19 | 3.50E-01 |
| <b>RNF40</b>         | 0.24  | 2.11E-01 | 0.19  | 3.50E-01 |
| <b>RNU6-1157P</b>    | -0.15 | 4.34E-01 | 0.19  | 3.50E-01 |
| <b>RNU6-216P</b>     | 0.07  | 7.38E-01 | -0.19 | 3.50E-01 |
| <b>RP11-123C21.3</b> | 0.29  | 1.34E-01 | 0.19  | 3.50E-01 |
| <b>RP11-468E2.10</b> | 0.05  | 7.87E-01 | -0.19 | 3.50E-01 |
| <b>RP11-701H24.3</b> | 0.10  | 6.21E-01 | -0.19 | 3.50E-01 |
| <b>TIPIN</b>         | 0.15  | 4.39E-01 | -0.19 | 3.50E-01 |
| <b>ZNF410</b>        | 0.23  | 2.40E-01 | -0.19 | 3.50E-01 |
| <b>FGGY</b>          | 0.16  | 4.24E-01 | -0.19 | 3.51E-01 |
| <b>FUBP1</b>         | 0.05  | 8.08E-01 | -0.19 | 3.51E-01 |
| <b>LINC01468</b>     | -0.08 | 6.97E-01 | -0.19 | 3.51E-01 |
| <b>MIR558</b>        | -0.15 | 4.36E-01 | -0.19 | 3.51E-01 |
| <b>MOCS2</b>         | 0.19  | 3.45E-01 | -0.19 | 3.51E-01 |
| <b>PHACTR2</b>       | 0.03  | 8.88E-01 | -0.19 | 3.51E-01 |
| <b>PSCA</b>          | 0.02  | 9.24E-01 | -0.19 | 3.51E-01 |
| <b>RANBP2</b>        | 0.02  | 9.32E-01 | -0.19 | 3.51E-01 |
| <b>RAPGEF6</b>       | -0.01 | 9.57E-01 | -0.19 | 3.51E-01 |

|                      |       |          |       |          |
|----------------------|-------|----------|-------|----------|
| <b>RP11-354P11.3</b> | 0.19  | 3.41E-01 | -0.19 | 3.51E-01 |
| <b>RP11-403I13.4</b> | -0.14 | 4.91E-01 | -0.19 | 3.51E-01 |
| <b>ZNF578</b>        | -0.35 | 6.94E-02 | -0.19 | 3.51E-01 |
| <b>AP000962.1</b>    | -0.13 | 5.09E-01 | 0.19  | 3.51E-01 |
| <b>AP001056.1</b>    | 0.06  | 7.70E-01 | 0.19  | 3.51E-01 |
| <b>CDIPT</b>         | 0.00  | 9.86E-01 | 0.19  | 3.51E-01 |
| <b>GSTA8P</b>        | 0.00  | 9.92E-01 | 0.19  | 3.51E-01 |
| <b>RAC3</b>          | -0.06 | 7.50E-01 | 0.19  | 3.51E-01 |
| <b>RP11-477G18.2</b> | 0.00  | 9.99E-01 | 0.19  | 3.51E-01 |
| <b>TNFSF8</b>        | -0.09 | 6.53E-01 | 0.19  | 3.51E-01 |
| <b>USP43</b>         | 0.25  | 2.03E-01 | 0.19  | 3.51E-01 |
| <b>WWP2</b>          | 0.08  | 6.92E-01 | 0.19  | 3.51E-01 |
| <b>AC091132.1</b>    | -0.08 | 6.91E-01 | 0.19  | 3.51E-01 |
| <b>AC128709.3</b>    | 0.09  | 6.40E-01 | 0.19  | 3.51E-01 |
| <b>AP001062.7</b>    | -0.19 | 3.32E-01 | -0.19 | 3.51E-01 |
| <b>BAHD1</b>         | 0.11  | 5.92E-01 | 0.19  | 3.51E-01 |
| <b>DNAJC16</b>       | 0.13  | 4.97E-01 | 0.19  | 3.51E-01 |
| <b>EIF4BP6</b>       | -0.08 | 6.75E-01 | -0.19 | 3.51E-01 |
| <b>FAAP24</b>        | 0.16  | 4.12E-01 | 0.19  | 3.51E-01 |
| <b>LMF2</b>          | 0.06  | 7.45E-01 | 0.19  | 3.51E-01 |
| <b>MTPAP</b>         | 0.08  | 6.77E-01 | -0.19 | 3.51E-01 |
| <b>NPPA-AS1</b>      | -0.19 | 3.31E-01 | -0.19 | 3.51E-01 |
| <b>OPN3</b>          | -0.20 | 2.97E-01 | -0.19 | 3.51E-01 |
| <b>P2RX7</b>         | -0.13 | 5.00E-01 | -0.19 | 3.51E-01 |
| <b>RBBP8P1</b>       | 0.19  | 3.24E-01 | 0.19  | 3.51E-01 |
| <b>RP1-59D14.5</b>   | 0.00  | 1.00E+00 | -0.19 | 3.51E-01 |
| <b>RP11-10C8.2</b>   | -0.01 | 9.75E-01 | -0.19 | 3.51E-01 |
| <b>RP11-304F15.4</b> | 0.08  | 6.90E-01 | -0.19 | 3.51E-01 |
| <b>RPL28</b>         | 0.11  | 5.81E-01 | 0.19  | 3.51E-01 |
| <b>SLC25A17</b>      | -0.01 | 9.42E-01 | -0.19 | 3.51E-01 |
| <b>SNORD38</b>       | -0.09 | 6.35E-01 | 0.19  | 3.51E-01 |
| <b>ST13P15</b>       | 0.16  | 4.13E-01 | -0.19 | 3.51E-01 |
| <b>TNFRSF9</b>       | 0.36  | 5.64E-02 | 0.19  | 3.51E-01 |
| <b>USB1</b>          | 0.13  | 5.10E-01 | 0.19  | 3.51E-01 |
| <b>XLOC_007629</b>   | -0.14 | 4.86E-01 | -0.19 | 3.51E-01 |
| <b>XLOC_009475</b>   | 0.20  | 3.03E-01 | 0.19  | 3.51E-01 |
| <b>XLOC_012002</b>   | -0.03 | 8.76E-01 | -0.19 | 3.51E-01 |
| <b>ZNF365</b>        | 0.11  | 5.82E-01 | 0.19  | 3.51E-01 |
| <b>ARHGAP26-AS1</b>  | -0.11 | 5.86E-01 | -0.19 | 3.52E-01 |
| <b>C1GALT1P1</b>     | -0.23 | 2.32E-01 | -0.19 | 3.52E-01 |
| <b>C20orf195</b>     | 0.20  | 3.00E-01 | 0.19  | 3.52E-01 |
| <b>CAPN7</b>         | -0.17 | 3.83E-01 | -0.19 | 3.52E-01 |
| <b>COX7A2P1</b>      | 0.19  | 3.31E-01 | 0.19  | 3.52E-01 |
| <b>CTD-2024I7.18</b> | 0.33  | 9.01E-02 | 0.19  | 3.52E-01 |
| <b>FRMPD4</b>        | -0.01 | 9.46E-01 | 0.19  | 3.52E-01 |
| <b>GHRLOS</b>        | 0.12  | 5.47E-01 | -0.19 | 3.52E-01 |
| <b>LSM14B</b>        | -0.01 | 9.51E-01 | 0.19  | 3.52E-01 |

|               |       |          |       |          |
|---------------|-------|----------|-------|----------|
| MEPCE         | 0.41  | 2.92E-02 | 0.19  | 3.52E-01 |
| MUC4          | 0.20  | 3.14E-01 | -0.19 | 3.52E-01 |
| NDFIP2        | 0.00  | 9.80E-01 | -0.19 | 3.52E-01 |
| NIPSNAP3A     | -0.09 | 6.39E-01 | -0.19 | 3.52E-01 |
| RAB25         | 0.33  | 9.12E-02 | 0.19  | 3.52E-01 |
| RPL21P132     | -0.07 | 7.27E-01 | -0.19 | 3.52E-01 |
| RPL23AP82     | -0.34 | 7.77E-02 | -0.19 | 3.52E-01 |
| SETP21        | 0.08  | 6.98E-01 | 0.19  | 3.52E-01 |
| SLC36A2       | -0.21 | 2.82E-01 | -0.19 | 3.52E-01 |
| TMIGD2        | 0.08  | 6.80E-01 | -0.19 | 3.52E-01 |
| TRAPPC2       | -0.24 | 2.15E-01 | -0.19 | 3.52E-01 |
| XLOC_007096   | 0.47  | 1.09E-02 | 0.19  | 3.52E-01 |
| ARRDC3        | -0.01 | 9.43E-01 | 0.19  | 3.53E-01 |
| CCHCR1        | 0.01  | 9.66E-01 | 0.19  | 3.53E-01 |
| CTD-2154B17.2 | 0.21  | 2.94E-01 | 0.19  | 3.53E-01 |
| EMC6          | 0.23  | 2.33E-01 | 0.19  | 3.53E-01 |
| NINJ2         | 0.19  | 3.40E-01 | 0.19  | 3.53E-01 |
| POMT2         | -0.17 | 3.82E-01 | 0.19  | 3.53E-01 |
| RNU4-59P      | 0.10  | 6.04E-01 | -0.19 | 3.53E-01 |
| RP11-138P22.1 | 0.15  | 4.36E-01 | -0.19 | 3.53E-01 |
| RP13-225O21.5 | 0.19  | 3.22E-01 | -0.19 | 3.53E-01 |
| RP5-1085F17.3 | 0.03  | 8.83E-01 | -0.19 | 3.53E-01 |
| SHB           | 0.20  | 2.98E-01 | 0.19  | 3.53E-01 |
| UMODL1        | 0.03  | 8.86E-01 | 0.19  | 3.53E-01 |
| ZNF185        | 0.11  | 5.67E-01 | -0.19 | 3.53E-01 |
| BATF3         | -0.12 | 5.36E-01 | 0.19  | 3.54E-01 |
| BDKRB2        | 0.02  | 9.25E-01 | 0.19  | 3.54E-01 |
| BHLHB9        | -0.21 | 2.80E-01 | 0.19  | 3.54E-01 |
| CCDC8         | -0.20 | 3.06E-01 | 0.19  | 3.54E-01 |
| GALNT7        | -0.17 | 4.01E-01 | 0.19  | 3.54E-01 |
| OGFOD2        | -0.02 | 9.17E-01 | 0.19  | 3.54E-01 |
| PRRX2-AS1     | -0.11 | 5.85E-01 | 0.19  | 3.54E-01 |
| PTP4A3        | 0.16  | 4.19E-01 | 0.19  | 3.54E-01 |
| RELB          | 0.09  | 6.34E-01 | 0.19  | 3.54E-01 |
| RP11-478C1.7  | 0.06  | 7.73E-01 | 0.19  | 3.54E-01 |
| SLC25A1       | 0.25  | 1.95E-01 | 0.19  | 3.54E-01 |
| TMPRSS11A     | 0.26  | 1.87E-01 | 0.19  | 3.54E-01 |
| ZNF703        | -0.20 | 3.18E-01 | 0.19  | 3.54E-01 |
| C11orf63      | -0.04 | 8.57E-01 | -0.19 | 3.54E-01 |
| C1orf53       | -0.15 | 4.42E-01 | -0.19 | 3.54E-01 |
| CHKA          | -0.30 | 1.17E-01 | -0.19 | 3.54E-01 |
| ESM1          | 0.17  | 3.96E-01 | -0.19 | 3.54E-01 |
| G41882        | -0.22 | 2.67E-01 | -0.19 | 3.54E-01 |
| HSP90AA2P     | -0.27 | 1.71E-01 | -0.19 | 3.54E-01 |
| MRPS9         | -0.06 | 7.69E-01 | -0.19 | 3.54E-01 |
| PROC          | -0.25 | 2.08E-01 | -0.19 | 3.54E-01 |
| PSMA3-AS1     | -0.28 | 1.46E-01 | -0.19 | 3.54E-01 |

|                       |       |          |       |          |
|-----------------------|-------|----------|-------|----------|
| <b>RN7SL805P</b>      | 0.15  | 4.36E-01 | -0.19 | 3.54E-01 |
| <b>RP11-133N21.10</b> | -0.33 | 8.21E-02 | -0.19 | 3.54E-01 |
| <b>RP11-412D9.4</b>   | 0.31  | 1.13E-01 | -0.19 | 3.54E-01 |
| <b>RP11-640L9.1</b>   | 0.19  | 3.26E-01 | -0.19 | 3.54E-01 |
| <b>RP5-1165K10.2</b>  | -0.16 | 4.26E-01 | -0.19 | 3.54E-01 |
| <b>TBX3</b>           | -0.16 | 4.26E-01 | -0.19 | 3.54E-01 |
| <b>ZNF100</b>         | -0.02 | 9.08E-01 | -0.19 | 3.54E-01 |
| <b>ZNF451</b>         | 0.21  | 2.73E-01 | -0.19 | 3.54E-01 |
| <b>AC004538.3</b>     | -0.04 | 8.50E-01 | 0.19  | 3.55E-01 |
| <b>AC006947.1</b>     | -0.09 | 6.66E-01 | 0.19  | 3.55E-01 |
| <b>ANKDD1B</b>        | -0.28 | 1.54E-01 | -0.19 | 3.55E-01 |
| <b>ATHL1</b>          | -0.03 | 8.82E-01 | -0.19 | 3.55E-01 |
| <b>CERS2</b>          | 0.05  | 8.07E-01 | 0.19  | 3.55E-01 |
| <b>CRIP2</b>          | -0.27 | 1.70E-01 | -0.19 | 3.55E-01 |
| <b>CTB-152G17.6</b>   | 0.05  | 8.02E-01 | -0.19 | 3.55E-01 |
| <b>CYP4A22-AS1</b>    | -0.08 | 6.89E-01 | 0.19  | 3.55E-01 |
| <b>G34552</b>         | -0.22 | 2.66E-01 | 0.19  | 3.55E-01 |
| <b>GPR146</b>         | -0.53 | 3.87E-03 | 0.19  | 3.55E-01 |
| <b>HHIPL1</b>         | 0.17  | 3.81E-01 | 0.19  | 3.55E-01 |
| <b>LAG3</b>           | 0.02  | 9.18E-01 | 0.19  | 3.55E-01 |
| <b>LMCD1</b>          | -0.34 | 7.39E-02 | -0.19 | 3.55E-01 |
| <b>MBD6</b>           | -0.14 | 4.73E-01 | 0.19  | 3.55E-01 |
| <b>MESDC1</b>         | 0.39  | 4.28E-02 | 0.19  | 3.55E-01 |
| <b>NUDT16</b>         | 0.02  | 9.10E-01 | 0.19  | 3.55E-01 |
| <b>PSMG4</b>          | -0.12 | 5.37E-01 | -0.19 | 3.55E-01 |
| <b>RGS13</b>          | -0.14 | 4.66E-01 | -0.19 | 3.55E-01 |
| <b>RNU7-18P</b>       | 0.13  | 5.26E-01 | -0.19 | 3.55E-01 |
| <b>RP11-131K5.2</b>   | -0.26 | 1.77E-01 | 0.19  | 3.55E-01 |
| <b>RP11-478C6.5</b>   | -0.13 | 5.18E-01 | -0.19 | 3.55E-01 |
| <b>RP11-521B24.4</b>  | 0.14  | 4.91E-01 | 0.19  | 3.55E-01 |
| <b>RP11-799D4.4</b>   | 0.17  | 3.93E-01 | 0.19  | 3.55E-01 |
| <b>SLC35B2</b>        | 0.21  | 2.84E-01 | 0.19  | 3.55E-01 |
| <b>SNORA47</b>        | 0.02  | 9.32E-01 | 0.19  | 3.55E-01 |
| <b>TMEM52</b>         | -0.08 | 7.03E-01 | -0.19 | 3.55E-01 |
| <b>TPCN1</b>          | -0.09 | 6.58E-01 | 0.19  | 3.55E-01 |
| <b>TRAPPC6B</b>       | 0.50  | 6.68E-03 | 0.19  | 3.55E-01 |
| <b>ARMS2</b>          | -0.08 | 6.68E-01 | 0.19  | 3.55E-01 |
| <b>C16orf59</b>       | 0.03  | 8.63E-01 | 0.19  | 3.55E-01 |
| <b>C18orf65</b>       | 0.28  | 1.51E-01 | 0.19  | 3.55E-01 |
| <b>COQ4</b>           | 0.26  | 1.77E-01 | 0.19  | 3.55E-01 |
| <b>DCX</b>            | -0.38 | 4.64E-02 | -0.19 | 3.55E-01 |
| <b>DOCK3</b>          | -0.02 | 9.10E-01 | -0.19 | 3.55E-01 |
| <b>FAM195B</b>        | -0.01 | 9.63E-01 | 0.19  | 3.55E-01 |
| <b>G22304</b>         | 0.01  | 9.59E-01 | -0.19 | 3.55E-01 |
| <b>GFPT1</b>          | -0.05 | 8.19E-01 | -0.19 | 3.55E-01 |
| <b>GGT8P</b>          | -0.01 | 9.66E-01 | -0.19 | 3.55E-01 |
| <b>GPR85</b>          | -0.11 | 5.74E-01 | -0.19 | 3.55E-01 |



|               |       |          |       |          |
|---------------|-------|----------|-------|----------|
| LONP2         | 0.11  | 5.66E-01 | -0.19 | 3.55E-01 |
| LRTM1         | 0.45  | 1.70E-02 | 0.19  | 3.55E-01 |
| MIR3936       | -0.01 | 9.59E-01 | -0.19 | 3.55E-01 |
| MTND1P3       | -0.11 | 5.71E-01 | -0.19 | 3.55E-01 |
| PLCB2         | -0.12 | 5.29E-01 | 0.19  | 3.55E-01 |
| PLOD1         | 0.01  | 9.50E-01 | 0.19  | 3.55E-01 |
| PPP1R26-AS1   | -0.11 | 5.77E-01 | 0.19  | 3.55E-01 |
| RCSD1         | 0.03  | 8.61E-01 | 0.19  | 3.55E-01 |
| RNA5SP227     | 0.12  | 5.59E-01 | 0.19  | 3.55E-01 |
| RP11-158I9.8  | -0.04 | 8.29E-01 | -0.19 | 3.55E-01 |
| RP11-170K4.2  | -0.11 | 5.60E-01 | -0.19 | 3.55E-01 |
| RP11-258F22.2 | -0.14 | 4.72E-01 | -0.19 | 3.55E-01 |
| RP11-290D2.5  | -0.27 | 1.72E-01 | 0.19  | 3.55E-01 |
| RP11-307L14.1 | 0.12  | 5.37E-01 | -0.19 | 3.55E-01 |
| RP11-760L24.1 | -0.27 | 1.59E-01 | 0.19  | 3.55E-01 |
| RP11-970I2.6  | -0.21 | 2.87E-01 | -0.19 | 3.55E-01 |
| RP5-903G2.2   | -0.02 | 9.16E-01 | 0.19  | 3.55E-01 |
| TICRR         | -0.01 | 9.72E-01 | 0.19  | 3.55E-01 |
| ZBTB12        | 0.31  | 1.11E-01 | 0.19  | 3.55E-01 |
| ACACA         | -0.04 | 8.24E-01 | 0.18  | 3.56E-01 |
| ARNTL2        | 0.20  | 3.14E-01 | 0.18  | 3.56E-01 |
| ASB4          | 0.16  | 4.16E-01 | 0.18  | 3.56E-01 |
| COG1          | -0.33 | 8.70E-02 | 0.18  | 3.56E-01 |
| ELP3          | 0.24  | 2.26E-01 | 0.18  | 3.56E-01 |
| HLA-DPB1      | 0.09  | 6.52E-01 | 0.18  | 3.56E-01 |
| IQGAP2        | 0.31  | 1.10E-01 | 0.18  | 3.56E-01 |
| RP11-5P18.1   | -0.24 | 2.19E-01 | 0.18  | 3.56E-01 |
| TCEB2         | 0.09  | 6.61E-01 | 0.18  | 3.56E-01 |
| AC104772.1    | -0.14 | 4.87E-01 | -0.18 | 3.56E-01 |
| AGXT          | -0.14 | 4.72E-01 | -0.18 | 3.56E-01 |
| ANKRD33B      | -0.41 | 3.19E-02 | -0.18 | 3.56E-01 |
| CTC-303L1.1   | -0.09 | 6.52E-01 | -0.18 | 3.56E-01 |
| CYP2B7P       | 0.02  | 9.00E-01 | -0.18 | 3.56E-01 |
| FRG1BP        | 0.13  | 5.00E-01 | -0.18 | 3.56E-01 |
| LINC01356     | -0.14 | 4.65E-01 | -0.18 | 3.56E-01 |
| RNU6-1267P    | -0.21 | 2.83E-01 | -0.18 | 3.56E-01 |
| RP11-127B20.3 | 0.13  | 5.17E-01 | -0.18 | 3.56E-01 |
| RP11-131K5.1  | 0.24  | 2.20E-01 | -0.18 | 3.56E-01 |
| RP11-173G21.1 | -0.34 | 8.10E-02 | -0.18 | 3.56E-01 |
| RP11-669C19.1 | 0.13  | 4.95E-01 | -0.18 | 3.56E-01 |
| RP11-96H17.1  | -0.24 | 2.22E-01 | -0.18 | 3.56E-01 |
| RPS20         | 0.24  | 2.11E-01 | -0.18 | 3.56E-01 |
| RPS7          | 0.13  | 5.06E-01 | -0.18 | 3.56E-01 |
| SENP3         | 0.02  | 9.05E-01 | -0.18 | 3.56E-01 |
| TESK1         | -0.20 | 3.11E-01 | -0.18 | 3.56E-01 |
| XLOC_006578   | -0.24 | 2.25E-01 | -0.18 | 3.56E-01 |
| AC090696.2    | -0.01 | 9.46E-01 | -0.18 | 3.57E-01 |

|                |       |          |       |          |
|----------------|-------|----------|-------|----------|
| AC096772.6     | -0.19 | 3.21E-01 | -0.18 | 3.57E-01 |
| CTD-2124B8.2   | 0.13  | 5.09E-01 | -0.18 | 3.57E-01 |
| CTD-2199O4.6   | -0.03 | 8.92E-01 | -0.18 | 3.57E-01 |
| DBF4           | 0.02  | 9.26E-01 | -0.18 | 3.57E-01 |
| DBP            | -0.19 | 3.26E-01 | -0.18 | 3.57E-01 |
| G33445         | 0.34  | 8.05E-02 | -0.18 | 3.57E-01 |
| GSTO2          | -0.28 | 1.55E-01 | -0.18 | 3.57E-01 |
| LINC01354      | -0.02 | 9.34E-01 | -0.18 | 3.57E-01 |
| MTRR           | 0.27  | 1.57E-01 | -0.18 | 3.57E-01 |
| NUP153         | 0.15  | 4.57E-01 | -0.18 | 3.57E-01 |
| PMPCB          | -0.11 | 5.71E-01 | -0.18 | 3.57E-01 |
| RP11-15F12.3   | -0.08 | 6.96E-01 | -0.18 | 3.57E-01 |
| RP11-634H22.1  | 0.09  | 6.58E-01 | -0.18 | 3.57E-01 |
| RP11-69L16.5   | -0.15 | 4.41E-01 | -0.18 | 3.57E-01 |
| RP11-95P13.1   | -0.24 | 2.12E-01 | -0.18 | 3.57E-01 |
| RP3-495K2.2    | -0.14 | 4.72E-01 | -0.18 | 3.57E-01 |
| TET2-AS1       | -0.19 | 3.43E-01 | -0.18 | 3.57E-01 |
| AC005522.7     | 0.05  | 8.05E-01 | 0.18  | 3.57E-01 |
| ALKBH4         | 0.21  | 2.75E-01 | 0.18  | 3.57E-01 |
| BET1L          | 0.15  | 4.44E-01 | 0.18  | 3.57E-01 |
| CDK10          | 0.02  | 9.11E-01 | 0.18  | 3.57E-01 |
| CTD-3252C9.2   | 0.19  | 3.24E-01 | 0.18  | 3.57E-01 |
| FAM131B        | 0.11  | 5.61E-01 | 0.18  | 3.57E-01 |
| IQSEC3         | -0.23 | 2.49E-01 | 0.18  | 3.57E-01 |
| ITGA2B         | -0.37 | 5.27E-02 | 0.18  | 3.57E-01 |
| MAPK3          | 0.07  | 7.39E-01 | 0.18  | 3.57E-01 |
| NDEL1          | 0.00  | 9.89E-01 | 0.18  | 3.57E-01 |
| PACS2          | 0.30  | 1.25E-01 | 0.18  | 3.57E-01 |
| PLEKHF1        | -0.12 | 5.47E-01 | 0.18  | 3.57E-01 |
| RP11-1396O13.1 | 0.03  | 8.64E-01 | 0.18  | 3.57E-01 |
| SLC1A3         | 0.42  | 2.77E-02 | 0.18  | 3.57E-01 |
| ALDH6A1        | 0.12  | 5.57E-01 | -0.18 | 3.58E-01 |
| CCDC158        | -0.02 | 9.32E-01 | -0.18 | 3.58E-01 |
| CSNK2A2        | -0.04 | 8.33E-01 | 0.18  | 3.58E-01 |
| CTC-329D1.2    | -0.17 | 3.87E-01 | -0.18 | 3.58E-01 |
| EBF3           | -0.25 | 2.06E-01 | 0.18  | 3.58E-01 |
| FAM220A        | -0.02 | 9.27E-01 | 0.18  | 3.58E-01 |
| FZD7           | -0.16 | 4.03E-01 | -0.18 | 3.58E-01 |
| HNRNPC         | 0.20  | 3.14E-01 | -0.18 | 3.58E-01 |
| MT-ATP6        | 0.19  | 3.44E-01 | 0.18  | 3.58E-01 |
| NANOG          | 0.04  | 8.26E-01 | -0.18 | 3.58E-01 |
| OR7E28P        | 0.15  | 4.31E-01 | 0.18  | 3.58E-01 |
| P2RY13         | 0.09  | 6.35E-01 | -0.18 | 3.58E-01 |
| PCK1           | 0.35  | 7.17E-02 | 0.18  | 3.58E-01 |
| POU2AF1        | 0.40  | 3.60E-02 | 0.18  | 3.58E-01 |
| RAD9B          | 0.00  | 1.00E+00 | -0.18 | 3.58E-01 |
| RALGPS2        | 0.24  | 2.18E-01 | 0.18  | 3.58E-01 |

|                      |       |          |       |          |
|----------------------|-------|----------|-------|----------|
| <b>RNF180</b>        | -0.11 | 5.68E-01 | -0.18 | 3.58E-01 |
| <b>ROCK2</b>         | -0.07 | 7.33E-01 | -0.18 | 3.58E-01 |
| <b>RP1-315G1.1</b>   | 0.11  | 5.80E-01 | 0.18  | 3.58E-01 |
| <b>RP11-710C12.1</b> | -0.15 | 4.61E-01 | -0.18 | 3.58E-01 |
| <b>RP11-737O24.2</b> | 0.03  | 8.91E-01 | 0.18  | 3.58E-01 |
| <b>SCAF4</b>         | -0.01 | 9.47E-01 | 0.18  | 3.58E-01 |
| <b>SIGLEC6</b>       | 0.01  | 9.77E-01 | 0.18  | 3.58E-01 |
| <b>AC002044.1</b>    | -0.16 | 4.27E-01 | 0.18  | 3.59E-01 |
| <b>C12orf56</b>      | 0.24  | 2.13E-01 | 0.18  | 3.59E-01 |
| <b>CFAP52</b>        | 0.49  | 8.07E-03 | 0.18  | 3.59E-01 |
| <b>CHEK2</b>         | 0.07  | 7.36E-01 | 0.18  | 3.59E-01 |
| <b>DAP3P1</b>        | -0.37 | 5.42E-02 | -0.18 | 3.59E-01 |
| <b>FAM229A</b>       | -0.28 | 1.51E-01 | -0.18 | 3.59E-01 |
| <b>FNBP1P1</b>       | -0.10 | 6.23E-01 | 0.18  | 3.59E-01 |
| <b>G25497</b>        | 0.07  | 7.31E-01 | -0.18 | 3.59E-01 |
| <b>G26059</b>        | -0.04 | 8.49E-01 | -0.18 | 3.59E-01 |
| <b>G5552</b>         | 0.08  | 6.99E-01 | 0.18  | 3.59E-01 |
| <b>GMCL1</b>         | 0.25  | 2.04E-01 | 0.18  | 3.59E-01 |
| <b>HOXA11</b>        | -0.07 | 7.21E-01 | 0.18  | 3.59E-01 |
| <b>LRRC3</b>         | 0.23  | 2.35E-01 | 0.18  | 3.59E-01 |
| <b>MIR624</b>        | -0.30 | 1.25E-01 | -0.18 | 3.59E-01 |
| <b>NHLH1</b>         | 0.18  | 3.49E-01 | -0.18 | 3.59E-01 |
| <b>PHF20</b>         | 0.06  | 7.78E-01 | 0.18  | 3.59E-01 |
| <b>PLB1</b>          | 0.13  | 5.17E-01 | 0.18  | 3.59E-01 |
| <b>RN7SL812P</b>     | -0.10 | 5.96E-01 | 0.18  | 3.59E-01 |
| <b>RP1-74B13.2</b>   | -0.22 | 2.52E-01 | -0.18 | 3.59E-01 |
| <b>RP11-1252I4.2</b> | 0.16  | 4.16E-01 | 0.18  | 3.59E-01 |
| <b>RP11-139H15.7</b> | -0.03 | 8.92E-01 | -0.18 | 3.59E-01 |
| <b>RP11-39E3.3</b>   | -0.06 | 7.64E-01 | -0.18 | 3.59E-01 |
| <b>RP11-613C6.2</b>  | -0.06 | 7.63E-01 | -0.18 | 3.59E-01 |
| <b>RP4-651E10.4</b>  | -0.10 | 6.29E-01 | -0.18 | 3.59E-01 |
| <b>RSPH10B</b>       | 0.03  | 8.92E-01 | -0.18 | 3.59E-01 |
| <b>SYT17</b>         | 0.00  | 9.94E-01 | 0.18  | 3.59E-01 |
| <b>THAP7-AS1</b>     | 0.21  | 2.87E-01 | 0.18  | 3.59E-01 |
| <b>TOR1B</b>         | 0.18  | 3.60E-01 | 0.18  | 3.59E-01 |
| <b>VN1R107P</b>      | -0.08 | 7.04E-01 | -0.18 | 3.59E-01 |
| <b>VWA5A</b>         | -0.04 | 8.37E-01 | 0.18  | 3.59E-01 |
| <b>ZNF462</b>        | 0.01  | 9.64E-01 | 0.18  | 3.59E-01 |
| <b>ZNF83</b>         | -0.04 | 8.51E-01 | -0.18 | 3.59E-01 |
| <b>ABHD17C</b>       | 0.15  | 4.47E-01 | 0.18  | 3.59E-01 |
| <b>AC010884.1</b>    | -0.09 | 6.43E-01 | -0.18 | 3.59E-01 |
| <b>AIFM1</b>         | 0.25  | 1.93E-01 | 0.18  | 3.59E-01 |
| <b>ANOS1</b>         | 0.09  | 6.32E-01 | 0.18  | 3.59E-01 |
| <b>CTD-2215E18.1</b> | -0.20 | 3.09E-01 | -0.18 | 3.59E-01 |
| <b>DNER</b>          | -0.12 | 5.41E-01 | 0.18  | 3.59E-01 |
| <b>G15458</b>        | -0.14 | 4.80E-01 | -0.18 | 3.59E-01 |
| <b>G36419</b>        | -0.06 | 7.66E-01 | -0.18 | 3.59E-01 |

|                |       |          |       |          |
|----------------|-------|----------|-------|----------|
| HABP2          | 0.36  | 6.15E-02 | 0.18  | 3.59E-01 |
| HIST1H4K       | -0.10 | 6.19E-01 | 0.18  | 3.59E-01 |
| HNRNPA3P6      | 0.11  | 5.81E-01 | 0.18  | 3.59E-01 |
| KCNS1          | 0.02  | 9.35E-01 | 0.18  | 3.59E-01 |
| LSM5           | 0.09  | 6.43E-01 | -0.18 | 3.59E-01 |
| MRPS18B        | 0.04  | 8.44E-01 | 0.18  | 3.59E-01 |
| MYC            | 0.38  | 4.46E-02 | 0.18  | 3.59E-01 |
| PTRHD1         | -0.01 | 9.59E-01 | 0.18  | 3.59E-01 |
| RP11-10K16.1   | -0.23 | 2.29E-01 | -0.18 | 3.59E-01 |
| RP11-205A8.4   | -0.01 | 9.77E-01 | -0.18 | 3.59E-01 |
| RP11-355F16.1  | -0.08 | 6.73E-01 | -0.18 | 3.59E-01 |
| RP11-568J23.4  | -0.12 | 5.29E-01 | -0.18 | 3.59E-01 |
| RP11-946P6.6   | 0.02  | 9.15E-01 | -0.18 | 3.59E-01 |
| RP4-677H15.4   | -0.07 | 7.30E-01 | -0.18 | 3.59E-01 |
| SCGB3A1        | -0.04 | 8.27E-01 | 0.18  | 3.59E-01 |
| STK11IP        | -0.07 | 7.07E-01 | 0.18  | 3.59E-01 |
| TNFSF4         | -0.40 | 3.51E-02 | 0.18  | 3.59E-01 |
| TTLL12         | 0.08  | 6.88E-01 | 0.18  | 3.59E-01 |
| UBB            | 0.07  | 7.14E-01 | 0.18  | 3.59E-01 |
| VTCN1          | -0.11 | 5.61E-01 | -0.18 | 3.59E-01 |
| YY1            | -0.11 | 5.62E-01 | -0.18 | 3.59E-01 |
| ZNF300P1       | 0.13  | 5.22E-01 | -0.18 | 3.59E-01 |
| C11orf58       | 0.11  | 5.74E-01 | -0.18 | 3.60E-01 |
| CSNK2A1        | 0.17  | 3.99E-01 | -0.18 | 3.60E-01 |
| CST6           | -0.04 | 8.52E-01 | -0.18 | 3.60E-01 |
| CTD-2336O2.3   | 0.18  | 3.65E-01 | -0.18 | 3.60E-01 |
| FAF1           | 0.10  | 6.28E-01 | -0.18 | 3.60E-01 |
| FGF22          | -0.15 | 4.55E-01 | -0.18 | 3.60E-01 |
| G11043         | -0.29 | 1.28E-01 | -0.18 | 3.60E-01 |
| G25511         | 0.20  | 3.02E-01 | -0.18 | 3.60E-01 |
| HIVEP2         | -0.01 | 9.63E-01 | -0.18 | 3.60E-01 |
| HNRNPCP6       | -0.01 | 9.74E-01 | -0.18 | 3.60E-01 |
| HS3ST3B1       | 0.23  | 2.32E-01 | 0.18  | 3.60E-01 |
| LCAT           | 0.06  | 7.53E-01 | 0.18  | 3.60E-01 |
| LSM3           | -0.11 | 5.90E-01 | -0.18 | 3.60E-01 |
| PROCR          | 0.20  | 2.97E-01 | 0.18  | 3.60E-01 |
| PTPN2P2        | -0.16 | 4.07E-01 | -0.18 | 3.60E-01 |
| RP11-115D19.4  | -0.33 | 9.04E-02 | -0.18 | 3.60E-01 |
| RP11-1252D15.1 | -0.13 | 5.01E-01 | 0.18  | 3.60E-01 |
| RP11-195E2.1   | -0.35 | 6.70E-02 | 0.18  | 3.60E-01 |
| RP11-332M2.1   | 0.04  | 8.57E-01 | 0.18  | 3.60E-01 |
| RP11-525A16.4  | -0.19 | 3.34E-01 | 0.18  | 3.60E-01 |
| RP3-465N24.6   | -0.37 | 5.20E-02 | -0.18 | 3.60E-01 |
| RP5-1033H22.2  | -0.38 | 4.78E-02 | -0.18 | 3.60E-01 |
| SBF1           | 0.14  | 4.74E-01 | 0.18  | 3.60E-01 |
| SH3BGRL        | 0.19  | 3.43E-01 | 0.18  | 3.60E-01 |
| SNORA70G       | -0.04 | 8.44E-01 | 0.18  | 3.60E-01 |

|               |       |          |       |          |
|---------------|-------|----------|-------|----------|
| SPATA6L       | 0.18  | 3.53E-01 | -0.18 | 3.60E-01 |
| SUMO1P3       | 0.01  | 9.65E-01 | 0.18  | 3.60E-01 |
| SUMO2P8       | -0.03 | 8.85E-01 | -0.18 | 3.60E-01 |
| TBC1D25       | 0.15  | 4.54E-01 | 0.18  | 3.60E-01 |
| TMEM179B      | 0.13  | 5.10E-01 | 0.18  | 3.60E-01 |
| USP32P3       | 0.13  | 5.09E-01 | -0.18 | 3.60E-01 |
| ZNF506        | -0.14 | 4.72E-01 | -0.18 | 3.60E-01 |
| AC007279.2    | -0.20 | 2.97E-01 | 0.18  | 3.61E-01 |
| AF186192.5    | 0.32  | 9.62E-02 | 0.18  | 3.61E-01 |
| CD207         | 0.11  | 5.62E-01 | -0.18 | 3.61E-01 |
| CTB-49A3.4    | -0.34 | 7.61E-02 | 0.18  | 3.61E-01 |
| CTC-550B14.6  | -0.11 | 5.66E-01 | -0.18 | 3.61E-01 |
| CTD-2516F10.4 | 0.05  | 7.91E-01 | 0.18  | 3.61E-01 |
| EGR4          | 0.11  | 5.64E-01 | 0.18  | 3.61E-01 |
| GS1-590J6.3   | -0.06 | 7.71E-01 | -0.18 | 3.61E-01 |
| HM13          | 0.38  | 4.92E-02 | 0.18  | 3.61E-01 |
| MTND5P15      | 0.00  | 9.94E-01 | -0.18 | 3.61E-01 |
| PDXK          | 0.13  | 5.26E-01 | 0.18  | 3.61E-01 |
| RP11-37C7.3   | 0.11  | 5.61E-01 | -0.18 | 3.61E-01 |
| RP11-395C3.1  | 0.19  | 3.45E-01 | -0.18 | 3.61E-01 |
| RP11-403A21.3 | -0.16 | 4.24E-01 | -0.18 | 3.61E-01 |
| RP11-417L19.2 | 0.16  | 4.24E-01 | -0.18 | 3.61E-01 |
| RP3-508I15.10 | 0.05  | 8.03E-01 | -0.18 | 3.61E-01 |
| TMEM8B        | -0.24 | 2.14E-01 | -0.18 | 3.61E-01 |
| TTC21B-AS1    | -0.03 | 8.81E-01 | -0.18 | 3.61E-01 |
| AC006019.4    | 0.05  | 7.83E-01 | -0.18 | 3.62E-01 |
| CRHR1-IT1     | -0.05 | 8.18E-01 | -0.18 | 3.62E-01 |
| CTD-2600H12.2 | -0.29 | 1.36E-01 | -0.18 | 3.62E-01 |
| FBXW8         | -0.15 | 4.59E-01 | 0.18  | 3.62E-01 |
| G10989        | 0.02  | 9.04E-01 | 0.18  | 3.62E-01 |
| HRH1          | -0.09 | 6.40E-01 | 0.18  | 3.62E-01 |
| IFT88         | -0.29 | 1.28E-01 | -0.18 | 3.62E-01 |
| KRT73-AS1     | -0.33 | 8.64E-02 | -0.18 | 3.62E-01 |
| MIR1273C      | 0.07  | 7.31E-01 | 0.18  | 3.62E-01 |
| NUDT14        | 0.21  | 2.82E-01 | 0.18  | 3.62E-01 |
| PBLD          | -0.03 | 8.62E-01 | 0.18  | 3.62E-01 |
| PMM2          | 0.24  | 2.11E-01 | 0.18  | 3.62E-01 |
| RP11-1055B8.4 | -0.30 | 1.16E-01 | -0.18 | 3.62E-01 |
| RP11-274B21.1 | -0.01 | 9.49E-01 | -0.18 | 3.62E-01 |
| RP11-354M20.3 | 0.14  | 4.72E-01 | -0.18 | 3.62E-01 |
| RP11-367N14.3 | -0.08 | 6.88E-01 | -0.18 | 3.62E-01 |
| RP11-466F5.8  | 0.20  | 3.17E-01 | -0.18 | 3.62E-01 |
| RP11-54A4.2   | -0.14 | 4.86E-01 | 0.18  | 3.62E-01 |
| SLED1         | 0.03  | 8.69E-01 | 0.18  | 3.62E-01 |
| TP53          | 0.09  | 6.53E-01 | 0.18  | 3.62E-01 |
| USP17L2       | 0.07  | 7.30E-01 | -0.18 | 3.62E-01 |
| XPNPEP3       | -0.07 | 7.16E-01 | 0.18  | 3.62E-01 |

|                       |       |          |       |          |
|-----------------------|-------|----------|-------|----------|
| <b>AC073130.3</b>     | 0.23  | 2.48E-01 | 0.18  | 3.63E-01 |
| <b>AC106053.1</b>     | -0.17 | 3.87E-01 | 0.18  | 3.63E-01 |
| <b>C17orf80</b>       | 0.13  | 5.15E-01 | 0.18  | 3.63E-01 |
| <b>CHMP4B</b>         | 0.06  | 7.79E-01 | 0.18  | 3.63E-01 |
| <b>FAM109B</b>        | 0.23  | 2.37E-01 | 0.18  | 3.63E-01 |
| <b>GBP4</b>           | 0.26  | 1.87E-01 | 0.18  | 3.63E-01 |
| <b>MICALL1</b>        | 0.40  | 3.66E-02 | 0.18  | 3.63E-01 |
| <b>MIR3153</b>        | -0.14 | 4.67E-01 | 0.18  | 3.63E-01 |
| <b>PPP2R5D</b>        | -0.07 | 7.41E-01 | 0.18  | 3.63E-01 |
| <b>RP11-291B21.2</b>  | 0.25  | 2.08E-01 | 0.18  | 3.63E-01 |
| <b>RP4-758J18.13</b>  | 0.09  | 6.48E-01 | 0.18  | 3.63E-01 |
| <b>RP5-1065J22.8</b>  | 0.50  | 6.89E-03 | 0.18  | 3.63E-01 |
| <b>SLFN11</b>         | -0.14 | 4.70E-01 | 0.18  | 3.63E-01 |
| <b>SNORD3B-2</b>      | 0.02  | 9.09E-01 | 0.18  | 3.63E-01 |
| <b>SYNE4</b>          | 0.12  | 5.57E-01 | 0.18  | 3.63E-01 |
| <b>AC007392.3</b>     | 0.01  | 9.56E-01 | -0.18 | 3.63E-01 |
| <b>ANKRD1</b>         | 0.03  | 8.82E-01 | -0.18 | 3.63E-01 |
| <b>C1orf146</b>       | 0.03  | 8.85E-01 | -0.18 | 3.63E-01 |
| <b>CARD19</b>         | -0.03 | 8.90E-01 | -0.18 | 3.63E-01 |
| <b>G23532</b>         | -0.03 | 8.95E-01 | -0.18 | 3.63E-01 |
| <b>HMG1</b>           | 0.00  | 9.86E-01 | -0.18 | 3.63E-01 |
| <b>MIR3128</b>        | -0.06 | 7.78E-01 | -0.18 | 3.63E-01 |
| <b>MIR920</b>         | -0.22 | 2.58E-01 | -0.18 | 3.63E-01 |
| <b>MYO15B</b>         | -0.10 | 6.30E-01 | -0.18 | 3.63E-01 |
| <b>PNLIPRP3</b>       | 0.52  | 4.99E-03 | -0.18 | 3.63E-01 |
| <b>PTGFR</b>          | -0.22 | 2.52E-01 | -0.18 | 3.63E-01 |
| <b>TMED8</b>          | 0.30  | 1.23E-01 | -0.18 | 3.63E-01 |
| <b>UBE2G2</b>         | -0.23 | 2.36E-01 | -0.18 | 3.63E-01 |
| <b>ZNF764</b>         | -0.18 | 3.69E-01 | -0.18 | 3.63E-01 |
| <b>AC010642.2</b>     | 0.11  | 5.68E-01 | -0.18 | 3.63E-01 |
| <b>CTD-2540L5.9</b>   | -0.23 | 2.48E-01 | -0.18 | 3.63E-01 |
| <b>G26553</b>         | -0.04 | 8.39E-01 | -0.18 | 3.63E-01 |
| <b>LINC01621</b>      | -0.17 | 3.86E-01 | -0.18 | 3.63E-01 |
| <b>MIR4637</b>        | 0.13  | 5.10E-01 | -0.18 | 3.63E-01 |
| <b>MROH2A</b>         | 0.07  | 7.42E-01 | -0.18 | 3.63E-01 |
| <b>MSI2</b>           | 0.28  | 1.43E-01 | -0.18 | 3.63E-01 |
| <b>NMU</b>            | -0.19 | 3.28E-01 | -0.18 | 3.63E-01 |
| <b>RNU6-786P</b>      | 0.08  | 6.83E-01 | -0.18 | 3.63E-01 |
| <b>RP11-108P20.2</b>  | -0.35 | 6.84E-02 | -0.18 | 3.63E-01 |
| <b>RP11-574K11.29</b> | -0.04 | 8.53E-01 | -0.18 | 3.63E-01 |
| <b>RP11-649A18.4</b>  | 0.12  | 5.48E-01 | -0.18 | 3.63E-01 |
| <b>RP11-925D8.3</b>   | -0.08 | 6.68E-01 | -0.18 | 3.63E-01 |
| <b>SEPHS1P1</b>       | -0.49 | 7.71E-03 | -0.18 | 3.63E-01 |
| <b>XLOC_011550</b>    | -0.02 | 9.20E-01 | -0.18 | 3.63E-01 |
| <b>AC141928.1</b>     | -0.17 | 3.79E-01 | 0.18  | 3.63E-01 |
| <b>ADRA1D</b>         | 0.05  | 8.13E-01 | 0.18  | 3.63E-01 |
| <b>IL20</b>           | 0.13  | 5.06E-01 | 0.18  | 3.63E-01 |

|                      |       |          |       |          |
|----------------------|-------|----------|-------|----------|
| <b>RNU6-769P</b>     | -0.07 | 7.21E-01 | 0.18  | 3.63E-01 |
| <b>RP11-77P16.4</b>  | 0.14  | 4.80E-01 | 0.18  | 3.63E-01 |
| <b>SRP68</b>         | 0.20  | 3.02E-01 | 0.18  | 3.63E-01 |
| <b>STAT3</b>         | 0.22  | 2.62E-01 | 0.18  | 3.63E-01 |
| <b>TAF3</b>          | -0.38 | 4.51E-02 | 0.18  | 3.63E-01 |
| <b>AC138969.4</b>    | -0.04 | 8.44E-01 | -0.18 | 3.64E-01 |
| <b>ALS2CL</b>        | -0.24 | 2.28E-01 | -0.18 | 3.64E-01 |
| <b>ARMC8</b>         | 0.07  | 7.24E-01 | -0.18 | 3.64E-01 |
| <b>C12orf43</b>      | 0.16  | 4.21E-01 | 0.18  | 3.64E-01 |
| <b>C14orf119</b>     | 0.10  | 6.07E-01 | 0.18  | 3.64E-01 |
| <b>CFAP70</b>        | 0.01  | 9.45E-01 | -0.18 | 3.64E-01 |
| <b>CTD-2017C7.1</b>  | -0.25 | 2.02E-01 | -0.18 | 3.64E-01 |
| <b>DTD2</b>          | 0.12  | 5.28E-01 | 0.18  | 3.64E-01 |
| <b>FAM83A-AS1</b>    | 0.32  | 9.18E-02 | 0.18  | 3.64E-01 |
| <b>FBXL7</b>         | -0.31 | 1.14E-01 | -0.18 | 3.64E-01 |
| <b>FCGR2A</b>        | 0.16  | 4.06E-01 | 0.18  | 3.64E-01 |
| <b>FLT1</b>          | 0.05  | 7.99E-01 | -0.18 | 3.64E-01 |
| <b>FNDC4</b>         | -0.03 | 8.82E-01 | -0.18 | 3.64E-01 |
| <b>GLTSCR1L</b>      | -0.09 | 6.61E-01 | 0.18  | 3.64E-01 |
| <b>HSPA4L</b>        | 0.11  | 5.88E-01 | -0.18 | 3.64E-01 |
| <b>ISLR</b>          | -0.35 | 6.48E-02 | 0.18  | 3.64E-01 |
| <b>KRT10</b>         | -0.01 | 9.47E-01 | 0.18  | 3.64E-01 |
| <b>MIR548AA1</b>     | -0.13 | 5.07E-01 | -0.18 | 3.64E-01 |
| <b>RP11-142M10.2</b> | 0.23  | 2.43E-01 | -0.18 | 3.64E-01 |
| <b>RP11-315I20.1</b> | -0.30 | 1.24E-01 | 0.18  | 3.64E-01 |
| <b>RP5-1074L1.1</b>  | -0.11 | 5.62E-01 | 0.18  | 3.64E-01 |
| <b>SAMM50</b>        | 0.15  | 4.45E-01 | 0.18  | 3.64E-01 |
| <b>SOCS4</b>         | 0.17  | 3.80E-01 | -0.18 | 3.64E-01 |
| <b>TARBP2</b>        | 0.10  | 6.02E-01 | 0.18  | 3.64E-01 |
| <b>TNFRSF14</b>      | -0.07 | 7.21E-01 | 0.18  | 3.64E-01 |
| <b>WAC-AS1</b>       | 0.38  | 4.90E-02 | 0.18  | 3.64E-01 |
| <b>XLOC_006132</b>   | 0.14  | 4.66E-01 | 0.18  | 3.64E-01 |
| <b>ZNF273</b>        | 0.05  | 8.04E-01 | -0.18 | 3.64E-01 |
| <b>ACTR3C</b>        | -0.01 | 9.49E-01 | 0.18  | 3.65E-01 |
| <b>AL391994.1</b>    | 0.19  | 3.34E-01 | 0.18  | 3.65E-01 |
| <b>BRCA2</b>         | 0.04  | 8.35E-01 | -0.18 | 3.65E-01 |
| <b>CASC1</b>         | -0.10 | 5.95E-01 | -0.18 | 3.65E-01 |
| <b>CD28</b>          | 0.05  | 7.82E-01 | 0.18  | 3.65E-01 |
| <b>CTD-2095E4.4</b>  | -0.01 | 9.50E-01 | -0.18 | 3.65E-01 |
| <b>DQX1</b>          | -0.09 | 6.39E-01 | 0.18  | 3.65E-01 |
| <b>DUSP14</b>        | 0.07  | 7.21E-01 | 0.18  | 3.65E-01 |
| <b>FOLH1</b>         | 0.22  | 2.53E-01 | 0.18  | 3.65E-01 |
| <b>GJB7</b>          | -0.34 | 7.59E-02 | -0.18 | 3.65E-01 |
| <b>HOTAIR</b>        | 0.14  | 4.71E-01 | 0.18  | 3.65E-01 |
| <b>KIAA0586</b>      | 0.09  | 6.62E-01 | 0.18  | 3.65E-01 |
| <b>KLC2</b>          | 0.27  | 1.71E-01 | 0.18  | 3.65E-01 |
| <b>MIR3681HG</b>     | -0.10 | 5.99E-01 | 0.18  | 3.65E-01 |

|                       |       |          |       |          |
|-----------------------|-------|----------|-------|----------|
| <b>NFE2L3</b>         | 0.28  | 1.50E-01 | 0.18  | 3.65E-01 |
| <b>RNU6-407P</b>      | 0.21  | 2.81E-01 | -0.18 | 3.65E-01 |
| <b>RNU7-75P</b>       | -0.12 | 5.56E-01 | -0.18 | 3.65E-01 |
| <b>RP11-17P16.1</b>   | -0.02 | 9.24E-01 | 0.18  | 3.65E-01 |
| <b>RP11-545G3.1</b>   | -0.12 | 5.58E-01 | -0.18 | 3.65E-01 |
| <b>RPS12P27</b>       | -0.04 | 8.25E-01 | -0.18 | 3.65E-01 |
| <b>SAXO1</b>          | 0.10  | 6.01E-01 | -0.18 | 3.65E-01 |
| <b>SCP2</b>           | -0.06 | 7.51E-01 | -0.18 | 3.65E-01 |
| <b>STARD3NL</b>       | 0.23  | 2.32E-01 | -0.18 | 3.65E-01 |
| <b>TONSL-AS1</b>      | 0.41  | 3.17E-02 | -0.18 | 3.65E-01 |
| <b>WFDC3</b>          | -0.34 | 8.02E-02 | -0.18 | 3.65E-01 |
| <b>ZNF280D</b>        | -0.42 | 2.42E-02 | -0.18 | 3.65E-01 |
| <b>ABCC3</b>          | -0.22 | 2.63E-01 | -0.18 | 3.66E-01 |
| <b>ADCYAP1</b>        | 0.28  | 1.47E-01 | 0.18  | 3.66E-01 |
| <b>ANKMY2</b>         | 0.26  | 1.78E-01 | 0.18  | 3.66E-01 |
| <b>ATP5J2-PTCD1</b>   | -0.24 | 2.27E-01 | 0.18  | 3.66E-01 |
| <b>CD300E</b>         | 0.04  | 8.45E-01 | 0.18  | 3.66E-01 |
| <b>CITF22-92A6.2</b>  | 0.21  | 2.73E-01 | 0.18  | 3.66E-01 |
| <b>FAM102B</b>        | 0.09  | 6.36E-01 | -0.18 | 3.66E-01 |
| <b>G22509</b>         | -0.07 | 7.15E-01 | 0.18  | 3.66E-01 |
| <b>G34302</b>         | -0.01 | 9.46E-01 | 0.18  | 3.66E-01 |
| <b>NDUFS7</b>         | 0.19  | 3.22E-01 | 0.18  | 3.66E-01 |
| <b>PNPLA2</b>         | 0.05  | 7.84E-01 | 0.18  | 3.66E-01 |
| <b>PRKCDBP</b>        | -0.28 | 1.44E-01 | 0.18  | 3.66E-01 |
| <b>RN7SL787P</b>      | -0.28 | 1.46E-01 | -0.18 | 3.66E-01 |
| <b>RP1-283E3.4</b>    | -0.50 | 6.86E-03 | -0.18 | 3.66E-01 |
| <b>RP11-1055B8.10</b> | 0.05  | 8.18E-01 | -0.18 | 3.66E-01 |
| <b>RP11-286H14.8</b>  | -0.04 | 8.43E-01 | -0.18 | 3.66E-01 |
| <b>RP11-35G9.3</b>    | 0.18  | 3.50E-01 | 0.18  | 3.66E-01 |
| <b>RP11-452L6.6</b>   | -0.02 | 9.06E-01 | -0.18 | 3.66E-01 |
| <b>RP11-532F6.4</b>   | -0.07 | 7.16E-01 | -0.18 | 3.66E-01 |
| <b>RP11-705O1.8</b>   | 0.15  | 4.43E-01 | -0.18 | 3.66E-01 |
| <b>SNORA15</b>        | -0.14 | 4.65E-01 | 0.18  | 3.66E-01 |
| <b>SNORA49</b>        | -0.11 | 5.74E-01 | 0.18  | 3.66E-01 |
| <b>STIM2</b>          | 0.19  | 3.44E-01 | 0.18  | 3.66E-01 |
| <b>TMEM45B</b>        | 0.38  | 4.33E-02 | 0.18  | 3.66E-01 |
| <b>TP53I13</b>        | 0.14  | 4.83E-01 | 0.18  | 3.66E-01 |
| <b>VPS53</b>          | 0.02  | 9.02E-01 | 0.18  | 3.66E-01 |
| <b>XLOC_008674</b>    | -0.04 | 8.26E-01 | -0.18 | 3.66E-01 |
| <b>Z69666.2</b>       | -0.22 | 2.68E-01 | 0.18  | 3.66E-01 |
| <b>ZFYVE1</b>         | -0.10 | 5.97E-01 | 0.18  | 3.66E-01 |
| <b>AC017083.2</b>     | 0.10  | 6.28E-01 | -0.18 | 3.67E-01 |
| <b>AC137932.4</b>     | -0.12 | 5.38E-01 | -0.18 | 3.67E-01 |
| <b>ACTG2</b>          | 0.10  | 6.26E-01 | 0.18  | 3.67E-01 |
| <b>ASB8</b>           | -0.20 | 3.08E-01 | 0.18  | 3.67E-01 |
| <b>ATP5S</b>          | -0.33 | 8.37E-02 | -0.18 | 3.67E-01 |
| <b>CKMT1B</b>         | 0.33  | 8.16E-02 | 0.18  | 3.67E-01 |



|                      |       |          |       |          |
|----------------------|-------|----------|-------|----------|
| <b>CTA-243E7.2</b>   | 0.05  | 8.15E-01 | -0.18 | 3.67E-01 |
| <b>CYSRT1</b>        | 0.11  | 5.85E-01 | 0.18  | 3.67E-01 |
| <b>DHX36</b>         | 0.16  | 4.23E-01 | -0.18 | 3.67E-01 |
| <b>DLST</b>          | 0.17  | 3.98E-01 | 0.18  | 3.67E-01 |
| <b>ECH1</b>          | 0.43  | 2.21E-02 | 0.18  | 3.67E-01 |
| <b>ENTPD1</b>        | 0.11  | 5.60E-01 | 0.18  | 3.67E-01 |
| <b>FICD</b>          | -0.20 | 3.17E-01 | -0.18 | 3.67E-01 |
| <b>G35259</b>        | -0.18 | 3.60E-01 | -0.18 | 3.67E-01 |
| <b>HMOX2</b>         | 0.29  | 1.30E-01 | 0.18  | 3.67E-01 |
| <b>INO80B</b>        | 0.13  | 5.04E-01 | -0.18 | 3.67E-01 |
| <b>KIF18B</b>        | 0.13  | 5.19E-01 | 0.18  | 3.67E-01 |
| <b>LINC00592</b>     | -0.01 | 9.42E-01 | 0.18  | 3.67E-01 |
| <b>PSENE1</b>        | 0.05  | 8.10E-01 | -0.18 | 3.67E-01 |
| <b>RP11-110I1.14</b> | 0.19  | 3.34E-01 | -0.18 | 3.67E-01 |
| <b>RP4-584D14.6</b>  | 0.09  | 6.42E-01 | 0.18  | 3.67E-01 |
| <b>RUFY1</b>         | 0.01  | 9.79E-01 | 0.18  | 3.67E-01 |
| <b>SEPT7P3</b>       | -0.10 | 6.05E-01 | -0.18 | 3.67E-01 |
| <b>SLBP</b>          | -0.07 | 7.18E-01 | -0.18 | 3.67E-01 |
| <b>USP2</b>          | 0.10  | 6.15E-01 | 0.18  | 3.67E-01 |
| <b>WDFY2</b>         | 0.02  | 9.23E-01 | 0.18  | 3.67E-01 |
| <b>ADAM22</b>        | -0.03 | 8.83E-01 | -0.18 | 3.68E-01 |
| <b>CAMKV</b>         | -0.20 | 3.07E-01 | -0.18 | 3.68E-01 |
| <b>CDKN2C</b>        | 0.10  | 6.02E-01 | 0.18  | 3.68E-01 |
| <b>CHCHD4P2</b>      | -0.21 | 2.89E-01 | -0.18 | 3.68E-01 |
| <b>CTD-2325P2.3</b>  | -0.04 | 8.52E-01 | 0.18  | 3.68E-01 |
| <b>ENOX1-AS1</b>     | -0.12 | 5.29E-01 | 0.18  | 3.68E-01 |
| <b>FAM208A</b>       | -0.01 | 9.66E-01 | 0.18  | 3.68E-01 |
| <b>FLJ13224</b>      | -0.05 | 7.87E-01 | -0.18 | 3.68E-01 |
| <b>GPC4</b>          | -0.27 | 1.72E-01 | -0.18 | 3.68E-01 |
| <b>LRR6</b>          | -0.09 | 6.33E-01 | -0.18 | 3.68E-01 |
| <b>MAN2B2</b>        | -0.40 | 3.72E-02 | 0.18  | 3.68E-01 |
| <b>MON2</b>          | 0.05  | 8.08E-01 | -0.18 | 3.68E-01 |
| <b>NUBP2</b>         | 0.17  | 3.90E-01 | 0.18  | 3.68E-01 |
| <b>PRSS22</b>        | 0.10  | 6.11E-01 | 0.18  | 3.68E-01 |
| <b>QPCT</b>          | 0.00  | 9.98E-01 | -0.18 | 3.68E-01 |
| <b>RNF24</b>         | 0.02  | 9.28E-01 | -0.18 | 3.68E-01 |
| <b>RP11-128A17.2</b> | 0.16  | 4.25E-01 | -0.18 | 3.68E-01 |
| <b>RP11-170L3.4</b>  | -0.13 | 5.10E-01 | 0.18  | 3.68E-01 |
| <b>RP11-379H18.1</b> | 0.08  | 7.00E-01 | 0.18  | 3.68E-01 |
| <b>RP11-401L13.7</b> | -0.06 | 7.50E-01 | 0.18  | 3.68E-01 |
| <b>RP11-45A17.2</b>  | -0.20 | 3.10E-01 | 0.18  | 3.68E-01 |
| <b>RP11-527J8.1</b>  | 0.08  | 6.86E-01 | -0.18 | 3.68E-01 |
| <b>RP11-723D22.2</b> | -0.20 | 3.01E-01 | -0.18 | 3.68E-01 |
| <b>SEC11C</b>        | 0.03  | 8.99E-01 | -0.18 | 3.68E-01 |
| <b>TMEM75</b>        | -0.01 | 9.43E-01 | -0.18 | 3.68E-01 |
| <b>ZSCAN31</b>       | 0.14  | 4.91E-01 | 0.18  | 3.68E-01 |
| <b>AC009404.2</b>    | -0.13 | 5.19E-01 | -0.18 | 3.68E-01 |

|                      |       |          |       |          |
|----------------------|-------|----------|-------|----------|
| <b>AC114765.1</b>    | 0.08  | 6.78E-01 | 0.18  | 3.68E-01 |
| <b>ATG9B</b>         | 0.11  | 5.79E-01 | 0.18  | 3.68E-01 |
| <b>CDK2</b>          | -0.29 | 1.30E-01 | -0.18 | 3.68E-01 |
| <b>CFTR</b>          | -0.02 | 9.35E-01 | -0.18 | 3.68E-01 |
| <b>EZH1</b>          | -0.07 | 7.41E-01 | 0.18  | 3.68E-01 |
| <b>FABP4</b>         | 0.15  | 4.48E-01 | -0.18 | 3.68E-01 |
| <b>FAM166A</b>       | -0.05 | 8.09E-01 | -0.18 | 3.68E-01 |
| <b>FTLP8</b>         | -0.14 | 4.84E-01 | -0.18 | 3.68E-01 |
| <b>GRIP2</b>         | 0.37  | 5.40E-02 | 0.18  | 3.68E-01 |
| <b>KB-1471A8.1</b>   | 0.12  | 5.27E-01 | 0.18  | 3.68E-01 |
| <b>LINC00426</b>     | 0.29  | 1.36E-01 | 0.18  | 3.68E-01 |
| <b>MRAP2</b>         | 0.32  | 9.93E-02 | 0.18  | 3.68E-01 |
| <b>NANOGP2</b>       | -0.18 | 3.48E-01 | 0.18  | 3.68E-01 |
| <b>OR7E108P</b>      | 0.30  | 1.18E-01 | 0.18  | 3.68E-01 |
| <b>PCDHB16</b>       | -0.23 | 2.32E-01 | -0.18 | 3.68E-01 |
| <b>RNF181</b>        | 0.16  | 4.10E-01 | 0.18  | 3.68E-01 |
| <b>RNF7</b>          | 0.09  | 6.58E-01 | 0.18  | 3.68E-01 |
| <b>RNU4-30P</b>      | -0.24 | 2.25E-01 | 0.18  | 3.68E-01 |
| <b>RP11-169K17.4</b> | 0.24  | 2.14E-01 | -0.18 | 3.68E-01 |
| <b>RP11-284J1.1</b>  | -0.51 | 5.35E-03 | -0.18 | 3.68E-01 |
| <b>RP11-460N20.7</b> | 0.03  | 8.91E-01 | -0.18 | 3.68E-01 |
| <b>RP11-493E3.1</b>  | -0.09 | 6.48E-01 | -0.18 | 3.68E-01 |
| <b>RPL26P9</b>       | -0.16 | 4.15E-01 | 0.18  | 3.68E-01 |
| <b>TTYH2</b>         | -0.38 | 4.57E-02 | 0.18  | 3.68E-01 |
| <b>ZRANB2</b>        | -0.23 | 2.35E-01 | -0.18 | 3.68E-01 |
| <b>CTD-2287O16.1</b> | 0.03  | 8.86E-01 | 0.18  | 3.69E-01 |
| <b>CYB5R3</b>        | -0.13 | 4.95E-01 | 0.18  | 3.69E-01 |
| <b>CYP4F22</b>       | 0.27  | 1.67E-01 | 0.18  | 3.69E-01 |
| <b>G25248</b>        | 0.13  | 5.01E-01 | 0.18  | 3.69E-01 |
| <b>IL25</b>          | 0.09  | 6.34E-01 | 0.18  | 3.69E-01 |
| <b>LUCAT1</b>        | 0.11  | 5.73E-01 | 0.18  | 3.69E-01 |
| <b>RP11-360O19.5</b> | -0.16 | 4.29E-01 | 0.18  | 3.69E-01 |
| <b>RPA1</b>          | 0.03  | 8.88E-01 | 0.18  | 3.69E-01 |
| <b>SYVN1</b>         | 0.06  | 7.44E-01 | 0.18  | 3.69E-01 |
| <b>UBASH3A</b>       | 0.37  | 5.48E-02 | 0.18  | 3.69E-01 |
| <b>AC011999.1</b>    | -0.04 | 8.51E-01 | -0.18 | 3.69E-01 |
| <b>AL133243.1</b>    | -0.21 | 2.95E-01 | -0.18 | 3.69E-01 |
| <b>ARHGAP39</b>      | 0.04  | 8.57E-01 | -0.18 | 3.69E-01 |
| <b>CEP170</b>        | -0.23 | 2.40E-01 | -0.18 | 3.69E-01 |
| <b>CTD-2203K17.1</b> | -0.13 | 5.19E-01 | -0.18 | 3.69E-01 |
| <b>HCFC2</b>         | -0.04 | 8.48E-01 | -0.18 | 3.69E-01 |
| <b>LINC01298</b>     | -0.20 | 2.98E-01 | -0.18 | 3.69E-01 |
| <b>NUFIP2</b>        | 0.36  | 6.37E-02 | -0.18 | 3.69E-01 |
| <b>RP11-162A12.4</b> | 0.23  | 2.32E-01 | -0.18 | 3.69E-01 |
| <b>RP11-255P5.2</b>  | -0.06 | 7.64E-01 | -0.18 | 3.69E-01 |
| <b>RP11-395I6.3</b>  | -0.01 | 9.79E-01 | -0.18 | 3.69E-01 |
| <b>RP11-680F20.6</b> | -0.04 | 8.30E-01 | -0.18 | 3.69E-01 |

|                |       |          |       |          |
|----------------|-------|----------|-------|----------|
| SLC25A34       | -0.02 | 9.14E-01 | -0.18 | 3.69E-01 |
| ZFR2           | -0.37 | 5.42E-02 | -0.18 | 3.69E-01 |
| AC114812.10    | -0.20 | 3.04E-01 | -0.18 | 3.70E-01 |
| AP1M2          | 0.22  | 2.59E-01 | 0.18  | 3.70E-01 |
| ATP6V1G1P4     | 0.00  | 9.92E-01 | -0.18 | 3.70E-01 |
| CCL7           | 0.16  | 4.24E-01 | 0.18  | 3.70E-01 |
| CRYM           | -0.23 | 2.35E-01 | -0.18 | 3.70E-01 |
| CTB-78O21.1    | -0.13 | 4.95E-01 | -0.18 | 3.70E-01 |
| CTD-3032J10.4  | -0.20 | 3.07E-01 | -0.18 | 3.70E-01 |
| FCRL6          | -0.05 | 7.82E-01 | -0.18 | 3.70E-01 |
| FHOD3          | -0.55 | 2.62E-03 | -0.18 | 3.70E-01 |
| ITGA11         | -0.19 | 3.36E-01 | 0.18  | 3.70E-01 |
| KLHL14         | -0.34 | 7.49E-02 | -0.18 | 3.70E-01 |
| KRT1           | -0.08 | 6.90E-01 | 0.18  | 3.70E-01 |
| KRTDAP         | 0.21  | 2.76E-01 | 0.18  | 3.70E-01 |
| MT-CO1         | 0.33  | 8.48E-02 | 0.18  | 3.70E-01 |
| PAIP2          | 0.00  | 9.91E-01 | 0.18  | 3.70E-01 |
| RP11-1149O23.2 | 0.25  | 1.93E-01 | -0.18 | 3.70E-01 |
| RP11-323I15.3  | -0.11 | 5.63E-01 | 0.18  | 3.70E-01 |
| RP11-757G1.6   | 0.10  | 5.95E-01 | -0.18 | 3.70E-01 |
| RPL35A         | 0.13  | 5.24E-01 | -0.18 | 3.70E-01 |
| TATDN2P1       | -0.01 | 9.44E-01 | -0.18 | 3.70E-01 |
| TM4SF18        | 0.04  | 8.57E-01 | 0.18  | 3.70E-01 |
| TRAV38-2DV8    | -0.17 | 3.82E-01 | 0.18  | 3.70E-01 |
| U82695.9       | -0.04 | 8.38E-01 | -0.18 | 3.70E-01 |
| UBE2Z          | 0.05  | 8.09E-01 | 0.18  | 3.70E-01 |
| VRK3           | -0.07 | 7.09E-01 | 0.18  | 3.70E-01 |
| ZNF598         | 0.31  | 1.05E-01 | 0.18  | 3.70E-01 |
| AC017006.2     | 0.11  | 5.85E-01 | 0.18  | 3.71E-01 |
| C15orf52       | -0.06 | 7.66E-01 | 0.18  | 3.71E-01 |
| CBX3P7         | -0.07 | 7.30E-01 | -0.18 | 3.71E-01 |
| CENPJ          | -0.06 | 7.73E-01 | -0.18 | 3.71E-01 |
| CTB-105N12.2   | 0.17  | 3.82E-01 | 0.18  | 3.71E-01 |
| CTD-2623N2.3   | 0.24  | 2.26E-01 | -0.18 | 3.71E-01 |
| FAM83C-AS1     | -0.16 | 4.20E-01 | -0.18 | 3.71E-01 |
| FER1L4         | -0.11 | 5.63E-01 | -0.18 | 3.71E-01 |
| GIT2           | 0.15  | 4.38E-01 | 0.18  | 3.71E-01 |
| HMGB1P8        | -0.10 | 6.09E-01 | -0.18 | 3.71E-01 |
| NONOP2         | 0.04  | 8.22E-01 | -0.18 | 3.71E-01 |
| NT5E           | -0.39 | 4.03E-02 | -0.18 | 3.71E-01 |
| PCDHB7         | 0.31  | 1.06E-01 | -0.18 | 3.71E-01 |
| RN7SKP71       | -0.06 | 7.60E-01 | 0.18  | 3.71E-01 |
| RP11-1094M14.8 | 0.05  | 8.13E-01 | 0.18  | 3.71E-01 |
| RP11-16C1.1    | -0.47 | 1.24E-02 | 0.18  | 3.71E-01 |
| RP4-756H11.5   | -0.27 | 1.66E-01 | -0.18 | 3.71E-01 |
| SAMSN1         | 0.14  | 4.63E-01 | 0.18  | 3.71E-01 |
| SETDB2         | -0.12 | 5.35E-01 | -0.18 | 3.71E-01 |

|                  |       |          |       |          |
|------------------|-------|----------|-------|----------|
| SHKBP1           | 0.15  | 4.38E-01 | 0.18  | 3.71E-01 |
| SLC35F4          | 0.07  | 7.25E-01 | -0.18 | 3.71E-01 |
| SMUG1            | 0.26  | 1.82E-01 | 0.18  | 3.71E-01 |
| SOST             | 0.50  | 7.07E-03 | 0.18  | 3.71E-01 |
| TMPRSS11F        | 0.11  | 5.71E-01 | -0.18 | 3.71E-01 |
| TTC14            | -0.24 | 2.14E-01 | -0.18 | 3.71E-01 |
| VIL1             | 0.06  | 7.49E-01 | -0.18 | 3.71E-01 |
| XLOC_000992      | -0.01 | 9.78E-01 | -0.18 | 3.71E-01 |
| KXbac-B444P24.14 | -0.01 | 9.70E-01 | -0.18 | 3.71E-01 |
| YRDCP1           | -0.21 | 2.78E-01 | 0.18  | 3.71E-01 |
| A2M              | -0.17 | 3.79E-01 | 0.18  | 3.72E-01 |
| A3GALT2          | -0.14 | 4.72E-01 | -0.18 | 3.72E-01 |
| AC079250.1       | -0.13 | 5.21E-01 | 0.18  | 3.72E-01 |
| AC083900.1       | -0.07 | 7.35E-01 | 0.18  | 3.72E-01 |
| AC096558.1       | -0.18 | 3.46E-01 | -0.18 | 3.72E-01 |
| CCDC24           | -0.19 | 3.33E-01 | -0.18 | 3.72E-01 |
| CDR2L            | -0.01 | 9.55E-01 | 0.18  | 3.72E-01 |
| CFAP73           | -0.09 | 6.36E-01 | -0.18 | 3.72E-01 |
| EGLN3P1          | -0.20 | 2.98E-01 | -0.18 | 3.72E-01 |
| FGR              | 0.23  | 2.47E-01 | 0.18  | 3.72E-01 |
| FOXC2            | -0.16 | 4.16E-01 | 0.18  | 3.72E-01 |
| GAPDHP33         | -0.20 | 3.10E-01 | -0.18 | 3.72E-01 |
| GSK3A            | 0.11  | 5.65E-01 | 0.18  | 3.72E-01 |
| IGLV5-52         | -0.24 | 2.26E-01 | -0.18 | 3.72E-01 |
| LIMCH1           | 0.07  | 7.24E-01 | 0.18  | 3.72E-01 |
| LMAN2L           | 0.04  | 8.21E-01 | 0.18  | 3.72E-01 |
| MEIS3            | -0.39 | 3.77E-02 | 0.18  | 3.72E-01 |
| MYO1D            | 0.10  | 6.15E-01 | 0.18  | 3.72E-01 |
| NUDT4            | 0.41  | 3.08E-02 | 0.18  | 3.72E-01 |
| PJA1             | 0.15  | 4.44E-01 | 0.18  | 3.72E-01 |
| POU2F2           | 0.10  | 6.18E-01 | 0.18  | 3.72E-01 |
| RAB20            | 0.03  | 8.99E-01 | 0.18  | 3.72E-01 |
| RNLS             | -0.06 | 7.69E-01 | -0.18 | 3.72E-01 |
| RP1-225E12.2     | -0.45 | 1.62E-02 | -0.18 | 3.72E-01 |
| RP11-210N13.1    | -0.06 | 7.64E-01 | -0.18 | 3.72E-01 |
| RP11-32P22.1     | 0.07  | 7.14E-01 | -0.18 | 3.72E-01 |
| RP11-358B23.1    | -0.43 | 2.14E-02 | 0.18  | 3.72E-01 |
| RP11-427P5.3     | 0.00  | 9.83E-01 | -0.18 | 3.72E-01 |
| RP11-540O11.7    | 0.08  | 6.82E-01 | 0.18  | 3.72E-01 |
| RP11-57H14.3     | -0.01 | 9.53E-01 | 0.18  | 3.72E-01 |
| RPS3AP35         | -0.08 | 6.79E-01 | -0.18 | 3.72E-01 |
| RPTOR            | -0.17 | 3.91E-01 | 0.18  | 3.72E-01 |
| SNORA11          | 0.00  | 9.93E-01 | 0.18  | 3.72E-01 |
| SPDEF            | -0.17 | 3.77E-01 | -0.18 | 3.72E-01 |
| WRNIP1           | 0.09  | 6.47E-01 | -0.18 | 3.72E-01 |
| XLOC_014386      | 0.01  | 9.49E-01 | -0.18 | 3.72E-01 |
| ARHGEF11         | 0.14  | 4.75E-01 | 0.18  | 3.73E-01 |

|                       |       |          |       |          |
|-----------------------|-------|----------|-------|----------|
| <b>CTC-336P14.1</b>   | -0.35 | 6.91E-02 | 0.18  | 3.73E-01 |
| <b>CTD-2619J13.14</b> | 0.00  | 9.92E-01 | 0.18  | 3.73E-01 |
| <b>ELN</b>            | -0.04 | 8.33E-01 | -0.18 | 3.73E-01 |
| <b>FAM90A1</b>        | -0.26 | 1.80E-01 | -0.18 | 3.73E-01 |
| <b>FOXI3</b>          | -0.28 | 1.46E-01 | 0.18  | 3.73E-01 |
| <b>KLK13</b>          | 0.01  | 9.47E-01 | 0.18  | 3.73E-01 |
| <b>LINC01013</b>      | 0.16  | 4.24E-01 | -0.18 | 3.73E-01 |
| <b>LINC01537</b>      | -0.08 | 6.76E-01 | 0.18  | 3.73E-01 |
| <b>MYBPC2</b>         | -0.04 | 8.35E-01 | 0.18  | 3.73E-01 |
| <b>PIK3CG</b>         | 0.18  | 3.66E-01 | 0.18  | 3.73E-01 |
| <b>POLR2K</b>         | -0.14 | 4.73E-01 | -0.18 | 3.73E-01 |
| <b>PTPN5</b>          | -0.17 | 4.01E-01 | 0.18  | 3.73E-01 |
| <b>RNU2-38P</b>       | -0.09 | 6.43E-01 | -0.18 | 3.73E-01 |
| <b>RP11-111K18.2</b>  | 0.18  | 3.55E-01 | -0.18 | 3.73E-01 |
| <b>RP11-333J10.2</b>  | -0.03 | 8.91E-01 | -0.18 | 3.73E-01 |
| <b>RP11-706O15.5</b>  | 0.29  | 1.33E-01 | -0.18 | 3.73E-01 |
| <b>RP11-884K10.7</b>  | 0.26  | 1.90E-01 | 0.18  | 3.73E-01 |
| <b>SMPD2</b>          | -0.13 | 5.04E-01 | 0.18  | 3.73E-01 |
| <b>TAS2R14</b>        | 0.32  | 1.02E-01 | -0.18 | 3.73E-01 |
| <b>AC003075.4</b>     | -0.09 | 6.48E-01 | -0.18 | 3.73E-01 |
| <b>AMMECR1</b>        | 0.25  | 2.09E-01 | 0.18  | 3.73E-01 |
| <b>BACH1-IT3</b>      | 0.00  | 9.85E-01 | -0.18 | 3.73E-01 |
| <b>C8orf4</b>         | -0.47 | 1.08E-02 | -0.18 | 3.73E-01 |
| <b>CHD7</b>           | 0.02  | 9.17E-01 | 0.18  | 3.73E-01 |
| <b>CYP51A1P2</b>      | 0.01  | 9.58E-01 | 0.18  | 3.73E-01 |
| <b>DSC3</b>           | 0.10  | 6.13E-01 | 0.18  | 3.73E-01 |
| <b>GOLT1A</b>         | 0.09  | 6.59E-01 | -0.18 | 3.73E-01 |
| <b>HIPK4</b>          | -0.01 | 9.59E-01 | 0.18  | 3.73E-01 |
| <b>IMPA2</b>          | 0.26  | 1.73E-01 | 0.18  | 3.73E-01 |
| <b>LDHAL6FP</b>       | -0.04 | 8.36E-01 | -0.18 | 3.73E-01 |
| <b>LINC01612</b>      | -0.20 | 3.05E-01 | -0.18 | 3.73E-01 |
| <b>MX2</b>            | 0.34  | 7.44E-02 | 0.18  | 3.73E-01 |
| <b>NFRKB</b>          | 0.29  | 1.40E-01 | 0.18  | 3.73E-01 |
| <b>PROCA1</b>         | -0.47 | 1.21E-02 | -0.18 | 3.73E-01 |
| <b>RMND1</b>          | -0.02 | 9.31E-01 | 0.18  | 3.73E-01 |
| <b>RNU6-137P</b>      | -0.13 | 4.98E-01 | -0.18 | 3.73E-01 |
| <b>RP11-295K2.3</b>   | 0.06  | 7.77E-01 | -0.18 | 3.73E-01 |
| <b>RP11-299J3.6</b>   | 0.11  | 5.64E-01 | -0.18 | 3.73E-01 |
| <b>RP11-31H5.2</b>    | -0.08 | 6.73E-01 | -0.18 | 3.73E-01 |
| <b>RP11-428J1.5</b>   | 0.08  | 6.91E-01 | 0.18  | 3.73E-01 |
| <b>RPSAP8</b>         | -0.26 | 1.78E-01 | 0.18  | 3.73E-01 |
| <b>RWDD1</b>          | -0.09 | 6.57E-01 | -0.18 | 3.73E-01 |
| <b>SFXN2</b>          | 0.36  | 5.96E-02 | 0.18  | 3.73E-01 |
| <b>AC017028.1</b>     | -0.10 | 6.25E-01 | 0.18  | 3.74E-01 |
| <b>AL121652.1</b>     | 0.15  | 4.59E-01 | -0.18 | 3.74E-01 |
| <b>ALDOA</b>          | 0.26  | 1.85E-01 | 0.18  | 3.74E-01 |
| <b>AP4E1</b>          | 0.14  | 4.76E-01 | 0.18  | 3.74E-01 |

|               |       |          |       |          |
|---------------|-------|----------|-------|----------|
| BBIP1         | -0.27 | 1.69E-01 | -0.18 | 3.74E-01 |
| BCKDHB        | -0.01 | 9.74E-01 | -0.18 | 3.74E-01 |
| CDCA8         | 0.23  | 2.43E-01 | 0.18  | 3.74E-01 |
| CLDN12        | 0.22  | 2.59E-01 | 0.18  | 3.74E-01 |
| CTA-280A3.2   | -0.20 | 3.11E-01 | -0.18 | 3.74E-01 |
| MED11         | 0.21  | 2.87E-01 | 0.18  | 3.74E-01 |
| NAV3          | 0.16  | 4.30E-01 | 0.18  | 3.74E-01 |
| PLEKHB2       | 0.15  | 4.54E-01 | -0.18 | 3.74E-01 |
| RNF166        | 0.02  | 9.22E-01 | 0.18  | 3.74E-01 |
| RP11-130L8.3  | 0.03  | 8.70E-01 | -0.18 | 3.74E-01 |
| RP11-282K24.3 | -0.05 | 8.00E-01 | -0.18 | 3.74E-01 |
| RP11-428P16.3 | -0.25 | 1.94E-01 | -0.18 | 3.74E-01 |
| RP11-490G8.1  | 0.34  | 7.89E-02 | -0.18 | 3.74E-01 |
| RP11-545E17.3 | -0.13 | 4.96E-01 | 0.18  | 3.74E-01 |
| TNKS2-AS1     | 0.08  | 6.95E-01 | -0.18 | 3.74E-01 |
| XLOC_007420   | -0.29 | 1.31E-01 | -0.18 | 3.74E-01 |
| ZBTB7A        | 0.06  | 7.64E-01 | 0.18  | 3.74E-01 |
| ZNF302        | -0.02 | 9.10E-01 | -0.18 | 3.74E-01 |
| AADAC         | -0.25 | 2.06E-01 | -0.18 | 3.75E-01 |
| AL669831.1    | -0.30 | 1.25E-01 | -0.18 | 3.75E-01 |
| CCAR2         | -0.06 | 7.47E-01 | 0.18  | 3.75E-01 |
| CCDC58        | 0.04  | 8.49E-01 | -0.18 | 3.75E-01 |
| CNOT6         | 0.03  | 8.83E-01 | 0.18  | 3.75E-01 |
| CTC-510F12.2  | 0.12  | 5.29E-01 | 0.18  | 3.75E-01 |
| CTD-2216M2.1  | -0.17 | 4.00E-01 | -0.18 | 3.75E-01 |
| CTD-2647E9.3  | -0.12 | 5.36E-01 | 0.18  | 3.75E-01 |
| ENPP7P10      | -0.33 | 8.24E-02 | -0.18 | 3.75E-01 |
| EQTN          | 0.05  | 7.95E-01 | -0.18 | 3.75E-01 |
| GNG12-AS1     | -0.24 | 2.11E-01 | -0.18 | 3.75E-01 |
| HRASLS        | -0.11 | 5.71E-01 | -0.18 | 3.75E-01 |
| KIAA0319      | -0.20 | 2.96E-01 | -0.18 | 3.75E-01 |
| MAD1L1        | 0.22  | 2.51E-01 | 0.18  | 3.75E-01 |
| MIR3175       | 0.04  | 8.36E-01 | -0.18 | 3.75E-01 |
| NRM           | -0.11 | 5.82E-01 | 0.18  | 3.75E-01 |
| OR5P4P        | 0.08  | 6.75E-01 | -0.18 | 3.75E-01 |
| RGS10         | 0.11  | 5.82E-01 | -0.18 | 3.75E-01 |
| RNU6-975P     | 0.06  | 7.58E-01 | -0.18 | 3.75E-01 |
| RNU6ATAC24P   | 0.03  | 8.98E-01 | 0.18  | 3.75E-01 |
| RP1-5O6.4     | -0.07 | 7.24E-01 | 0.18  | 3.75E-01 |
| RP11-354M1.2  | 0.41  | 3.03E-02 | 0.18  | 3.75E-01 |
| RP11-392O18.2 | 0.21  | 2.94E-01 | -0.18 | 3.75E-01 |
| RP11-403E24.1 | -0.16 | 4.08E-01 | -0.18 | 3.75E-01 |
| RP11-91J19.3  | 0.09  | 6.38E-01 | -0.18 | 3.75E-01 |
| SAP30L        | -0.25 | 2.07E-01 | -0.18 | 3.75E-01 |
| SCOC          | 0.15  | 4.49E-01 | -0.18 | 3.75E-01 |
| TMEM106A      | -0.29 | 1.34E-01 | 0.18  | 3.75E-01 |
| TOR3A         | 0.16  | 4.30E-01 | 0.18  | 3.75E-01 |

|               |       |          |       |          |
|---------------|-------|----------|-------|----------|
| ANKLE1        | 0.06  | 7.51E-01 | 0.18  | 3.76E-01 |
| CTD-2020K17.3 | -0.15 | 4.31E-01 | 0.18  | 3.76E-01 |
| DNAJB6        | 0.23  | 2.43E-01 | 0.18  | 3.76E-01 |
| IGHMBP2       | -0.10 | 6.30E-01 | 0.18  | 3.76E-01 |
| KRBA1         | 0.20  | 3.11E-01 | 0.18  | 3.76E-01 |
| KRT84         | 0.18  | 3.66E-01 | 0.18  | 3.76E-01 |
| MAPKAPK2      | 0.26  | 1.89E-01 | 0.18  | 3.76E-01 |
| POLE4         | 0.19  | 3.41E-01 | 0.18  | 3.76E-01 |
| PSME2         | 0.13  | 4.95E-01 | 0.18  | 3.76E-01 |
| RP11-14I17.2  | -0.09 | 6.64E-01 | 0.18  | 3.76E-01 |
| ST8SIA4       | 0.08  | 6.97E-01 | 0.18  | 3.76E-01 |
| CCDC50        | -0.19 | 3.37E-01 | -0.18 | 3.76E-01 |
| CH17-431G21.1 | -0.04 | 8.40E-01 | -0.18 | 3.76E-01 |
| CTD-2116N17.1 | 0.00  | 9.82E-01 | -0.18 | 3.76E-01 |
| CYP2C9        | -0.05 | 8.14E-01 | -0.18 | 3.76E-01 |
| FAM133CP      | -0.27 | 1.61E-01 | -0.18 | 3.76E-01 |
| GRK7          | -0.09 | 6.49E-01 | -0.18 | 3.76E-01 |
| LATS2         | -0.44 | 2.05E-02 | -0.18 | 3.76E-01 |
| MANEA         | -0.01 | 9.58E-01 | -0.18 | 3.76E-01 |
| NUP155        | 0.09  | 6.64E-01 | -0.18 | 3.76E-01 |
| PCDHGA7       | -0.36 | 6.28E-02 | -0.18 | 3.76E-01 |
| PDE6G         | 0.08  | 7.03E-01 | -0.18 | 3.76E-01 |
| RP11-109N23.5 | 0.29  | 1.32E-01 | -0.18 | 3.76E-01 |
| RP11-49I11.1  | 0.14  | 4.66E-01 | -0.18 | 3.76E-01 |
| RP11-515O17.3 | -0.11 | 5.91E-01 | -0.18 | 3.76E-01 |
| RP11-56M3.1   | -0.03 | 8.99E-01 | -0.18 | 3.76E-01 |
| RP11-888D10.4 | -0.36 | 5.68E-02 | -0.18 | 3.76E-01 |
| SNHG22        | 0.04  | 8.21E-01 | -0.18 | 3.76E-01 |
| UBE2Q2L       | -0.24 | 2.09E-01 | -0.18 | 3.76E-01 |
| Z73979.1      | -0.21 | 2.91E-01 | -0.18 | 3.76E-01 |
| AC092652.1    | -0.06 | 7.77E-01 | -0.18 | 3.77E-01 |
| AL161450.1    | -0.39 | 4.25E-02 | 0.18  | 3.77E-01 |
| ALG1L12P      | 0.02  | 9.33E-01 | -0.18 | 3.77E-01 |
| CCDC57        | -0.25 | 2.02E-01 | -0.18 | 3.77E-01 |
| CDC42EP4      | 0.06  | 7.66E-01 | 0.18  | 3.77E-01 |
| DNAAF1        | -0.12 | 5.57E-01 | -0.18 | 3.77E-01 |
| ERVK3-1       | -0.11 | 5.89E-01 | -0.18 | 3.77E-01 |
| FAM214A       | 0.35  | 7.20E-02 | 0.18  | 3.77E-01 |
| FAM45A        | 0.22  | 2.56E-01 | 0.18  | 3.77E-01 |
| GP6           | -0.33 | 8.59E-02 | -0.18 | 3.77E-01 |
| GTF2I         | 0.14  | 4.64E-01 | 0.18  | 3.77E-01 |
| HMGB3P32      | -0.17 | 3.84E-01 | 0.18  | 3.77E-01 |
| HOOK3         | -0.01 | 9.69E-01 | -0.18 | 3.77E-01 |
| IKBKB         | -0.03 | 8.79E-01 | 0.18  | 3.77E-01 |
| MRPL53        | 0.17  | 3.85E-01 | 0.18  | 3.77E-01 |
| NOA1          | 0.13  | 5.20E-01 | 0.18  | 3.77E-01 |
| PMS2P4        | 0.10  | 6.24E-01 | -0.18 | 3.77E-01 |

|               |       |          |       |          |
|---------------|-------|----------|-------|----------|
| PRRT3         | -0.02 | 9.24E-01 | -0.18 | 3.77E-01 |
| PSD           | -0.20 | 3.02E-01 | 0.18  | 3.77E-01 |
| RCAN2         | -0.54 | 2.77E-03 | -0.18 | 3.77E-01 |
| RNU6-128P     | -0.13 | 5.14E-01 | -0.18 | 3.77E-01 |
| RP11-2H3.6    | -0.06 | 7.66E-01 | -0.18 | 3.77E-01 |
| RP11-352M15.1 | -0.29 | 1.35E-01 | -0.18 | 3.77E-01 |
| RP11-367G18.2 | 0.39  | 3.82E-02 | 0.18  | 3.77E-01 |
| RP11-3D4.3    | -0.47 | 1.14E-02 | -0.18 | 3.77E-01 |
| RP11-45M22.2  | -0.17 | 3.74E-01 | -0.18 | 3.77E-01 |
| SERPING1      | -0.16 | 4.25E-01 | 0.18  | 3.77E-01 |
| ARSH          | 0.07  | 7.06E-01 | 0.18  | 3.78E-01 |
| CCDC69        | 0.51  | 5.65E-03 | 0.18  | 3.78E-01 |
| CCNO          | 0.21  | 2.95E-01 | 0.18  | 3.78E-01 |
| CRMP1         | -0.17 | 3.96E-01 | 0.18  | 3.78E-01 |
| ETV3          | 0.05  | 8.02E-01 | 0.18  | 3.78E-01 |
| FLVCR1-AS1    | -0.17 | 3.96E-01 | 0.18  | 3.78E-01 |
| G20695        | 0.12  | 5.40E-01 | 0.18  | 3.78E-01 |
| HIF1AN        | -0.30 | 1.27E-01 | 0.18  | 3.78E-01 |
| IGHE          | -0.20 | 3.02E-01 | 0.18  | 3.78E-01 |
| KRT18P62      | 0.05  | 7.97E-01 | 0.18  | 3.78E-01 |
| PRSS3         | 0.32  | 9.90E-02 | 0.18  | 3.78E-01 |
| RHBDF1        | 0.07  | 7.33E-01 | 0.18  | 3.78E-01 |
| SNRPGP5       | 0.20  | 2.98E-01 | 0.18  | 3.78E-01 |
| WBP5          | 0.09  | 6.57E-01 | 0.18  | 3.78E-01 |
| AC118754.4    | 0.21  | 2.83E-01 | -0.18 | 3.78E-01 |
| B4GALNT1      | 0.11  | 5.85E-01 | -0.18 | 3.78E-01 |
| JADE1         | -0.10 | 6.16E-01 | -0.18 | 3.78E-01 |
| LINC00462     | 0.16  | 4.04E-01 | -0.18 | 3.78E-01 |
| MIR5692A1     | 0.10  | 6.26E-01 | -0.18 | 3.78E-01 |
| NIP7P3        | -0.17 | 4.01E-01 | -0.18 | 3.78E-01 |
| PPFIA3        | -0.07 | 7.41E-01 | -0.18 | 3.78E-01 |
| RLIMP1        | -0.11 | 5.86E-01 | -0.18 | 3.78E-01 |
| RP11-194N12.2 | -0.15 | 4.39E-01 | -0.18 | 3.78E-01 |
| SP1           | -0.16 | 4.11E-01 | -0.18 | 3.78E-01 |
| TSNAX         | 0.31  | 1.07E-01 | -0.18 | 3.78E-01 |
| ZNF577        | -0.09 | 6.53E-01 | -0.18 | 3.78E-01 |
| AC139887.4    | 0.14  | 4.92E-01 | -0.18 | 3.78E-01 |
| AP000438.2    | -0.13 | 5.17E-01 | -0.18 | 3.78E-01 |
| APOBEC3H      | -0.11 | 5.81E-01 | 0.18  | 3.78E-01 |
| C5orf45       | -0.31 | 1.13E-01 | -0.18 | 3.78E-01 |
| CTD-2007L18.5 | 0.09  | 6.39E-01 | -0.18 | 3.78E-01 |
| DEFB103A      | 0.14  | 4.72E-01 | 0.18  | 3.78E-01 |
| GPC1          | 0.03  | 8.94E-01 | -0.18 | 3.78E-01 |
| LARP7         | 0.14  | 4.63E-01 | -0.18 | 3.78E-01 |
| MIR133A1HG    | -0.07 | 7.21E-01 | -0.18 | 3.78E-01 |
| MOV10L1       | -0.20 | 3.00E-01 | -0.18 | 3.78E-01 |
| NT5M          | 0.25  | 2.01E-01 | -0.18 | 3.78E-01 |



|                      |       |          |       |          |
|----------------------|-------|----------|-------|----------|
| <b>RN7SL555P</b>     | -0.03 | 8.95E-01 | -0.18 | 3.78E-01 |
| <b>RP1-101D8.1</b>   | -0.18 | 3.52E-01 | 0.18  | 3.78E-01 |
| <b>RP11-46H11.11</b> | -0.29 | 1.31E-01 | -0.18 | 3.78E-01 |
| <b>SPRED1</b>        | 0.09  | 6.38E-01 | -0.18 | 3.78E-01 |
| <b>TPM2</b>          | 0.07  | 7.23E-01 | 0.18  | 3.78E-01 |
| <b>TTLL11</b>        | -0.09 | 6.43E-01 | -0.18 | 3.78E-01 |
| <b>UGGT2</b>         | -0.17 | 3.90E-01 | -0.18 | 3.78E-01 |
| <b>ZBED5</b>         | -0.06 | 7.80E-01 | -0.18 | 3.78E-01 |
| <b>AC010900.2</b>    | -0.22 | 2.57E-01 | 0.18  | 3.79E-01 |
| <b>AL139318.1</b>    | -0.05 | 7.85E-01 | 0.18  | 3.79E-01 |
| <b>BTD</b>           | 0.03  | 8.92E-01 | 0.18  | 3.79E-01 |
| <b>CXCR6</b>         | 0.07  | 7.39E-01 | 0.18  | 3.79E-01 |
| <b>FAM98A</b>        | 0.06  | 7.43E-01 | 0.18  | 3.79E-01 |
| <b>MRPS27</b>        | 0.10  | 6.09E-01 | 0.18  | 3.79E-01 |
| <b>SEC13P1</b>       | -0.10 | 6.08E-01 | 0.18  | 3.79E-01 |
| <b>AP001625.6</b>    | 0.03  | 8.87E-01 | -0.18 | 3.79E-01 |
| <b>BCCIP</b>         | 0.05  | 7.99E-01 | -0.18 | 3.79E-01 |
| <b>BMS1P7</b>        | 0.08  | 6.80E-01 | -0.18 | 3.79E-01 |
| <b>CFAP44</b>        | 0.05  | 8.19E-01 | -0.18 | 3.79E-01 |
| <b>FGF14-AS1</b>     | 0.24  | 2.20E-01 | -0.18 | 3.79E-01 |
| <b>G30412</b>        | -0.14 | 4.85E-01 | -0.18 | 3.79E-01 |
| <b>HSPA13</b>        | 0.04  | 8.48E-01 | -0.18 | 3.79E-01 |
| <b>IGBP1-AS1</b>     | -0.03 | 8.98E-01 | -0.18 | 3.79E-01 |
| <b>MRPS35</b>        | 0.01  | 9.66E-01 | -0.18 | 3.79E-01 |
| <b>RP11-197M22.2</b> | -0.32 | 1.01E-01 | -0.18 | 3.79E-01 |
| <b>RP11-286E11.1</b> | 0.01  | 9.71E-01 | -0.18 | 3.79E-01 |
| <b>RP11-714G18.1</b> | -0.29 | 1.32E-01 | -0.18 | 3.79E-01 |
| <b>RP11-791G15.2</b> | -0.21 | 2.91E-01 | -0.18 | 3.79E-01 |
| <b>SLC8A1-AS1</b>    | -0.11 | 5.92E-01 | -0.18 | 3.79E-01 |
| <b>SNORD116-15</b>   | 0.12  | 5.48E-01 | -0.18 | 3.79E-01 |
| <b>SPIDR</b>         | 0.12  | 5.52E-01 | -0.18 | 3.79E-01 |
| <b>ZNF326</b>        | -0.03 | 8.81E-01 | -0.18 | 3.79E-01 |
| <b>AC007557.3</b>    | -0.26 | 1.87E-01 | -0.18 | 3.80E-01 |
| <b>AC009061.1</b>    | 0.07  | 7.25E-01 | -0.18 | 3.80E-01 |
| <b>AL050321.1</b>    | 0.21  | 2.75E-01 | -0.18 | 3.80E-01 |
| <b>ARHGAP19</b>      | 0.02  | 9.24E-01 | -0.18 | 3.80E-01 |
| <b>CKS1B</b>         | -0.05 | 8.03E-01 | -0.18 | 3.80E-01 |
| <b>CPNE9</b>         | -0.11 | 5.67E-01 | -0.18 | 3.80E-01 |
| <b>MIR193A</b>       | 0.20  | 3.09E-01 | -0.18 | 3.80E-01 |
| <b>RAI2</b>          | -0.38 | 4.56E-02 | -0.18 | 3.80E-01 |
| <b>RIMKLBP1</b>      | -0.16 | 4.07E-01 | -0.18 | 3.80E-01 |
| <b>RNGTTP1</b>       | -0.10 | 6.06E-01 | -0.18 | 3.80E-01 |
| <b>RP11-707G18.1</b> | -0.23 | 2.29E-01 | -0.18 | 3.80E-01 |
| <b>THAP9</b>         | 0.11  | 5.61E-01 | -0.18 | 3.80E-01 |
| <b>AKR7A2</b>        | -0.10 | 6.25E-01 | 0.18  | 3.80E-01 |
| <b>AQP1</b>          | -0.24 | 2.14E-01 | 0.18  | 3.80E-01 |
| <b>DCAF5</b>         | -0.30 | 1.24E-01 | 0.18  | 3.80E-01 |

|                |       |          |       |          |
|----------------|-------|----------|-------|----------|
| FAM155B        | -0.21 | 2.75E-01 | 0.18  | 3.80E-01 |
| GUSBP1         | -0.05 | 7.92E-01 | 0.18  | 3.80E-01 |
| LINC01395      | 0.19  | 3.28E-01 | 0.18  | 3.80E-01 |
| LMX1A          | -0.15 | 4.34E-01 | 0.18  | 3.80E-01 |
| NLRP7          | 0.12  | 5.52E-01 | 0.18  | 3.80E-01 |
| NOSIP          | 0.17  | 3.86E-01 | 0.18  | 3.80E-01 |
| RP11-91H12.4   | 0.01  | 9.66E-01 | 0.18  | 3.80E-01 |
| TSPEAR         | -0.09 | 6.34E-01 | 0.18  | 3.80E-01 |
| ZAP70          | 0.10  | 6.22E-01 | 0.18  | 3.80E-01 |
| AC007285.6     | 0.02  | 9.13E-01 | 0.18  | 3.81E-01 |
| AC011294.3     | 0.03  | 8.98E-01 | 0.18  | 3.81E-01 |
| AP000908.1     | 0.02  | 9.12E-01 | -0.18 | 3.81E-01 |
| CFDP1          | -0.16 | 4.04E-01 | -0.18 | 3.81E-01 |
| COBLL1         | 0.26  | 1.79E-01 | -0.18 | 3.81E-01 |
| FGFBP1         | 0.13  | 5.00E-01 | -0.18 | 3.81E-01 |
| GNPAT          | -0.08 | 6.68E-01 | -0.18 | 3.81E-01 |
| GOLGA8VP       | 0.12  | 5.34E-01 | 0.18  | 3.81E-01 |
| GOLPH3L        | 0.36  | 6.26E-02 | 0.18  | 3.81E-01 |
| HDHD3          | 0.04  | 8.32E-01 | 0.18  | 3.81E-01 |
| HERC2P4        | -0.04 | 8.40E-01 | 0.18  | 3.81E-01 |
| IL12B          | 0.22  | 2.53E-01 | 0.18  | 3.81E-01 |
| LRRC18         | -0.43 | 2.26E-02 | 0.18  | 3.81E-01 |
| NUP188         | -0.01 | 9.57E-01 | 0.18  | 3.81E-01 |
| OR13D3P        | -0.02 | 9.03E-01 | -0.18 | 3.81E-01 |
| POLR2J2        | 0.18  | 3.48E-01 | 0.18  | 3.81E-01 |
| PRB3           | 0.13  | 5.19E-01 | -0.18 | 3.81E-01 |
| RP11-195F19.30 | 0.00  | 9.99E-01 | -0.18 | 3.81E-01 |
| RP11-305K5.1   | -0.05 | 8.05E-01 | -0.18 | 3.81E-01 |
| RP11-474D14.2  | 0.01  | 9.69E-01 | -0.18 | 3.81E-01 |
| RP11-589B3.6   | 0.26  | 1.87E-01 | -0.18 | 3.81E-01 |
| SFMBT1         | 0.00  | 9.90E-01 | -0.18 | 3.81E-01 |
| TAF6L          | -0.10 | 6.30E-01 | 0.18  | 3.81E-01 |
| TPO            | 0.10  | 6.30E-01 | 0.18  | 3.81E-01 |
| TSGA10         | -0.05 | 8.16E-01 | -0.18 | 3.81E-01 |
| AC114494.1     | -0.32 | 9.74E-02 | 0.18  | 3.82E-01 |
| ADAMTS16       | -0.17 | 4.01E-01 | 0.18  | 3.82E-01 |
| BISPR          | 0.12  | 5.35E-01 | 0.18  | 3.82E-01 |
| CALU           | -0.14 | 4.83E-01 | -0.18 | 3.82E-01 |
| CTC-550B14.7   | -0.11 | 5.70E-01 | -0.18 | 3.82E-01 |
| CTD-2525I3.5   | -0.16 | 4.11E-01 | -0.18 | 3.82E-01 |
| FMNL2          | 0.14  | 4.87E-01 | 0.18  | 3.82E-01 |
| G264           | -0.04 | 8.55E-01 | -0.18 | 3.82E-01 |
| HCFC1          | 0.08  | 6.73E-01 | 0.18  | 3.82E-01 |
| LRRC37A17P     | -0.17 | 3.90E-01 | -0.18 | 3.82E-01 |
| LYRM5          | -0.03 | 8.85E-01 | 0.18  | 3.82E-01 |
| MPP6           | 0.01  | 9.71E-01 | -0.18 | 3.82E-01 |
| PLIN3          | 0.05  | 7.95E-01 | 0.18  | 3.82E-01 |

|               |       |          |       |          |
|---------------|-------|----------|-------|----------|
| RP1-241P17.4  | -0.11 | 5.83E-01 | -0.18 | 3.82E-01 |
| RP11-138H8.2  | -0.17 | 3.83E-01 | -0.18 | 3.82E-01 |
| RP11-367O10.1 | -0.34 | 7.89E-02 | -0.18 | 3.82E-01 |
| RP11-48G14.3  | -0.21 | 2.72E-01 | 0.18  | 3.82E-01 |
| RP11-630A13.4 | -0.43 | 2.16E-02 | -0.18 | 3.82E-01 |
| RP11-654A16.1 | -0.30 | 1.15E-01 | 0.18  | 3.82E-01 |
| RPL21P136     | -0.08 | 6.94E-01 | 0.18  | 3.82E-01 |
| SLCO4C1       | 0.15  | 4.34E-01 | -0.18 | 3.82E-01 |
| SNAI1         | 0.01  | 9.74E-01 | 0.18  | 3.82E-01 |
| AC007875.2    | 0.12  | 5.38E-01 | -0.18 | 3.83E-01 |
| AC144530.1    | 0.19  | 3.24E-01 | -0.18 | 3.83E-01 |
| ATP6V1G2      | 0.33  | 8.87E-02 | -0.18 | 3.83E-01 |
| ATXN7L1       | -0.16 | 4.20E-01 | 0.18  | 3.83E-01 |
| BEND5         | -0.01 | 9.59E-01 | 0.18  | 3.83E-01 |
| CTD-2281E23.1 | -0.30 | 1.17E-01 | 0.18  | 3.83E-01 |
| FCER1G        | 0.12  | 5.53E-01 | 0.18  | 3.83E-01 |
| GNL2P1        | -0.07 | 7.40E-01 | -0.18 | 3.83E-01 |
| HMGB3P9       | 0.14  | 4.69E-01 | -0.18 | 3.83E-01 |
| HSD17B1       | 0.19  | 3.21E-01 | 0.18  | 3.83E-01 |
| IL10RB        | 0.14  | 4.66E-01 | 0.18  | 3.83E-01 |
| LINC01301     | -0.11 | 5.87E-01 | -0.18 | 3.83E-01 |
| LINC01497     | 0.03  | 8.74E-01 | 0.18  | 3.83E-01 |
| MOGAT1        | 0.19  | 3.23E-01 | -0.18 | 3.83E-01 |
| NBPF12        | -0.07 | 7.14E-01 | -0.18 | 3.83E-01 |
| NUPR1         | 0.01  | 9.49E-01 | 0.18  | 3.83E-01 |
| PRMT6         | 0.28  | 1.47E-01 | -0.18 | 3.83E-01 |
| PTK2B         | 0.37  | 5.46E-02 | -0.18 | 3.83E-01 |
| RP11-467H10.1 | -0.52 | 4.75E-03 | -0.18 | 3.83E-01 |
| RP11-494O16.4 | -0.08 | 6.83E-01 | -0.18 | 3.83E-01 |
| TMEM88B       | -0.17 | 3.81E-01 | -0.18 | 3.83E-01 |
| TRIL          | 0.17  | 3.75E-01 | -0.18 | 3.83E-01 |
| XLOC_010389   | -0.01 | 9.51E-01 | 0.18  | 3.83E-01 |
| ASB9          | -0.38 | 4.54E-02 | -0.17 | 3.83E-01 |
| BRD9          | 0.05  | 8.01E-01 | -0.17 | 3.83E-01 |
| FCAR          | 0.02  | 9.11E-01 | -0.17 | 3.83E-01 |
| G25345        | -0.09 | 6.64E-01 | -0.17 | 3.83E-01 |
| LINC01001     | 0.21  | 2.82E-01 | -0.17 | 3.83E-01 |
| MZT1          | 0.18  | 3.59E-01 | -0.17 | 3.83E-01 |
| RP11-74E22.6  | -0.21 | 2.82E-01 | -0.17 | 3.83E-01 |
| RP11-983P16.4 | 0.18  | 3.49E-01 | -0.17 | 3.83E-01 |
| ST6GAL2       | 0.03  | 8.92E-01 | -0.17 | 3.83E-01 |
| ZNF44         | -0.27 | 1.58E-01 | -0.17 | 3.83E-01 |
| ARHGEF19      | 0.39  | 4.21E-02 | 0.17  | 3.83E-01 |
| GPSM3         | -0.01 | 9.66E-01 | 0.17  | 3.83E-01 |
| MT-TP         | 0.19  | 3.34E-01 | 0.17  | 3.83E-01 |
| PEG13         | 0.26  | 1.82E-01 | 0.17  | 3.83E-01 |
| RIOK3         | 0.09  | 6.64E-01 | 0.17  | 3.83E-01 |

|                  |       |          |       |          |
|------------------|-------|----------|-------|----------|
| RP11-264J4.8     | 0.34  | 7.84E-02 | 0.17  | 3.83E-01 |
| RP11-499E18.1    | -0.08 | 7.02E-01 | 0.17  | 3.83E-01 |
| RP11-554A11.9    | 0.08  | 7.03E-01 | 0.17  | 3.83E-01 |
| RPL6P27          | 0.00  | 9.96E-01 | 0.17  | 3.83E-01 |
| RPS5P2           | -0.28 | 1.42E-01 | 0.17  | 3.83E-01 |
| SCG2             | 0.00  | 9.90E-01 | 0.17  | 3.83E-01 |
| XKR5             | 0.38  | 4.42E-02 | 0.17  | 3.83E-01 |
| AL136419.6       | -0.04 | 8.58E-01 | -0.17 | 3.84E-01 |
| ANKRD33B-AS1     | -0.33 | 8.59E-02 | -0.17 | 3.84E-01 |
| ANKRD61          | -0.39 | 4.18E-02 | -0.17 | 3.84E-01 |
| ARAP2            | -0.12 | 5.41E-01 | 0.17  | 3.84E-01 |
| ATF1             | 0.19  | 3.22E-01 | -0.17 | 3.84E-01 |
| CNTROB           | -0.03 | 8.79E-01 | 0.17  | 3.84E-01 |
| CTB-51J22.1      | -0.28 | 1.51E-01 | -0.17 | 3.84E-01 |
| CTD-2340D6.2     | -0.32 | 9.90E-02 | 0.17  | 3.84E-01 |
| FBXW11           | 0.33  | 9.07E-02 | 0.17  | 3.84E-01 |
| G18713           | 0.34  | 7.61E-02 | 0.17  | 3.84E-01 |
| G35130           | 0.16  | 4.04E-01 | -0.17 | 3.84E-01 |
| G41741           | -0.14 | 4.88E-01 | 0.17  | 3.84E-01 |
| KRT8P15          | -0.16 | 4.25E-01 | -0.17 | 3.84E-01 |
| LGI1             | -0.22 | 2.55E-01 | -0.17 | 3.84E-01 |
| LLOXNC01-116E7.2 | -0.24 | 2.13E-01 | -0.17 | 3.84E-01 |
| PTDSS2           | -0.22 | 2.53E-01 | 0.17  | 3.84E-01 |
| QRSL1P3          | -0.16 | 4.29E-01 | -0.17 | 3.84E-01 |
| RAC1P2           | -0.17 | 3.94E-01 | 0.17  | 3.84E-01 |
| RP1-193H18.2     | 0.00  | 1.00E+00 | 0.17  | 3.84E-01 |
| RP11-1250I15.3   | 0.16  | 4.15E-01 | -0.17 | 3.84E-01 |
| RP11-178C3.6     | -0.16 | 4.24E-01 | -0.17 | 3.84E-01 |
| RP11-242P2.1     | -0.12 | 5.38E-01 | -0.17 | 3.84E-01 |
| RP11-375H19.2    | -0.04 | 8.39E-01 | -0.17 | 3.84E-01 |
| RP11-809N8.6     | -0.17 | 3.74E-01 | 0.17  | 3.84E-01 |
| RPL9P30          | 0.05  | 7.95E-01 | -0.17 | 3.84E-01 |
| SLC25A27         | -0.22 | 2.62E-01 | -0.17 | 3.84E-01 |
| TAS2R13          | 0.19  | 3.26E-01 | -0.17 | 3.84E-01 |
| TOB1             | 0.04  | 8.44E-01 | 0.17  | 3.84E-01 |
| XLOC_012707      | -0.19 | 3.23E-01 | -0.17 | 3.84E-01 |
| ZNF493           | -0.04 | 8.24E-01 | -0.17 | 3.84E-01 |
| AKR1C3           | 0.01  | 9.57E-01 | -0.17 | 3.85E-01 |
| AL353791.1       | -0.21 | 2.78E-01 | 0.17  | 3.85E-01 |
| ALPK3            | -0.15 | 4.44E-01 | 0.17  | 3.85E-01 |
| AP000476.1       | 0.26  | 1.76E-01 | 0.17  | 3.85E-01 |
| BARHL1           | -0.10 | 6.02E-01 | 0.17  | 3.85E-01 |
| BBS1             | 0.17  | 3.79E-01 | -0.17 | 3.85E-01 |
| BCL2L14          | 0.32  | 9.33E-02 | 0.17  | 3.85E-01 |
| C10orf12         | 0.06  | 7.76E-01 | -0.17 | 3.85E-01 |
| CSTB             | 0.19  | 3.45E-01 | 0.17  | 3.85E-01 |
| CYP2D7           | -0.03 | 8.89E-01 | -0.17 | 3.85E-01 |

|               |       |          |       |          |
|---------------|-------|----------|-------|----------|
| GLRX2         | 0.08  | 6.70E-01 | -0.17 | 3.85E-01 |
| KLHL18        | 0.32  | 1.01E-01 | 0.17  | 3.85E-01 |
| LONP1         | 0.16  | 4.10E-01 | 0.17  | 3.85E-01 |
| LRRN1         | -0.36 | 6.01E-02 | -0.17 | 3.85E-01 |
| MTND2P11      | -0.32 | 9.50E-02 | -0.17 | 3.85E-01 |
| NEDD1         | 0.00  | 9.89E-01 | -0.17 | 3.85E-01 |
| OLIG3         | -0.21 | 2.95E-01 | -0.17 | 3.85E-01 |
| PCDH10        | -0.11 | 5.76E-01 | -0.17 | 3.85E-01 |
| PEF1          | 0.37  | 5.56E-02 | 0.17  | 3.85E-01 |
| PHPT1         | -0.18 | 3.53E-01 | 0.17  | 3.85E-01 |
| PLCB3         | 0.11  | 5.89E-01 | 0.17  | 3.85E-01 |
| RASGRP1       | 0.08  | 6.79E-01 | 0.17  | 3.85E-01 |
| RN7SL2        | 0.05  | 8.00E-01 | 0.17  | 3.85E-01 |
| RNU6-1147P    | -0.23 | 2.37E-01 | -0.17 | 3.85E-01 |
| RP1-122P22.4  | 0.04  | 8.30E-01 | 0.17  | 3.85E-01 |
| RP11-327F22.4 | 0.10  | 6.19E-01 | 0.17  | 3.85E-01 |
| RP11-37L2.1   | -0.20 | 3.00E-01 | -0.17 | 3.85E-01 |
| RP11-380J14.1 | -0.08 | 6.77E-01 | 0.17  | 3.85E-01 |
| RP11-434P11.2 | -0.22 | 2.64E-01 | -0.17 | 3.85E-01 |
| RP11-481J13.1 | -0.05 | 8.10E-01 | 0.17  | 3.85E-01 |
| RP11-513G19.1 | -0.28 | 1.43E-01 | -0.17 | 3.85E-01 |
| RP11-6E9.4    | -0.16 | 4.29E-01 | 0.17  | 3.85E-01 |
| RP11-804H8.6  | -0.22 | 2.64E-01 | -0.17 | 3.85E-01 |
| RP11-886P16.6 | 0.05  | 7.84E-01 | 0.17  | 3.85E-01 |
| RPL23AP32     | -0.14 | 4.78E-01 | -0.17 | 3.85E-01 |
| RPS15AP24     | 0.10  | 6.31E-01 | 0.17  | 3.85E-01 |
| TAF1A         | 0.02  | 9.10E-01 | -0.17 | 3.85E-01 |
| TMEM126A      | 0.17  | 3.80E-01 | -0.17 | 3.85E-01 |
| XLOC_008033   | -0.04 | 8.41E-01 | -0.17 | 3.85E-01 |
| ANXA2P1       | -0.17 | 3.91E-01 | -0.17 | 3.86E-01 |
| ATOX1         | 0.27  | 1.60E-01 | 0.17  | 3.86E-01 |
| ATP4A         | 0.16  | 4.13E-01 | -0.17 | 3.86E-01 |
| ATP6AP1       | 0.29  | 1.34E-01 | 0.17  | 3.86E-01 |
| B3GALT5       | -0.39 | 3.85E-02 | -0.17 | 3.86E-01 |
| CHD1L         | 0.19  | 3.30E-01 | -0.17 | 3.86E-01 |
| CTA-113A6.1   | -0.06 | 7.51E-01 | 0.17  | 3.86E-01 |
| DYNLL1        | -0.06 | 7.77E-01 | 0.17  | 3.86E-01 |
| FHL1          | -0.40 | 3.67E-02 | -0.17 | 3.86E-01 |
| G26894        | -0.12 | 5.55E-01 | 0.17  | 3.86E-01 |
| GIPR          | -0.15 | 4.51E-01 | 0.17  | 3.86E-01 |
| HAGLR         | -0.30 | 1.19E-01 | 0.17  | 3.86E-01 |
| HDAC3         | 0.04  | 8.25E-01 | 0.17  | 3.86E-01 |
| HNRNPLL       | -0.01 | 9.64E-01 | -0.17 | 3.86E-01 |
| IL17REL       | -0.33 | 8.53E-02 | 0.17  | 3.86E-01 |
| LINC01287     | -0.23 | 2.35E-01 | -0.17 | 3.86E-01 |
| LINC01504     | 0.05  | 7.96E-01 | 0.17  | 3.86E-01 |
| NPTN          | 0.00  | 9.85E-01 | -0.17 | 3.86E-01 |

|                      |       |          |       |          |
|----------------------|-------|----------|-------|----------|
| <b>OR7E128P</b>      | 0.07  | 7.16E-01 | 0.17  | 3.86E-01 |
| <b>RP1-267L14.6</b>  | -0.48 | 8.97E-03 | -0.17 | 3.86E-01 |
| <b>RP11-60A8.1</b>   | -0.13 | 5.10E-01 | -0.17 | 3.86E-01 |
| <b>RP11-673C5.1</b>  | -0.08 | 6.93E-01 | -0.17 | 3.86E-01 |
| <b>RPS16P5</b>       | -0.09 | 6.48E-01 | 0.17  | 3.86E-01 |
| <b>SAR1B</b>         | 0.01  | 9.46E-01 | -0.17 | 3.86E-01 |
| <b>TF</b>            | 0.40  | 3.75E-02 | -0.17 | 3.86E-01 |
| <b>ZNF572</b>        | -0.02 | 9.00E-01 | -0.17 | 3.86E-01 |
| <b>ACE2</b>          | 0.26  | 1.86E-01 | 0.17  | 3.87E-01 |
| <b>ATAD1</b>         | 0.15  | 4.49E-01 | -0.17 | 3.87E-01 |
| <b>B3GNT3</b>        | 0.02  | 9.33E-01 | 0.17  | 3.87E-01 |
| <b>CTB-60B18.12</b>  | -0.06 | 7.52E-01 | -0.17 | 3.87E-01 |
| <b>KRT27</b>         | -0.07 | 7.33E-01 | 0.17  | 3.87E-01 |
| <b>PI4KB</b>         | 0.47  | 1.19E-02 | 0.17  | 3.87E-01 |
| <b>RP11-230C9.4</b>  | -0.11 | 5.92E-01 | 0.17  | 3.87E-01 |
| <b>RP11-354P11.8</b> | 0.20  | 3.11E-01 | -0.17 | 3.87E-01 |
| <b>RP11-484L8.1</b>  | 0.10  | 6.00E-01 | 0.17  | 3.87E-01 |
| <b>RP3-417G15.1</b>  | 0.05  | 7.86E-01 | 0.17  | 3.87E-01 |
| <b>SERP2</b>         | -0.25 | 1.98E-01 | 0.17  | 3.87E-01 |
| <b>SGOL2</b>         | 0.12  | 5.53E-01 | 0.17  | 3.87E-01 |
| <b>SH2D6</b>         | 0.20  | 2.97E-01 | -0.17 | 3.87E-01 |
| <b>TMEM236</b>       | -0.04 | 8.33E-01 | -0.17 | 3.87E-01 |
| <b>TRGV7</b>         | 0.14  | 4.63E-01 | 0.17  | 3.87E-01 |
| <b>ZNF430</b>        | -0.28 | 1.51E-01 | -0.17 | 3.87E-01 |
| <b>ZRANB3</b>        | 0.36  | 6.09E-02 | -0.17 | 3.87E-01 |
| <b>AC008268.1</b>    | -0.01 | 9.70E-01 | -0.17 | 3.88E-01 |
| <b>AC138647.1</b>    | 0.02  | 9.12E-01 | -0.17 | 3.88E-01 |
| <b>G40138</b>        | 0.01  | 9.59E-01 | -0.17 | 3.88E-01 |
| <b>GLDN</b>          | -0.17 | 3.73E-01 | -0.17 | 3.88E-01 |
| <b>LANCL2</b>        | 0.19  | 3.32E-01 | -0.17 | 3.88E-01 |
| <b>LINC00906</b>     | -0.39 | 4.20E-02 | -0.17 | 3.88E-01 |
| <b>PDE6A</b>         | 0.26  | 1.78E-01 | -0.17 | 3.88E-01 |
| <b>RFTN2</b>         | -0.19 | 3.44E-01 | -0.17 | 3.88E-01 |
| <b>RP1-78O14.1</b>   | 0.10  | 6.03E-01 | -0.17 | 3.88E-01 |
| <b>RP11-159F24.3</b> | -0.21 | 2.79E-01 | -0.17 | 3.88E-01 |
| <b>RP11-204P2.3</b>  | -0.11 | 5.66E-01 | -0.17 | 3.88E-01 |
| <b>SMAD9</b>         | 0.03  | 8.97E-01 | -0.17 | 3.88E-01 |
| <b>SNORA59A</b>      | -0.23 | 2.48E-01 | -0.17 | 3.88E-01 |
| <b>SRSF11</b>        | -0.16 | 4.24E-01 | -0.17 | 3.88E-01 |
| <b>XLOC_006931</b>   | 0.09  | 6.50E-01 | -0.17 | 3.88E-01 |
| <b>AHR</b>           | 0.18  | 3.71E-01 | 0.17  | 3.88E-01 |
| <b>ARID1A</b>        | -0.09 | 6.61E-01 | 0.17  | 3.88E-01 |
| <b>CD247</b>         | 0.39  | 4.01E-02 | 0.17  | 3.88E-01 |
| <b>COL4A2</b>        | 0.03  | 8.99E-01 | 0.17  | 3.88E-01 |
| <b>CTD-3092A11.2</b> | -0.14 | 4.67E-01 | 0.17  | 3.88E-01 |
| <b>DICER1-AS1</b>    | 0.11  | 5.92E-01 | 0.17  | 3.88E-01 |
| <b>FREM3</b>         | -0.31 | 1.03E-01 | 0.17  | 3.88E-01 |

|               |       |          |       |          |
|---------------|-------|----------|-------|----------|
| G24100        | -0.50 | 6.34E-03 | 0.17  | 3.88E-01 |
| LINGO3        | -0.37 | 5.25E-02 | 0.17  | 3.88E-01 |
| MRPL49        | 0.25  | 2.08E-01 | 0.17  | 3.88E-01 |
| NINL          | 0.08  | 6.74E-01 | 0.17  | 3.88E-01 |
| RNU6-942P     | -0.10 | 6.28E-01 | 0.17  | 3.88E-01 |
| RP11-129B9.1  | -0.15 | 4.46E-01 | 0.17  | 3.88E-01 |
| RRBP1         | 0.16  | 4.29E-01 | 0.17  | 3.88E-01 |
| ZMYND10       | -0.12 | 5.30E-01 | 0.17  | 3.88E-01 |
| AC107079.1    | -0.28 | 1.56E-01 | 0.17  | 3.89E-01 |
| ANGPTL2       | -0.24 | 2.22E-01 | 0.17  | 3.89E-01 |
| BMP8A         | 0.05  | 8.12E-01 | 0.17  | 3.89E-01 |
| C12orf54      | 0.05  | 8.00E-01 | 0.17  | 3.89E-01 |
| C17orf53      | 0.18  | 3.63E-01 | -0.17 | 3.89E-01 |
| CA9           | 0.01  | 9.69E-01 | -0.17 | 3.89E-01 |
| CRYBB1        | -0.07 | 7.14E-01 | 0.17  | 3.89E-01 |
| CTA-29F11.1   | -0.14 | 4.93E-01 | -0.17 | 3.89E-01 |
| CTD-2536I1.2  | 0.10  | 6.18E-01 | 0.17  | 3.89E-01 |
| CTD-3032J10.2 | -0.17 | 3.91E-01 | 0.17  | 3.89E-01 |
| CTD-3220F14.3 | 0.05  | 7.94E-01 | 0.17  | 3.89E-01 |
| CXCR1         | -0.12 | 5.45E-01 | -0.17 | 3.89E-01 |
| G32125        | -0.04 | 8.59E-01 | 0.17  | 3.89E-01 |
| KLLN          | 0.38  | 4.89E-02 | 0.17  | 3.89E-01 |
| MINOS1        | 0.13  | 5.05E-01 | 0.17  | 3.89E-01 |
| NTHL1         | 0.45  | 1.71E-02 | 0.17  | 3.89E-01 |
| PHLDB1        | -0.10 | 6.22E-01 | 0.17  | 3.89E-01 |
| RP11-305L7.7  | -0.21 | 2.83E-01 | -0.17 | 3.89E-01 |
| RP2           | 0.21  | 2.86E-01 | -0.17 | 3.89E-01 |
| SLC18B1       | 0.44  | 2.02E-02 | 0.17  | 3.89E-01 |
| SLC35G6       | -0.13 | 5.02E-01 | 0.17  | 3.89E-01 |
| TOX           | 0.09  | 6.35E-01 | 0.17  | 3.89E-01 |
| XLOC_004201   | 0.00  | 9.87E-01 | 0.17  | 3.89E-01 |
| bP-2171C21.4  | -0.09 | 6.32E-01 | -0.17 | 3.89E-01 |
| ANGPTL1       | -0.27 | 1.63E-01 | -0.17 | 3.89E-01 |
| ANKRD10       | -0.42 | 2.74E-02 | -0.17 | 3.89E-01 |
| CALN1         | -0.18 | 3.60E-01 | -0.17 | 3.89E-01 |
| CNDP2         | 0.28  | 1.55E-01 | 0.17  | 3.89E-01 |
| DKFZP434A062  | 0.14  | 4.71E-01 | 0.17  | 3.89E-01 |
| DMKN          | -0.04 | 8.50E-01 | 0.17  | 3.89E-01 |
| HNRNPR        | 0.09  | 6.47E-01 | -0.17 | 3.89E-01 |
| HSPB2         | 0.13  | 4.95E-01 | -0.17 | 3.89E-01 |
| PDLIM3        | -0.14 | 4.67E-01 | -0.17 | 3.89E-01 |
| PIGG          | -0.02 | 9.00E-01 | -0.17 | 3.89E-01 |
| RP11-444D3.1  | 0.04  | 8.26E-01 | -0.17 | 3.89E-01 |
| RP11-522I20.3 | -0.14 | 4.81E-01 | 0.17  | 3.89E-01 |
| SRD5A3        | 0.30  | 1.21E-01 | 0.17  | 3.89E-01 |
| TM4SF19       | 0.25  | 2.09E-01 | 0.17  | 3.89E-01 |
| TNIK          | 0.03  | 8.80E-01 | 0.17  | 3.89E-01 |

|               |       |          |       |          |
|---------------|-------|----------|-------|----------|
| ZNF17         | 0.07  | 7.05E-01 | -0.17 | 3.89E-01 |
| AC016738.4    | -0.13 | 4.99E-01 | -0.17 | 3.90E-01 |
| APOD          | -0.16 | 4.29E-01 | -0.17 | 3.90E-01 |
| ATP2C2        | 0.02  | 9.00E-01 | -0.17 | 3.90E-01 |
| BMS1P1        | 0.05  | 8.05E-01 | -0.17 | 3.90E-01 |
| CBX6          | -0.10 | 6.07E-01 | -0.17 | 3.90E-01 |
| G34276        | -0.40 | 3.59E-02 | -0.17 | 3.90E-01 |
| 1-Mar         | -0.07 | 7.38E-01 | -0.17 | 3.90E-01 |
| MIR3657       | 0.22  | 2.71E-01 | -0.17 | 3.90E-01 |
| RAD51AP2      | 0.28  | 1.52E-01 | -0.17 | 3.90E-01 |
| RGMB-AS1      | 0.16  | 4.12E-01 | -0.17 | 3.90E-01 |
| RP11-178H8.7  | 0.10  | 5.98E-01 | -0.17 | 3.90E-01 |
| RP11-196E1.3  | -0.08 | 7.03E-01 | -0.17 | 3.90E-01 |
| RP11-252C15.1 | -0.22 | 2.53E-01 | -0.17 | 3.90E-01 |
| RP11-348N5.7  | -0.29 | 1.31E-01 | -0.17 | 3.90E-01 |
| RP11-460N11.2 | -0.22 | 2.61E-01 | -0.17 | 3.90E-01 |
| SERHL2        | 0.00  | 9.91E-01 | -0.17 | 3.90E-01 |
| TMEM240       | -0.26 | 1.74E-01 | -0.17 | 3.90E-01 |
| FTSJ3         | 0.12  | 5.37E-01 | 0.17  | 3.90E-01 |
| INIP          | 0.23  | 2.44E-01 | 0.17  | 3.90E-01 |
| ITM2C         | 0.05  | 7.84E-01 | 0.17  | 3.90E-01 |
| ITSN1         | -0.38 | 4.64E-02 | 0.17  | 3.90E-01 |
| METTL20       | 0.01  | 9.64E-01 | 0.17  | 3.90E-01 |
| NTN4          | -0.03 | 8.63E-01 | 0.17  | 3.90E-01 |
| PDCL          | 0.02  | 9.20E-01 | 0.17  | 3.90E-01 |
| RP11-204C16.4 | -0.06 | 7.79E-01 | 0.17  | 3.90E-01 |
| RP11-731D1.1  | 0.09  | 6.63E-01 | 0.17  | 3.90E-01 |
| SLC34A1       | 0.15  | 4.41E-01 | 0.17  | 3.90E-01 |
| SMARCD2       | 0.15  | 4.33E-01 | 0.17  | 3.90E-01 |
| SNX18P12      | -0.01 | 9.58E-01 | 0.17  | 3.90E-01 |
| WFDC5         | 0.38  | 4.61E-02 | 0.17  | 3.90E-01 |
| DBI           | 0.07  | 7.37E-01 | 0.17  | 3.91E-01 |
| ICAM3         | -0.25 | 1.98E-01 | 0.17  | 3.91E-01 |
| PTTG3P        | 0.06  | 7.70E-01 | 0.17  | 3.91E-01 |
| RP11-6N17.4   | 0.18  | 3.61E-01 | 0.17  | 3.91E-01 |
| SLC44A1       | 0.00  | 9.98E-01 | 0.17  | 3.91E-01 |
| TBC1D20       | 0.12  | 5.45E-01 | 0.17  | 3.91E-01 |
| AP001189.4    | -0.04 | 8.42E-01 | -0.17 | 3.91E-01 |
| DDX26B        | -0.05 | 8.00E-01 | -0.17 | 3.91E-01 |
| DZIP1L        | -0.42 | 2.53E-02 | -0.17 | 3.91E-01 |
| MEF2C         | -0.31 | 1.07E-01 | -0.17 | 3.91E-01 |
| MPPED2        | -0.39 | 3.80E-02 | -0.17 | 3.91E-01 |
| RASSF8-AS1    | -0.45 | 1.65E-02 | -0.17 | 3.91E-01 |
| RNF139-AS1    | 0.07  | 7.10E-01 | -0.17 | 3.91E-01 |
| RP11-358D17.2 | 0.00  | 9.90E-01 | -0.17 | 3.91E-01 |
| RP11-78I14.1  | -0.03 | 8.62E-01 | -0.17 | 3.91E-01 |
| ZNF14         | 0.02  | 9.13E-01 | -0.17 | 3.91E-01 |



|                |       |          |       |          |
|----------------|-------|----------|-------|----------|
| AC083822.2     | -0.24 | 2.13E-01 | -0.17 | 3.92E-01 |
| CCKBR          | 0.00  | 9.89E-01 | -0.17 | 3.92E-01 |
| CTD-2325P2.4   | -0.05 | 8.12E-01 | -0.17 | 3.92E-01 |
| CTD-2647L4.1   | -0.03 | 8.75E-01 | 0.17  | 3.92E-01 |
| FOCAD          | -0.07 | 7.22E-01 | -0.17 | 3.92E-01 |
| G22924         | -0.32 | 1.00E-01 | -0.17 | 3.92E-01 |
| G4674          | 0.14  | 4.93E-01 | 0.17  | 3.92E-01 |
| MEG8           | -0.20 | 2.96E-01 | -0.17 | 3.92E-01 |
| NLRP9          | -0.24 | 2.14E-01 | -0.17 | 3.92E-01 |
| RNU6-1095P     | 0.31  | 1.08E-01 | -0.17 | 3.92E-01 |
| RNU6-418P      | -0.25 | 1.94E-01 | -0.17 | 3.92E-01 |
| RP1-69D17.4    | -0.09 | 6.53E-01 | 0.17  | 3.92E-01 |
| RP11-1102P22.2 | 0.16  | 4.06E-01 | -0.17 | 3.92E-01 |
| RP11-256K9.1   | 0.05  | 8.01E-01 | 0.17  | 3.92E-01 |
| RP11-307E17.8  | -0.08 | 6.94E-01 | -0.17 | 3.92E-01 |
| RP11-546O6.4   | 0.09  | 6.32E-01 | 0.17  | 3.92E-01 |
| RP11-574K11.8  | -0.09 | 6.45E-01 | 0.17  | 3.92E-01 |
| RP11-61F12.1   | 0.01  | 9.51E-01 | 0.17  | 3.92E-01 |
| RP11-738E22.3  | -0.01 | 9.77E-01 | 0.17  | 3.92E-01 |
| SH3BP5-AS1     | -0.22 | 2.67E-01 | -0.17 | 3.92E-01 |
| SLC11A1        | -0.17 | 3.78E-01 | 0.17  | 3.92E-01 |
| SLC25A16       | 0.01  | 9.50E-01 | -0.17 | 3.92E-01 |
| TLCD2          | -0.03 | 8.79E-01 | 0.17  | 3.92E-01 |
| AC006946.12    | 0.04  | 8.58E-01 | -0.17 | 3.93E-01 |
| AC073641.2     | -0.08 | 6.76E-01 | -0.17 | 3.93E-01 |
| AC084809.2     | 0.09  | 6.63E-01 | -0.17 | 3.93E-01 |
| COG2           | 0.11  | 5.84E-01 | -0.17 | 3.93E-01 |
| GSTM1          | 0.21  | 2.80E-01 | -0.17 | 3.93E-01 |
| MRGPRF-AS1     | -0.29 | 1.33E-01 | -0.17 | 3.93E-01 |
| NFXL1          | 0.00  | 9.93E-01 | -0.17 | 3.93E-01 |
| NR4A2          | -0.15 | 4.49E-01 | -0.17 | 3.93E-01 |
| RN7SL268P      | -0.15 | 4.41E-01 | -0.17 | 3.93E-01 |
| RP11-15A1.2    | 0.44  | 1.99E-02 | -0.17 | 3.93E-01 |
| RP11-430B1.2   | 0.17  | 3.96E-01 | -0.17 | 3.93E-01 |
| RP11-756H20.1  | 0.17  | 4.00E-01 | -0.17 | 3.93E-01 |
| RP11-98D18.1   | -0.13 | 5.01E-01 | -0.17 | 3.93E-01 |
| TIAM1          | -0.16 | 4.17E-01 | -0.17 | 3.93E-01 |
| TRGV4          | 0.43  | 2.25E-02 | -0.17 | 3.93E-01 |
| VPS4B          | 0.15  | 4.48E-01 | -0.17 | 3.93E-01 |
| Z83826.1       | -0.05 | 8.07E-01 | -0.17 | 3.93E-01 |
| ZBTB18         | -0.20 | 3.14E-01 | -0.17 | 3.93E-01 |
| ACBD6          | 0.08  | 6.73E-01 | 0.17  | 3.93E-01 |
| AUH            | -0.01 | 9.75E-01 | 0.17  | 3.93E-01 |
| CAMKMT         | -0.15 | 4.49E-01 | 0.17  | 3.93E-01 |
| CD163          | 0.06  | 7.77E-01 | 0.17  | 3.93E-01 |
| ELMO1          | 0.09  | 6.38E-01 | 0.17  | 3.93E-01 |
| LINC00299      | 0.19  | 3.24E-01 | 0.17  | 3.93E-01 |

|               |       |          |       |          |
|---------------|-------|----------|-------|----------|
| MOB3B         | 0.15  | 4.34E-01 | 0.17  | 3.93E-01 |
| MSLN          | -0.11 | 5.85E-01 | 0.17  | 3.93E-01 |
| MTAP          | 0.21  | 2.85E-01 | 0.17  | 3.93E-01 |
| OVOL3         | -0.12 | 5.33E-01 | 0.17  | 3.93E-01 |
| RLTPR         | -0.05 | 7.99E-01 | 0.17  | 3.93E-01 |
| RN7SL15P      | -0.04 | 8.59E-01 | 0.17  | 3.93E-01 |
| RN7SL459P     | -0.42 | 2.44E-02 | 0.17  | 3.93E-01 |
| RP4-718D20.3  | 0.12  | 5.29E-01 | 0.17  | 3.93E-01 |
| SMPDL3A       | 0.06  | 7.51E-01 | 0.17  | 3.93E-01 |
| ABHD16A       | -0.41 | 3.02E-02 | -0.17 | 3.94E-01 |
| AC092431.3    | -0.25 | 2.08E-01 | -0.17 | 3.94E-01 |
| B3GNT2        | 0.06  | 7.63E-01 | 0.17  | 3.94E-01 |
| CCDC74A       | -0.13 | 5.04E-01 | -0.17 | 3.94E-01 |
| CTD-2012K14.2 | -0.17 | 4.01E-01 | 0.17  | 3.94E-01 |
| DHRS11        | 0.03  | 8.78E-01 | -0.17 | 3.94E-01 |
| DNM1P46       | -0.18 | 3.70E-01 | -0.17 | 3.94E-01 |
| EFHC2         | -0.15 | 4.55E-01 | -0.17 | 3.94E-01 |
| FBXL15        | -0.03 | 8.68E-01 | 0.17  | 3.94E-01 |
| FBXL22        | 0.30  | 1.22E-01 | 0.17  | 3.94E-01 |
| FBXO8         | -0.09 | 6.52E-01 | -0.17 | 3.94E-01 |
| GAD1          | -0.14 | 4.79E-01 | -0.17 | 3.94E-01 |
| IL11RA        | -0.24 | 2.13E-01 | -0.17 | 3.94E-01 |
| KIF21B        | 0.28  | 1.43E-01 | 0.17  | 3.94E-01 |
| NOTCH2NL      | -0.16 | 4.14E-01 | -0.17 | 3.94E-01 |
| NUDT7         | 0.21  | 2.83E-01 | 0.17  | 3.94E-01 |
| PNCK          | -0.03 | 8.61E-01 | 0.17  | 3.94E-01 |
| RASA4DP       | -0.08 | 6.93E-01 | -0.17 | 3.94E-01 |
| RP11-116K4.1  | -0.16 | 4.16E-01 | -0.17 | 3.94E-01 |
| RP11-196B3.1  | -0.26 | 1.73E-01 | -0.17 | 3.94E-01 |
| RP11-351I24.1 | -0.14 | 4.67E-01 | 0.17  | 3.94E-01 |
| RP11-390P2.2  | -0.21 | 2.93E-01 | -0.17 | 3.94E-01 |
| RP11-482L11.1 | -0.02 | 9.35E-01 | -0.17 | 3.94E-01 |
| SLC6A20       | 0.03  | 8.77E-01 | -0.17 | 3.94E-01 |
| SOD2          | 0.24  | 2.11E-01 | 0.17  | 3.94E-01 |
| SUPT16H       | -0.05 | 7.88E-01 | -0.17 | 3.94E-01 |
| SYNE1-AS1     | -0.54 | 2.75E-03 | -0.17 | 3.94E-01 |
| TMEM55B       | 0.10  | 6.07E-01 | -0.17 | 3.94E-01 |
| UCP3          | 0.19  | 3.21E-01 | -0.17 | 3.94E-01 |
| VAPB          | -0.39 | 3.85E-02 | 0.17  | 3.94E-01 |
| XLOC_007240   | 0.01  | 9.76E-01 | -0.17 | 3.94E-01 |
| ZNF561-AS1    | -0.05 | 7.93E-01 | 0.17  | 3.94E-01 |
| ARHGAP33      | -0.13 | 5.06E-01 | -0.17 | 3.95E-01 |
| ATP6V1E2      | -0.34 | 7.61E-02 | -0.17 | 3.95E-01 |
| C15orf61      | 0.23  | 2.36E-01 | -0.17 | 3.95E-01 |
| DYRK4         | 0.15  | 4.53E-01 | 0.17  | 3.95E-01 |
| EEF1B2P6      | 0.09  | 6.36E-01 | 0.17  | 3.95E-01 |
| FAH           | -0.21 | 2.80E-01 | 0.17  | 3.95E-01 |

|               |       |          |       |          |
|---------------|-------|----------|-------|----------|
| FAM60A        | 0.23  | 2.31E-01 | -0.17 | 3.95E-01 |
| G9217         | -0.20 | 3.04E-01 | -0.17 | 3.95E-01 |
| GTF2H2B       | -0.32 | 9.93E-02 | 0.17  | 3.95E-01 |
| HIST4H4       | 0.21  | 2.95E-01 | 0.17  | 3.95E-01 |
| JAKMIP2       | -0.19 | 3.36E-01 | -0.17 | 3.95E-01 |
| PCYT2         | 0.16  | 4.27E-01 | 0.17  | 3.95E-01 |
| PDE4DIP       | -0.17 | 4.00E-01 | -0.17 | 3.95E-01 |
| PDPR          | -0.04 | 8.48E-01 | 0.17  | 3.95E-01 |
| PTGR1         | 0.18  | 3.53E-01 | 0.17  | 3.95E-01 |
| QSER1         | 0.14  | 4.93E-01 | -0.17 | 3.95E-01 |
| RNMTL1        | 0.27  | 1.65E-01 | 0.17  | 3.95E-01 |
| RP11-27G24.3  | -0.07 | 7.17E-01 | -0.17 | 3.95E-01 |
| RP11-343H19.1 | -0.09 | 6.33E-01 | -0.17 | 3.95E-01 |
| RP11-4B16.3   | 0.30  | 1.20E-01 | 0.17  | 3.95E-01 |
| RP4-635A23.6  | 0.19  | 3.20E-01 | -0.17 | 3.95E-01 |
| RP5-875H18.4  | -0.05 | 7.98E-01 | -0.17 | 3.95E-01 |
| SDHAF4        | 0.05  | 8.05E-01 | -0.17 | 3.95E-01 |
| SEC23A        | -0.08 | 6.96E-01 | -0.17 | 3.95E-01 |
| TMEM107       | -0.14 | 4.92E-01 | 0.17  | 3.95E-01 |
| UBL7          | 0.00  | 9.85E-01 | 0.17  | 3.95E-01 |
| USP49         | -0.16 | 4.12E-01 | -0.17 | 3.95E-01 |
| XLOC_009342   | -0.01 | 9.50E-01 | -0.17 | 3.95E-01 |
| XLOC_013995   | 0.01  | 9.59E-01 | 0.17  | 3.95E-01 |
| ZC3H7A        | -0.01 | 9.51E-01 | 0.17  | 3.95E-01 |
| AP2M1         | 0.15  | 4.37E-01 | 0.17  | 3.95E-01 |
| ASH1L-AS1     | -0.14 | 4.92E-01 | 0.17  | 3.95E-01 |
| BRD7P4        | -0.18 | 3.47E-01 | -0.17 | 3.95E-01 |
| CBWD6         | 0.04  | 8.28E-01 | -0.17 | 3.95E-01 |
| CCDC153       | -0.02 | 9.15E-01 | 0.17  | 3.95E-01 |
| CEBPB-AS1     | -0.13 | 5.23E-01 | -0.17 | 3.95E-01 |
| CNN2          | 0.33  | 8.42E-02 | 0.17  | 3.95E-01 |
| CRYBA1        | -0.16 | 4.04E-01 | -0.17 | 3.95E-01 |
| H3F3B         | 0.05  | 8.04E-01 | -0.17 | 3.95E-01 |
| HORMAD1       | -0.31 | 1.12E-01 | 0.17  | 3.95E-01 |
| IL18          | -0.08 | 6.70E-01 | -0.17 | 3.95E-01 |
| KIF1BP        | 0.27  | 1.73E-01 | 0.17  | 3.95E-01 |
| KLHL35        | -0.04 | 8.51E-01 | 0.17  | 3.95E-01 |
| KNSTRN        | 0.08  | 6.88E-01 | 0.17  | 3.95E-01 |
| METTL4        | 0.11  | 5.63E-01 | -0.17 | 3.95E-01 |
| MPG           | 0.28  | 1.46E-01 | 0.17  | 3.95E-01 |
| PIAS1         | -0.11 | 5.82E-01 | -0.17 | 3.95E-01 |
| RIPK1         | 0.08  | 6.94E-01 | 0.17  | 3.95E-01 |
| RNF216-IT1    | 0.23  | 2.34E-01 | -0.17 | 3.95E-01 |
| RP11-111H13.1 | 0.08  | 6.91E-01 | -0.17 | 3.95E-01 |
| RP11-236F9.2  | -0.03 | 8.61E-01 | 0.17  | 3.95E-01 |
| RP11-396C23.4 | -0.01 | 9.57E-01 | -0.17 | 3.95E-01 |
| RP4-669P10.20 | -0.26 | 1.79E-01 | -0.17 | 3.95E-01 |

|                |       |          |       |          |
|----------------|-------|----------|-------|----------|
| SPDYE16        | -0.11 | 5.62E-01 | -0.17 | 3.95E-01 |
| STAT1          | 0.31  | 1.03E-01 | 0.17  | 3.95E-01 |
| XLOC_007860    | -0.17 | 3.98E-01 | -0.17 | 3.95E-01 |
| AC093495.4     | -0.08 | 6.77E-01 | -0.17 | 3.96E-01 |
| AF127577.13    | 0.14  | 4.93E-01 | -0.17 | 3.96E-01 |
| APEX2          | 0.27  | 1.71E-01 | 0.17  | 3.96E-01 |
| BMS1P4         | -0.02 | 9.33E-01 | -0.17 | 3.96E-01 |
| CTD-2008L17.1  | 0.00  | 1.00E+00 | 0.17  | 3.96E-01 |
| CTD-2515H24.4  | 0.02  | 9.05E-01 | -0.17 | 3.96E-01 |
| CTD-2527I21.14 | -0.04 | 8.58E-01 | -0.17 | 3.96E-01 |
| DVL2           | -0.24 | 2.11E-01 | 0.17  | 3.96E-01 |
| G34275         | -0.04 | 8.24E-01 | -0.17 | 3.96E-01 |
| GOLGB1         | -0.20 | 3.08E-01 | -0.17 | 3.96E-01 |
| MIR4804        | 0.00  | 1.00E+00 | -0.17 | 3.96E-01 |
| MTO1           | 0.16  | 4.04E-01 | 0.17  | 3.96E-01 |
| ODC1           | -0.10 | 6.24E-01 | -0.17 | 3.96E-01 |
| PCBP2-OT1      | -0.01 | 9.53E-01 | -0.17 | 3.96E-01 |
| RP11-155L15.1  | 0.18  | 3.71E-01 | 0.17  | 3.96E-01 |
| RP11-219B4.7   | -0.15 | 4.54E-01 | -0.17 | 3.96E-01 |
| RP11-95J11.1   | 0.00  | 9.98E-01 | -0.17 | 3.96E-01 |
| RP13-452N2.1   | 0.44  | 1.96E-02 | -0.17 | 3.96E-01 |
| RP5-907C10.3   | 0.16  | 4.10E-01 | -0.17 | 3.96E-01 |
| RTKN           | 0.03  | 8.67E-01 | 0.17  | 3.96E-01 |
| SUPT5H         | 0.05  | 8.13E-01 | 0.17  | 3.96E-01 |
| TPRG1-AS2      | -0.37 | 5.21E-02 | -0.17 | 3.96E-01 |
| UBE4A          | 0.11  | 5.86E-01 | -0.17 | 3.96E-01 |
| XCR1           | 0.15  | 4.43E-01 | 0.17  | 3.96E-01 |
| XLOC_013962    | 0.01  | 9.76E-01 | 0.17  | 3.96E-01 |
| AC021188.4     | -0.09 | 6.53E-01 | 0.17  | 3.97E-01 |
| CD1E           | 0.14  | 4.87E-01 | 0.17  | 3.97E-01 |
| CH17-353B19.1  | 0.26  | 1.85E-01 | 0.17  | 3.97E-01 |
| COL8A2         | -0.03 | 8.95E-01 | 0.17  | 3.97E-01 |
| CYCSP34        | 0.03  | 8.90E-01 | -0.17 | 3.97E-01 |
| DNTTIP1        | -0.06 | 7.62E-01 | 0.17  | 3.97E-01 |
| GPR89B         | -0.03 | 8.93E-01 | -0.17 | 3.97E-01 |
| JOSD2          | 0.19  | 3.39E-01 | 0.17  | 3.97E-01 |
| LINC00857      | -0.29 | 1.37E-01 | -0.17 | 3.97E-01 |
| MRVI1          | 0.06  | 7.81E-01 | 0.17  | 3.97E-01 |
| MTATP6P15      | -0.15 | 4.60E-01 | -0.17 | 3.97E-01 |
| OPHN1          | -0.34 | 7.46E-02 | -0.17 | 3.97E-01 |
| OR5C1          | -0.04 | 8.25E-01 | -0.17 | 3.97E-01 |
| RAB30-AS1      | 0.01  | 9.76E-01 | 0.17  | 3.97E-01 |
| RNU6-387P      | 0.20  | 2.98E-01 | 0.17  | 3.97E-01 |
| RP11-532F6.2   | -0.15 | 4.60E-01 | -0.17 | 3.97E-01 |
| RP11-567M16.5  | 0.13  | 4.95E-01 | 0.17  | 3.97E-01 |
| RP11-981G7.1   | -0.21 | 2.84E-01 | -0.17 | 3.97E-01 |
| RP5-994D16.9   | -0.10 | 6.30E-01 | 0.17  | 3.97E-01 |

|               |       |          |       |          |
|---------------|-------|----------|-------|----------|
| SAMHD1        | 0.14  | 4.79E-01 | 0.17  | 3.97E-01 |
| SCN11A        | 0.08  | 6.90E-01 | -0.17 | 3.97E-01 |
| SIK3          | -0.45 | 1.72E-02 | -0.17 | 3.97E-01 |
| SLF1          | 0.10  | 5.97E-01 | -0.17 | 3.97E-01 |
| SLX4IP        | 0.03  | 8.82E-01 | 0.17  | 3.97E-01 |
| SYNCRIP       | 0.05  | 7.85E-01 | -0.17 | 3.97E-01 |
| TMEM200A      | -0.39 | 3.98E-02 | -0.17 | 3.97E-01 |
| TPH1          | -0.12 | 5.56E-01 | -0.17 | 3.97E-01 |
| ANKEF1        | 0.41  | 3.03E-02 | 0.17  | 3.98E-01 |
| AP000473.5    | -0.14 | 4.85E-01 | -0.17 | 3.98E-01 |
| ARHGGEF28     | -0.36 | 5.94E-02 | -0.17 | 3.98E-01 |
| ASAH1         | -0.11 | 5.82E-01 | -0.17 | 3.98E-01 |
| C19orf47      | -0.05 | 7.96E-01 | 0.17  | 3.98E-01 |
| C1QBPP2       | -0.18 | 3.64E-01 | -0.17 | 3.98E-01 |
| CACUL1        | 0.29  | 1.29E-01 | 0.17  | 3.98E-01 |
| CLEC4GP1      | -0.01 | 9.68E-01 | 0.17  | 3.98E-01 |
| CNTN3         | -0.21 | 2.87E-01 | -0.17 | 3.98E-01 |
| CTA-972D3.2   | -0.07 | 7.41E-01 | -0.17 | 3.98E-01 |
| CTAGE15       | 0.20  | 2.98E-01 | -0.17 | 3.98E-01 |
| CTD-2010I16.1 | -0.04 | 8.31E-01 | -0.17 | 3.98E-01 |
| CTD-2146O16.1 | -0.05 | 8.18E-01 | -0.17 | 3.98E-01 |
| ECT2          | 0.08  | 6.90E-01 | -0.17 | 3.98E-01 |
| ENDOD1        | -0.04 | 8.49E-01 | 0.17  | 3.98E-01 |
| FGFR4         | 0.03  | 8.65E-01 | -0.17 | 3.98E-01 |
| FRG2JP        | 0.04  | 8.37E-01 | -0.17 | 3.98E-01 |
| GTF2H3        | 0.18  | 3.70E-01 | -0.17 | 3.98E-01 |
| POU5F1P6      | -0.13 | 4.94E-01 | -0.17 | 3.98E-01 |
| RASA1         | 0.24  | 2.19E-01 | -0.17 | 3.98E-01 |
| RDH11         | 0.17  | 3.84E-01 | 0.17  | 3.98E-01 |
| RELT          | 0.06  | 7.68E-01 | 0.17  | 3.98E-01 |
| RP11-530C5.4  | -0.35 | 6.39E-02 | -0.17 | 3.98E-01 |
| RP11-63G10.3  | -0.18 | 3.53E-01 | -0.17 | 3.98E-01 |
| RP11-680F20.5 | -0.14 | 4.68E-01 | -0.17 | 3.98E-01 |
| RP11-723O4.6  | 0.06  | 7.79E-01 | 0.17  | 3.98E-01 |
| RP11-73M18.6  | 0.13  | 5.01E-01 | -0.17 | 3.98E-01 |
| RPP14         | 0.35  | 6.50E-02 | -0.17 | 3.98E-01 |
| SNORA46       | 0.25  | 2.08E-01 | 0.17  | 3.98E-01 |
| SYAP1         | -0.11 | 5.77E-01 | -0.17 | 3.98E-01 |
| SYCN          | 0.00  | 9.92E-01 | -0.17 | 3.98E-01 |
| TMOD3         | 0.17  | 3.74E-01 | -0.17 | 3.98E-01 |
| UFSP2         | 0.17  | 3.99E-01 | -0.17 | 3.98E-01 |
| ZNF473        | 0.10  | 6.19E-01 | 0.17  | 3.98E-01 |
| AC013267.1    | 0.23  | 2.40E-01 | 0.17  | 3.99E-01 |
| AL365502.1    | -0.23 | 2.48E-01 | -0.17 | 3.99E-01 |
| CCDC78        | -0.25 | 1.95E-01 | -0.17 | 3.99E-01 |
| CR1           | 0.00  | 9.96E-01 | 0.17  | 3.99E-01 |
| CTA-797E19.2  | 0.16  | 4.08E-01 | -0.17 | 3.99E-01 |

|                |       |          |       |          |
|----------------|-------|----------|-------|----------|
| HSPE1P2        | 0.20  | 3.03E-01 | -0.17 | 3.99E-01 |
| KIF17          | -0.05 | 8.07E-01 | 0.17  | 3.99E-01 |
| LHFPL1         | 0.02  | 9.12E-01 | 0.17  | 3.99E-01 |
| LINC01535      | 0.12  | 5.31E-01 | 0.17  | 3.99E-01 |
| NLN            | -0.01 | 9.43E-01 | -0.17 | 3.99E-01 |
| NPLOC4         | 0.16  | 4.22E-01 | 0.17  | 3.99E-01 |
| PRSS56         | 0.12  | 5.47E-01 | -0.17 | 3.99E-01 |
| RP11-1085N6.2  | 0.04  | 8.36E-01 | -0.17 | 3.99E-01 |
| RP11-114M5.1   | -0.19 | 3.37E-01 | -0.17 | 3.99E-01 |
| RP11-28B23.1   | -0.18 | 3.70E-01 | -0.17 | 3.99E-01 |
| RP11-342K2.1   | 0.14  | 4.83E-01 | -0.17 | 3.99E-01 |
| RP11-709D24.8  | 0.01  | 9.40E-01 | -0.17 | 3.99E-01 |
| RP11-799B12.2  | -0.21 | 2.91E-01 | 0.17  | 3.99E-01 |
| RP11-87H9.5    | -0.39 | 4.29E-02 | -0.17 | 3.99E-01 |
| SLC6A13        | 0.19  | 3.44E-01 | -0.17 | 3.99E-01 |
| SVIL           | -0.09 | 6.62E-01 | -0.17 | 3.99E-01 |
| WISP1          | -0.11 | 5.71E-01 | 0.17  | 3.99E-01 |
| XLOC_005569    | 0.08  | 6.76E-01 | -0.17 | 3.99E-01 |
| XLOC_014038    | -0.02 | 9.11E-01 | -0.17 | 3.99E-01 |
| ZNF718         | 0.19  | 3.23E-01 | 0.17  | 3.99E-01 |
| AKT3-IT1       | 0.09  | 6.56E-01 | 0.17  | 4.00E-01 |
| CHD4           | -0.23 | 2.39E-01 | 0.17  | 4.00E-01 |
| KIAA0100       | 0.27  | 1.59E-01 | 0.17  | 4.00E-01 |
| PRDM8          | 0.11  | 5.83E-01 | 0.17  | 4.00E-01 |
| RANBP9         | 0.17  | 3.97E-01 | 0.17  | 4.00E-01 |
| RP11-310E22.4  | -0.21 | 2.93E-01 | 0.17  | 4.00E-01 |
| SRGN           | 0.08  | 6.80E-01 | 0.17  | 4.00E-01 |
| TFEB           | 0.19  | 3.40E-01 | 0.17  | 4.00E-01 |
| WNT10B         | -0.11 | 5.74E-01 | 0.17  | 4.00E-01 |
| ZNF521         | -0.20 | 3.00E-01 | 0.17  | 4.00E-01 |
| AC063976.7     | 0.10  | 5.95E-01 | -0.17 | 4.00E-01 |
| AMD1P1         | -0.27 | 1.59E-01 | -0.17 | 4.00E-01 |
| GUCY1A2        | -0.09 | 6.62E-01 | -0.17 | 4.00E-01 |
| HSD17B8        | 0.02  | 9.18E-01 | -0.17 | 4.00E-01 |
| IL22RA2        | 0.40  | 3.58E-02 | -0.17 | 4.00E-01 |
| LRR1           | 0.20  | 3.13E-01 | -0.17 | 4.00E-01 |
| MIR429         | -0.21 | 2.80E-01 | -0.17 | 4.00E-01 |
| PROX2          | -0.23 | 2.32E-01 | -0.17 | 4.00E-01 |
| RP11-793H13.11 | 0.01  | 9.67E-01 | -0.17 | 4.00E-01 |
| SYTL3          | 0.46  | 1.43E-02 | -0.17 | 4.00E-01 |
| ZNF548         | 0.08  | 6.90E-01 | -0.17 | 4.00E-01 |
| AC007193.6     | 0.12  | 5.38E-01 | -0.17 | 4.01E-01 |
| AC024937.6     | -0.32 | 9.21E-02 | -0.17 | 4.01E-01 |
| ADAMTS7P4      | -0.02 | 9.02E-01 | 0.17  | 4.01E-01 |
| AP000560.3     | -0.10 | 6.10E-01 | -0.17 | 4.01E-01 |
| B3GAT1         | -0.04 | 8.59E-01 | 0.17  | 4.01E-01 |
| CD81-AS1       | -0.53 | 3.68E-03 | -0.17 | 4.01E-01 |

|                      |       |          |       |          |
|----------------------|-------|----------|-------|----------|
| <b>CTC-523E23.3</b>  | 0.44  | 1.98E-02 | -0.17 | 4.01E-01 |
| <b>FBXO32</b>        | -0.20 | 3.05E-01 | -0.17 | 4.01E-01 |
| <b>G34192</b>        | 0.15  | 4.46E-01 | -0.17 | 4.01E-01 |
| <b>G5617</b>         | -0.17 | 3.90E-01 | -0.17 | 4.01E-01 |
| <b>GOLT1B</b>        | 0.06  | 7.46E-01 | -0.17 | 4.01E-01 |
| <b>HIF1A</b>         | 0.33  | 8.42E-02 | 0.17  | 4.01E-01 |
| <b>HMG3</b>          | -0.01 | 9.59E-01 | -0.17 | 4.01E-01 |
| <b>KCNK6</b>         | 0.02  | 9.33E-01 | 0.17  | 4.01E-01 |
| <b>KRT80</b>         | 0.35  | 6.59E-02 | 0.17  | 4.01E-01 |
| <b>LRRIQ1</b>        | -0.24 | 2.11E-01 | 0.17  | 4.01E-01 |
| <b>MAGT1</b>         | 0.19  | 3.28E-01 | -0.17 | 4.01E-01 |
| <b>MZF1-AS1</b>      | -0.21 | 2.91E-01 | -0.17 | 4.01E-01 |
| <b>PIGH</b>          | -0.27 | 1.72E-01 | 0.17  | 4.01E-01 |
| <b>RP11-434H6.6</b>  | 0.50  | 6.86E-03 | 0.17  | 4.01E-01 |
| <b>RP11-769O8.1</b>  | -0.16 | 4.06E-01 | -0.17 | 4.01E-01 |
| <b>RP4-625H18.2</b>  | -0.10 | 6.00E-01 | -0.17 | 4.01E-01 |
| <b>RP6-65G23.3</b>   | 0.20  | 3.07E-01 | 0.17  | 4.01E-01 |
| <b>TRIB1</b>         | -0.04 | 8.38E-01 | 0.17  | 4.01E-01 |
| <b>URB1</b>          | 0.17  | 3.85E-01 | 0.17  | 4.01E-01 |
| <b>VWA8</b>          | -0.16 | 4.17E-01 | -0.17 | 4.01E-01 |
| <b>ZDHHC21</b>       | 0.26  | 1.83E-01 | 0.17  | 4.01E-01 |
| <b>AC107983.4</b>    | 0.31  | 1.14E-01 | -0.17 | 4.01E-01 |
| <b>APBB3</b>         | -0.01 | 9.65E-01 | 0.17  | 4.01E-01 |
| <b>BLOC1S2</b>       | 0.21  | 2.91E-01 | 0.17  | 4.01E-01 |
| <b>CALM3</b>         | 0.05  | 8.01E-01 | 0.17  | 4.01E-01 |
| <b>CD5</b>           | 0.25  | 2.00E-01 | 0.17  | 4.01E-01 |
| <b>CTD-2331H12.7</b> | 0.04  | 8.43E-01 | -0.17 | 4.01E-01 |
| <b>CTD-2340D6.1</b>  | -0.11 | 5.68E-01 | -0.17 | 4.01E-01 |
| <b>G43442</b>        | 0.15  | 4.48E-01 | -0.17 | 4.01E-01 |
| <b>IQGAP3</b>        | -0.02 | 9.37E-01 | -0.17 | 4.01E-01 |
| <b>KRTAP10-2</b>     | 0.05  | 7.94E-01 | 0.17  | 4.01E-01 |
| <b>PDE4D</b>         | 0.06  | 7.66E-01 | -0.17 | 4.01E-01 |
| <b>PITPNC1</b>       | 0.19  | 3.29E-01 | 0.17  | 4.01E-01 |
| <b>RAB5CP2</b>       | -0.40 | 3.43E-02 | -0.17 | 4.01E-01 |
| <b>RGMA</b>          | -0.22 | 2.63E-01 | 0.17  | 4.01E-01 |
| <b>RHBDL3</b>        | -0.12 | 5.54E-01 | -0.17 | 4.01E-01 |
| <b>RNU4-51P</b>      | 0.02  | 9.05E-01 | -0.17 | 4.01E-01 |
| <b>RP11-1110J8.1</b> | -0.23 | 2.31E-01 | -0.17 | 4.01E-01 |
| <b>RP11-445N18.7</b> | 0.12  | 5.36E-01 | -0.17 | 4.01E-01 |
| <b>RP11-678G14.3</b> | -0.17 | 3.89E-01 | -0.17 | 4.01E-01 |
| <b>RP11-799M12.2</b> | -0.07 | 7.40E-01 | 0.17  | 4.01E-01 |
| <b>RP3-449M8.6</b>   | -0.23 | 2.45E-01 | 0.17  | 4.01E-01 |
| <b>RPSAP12</b>       | 0.01  | 9.40E-01 | -0.17 | 4.01E-01 |
| <b>SCOC-AS1</b>      | -0.24 | 2.24E-01 | -0.17 | 4.01E-01 |
| <b>TAP2</b>          | 0.28  | 1.46E-01 | 0.17  | 4.01E-01 |
| <b>TMTC3</b>         | 0.09  | 6.49E-01 | 0.17  | 4.01E-01 |
| <b>TSGA10IP</b>      | -0.33 | 9.09E-02 | -0.17 | 4.01E-01 |

|                      |       |          |       |          |
|----------------------|-------|----------|-------|----------|
| <b>XLOC_001913</b>   | 0.02  | 9.11E-01 | 0.17  | 4.01E-01 |
| <b>XLOC_005247</b>   | -0.08 | 6.95E-01 | 0.17  | 4.01E-01 |
| <b>AC011738.4</b>    | -0.06 | 7.43E-01 | 0.17  | 4.02E-01 |
| <b>AC022400.1</b>    | 0.11  | 5.73E-01 | -0.17 | 4.02E-01 |
| <b>ANO9</b>          | -0.11 | 5.72E-01 | -0.17 | 4.02E-01 |
| <b>ARL14EP</b>       | 0.06  | 7.57E-01 | -0.17 | 4.02E-01 |
| <b>C8orf22</b>       | -0.21 | 2.72E-01 | 0.17  | 4.02E-01 |
| <b>CELSR3-AS1</b>    | 0.17  | 3.87E-01 | 0.17  | 4.02E-01 |
| <b>COL7A1</b>        | 0.05  | 8.14E-01 | 0.17  | 4.02E-01 |
| <b>COQ10A</b>        | -0.06 | 7.70E-01 | -0.17 | 4.02E-01 |
| <b>DECR1</b>         | 0.12  | 5.35E-01 | -0.17 | 4.02E-01 |
| <b>DKK1</b>          | 0.08  | 6.94E-01 | -0.17 | 4.02E-01 |
| <b>ERO1B</b>         | -0.01 | 9.54E-01 | -0.17 | 4.02E-01 |
| <b>G16043</b>        | -0.12 | 5.52E-01 | 0.17  | 4.02E-01 |
| <b>G39661</b>        | -0.19 | 3.36E-01 | -0.17 | 4.02E-01 |
| <b>G8340</b>         | -0.09 | 6.65E-01 | -0.17 | 4.02E-01 |
| <b>GPR1</b>          | 0.29  | 1.40E-01 | 0.17  | 4.02E-01 |
| <b>HAUS6</b>         | 0.16  | 4.28E-01 | -0.17 | 4.02E-01 |
| <b>HTR2A</b>         | 0.09  | 6.34E-01 | 0.17  | 4.02E-01 |
| <b>IGFBP5</b>        | -0.18 | 3.64E-01 | 0.17  | 4.02E-01 |
| <b>INAFM2</b>        | 0.05  | 8.05E-01 | 0.17  | 4.02E-01 |
| <b>KRT43P</b>        | -0.30 | 1.27E-01 | -0.17 | 4.02E-01 |
| <b>MEGF6</b>         | -0.21 | 2.87E-01 | -0.17 | 4.02E-01 |
| <b>MFSD11</b>        | 0.13  | 5.12E-01 | 0.17  | 4.02E-01 |
| <b>POM121B</b>       | -0.03 | 8.70E-01 | -0.17 | 4.02E-01 |
| <b>RP11-307P5.1</b>  | -0.18 | 3.53E-01 | 0.17  | 4.02E-01 |
| <b>RP11-313D6.3</b>  | -0.23 | 2.32E-01 | -0.17 | 4.02E-01 |
| <b>RP11-416A14.1</b> | -0.13 | 5.20E-01 | -0.17 | 4.02E-01 |
| <b>RP5-1037N22.2</b> | 0.09  | 6.32E-01 | -0.17 | 4.02E-01 |
| <b>RP5-1132H15.3</b> | -0.13 | 5.05E-01 | -0.17 | 4.02E-01 |
| <b>RP5-1171I10.5</b> | 0.06  | 7.72E-01 | 0.17  | 4.02E-01 |
| <b>SDHAF1</b>        | 0.14  | 4.92E-01 | -0.17 | 4.02E-01 |
| <b>TCEAL8</b>        | -0.02 | 9.11E-01 | -0.17 | 4.02E-01 |
| <b>TEX29</b>         | 0.08  | 6.99E-01 | -0.17 | 4.02E-01 |
| <b>TSPYL6</b>        | -0.07 | 7.28E-01 | -0.17 | 4.02E-01 |
| <b>XLOC_012841</b>   | -0.16 | 4.23E-01 | -0.17 | 4.02E-01 |
| <b>ZNF106</b>        | -0.13 | 5.17E-01 | -0.17 | 4.02E-01 |
| <b>ZNF534</b>        | -0.15 | 4.44E-01 | -0.17 | 4.02E-01 |
| <b>ABI3BP</b>        | -0.41 | 3.15E-02 | -0.17 | 4.03E-01 |
| <b>APP</b>           | 0.04  | 8.36E-01 | 0.17  | 4.03E-01 |
| <b>CSTA</b>          | 0.19  | 3.32E-01 | 0.17  | 4.03E-01 |
| <b>CTD-2337I7.1</b>  | 0.04  | 8.40E-01 | 0.17  | 4.03E-01 |
| <b>CXCR4</b>         | 0.44  | 1.82E-02 | 0.17  | 4.03E-01 |
| <b>HCG16</b>         | 0.07  | 7.38E-01 | -0.17 | 4.03E-01 |
| <b>MALL</b>          | 0.27  | 1.67E-01 | 0.17  | 4.03E-01 |
| <b>NME8</b>          | 0.06  | 7.69E-01 | -0.17 | 4.03E-01 |
| <b>PEX12</b>         | 0.05  | 7.91E-01 | -0.17 | 4.03E-01 |



|               |       |          |       |          |
|---------------|-------|----------|-------|----------|
| RP11-113A11.1 | -0.04 | 8.42E-01 | -0.17 | 4.03E-01 |
| RP11-180M15.6 | -0.20 | 3.12E-01 | -0.17 | 4.03E-01 |
| RP11-332H18.7 | 0.28  | 1.42E-01 | 0.17  | 4.03E-01 |
| RP11-338K17.6 | 0.20  | 3.17E-01 | -0.17 | 4.03E-01 |
| RP11-686G8.2  | -0.13 | 5.08E-01 | 0.17  | 4.03E-01 |
| RP11-792A8.3  | -0.05 | 8.14E-01 | -0.17 | 4.03E-01 |
| SEC24B        | -0.10 | 6.05E-01 | -0.17 | 4.03E-01 |
| TADA2B        | 0.17  | 3.76E-01 | 0.17  | 4.03E-01 |
| TMLHE-AS1     | -0.45 | 1.55E-02 | -0.17 | 4.03E-01 |
| BACE2         | -0.28 | 1.48E-01 | -0.17 | 4.04E-01 |
| C2CD5         | -0.10 | 6.04E-01 | -0.17 | 4.04E-01 |
| CTD-2647L4.4  | -0.13 | 5.25E-01 | -0.17 | 4.04E-01 |
| FLJ31104      | 0.16  | 4.24E-01 | -0.17 | 4.04E-01 |
| G30853        | -0.31 | 1.12E-01 | -0.17 | 4.04E-01 |
| HNRNPH3       | -0.31 | 1.08E-01 | -0.17 | 4.04E-01 |
| MDFIC         | -0.16 | 4.15E-01 | -0.17 | 4.04E-01 |
| NCAPH2        | 0.03  | 8.94E-01 | -0.17 | 4.04E-01 |
| PDCD10        | -0.03 | 8.78E-01 | -0.17 | 4.04E-01 |
| RHEBP3        | -0.11 | 5.72E-01 | -0.17 | 4.04E-01 |
| RP1-168L15.6  | 0.05  | 8.19E-01 | -0.17 | 4.04E-01 |
| RP1-278O22.2  | -0.23 | 2.33E-01 | -0.17 | 4.04E-01 |
| RP11-356K23.2 | -0.50 | 6.75E-03 | -0.17 | 4.04E-01 |
| RP11-430H12.2 | -0.29 | 1.42E-01 | -0.17 | 4.04E-01 |
| SEPW1         | -0.25 | 2.06E-01 | -0.17 | 4.04E-01 |
| SFRP5         | -0.21 | 2.90E-01 | -0.17 | 4.04E-01 |
| SNORD53       | -0.16 | 4.16E-01 | -0.17 | 4.04E-01 |
| XIAP          | 0.24  | 2.27E-01 | -0.17 | 4.04E-01 |
| AC010886.2    | -0.27 | 1.64E-01 | 0.17  | 4.04E-01 |
| AC114296.1    | -0.21 | 2.86E-01 | 0.17  | 4.04E-01 |
| ACPP          | 0.22  | 2.63E-01 | 0.17  | 4.04E-01 |
| BTBD6         | 0.13  | 5.15E-01 | 0.17  | 4.04E-01 |
| GLMN          | 0.29  | 1.37E-01 | 0.17  | 4.04E-01 |
| PRCC          | 0.15  | 4.49E-01 | 0.17  | 4.04E-01 |
| PSEN2         | -0.11 | 5.92E-01 | 0.17  | 4.04E-01 |
| RHOF          | -0.10 | 6.13E-01 | 0.17  | 4.04E-01 |
| RP11-429D19.1 | 0.21  | 2.73E-01 | 0.17  | 4.04E-01 |
| RP3-521E19.3  | -0.28 | 1.43E-01 | 0.17  | 4.04E-01 |
| RPS28P7       | -0.26 | 1.79E-01 | 0.17  | 4.04E-01 |
| TMEM25        | -0.19 | 3.22E-01 | 0.17  | 4.04E-01 |
| UNC5B         | 0.39  | 3.98E-02 | 0.17  | 4.04E-01 |
| VCAM1         | -0.05 | 8.10E-01 | 0.17  | 4.04E-01 |
| ZAN           | 0.02  | 9.16E-01 | 0.17  | 4.04E-01 |
| ATP6V0E2      | 0.18  | 3.63E-01 | -0.17 | 4.05E-01 |
| CD244         | 0.43  | 2.16E-02 | 0.17  | 4.05E-01 |
| DCDC1         | -0.04 | 8.30E-01 | -0.17 | 4.05E-01 |
| ELP2          | -0.11 | 5.93E-01 | -0.17 | 4.05E-01 |
| HMGB1P5       | -0.03 | 8.78E-01 | -0.17 | 4.05E-01 |

|               |       |          |       |          |
|---------------|-------|----------|-------|----------|
| KIAA0125      | 0.36  | 6.35E-02 | -0.17 | 4.05E-01 |
| LIN37         | -0.26 | 1.78E-01 | -0.17 | 4.05E-01 |
| LY6K          | 0.17  | 3.85E-01 | 0.17  | 4.05E-01 |
| MMS19         | -0.02 | 9.35E-01 | 0.17  | 4.05E-01 |
| MRC1          | 0.18  | 3.72E-01 | 0.17  | 4.05E-01 |
| PRPS2         | 0.02  | 9.02E-01 | -0.17 | 4.05E-01 |
| PTPN9         | 0.00  | 9.86E-01 | 0.17  | 4.05E-01 |
| PYGM          | 0.03  | 8.86E-01 | -0.17 | 4.05E-01 |
| RP11-14I17.3  | -0.15 | 4.53E-01 | -0.17 | 4.05E-01 |
| RP11-211G23.2 | -0.11 | 5.69E-01 | -0.17 | 4.05E-01 |
| RP11-599B13.7 | 0.31  | 1.10E-01 | -0.17 | 4.05E-01 |
| RPL5P18       | -0.35 | 7.12E-02 | 0.17  | 4.05E-01 |
| SNORD111      | 0.17  | 3.83E-01 | -0.17 | 4.05E-01 |
| SRRM1         | -0.18 | 3.62E-01 | -0.17 | 4.05E-01 |
| STAG3L2       | -0.22 | 2.67E-01 | -0.17 | 4.05E-01 |
| STARD7        | 0.17  | 3.88E-01 | -0.17 | 4.05E-01 |
| TRAJ12        | 0.08  | 6.90E-01 | -0.17 | 4.05E-01 |
| TRIM22        | 0.34  | 7.97E-02 | 0.17  | 4.05E-01 |
| ZKSCAN4       | -0.05 | 8.08E-01 | -0.17 | 4.05E-01 |
| ATP6V0A4      | -0.04 | 8.31E-01 | -0.17 | 4.06E-01 |
| BHLHE40-AS1   | 0.01  | 9.79E-01 | 0.17  | 4.06E-01 |
| CDC27         | 0.17  | 4.00E-01 | 0.17  | 4.06E-01 |
| COX7A1        | -0.19 | 3.39E-01 | -0.17 | 4.06E-01 |
| CTD-2012K14.7 | 0.02  | 9.15E-01 | -0.17 | 4.06E-01 |
| DNAJC9-AS1    | -0.17 | 3.99E-01 | 0.17  | 4.06E-01 |
| FAM72C        | -0.05 | 7.91E-01 | -0.17 | 4.06E-01 |
| GJB5          | -0.17 | 3.83E-01 | -0.17 | 4.06E-01 |
| HLA-DOB       | 0.06  | 7.50E-01 | 0.17  | 4.06E-01 |
| MANSC1        | 0.38  | 4.44E-02 | 0.17  | 4.06E-01 |
| QARS          | 0.03  | 8.87E-01 | 0.17  | 4.06E-01 |
| RP11-254F19.2 | -0.07 | 7.29E-01 | 0.17  | 4.06E-01 |
| RP11-44N11.3  | 0.19  | 3.22E-01 | 0.17  | 4.06E-01 |
| RP11-619A14.3 | 0.05  | 8.18E-01 | 0.17  | 4.06E-01 |
| RP11-61E11.2  | -0.09 | 6.57E-01 | -0.17 | 4.06E-01 |
| TMEM184B      | 0.36  | 5.78E-02 | 0.17  | 4.06E-01 |
| WDR36         | 0.25  | 2.02E-01 | -0.17 | 4.06E-01 |
| CLN5          | 0.14  | 4.86E-01 | -0.17 | 4.07E-01 |
| LDHAP3        | 0.15  | 4.60E-01 | -0.17 | 4.07E-01 |
| RP11-17P16.2  | 0.02  | 9.17E-01 | -0.17 | 4.07E-01 |
| RP11-578O24.2 | 0.35  | 6.64E-02 | -0.17 | 4.07E-01 |
| RP11-83M16.3  | -0.08 | 6.98E-01 | -0.17 | 4.07E-01 |
| RP11-97C16.1  | -0.04 | 8.32E-01 | -0.17 | 4.07E-01 |
| RP4-671O14.6  | -0.22 | 2.60E-01 | -0.17 | 4.07E-01 |
| SLC27A6       | 0.05  | 7.86E-01 | -0.17 | 4.07E-01 |
| XLOC_014272   | 0.01  | 9.54E-01 | -0.17 | 4.07E-01 |
| ARFGAP1       | -0.12 | 5.46E-01 | 0.17  | 4.07E-01 |
| CFB           | 0.11  | 5.92E-01 | 0.17  | 4.07E-01 |

|               |       |          |       |          |
|---------------|-------|----------|-------|----------|
| ERC2          | 0.26  | 1.87E-01 | 0.17  | 4.07E-01 |
| PRDX5         | 0.08  | 6.85E-01 | 0.17  | 4.07E-01 |
| RP11-554D15.3 | -0.29 | 1.34E-01 | 0.17  | 4.07E-01 |
| RP11-715J22.4 | -0.03 | 8.82E-01 | 0.17  | 4.07E-01 |
| RP11-823P9.3  | -0.36 | 5.80E-02 | 0.17  | 4.07E-01 |
| SLC25A10      | 0.44  | 2.04E-02 | 0.17  | 4.07E-01 |
| TBC1D10B      | 0.36  | 5.92E-02 | 0.17  | 4.07E-01 |
| WSCD2         | 0.03  | 8.90E-01 | 0.17  | 4.07E-01 |
| XLOC_010336   | -0.16 | 4.14E-01 | 0.17  | 4.07E-01 |
| AC004510.3    | -0.23 | 2.45E-01 | -0.17 | 4.07E-01 |
| AC011239.2    | 0.19  | 3.39E-01 | -0.17 | 4.07E-01 |
| AC025918.2    | -0.20 | 3.15E-01 | -0.17 | 4.07E-01 |
| BEST3         | 0.21  | 2.80E-01 | -0.17 | 4.07E-01 |
| CDYL          | -0.07 | 7.37E-01 | 0.17  | 4.07E-01 |
| CTD-2376I4.2  | -0.07 | 7.11E-01 | 0.17  | 4.07E-01 |
| FAM69C        | -0.24 | 2.27E-01 | -0.17 | 4.07E-01 |
| GCLM          | 0.37  | 4.98E-02 | -0.17 | 4.07E-01 |
| HDGF          | 0.16  | 4.12E-01 | -0.17 | 4.07E-01 |
| KBTBD7        | 0.01  | 9.67E-01 | 0.17  | 4.07E-01 |
| KCNK2         | -0.01 | 9.63E-01 | -0.17 | 4.07E-01 |
| KLHL12        | 0.14  | 4.89E-01 | 0.17  | 4.07E-01 |
| LINC01560     | -0.08 | 6.74E-01 | 0.17  | 4.07E-01 |
| PREPL         | -0.18 | 3.53E-01 | -0.17 | 4.07E-01 |
| PRPF39        | -0.10 | 6.03E-01 | -0.17 | 4.07E-01 |
| PVRL3-AS1     | -0.14 | 4.73E-01 | -0.17 | 4.07E-01 |
| RBM39         | -0.10 | 5.95E-01 | -0.17 | 4.07E-01 |
| RNU2-25P      | -0.17 | 3.86E-01 | -0.17 | 4.07E-01 |
| RP11-262H14.5 | 0.18  | 3.53E-01 | 0.17  | 4.07E-01 |
| RP11-30B1.1   | -0.39 | 4.10E-02 | -0.17 | 4.07E-01 |
| RP11-352D13.6 | 0.06  | 7.48E-01 | 0.17  | 4.07E-01 |
| RP11-519G16.5 | 0.14  | 4.64E-01 | 0.17  | 4.07E-01 |
| RP5-994D16.3  | -0.06 | 7.55E-01 | -0.17 | 4.07E-01 |
| SERTAD2       | -0.37 | 5.44E-02 | -0.17 | 4.07E-01 |
| SPAG17        | 0.30  | 1.15E-01 | -0.17 | 4.07E-01 |
| TSPAN31       | 0.26  | 1.78E-01 | 0.17  | 4.07E-01 |
| ZNF79         | 0.17  | 3.82E-01 | 0.17  | 4.07E-01 |
| AC023271.1    | 0.05  | 8.19E-01 | -0.17 | 4.08E-01 |
| AP000648.5    | -0.16 | 4.22E-01 | -0.17 | 4.08E-01 |
| AP3S2         | -0.07 | 7.19E-01 | 0.17  | 4.08E-01 |
| CBLN4         | 0.01  | 9.59E-01 | -0.17 | 4.08E-01 |
| CLIC1         | -0.08 | 6.73E-01 | -0.17 | 4.08E-01 |
| DPH5          | -0.02 | 9.23E-01 | 0.17  | 4.08E-01 |
| FUT6          | 0.16  | 4.24E-01 | -0.17 | 4.08E-01 |
| HNRNP1P1      | -0.32 | 9.81E-02 | -0.17 | 4.08E-01 |
| KIF9          | -0.15 | 4.31E-01 | -0.17 | 4.08E-01 |
| LINC00623     | -0.24 | 2.10E-01 | 0.17  | 4.08E-01 |
| MTF2          | 0.06  | 7.50E-01 | -0.17 | 4.08E-01 |

|                |       |          |       |          |
|----------------|-------|----------|-------|----------|
| NCSTN          | 0.05  | 8.11E-01 | 0.17  | 4.08E-01 |
| NPDC1          | 0.13  | 5.13E-01 | -0.17 | 4.08E-01 |
| PAQR8          | -0.21 | 2.91E-01 | -0.17 | 4.08E-01 |
| PFN1P1         | 0.09  | 6.40E-01 | 0.17  | 4.08E-01 |
| PPP6R2         | 0.05  | 8.14E-01 | 0.17  | 4.08E-01 |
| RAC1           | 0.13  | 5.11E-01 | 0.17  | 4.08E-01 |
| RAP1AP         | -0.08 | 7.03E-01 | -0.17 | 4.08E-01 |
| RAPH1          | -0.10 | 6.29E-01 | -0.17 | 4.08E-01 |
| RP11-16P20.3   | 0.00  | 9.80E-01 | -0.17 | 4.08E-01 |
| RP11-173P15.7  | 0.35  | 6.77E-02 | -0.17 | 4.08E-01 |
| RP11-272L13.4  | 0.05  | 7.91E-01 | 0.17  | 4.08E-01 |
| RP11-462D18.2  | -0.21 | 2.85E-01 | 0.17  | 4.08E-01 |
| RP11-498C9.4   | -0.11 | 5.72E-01 | -0.17 | 4.08E-01 |
| RP11-64B16.2   | -0.09 | 6.43E-01 | -0.17 | 4.08E-01 |
| RP11-802O23.4  | -0.07 | 7.26E-01 | 0.17  | 4.08E-01 |
| RP11-809N15.2  | 0.07  | 7.38E-01 | -0.17 | 4.08E-01 |
| RPL12P29       | -0.04 | 8.49E-01 | -0.17 | 4.08E-01 |
| RPL17P40       | 0.03  | 8.70E-01 | 0.17  | 4.08E-01 |
| RPS3P2         | -0.16 | 4.10E-01 | 0.17  | 4.08E-01 |
| SLC35A1        | 0.08  | 6.94E-01 | -0.17 | 4.08E-01 |
| SNHG14         | -0.17 | 3.74E-01 | -0.17 | 4.08E-01 |
| SNORD41        | 0.07  | 7.31E-01 | -0.17 | 4.08E-01 |
| TUBG1          | 0.24  | 2.19E-01 | 0.17  | 4.08E-01 |
| WI2-87327B8.2  | -0.05 | 8.10E-01 | 0.17  | 4.08E-01 |
| AC007563.5     | -0.19 | 3.40E-01 | -0.17 | 4.09E-01 |
| AC008280.1     | -0.16 | 4.25E-01 | -0.17 | 4.09E-01 |
| ARL6           | 0.03  | 8.73E-01 | -0.17 | 4.09E-01 |
| CREB5          | -0.40 | 3.60E-02 | -0.17 | 4.09E-01 |
| CTA-253N17.1   | -0.01 | 9.45E-01 | 0.17  | 4.09E-01 |
| CTD-2158P22.1  | 0.46  | 1.37E-02 | 0.17  | 4.09E-01 |
| CTD-2571L23.8  | 0.31  | 1.03E-01 | -0.17 | 4.09E-01 |
| DDX19B         | 0.16  | 4.16E-01 | -0.17 | 4.09E-01 |
| DNAJC15        | 0.12  | 5.52E-01 | 0.17  | 4.09E-01 |
| GPRC5C         | -0.04 | 8.29E-01 | 0.17  | 4.09E-01 |
| HSPA2          | 0.01  | 9.79E-01 | -0.17 | 4.09E-01 |
| NR2F2          | -0.24 | 2.22E-01 | 0.17  | 4.09E-01 |
| PRR9           | 0.28  | 1.44E-01 | 0.17  | 4.09E-01 |
| RN7SKP69       | 0.30  | 1.23E-01 | -0.17 | 4.09E-01 |
| RNH1           | -0.01 | 9.44E-01 | 0.17  | 4.09E-01 |
| RNU7-91P       | -0.16 | 4.07E-01 | -0.17 | 4.09E-01 |
| RP11-155D18.13 | 0.17  | 3.96E-01 | 0.17  | 4.09E-01 |
| RP11-227L6.1   | -0.11 | 5.70E-01 | 0.17  | 4.09E-01 |
| RP11-554A11.4  | 0.06  | 7.62E-01 | 0.17  | 4.09E-01 |
| TRIM33         | 0.07  | 7.18E-01 | -0.17 | 4.09E-01 |
| TXNDC17        | 0.21  | 2.78E-01 | 0.17  | 4.09E-01 |
| ZNF669         | -0.03 | 8.69E-01 | -0.17 | 4.09E-01 |
| AP000662.4     | -0.16 | 4.21E-01 | 0.17  | 4.10E-01 |

|               |       |          |       |          |
|---------------|-------|----------|-------|----------|
| ATF2          | 0.14  | 4.91E-01 | 0.17  | 4.10E-01 |
| C3orf20       | -0.22 | 2.59E-01 | -0.17 | 4.10E-01 |
| CASP1P2       | 0.28  | 1.56E-01 | -0.17 | 4.10E-01 |
| CUEDC1        | -0.21 | 2.95E-01 | 0.17  | 4.10E-01 |
| ECHDC1        | 0.27  | 1.63E-01 | 0.17  | 4.10E-01 |
| IGF2BP2       | -0.32 | 9.50E-02 | -0.17 | 4.10E-01 |
| IL31RA        | -0.07 | 7.19E-01 | -0.17 | 4.10E-01 |
| KB-1572G7.3   | 0.22  | 2.71E-01 | 0.17  | 4.10E-01 |
| LAMP1         | 0.20  | 3.17E-01 | 0.17  | 4.10E-01 |
| MAL2          | 0.01  | 9.69E-01 | -0.17 | 4.10E-01 |
| MIR1537       | 0.06  | 7.51E-01 | -0.17 | 4.10E-01 |
| NGRN          | -0.12 | 5.28E-01 | -0.17 | 4.10E-01 |
| ORMDL3        | -0.11 | 5.85E-01 | 0.17  | 4.10E-01 |
| PBX2P1        | -0.28 | 1.42E-01 | 0.17  | 4.10E-01 |
| PEBP1P2       | -0.14 | 4.72E-01 | 0.17  | 4.10E-01 |
| PIK3R3        | 0.18  | 3.52E-01 | 0.17  | 4.10E-01 |
| RAB28P2       | -0.04 | 8.27E-01 | -0.17 | 4.10E-01 |
| RNU6-199P     | 0.17  | 3.73E-01 | 0.17  | 4.10E-01 |
| RP11-383J24.2 | 0.07  | 7.10E-01 | -0.17 | 4.10E-01 |
| RP11-390K5.1  | -0.08 | 6.83E-01 | -0.17 | 4.10E-01 |
| RP11-517O13.3 | -0.25 | 2.06E-01 | -0.17 | 4.10E-01 |
| RP11-528A10.1 | -0.14 | 4.79E-01 | 0.17  | 4.10E-01 |
| RP11-565J7.1  | -0.20 | 3.09E-01 | -0.17 | 4.10E-01 |
| RP11-64D24.2  | 0.17  | 3.85E-01 | -0.17 | 4.10E-01 |
| RP5-1092A3.4  | -0.35 | 7.17E-02 | 0.17  | 4.10E-01 |
| RP5-850O15.3  | -0.15 | 4.44E-01 | -0.17 | 4.10E-01 |
| SDHC          | 0.18  | 3.66E-01 | 0.17  | 4.10E-01 |
| XBP1P1        | -0.19 | 3.20E-01 | -0.17 | 4.10E-01 |
| ZNF667-AS1    | -0.18 | 3.69E-01 | -0.17 | 4.10E-01 |
| ACADM         | 0.21  | 2.92E-01 | -0.16 | 4.11E-01 |
| AL031594.1    | -0.32 | 1.02E-01 | -0.16 | 4.11E-01 |
| CARS          | 0.10  | 6.31E-01 | 0.16  | 4.11E-01 |
| CKAP4         | 0.38  | 4.73E-02 | 0.16  | 4.11E-01 |
| CYP2B6        | -0.15 | 4.49E-01 | -0.16 | 4.11E-01 |
| G27544        | 0.27  | 1.60E-01 | 0.16  | 4.11E-01 |
| G7666         | -0.06 | 7.72E-01 | -0.16 | 4.11E-01 |
| GID8          | 0.22  | 2.55E-01 | 0.16  | 4.11E-01 |
| MIR545        | 0.17  | 3.74E-01 | -0.16 | 4.11E-01 |
| NOP2          | 0.15  | 4.54E-01 | 0.16  | 4.11E-01 |
| OS9           | 0.03  | 8.95E-01 | 0.16  | 4.11E-01 |
| PPP1R14D      | 0.15  | 4.45E-01 | -0.16 | 4.11E-01 |
| PTER          | -0.02 | 9.31E-01 | 0.16  | 4.11E-01 |
| RN7SL821P     | 0.00  | 9.86E-01 | -0.16 | 4.11E-01 |
| RNU6-733P     | 0.14  | 4.82E-01 | -0.16 | 4.11E-01 |
| RP11-154D6.1  | -0.03 | 8.79E-01 | -0.16 | 4.11E-01 |
| RP11-66B24.9  | 0.13  | 5.00E-01 | 0.16  | 4.11E-01 |
| RP11-671J11.5 | 0.06  | 7.43E-01 | -0.16 | 4.11E-01 |

|                |       |          |       |          |
|----------------|-------|----------|-------|----------|
| RP11-760H22.2  | 0.09  | 6.36E-01 | 0.16  | 4.11E-01 |
| RP3-471C18.2   | 0.21  | 2.87E-01 | -0.16 | 4.11E-01 |
| RP5-981O7.2    | -0.11 | 5.87E-01 | -0.16 | 4.11E-01 |
| TDRD7          | 0.20  | 2.96E-01 | 0.16  | 4.11E-01 |
| TPTE2P5        | -0.15 | 4.44E-01 | -0.16 | 4.11E-01 |
| TRIM41         | -0.04 | 8.25E-01 | 0.16  | 4.11E-01 |
| WBSCR17        | -0.07 | 7.06E-01 | 0.16  | 4.11E-01 |
| XLOC_002897    | -0.35 | 6.52E-02 | -0.16 | 4.11E-01 |
| XLOC_014276    | -0.07 | 7.21E-01 | -0.16 | 4.11E-01 |
| ZNF212         | -0.04 | 8.35E-01 | 0.16  | 4.11E-01 |
| ZNF586         | 0.11  | 5.77E-01 | 0.16  | 4.11E-01 |
| AC009495.3     | 0.20  | 3.20E-01 | -0.16 | 4.12E-01 |
| CKM            | 0.34  | 7.54E-02 | -0.16 | 4.12E-01 |
| CTA-268H5.12   | -0.17 | 3.82E-01 | -0.16 | 4.12E-01 |
| EGLN3          | 0.13  | 5.03E-01 | 0.16  | 4.12E-01 |
| FBXO42         | 0.04  | 8.22E-01 | 0.16  | 4.12E-01 |
| GLB1L          | 0.12  | 5.36E-01 | 0.16  | 4.12E-01 |
| ING3           | -0.07 | 7.15E-01 | -0.16 | 4.12E-01 |
| LIMD2          | 0.28  | 1.53E-01 | 0.16  | 4.12E-01 |
| NUCB1          | 0.25  | 2.05E-01 | 0.16  | 4.12E-01 |
| PSMB8          | 0.07  | 7.38E-01 | 0.16  | 4.12E-01 |
| RAG1           | 0.31  | 1.07E-01 | 0.16  | 4.12E-01 |
| RARRES2        | 0.02  | 9.02E-01 | -0.16 | 4.12E-01 |
| RNA5SP233      | 0.05  | 8.18E-01 | -0.16 | 4.12E-01 |
| RP11-718B12.2  | -0.01 | 9.42E-01 | -0.16 | 4.12E-01 |
| RP11-848P1.5   | -0.11 | 5.60E-01 | -0.16 | 4.12E-01 |
| RPL13AP7       | 0.15  | 4.61E-01 | 0.16  | 4.12E-01 |
| SMARCAD1       | 0.08  | 6.79E-01 | 0.16  | 4.12E-01 |
| TMED5          | 0.16  | 4.26E-01 | -0.16 | 4.12E-01 |
| ZNF701         | 0.16  | 4.12E-01 | -0.16 | 4.12E-01 |
| ZYX            | 0.13  | 5.21E-01 | 0.16  | 4.12E-01 |
| AP000688.1     | 0.49  | 8.44E-03 | -0.16 | 4.13E-01 |
| ART5           | -0.12 | 5.36E-01 | -0.16 | 4.13E-01 |
| CRIPAK         | 0.07  | 7.07E-01 | 0.16  | 4.13E-01 |
| EPHA8          | 0.25  | 2.02E-01 | 0.16  | 4.13E-01 |
| FIBCD1         | -0.11 | 5.74E-01 | 0.16  | 4.13E-01 |
| LINC00174      | -0.28 | 1.48E-01 | 0.16  | 4.13E-01 |
| NR2C2          | -0.05 | 8.14E-01 | -0.16 | 4.13E-01 |
| NSL1           | 0.06  | 7.66E-01 | 0.16  | 4.13E-01 |
| NUDT2          | 0.21  | 2.72E-01 | 0.16  | 4.13E-01 |
| PAXIP1         | 0.03  | 8.97E-01 | -0.16 | 4.13E-01 |
| RP11-259O2.1   | -0.27 | 1.63E-01 | -0.16 | 4.13E-01 |
| RP11-378A13.1  | -0.15 | 4.60E-01 | 0.16  | 4.13E-01 |
| RP11-539E19.2  | -0.22 | 2.68E-01 | 0.16  | 4.13E-01 |
| RP11-713M15.1  | -0.25 | 2.04E-01 | -0.16 | 4.13E-01 |
| TMEM256-PLSCR3 | 0.39  | 4.23E-02 | 0.16  | 4.13E-01 |
| CHPF2          | 0.14  | 4.64E-01 | 0.16  | 4.14E-01 |

|                      |       |          |       |          |
|----------------------|-------|----------|-------|----------|
| <b>CTC-325H20.8</b>  | -0.18 | 3.64E-01 | -0.16 | 4.14E-01 |
| <b>CTD-2293H3.2</b>  | -0.15 | 4.49E-01 | -0.16 | 4.14E-01 |
| <b>DNAJB4</b>        | -0.20 | 3.00E-01 | -0.16 | 4.14E-01 |
| <b>KB-1991G8.1</b>   | -0.29 | 1.29E-01 | -0.16 | 4.14E-01 |
| <b>LPXN</b>          | 0.21  | 2.76E-01 | 0.16  | 4.14E-01 |
| <b>MIR23B</b>        | -0.04 | 8.28E-01 | 0.16  | 4.14E-01 |
| <b>RN7SL138P</b>     | 0.08  | 6.96E-01 | 0.16  | 4.14E-01 |
| <b>RP11-111F16.2</b> | -0.17 | 3.81E-01 | -0.16 | 4.14E-01 |
| <b>RP11-1129I3.1</b> | -0.19 | 3.37E-01 | -0.16 | 4.14E-01 |
| <b>RP11-454F8.2</b>  | -0.11 | 5.90E-01 | -0.16 | 4.14E-01 |
| <b>RP11-572O6.1</b>  | 0.07  | 7.28E-01 | -0.16 | 4.14E-01 |
| <b>RP11-62F24.1</b>  | 0.06  | 7.43E-01 | 0.16  | 4.14E-01 |
| <b>RP11-731J8.1</b>  | 0.02  | 9.03E-01 | -0.16 | 4.14E-01 |
| <b>RP3-395M20.8</b>  | 0.08  | 6.74E-01 | 0.16  | 4.14E-01 |
| <b>SCARNA8</b>       | -0.06 | 7.54E-01 | 0.16  | 4.14E-01 |
| <b>SFR1P1</b>        | -0.26 | 1.75E-01 | -0.16 | 4.14E-01 |
| <b>SLC16A2</b>       | -0.13 | 4.97E-01 | -0.16 | 4.14E-01 |
| <b>SZRD1</b>         | 0.15  | 4.42E-01 | 0.16  | 4.14E-01 |
| <b>TCP10L</b>        | 0.05  | 8.03E-01 | 0.16  | 4.14E-01 |
| <b>UTS2B</b>         | -0.29 | 1.30E-01 | 0.16  | 4.14E-01 |
| <b>AC142472.6</b>    | -0.03 | 8.77E-01 | -0.16 | 4.15E-01 |
| <b>ADGRF3</b>        | 0.21  | 2.94E-01 | -0.16 | 4.15E-01 |
| <b>ALKBH3-AS1</b>    | -0.20 | 3.12E-01 | -0.16 | 4.15E-01 |
| <b>CLEC1A</b>        | 0.11  | 5.63E-01 | 0.16  | 4.15E-01 |
| <b>CTC-429P9.2</b>   | 0.03  | 8.68E-01 | -0.16 | 4.15E-01 |
| <b>FSCN1</b>         | 0.13  | 5.09E-01 | 0.16  | 4.15E-01 |
| <b>HDAC5</b>         | -0.20 | 3.07E-01 | 0.16  | 4.15E-01 |
| <b>KB-1458E12.1</b>  | -0.12 | 5.47E-01 | -0.16 | 4.15E-01 |
| <b>KCNMB3</b>        | -0.24 | 2.21E-01 | 0.16  | 4.15E-01 |
| <b>LINC01547</b>     | 0.19  | 3.23E-01 | 0.16  | 4.15E-01 |
| <b>LIPA</b>          | 0.38  | 4.92E-02 | 0.16  | 4.15E-01 |
| <b>MMEL1</b>         | 0.40  | 3.45E-02 | -0.16 | 4.15E-01 |
| <b>PCDH12</b>        | 0.28  | 1.48E-01 | -0.16 | 4.15E-01 |
| <b>RNA5SP492</b>     | 0.01  | 9.70E-01 | -0.16 | 4.15E-01 |
| <b>RP11-166D19.1</b> | -0.10 | 6.20E-01 | -0.16 | 4.15E-01 |
| <b>RP11-415F23.3</b> | 0.08  | 6.96E-01 | -0.16 | 4.15E-01 |
| <b>RP11-488P3.1</b>  | -0.11 | 5.93E-01 | -0.16 | 4.15E-01 |
| <b>RP11-85I17.2</b>  | -0.01 | 9.54E-01 | -0.16 | 4.15E-01 |
| <b>RP4-800J21.3</b>  | 0.06  | 7.46E-01 | 0.16  | 4.15E-01 |
| <b>RPL7AP30</b>      | -0.18 | 3.52E-01 | 0.16  | 4.15E-01 |
| <b>SNORA51</b>       | 0.03  | 8.62E-01 | 0.16  | 4.15E-01 |
| <b>AC068580.5</b>    | -0.14 | 4.92E-01 | -0.16 | 4.15E-01 |
| <b>ACSS1</b>         | -0.20 | 3.00E-01 | 0.16  | 4.15E-01 |
| <b>ADAM17</b>        | 0.29  | 1.36E-01 | 0.16  | 4.15E-01 |
| <b>CTD-2201I18.1</b> | 0.00  | 9.83E-01 | -0.16 | 4.15E-01 |
| <b>CTXN1</b>         | -0.05 | 8.10E-01 | 0.16  | 4.15E-01 |
| <b>GCNT7</b>         | -0.19 | 3.36E-01 | 0.16  | 4.15E-01 |

|                       |       |          |       |          |
|-----------------------|-------|----------|-------|----------|
| <b>GFI1B</b>          | -0.23 | 2.47E-01 | -0.16 | 4.15E-01 |
| <b>GIPC2</b>          | -0.29 | 1.38E-01 | -0.16 | 4.15E-01 |
| <b>GTF2IP4</b>        | 0.22  | 2.51E-01 | -0.16 | 4.15E-01 |
| <b>LCE2C</b>          | 0.01  | 9.43E-01 | 0.16  | 4.15E-01 |
| <b>LIMS1-AS1</b>      | 0.03  | 8.63E-01 | -0.16 | 4.15E-01 |
| <b>MIR200B</b>        | -0.06 | 7.69E-01 | -0.16 | 4.15E-01 |
| <b>NFKBIZ</b>         | 0.28  | 1.43E-01 | 0.16  | 4.15E-01 |
| <b>PDE4B</b>          | -0.15 | 4.37E-01 | 0.16  | 4.15E-01 |
| <b>PITPNM2</b>        | -0.06 | 7.47E-01 | -0.16 | 4.15E-01 |
| <b>PSMD4</b>          | 0.07  | 7.15E-01 | 0.16  | 4.15E-01 |
| <b>RNA5SP44</b>       | 0.17  | 3.86E-01 | -0.16 | 4.15E-01 |
| <b>RP1-137K2.2</b>    | -0.08 | 6.99E-01 | 0.16  | 4.15E-01 |
| <b>RP11-113K21.1</b>  | 0.05  | 8.15E-01 | 0.16  | 4.15E-01 |
| <b>RP11-145E17.2</b>  | -0.03 | 8.80E-01 | -0.16 | 4.15E-01 |
| <b>RP11-154D17.1</b>  | -0.45 | 1.65E-02 | 0.16  | 4.15E-01 |
| <b>RP11-245J9.5</b>   | -0.02 | 9.12E-01 | -0.16 | 4.15E-01 |
| <b>RP11-458J1.1</b>   | 0.53  | 3.72E-03 | 0.16  | 4.15E-01 |
| <b>RP11-863K10.4</b>  | -0.02 | 9.06E-01 | 0.16  | 4.15E-01 |
| <b>RP13-1056D16.2</b> | -0.15 | 4.56E-01 | -0.16 | 4.15E-01 |
| <b>RP3-497J21.1</b>   | 0.08  | 6.92E-01 | 0.16  | 4.15E-01 |
| <b>RPL18AP3</b>       | 0.24  | 2.14E-01 | 0.16  | 4.15E-01 |
| <b>SLC7A4</b>         | 0.07  | 7.42E-01 | -0.16 | 4.15E-01 |
| <b>SMCO1</b>          | 0.28  | 1.42E-01 | 0.16  | 4.15E-01 |
| <b>TBC1D9</b>         | 0.17  | 3.93E-01 | 0.16  | 4.15E-01 |
| <b>XLOC_008613</b>    | 0.05  | 8.10E-01 | -0.16 | 4.15E-01 |
| <b>ZC3H3</b>          | 0.21  | 2.89E-01 | 0.16  | 4.15E-01 |
| <b>ZNF263</b>         | 0.11  | 5.71E-01 | -0.16 | 4.15E-01 |
| <b>ADRB1</b>          | -0.07 | 7.38E-01 | -0.16 | 4.16E-01 |
| <b>APOA1BP</b>        | 0.09  | 6.61E-01 | 0.16  | 4.16E-01 |
| <b>CTB-147N14.6</b>   | -0.16 | 4.27E-01 | 0.16  | 4.16E-01 |
| <b>DHDH</b>           | -0.16 | 4.14E-01 | 0.16  | 4.16E-01 |
| <b>EFCAB14-AS1</b>    | 0.01  | 9.46E-01 | -0.16 | 4.16E-01 |
| <b>G36480</b>         | -0.07 | 7.18E-01 | 0.16  | 4.16E-01 |
| <b>KB-1562D12.1</b>   | 0.10  | 5.96E-01 | -0.16 | 4.16E-01 |
| <b>MINOS1P2</b>       | -0.26 | 1.73E-01 | -0.16 | 4.16E-01 |
| <b>MIR616</b>         | -0.07 | 7.28E-01 | 0.16  | 4.16E-01 |
| <b>PLEKHN1</b>        | -0.19 | 3.32E-01 | 0.16  | 4.16E-01 |
| <b>PPP1R1B</b>        | -0.24 | 2.22E-01 | -0.16 | 4.16E-01 |
| <b>RAD51D</b>         | -0.05 | 8.02E-01 | 0.16  | 4.16E-01 |
| <b>RN7SL329P</b>      | 0.05  | 7.85E-01 | 0.16  | 4.16E-01 |
| <b>RNF224</b>         | 0.08  | 6.89E-01 | -0.16 | 4.16E-01 |
| <b>RP1-12G14.6</b>    | -0.35 | 7.10E-02 | -0.16 | 4.16E-01 |
| <b>RP11-131N11.4</b>  | 0.21  | 2.75E-01 | 0.16  | 4.16E-01 |
| <b>RP11-195C7.1</b>   | -0.01 | 9.74E-01 | -0.16 | 4.16E-01 |
| <b>RP11-263K19.4</b>  | -0.27 | 1.64E-01 | -0.16 | 4.16E-01 |
| <b>RP11-327P2.5</b>   | 0.01  | 9.47E-01 | -0.16 | 4.16E-01 |
| <b>RP11-345P4.9</b>   | -0.13 | 5.07E-01 | 0.16  | 4.16E-01 |



|                      |       |          |       |          |
|----------------------|-------|----------|-------|----------|
| <b>RP11-442J21.2</b> | 0.21  | 2.82E-01 | 0.16  | 4.16E-01 |
| <b>SLC25A20</b>      | 0.17  | 3.95E-01 | -0.16 | 4.16E-01 |
| <b>SLC4A7</b>        | 0.23  | 2.43E-01 | 0.16  | 4.16E-01 |
| <b>SNX33</b>         | 0.07  | 7.18E-01 | 0.16  | 4.16E-01 |
| <b>SOX9-AS1</b>      | -0.22 | 2.61E-01 | -0.16 | 4.16E-01 |
| <b>SPCS2P4</b>       | -0.45 | 1.70E-02 | -0.16 | 4.16E-01 |
| <b>TRIP12</b>        | 0.26  | 1.73E-01 | 0.16  | 4.16E-01 |
| <b>UBA2</b>          | 0.04  | 8.31E-01 | -0.16 | 4.16E-01 |
| <b>WDR86</b>         | -0.02 | 9.00E-01 | 0.16  | 4.16E-01 |
| <b>WSB2</b>          | 0.10  | 6.28E-01 | 0.16  | 4.16E-01 |
| <b>XLOC_009911</b>   | -0.08 | 6.75E-01 | 0.16  | 4.16E-01 |
| <b>CPZ</b>           | -0.34 | 7.32E-02 | -0.16 | 4.17E-01 |
| <b>GJC2</b>          | -0.08 | 6.71E-01 | -0.16 | 4.17E-01 |
| <b>GLDCP1</b>        | 0.36  | 6.15E-02 | -0.16 | 4.17E-01 |
| <b>KCNJ1</b>         | 0.07  | 7.31E-01 | -0.16 | 4.17E-01 |
| <b>MIR933</b>        | -0.10 | 6.11E-01 | -0.16 | 4.17E-01 |
| <b>RP11-276H1.2</b>  | -0.14 | 4.62E-01 | -0.16 | 4.17E-01 |
| <b>TMEM168</b>       | 0.09  | 6.50E-01 | -0.16 | 4.17E-01 |
| <b>ZBTB8A</b>        | -0.12 | 5.48E-01 | -0.16 | 4.17E-01 |
| <b>AHCYL1</b>        | 0.10  | 6.02E-01 | 0.16  | 4.17E-01 |
| <b>C1orf101</b>      | 0.21  | 2.95E-01 | 0.16  | 4.17E-01 |
| <b>CITED2</b>        | 0.11  | 5.66E-01 | 0.16  | 4.17E-01 |
| <b>DUSP22</b>        | 0.00  | 9.86E-01 | 0.16  | 4.17E-01 |
| <b>FIGNL2</b>        | 0.24  | 2.10E-01 | 0.16  | 4.17E-01 |
| <b>FRAT1</b>         | 0.05  | 8.11E-01 | 0.16  | 4.17E-01 |
| <b>G4303</b>         | 0.21  | 2.80E-01 | 0.16  | 4.17E-01 |
| <b>HRC</b>           | 0.06  | 7.79E-01 | 0.16  | 4.17E-01 |
| <b>KDM5B</b>         | 0.06  | 7.58E-01 | 0.16  | 4.17E-01 |
| <b>MIR590</b>        | -0.05 | 8.02E-01 | 0.16  | 4.17E-01 |
| <b>MRPS14</b>        | -0.07 | 7.29E-01 | 0.16  | 4.17E-01 |
| <b>MTF1</b>          | 0.26  | 1.73E-01 | 0.16  | 4.17E-01 |
| <b>RNU5B-2P</b>      | 0.11  | 5.89E-01 | 0.16  | 4.17E-01 |
| <b>RP11-174F8.1</b>  | 0.08  | 6.97E-01 | 0.16  | 4.17E-01 |
| <b>RP11-253E3.1</b>  | -0.01 | 9.46E-01 | 0.16  | 4.17E-01 |
| <b>RP11-350N15.4</b> | -0.01 | 9.61E-01 | 0.16  | 4.17E-01 |
| <b>RP11-486G15.2</b> | 0.25  | 1.96E-01 | 0.16  | 4.17E-01 |
| <b>SH3BGRL3</b>      | 0.12  | 5.43E-01 | 0.16  | 4.17E-01 |
| <b>STK11</b>         | 0.36  | 5.82E-02 | 0.16  | 4.17E-01 |
| <b>TRAJ21</b>        | 0.07  | 7.07E-01 | 0.16  | 4.17E-01 |
| <b>WWC2-AS1</b>      | -0.02 | 9.11E-01 | 0.16  | 4.17E-01 |
| <b>AC010761.13</b>   | 0.08  | 6.78E-01 | -0.16 | 4.18E-01 |
| <b>AC067960.1</b>    | 0.08  | 6.96E-01 | 0.16  | 4.18E-01 |
| <b>ACSS3</b>         | -0.24 | 2.21E-01 | -0.16 | 4.18E-01 |
| <b>C9orf69</b>       | 0.08  | 6.80E-01 | 0.16  | 4.18E-01 |
| <b>CAPN10</b>        | -0.11 | 5.89E-01 | -0.16 | 4.18E-01 |
| <b>CLEC4D</b>        | 0.20  | 3.10E-01 | 0.16  | 4.18E-01 |
| <b>CTB-33O18.1</b>   | 0.06  | 7.78E-01 | -0.16 | 4.18E-01 |

|                      |       |          |       |          |
|----------------------|-------|----------|-------|----------|
| <b>CTC-327F10.4</b>  | -0.20 | 2.97E-01 | -0.16 | 4.18E-01 |
| <b>CTDP1</b>         | -0.05 | 7.83E-01 | -0.16 | 4.18E-01 |
| <b>EMILIN2</b>       | -0.07 | 7.33E-01 | 0.16  | 4.18E-01 |
| <b>EPHB4</b>         | 0.42  | 2.74E-02 | 0.16  | 4.18E-01 |
| <b>ERF</b>           | 0.03  | 8.76E-01 | 0.16  | 4.18E-01 |
| <b>G3694</b>         | 0.05  | 8.00E-01 | -0.16 | 4.18E-01 |
| <b>HAMP</b>          | -0.16 | 4.24E-01 | 0.16  | 4.18E-01 |
| <b>KIAA1211</b>      | -0.13 | 5.04E-01 | -0.16 | 4.18E-01 |
| <b>MLEC</b>          | -0.08 | 7.02E-01 | -0.16 | 4.18E-01 |
| <b>MPHOSPH6</b>      | 0.37  | 5.50E-02 | 0.16  | 4.18E-01 |
| <b>MRO</b>           | 0.05  | 7.91E-01 | -0.16 | 4.18E-01 |
| <b>NRG2</b>          | 0.38  | 4.83E-02 | 0.16  | 4.18E-01 |
| <b>NTNG2</b>         | -0.04 | 8.26E-01 | 0.16  | 4.18E-01 |
| <b>PI16</b>          | -0.18 | 3.58E-01 | -0.16 | 4.18E-01 |
| <b>RP11-303G3.6</b>  | -0.23 | 2.40E-01 | -0.16 | 4.18E-01 |
| <b>RP11-381K20.2</b> | 0.14  | 4.93E-01 | -0.16 | 4.18E-01 |
| <b>RP11-455I9.1</b>  | 0.23  | 2.46E-01 | 0.16  | 4.18E-01 |
| <b>RP3-412A9.17</b>  | 0.02  | 9.32E-01 | -0.16 | 4.18E-01 |
| <b>SRM</b>           | 0.17  | 3.96E-01 | 0.16  | 4.18E-01 |
| <b>TFPI</b>          | 0.07  | 7.16E-01 | 0.16  | 4.18E-01 |
| <b>TMEM255B</b>      | -0.14 | 4.65E-01 | 0.16  | 4.18E-01 |
| <b>AC007461.2</b>    | -0.51 | 5.71E-03 | -0.16 | 4.19E-01 |
| <b>CA15P1</b>        | -0.08 | 7.02E-01 | -0.16 | 4.19E-01 |
| <b>CCDC115</b>       | 0.24  | 2.18E-01 | 0.16  | 4.19E-01 |
| <b>CTB-35F21.1</b>   | -0.30 | 1.24E-01 | -0.16 | 4.19E-01 |
| <b>DFNB31</b>        | -0.06 | 7.60E-01 | -0.16 | 4.19E-01 |
| <b>FOXA1</b>         | -0.25 | 2.00E-01 | -0.16 | 4.19E-01 |
| <b>GABRA3</b>        | 0.06  | 7.71E-01 | 0.16  | 4.19E-01 |
| <b>GJA3</b>          | 0.27  | 1.62E-01 | 0.16  | 4.19E-01 |
| <b>H19</b>           | -0.43 | 2.26E-02 | -0.16 | 4.19E-01 |
| <b>JPH4</b>          | -0.10 | 6.00E-01 | -0.16 | 4.19E-01 |
| <b>LEO1</b>          | 0.36  | 6.18E-02 | -0.16 | 4.19E-01 |
| <b>LINC01376</b>     | -0.48 | 9.65E-03 | -0.16 | 4.19E-01 |
| <b>LYPLAL1</b>       | 0.12  | 5.33E-01 | -0.16 | 4.19E-01 |
| <b>MBTPS1</b>        | -0.07 | 7.27E-01 | 0.16  | 4.19E-01 |
| <b>MIR3164</b>       | 0.06  | 7.71E-01 | 0.16  | 4.19E-01 |
| <b>MPPED1</b>        | 0.14  | 4.92E-01 | -0.16 | 4.19E-01 |
| <b>PCBP3</b>         | 0.17  | 3.75E-01 | 0.16  | 4.19E-01 |
| <b>ROPN1L</b>        | 0.01  | 9.59E-01 | 0.16  | 4.19E-01 |
| <b>RP11-140K17.3</b> | -0.17 | 3.73E-01 | 0.16  | 4.19E-01 |
| <b>SCN7A</b>         | -0.40 | 3.36E-02 | -0.16 | 4.19E-01 |
| <b>SEMA3A</b>        | -0.03 | 8.95E-01 | -0.16 | 4.19E-01 |
| <b>SOAT2</b>         | 0.28  | 1.42E-01 | -0.16 | 4.19E-01 |
| <b>SYF2P2</b>        | 0.02  | 9.12E-01 | -0.16 | 4.19E-01 |
| <b>ZNF35</b>         | 0.24  | 2.14E-01 | -0.16 | 4.19E-01 |
| <b>ZNF747</b>        | 0.27  | 1.66E-01 | 0.16  | 4.19E-01 |
| <b>AC078852.2</b>    | -0.32 | 9.93E-02 | -0.16 | 4.20E-01 |

|                 |       |          |       |          |
|-----------------|-------|----------|-------|----------|
| AC079354.6      | 0.02  | 9.20E-01 | -0.16 | 4.20E-01 |
| ACTG1P10        | 0.01  | 9.59E-01 | -0.16 | 4.20E-01 |
| ARSD            | -0.10 | 6.09E-01 | 0.16  | 4.20E-01 |
| ATP13A3         | 0.02  | 9.26E-01 | -0.16 | 4.20E-01 |
| CD6             | 0.35  | 6.84E-02 | 0.16  | 4.20E-01 |
| COPZ2           | -0.14 | 4.69E-01 | 0.16  | 4.20E-01 |
| CYGB            | -0.28 | 1.42E-01 | -0.16 | 4.20E-01 |
| DEFB108B        | -0.02 | 9.34E-01 | 0.16  | 4.20E-01 |
| FAM110B         | -0.35 | 6.94E-02 | 0.16  | 4.20E-01 |
| FAM186B         | -0.07 | 7.22E-01 | -0.16 | 4.20E-01 |
| G24466          | -0.17 | 3.78E-01 | -0.16 | 4.20E-01 |
| GLE1            | 0.07  | 7.39E-01 | 0.16  | 4.20E-01 |
| GPR75           | 0.23  | 2.47E-01 | -0.16 | 4.20E-01 |
| HMGCS1          | 0.29  | 1.36E-01 | -0.16 | 4.20E-01 |
| LINC00886       | -0.17 | 3.76E-01 | -0.16 | 4.20E-01 |
| MRPS5           | 0.20  | 3.11E-01 | 0.16  | 4.20E-01 |
| NEB             | -0.18 | 3.50E-01 | -0.16 | 4.20E-01 |
| POR             | 0.26  | 1.86E-01 | 0.16  | 4.20E-01 |
| RNU6-79P        | -0.12 | 5.29E-01 | 0.16  | 4.20E-01 |
| RP1-20B11.2     | -0.08 | 6.82E-01 | -0.16 | 4.20E-01 |
| RP11-248J18.2   | -0.05 | 7.88E-01 | -0.16 | 4.20E-01 |
| RP11-403B2.6    | 0.19  | 3.36E-01 | -0.16 | 4.20E-01 |
| RP13-270P17.1   | 0.07  | 7.31E-01 | 0.16  | 4.20E-01 |
| SDCBPP1         | -0.25 | 2.02E-01 | -0.16 | 4.20E-01 |
| SNRPGP15        | 0.13  | 5.23E-01 | 0.16  | 4.20E-01 |
| Xyac-YX65C7_A.2 | -0.28 | 1.43E-01 | 0.16  | 4.20E-01 |
| YPEL5           | 0.04  | 8.48E-01 | 0.16  | 4.20E-01 |
| ZNF250          | -0.09 | 6.33E-01 | -0.16 | 4.20E-01 |
| ZNF428          | 0.15  | 4.56E-01 | 0.16  | 4.20E-01 |
| AC073254.1      | -0.41 | 3.01E-02 | -0.16 | 4.21E-01 |
| ACSM5           | 0.09  | 6.37E-01 | 0.16  | 4.21E-01 |
| ASB15           | -0.22 | 2.66E-01 | 0.16  | 4.21E-01 |
| C6orf58         | 0.08  | 6.72E-01 | 0.16  | 4.21E-01 |
| CYP46A1         | 0.16  | 4.16E-01 | 0.16  | 4.21E-01 |
| DDC             | 0.26  | 1.78E-01 | -0.16 | 4.21E-01 |
| DENND2D         | 0.05  | 8.18E-01 | 0.16  | 4.21E-01 |
| GPR141          | 0.24  | 2.22E-01 | 0.16  | 4.21E-01 |
| IGF1R           | -0.20 | 3.00E-01 | -0.16 | 4.21E-01 |
| ISCA1           | 0.00  | 9.99E-01 | -0.16 | 4.21E-01 |
| KIF13B          | 0.01  | 9.47E-01 | -0.16 | 4.21E-01 |
| MIR5091         | -0.22 | 2.69E-01 | 0.16  | 4.21E-01 |
| OXA1L           | -0.07 | 7.30E-01 | 0.16  | 4.21E-01 |
| PPP2R1A         | 0.25  | 2.06E-01 | 0.16  | 4.21E-01 |
| PSEN1           | 0.13  | 5.04E-01 | 0.16  | 4.21E-01 |
| RHEBP2          | 0.25  | 2.04E-01 | 0.16  | 4.21E-01 |
| RP11-188C12.2   | 0.03  | 8.75E-01 | 0.16  | 4.21E-01 |
| RP11-253A20.1   | 0.03  | 8.77E-01 | -0.16 | 4.21E-01 |

|                      |       |          |       |          |
|----------------------|-------|----------|-------|----------|
| <b>RP11-641D5.2</b>  | 0.05  | 8.07E-01 | 0.16  | 4.21E-01 |
| <b>RP11-693J15.5</b> | 0.15  | 4.50E-01 | 0.16  | 4.21E-01 |
| <b>SDHA</b>          | 0.07  | 7.32E-01 | 0.16  | 4.21E-01 |
| <b>SLC2A3P4</b>      | 0.10  | 5.95E-01 | -0.16 | 4.21E-01 |
| <b>SPAG5-AS1</b>     | -0.13 | 5.17E-01 | -0.16 | 4.21E-01 |
| <b>TTC8</b>          | -0.10 | 6.27E-01 | 0.16  | 4.21E-01 |
| <b>UBE2F</b>         | 0.53  | 3.39E-03 | 0.16  | 4.21E-01 |
| <b>UBE2Q1</b>        | 0.01  | 9.79E-01 | 0.16  | 4.21E-01 |
| <b>USP3-AS1</b>      | -0.05 | 7.97E-01 | -0.16 | 4.21E-01 |
| <b>WIPF1</b>         | 0.05  | 8.16E-01 | 0.16  | 4.21E-01 |
| <b>ZNF266</b>        | -0.19 | 3.39E-01 | -0.16 | 4.21E-01 |
| <b>ACOT4</b>         | 0.11  | 5.85E-01 | -0.16 | 4.22E-01 |
| <b>ADCY1</b>         | -0.28 | 1.44E-01 | 0.16  | 4.22E-01 |
| <b>ARHGAP29</b>      | -0.04 | 8.36E-01 | 0.16  | 4.22E-01 |
| <b>HMGB1P10</b>      | -0.09 | 6.40E-01 | -0.16 | 4.22E-01 |
| <b>KIF20B</b>        | 0.13  | 5.14E-01 | 0.16  | 4.22E-01 |
| <b>LHX4</b>          | -0.06 | 7.49E-01 | -0.16 | 4.22E-01 |
| <b>LPP-AS1</b>       | -0.06 | 7.67E-01 | 0.16  | 4.22E-01 |
| <b>MPHOSPH9</b>      | 0.10  | 6.06E-01 | -0.16 | 4.22E-01 |
| <b>MYCT1</b>         | -0.20 | 3.01E-01 | 0.16  | 4.22E-01 |
| <b>NGDN</b>          | 0.05  | 7.84E-01 | -0.16 | 4.22E-01 |
| <b>OLFML2A</b>       | -0.02 | 9.04E-01 | 0.16  | 4.22E-01 |
| <b>PHF14</b>         | 0.02  | 9.02E-01 | -0.16 | 4.22E-01 |
| <b>PSMD9</b>         | 0.08  | 6.75E-01 | 0.16  | 4.22E-01 |
| <b>RNU6-633P</b>     | 0.08  | 6.89E-01 | -0.16 | 4.22E-01 |
| <b>RP11-110G21.2</b> | -0.11 | 5.66E-01 | -0.16 | 4.22E-01 |
| <b>RP11-156P1.3</b>  | 0.03  | 8.99E-01 | -0.16 | 4.22E-01 |
| <b>RP11-666A8.9</b>  | 0.05  | 8.17E-01 | -0.16 | 4.22E-01 |
| <b>RP11-74J13.9</b>  | -0.16 | 4.06E-01 | -0.16 | 4.22E-01 |
| <b>RP3-520B18.1</b>  | 0.08  | 6.99E-01 | -0.16 | 4.22E-01 |
| <b>SDK1</b>          | -0.03 | 8.66E-01 | 0.16  | 4.22E-01 |
| <b>TNFAIP1</b>       | 0.17  | 3.94E-01 | 0.16  | 4.22E-01 |
| <b>UBXN6</b>         | -0.06 | 7.60E-01 | 0.16  | 4.22E-01 |
| <b>AC016907.3</b>    | -0.04 | 8.43E-01 | 0.16  | 4.23E-01 |
| <b>ANXA6</b>         | -0.02 | 9.17E-01 | 0.16  | 4.23E-01 |
| <b>ARRDC5</b>        | 0.39  | 4.23E-02 | 0.16  | 4.23E-01 |
| <b>JAKMIP1</b>       | 0.09  | 6.67E-01 | 0.16  | 4.23E-01 |
| <b>LINC00162</b>     | 0.16  | 4.16E-01 | 0.16  | 4.23E-01 |
| <b>NT5C</b>          | 0.06  | 7.43E-01 | 0.16  | 4.23E-01 |
| <b>OR7A5</b>         | -0.49 | 7.67E-03 | 0.16  | 4.23E-01 |
| <b>RP11-46I1.2</b>   | 0.05  | 7.92E-01 | 0.16  | 4.23E-01 |
| <b>RP11-603K19.1</b> | -0.07 | 7.30E-01 | 0.16  | 4.23E-01 |
| <b>SRA1</b>          | 0.05  | 8.14E-01 | 0.16  | 4.23E-01 |
| <b>SWI5</b>          | 0.20  | 3.08E-01 | 0.16  | 4.23E-01 |
| <b>THAP4</b>         | 0.07  | 7.32E-01 | 0.16  | 4.23E-01 |
| <b>ZNF512</b>        | -0.29 | 1.30E-01 | 0.16  | 4.23E-01 |
| <b>ABHD13</b>        | -0.03 | 8.95E-01 | -0.16 | 4.23E-01 |

|                |       |          |       |          |
|----------------|-------|----------|-------|----------|
| AC006019.3     | 0.20  | 3.15E-01 | -0.16 | 4.23E-01 |
| ANGPTL5        | -0.24 | 2.14E-01 | -0.16 | 4.23E-01 |
| CD55           | -0.09 | 6.43E-01 | -0.16 | 4.23E-01 |
| CTD-2260A17.1  | -0.06 | 7.60E-01 | -0.16 | 4.23E-01 |
| CTD-2517O10.6  | -0.10 | 6.26E-01 | -0.16 | 4.23E-01 |
| EMC3-AS1       | 0.04  | 8.23E-01 | -0.16 | 4.23E-01 |
| FBXL16         | -0.23 | 2.46E-01 | -0.16 | 4.23E-01 |
| GRHL1          | 0.11  | 5.86E-01 | -0.16 | 4.23E-01 |
| HEATR4         | 0.19  | 3.28E-01 | -0.16 | 4.23E-01 |
| KIF5B          | -0.09 | 6.62E-01 | -0.16 | 4.23E-01 |
| RP11-893F2.18  | -0.10 | 6.02E-01 | -0.16 | 4.23E-01 |
| RP11-97O12.7   | -0.07 | 7.05E-01 | -0.16 | 4.23E-01 |
| SNORD71        | 0.27  | 1.72E-01 | -0.16 | 4.23E-01 |
| SNORD91B       | -0.05 | 8.09E-01 | -0.16 | 4.23E-01 |
| STK26          | 0.08  | 6.96E-01 | -0.16 | 4.23E-01 |
| XLOC_014103    | -0.23 | 2.34E-01 | -0.16 | 4.23E-01 |
| XLOC_014288    | -0.31 | 1.11E-01 | -0.16 | 4.23E-01 |
| ZDHHC2         | -0.24 | 2.27E-01 | -0.16 | 4.23E-01 |
| ABCA10         | -0.21 | 2.83E-01 | -0.16 | 4.23E-01 |
| AC000003.2     | 0.14  | 4.82E-01 | -0.16 | 4.23E-01 |
| AC009950.2     | 0.13  | 5.21E-01 | 0.16  | 4.23E-01 |
| ATG4B          | 0.10  | 6.15E-01 | 0.16  | 4.23E-01 |
| C2orf73        | 0.09  | 6.36E-01 | -0.16 | 4.23E-01 |
| CDK13          | 0.03  | 8.90E-01 | -0.16 | 4.23E-01 |
| COMMD1         | -0.03 | 8.79E-01 | 0.16  | 4.23E-01 |
| CTB-3M24.3     | -0.09 | 6.56E-01 | 0.16  | 4.23E-01 |
| CTD-2310F14.1  | 0.23  | 2.37E-01 | -0.16 | 4.23E-01 |
| CTU2           | 0.11  | 5.66E-01 | 0.16  | 4.23E-01 |
| EFCAB8         | -0.02 | 9.31E-01 | -0.16 | 4.23E-01 |
| EFHD2          | 0.28  | 1.56E-01 | 0.16  | 4.23E-01 |
| FILIP1         | -0.05 | 8.05E-01 | 0.16  | 4.23E-01 |
| G35531         | -0.55 | 2.50E-03 | 0.16  | 4.23E-01 |
| HIGD1A         | 0.40  | 3.69E-02 | 0.16  | 4.23E-01 |
| ICOSLG         | -0.26 | 1.89E-01 | -0.16 | 4.23E-01 |
| IFT43          | -0.07 | 7.28E-01 | -0.16 | 4.23E-01 |
| IGF2           | -0.14 | 4.76E-01 | 0.16  | 4.23E-01 |
| METTL6         | -0.09 | 6.44E-01 | 0.16  | 4.23E-01 |
| RALGAPA1P      | -0.25 | 2.06E-01 | -0.16 | 4.23E-01 |
| RP11-108L7.15  | 0.00  | 9.83E-01 | -0.16 | 4.23E-01 |
| RP11-155N3.4   | 0.13  | 5.25E-01 | 0.16  | 4.23E-01 |
| RP11-293M10.1  | -0.12 | 5.45E-01 | -0.16 | 4.23E-01 |
| RP11-395L14.18 | 0.05  | 8.15E-01 | -0.16 | 4.23E-01 |
| RPL30P2        | -0.41 | 3.15E-02 | -0.16 | 4.23E-01 |
| SORBS3         | -0.23 | 2.32E-01 | 0.16  | 4.23E-01 |
| SPINK5         | 0.10  | 6.01E-01 | -0.16 | 4.23E-01 |
| TCF7L1-IT1     | -0.45 | 1.50E-02 | 0.16  | 4.23E-01 |
| TNXA           | -0.41 | 2.96E-02 | -0.16 | 4.23E-01 |

|               |       |          |       |          |
|---------------|-------|----------|-------|----------|
| WISP3         | -0.30 | 1.18E-01 | 0.16  | 4.23E-01 |
| ZNF683        | -0.05 | 7.99E-01 | 0.16  | 4.23E-01 |
| ZNF791        | -0.10 | 6.27E-01 | -0.16 | 4.23E-01 |
| ASAP3         | -0.14 | 4.89E-01 | 0.16  | 4.24E-01 |
| BOLA1         | -0.03 | 8.97E-01 | 0.16  | 4.24E-01 |
| CASP12        | -0.30 | 1.22E-01 | -0.16 | 4.24E-01 |
| CIDEA         | 0.05  | 8.02E-01 | -0.16 | 4.24E-01 |
| CLIP1-AS1     | -0.22 | 2.59E-01 | -0.16 | 4.24E-01 |
| CPT2          | 0.35  | 6.77E-02 | 0.16  | 4.24E-01 |
| G25515        | -0.36 | 6.33E-02 | 0.16  | 4.24E-01 |
| G35913        | 0.18  | 3.51E-01 | -0.16 | 4.24E-01 |
| JUP           | 0.25  | 1.91E-01 | 0.16  | 4.24E-01 |
| MLPH          | -0.41 | 3.18E-02 | -0.16 | 4.24E-01 |
| MYPN          | 0.16  | 4.03E-01 | 0.16  | 4.24E-01 |
| N4BP2L1       | -0.11 | 5.89E-01 | -0.16 | 4.24E-01 |
| PSME1         | 0.24  | 2.20E-01 | 0.16  | 4.24E-01 |
| RP11-314A20.1 | 0.16  | 4.04E-01 | -0.16 | 4.24E-01 |
| RP11-316M21.6 | -0.01 | 9.65E-01 | -0.16 | 4.24E-01 |
| RP11-367H5.8  | -0.03 | 8.78E-01 | 0.16  | 4.24E-01 |
| RP11-680F20.9 | -0.22 | 2.71E-01 | -0.16 | 4.24E-01 |
| RP11-693N9.2  | -0.23 | 2.38E-01 | -0.16 | 4.24E-01 |
| RPL36AP41     | -0.11 | 5.82E-01 | -0.16 | 4.24E-01 |
| VPS16         | 0.00  | 9.94E-01 | 0.16  | 4.24E-01 |
| Z95704.5      | -0.16 | 4.02E-01 | 0.16  | 4.24E-01 |
| ZHX2          | -0.18 | 3.63E-01 | 0.16  | 4.24E-01 |
| ZNF582-AS1    | -0.19 | 3.39E-01 | -0.16 | 4.24E-01 |
| AC017104.2    | 0.06  | 7.54E-01 | 0.16  | 4.25E-01 |
| AL590431.1    | -0.01 | 9.53E-01 | -0.16 | 4.25E-01 |
| AP4S1         | -0.08 | 6.80E-01 | -0.16 | 4.25E-01 |
| CTD-2066L21.1 | -0.03 | 8.87E-01 | -0.16 | 4.25E-01 |
| EARS2         | 0.19  | 3.42E-01 | 0.16  | 4.25E-01 |
| ISM1-AS1      | -0.20 | 3.09E-01 | -0.16 | 4.25E-01 |
| NIM1K         | -0.18 | 3.53E-01 | -0.16 | 4.25E-01 |
| PAMR1         | -0.34 | 7.32E-02 | -0.16 | 4.25E-01 |
| PLCG1-AS1     | 0.13  | 5.20E-01 | -0.16 | 4.25E-01 |
| RP11-737O24.3 | 0.10  | 6.25E-01 | -0.16 | 4.25E-01 |
| SNORD116-14   | 0.23  | 2.33E-01 | -0.16 | 4.25E-01 |
| SUGT1         | -0.20 | 3.08E-01 | -0.16 | 4.25E-01 |
| TFPI2         | -0.07 | 7.28E-01 | -0.16 | 4.25E-01 |
| TMEM191A      | 0.04  | 8.26E-01 | 0.16  | 4.25E-01 |
| TSTD1         | -0.06 | 7.73E-01 | 0.16  | 4.25E-01 |
| XLOC_002952   | -0.31 | 1.09E-01 | -0.16 | 4.25E-01 |
| XLOC_013981   | -0.16 | 4.28E-01 | -0.16 | 4.25E-01 |
| ZDBF2         | 0.20  | 3.02E-01 | -0.16 | 4.25E-01 |
| ZNF385C       | 0.12  | 5.37E-01 | 0.16  | 4.25E-01 |
| AC079807.2    | -0.29 | 1.42E-01 | 0.16  | 4.26E-01 |
| DHDDS         | 0.20  | 3.16E-01 | 0.16  | 4.26E-01 |

|                |       |          |       |          |
|----------------|-------|----------|-------|----------|
| IMMTP1         | -0.04 | 8.25E-01 | 0.16  | 4.26E-01 |
| ITPA           | 0.19  | 3.45E-01 | 0.16  | 4.26E-01 |
| RNU7-196P      | -0.17 | 3.83E-01 | 0.16  | 4.26E-01 |
| RP11-775L16.1  | -0.04 | 8.37E-01 | 0.16  | 4.26E-01 |
| RP11-90L1.8    | 0.26  | 1.78E-01 | 0.16  | 4.26E-01 |
| TLR3           | 0.19  | 3.26E-01 | 0.16  | 4.26E-01 |
| CTD-2224J9.8   | -0.33 | 8.32E-02 | -0.16 | 4.26E-01 |
| IRF2BP1        | 0.20  | 3.11E-01 | -0.16 | 4.26E-01 |
| LSM3P2         | -0.25 | 2.04E-01 | -0.16 | 4.26E-01 |
| PIK3C2G        | -0.07 | 7.09E-01 | -0.16 | 4.26E-01 |
| RP11-317F20.3  | -0.23 | 2.36E-01 | -0.16 | 4.26E-01 |
| RP11-49I11.4   | -0.30 | 1.16E-01 | -0.16 | 4.26E-01 |
| RP13-36G14.3   | 0.06  | 7.54E-01 | -0.16 | 4.26E-01 |
| RPL12P44       | -0.26 | 1.81E-01 | -0.16 | 4.26E-01 |
| RPL5P32        | -0.16 | 4.14E-01 | -0.16 | 4.26E-01 |
| RUNDC3A-AS1    | 0.05  | 7.96E-01 | -0.16 | 4.26E-01 |
| SNORD112       | 0.23  | 2.36E-01 | -0.16 | 4.26E-01 |
| SPATA6         | -0.21 | 2.91E-01 | -0.16 | 4.26E-01 |
| TPP2           | -0.14 | 4.86E-01 | -0.16 | 4.26E-01 |
| VWDE           | -0.05 | 7.89E-01 | -0.16 | 4.26E-01 |
| ZGLP1          | -0.29 | 1.39E-01 | -0.16 | 4.26E-01 |
| AHRR           | -0.10 | 6.14E-01 | -0.16 | 4.27E-01 |
| AKR1B10P1      | 0.06  | 7.54E-01 | -0.16 | 4.27E-01 |
| ARGFXP2        | -0.26 | 1.81E-01 | -0.16 | 4.27E-01 |
| ATP2C1         | -0.02 | 9.13E-01 | 0.16  | 4.27E-01 |
| DBN1           | -0.17 | 3.76E-01 | 0.16  | 4.27E-01 |
| FDFT1          | 0.18  | 3.51E-01 | 0.16  | 4.27E-01 |
| FLI1           | 0.00  | 9.82E-01 | 0.16  | 4.27E-01 |
| LCE2D          | 0.06  | 7.68E-01 | 0.16  | 4.27E-01 |
| LHB            | 0.17  | 4.00E-01 | 0.16  | 4.27E-01 |
| LINC00674      | -0.18 | 3.49E-01 | -0.16 | 4.27E-01 |
| LSM10          | -0.04 | 8.50E-01 | 0.16  | 4.27E-01 |
| PAK3           | -0.09 | 6.35E-01 | -0.16 | 4.27E-01 |
| PCDHGA4        | -0.16 | 4.27E-01 | -0.16 | 4.27E-01 |
| PIGL           | -0.11 | 5.90E-01 | -0.16 | 4.27E-01 |
| PPP2R1B        | 0.15  | 4.40E-01 | -0.16 | 4.27E-01 |
| REEP3          | 0.10  | 6.17E-01 | -0.16 | 4.27E-01 |
| RP11-1197K16.2 | 0.09  | 6.58E-01 | -0.16 | 4.27E-01 |
| RP11-275I4.2   | 0.36  | 6.20E-02 | 0.16  | 4.27E-01 |
| RP11-356K23.1  | -0.29 | 1.41E-01 | -0.16 | 4.27E-01 |
| RP11-77G23.2   | -0.32 | 9.50E-02 | -0.16 | 4.27E-01 |
| RP3-391O22.3   | -0.21 | 2.91E-01 | -0.16 | 4.27E-01 |
| SP140          | 0.05  | 7.89E-01 | 0.16  | 4.27E-01 |
| TMEM150C       | 0.05  | 7.89E-01 | 0.16  | 4.27E-01 |
| AC007327.5     | 0.30  | 1.17E-01 | -0.16 | 4.28E-01 |
| AF038458.3     | -0.09 | 6.64E-01 | 0.16  | 4.28E-01 |
| ATP5F1P5       | -0.13 | 5.02E-01 | 0.16  | 4.28E-01 |

|                 |       |          |       |          |
|-----------------|-------|----------|-------|----------|
| C10orf111       | 0.02  | 9.17E-01 | -0.16 | 4.28E-01 |
| CTA-276F8.1     | -0.33 | 8.90E-02 | -0.16 | 4.28E-01 |
| DPEP1           | 0.25  | 1.98E-01 | 0.16  | 4.28E-01 |
| EXOSC3P1        | -0.12 | 5.44E-01 | -0.16 | 4.28E-01 |
| FAM167A-AS1     | 0.00  | 9.89E-01 | -0.16 | 4.28E-01 |
| FANCC           | -0.35 | 7.03E-02 | -0.16 | 4.28E-01 |
| LCE4A           | -0.07 | 7.21E-01 | 0.16  | 4.28E-01 |
| LL21NC02-1C16.2 | 0.05  | 7.84E-01 | 0.16  | 4.28E-01 |
| LRIG2           | -0.07 | 7.05E-01 | -0.16 | 4.28E-01 |
| MEX3B           | -0.01 | 9.46E-01 | -0.16 | 4.28E-01 |
| RBL2            | -0.22 | 2.50E-01 | 0.16  | 4.28E-01 |
| RN7SKP97        | -0.11 | 5.87E-01 | -0.16 | 4.28E-01 |
| RNU6-130P       | 0.32  | 9.99E-02 | 0.16  | 4.28E-01 |
| RP11-16L14.2    | -0.22 | 2.55E-01 | -0.16 | 4.28E-01 |
| RP11-266K22.2   | 0.03  | 8.85E-01 | -0.16 | 4.28E-01 |
| RP11-29G8.3     | -0.08 | 6.83E-01 | -0.16 | 4.28E-01 |
| RP11-561O23.9   | -0.11 | 5.88E-01 | 0.16  | 4.28E-01 |
| RP5-1073F15.1   | 0.06  | 7.47E-01 | 0.16  | 4.28E-01 |
| RP6-42F4.1      | -0.10 | 6.12E-01 | -0.16 | 4.28E-01 |
| SDF2            | 0.07  | 7.27E-01 | 0.16  | 4.28E-01 |
| SEC14L3         | -0.07 | 7.05E-01 | -0.16 | 4.28E-01 |
| SF3B1           | 0.02  | 9.15E-01 | -0.16 | 4.28E-01 |
| SPDYA           | -0.07 | 7.40E-01 | -0.16 | 4.28E-01 |
| TPGS1           | 0.01  | 9.58E-01 | 0.16  | 4.28E-01 |
| TRRAP           | -0.11 | 5.61E-01 | -0.16 | 4.28E-01 |
| AC018878.3      | 0.14  | 4.72E-01 | -0.16 | 4.29E-01 |
| CTB-174D11.1    | -0.04 | 8.32E-01 | -0.16 | 4.29E-01 |
| CTC-370J7.1     | -0.12 | 5.33E-01 | 0.16  | 4.29E-01 |
| CTD-2313N18.7   | 0.24  | 2.13E-01 | -0.16 | 4.29E-01 |
| CTD-2326C4.1    | 0.13  | 5.13E-01 | -0.16 | 4.29E-01 |
| EIF5AL1         | 0.03  | 8.86E-01 | 0.16  | 4.29E-01 |
| ENTPD3          | 0.05  | 8.12E-01 | -0.16 | 4.29E-01 |
| ERCC8           | 0.29  | 1.28E-01 | 0.16  | 4.29E-01 |
| FKBP11          | 0.21  | 2.77E-01 | 0.16  | 4.29E-01 |
| GOLGA8I         | -0.15 | 4.59E-01 | -0.16 | 4.29E-01 |
| KIF15           | -0.06 | 7.49E-01 | -0.16 | 4.29E-01 |
| KLHL13          | -0.33 | 8.84E-02 | 0.16  | 4.29E-01 |
| LINC00484       | 0.00  | 9.88E-01 | 0.16  | 4.29E-01 |
| MYO3B           | -0.26 | 1.75E-01 | -0.16 | 4.29E-01 |
| PRIM1           | 0.11  | 5.60E-01 | 0.16  | 4.29E-01 |
| RNA5SP379       | 0.16  | 4.13E-01 | 0.16  | 4.29E-01 |
| RNU7-108P       | -0.24 | 2.10E-01 | -0.16 | 4.29E-01 |
| RP11-289A15.1   | -0.38 | 4.71E-02 | -0.16 | 4.29E-01 |
| RP11-343H5.4    | -0.29 | 1.36E-01 | -0.16 | 4.29E-01 |
| RP11-478C6.2    | 0.05  | 8.08E-01 | -0.16 | 4.29E-01 |
| RP11-490M8.1    | -0.02 | 9.39E-01 | -0.16 | 4.29E-01 |
| RP11-662B19.2   | -0.07 | 7.42E-01 | 0.16  | 4.29E-01 |



|                 |       |          |       |          |
|-----------------|-------|----------|-------|----------|
| RP11-734K23.9   | 0.02  | 9.32E-01 | -0.16 | 4.29E-01 |
| RP3-449O17.1    | -0.15 | 4.50E-01 | 0.16  | 4.29E-01 |
| RP5-1116H23.3   | -0.23 | 2.41E-01 | -0.16 | 4.29E-01 |
| RPL23AP23       | 0.06  | 7.44E-01 | 0.16  | 4.29E-01 |
| SCHLAP1         | 0.09  | 6.37E-01 | -0.16 | 4.29E-01 |
| SETD2           | -0.12 | 5.27E-01 | -0.16 | 4.29E-01 |
| SUMO2P14        | 0.12  | 5.57E-01 | -0.16 | 4.29E-01 |
| TBC1D12         | -0.08 | 6.78E-01 | 0.16  | 4.29E-01 |
| THSD4           | 0.17  | 3.84E-01 | 0.16  | 4.29E-01 |
| VEGFC           | 0.22  | 2.66E-01 | 0.16  | 4.29E-01 |
| XXbac-BPG27H4.8 | -0.01 | 9.46E-01 | 0.16  | 4.29E-01 |
| AF131215.4      | -0.19 | 3.31E-01 | -0.16 | 4.30E-01 |
| AL359832.1      | 0.01  | 9.57E-01 | -0.16 | 4.30E-01 |
| ARHGEF15        | -0.33 | 8.26E-02 | 0.16  | 4.30E-01 |
| BHMT            | -0.10 | 6.17E-01 | -0.16 | 4.30E-01 |
| CAMK2N2         | 0.35  | 6.57E-02 | 0.16  | 4.30E-01 |
| CTC-444N24.7    | 0.09  | 6.55E-01 | -0.16 | 4.30E-01 |
| CTD-2054N24.2   | -0.09 | 6.63E-01 | -0.16 | 4.30E-01 |
| CTD-2175A23.1   | -0.04 | 8.32E-01 | 0.16  | 4.30E-01 |
| GSTA1           | 0.11  | 5.87E-01 | -0.16 | 4.30E-01 |
| ITPKB-AS1       | -0.04 | 8.43E-01 | -0.16 | 4.30E-01 |
| JAGN1           | 0.11  | 5.64E-01 | 0.16  | 4.30E-01 |
| MDFI            | 0.24  | 2.23E-01 | 0.16  | 4.30E-01 |
| MIR1249         | -0.25 | 2.00E-01 | 0.16  | 4.30E-01 |
| NR2F1           | -0.02 | 9.14E-01 | 0.16  | 4.30E-01 |
| PDCL3P4         | -0.42 | 2.59E-02 | -0.16 | 4.30E-01 |
| PROK2           | -0.15 | 4.49E-01 | 0.16  | 4.30E-01 |
| RN7SKP219       | -0.15 | 4.58E-01 | -0.16 | 4.30E-01 |
| RP1-63M2.7      | -0.28 | 1.52E-01 | -0.16 | 4.30E-01 |
| RP11-181K3.4    | -0.10 | 6.23E-01 | -0.16 | 4.30E-01 |
| RP11-452F19.3   | -0.17 | 3.88E-01 | -0.16 | 4.30E-01 |
| RP11-463I20.3   | -0.29 | 1.34E-01 | 0.16  | 4.30E-01 |
| RP3-508I15.19   | 0.20  | 3.02E-01 | 0.16  | 4.30E-01 |
| SCGB2A1         | -0.09 | 6.33E-01 | -0.16 | 4.30E-01 |
| SETD8           | 0.32  | 9.90E-02 | 0.16  | 4.30E-01 |
| SOX2-OT         | 0.15  | 4.34E-01 | -0.16 | 4.30E-01 |
| SYDE1           | -0.10 | 6.17E-01 | 0.16  | 4.30E-01 |
| AK3             | 0.27  | 1.73E-01 | -0.16 | 4.31E-01 |
| ARHGAP18        | 0.25  | 2.02E-01 | 0.16  | 4.31E-01 |
| FAM95C          | -0.16 | 4.03E-01 | -0.16 | 4.31E-01 |
| G31047          | -0.04 | 8.48E-01 | -0.16 | 4.31E-01 |
| GAB3            | 0.10  | 6.12E-01 | 0.16  | 4.31E-01 |
| IGLV2-14        | 0.02  | 9.29E-01 | 0.16  | 4.31E-01 |
| 7-Mar           | 0.28  | 1.45E-01 | 0.16  | 4.31E-01 |
| NPIP11          | 0.11  | 5.92E-01 | -0.16 | 4.31E-01 |
| PCDHA4          | -0.32 | 9.42E-02 | 0.16  | 4.31E-01 |
| PLCG2           | 0.18  | 3.53E-01 | 0.16  | 4.31E-01 |

|                |       |          |       |          |
|----------------|-------|----------|-------|----------|
| PPIAP6         | -0.13 | 5.05E-01 | 0.16  | 4.31E-01 |
| PSTPIP1        | 0.29  | 1.28E-01 | 0.16  | 4.31E-01 |
| RNF6           | 0.17  | 3.89E-01 | -0.16 | 4.31E-01 |
| RP11-11C20.3   | -0.22 | 2.51E-01 | -0.16 | 4.31E-01 |
| RP11-171I2.3   | 0.02  | 9.09E-01 | -0.16 | 4.31E-01 |
| SARM1          | -0.43 | 2.34E-02 | -0.16 | 4.31E-01 |
| TDO2           | -0.13 | 5.03E-01 | -0.16 | 4.31E-01 |
| ZFP41          | -0.20 | 3.00E-01 | 0.16  | 4.31E-01 |
| ZNF331         | 0.08  | 6.78E-01 | -0.16 | 4.31E-01 |
| ASS1           | 0.07  | 7.32E-01 | -0.16 | 4.31E-01 |
| C10orf71       | -0.12 | 5.38E-01 | -0.16 | 4.31E-01 |
| GLT8D2         | -0.14 | 4.65E-01 | -0.16 | 4.31E-01 |
| MEX3D          | 0.00  | 9.99E-01 | -0.16 | 4.31E-01 |
| MIR4755        | 0.07  | 7.05E-01 | -0.16 | 4.31E-01 |
| RP11-1086F11.1 | -0.22 | 2.52E-01 | -0.16 | 4.31E-01 |
| RP11-347C12.1  | -0.01 | 9.63E-01 | -0.16 | 4.31E-01 |
| RP11-454F8.4   | 0.10  | 6.20E-01 | -0.16 | 4.31E-01 |
| SLC25A32       | 0.25  | 2.09E-01 | -0.16 | 4.31E-01 |
| SNRPB2         | -0.06 | 7.78E-01 | -0.16 | 4.31E-01 |
| TRAPPC5        | -0.03 | 8.87E-01 | -0.16 | 4.31E-01 |
| TRMO           | 0.03  | 8.77E-01 | -0.16 | 4.31E-01 |
| UQCC1          | 0.23  | 2.34E-01 | -0.16 | 4.31E-01 |
| ZNF304         | 0.01  | 9.74E-01 | -0.16 | 4.31E-01 |
| ADD1           | 0.19  | 3.40E-01 | 0.16  | 4.31E-01 |
| C17orf58       | 0.02  | 9.11E-01 | 0.16  | 4.31E-01 |
| CTD-2583A14.8  | 0.02  | 9.13E-01 | 0.16  | 4.31E-01 |
| GALNS          | 0.22  | 2.71E-01 | 0.16  | 4.31E-01 |
| HOXA5          | -0.04 | 8.38E-01 | 0.16  | 4.31E-01 |
| MPZL1          | 0.37  | 5.40E-02 | 0.16  | 4.31E-01 |
| NCOA5          | -0.11 | 5.74E-01 | 0.16  | 4.31E-01 |
| NDUFAF3        | 0.07  | 7.05E-01 | 0.16  | 4.31E-01 |
| RNA5SP219      | -0.13 | 4.98E-01 | 0.16  | 4.31E-01 |
| RP11-147L13.13 | -0.15 | 4.39E-01 | 0.16  | 4.31E-01 |
| RP11-803D5.1   | -0.16 | 4.20E-01 | 0.16  | 4.31E-01 |
| SNHG18         | -0.04 | 8.25E-01 | 0.16  | 4.31E-01 |
| AC005534.6     | -0.02 | 9.18E-01 | -0.16 | 4.32E-01 |
| AC098823.3     | -0.11 | 5.67E-01 | -0.16 | 4.32E-01 |
| CLCN4          | -0.22 | 2.66E-01 | -0.16 | 4.32E-01 |
| FZD5           | 0.27  | 1.66E-01 | 0.16  | 4.32E-01 |
| HIST2H2BD      | -0.50 | 6.96E-03 | 0.16  | 4.32E-01 |
| HJURP          | 0.07  | 7.11E-01 | 0.16  | 4.32E-01 |
| KRR1P1         | 0.17  | 3.74E-01 | -0.16 | 4.32E-01 |
| LTV1           | 0.04  | 8.26E-01 | -0.16 | 4.32E-01 |
| MIR563         | 0.09  | 6.36E-01 | -0.16 | 4.32E-01 |
| MRPL43         | 0.04  | 8.59E-01 | 0.16  | 4.32E-01 |
| MT-TH          | 0.13  | 5.17E-01 | 0.16  | 4.32E-01 |
| NPM1P30        | -0.09 | 6.53E-01 | -0.16 | 4.32E-01 |

|                        |       |          |       |          |
|------------------------|-------|----------|-------|----------|
| <b>RNU6-943P</b>       | -0.05 | 7.98E-01 | -0.16 | 4.32E-01 |
| <b>RP11-114F3.2</b>    | -0.15 | 4.52E-01 | -0.16 | 4.32E-01 |
| <b>RP11-293G6__A.2</b> | -0.38 | 4.89E-02 | -0.16 | 4.32E-01 |
| <b>RP11-344B2.3</b>    | -0.19 | 3.34E-01 | -0.16 | 4.32E-01 |
| <b>RP11-390E23.6</b>   | 0.23  | 2.41E-01 | 0.16  | 4.32E-01 |
| <b>RP11-400F19.12</b>  | 0.24  | 2.12E-01 | -0.16 | 4.32E-01 |
| <b>RP11-462P6.1</b>    | -0.06 | 7.51E-01 | 0.16  | 4.32E-01 |
| <b>RP11-536C5.7</b>    | -0.05 | 7.88E-01 | -0.16 | 4.32E-01 |
| <b>RP11-68I3.5</b>     | -0.16 | 4.14E-01 | -0.16 | 4.32E-01 |
| <b>RPS8</b>            | 0.11  | 5.70E-01 | -0.16 | 4.32E-01 |
| <b>SNAPC3</b>          | 0.10  | 6.16E-01 | -0.16 | 4.32E-01 |
| <b>SPATA17</b>         | -0.17 | 3.79E-01 | -0.16 | 4.32E-01 |
| <b>STRA6</b>           | -0.01 | 9.78E-01 | -0.16 | 4.32E-01 |
| <b>TMEM220-AS1</b>     | 0.03  | 8.95E-01 | -0.16 | 4.32E-01 |
| <b>TUBA8</b>           | -0.10 | 6.16E-01 | -0.16 | 4.32E-01 |
| <b>USP50</b>           | -0.05 | 8.18E-01 | -0.16 | 4.32E-01 |
| <b>XLOC_012579</b>     | -0.23 | 2.29E-01 | -0.16 | 4.32E-01 |
| <b>ZNF385D</b>         | -0.12 | 5.54E-01 | -0.16 | 4.32E-01 |
| <b>ZNF585B</b>         | 0.19  | 3.41E-01 | -0.16 | 4.32E-01 |
| <b>APOBEC3B</b>        | -0.13 | 5.12E-01 | -0.16 | 4.33E-01 |
| <b>BMI1</b>            | -0.01 | 9.53E-01 | -0.16 | 4.33E-01 |
| <b>CLYBL-AS2</b>       | -0.21 | 2.80E-01 | -0.16 | 4.33E-01 |
| <b>FAM87A</b>          | 0.11  | 5.92E-01 | -0.16 | 4.33E-01 |
| <b>MFSD7</b>           | -0.08 | 6.71E-01 | -0.16 | 4.33E-01 |
| <b>N4BP3</b>           | -0.13 | 5.19E-01 | -0.16 | 4.33E-01 |
| <b>PCDHAC2</b>         | -0.05 | 7.87E-01 | -0.16 | 4.33E-01 |
| <b>PMP2</b>            | -0.01 | 9.44E-01 | -0.16 | 4.33E-01 |
| <b>RP11-218E20.5</b>   | 0.21  | 2.76E-01 | -0.16 | 4.33E-01 |
| <b>RP11-47F1.1</b>     | 0.04  | 8.37E-01 | -0.16 | 4.33E-01 |
| <b>RP11-546J1.1</b>    | 0.09  | 6.43E-01 | -0.16 | 4.33E-01 |
| <b>RP11-70P17.1</b>    | 0.02  | 9.23E-01 | -0.16 | 4.33E-01 |
| <b>TCAF1</b>           | 0.08  | 6.89E-01 | -0.16 | 4.33E-01 |
| <b>CGREF1</b>          | 0.22  | 2.50E-01 | 0.16  | 4.33E-01 |
| <b>CHGA</b>            | -0.01 | 9.48E-01 | 0.16  | 4.33E-01 |
| <b>IQCH-AS1</b>        | 0.23  | 2.43E-01 | 0.16  | 4.33E-01 |
| <b>KCNJ8</b>           | 0.02  | 9.08E-01 | 0.16  | 4.33E-01 |
| <b>NDUFS5P1</b>        | -0.20 | 3.15E-01 | 0.16  | 4.33E-01 |
| <b>PLCXD3</b>          | -0.12 | 5.59E-01 | 0.16  | 4.33E-01 |
| <b>RP11-104L21.2</b>   | -0.05 | 7.86E-01 | 0.16  | 4.33E-01 |
| <b>RP11-185E12.2</b>   | -0.29 | 1.33E-01 | 0.16  | 4.33E-01 |
| <b>RP11-8L18.2</b>     | -0.43 | 2.26E-02 | 0.16  | 4.33E-01 |
| <b>S100A11</b>         | 0.12  | 5.32E-01 | 0.16  | 4.33E-01 |
| <b>SEMA7A</b>          | 0.28  | 1.51E-01 | 0.16  | 4.33E-01 |
| <b>TPST2</b>           | -0.13 | 5.08E-01 | 0.16  | 4.33E-01 |
| <b>AL022344.7</b>      | 0.25  | 2.02E-01 | -0.16 | 4.34E-01 |
| <b>EFCAB7</b>          | -0.10 | 6.11E-01 | -0.16 | 4.34E-01 |
| <b>FLJ37035</b>        | -0.19 | 3.41E-01 | -0.16 | 4.34E-01 |

|               |       |          |       |          |
|---------------|-------|----------|-------|----------|
| KATNAL2       | -0.02 | 9.03E-01 | -0.16 | 4.34E-01 |
| OR7E121P      | 0.41  | 3.23E-02 | -0.16 | 4.34E-01 |
| PILRB         | 0.13  | 5.04E-01 | -0.16 | 4.34E-01 |
| RP11-329J18.4 | 0.23  | 2.43E-01 | -0.16 | 4.34E-01 |
| RP11-762I7.5  | 0.19  | 3.44E-01 | -0.16 | 4.34E-01 |
| SMURF1        | -0.21 | 2.87E-01 | -0.16 | 4.34E-01 |
| SNORD113      | -0.18 | 3.62E-01 | -0.16 | 4.34E-01 |
| ABCB5         | 0.00  | 9.81E-01 | 0.16  | 4.34E-01 |
| AC007238.1    | -0.18 | 3.60E-01 | 0.16  | 4.34E-01 |
| OXSM          | 0.14  | 4.83E-01 | 0.16  | 4.34E-01 |
| PC            | 0.17  | 3.98E-01 | 0.16  | 4.34E-01 |
| POLR2G        | 0.06  | 7.63E-01 | 0.16  | 4.34E-01 |
| RBM10         | -0.06 | 7.54E-01 | 0.16  | 4.34E-01 |
| RP11-391M20.1 | -0.28 | 1.55E-01 | 0.16  | 4.34E-01 |
| S100P         | 0.19  | 3.22E-01 | 0.16  | 4.34E-01 |
| STRN3         | 0.35  | 6.46E-02 | 0.16  | 4.34E-01 |
| TECRP1        | -0.08 | 6.69E-01 | 0.16  | 4.34E-01 |
| VPREB3        | -0.18 | 3.58E-01 | 0.16  | 4.34E-01 |
| AC093818.1    | 0.26  | 1.83E-01 | 0.16  | 4.35E-01 |
| C16orf45      | 0.10  | 6.25E-01 | 0.16  | 4.35E-01 |
| CDK20         | 0.18  | 3.70E-01 | 0.16  | 4.35E-01 |
| COLCA2        | 0.12  | 5.57E-01 | 0.16  | 4.35E-01 |
| CRYL1         | 0.41  | 3.24E-02 | 0.16  | 4.35E-01 |
| FAM117B       | 0.08  | 7.04E-01 | 0.16  | 4.35E-01 |
| G10617        | -0.23 | 2.34E-01 | -0.16 | 4.35E-01 |
| GRIA2         | -0.09 | 6.63E-01 | -0.16 | 4.35E-01 |
| HNRNPCP1      | 0.29  | 1.31E-01 | 0.16  | 4.35E-01 |
| LRRC75B       | 0.06  | 7.69E-01 | 0.16  | 4.35E-01 |
| PLEKHA2       | 0.26  | 1.74E-01 | 0.16  | 4.35E-01 |
| PRKACA        | 0.31  | 1.09E-01 | 0.16  | 4.35E-01 |
| PTPN2P1       | -0.13 | 5.26E-01 | 0.16  | 4.35E-01 |
| RNF122        | 0.22  | 2.57E-01 | 0.16  | 4.35E-01 |
| RP11-12D24.6  | -0.27 | 1.60E-01 | -0.16 | 4.35E-01 |
| RP11-44F21.4  | 0.13  | 5.23E-01 | 0.16  | 4.35E-01 |
| RP11-457M11.5 | -0.04 | 8.32E-01 | -0.16 | 4.35E-01 |
| RP11-481F24.3 | -0.14 | 4.86E-01 | -0.16 | 4.35E-01 |
| RP11-708B6.2  | -0.09 | 6.62E-01 | -0.16 | 4.35E-01 |
| RP11-764K9.1  | 0.13  | 5.02E-01 | -0.16 | 4.35E-01 |
| TSPEAR-AS2    | -0.12 | 5.32E-01 | 0.16  | 4.35E-01 |
| AC016735.1    | -0.16 | 4.21E-01 | -0.16 | 4.36E-01 |
| ARHGEF9-IT1   | -0.08 | 6.83E-01 | 0.16  | 4.36E-01 |
| ATL1          | -0.35 | 6.73E-02 | -0.16 | 4.36E-01 |
| ATXN1L        | 0.02  | 9.10E-01 | 0.16  | 4.36E-01 |
| C4orf45       | -0.09 | 6.54E-01 | 0.16  | 4.36E-01 |
| CDR1          | -0.16 | 4.08E-01 | -0.16 | 4.36E-01 |
| CH17-373J23.1 | -0.13 | 4.94E-01 | 0.16  | 4.36E-01 |
| CRB2          | -0.25 | 2.08E-01 | -0.16 | 4.36E-01 |

|                      |       |          |       |          |
|----------------------|-------|----------|-------|----------|
| <b>CTD-2521M24.6</b> | 0.12  | 5.55E-01 | -0.16 | 4.36E-01 |
| <b>DTNB</b>          | 0.20  | 2.99E-01 | 0.16  | 4.36E-01 |
| <b>EMILIN3</b>       | 0.12  | 5.30E-01 | -0.16 | 4.36E-01 |
| <b>FAM81B</b>        | -0.26 | 1.88E-01 | -0.16 | 4.36E-01 |
| <b>G19654</b>        | 0.18  | 3.68E-01 | 0.16  | 4.36E-01 |
| <b>GK-AS1</b>        | 0.44  | 1.89E-02 | -0.16 | 4.36E-01 |
| <b>HMG20B</b>        | -0.02 | 9.39E-01 | -0.16 | 4.36E-01 |
| <b>KCTD9</b>         | 0.19  | 3.36E-01 | -0.16 | 4.36E-01 |
| <b>MDM2</b>          | 0.38  | 4.68E-02 | -0.16 | 4.36E-01 |
| <b>MGAT2</b>         | 0.25  | 1.93E-01 | -0.16 | 4.36E-01 |
| <b>PQLC3</b>         | -0.10 | 6.07E-01 | 0.16  | 4.36E-01 |
| <b>PXMP2</b>         | -0.09 | 6.44E-01 | 0.16  | 4.36E-01 |
| <b>RP11-136H19.1</b> | 0.22  | 2.71E-01 | 0.16  | 4.36E-01 |
| <b>RP11-214N15.5</b> | 0.10  | 6.19E-01 | -0.16 | 4.36E-01 |
| <b>RP11-480C16.1</b> | -0.33 | 8.34E-02 | -0.16 | 4.36E-01 |
| <b>RP11-562A8.4</b>  | 0.19  | 3.42E-01 | -0.16 | 4.36E-01 |
| <b>RP3-468O1.6</b>   | -0.03 | 8.76E-01 | -0.16 | 4.36E-01 |
| <b>SAC3D1</b>        | -0.01 | 9.64E-01 | 0.16  | 4.36E-01 |
| <b>SOX4</b>          | 0.13  | 5.20E-01 | -0.16 | 4.36E-01 |
| <b>STAM-AS1</b>      | 0.10  | 6.02E-01 | -0.16 | 4.36E-01 |
| <b>TMEM169</b>       | 0.03  | 8.64E-01 | -0.16 | 4.36E-01 |
| <b>VAR52</b>         | 0.11  | 5.91E-01 | 0.16  | 4.36E-01 |
| <b>WDR97</b>         | 0.21  | 2.73E-01 | -0.16 | 4.36E-01 |
| <b>C4orf32</b>       | -0.09 | 6.47E-01 | -0.16 | 4.37E-01 |
| <b>CTA-246H3.8</b>   | 0.01  | 9.79E-01 | -0.16 | 4.37E-01 |
| <b>CTA-941F9.10</b>  | -0.01 | 9.70E-01 | -0.16 | 4.37E-01 |
| <b>CTD-2561J22.5</b> | -0.08 | 6.79E-01 | -0.16 | 4.37E-01 |
| <b>DCK</b>           | 0.05  | 8.16E-01 | -0.16 | 4.37E-01 |
| <b>GALNT16</b>       | -0.37 | 5.58E-02 | -0.16 | 4.37E-01 |
| <b>MDGA1</b>         | 0.41  | 2.91E-02 | -0.16 | 4.37E-01 |
| <b>PPP1R1C</b>       | 0.10  | 5.97E-01 | -0.16 | 4.37E-01 |
| <b>RNF141</b>        | 0.06  | 7.72E-01 | -0.16 | 4.37E-01 |
| <b>RP11-20I23.8</b>  | -0.24 | 2.14E-01 | -0.16 | 4.37E-01 |
| <b>RP11-568K15.2</b> | -0.18 | 3.70E-01 | -0.16 | 4.37E-01 |
| <b>RP11-640N20.4</b> | 0.14  | 4.65E-01 | -0.16 | 4.37E-01 |
| <b>SYT1</b>          | -0.01 | 9.60E-01 | -0.16 | 4.37E-01 |
| <b>TPRKB</b>         | 0.12  | 5.39E-01 | -0.16 | 4.37E-01 |
| <b>C7orf61</b>       | -0.08 | 6.68E-01 | 0.16  | 4.37E-01 |
| <b>IL2RB</b>         | 0.07  | 7.20E-01 | 0.16  | 4.37E-01 |
| <b>NEK2</b>          | 0.20  | 3.02E-01 | 0.16  | 4.37E-01 |
| <b>PSMD5</b>         | 0.05  | 7.88E-01 | 0.16  | 4.37E-01 |
| <b>RN7SL574P</b>     | -0.07 | 7.09E-01 | 0.16  | 4.37E-01 |
| <b>RP11-466A19.8</b> | -0.10 | 5.97E-01 | 0.16  | 4.37E-01 |
| <b>SLC35B4</b>       | 0.29  | 1.40E-01 | 0.16  | 4.37E-01 |
| <b>SLC38A5</b>       | -0.02 | 9.36E-01 | 0.16  | 4.37E-01 |
| <b>WWTR1-IT1</b>     | -0.29 | 1.35E-01 | 0.16  | 4.37E-01 |
| <b>ADH6</b>          | -0.46 | 1.33E-02 | -0.16 | 4.38E-01 |

|                |       |          |       |          |
|----------------|-------|----------|-------|----------|
| ANXA2P2        | -0.12 | 5.39E-01 | 0.16  | 4.38E-01 |
| BBS9           | -0.17 | 4.00E-01 | -0.16 | 4.38E-01 |
| CROCCP3        | -0.09 | 6.54E-01 | -0.16 | 4.38E-01 |
| CTD-2337A12.1  | 0.07  | 7.11E-01 | -0.16 | 4.38E-01 |
| CTD-2583A14.11 | 0.36  | 5.64E-02 | 0.16  | 4.38E-01 |
| DGKG           | 0.12  | 5.53E-01 | 0.16  | 4.38E-01 |
| DOCK9-AS2      | 0.07  | 7.40E-01 | 0.16  | 4.38E-01 |
| DOPEY2         | 0.08  | 6.97E-01 | 0.16  | 4.38E-01 |
| GLG1           | 0.16  | 4.03E-01 | 0.16  | 4.38E-01 |
| LAMC1          | -0.12 | 5.36E-01 | -0.16 | 4.38E-01 |
| MRPL4          | 0.18  | 3.67E-01 | 0.16  | 4.38E-01 |
| MRPS6          | 0.13  | 5.20E-01 | 0.16  | 4.38E-01 |
| NLRC3          | 0.15  | 4.34E-01 | 0.16  | 4.38E-01 |
| PRR15          | 0.38  | 4.80E-02 | -0.16 | 4.38E-01 |
| RAET1G         | 0.35  | 6.50E-02 | 0.16  | 4.38E-01 |
| RFFL           | 0.03  | 8.86E-01 | 0.16  | 4.38E-01 |
| RP11-561N12.1  | 0.10  | 6.03E-01 | -0.16 | 4.38E-01 |
| RP11-930O11.1  | -0.23 | 2.44E-01 | -0.16 | 4.38E-01 |
| RP13-15M17.1   | 0.30  | 1.20E-01 | 0.16  | 4.38E-01 |
| TAF1B          | 0.31  | 1.05E-01 | -0.16 | 4.38E-01 |
| TBCE           | -0.01 | 9.49E-01 | -0.16 | 4.38E-01 |
| THBS1          | -0.06 | 7.64E-01 | 0.16  | 4.38E-01 |
| AC000120.7     | -0.04 | 8.50E-01 | -0.16 | 4.39E-01 |
| AC001226.7     | -0.13 | 4.99E-01 | 0.16  | 4.39E-01 |
| ARAF           | 0.35  | 6.77E-02 | 0.16  | 4.39E-01 |
| CAPN3          | -0.32 | 9.84E-02 | -0.16 | 4.39E-01 |
| EGFL7          | -0.19 | 3.44E-01 | -0.16 | 4.39E-01 |
| FN1            | -0.40 | 3.47E-02 | -0.16 | 4.39E-01 |
| KANSL1L        | -0.36 | 6.09E-02 | -0.16 | 4.39E-01 |
| LINC00657      | 0.00  | 9.94E-01 | -0.16 | 4.39E-01 |
| MSH4           | -0.30 | 1.16E-01 | -0.16 | 4.39E-01 |
| NAT8L          | -0.39 | 4.15E-02 | -0.16 | 4.39E-01 |
| POC1A          | 0.05  | 7.85E-01 | 0.16  | 4.39E-01 |
| PSMF1          | 0.07  | 7.40E-01 | 0.16  | 4.39E-01 |
| PUSL1          | -0.02 | 9.22E-01 | 0.16  | 4.39E-01 |
| RBFOX3         | -0.23 | 2.29E-01 | 0.16  | 4.39E-01 |
| RN7SL113P      | -0.39 | 4.20E-02 | 0.16  | 4.39E-01 |
| RP11-338E21.2  | 0.07  | 7.19E-01 | 0.16  | 4.39E-01 |
| RP11-383C5.5   | 0.13  | 5.10E-01 | -0.16 | 4.39E-01 |
| RP11-401P9.1   | -0.34 | 7.46E-02 | -0.16 | 4.39E-01 |
| RP11-455G16.1  | 0.30  | 1.18E-01 | -0.16 | 4.39E-01 |
| RP11-55L3.1    | 0.17  | 3.78E-01 | -0.16 | 4.39E-01 |
| RP11-6L6.4     | -0.26 | 1.89E-01 | -0.16 | 4.39E-01 |
| RP11-757F18.3  | -0.10 | 6.01E-01 | 0.16  | 4.39E-01 |
| RP11-761I4.4   | 0.24  | 2.20E-01 | 0.16  | 4.39E-01 |
| RP11-855O10.2  | 0.21  | 2.75E-01 | -0.16 | 4.39E-01 |
| RP11-981P6.1   | 0.05  | 8.04E-01 | -0.16 | 4.39E-01 |

|               |       |          |       |          |
|---------------|-------|----------|-------|----------|
| RPS10         | 0.18  | 3.62E-01 | -0.16 | 4.39E-01 |
| RPS2P44       | 0.07  | 7.16E-01 | 0.16  | 4.39E-01 |
| SPDYE5        | -0.23 | 2.44E-01 | -0.16 | 4.39E-01 |
| XLOC_004195   | 0.11  | 5.82E-01 | 0.16  | 4.39E-01 |
| XYLT1         | 0.31  | 1.10E-01 | -0.16 | 4.39E-01 |
| AC005392.13   | 0.45  | 1.51E-02 | -0.16 | 4.40E-01 |
| AC010877.1    | 0.30  | 1.23E-01 | 0.16  | 4.40E-01 |
| AC074289.1    | -0.45 | 1.63E-02 | -0.16 | 4.40E-01 |
| APOL4         | 0.08  | 6.81E-01 | 0.16  | 4.40E-01 |
| BTBD19        | -0.02 | 9.22E-01 | 0.16  | 4.40E-01 |
| CD320         | 0.08  | 7.01E-01 | 0.16  | 4.40E-01 |
| CREB3         | -0.15 | 4.48E-01 | 0.16  | 4.40E-01 |
| CTC-436P18.1  | -0.04 | 8.28E-01 | -0.16 | 4.40E-01 |
| CTD-2231E14.2 | -0.38 | 4.49E-02 | 0.16  | 4.40E-01 |
| CTD-3193K9.1  | -0.04 | 8.29E-01 | -0.16 | 4.40E-01 |
| HAAO          | -0.21 | 2.80E-01 | -0.16 | 4.40E-01 |
| IGSF9         | -0.01 | 9.61E-01 | 0.16  | 4.40E-01 |
| LCT           | 0.29  | 1.41E-01 | -0.16 | 4.40E-01 |
| MRPL33        | 0.04  | 8.43E-01 | -0.16 | 4.40E-01 |
| NDUFA5P2      | 0.05  | 8.19E-01 | 0.16  | 4.40E-01 |
| PLCZ1         | -0.29 | 1.29E-01 | -0.16 | 4.40E-01 |
| RNU6-1033P    | -0.22 | 2.70E-01 | -0.16 | 4.40E-01 |
| RP11-392A14.8 | -0.07 | 7.24E-01 | -0.16 | 4.40E-01 |
| RP11-618M23.5 | 0.02  | 9.38E-01 | -0.16 | 4.40E-01 |
| RP11-6O2.3    | -0.22 | 2.66E-01 | 0.16  | 4.40E-01 |
| RP11-80I15.4  | 0.05  | 7.95E-01 | -0.16 | 4.40E-01 |
| RP13-216E22.4 | -0.01 | 9.75E-01 | -0.16 | 4.40E-01 |
| RP3-405J10.2  | 0.10  | 6.18E-01 | 0.16  | 4.40E-01 |
| RP5-892K4.1   | 0.06  | 7.79E-01 | -0.16 | 4.40E-01 |
| RPL23AP83     | -0.04 | 8.41E-01 | 0.16  | 4.40E-01 |
| RPS17         | 0.12  | 5.32E-01 | 0.16  | 4.40E-01 |
| RSF1-IT1      | -0.42 | 2.54E-02 | -0.16 | 4.40E-01 |
| SCN5A         | -0.19 | 3.22E-01 | -0.16 | 4.40E-01 |
| SEMA3C        | 0.08  | 6.93E-01 | 0.16  | 4.40E-01 |
| TCEA1P4       | 0.20  | 3.10E-01 | -0.16 | 4.40E-01 |
| UBE2V2P3      | 0.08  | 6.79E-01 | 0.16  | 4.40E-01 |
| XLOC_007698   | -0.28 | 1.51E-01 | -0.16 | 4.40E-01 |
| XLOC_014378   | -0.01 | 9.68E-01 | -0.16 | 4.40E-01 |
| AC069257.6    | 0.08  | 6.87E-01 | 0.15  | 4.41E-01 |
| EIF2B4        | 0.07  | 7.06E-01 | 0.15  | 4.41E-01 |
| FMO6P         | -0.05 | 8.10E-01 | 0.15  | 4.41E-01 |
| G32068        | -0.12 | 5.46E-01 | 0.15  | 4.41E-01 |
| LINC01271     | 0.04  | 8.53E-01 | 0.15  | 4.41E-01 |
| MIR301A       | 0.07  | 7.37E-01 | 0.15  | 4.41E-01 |
| RP11-22B10.3  | -0.18 | 3.55E-01 | 0.15  | 4.41E-01 |
| ZNF714        | -0.09 | 6.41E-01 | 0.15  | 4.41E-01 |
| ZNF878        | -0.01 | 9.61E-01 | 0.15  | 4.41E-01 |

|               |       |          |       |          |
|---------------|-------|----------|-------|----------|
| AC105461.1    | -0.03 | 8.86E-01 | -0.15 | 4.41E-01 |
| ALG1L10P      | 0.11  | 5.75E-01 | -0.15 | 4.41E-01 |
| BEND7P1       | -0.25 | 2.05E-01 | -0.15 | 4.41E-01 |
| DSTYK         | -0.15 | 4.40E-01 | -0.15 | 4.41E-01 |
| FSTL3         | -0.26 | 1.79E-01 | -0.15 | 4.41E-01 |
| LMBRD1        | -0.03 | 8.91E-01 | -0.15 | 4.41E-01 |
| MAPK15        | -0.17 | 3.98E-01 | -0.15 | 4.41E-01 |
| P3H2-AS1      | -0.11 | 5.78E-01 | -0.15 | 4.41E-01 |
| PDIA2         | -0.05 | 8.08E-01 | -0.15 | 4.41E-01 |
| RN7SKP70      | 0.17  | 3.76E-01 | -0.15 | 4.41E-01 |
| RP11-407N17.4 | -0.20 | 3.11E-01 | -0.15 | 4.41E-01 |
| RP11-481H12.1 | -0.05 | 7.84E-01 | -0.15 | 4.41E-01 |
| RP11-763F8.1  | -0.09 | 6.38E-01 | -0.15 | 4.41E-01 |
| RP11-90E5.1   | 0.04  | 8.45E-01 | -0.15 | 4.41E-01 |
| TMEM5         | -0.04 | 8.28E-01 | -0.15 | 4.41E-01 |
| ZNF329        | -0.20 | 3.07E-01 | -0.15 | 4.41E-01 |
| 5S_rRNA       | -0.04 | 8.49E-01 | -0.15 | 4.41E-01 |
| ABT1          | -0.06 | 7.63E-01 | -0.15 | 4.41E-01 |
| CCL20         | 0.31  | 1.11E-01 | 0.15  | 4.41E-01 |
| CCNB2         | 0.18  | 3.57E-01 | 0.15  | 4.41E-01 |
| CTC-350I8.1   | -0.05 | 7.94E-01 | -0.15 | 4.41E-01 |
| DEFB109P1B    | -0.01 | 9.55E-01 | 0.15  | 4.41E-01 |
| FLNB-AS1      | 0.01  | 9.55E-01 | -0.15 | 4.41E-01 |
| GPRC5D        | 0.24  | 2.25E-01 | -0.15 | 4.41E-01 |
| GUSBP3        | 0.03  | 8.91E-01 | 0.15  | 4.41E-01 |
| KAT6A         | -0.26 | 1.85E-01 | -0.15 | 4.41E-01 |
| 1-Mar         | -0.04 | 8.58E-01 | -0.15 | 4.41E-01 |
| MIR1245A      | -0.15 | 4.54E-01 | -0.15 | 4.41E-01 |
| NME9          | -0.16 | 4.15E-01 | -0.15 | 4.41E-01 |
| RNU6-69P      | -0.08 | 6.82E-01 | -0.15 | 4.41E-01 |
| RP11-359E3.4  | -0.11 | 5.74E-01 | -0.15 | 4.41E-01 |
| RP11-424G14.1 | 0.41  | 3.10E-02 | 0.15  | 4.41E-01 |
| RP11-447H19.3 | 0.00  | 9.97E-01 | -0.15 | 4.41E-01 |
| RP3-405J10.3  | 0.14  | 4.65E-01 | 0.15  | 4.41E-01 |
| RPL12         | 0.26  | 1.79E-01 | -0.15 | 4.41E-01 |
| SUB1P1        | 0.13  | 5.16E-01 | -0.15 | 4.41E-01 |
| TGFA-IT1      | -0.39 | 4.26E-02 | 0.15  | 4.41E-01 |
| VPS25         | 0.20  | 2.99E-01 | 0.15  | 4.41E-01 |
| WDR63         | -0.23 | 2.34E-01 | -0.15 | 4.41E-01 |
| ZSCAN12P1     | -0.30 | 1.27E-01 | 0.15  | 4.41E-01 |
| AC078883.4    | 0.22  | 2.55E-01 | 0.15  | 4.42E-01 |
| KIAA1107      | -0.04 | 8.51E-01 | 0.15  | 4.42E-01 |
| MIR619        | 0.18  | 3.57E-01 | 0.15  | 4.42E-01 |
| ORMDL2        | 0.02  | 9.13E-01 | 0.15  | 4.42E-01 |
| PEX11B        | 0.05  | 8.04E-01 | 0.15  | 4.42E-01 |
| PRRX1         | -0.19 | 3.22E-01 | 0.15  | 4.42E-01 |
| RGS5          | 0.13  | 5.16E-01 | 0.15  | 4.42E-01 |



|                       |       |          |       |          |
|-----------------------|-------|----------|-------|----------|
| <b>RNF165</b>         | 0.14  | 4.74E-01 | 0.15  | 4.42E-01 |
| <b>RNVU1-20</b>       | 0.16  | 4.28E-01 | 0.15  | 4.42E-01 |
| <b>RP11-680G24.4</b>  | 0.17  | 3.98E-01 | 0.15  | 4.42E-01 |
| <b>RP4-529N6.2</b>    | 0.51  | 5.21E-03 | 0.15  | 4.42E-01 |
| <b>ZNF511</b>         | -0.05 | 8.04E-01 | 0.15  | 4.42E-01 |
| <b>AC002064.5</b>     | -0.42 | 2.45E-02 | -0.15 | 4.42E-01 |
| <b>ASS1P12</b>        | 0.03  | 8.63E-01 | -0.15 | 4.42E-01 |
| <b>C8orf74</b>        | 0.00  | 9.91E-01 | -0.15 | 4.42E-01 |
| <b>DDX20</b>          | 0.22  | 2.65E-01 | -0.15 | 4.42E-01 |
| <b>DLX1</b>           | 0.09  | 6.40E-01 | -0.15 | 4.42E-01 |
| <b>LRRTM2</b>         | -0.19 | 3.21E-01 | -0.15 | 4.42E-01 |
| <b>MRS2</b>           | 0.31  | 1.13E-01 | -0.15 | 4.42E-01 |
| <b>RNU6-238P</b>      | 0.09  | 6.41E-01 | -0.15 | 4.42E-01 |
| <b>RP1-152L7.5</b>    | -0.21 | 2.82E-01 | -0.15 | 4.42E-01 |
| <b>RP11-3304.1</b>    | -0.10 | 6.23E-01 | -0.15 | 4.42E-01 |
| <b>RP11-343L5.2</b>   | -0.28 | 1.53E-01 | -0.15 | 4.42E-01 |
| <b>RP11-701H24.4</b>  | 0.17  | 3.85E-01 | -0.15 | 4.42E-01 |
| <b>RP11-75C10.6</b>   | 0.09  | 6.37E-01 | -0.15 | 4.42E-01 |
| <b>RP11-88E10.4</b>   | 0.20  | 3.01E-01 | -0.15 | 4.42E-01 |
| <b>RP5-1050D4.4</b>   | 0.08  | 6.68E-01 | -0.15 | 4.42E-01 |
| <b>RPL36A</b>         | -0.11 | 5.62E-01 | -0.15 | 4.42E-01 |
| <b>WNT9A</b>          | -0.30 | 1.25E-01 | -0.15 | 4.42E-01 |
| <b>hsa-mir-150</b>    | 0.04  | 8.45E-01 | -0.15 | 4.42E-01 |
| <b>ACAP1</b>          | -0.03 | 8.80E-01 | 0.15  | 4.43E-01 |
| <b>ARL10</b>          | 0.03  | 8.74E-01 | 0.15  | 4.43E-01 |
| <b>BZW2</b>           | 0.29  | 1.31E-01 | -0.15 | 4.43E-01 |
| <b>CTB-73N10.1</b>    | -0.17 | 3.90E-01 | -0.15 | 4.43E-01 |
| <b>FYTTD1</b>         | -0.01 | 9.50E-01 | -0.15 | 4.43E-01 |
| <b>HOXA13</b>         | -0.13 | 5.00E-01 | 0.15  | 4.43E-01 |
| <b>KIAA1468</b>       | 0.02  | 9.05E-01 | -0.15 | 4.43E-01 |
| <b>KLHL28</b>         | -0.11 | 5.64E-01 | -0.15 | 4.43E-01 |
| <b>LLNLR-470E3.1</b>  | -0.14 | 4.72E-01 | 0.15  | 4.43E-01 |
| <b>MIR4480</b>        | -0.09 | 6.46E-01 | 0.15  | 4.43E-01 |
| <b>NDUFA9</b>         | 0.08  | 6.73E-01 | -0.15 | 4.43E-01 |
| <b>NR1I3</b>          | -0.16 | 4.24E-01 | -0.15 | 4.43E-01 |
| <b>NSF</b>            | 0.21  | 2.80E-01 | 0.15  | 4.43E-01 |
| <b>RGL2</b>           | 0.10  | 6.15E-01 | 0.15  | 4.43E-01 |
| <b>RHBDL2</b>         | -0.20 | 3.19E-01 | 0.15  | 4.43E-01 |
| <b>RP11-310J24.3</b>  | -0.02 | 9.09E-01 | 0.15  | 4.43E-01 |
| <b>RP11-326I11.3</b>  | 0.40  | 3.28E-02 | 0.15  | 4.43E-01 |
| <b>RP11-351J23.1</b>  | -0.09 | 6.44E-01 | 0.15  | 4.43E-01 |
| <b>RP11-399K21.12</b> | 0.06  | 7.73E-01 | -0.15 | 4.43E-01 |
| <b>RP11-775D22.2</b>  | 0.06  | 7.79E-01 | -0.15 | 4.43E-01 |
| <b>RPL29P14</b>       | -0.01 | 9.78E-01 | 0.15  | 4.43E-01 |
| <b>SHANK1</b>         | -0.17 | 3.95E-01 | -0.15 | 4.43E-01 |
| <b>SLC5A6</b>         | 0.28  | 1.48E-01 | 0.15  | 4.43E-01 |
| <b>SOX1</b>           | -0.15 | 4.45E-01 | -0.15 | 4.43E-01 |

|               |       |          |       |          |
|---------------|-------|----------|-------|----------|
| TECRL         | 0.26  | 1.90E-01 | -0.15 | 4.43E-01 |
| TFCP2         | 0.01  | 9.46E-01 | 0.15  | 4.43E-01 |
| THEM5         | -0.16 | 4.02E-01 | 0.15  | 4.43E-01 |
| WBP1LP2       | 0.16  | 4.04E-01 | 0.15  | 4.43E-01 |
| C14orf159     | 0.26  | 1.78E-01 | 0.15  | 4.44E-01 |
| CHADL         | -0.10 | 6.22E-01 | -0.15 | 4.44E-01 |
| CLPTM1        | 0.34  | 7.77E-02 | 0.15  | 4.44E-01 |
| COL4A6        | 0.15  | 4.54E-01 | 0.15  | 4.44E-01 |
| CRTAM         | 0.22  | 2.54E-01 | 0.15  | 4.44E-01 |
| CTC-268N12.2  | -0.11 | 5.93E-01 | 0.15  | 4.44E-01 |
| CTD-3195I5.3  | 0.17  | 3.95E-01 | -0.15 | 4.44E-01 |
| IDI1          | 0.21  | 2.85E-01 | -0.15 | 4.44E-01 |
| MIR1254-1     | 0.18  | 3.55E-01 | -0.15 | 4.44E-01 |
| MIR5690       | -0.23 | 2.50E-01 | 0.15  | 4.44E-01 |
| MXI1          | -0.01 | 9.47E-01 | 0.15  | 4.44E-01 |
| PIK3R1        | 0.15  | 4.51E-01 | 0.15  | 4.44E-01 |
| PIM3          | -0.16 | 4.08E-01 | -0.15 | 4.44E-01 |
| RHOG          | 0.27  | 1.59E-01 | 0.15  | 4.44E-01 |
| RP11-32B5.7   | -0.11 | 5.71E-01 | -0.15 | 4.44E-01 |
| RP11-462G2.1  | 0.26  | 1.82E-01 | -0.15 | 4.44E-01 |
| RP11-483I13.6 | 0.34  | 7.24E-02 | 0.15  | 4.44E-01 |
| RP11-505P4.7  | -0.01 | 9.51E-01 | -0.15 | 4.44E-01 |
| RP11-512F24.1 | 0.16  | 4.24E-01 | 0.15  | 4.44E-01 |
| RP5-1180D12.1 | 0.13  | 5.12E-01 | 0.15  | 4.44E-01 |
| RP5-894A10.6  | 0.04  | 8.28E-01 | -0.15 | 4.44E-01 |
| SNF8          | 0.01  | 9.42E-01 | -0.15 | 4.44E-01 |
| SPTBN4        | -0.10 | 6.17E-01 | -0.15 | 4.44E-01 |
| TTF2          | 0.00  | 9.93E-01 | -0.15 | 4.44E-01 |
| TUBB3         | -0.05 | 7.88E-01 | 0.15  | 4.44E-01 |
| UBE2C         | 0.21  | 2.91E-01 | 0.15  | 4.44E-01 |
| USP15         | -0.11 | 5.82E-01 | -0.15 | 4.44E-01 |
| ZKSCAN3       | -0.02 | 9.06E-01 | 0.15  | 4.44E-01 |
| ZNRF3         | -0.11 | 5.92E-01 | -0.15 | 4.44E-01 |
| AACS          | 0.06  | 7.62E-01 | -0.15 | 4.45E-01 |
| ADH1B         | -0.06 | 7.69E-01 | -0.15 | 4.45E-01 |
| CAPRIN1       | 0.18  | 3.55E-01 | 0.15  | 4.45E-01 |
| CDH5          | -0.15 | 4.53E-01 | 0.15  | 4.45E-01 |
| CENPL         | 0.10  | 6.18E-01 | -0.15 | 4.45E-01 |
| CTD-2553L13.9 | -0.19 | 3.44E-01 | 0.15  | 4.45E-01 |
| DDX18P5       | -0.33 | 8.78E-02 | -0.15 | 4.45E-01 |
| EMG1          | 0.02  | 9.37E-01 | 0.15  | 4.45E-01 |
| ENPP2         | -0.37 | 5.33E-02 | -0.15 | 4.45E-01 |
| GEMIN8        | -0.54 | 2.78E-03 | -0.15 | 4.45E-01 |
| GTF2IRD2      | -0.13 | 4.97E-01 | -0.15 | 4.45E-01 |
| HMGCL         | 0.22  | 2.68E-01 | 0.15  | 4.45E-01 |
| IL1B          | 0.27  | 1.62E-01 | 0.15  | 4.45E-01 |
| ITGB6         | 0.29  | 1.42E-01 | 0.15  | 4.45E-01 |

|               |       |          |       |          |
|---------------|-------|----------|-------|----------|
| KDM5C         | -0.13 | 5.02E-01 | -0.15 | 4.45E-01 |
| LGI4          | -0.40 | 3.39E-02 | -0.15 | 4.45E-01 |
| LMAN1         | 0.18  | 3.53E-01 | -0.15 | 4.45E-01 |
| NPIPA1        | -0.09 | 6.49E-01 | -0.15 | 4.45E-01 |
| NRN1          | 0.06  | 7.55E-01 | 0.15  | 4.45E-01 |
| PITPNM3       | -0.04 | 8.37E-01 | 0.15  | 4.45E-01 |
| POLR1A        | 0.26  | 1.85E-01 | 0.15  | 4.45E-01 |
| RASA4         | -0.06 | 7.80E-01 | -0.15 | 4.45E-01 |
| RNU6-314P     | 0.22  | 2.70E-01 | -0.15 | 4.45E-01 |
| RP11-452L6.5  | 0.22  | 2.70E-01 | 0.15  | 4.45E-01 |
| RP11-49C9.2   | 0.02  | 9.06E-01 | -0.15 | 4.45E-01 |
| RP11-570G20.1 | -0.18 | 3.56E-01 | -0.15 | 4.45E-01 |
| RP11-638I2.2  | 0.09  | 6.63E-01 | 0.15  | 4.45E-01 |
| RP11-96D1.8   | -0.27 | 1.68E-01 | -0.15 | 4.45E-01 |
| SPATA25       | 0.01  | 9.61E-01 | -0.15 | 4.45E-01 |
| SPTSSA        | 0.22  | 2.59E-01 | 0.15  | 4.45E-01 |
| TFRC          | 0.25  | 1.92E-01 | -0.15 | 4.45E-01 |
| TMEM38B       | -0.01 | 9.70E-01 | -0.15 | 4.45E-01 |
| XLOC_005513   | -0.03 | 8.93E-01 | -0.15 | 4.45E-01 |
| ABCC8         | -0.21 | 2.92E-01 | -0.15 | 4.46E-01 |
| ASCC2         | 0.05  | 7.83E-01 | 0.15  | 4.46E-01 |
| CCDC39        | -0.27 | 1.68E-01 | -0.15 | 4.46E-01 |
| CFLAR-AS1     | 0.18  | 3.68E-01 | -0.15 | 4.46E-01 |
| CHCHD6        | 0.10  | 6.12E-01 | 0.15  | 4.46E-01 |
| COPS6         | 0.17  | 3.92E-01 | 0.15  | 4.46E-01 |
| CTB-66B24.1   | -0.05 | 8.03E-01 | -0.15 | 4.46E-01 |
| DIO1          | -0.02 | 9.15E-01 | 0.15  | 4.46E-01 |
| DRD1          | -0.37 | 4.98E-02 | -0.15 | 4.46E-01 |
| FITM1         | 0.02  | 9.06E-01 | 0.15  | 4.46E-01 |
| FLT3          | 0.04  | 8.54E-01 | 0.15  | 4.46E-01 |
| GLRX3P2       | -0.05 | 8.16E-01 | -0.15 | 4.46E-01 |
| GMPPA         | 0.05  | 7.84E-01 | 0.15  | 4.46E-01 |
| GTF2F1        | 0.22  | 2.59E-01 | 0.15  | 4.46E-01 |
| LAIR2         | 0.12  | 5.52E-01 | 0.15  | 4.46E-01 |
| P4HB          | 0.37  | 5.33E-02 | 0.15  | 4.46E-01 |
| PHC3          | 0.02  | 9.32E-01 | -0.15 | 4.46E-01 |
| PSTK          | -0.23 | 2.46E-01 | -0.15 | 4.46E-01 |
| RNU6-435P     | -0.23 | 2.35E-01 | -0.15 | 4.46E-01 |
| RP1-40G4P.1   | 0.25  | 2.08E-01 | 0.15  | 4.46E-01 |
| RP11-1000B6.8 | -0.02 | 9.00E-01 | 0.15  | 4.46E-01 |
| RP11-175K6.2  | -0.01 | 9.49E-01 | 0.15  | 4.46E-01 |
| RP11-21C4.1   | 0.08  | 6.98E-01 | 0.15  | 4.46E-01 |
| RP11-66N11.8  | -0.32 | 1.01E-01 | 0.15  | 4.46E-01 |
| RP11-6L6.2    | -0.35 | 6.73E-02 | -0.15 | 4.46E-01 |
| RSRC1         | 0.18  | 3.68E-01 | -0.15 | 4.46E-01 |
| WIPF3         | -0.01 | 9.63E-01 | 0.15  | 4.46E-01 |
| XLOC_002997   | -0.09 | 6.40E-01 | -0.15 | 4.46E-01 |

|                |       |          |       |          |
|----------------|-------|----------|-------|----------|
| AC000123.4     | -0.10 | 6.03E-01 | -0.15 | 4.47E-01 |
| AC008592.4     | -0.03 | 8.88E-01 | 0.15  | 4.47E-01 |
| AC078899.1     | -0.24 | 2.11E-01 | -0.15 | 4.47E-01 |
| ACO2           | 0.13  | 5.07E-01 | 0.15  | 4.47E-01 |
| ADD3           | 0.01  | 9.74E-01 | -0.15 | 4.47E-01 |
| BRWD1-IT2      | 0.26  | 1.77E-01 | 0.15  | 4.47E-01 |
| CCL4           | 0.29  | 1.30E-01 | 0.15  | 4.47E-01 |
| CTD-2192J16.11 | -0.20 | 3.07E-01 | 0.15  | 4.47E-01 |
| CXCL8          | 0.03  | 8.95E-01 | 0.15  | 4.47E-01 |
| CYP3A4         | 0.02  | 9.35E-01 | -0.15 | 4.47E-01 |
| DDX12P         | -0.25 | 1.92E-01 | -0.15 | 4.47E-01 |
| FIP1L1         | 0.20  | 3.06E-01 | 0.15  | 4.47E-01 |
| G10661         | 0.31  | 1.14E-01 | 0.15  | 4.47E-01 |
| G26815         | -0.05 | 7.95E-01 | 0.15  | 4.47E-01 |
| GLMP           | -0.03 | 8.79E-01 | 0.15  | 4.47E-01 |
| GLYATL2        | 0.09  | 6.38E-01 | 0.15  | 4.47E-01 |
| HERC2          | -0.12 | 5.54E-01 | 0.15  | 4.47E-01 |
| KB-1460A1.2    | -0.27 | 1.64E-01 | -0.15 | 4.47E-01 |
| LA16c-321D4.2  | 0.16  | 4.16E-01 | 0.15  | 4.47E-01 |
| LLOXNC01-7P3.1 | -0.06 | 7.64E-01 | -0.15 | 4.47E-01 |
| PDP2           | 0.21  | 2.85E-01 | 0.15  | 4.47E-01 |
| PLA2G12A       | -0.10 | 6.08E-01 | 0.15  | 4.47E-01 |
| PNKD           | -0.02 | 9.01E-01 | 0.15  | 4.47E-01 |
| RP1-178F10.1   | -0.34 | 7.92E-02 | 0.15  | 4.47E-01 |
| RP11-184J23.2  | 0.26  | 1.82E-01 | -0.15 | 4.47E-01 |
| RP11-220C2.1   | 0.05  | 8.16E-01 | -0.15 | 4.47E-01 |
| RP11-44F14.9   | -0.01 | 9.56E-01 | 0.15  | 4.47E-01 |
| RP11-56H7.2    | -0.30 | 1.21E-01 | -0.15 | 4.47E-01 |
| STK16          | 0.23  | 2.30E-01 | 0.15  | 4.47E-01 |
| TAGAP          | 0.02  | 9.37E-01 | -0.15 | 4.47E-01 |
| TCAP           | -0.12 | 5.34E-01 | -0.15 | 4.47E-01 |
| UBE2Q2         | 0.17  | 3.99E-01 | 0.15  | 4.47E-01 |
| ZSCAN21        | -0.04 | 8.22E-01 | 0.15  | 4.47E-01 |
| A1BG-AS1       | 0.06  | 7.61E-01 | 0.15  | 4.48E-01 |
| ABCA4          | -0.20 | 3.20E-01 | -0.15 | 4.48E-01 |
| AC002519.8     | -0.31 | 1.10E-01 | -0.15 | 4.48E-01 |
| AL023807.1     | -0.14 | 4.79E-01 | 0.15  | 4.48E-01 |
| AL356741.1     | 0.06  | 7.57E-01 | 0.15  | 4.48E-01 |
| B4GAT1         | 0.17  | 3.92E-01 | -0.15 | 4.48E-01 |
| CD80           | -0.02 | 9.24E-01 | 0.15  | 4.48E-01 |
| CDC42P6        | 0.40  | 3.29E-02 | 0.15  | 4.48E-01 |
| CTA-276F8.2    | -0.05 | 8.10E-01 | -0.15 | 4.48E-01 |
| FKBP9          | -0.05 | 8.13E-01 | 0.15  | 4.48E-01 |
| FNDC5          | 0.18  | 3.72E-01 | -0.15 | 4.48E-01 |
| G5901          | 0.00  | 9.94E-01 | 0.15  | 4.48E-01 |
| HIST3H2BB      | -0.17 | 3.90E-01 | -0.15 | 4.48E-01 |
| KCTD17         | -0.02 | 9.22E-01 | -0.15 | 4.48E-01 |

|                |       |          |       |          |
|----------------|-------|----------|-------|----------|
| LILRB1         | 0.13  | 5.19E-01 | 0.15  | 4.48E-01 |
| MARVELD3       | 0.23  | 2.37E-01 | 0.15  | 4.48E-01 |
| MBOAT4         | -0.29 | 1.35E-01 | 0.15  | 4.48E-01 |
| MCCC2          | 0.14  | 4.79E-01 | 0.15  | 4.48E-01 |
| MIR194-1       | -0.25 | 2.06E-01 | -0.15 | 4.48E-01 |
| MIR3671        | -0.27 | 1.65E-01 | -0.15 | 4.48E-01 |
| NAP1L4         | 0.07  | 7.33E-01 | 0.15  | 4.48E-01 |
| P2RY14         | -0.04 | 8.54E-01 | -0.15 | 4.48E-01 |
| PPIEL          | 0.05  | 7.88E-01 | -0.15 | 4.48E-01 |
| PRKCA-AS1      | 0.03  | 8.90E-01 | -0.15 | 4.48E-01 |
| PRR16          | -0.15 | 4.56E-01 | 0.15  | 4.48E-01 |
| PSMA6          | 0.14  | 4.80E-01 | 0.15  | 4.48E-01 |
| RP11-589P10.5  | -0.17 | 3.81E-01 | 0.15  | 4.48E-01 |
| RP11-632F7.3   | 0.39  | 3.86E-02 | -0.15 | 4.48E-01 |
| SGTB           | 0.02  | 9.09E-01 | -0.15 | 4.48E-01 |
| TMBIM4         | 0.17  | 3.74E-01 | -0.15 | 4.48E-01 |
| XLOC_007993    | -0.36 | 5.64E-02 | -0.15 | 4.48E-01 |
| ZEB1-AS1       | 0.10  | 6.10E-01 | -0.15 | 4.48E-01 |
| ZGPAT          | -0.13 | 5.01E-01 | 0.15  | 4.48E-01 |
| ZNF229         | 0.09  | 6.36E-01 | -0.15 | 4.48E-01 |
| APTX           | -0.13 | 5.09E-01 | 0.15  | 4.49E-01 |
| CCBL2          | 0.04  | 8.42E-01 | 0.15  | 4.49E-01 |
| CLIC6          | -0.01 | 9.66E-01 | 0.15  | 4.49E-01 |
| GALNT2         | -0.10 | 6.31E-01 | 0.15  | 4.49E-01 |
| GDI1           | -0.02 | 9.16E-01 | 0.15  | 4.49E-01 |
| MICALL2        | -0.07 | 7.22E-01 | 0.15  | 4.49E-01 |
| NUDT3          | 0.27  | 1.70E-01 | 0.15  | 4.49E-01 |
| RP11-396C23.2  | -0.12 | 5.43E-01 | 0.15  | 4.49E-01 |
| RP11-529G21.2  | 0.47  | 1.10E-02 | 0.15  | 4.49E-01 |
| SGMS1          | 0.08  | 6.79E-01 | 0.15  | 4.49E-01 |
| TMEM176A       | 0.05  | 7.82E-01 | 0.15  | 4.49E-01 |
| TRIM27         | 0.39  | 4.20E-02 | 0.15  | 4.49E-01 |
| ABCA8          | -0.13 | 5.01E-01 | -0.15 | 4.49E-01 |
| AIMP1P1        | -0.17 | 3.79E-01 | -0.15 | 4.49E-01 |
| CACYBPP1       | 0.13  | 4.99E-01 | -0.15 | 4.49E-01 |
| GOT2P3         | 0.07  | 7.37E-01 | -0.15 | 4.49E-01 |
| ING2           | -0.29 | 1.39E-01 | -0.15 | 4.49E-01 |
| KCNH5          | 0.05  | 8.05E-01 | -0.15 | 4.49E-01 |
| MED6           | 0.09  | 6.51E-01 | -0.15 | 4.49E-01 |
| OR5BK1P        | -0.37 | 5.29E-02 | -0.15 | 4.49E-01 |
| RNY4P4         | 0.29  | 1.28E-01 | -0.15 | 4.49E-01 |
| RP11-1394O16.1 | -0.07 | 7.29E-01 | -0.15 | 4.49E-01 |
| RP11-543N12.1  | -0.09 | 6.47E-01 | -0.15 | 4.49E-01 |
| RP11-757C15.4  | -0.18 | 3.63E-01 | -0.15 | 4.49E-01 |
| RP5-837J1.6    | 0.04  | 8.32E-01 | -0.15 | 4.49E-01 |
| RP5-901A4.1    | -0.09 | 6.53E-01 | -0.15 | 4.49E-01 |
| SCGB1D2        | -0.17 | 3.76E-01 | -0.15 | 4.49E-01 |

|                  |       |          |       |          |
|------------------|-------|----------|-------|----------|
| TBX10            | 0.39  | 3.97E-02 | -0.15 | 4.49E-01 |
| ASB3             | -0.40 | 3.69E-02 | 0.15  | 4.50E-01 |
| CTC-510F12.4     | 0.26  | 1.87E-01 | 0.15  | 4.50E-01 |
| EIF4A1P10        | 0.01  | 9.72E-01 | 0.15  | 4.50E-01 |
| EMX2OS           | -0.34 | 7.61E-02 | -0.15 | 4.50E-01 |
| G18287           | -0.19 | 3.35E-01 | -0.15 | 4.50E-01 |
| ITGB3BP          | -0.15 | 4.32E-01 | -0.15 | 4.50E-01 |
| .L22NC03-75H12.2 | 0.04  | 8.55E-01 | -0.15 | 4.50E-01 |
| LRRC69           | 0.09  | 6.61E-01 | -0.15 | 4.50E-01 |
| PTPRO            | 0.39  | 3.80E-02 | 0.15  | 4.50E-01 |
| PTTG1IP          | 0.10  | 6.10E-01 | 0.15  | 4.50E-01 |
| QRFP             | 0.29  | 1.33E-01 | 0.15  | 4.50E-01 |
| RP1-128O3.6      | 0.17  | 3.85E-01 | -0.15 | 4.50E-01 |
| RP11-15F12.6     | -0.16 | 4.26E-01 | 0.15  | 4.50E-01 |
| RPS4XP5          | -0.02 | 9.34E-01 | -0.15 | 4.50E-01 |
| SBNO1            | 0.07  | 7.05E-01 | -0.15 | 4.50E-01 |
| TGFB2-AS1        | -0.22 | 2.62E-01 | -0.15 | 4.50E-01 |
| TRAPPC10         | -0.05 | 7.96E-01 | 0.15  | 4.50E-01 |
| USP21            | -0.17 | 3.90E-01 | -0.15 | 4.50E-01 |
| ZNF844           | 0.07  | 7.33E-01 | -0.15 | 4.50E-01 |
| AE000661.37      | 0.32  | 9.15E-02 | -0.15 | 4.51E-01 |
| AIMP1            | 0.06  | 7.52E-01 | -0.15 | 4.51E-01 |
| CALCOCO2         | -0.02 | 9.03E-01 | 0.15  | 4.51E-01 |
| COL28A1          | -0.38 | 4.47E-02 | -0.15 | 4.51E-01 |
| CTC-344H19.4     | 0.00  | 9.96E-01 | -0.15 | 4.51E-01 |
| GS1-124K5.11     | -0.04 | 8.26E-01 | -0.15 | 4.51E-01 |
| HMG3-AS1         | -0.25 | 2.04E-01 | -0.15 | 4.51E-01 |
| IFT57            | 0.15  | 4.60E-01 | -0.15 | 4.51E-01 |
| LINC00235        | 0.12  | 5.32E-01 | -0.15 | 4.51E-01 |
| LINC00996        | -0.01 | 9.65E-01 | -0.15 | 4.51E-01 |
| MIR4312          | 0.29  | 1.30E-01 | -0.15 | 4.51E-01 |
| MNAT1            | 0.17  | 4.01E-01 | -0.15 | 4.51E-01 |
| PHC1             | 0.11  | 5.78E-01 | 0.15  | 4.51E-01 |
| PPIF             | 0.34  | 7.66E-02 | 0.15  | 4.51E-01 |
| RP1-267L14.3     | -0.01 | 9.42E-01 | -0.15 | 4.51E-01 |
| RP11-126F18.2    | 0.01  | 9.43E-01 | -0.15 | 4.51E-01 |
| RP11-326G21.1    | -0.29 | 1.34E-01 | -0.15 | 4.51E-01 |
| RP11-330H6.6     | 0.18  | 3.59E-01 | 0.15  | 4.51E-01 |
| RP11-347I19.8    | -0.18 | 3.68E-01 | 0.15  | 4.51E-01 |
| RP11-654A16.3    | 0.01  | 9.65E-01 | 0.15  | 4.51E-01 |
| RP11-73M18.8     | -0.03 | 8.65E-01 | 0.15  | 4.51E-01 |
| SYNPO2L          | 0.08  | 6.76E-01 | -0.15 | 4.51E-01 |
| TMPOP2           | 0.33  | 8.78E-02 | -0.15 | 4.51E-01 |
| AATBC            | -0.10 | 6.00E-01 | -0.15 | 4.52E-01 |
| AC017002.2       | -0.08 | 6.71E-01 | 0.15  | 4.52E-01 |
| ANK3             | 0.18  | 3.65E-01 | -0.15 | 4.52E-01 |
| APOB             | -0.36 | 6.07E-02 | -0.15 | 4.52E-01 |

|               |       |          |       |          |
|---------------|-------|----------|-------|----------|
| ASNA1         | 0.05  | 7.95E-01 | 0.15  | 4.52E-01 |
| BANF1P3       | -0.16 | 4.02E-01 | 0.15  | 4.52E-01 |
| BNIP3P16      | -0.13 | 5.00E-01 | -0.15 | 4.52E-01 |
| DPP10         | 0.02  | 9.36E-01 | -0.15 | 4.52E-01 |
| G30851        | 0.12  | 5.29E-01 | 0.15  | 4.52E-01 |
| KCND3-AS1     | 0.15  | 4.60E-01 | 0.15  | 4.52E-01 |
| KIAA1524      | 0.07  | 7.41E-01 | -0.15 | 4.52E-01 |
| LINC01588     | 0.02  | 9.22E-01 | -0.15 | 4.52E-01 |
| METRN         | -0.28 | 1.49E-01 | -0.15 | 4.52E-01 |
| RNU2-28P      | 0.02  | 9.23E-01 | -0.15 | 4.52E-01 |
| RP11-329J18.3 | -0.01 | 9.44E-01 | 0.15  | 4.52E-01 |
| RP11-395A13.2 | 0.05  | 7.99E-01 | 0.15  | 4.52E-01 |
| RP11-448G4.4  | 0.20  | 2.99E-01 | -0.15 | 4.52E-01 |
| RP11-44B19.1  | -0.22 | 2.53E-01 | -0.15 | 4.52E-01 |
| RP11-56B16.2  | -0.14 | 4.72E-01 | -0.15 | 4.52E-01 |
| RP3-337H4.6   | 0.32  | 9.65E-02 | -0.15 | 4.52E-01 |
| RP3-510O8.4   | 0.12  | 5.32E-01 | 0.15  | 4.52E-01 |
| RP4-681N20.5  | 0.01  | 9.49E-01 | -0.15 | 4.52E-01 |
| ZSCAN1        | 0.04  | 8.59E-01 | -0.15 | 4.52E-01 |
| AC016734.2    | 0.64  | 2.18E-04 | -0.15 | 4.53E-01 |
| AC078852.1    | 0.19  | 3.28E-01 | -0.15 | 4.53E-01 |
| AIF1          | 0.02  | 9.08E-01 | 0.15  | 4.53E-01 |
| AL591893.1    | -0.10 | 6.31E-01 | 0.15  | 4.53E-01 |
| AP001172.2    | -0.26 | 1.87E-01 | 0.15  | 4.53E-01 |
| C21orf62-AS1  | -0.08 | 6.80E-01 | -0.15 | 4.53E-01 |
| C9orf142      | 0.00  | 9.88E-01 | 0.15  | 4.53E-01 |
| CCND2         | 0.08  | 6.86E-01 | 0.15  | 4.53E-01 |
| CTD-2554C21.2 | 0.07  | 7.09E-01 | -0.15 | 4.53E-01 |
| DR1           | 0.11  | 5.63E-01 | -0.15 | 4.53E-01 |
| FAM132A       | -0.07 | 7.23E-01 | -0.15 | 4.53E-01 |
| FBXL18        | 0.29  | 1.33E-01 | 0.15  | 4.53E-01 |
| FTLP6         | -0.12 | 5.49E-01 | 0.15  | 4.53E-01 |
| G26248        | -0.26 | 1.89E-01 | -0.15 | 4.53E-01 |
| HIBADH        | 0.05  | 8.14E-01 | -0.15 | 4.53E-01 |
| KB-208E9.1    | 0.14  | 4.90E-01 | 0.15  | 4.53E-01 |
| NUAK1         | 0.16  | 4.12E-01 | 0.15  | 4.53E-01 |
| OSMR-AS1      | 0.00  | 9.88E-01 | 0.15  | 4.53E-01 |
| PLCE1         | -0.26 | 1.82E-01 | -0.15 | 4.53E-01 |
| RNU6-514P     | -0.04 | 8.58E-01 | 0.15  | 4.53E-01 |
| RP11-216B9.8  | 0.10  | 6.27E-01 | -0.15 | 4.53E-01 |
| RP11-432I13.6 | 0.03  | 8.63E-01 | 0.15  | 4.53E-01 |
| RP11-616M22.7 | -0.28 | 1.44E-01 | -0.15 | 4.53E-01 |
| RP3-388M5.9   | -0.21 | 2.74E-01 | -0.15 | 4.53E-01 |
| RP4-535B20.1  | 0.02  | 9.09E-01 | 0.15  | 4.53E-01 |
| TKFC          | 0.18  | 3.67E-01 | 0.15  | 4.53E-01 |
| AC073850.6    | 0.10  | 6.01E-01 | 0.15  | 4.53E-01 |
| AC083862.6    | -0.12 | 5.51E-01 | 0.15  | 4.53E-01 |

|                |       |          |       |          |
|----------------|-------|----------|-------|----------|
| ACER2          | -0.21 | 2.73E-01 | -0.15 | 4.53E-01 |
| BEST1          | -0.07 | 7.11E-01 | -0.15 | 4.53E-01 |
| BMS1P20        | 0.46  | 1.44E-02 | -0.15 | 4.53E-01 |
| C9orf43        | 0.25  | 1.95E-01 | 0.15  | 4.53E-01 |
| CTC-360J11.4   | 0.08  | 7.01E-01 | -0.15 | 4.53E-01 |
| ICE1           | 0.04  | 8.27E-01 | -0.15 | 4.53E-01 |
| IL17F          | 0.00  | 9.80E-01 | -0.15 | 4.53E-01 |
| KMT2C          | -0.16 | 4.27E-01 | -0.15 | 4.53E-01 |
| LYG1           | 0.19  | 3.39E-01 | -0.15 | 4.53E-01 |
| MIR4706        | 0.12  | 5.35E-01 | -0.15 | 4.53E-01 |
| MOB4           | 0.20  | 3.04E-01 | -0.15 | 4.53E-01 |
| MT-ND3         | 0.23  | 2.31E-01 | 0.15  | 4.53E-01 |
| NEK1           | -0.08 | 6.77E-01 | -0.15 | 4.53E-01 |
| PKIG           | -0.03 | 8.88E-01 | 0.15  | 4.53E-01 |
| PLA2G3         | 0.25  | 2.09E-01 | 0.15  | 4.53E-01 |
| PSMA1          | 0.05  | 8.12E-01 | -0.15 | 4.53E-01 |
| RGS16          | -0.11 | 5.84E-01 | 0.15  | 4.53E-01 |
| RNA5SP123      | 0.01  | 9.63E-01 | -0.15 | 4.53E-01 |
| RP11-1182P23.5 | -0.15 | 4.49E-01 | -0.15 | 4.53E-01 |
| RP11-20I20.4   | -0.47 | 1.25E-02 | -0.15 | 4.53E-01 |
| RP11-254B13.4  | -0.26 | 1.76E-01 | -0.15 | 4.53E-01 |
| RP11-30K9.6    | 0.32  | 1.01E-01 | 0.15  | 4.53E-01 |
| RP11-394O4.5   | -0.14 | 4.86E-01 | 0.15  | 4.53E-01 |
| RP11-474L23.3  | -0.15 | 4.35E-01 | -0.15 | 4.53E-01 |
| RP11-484D2.5   | -0.06 | 7.63E-01 | -0.15 | 4.53E-01 |
| RPAP2          | 0.46  | 1.32E-02 | 0.15  | 4.53E-01 |
| SCARF1         | 0.08  | 6.71E-01 | 0.15  | 4.53E-01 |
| SNORD82        | -0.14 | 4.90E-01 | -0.15 | 4.53E-01 |
| ACVRL1         | -0.05 | 7.89E-01 | 0.15  | 4.54E-01 |
| C5orf30        | 0.13  | 5.15E-01 | -0.15 | 4.54E-01 |
| CALML3-AS1     | -0.19 | 3.34E-01 | -0.15 | 4.54E-01 |
| CTC-244M17.1   | -0.09 | 6.36E-01 | -0.15 | 4.54E-01 |
| KATNA1         | 0.10  | 6.09E-01 | 0.15  | 4.54E-01 |
| LINC01515      | -0.32 | 1.02E-01 | -0.15 | 4.54E-01 |
| MT-CO2         | 0.21  | 2.87E-01 | 0.15  | 4.54E-01 |
| MTNR1B         | 0.17  | 3.91E-01 | 0.15  | 4.54E-01 |
| NAP1L6         | 0.05  | 8.01E-01 | -0.15 | 4.54E-01 |
| NBPF1          | 0.24  | 2.13E-01 | 0.15  | 4.54E-01 |
| RNU4ATAC16P    | 0.11  | 5.69E-01 | -0.15 | 4.54E-01 |
| RP11-263K4.1   | 0.14  | 4.67E-01 | -0.15 | 4.54E-01 |
| RP11-353N14.5  | -0.06 | 7.65E-01 | -0.15 | 4.54E-01 |
| RP11-378G13.2  | 0.09  | 6.63E-01 | 0.15  | 4.54E-01 |
| RP11-613M10.9  | 0.18  | 3.60E-01 | 0.15  | 4.54E-01 |
| RP11-65E22.2   | -0.16 | 4.20E-01 | -0.15 | 4.54E-01 |
| RP11-789C17.3  | -0.31 | 1.14E-01 | -0.15 | 4.54E-01 |
| RP11-93B14.6   | -0.10 | 6.05E-01 | 0.15  | 4.54E-01 |
| RP3-325F22.5   | 0.31  | 1.05E-01 | 0.15  | 4.54E-01 |



|                |       |          |       |          |
|----------------|-------|----------|-------|----------|
| RPS3AP34       | -0.39 | 4.04E-02 | -0.15 | 4.54E-01 |
| SEC23IP        | 0.13  | 5.21E-01 | 0.15  | 4.54E-01 |
| SFT2D2         | 0.18  | 3.63E-01 | -0.15 | 4.54E-01 |
| SGK2           | 0.05  | 8.07E-01 | -0.15 | 4.54E-01 |
| SNORD116-13    | 0.05  | 7.89E-01 | 0.15  | 4.54E-01 |
| TIAF1          | -0.15 | 4.47E-01 | -0.15 | 4.54E-01 |
| TP53TG5        | -0.01 | 9.61E-01 | 0.15  | 4.54E-01 |
| XLOC_009782    | -0.12 | 5.41E-01 | -0.15 | 4.54E-01 |
| XLOC_010364    | 0.02  | 9.33E-01 | 0.15  | 4.54E-01 |
| AC073635.5     | -0.04 | 8.31E-01 | -0.15 | 4.55E-01 |
| C1QTNF3        | -0.34 | 7.59E-02 | 0.15  | 4.55E-01 |
| CD69           | 0.10  | 6.06E-01 | 0.15  | 4.55E-01 |
| DUTP1          | -0.28 | 1.43E-01 | -0.15 | 4.55E-01 |
| GDF11          | -0.18 | 3.69E-01 | -0.15 | 4.55E-01 |
| HCFC1-AS1      | 0.01  | 9.51E-01 | -0.15 | 4.55E-01 |
| MAP1LC3B       | 0.00  | 9.97E-01 | 0.15  | 4.55E-01 |
| MBD5           | 0.04  | 8.21E-01 | -0.15 | 4.55E-01 |
| NCKAP1         | 0.04  | 8.56E-01 | -0.15 | 4.55E-01 |
| ORC2           | 0.23  | 2.43E-01 | 0.15  | 4.55E-01 |
| PRELID1P1      | 0.11  | 5.79E-01 | -0.15 | 4.55E-01 |
| RN7SL473P      | -0.18 | 3.47E-01 | -0.15 | 4.55E-01 |
| RP11-106M7.1   | 0.14  | 4.66E-01 | 0.15  | 4.55E-01 |
| RP11-129K12.1  | -0.20 | 3.17E-01 | 0.15  | 4.55E-01 |
| RP11-196G11.3  | -0.03 | 8.68E-01 | 0.15  | 4.55E-01 |
| RP11-463I20.2  | -0.20 | 3.02E-01 | -0.15 | 4.55E-01 |
| RP11-464F9.20  | 0.09  | 6.43E-01 | 0.15  | 4.55E-01 |
| RP11-509J21.2  | 0.26  | 1.90E-01 | -0.15 | 4.55E-01 |
| RPL21P65       | 0.03  | 8.88E-01 | 0.15  | 4.55E-01 |
| STEAP2         | -0.02 | 9.09E-01 | -0.15 | 4.55E-01 |
| TMEM255A       | -0.25 | 1.93E-01 | -0.15 | 4.55E-01 |
| TRIO           | -0.01 | 9.47E-01 | -0.15 | 4.55E-01 |
| ULK4           | -0.20 | 3.20E-01 | -0.15 | 4.55E-01 |
| ZNF536         | -0.01 | 9.40E-01 | -0.15 | 4.55E-01 |
| ZNF813         | -0.15 | 4.39E-01 | -0.15 | 4.55E-01 |
| ZNF846         | 0.23  | 2.33E-01 | 0.15  | 4.55E-01 |
| AC118278.1     | -0.20 | 2.97E-01 | -0.15 | 4.56E-01 |
| AK4P1          | -0.21 | 2.76E-01 | 0.15  | 4.56E-01 |
| ATRN           | 0.03  | 8.71E-01 | 0.15  | 4.56E-01 |
| CASP1          | 0.16  | 4.15E-01 | 0.15  | 4.56E-01 |
| CTD-2616J11.10 | 0.42  | 2.73E-02 | -0.15 | 4.56E-01 |
| CTD-2636A23.2  | -0.19 | 3.22E-01 | -0.15 | 4.56E-01 |
| HNRNPMP1       | -0.15 | 4.38E-01 | -0.15 | 4.56E-01 |
| HOXD13         | 0.00  | 1.00E+00 | -0.15 | 4.56E-01 |
| HSP90AB4P      | 0.13  | 5.17E-01 | -0.15 | 4.56E-01 |
| LINC01100      | 0.01  | 9.59E-01 | -0.15 | 4.56E-01 |
| NANS           | 0.27  | 1.65E-01 | 0.15  | 4.56E-01 |
| NPC2           | 0.18  | 3.69E-01 | 0.15  | 4.56E-01 |

|                       |       |          |       |          |
|-----------------------|-------|----------|-------|----------|
| <b>NRON</b>           | 0.09  | 6.34E-01 | -0.15 | 4.56E-01 |
| <b>NUDT15</b>         | 0.21  | 2.76E-01 | -0.15 | 4.56E-01 |
| <b>OSR1</b>           | -0.26 | 1.82E-01 | -0.15 | 4.56E-01 |
| <b>PPHLN1</b>         | 0.07  | 7.12E-01 | -0.15 | 4.56E-01 |
| <b>RND3</b>           | -0.04 | 8.21E-01 | 0.15  | 4.56E-01 |
| <b>RNU1-11P</b>       | -0.03 | 8.94E-01 | 0.15  | 4.56E-01 |
| <b>RP11-108K14.12</b> | 0.20  | 3.01E-01 | 0.15  | 4.56E-01 |
| <b>RP11-117L5.1</b>   | 0.21  | 2.82E-01 | 0.15  | 4.56E-01 |
| <b>RP11-158M2.3</b>   | 0.32  | 1.01E-01 | -0.15 | 4.56E-01 |
| <b>RP11-384F7.2</b>   | 0.13  | 4.97E-01 | 0.15  | 4.56E-01 |
| <b>RP11-84A14.4</b>   | 0.31  | 1.14E-01 | -0.15 | 4.56E-01 |
| <b>RPA4</b>           | -0.09 | 6.50E-01 | 0.15  | 4.56E-01 |
| <b>SELL</b>           | 0.08  | 6.83E-01 | 0.15  | 4.56E-01 |
| <b>SLC27A4</b>        | 0.29  | 1.32E-01 | 0.15  | 4.56E-01 |
| <b>TMEM160</b>        | -0.05 | 8.13E-01 | 0.15  | 4.56E-01 |
| <b>UGCG</b>           | 0.28  | 1.50E-01 | 0.15  | 4.56E-01 |
| <b>VSIG2</b>          | 0.14  | 4.69E-01 | -0.15 | 4.56E-01 |
| <b>ZC3H11A</b>        | -0.06 | 7.81E-01 | -0.15 | 4.56E-01 |
| <b>AC009542.2</b>     | -0.31 | 1.11E-01 | -0.15 | 4.57E-01 |
| <b>AC011385.1</b>     | 0.26  | 1.85E-01 | 0.15  | 4.57E-01 |
| <b>AL592284.1</b>     | 0.48  | 9.94E-03 | 0.15  | 4.57E-01 |
| <b>BTBD3</b>          | 0.33  | 8.29E-02 | 0.15  | 4.57E-01 |
| <b>CCDC150P1</b>      | 0.03  | 8.93E-01 | -0.15 | 4.57E-01 |
| <b>CCR3</b>           | 0.01  | 9.54E-01 | -0.15 | 4.57E-01 |
| <b>CTD-2545H1.2</b>   | 0.09  | 6.62E-01 | -0.15 | 4.57E-01 |
| <b>CTD-2653D5.1</b>   | 0.10  | 6.15E-01 | 0.15  | 4.57E-01 |
| <b>DDI2</b>           | 0.21  | 2.93E-01 | 0.15  | 4.57E-01 |
| <b>G15373</b>         | -0.12 | 5.54E-01 | -0.15 | 4.57E-01 |
| <b>G31554</b>         | 0.35  | 6.73E-02 | 0.15  | 4.57E-01 |
| <b>GBE1</b>           | 0.12  | 5.28E-01 | -0.15 | 4.57E-01 |
| <b>MIR219-1</b>       | -0.14 | 4.71E-01 | -0.15 | 4.57E-01 |
| <b>NASP</b>           | -0.04 | 8.52E-01 | -0.15 | 4.57E-01 |
| <b>OR6L2P</b>         | -0.14 | 4.81E-01 | -0.15 | 4.57E-01 |
| <b>OTOP1</b>          | -0.14 | 4.84E-01 | -0.15 | 4.57E-01 |
| <b>PQLC1</b>          | -0.06 | 7.71E-01 | 0.15  | 4.57E-01 |
| <b>RFC3</b>           | 0.24  | 2.16E-01 | -0.15 | 4.57E-01 |
| <b>RP11-10C24.1</b>   | 0.15  | 4.60E-01 | 0.15  | 4.57E-01 |
| <b>RP11-1275H24.3</b> | 0.27  | 1.64E-01 | -0.15 | 4.57E-01 |
| <b>RP11-142L16.2</b>  | 0.01  | 9.43E-01 | -0.15 | 4.57E-01 |
| <b>RP11-21A7A.4</b>   | -0.48 | 1.00E-02 | 0.15  | 4.57E-01 |
| <b>RP11-337A23.5</b>  | 0.26  | 1.78E-01 | -0.15 | 4.57E-01 |
| <b>RP11-365O16.3</b>  | -0.10 | 6.03E-01 | -0.15 | 4.57E-01 |
| <b>RP11-405M12.4</b>  | 0.19  | 3.26E-01 | 0.15  | 4.57E-01 |
| <b>RP11-972P1.10</b>  | 0.03  | 8.74E-01 | -0.15 | 4.57E-01 |
| <b>SARS2</b>          | -0.08 | 6.85E-01 | 0.15  | 4.57E-01 |
| <b>SERPINA10</b>      | -0.35 | 6.41E-02 | -0.15 | 4.57E-01 |
| <b>SNAPIN</b>         | -0.05 | 7.93E-01 | 0.15  | 4.57E-01 |

|               |       |          |       |          |
|---------------|-------|----------|-------|----------|
| UBN1          | 0.09  | 6.50E-01 | 0.15  | 4.57E-01 |
| USP30         | 0.02  | 9.01E-01 | -0.15 | 4.57E-01 |
| ZC3H12C       | 0.12  | 5.43E-01 | 0.15  | 4.57E-01 |
| AC005754.8    | 0.34  | 7.59E-02 | -0.15 | 4.58E-01 |
| AL096677.1    | -0.08 | 6.70E-01 | -0.15 | 4.58E-01 |
| C8orf89       | -0.05 | 8.09E-01 | -0.15 | 4.58E-01 |
| COA6          | 0.01  | 9.78E-01 | -0.15 | 4.58E-01 |
| DCTN4         | 0.19  | 3.32E-01 | 0.15  | 4.58E-01 |
| ESRRA         | 0.26  | 1.88E-01 | 0.15  | 4.58E-01 |
| FOLH1B        | 0.02  | 9.02E-01 | 0.15  | 4.58E-01 |
| G4024         | 0.31  | 1.11E-01 | 0.15  | 4.58E-01 |
| GRIA3         | -0.21 | 2.81E-01 | -0.15 | 4.58E-01 |
| GTF3C1        | -0.18 | 3.53E-01 | -0.15 | 4.58E-01 |
| IL17RC        | -0.01 | 9.42E-01 | 0.15  | 4.58E-01 |
| KIF26A        | -0.23 | 2.34E-01 | -0.15 | 4.58E-01 |
| POU5F1P4      | -0.19 | 3.30E-01 | -0.15 | 4.58E-01 |
| PYGL          | 0.18  | 3.53E-01 | 0.15  | 4.58E-01 |
| RALB          | 0.28  | 1.45E-01 | 0.15  | 4.58E-01 |
| RN7SKP179     | 0.06  | 7.72E-01 | -0.15 | 4.58E-01 |
| RN7SL838P     | -0.15 | 4.53E-01 | -0.15 | 4.58E-01 |
| RNU6-1045P    | 0.03  | 8.79E-01 | -0.15 | 4.58E-01 |
| RP11-141C7.4  | 0.11  | 5.66E-01 | 0.15  | 4.58E-01 |
| RP11-167P11.2 | 0.08  | 6.94E-01 | 0.15  | 4.58E-01 |
| RP11-21L23.3  | 0.23  | 2.36E-01 | 0.15  | 4.58E-01 |
| RP11-292F22.5 | -0.04 | 8.51E-01 | -0.15 | 4.58E-01 |
| RP11-400L8.2  | -0.09 | 6.55E-01 | -0.15 | 4.58E-01 |
| RP11-495K9.5  | 0.19  | 3.39E-01 | -0.15 | 4.58E-01 |
| RP11-569A2.2  | -0.17 | 3.80E-01 | 0.15  | 4.58E-01 |
| RP11-64D24.4  | -0.05 | 7.94E-01 | -0.15 | 4.58E-01 |
| RP11-770G2.2  | -0.18 | 3.69E-01 | -0.15 | 4.58E-01 |
| RP11-845C23.2 | -0.31 | 1.03E-01 | -0.15 | 4.58E-01 |
| RP11-89N17.4  | -0.46 | 1.40E-02 | 0.15  | 4.58E-01 |
| SNCA-AS1      | -0.15 | 4.49E-01 | -0.15 | 4.58E-01 |
| SUCLG2-AS1    | -0.02 | 9.24E-01 | -0.15 | 4.58E-01 |
| SURF1         | -0.15 | 4.53E-01 | 0.15  | 4.58E-01 |
| UACA          | -0.31 | 1.08E-01 | 0.15  | 4.58E-01 |
| XRCC1         | -0.30 | 1.27E-01 | 0.15  | 4.58E-01 |
| ZFAND2B       | 0.03  | 8.82E-01 | 0.15  | 4.58E-01 |
| ZNF70         | 0.18  | 3.47E-01 | 0.15  | 4.58E-01 |
| AC010999.1    | 0.00  | 9.83E-01 | -0.15 | 4.59E-01 |
| AMZ2          | 0.08  | 6.78E-01 | 0.15  | 4.59E-01 |
| ATG2B         | -0.10 | 6.22E-01 | -0.15 | 4.59E-01 |
| B2M           | 0.11  | 5.80E-01 | 0.15  | 4.59E-01 |
| CTD-2201E9.4  | -0.15 | 4.34E-01 | 0.15  | 4.59E-01 |
| EXD3          | -0.01 | 9.65E-01 | 0.15  | 4.59E-01 |
| FAM218A       | -0.34 | 7.61E-02 | -0.15 | 4.59E-01 |
| GPR87         | 0.40  | 3.58E-02 | 0.15  | 4.59E-01 |

|                 |       |          |       |          |
|-----------------|-------|----------|-------|----------|
| H2AFV           | 0.15  | 4.52E-01 | -0.15 | 4.59E-01 |
| KRT222          | -0.40 | 3.29E-02 | -0.15 | 4.59E-01 |
| LEPR            | -0.26 | 1.81E-01 | -0.15 | 4.59E-01 |
| MPND            | -0.11 | 5.92E-01 | 0.15  | 4.59E-01 |
| NDUFAF4         | 0.33  | 8.92E-02 | -0.15 | 4.59E-01 |
| PADI3           | -0.33 | 8.34E-02 | 0.15  | 4.59E-01 |
| PASK            | -0.20 | 3.20E-01 | -0.15 | 4.59E-01 |
| PGLS            | 0.21  | 2.91E-01 | 0.15  | 4.59E-01 |
| RABIF           | 0.04  | 8.51E-01 | 0.15  | 4.59E-01 |
| RN7SL512P       | -0.17 | 3.93E-01 | -0.15 | 4.59E-01 |
| RP11-2711.4     | 0.12  | 5.30E-01 | 0.15  | 4.59E-01 |
| RP11-455F5.4    | -0.09 | 6.43E-01 | -0.15 | 4.59E-01 |
| RP11-455J20.3   | -0.15 | 4.36E-01 | -0.15 | 4.59E-01 |
| TMEM2           | 0.19  | 3.31E-01 | -0.15 | 4.59E-01 |
| VLDLR-AS1       | -0.11 | 5.86E-01 | -0.15 | 4.59E-01 |
| ZBTB20-AS1      | 0.08  | 7.00E-01 | -0.15 | 4.59E-01 |
| ADAL            | 0.12  | 5.59E-01 | 0.15  | 4.60E-01 |
| C1orf111        | -0.15 | 4.34E-01 | -0.15 | 4.60E-01 |
| CTD-2201E9.1    | 0.04  | 8.52E-01 | -0.15 | 4.60E-01 |
| DAAM1           | 0.02  | 9.02E-01 | -0.15 | 4.60E-01 |
| DUTP2           | -0.21 | 2.73E-01 | -0.15 | 4.60E-01 |
| FGF2            | -0.13 | 5.01E-01 | -0.15 | 4.60E-01 |
| G16011          | 0.06  | 7.64E-01 | -0.15 | 4.60E-01 |
| GRK4            | 0.30  | 1.16E-01 | 0.15  | 4.60E-01 |
| KIAA0355        | -0.10 | 6.01E-01 | 0.15  | 4.60E-01 |
| KRT8            | -0.18 | 3.63E-01 | -0.15 | 4.60E-01 |
| LRP1            | -0.21 | 2.73E-01 | 0.15  | 4.60E-01 |
| LSR             | 0.25  | 2.07E-01 | 0.15  | 4.60E-01 |
| MOBP            | -0.20 | 3.18E-01 | -0.15 | 4.60E-01 |
| MRPL35P3        | 0.10  | 6.12E-01 | 0.15  | 4.60E-01 |
| NOL11           | 0.13  | 5.10E-01 | -0.15 | 4.60E-01 |
| PGAP3           | 0.14  | 4.79E-01 | 0.15  | 4.60E-01 |
| PHF3            | -0.17 | 3.83E-01 | -0.15 | 4.60E-01 |
| PNMA2           | 0.05  | 8.02E-01 | 0.15  | 4.60E-01 |
| RAB5A           | 0.31  | 1.12E-01 | 0.15  | 4.60E-01 |
| RAPGEF1         | 0.13  | 4.95E-01 | 0.15  | 4.60E-01 |
| RNU6-1050P      | -0.12 | 5.35E-01 | -0.15 | 4.60E-01 |
| RP11-181K12.1   | 0.13  | 5.19E-01 | 0.15  | 4.60E-01 |
| RP11-381E24.4   | -0.06 | 7.50E-01 | 0.15  | 4.60E-01 |
| RP11-47J17.3    | -0.34 | 7.61E-02 | -0.15 | 4.60E-01 |
| RP4-678D15.1    | 0.28  | 1.52E-01 | -0.15 | 4.60E-01 |
| SERBP1P3        | -0.17 | 3.81E-01 | -0.15 | 4.60E-01 |
| SLURP1          | 0.09  | 6.36E-01 | 0.15  | 4.60E-01 |
| SNORD116-19     | -0.06 | 7.47E-01 | -0.15 | 4.60E-01 |
| TRAF1           | 0.42  | 2.59E-02 | 0.15  | 4.60E-01 |
| XXbac-B444P24.8 | 0.20  | 2.97E-01 | 0.15  | 4.60E-01 |
| ZBTB20-AS2      | -0.12 | 5.55E-01 | -0.15 | 4.60E-01 |

|               |       |          |       |          |
|---------------|-------|----------|-------|----------|
| ZCCHC9        | 0.07  | 7.17E-01 | 0.15  | 4.60E-01 |
| ZNF843        | -0.03 | 8.66E-01 | 0.15  | 4.60E-01 |
| AC004156.3    | -0.01 | 9.57E-01 | 0.15  | 4.61E-01 |
| CHSY1         | -0.16 | 4.16E-01 | 0.15  | 4.61E-01 |
| CLDN11        | -0.12 | 5.33E-01 | 0.15  | 4.61E-01 |
| CRTC3-AS1     | 0.05  | 7.87E-01 | -0.15 | 4.61E-01 |
| CTD-3096M3.2  | -0.13 | 5.04E-01 | 0.15  | 4.61E-01 |
| CTD-3131K8.2  | -0.25 | 1.93E-01 | -0.15 | 4.61E-01 |
| H2AFZP1       | 0.08  | 6.98E-01 | -0.15 | 4.61E-01 |
| IVL           | 0.29  | 1.37E-01 | 0.15  | 4.61E-01 |
| KRTAP11-1     | -0.20 | 3.09E-01 | -0.15 | 4.61E-01 |
| LA16c-380H5.1 | -0.32 | 9.53E-02 | 0.15  | 4.61E-01 |
| LINC00877     | -0.05 | 7.96E-01 | -0.15 | 4.61E-01 |
| LINC01270     | -0.13 | 5.06E-01 | -0.15 | 4.61E-01 |
| LYSMD3        | 0.12  | 5.41E-01 | 0.15  | 4.61E-01 |
| LYST-AS1      | -0.14 | 4.71E-01 | -0.15 | 4.61E-01 |
| MTERF3        | 0.19  | 3.24E-01 | 0.15  | 4.61E-01 |
| PLXNB1        | -0.04 | 8.32E-01 | 0.15  | 4.61E-01 |
| RN7SKP26      | -0.09 | 6.39E-01 | 0.15  | 4.61E-01 |
| RNU6-122P     | 0.19  | 3.23E-01 | 0.15  | 4.61E-01 |
| RP11-1055B8.3 | -0.62 | 4.16E-04 | -0.15 | 4.61E-01 |
| RP11-111F5.8  | -0.05 | 7.95E-01 | -0.15 | 4.61E-01 |
| RP11-166P13.4 | 0.05  | 7.88E-01 | -0.15 | 4.61E-01 |
| RP11-263C24.3 | -0.16 | 4.08E-01 | -0.15 | 4.61E-01 |
| RP11-356I2.4  | -0.39 | 4.06E-02 | -0.15 | 4.61E-01 |
| RP11-434D2.11 | -0.09 | 6.55E-01 | 0.15  | 4.61E-01 |
| RP11-455F5.3  | 0.43  | 2.10E-02 | -0.15 | 4.61E-01 |
| RP11-46D1.2   | -0.06 | 7.60E-01 | 0.15  | 4.61E-01 |
| RP11-894J14.2 | 0.00  | 9.89E-01 | 0.15  | 4.61E-01 |
| RP13-923O23.6 | -0.21 | 2.82E-01 | 0.15  | 4.61E-01 |
| RP4-575N6.4   | 0.09  | 6.56E-01 | -0.15 | 4.61E-01 |
| RPSAP41       | -0.19 | 3.33E-01 | 0.15  | 4.61E-01 |
| SOX18         | -0.22 | 2.59E-01 | 0.15  | 4.61E-01 |
| ST18          | 0.02  | 9.16E-01 | -0.15 | 4.61E-01 |
| TP53INP2      | 0.14  | 4.80E-01 | 0.15  | 4.61E-01 |
| TRAF3IP3      | -0.07 | 7.40E-01 | -0.15 | 4.61E-01 |
| XLOC_011152   | 0.06  | 7.76E-01 | 0.15  | 4.61E-01 |
| XLOC_011448   | -0.24 | 2.18E-01 | 0.15  | 4.61E-01 |
| ZC3HAV1L      | 0.16  | 4.29E-01 | 0.15  | 4.61E-01 |
| ANKRD24       | -0.35 | 6.61E-02 | -0.15 | 4.62E-01 |
| COX6CP1       | 0.18  | 3.52E-01 | 0.15  | 4.62E-01 |
| CTC-338M12.6  | -0.04 | 8.28E-01 | -0.15 | 4.62E-01 |
| FSD2          | 0.04  | 8.54E-01 | -0.15 | 4.62E-01 |
| G26757        | 0.04  | 8.33E-01 | -0.15 | 4.62E-01 |
| G32126        | -0.28 | 1.55E-01 | -0.15 | 4.62E-01 |
| HSPA7         | 0.13  | 5.19E-01 | 0.15  | 4.62E-01 |
| ITM2B         | 0.15  | 4.39E-01 | 0.15  | 4.62E-01 |

|               |       |          |       |          |
|---------------|-------|----------|-------|----------|
| MMP1          | -0.06 | 7.68E-01 | 0.15  | 4.62E-01 |
| RAB23         | -0.01 | 9.75E-01 | 0.15  | 4.62E-01 |
| RNU6-580P     | -0.09 | 6.40E-01 | 0.15  | 4.62E-01 |
| RNU6-882P     | -0.33 | 9.04E-02 | -0.15 | 4.62E-01 |
| RP4-778K6.3   | 0.04  | 8.52E-01 | -0.15 | 4.62E-01 |
| SRSF6         | -0.05 | 7.93E-01 | -0.15 | 4.62E-01 |
| SRSF9         | 0.05  | 8.12E-01 | 0.15  | 4.62E-01 |
| SUMO1         | -0.12 | 5.31E-01 | -0.15 | 4.62E-01 |
| TGM2          | 0.18  | 3.60E-01 | -0.15 | 4.62E-01 |
| AC000123.2    | 0.00  | 9.93E-01 | -0.15 | 4.63E-01 |
| ACVR1C        | -0.18 | 3.49E-01 | 0.15  | 4.63E-01 |
| AKAP7         | 0.26  | 1.84E-01 | -0.15 | 4.63E-01 |
| BX322557.10   | 0.04  | 8.52E-01 | -0.15 | 4.63E-01 |
| C19orf80      | -0.14 | 4.63E-01 | 0.15  | 4.63E-01 |
| C2orf61       | -0.05 | 7.83E-01 | -0.15 | 4.63E-01 |
| CALCB         | 0.10  | 6.00E-01 | -0.15 | 4.63E-01 |
| COPS8         | -0.21 | 2.76E-01 | -0.15 | 4.63E-01 |
| CTD-2554C21.1 | -0.11 | 5.65E-01 | -0.15 | 4.63E-01 |
| FAM196B       | 0.15  | 4.34E-01 | -0.15 | 4.63E-01 |
| FBLN1         | -0.23 | 2.33E-01 | -0.15 | 4.63E-01 |
| FECH          | 0.14  | 4.70E-01 | -0.15 | 4.63E-01 |
| HNRNPA1P33    | 0.06  | 7.59E-01 | -0.15 | 4.63E-01 |
| KCND1         | -0.40 | 3.70E-02 | 0.15  | 4.63E-01 |
| KRAS          | -0.01 | 9.44E-01 | -0.15 | 4.63E-01 |
| LRRFIP1P1     | -0.23 | 2.29E-01 | 0.15  | 4.63E-01 |
| RBP2          | -0.13 | 5.00E-01 | -0.15 | 4.63E-01 |
| RP11-182N22.8 | -0.08 | 7.00E-01 | 0.15  | 4.63E-01 |
| RP5-1052I5.2  | 0.14  | 4.68E-01 | -0.15 | 4.63E-01 |
| SAMD11        | -0.14 | 4.86E-01 | 0.15  | 4.63E-01 |
| SPG11         | -0.10 | 6.28E-01 | -0.15 | 4.63E-01 |
| SPRR2D        | 0.21  | 2.91E-01 | 0.15  | 4.63E-01 |
| TRIM48        | -0.13 | 5.06E-01 | -0.15 | 4.63E-01 |
| TRUB1         | 0.29  | 1.40E-01 | 0.15  | 4.63E-01 |
| YRDC          | 0.06  | 7.79E-01 | -0.15 | 4.63E-01 |
| ZNRF2P3       | -0.22 | 2.68E-01 | 0.15  | 4.63E-01 |
| AC097721.1    | 0.01  | 9.78E-01 | 0.15  | 4.64E-01 |
| ARL4D         | 0.00  | 9.82E-01 | 0.15  | 4.64E-01 |
| CARNS1        | -0.14 | 4.83E-01 | -0.15 | 4.64E-01 |
| CD58          | 0.14  | 4.84E-01 | -0.15 | 4.64E-01 |
| CTC-425O23.5  | -0.01 | 9.79E-01 | -0.15 | 4.64E-01 |
| IGBP1P1       | -0.29 | 1.32E-01 | -0.15 | 4.64E-01 |
| LINC01023     | 0.09  | 6.43E-01 | -0.15 | 4.64E-01 |
| MED13L        | -0.24 | 2.26E-01 | -0.15 | 4.64E-01 |
| MIRLET7G      | 0.49  | 7.52E-03 | -0.15 | 4.64E-01 |
| MTIF3         | 0.06  | 7.59E-01 | 0.15  | 4.64E-01 |
| NNMT          | -0.18 | 3.48E-01 | -0.15 | 4.64E-01 |
| OR7E39P       | -0.05 | 7.82E-01 | 0.15  | 4.64E-01 |

|                        |       |          |       |          |
|------------------------|-------|----------|-------|----------|
| <b>RN7SL12P</b>        | -0.49 | 8.28E-03 | -0.15 | 4.64E-01 |
| <b>RN7SL80P</b>        | 0.45  | 1.66E-02 | 0.15  | 4.64E-01 |
| <b>RP11-133N21.7</b>   | -0.07 | 7.26E-01 | -0.15 | 4.64E-01 |
| <b>RP11-705O24.1</b>   | 0.16  | 4.10E-01 | -0.15 | 4.64E-01 |
| <b>RP3-337H4.8</b>     | 0.06  | 7.51E-01 | 0.15  | 4.64E-01 |
| <b>RP3-508I15.20</b>   | -0.14 | 4.81E-01 | 0.15  | 4.64E-01 |
| <b>SNORD8</b>          | -0.05 | 8.11E-01 | 0.15  | 4.64E-01 |
| <b>SPRR2E</b>          | 0.17  | 3.82E-01 | 0.15  | 4.64E-01 |
| <b>TPT1</b>            | 0.21  | 2.79E-01 | 0.15  | 4.64E-01 |
| <b>UGT1A5</b>          | -0.25 | 1.94E-01 | -0.15 | 4.64E-01 |
| <b>WDR75</b>           | 0.20  | 3.19E-01 | -0.15 | 4.64E-01 |
| <b>XLOC_008855</b>     | -0.34 | 7.72E-02 | -0.15 | 4.64E-01 |
| <b>ZNF841</b>          | -0.35 | 7.03E-02 | -0.15 | 4.64E-01 |
| <b>ADIPOR1</b>         | 0.13  | 4.94E-01 | 0.15  | 4.65E-01 |
| <b>AF213884.3</b>      | -0.30 | 1.27E-01 | 0.15  | 4.65E-01 |
| <b>CTD-3014M21.1</b>   | -0.02 | 9.05E-01 | 0.15  | 4.65E-01 |
| <b>CYP3A5</b>          | -0.21 | 2.77E-01 | -0.15 | 4.65E-01 |
| <b>CYP4F23P</b>        | 0.06  | 7.51E-01 | -0.15 | 4.65E-01 |
| <b>ERHP2</b>           | 0.13  | 4.99E-01 | 0.15  | 4.65E-01 |
| <b>GS1-54N10.1</b>     | 0.10  | 6.29E-01 | 0.15  | 4.65E-01 |
| <b>H3F3AP4</b>         | -0.13 | 5.21E-01 | -0.15 | 4.65E-01 |
| <b>IQCJ-SCHIP1-AS1</b> | -0.07 | 7.38E-01 | 0.15  | 4.65E-01 |
| <b>LINC01012</b>       | 0.02  | 9.02E-01 | 0.15  | 4.65E-01 |
| <b>LLPHP2</b>          | 0.06  | 7.72E-01 | -0.15 | 4.65E-01 |
| <b>MAPK13</b>          | 0.15  | 4.47E-01 | 0.15  | 4.65E-01 |
| <b>MIR17HG</b>         | 0.21  | 2.87E-01 | -0.15 | 4.65E-01 |
| <b>MTMR12</b>          | -0.06 | 7.48E-01 | -0.15 | 4.65E-01 |
| <b>NSRP1</b>           | -0.11 | 5.86E-01 | 0.15  | 4.65E-01 |
| <b>OMA1</b>            | 0.02  | 9.37E-01 | 0.15  | 4.65E-01 |
| <b>PDCD6IP</b>         | 0.06  | 7.67E-01 | -0.15 | 4.65E-01 |
| <b>RNU6-167P</b>       | 0.07  | 7.22E-01 | -0.15 | 4.65E-01 |
| <b>RNU6-850P</b>       | -0.01 | 9.79E-01 | -0.15 | 4.65E-01 |
| <b>RP11-295D4.4</b>    | 0.05  | 7.89E-01 | 0.15  | 4.65E-01 |
| <b>RP11-398C13.6</b>   | -0.26 | 1.81E-01 | -0.15 | 4.65E-01 |
| <b>RP11-529A4.7</b>    | 0.39  | 4.28E-02 | -0.15 | 4.65E-01 |
| <b>RP11-793H13.10</b>  | 0.12  | 5.51E-01 | -0.15 | 4.65E-01 |
| <b>RP4-697P8.3</b>     | -0.29 | 1.29E-01 | -0.15 | 4.65E-01 |
| <b>SEPT14P4</b>        | -0.26 | 1.77E-01 | -0.15 | 4.65E-01 |
| <b>SKA2</b>            | 0.09  | 6.47E-01 | 0.15  | 4.65E-01 |
| <b>SLC46A1</b>         | 0.00  | 9.81E-01 | -0.15 | 4.65E-01 |
| <b>ZNF3</b>            | 0.14  | 4.85E-01 | -0.15 | 4.65E-01 |
| <b>AC084219.4</b>      | 0.08  | 6.93E-01 | -0.15 | 4.66E-01 |
| <b>AC090286.4</b>      | -0.08 | 7.02E-01 | -0.15 | 4.66E-01 |
| <b>AC114730.11</b>     | -0.12 | 5.42E-01 | -0.15 | 4.66E-01 |
| <b>CENPV</b>           | 0.03  | 8.83E-01 | -0.15 | 4.66E-01 |
| <b>CNTD1</b>           | 0.00  | 1.00E+00 | -0.15 | 4.66E-01 |
| <b>CTB-20D2.1</b>      | -0.01 | 9.49E-01 | -0.15 | 4.66E-01 |

|                      |       |          |       |          |
|----------------------|-------|----------|-------|----------|
| <b>CTB-96E2.6</b>    | 0.08  | 6.75E-01 | -0.15 | 4.66E-01 |
| <b>CYP2A6</b>        | 0.25  | 2.00E-01 | -0.15 | 4.66E-01 |
| <b>ENTPD1-AS1</b>    | 0.02  | 9.23E-01 | -0.15 | 4.66E-01 |
| <b>GPRASP1</b>       | -0.06 | 7.43E-01 | -0.15 | 4.66E-01 |
| <b>MEGF11</b>        | -0.15 | 4.56E-01 | -0.15 | 4.66E-01 |
| <b>NFIB</b>          | -0.36 | 6.03E-02 | -0.15 | 4.66E-01 |
| <b>PKI55</b>         | 0.28  | 1.53E-01 | -0.15 | 4.66E-01 |
| <b>POU3F3</b>        | -0.26 | 1.86E-01 | -0.15 | 4.66E-01 |
| <b>RNF5P1</b>        | -0.16 | 4.11E-01 | -0.15 | 4.66E-01 |
| <b>RP11-115N4.1</b>  | -0.17 | 4.00E-01 | -0.15 | 4.66E-01 |
| <b>RP11-132M7.3</b>  | -0.27 | 1.62E-01 | -0.15 | 4.66E-01 |
| <b>RP11-30K9.5</b>   | -0.25 | 2.06E-01 | -0.15 | 4.66E-01 |
| <b>RP11-488L18.3</b> | 0.06  | 7.60E-01 | -0.15 | 4.66E-01 |
| <b>UPB1</b>          | -0.04 | 8.38E-01 | -0.15 | 4.66E-01 |
| <b>CCNE1</b>         | 0.15  | 4.54E-01 | 0.15  | 4.66E-01 |
| <b>CXCL11</b>        | 0.07  | 7.41E-01 | 0.15  | 4.66E-01 |
| <b>EIF3J-AS1</b>     | -0.21 | 2.75E-01 | 0.15  | 4.66E-01 |
| <b>G26252</b>        | 0.09  | 6.49E-01 | 0.15  | 4.66E-01 |
| <b>KRT18P59</b>      | 0.06  | 7.51E-01 | 0.15  | 4.66E-01 |
| <b>LPCAT2</b>        | 0.08  | 6.92E-01 | 0.15  | 4.66E-01 |
| <b>MIF-AS1</b>       | -0.28 | 1.51E-01 | 0.15  | 4.66E-01 |
| <b>RP11-10A14.5</b>  | 0.11  | 5.61E-01 | 0.15  | 4.66E-01 |
| <b>RP11-348B17.1</b> | -0.44 | 1.94E-02 | 0.15  | 4.66E-01 |
| <b>SCARB2</b>        | 0.33  | 8.21E-02 | 0.15  | 4.66E-01 |
| <b>SNORD46</b>       | 0.07  | 7.18E-01 | 0.15  | 4.66E-01 |
| <b>TATDN2P2</b>      | 0.18  | 3.51E-01 | 0.15  | 4.66E-01 |
| <b>TMPO-AS1</b>      | -0.16 | 4.06E-01 | 0.15  | 4.66E-01 |
| <b>ZBED8</b>         | -0.09 | 6.54E-01 | 0.15  | 4.66E-01 |
| <b>ABHD14B</b>       | 0.11  | 5.66E-01 | 0.15  | 4.67E-01 |
| <b>AC005042.5</b>    | 0.01  | 9.61E-01 | -0.15 | 4.67E-01 |
| <b>CD34</b>          | -0.15 | 4.44E-01 | 0.15  | 4.67E-01 |
| <b>DBF4B</b>         | 0.04  | 8.38E-01 | 0.15  | 4.67E-01 |
| <b>FUT9</b>          | -0.04 | 8.59E-01 | -0.15 | 4.67E-01 |
| <b>G10019</b>        | 0.12  | 5.36E-01 | -0.15 | 4.67E-01 |
| <b>G10021</b>        | 0.27  | 1.59E-01 | -0.15 | 4.67E-01 |
| <b>G12194</b>        | 0.00  | 9.83E-01 | -0.15 | 4.67E-01 |
| <b>G17366</b>        | -0.03 | 8.74E-01 | -0.15 | 4.67E-01 |
| <b>HEATR9</b>        | -0.22 | 2.57E-01 | -0.15 | 4.67E-01 |
| <b>IGHV3-48</b>      | 0.38  | 4.62E-02 | 0.15  | 4.67E-01 |
| <b>IL36RN</b>        | 0.27  | 1.72E-01 | 0.15  | 4.67E-01 |
| <b>KRT71</b>         | -0.06 | 7.65E-01 | 0.15  | 4.67E-01 |
| <b>KSR2</b>          | 0.37  | 5.14E-02 | -0.15 | 4.67E-01 |
| <b>LILRA4</b>        | 0.19  | 3.36E-01 | 0.15  | 4.67E-01 |
| <b>MCCC1</b>         | 0.01  | 9.42E-01 | 0.15  | 4.67E-01 |
| <b>MXRA8</b>         | -0.27 | 1.70E-01 | 0.15  | 4.67E-01 |
| <b>PDE12</b>         | 0.30  | 1.20E-01 | -0.15 | 4.67E-01 |
| <b>PLEKHG4</b>       | 0.34  | 7.59E-02 | 0.15  | 4.67E-01 |



|                |       |          |       |          |
|----------------|-------|----------|-------|----------|
| PTBP2          | -0.15 | 4.33E-01 | -0.15 | 4.67E-01 |
| RAD21          | 0.02  | 9.06E-01 | 0.15  | 4.67E-01 |
| RAP1GAP2       | 0.22  | 2.67E-01 | 0.15  | 4.67E-01 |
| RARG           | 0.25  | 1.92E-01 | -0.15 | 4.67E-01 |
| RNF11          | 0.38  | 4.41E-02 | 0.15  | 4.67E-01 |
| RP11-247I13.3  | -0.01 | 9.53E-01 | 0.15  | 4.67E-01 |
| RP11-350J20.12 | 0.10  | 6.11E-01 | 0.15  | 4.67E-01 |
| RP11-36I17.2   | -0.31 | 1.10E-01 | 0.15  | 4.67E-01 |
| RP11-537H15.3  | 0.15  | 4.45E-01 | -0.15 | 4.67E-01 |
| RP11-759A24.1  | -0.01 | 9.77E-01 | 0.15  | 4.67E-01 |
| SARAF          | -0.03 | 8.65E-01 | -0.15 | 4.67E-01 |
| SEMA5A         | -0.11 | 5.90E-01 | -0.15 | 4.67E-01 |
| SHFM1          | -0.05 | 7.97E-01 | 0.15  | 4.67E-01 |
| ST3GAL3        | -0.07 | 7.25E-01 | 0.15  | 4.67E-01 |
| VIPR2          | -0.03 | 8.82E-01 | 0.15  | 4.67E-01 |
| VWA9           | 0.08  | 6.81E-01 | 0.15  | 4.67E-01 |
| WDR90          | -0.13 | 5.15E-01 | -0.15 | 4.67E-01 |
| bP-21264C1.1   | -0.05 | 7.89E-01 | 0.15  | 4.67E-01 |
| ADGRL4         | -0.32 | 9.99E-02 | -0.15 | 4.67E-01 |
| AP000654.4     | -0.18 | 3.67E-01 | 0.15  | 4.67E-01 |
| CD300LG        | -0.10 | 6.15E-01 | 0.15  | 4.67E-01 |
| CDSN           | 0.42  | 2.71E-02 | 0.15  | 4.67E-01 |
| CYTH2          | -0.23 | 2.49E-01 | 0.15  | 4.67E-01 |
| DTX2P1         | -0.18 | 3.66E-01 | 0.15  | 4.67E-01 |
| E4F1           | -0.07 | 7.26E-01 | -0.15 | 4.67E-01 |
| FCER1A         | 0.16  | 4.06E-01 | -0.15 | 4.67E-01 |
| G30965         | -0.17 | 3.79E-01 | -0.15 | 4.67E-01 |
| G31765         | -0.27 | 1.67E-01 | -0.15 | 4.67E-01 |
| IER5           | 0.30  | 1.17E-01 | 0.15  | 4.67E-01 |
| NAIP           | 0.11  | 5.82E-01 | 0.15  | 4.67E-01 |
| NRG3           | -0.21 | 2.80E-01 | -0.15 | 4.67E-01 |
| OAZ1           | 0.13  | 4.94E-01 | 0.15  | 4.67E-01 |
| RP11-1079K10.3 | -0.15 | 4.59E-01 | -0.15 | 4.67E-01 |
| RP11-166B2.5   | 0.35  | 7.12E-02 | -0.15 | 4.67E-01 |
| RP11-225N10.1  | 0.09  | 6.64E-01 | 0.15  | 4.67E-01 |
| RP11-365O16.5  | 0.06  | 7.64E-01 | -0.15 | 4.67E-01 |
| RP11-540A21.2  | -0.02 | 9.37E-01 | -0.15 | 4.67E-01 |
| RP11-54O7.17   | 0.02  | 9.36E-01 | 0.15  | 4.67E-01 |
| RP11-798G7.7   | -0.16 | 4.29E-01 | -0.15 | 4.67E-01 |
| SETD7          | 0.08  | 6.74E-01 | -0.15 | 4.67E-01 |
| SLC6A2         | -0.07 | 7.33E-01 | -0.15 | 4.67E-01 |
| TPI1           | 0.20  | 2.97E-01 | 0.15  | 4.67E-01 |
| WEE2-AS1       | 0.26  | 1.85E-01 | 0.15  | 4.67E-01 |
| YBX1P6         | -0.02 | 9.13E-01 | 0.15  | 4.67E-01 |
| Z83844.1       | 0.12  | 5.52E-01 | -0.15 | 4.67E-01 |
| ZMAT5          | 0.10  | 6.27E-01 | 0.15  | 4.67E-01 |
| ZNF849P        | 0.20  | 3.14E-01 | 0.15  | 4.67E-01 |

|               |       |          |       |          |
|---------------|-------|----------|-------|----------|
| AL138498.1    | -0.07 | 7.24E-01 | -0.15 | 4.68E-01 |
| CTD-3076O17.2 | -0.02 | 9.20E-01 | -0.15 | 4.68E-01 |
| DDAH2         | -0.15 | 4.37E-01 | -0.15 | 4.68E-01 |
| DHX38         | -0.16 | 4.04E-01 | 0.15  | 4.68E-01 |
| ESYT2         | -0.10 | 6.18E-01 | -0.15 | 4.68E-01 |
| FBXL20        | -0.02 | 9.17E-01 | 0.15  | 4.68E-01 |
| G39828        | -0.40 | 3.43E-02 | 0.15  | 4.68E-01 |
| G7052         | 0.10  | 5.99E-01 | -0.15 | 4.68E-01 |
| GRIN3B        | 0.01  | 9.47E-01 | 0.15  | 4.68E-01 |
| MAP3K8        | -0.29 | 1.33E-01 | -0.15 | 4.68E-01 |
| MOCOS         | -0.04 | 8.50E-01 | -0.15 | 4.68E-01 |
| NALCN         | -0.25 | 2.06E-01 | 0.15  | 4.68E-01 |
| NCOA7-AS1     | -0.20 | 2.98E-01 | -0.15 | 4.68E-01 |
| NHEJ1         | 0.34  | 7.69E-02 | -0.15 | 4.68E-01 |
| RAB27B        | 0.18  | 3.68E-01 | -0.15 | 4.68E-01 |
| RNU6-1171P    | 0.19  | 3.21E-01 | -0.15 | 4.68E-01 |
| RNU7-119P     | -0.27 | 1.72E-01 | -0.15 | 4.68E-01 |
| RNU7-123P     | 0.23  | 2.37E-01 | -0.15 | 4.68E-01 |
| RP1-288H2.2   | -0.35 | 6.98E-02 | -0.15 | 4.68E-01 |
| RP1-317E23.3  | -0.29 | 1.33E-01 | 0.15  | 4.68E-01 |
| RP1-86D1.5    | 0.12  | 5.46E-01 | 0.15  | 4.68E-01 |
| RP11-204K16.1 | -0.03 | 8.83E-01 | 0.15  | 4.68E-01 |
| RP11-401N16.2 | -0.05 | 7.99E-01 | 0.15  | 4.68E-01 |
| RP11-403I13.7 | 0.25  | 1.92E-01 | -0.15 | 4.68E-01 |
| RP11-91P24.1  | -0.09 | 6.44E-01 | 0.15  | 4.68E-01 |
| RPL23AP77     | -0.05 | 7.97E-01 | 0.15  | 4.68E-01 |
| RSPH6A        | 0.15  | 4.61E-01 | 0.15  | 4.68E-01 |
| SIGLEC17P     | 0.13  | 5.04E-01 | -0.15 | 4.68E-01 |
| SPINT4        | -0.03 | 8.62E-01 | 0.15  | 4.68E-01 |
| TBC1D7        | -0.22 | 2.63E-01 | 0.15  | 4.68E-01 |
| TRGV9         | 0.11  | 5.93E-01 | 0.15  | 4.68E-01 |
| TRIM36        | 0.35  | 6.61E-02 | -0.15 | 4.68E-01 |
| UNC119        | -0.01 | 9.56E-01 | 0.15  | 4.68E-01 |
| XLOC_000852   | 0.07  | 7.19E-01 | 0.15  | 4.68E-01 |
| AC073569.1    | -0.13 | 5.04E-01 | -0.15 | 4.69E-01 |
| AC092964.1    | -0.44 | 1.89E-02 | -0.15 | 4.69E-01 |
| CMPK1         | 0.15  | 4.31E-01 | -0.15 | 4.69E-01 |
| DMRT2         | 0.23  | 2.44E-01 | -0.15 | 4.69E-01 |
| DSCAS         | 0.10  | 6.25E-01 | -0.15 | 4.69E-01 |
| FAM66B        | 0.23  | 2.35E-01 | -0.15 | 4.69E-01 |
| G24850        | 0.04  | 8.36E-01 | -0.15 | 4.69E-01 |
| IL7           | 0.07  | 7.20E-01 | -0.15 | 4.69E-01 |
| KHDRBS3       | 0.12  | 5.30E-01 | -0.15 | 4.69E-01 |
| MAZ           | 0.03  | 8.65E-01 | 0.15  | 4.69E-01 |
| MEOX2         | -0.39 | 4.10E-02 | 0.15  | 4.69E-01 |
| MIR4512       | 0.00  | 9.90E-01 | -0.15 | 4.69E-01 |
| NFKBIA        | 0.14  | 4.78E-01 | 0.15  | 4.69E-01 |

|                |       |          |       |          |
|----------------|-------|----------|-------|----------|
| PHF5A          | 0.04  | 8.38E-01 | -0.15 | 4.69E-01 |
| RNU6-574P      | -0.11 | 5.82E-01 | -0.15 | 4.69E-01 |
| RP11-176H8.3   | 0.20  | 3.16E-01 | 0.15  | 4.69E-01 |
| RP11-182L21.5  | -0.16 | 4.19E-01 | -0.15 | 4.69E-01 |
| RP11-266L9.8   | -0.17 | 3.96E-01 | 0.15  | 4.69E-01 |
| RP11-503N18.5  | 0.06  | 7.70E-01 | -0.15 | 4.69E-01 |
| RP11-718B12.5  | -0.16 | 4.12E-01 | 0.15  | 4.69E-01 |
| SERPINB9       | 0.23  | 2.48E-01 | 0.15  | 4.69E-01 |
| SPOP           | -0.04 | 8.45E-01 | 0.15  | 4.69E-01 |
| SUMO2          | 0.14  | 4.66E-01 | -0.15 | 4.69E-01 |
| UGT8           | -0.19 | 3.31E-01 | -0.15 | 4.69E-01 |
| AL049758.2     | -0.11 | 5.87E-01 | 0.15  | 4.70E-01 |
| ARG2           | 0.19  | 3.32E-01 | 0.15  | 4.70E-01 |
| C9orf170       | -0.32 | 9.99E-02 | 0.15  | 4.70E-01 |
| CBLC           | 0.27  | 1.59E-01 | 0.15  | 4.70E-01 |
| HDAC8          | 0.24  | 2.17E-01 | 0.15  | 4.70E-01 |
| LENG8-AS1      | 0.28  | 1.48E-01 | 0.15  | 4.70E-01 |
| LINC01564      | 0.13  | 5.14E-01 | 0.15  | 4.70E-01 |
| MTHFD1P1       | -0.06 | 7.57E-01 | 0.15  | 4.70E-01 |
| RP11-147L13.15 | -0.04 | 8.28E-01 | 0.15  | 4.70E-01 |
| RP11-699L21.1  | -0.13 | 5.00E-01 | 0.15  | 4.70E-01 |
| TUFT1          | -0.20 | 3.20E-01 | 0.15  | 4.70E-01 |
| TUG1           | -0.14 | 4.81E-01 | 0.15  | 4.70E-01 |
| VNN3           | 0.27  | 1.67E-01 | 0.15  | 4.70E-01 |
| AC006461.2     | 0.27  | 1.68E-01 | -0.15 | 4.70E-01 |
| AC108456.1     | -0.42 | 2.60E-02 | -0.15 | 4.70E-01 |
| AP000640.10    | 0.11  | 5.62E-01 | -0.15 | 4.70E-01 |
| CPLX1          | -0.04 | 8.52E-01 | -0.15 | 4.70E-01 |
| CTB-31N19.3    | -0.24 | 2.10E-01 | -0.15 | 4.70E-01 |
| RANBP6         | -0.01 | 9.67E-01 | -0.15 | 4.70E-01 |
| RNU6-1141P     | -0.06 | 7.73E-01 | -0.15 | 4.70E-01 |
| RP11-122C5.2   | -0.26 | 1.77E-01 | -0.15 | 4.70E-01 |
| RP11-379J5.5   | 0.04  | 8.52E-01 | -0.15 | 4.70E-01 |
| RP11-490K7.4   | -0.10 | 5.97E-01 | -0.15 | 4.70E-01 |
| RP11-77P6.2    | 0.04  | 8.27E-01 | -0.15 | 4.70E-01 |
| RP11-863P13.6  | 0.18  | 3.60E-01 | -0.15 | 4.70E-01 |
| RP11-96C23.14  | 0.18  | 3.52E-01 | -0.15 | 4.70E-01 |
| RPP21          | -0.12 | 5.41E-01 | -0.15 | 4.70E-01 |
| RPSAP70        | -0.42 | 2.53E-02 | -0.15 | 4.70E-01 |
| USP17L4        | -0.10 | 6.25E-01 | -0.15 | 4.70E-01 |
| XLOC_010144    | -0.16 | 4.09E-01 | -0.15 | 4.70E-01 |
| ALDH1L1        | -0.14 | 4.66E-01 | -0.14 | 4.71E-01 |
| C14orf105      | -0.14 | 4.90E-01 | -0.14 | 4.71E-01 |
| CH507-42P11.7  | -0.08 | 6.96E-01 | -0.14 | 4.71E-01 |
| CTD-2353F22.1  | -0.09 | 6.59E-01 | -0.14 | 4.71E-01 |
| DNAJC19P7      | -0.01 | 9.79E-01 | -0.14 | 4.71E-01 |
| EPDR1          | -0.27 | 1.58E-01 | -0.14 | 4.71E-01 |

|               |       |          |       |          |
|---------------|-------|----------|-------|----------|
| EYS           | -0.17 | 3.91E-01 | -0.14 | 4.71E-01 |
| PATL2         | -0.18 | 3.58E-01 | -0.14 | 4.71E-01 |
| PDGFB         | -0.17 | 3.96E-01 | -0.14 | 4.71E-01 |
| PSMD10P1      | -0.04 | 8.46E-01 | -0.14 | 4.71E-01 |
| RAB40B        | -0.12 | 5.44E-01 | -0.14 | 4.71E-01 |
| RNU6-74P      | -0.01 | 9.51E-01 | -0.14 | 4.71E-01 |
| RP11-35J10.6  | -0.16 | 4.06E-01 | -0.14 | 4.71E-01 |
| RP11-503E24.2 | 0.16  | 4.30E-01 | -0.14 | 4.71E-01 |
| RP11-673F18.1 | 0.04  | 8.53E-01 | -0.14 | 4.71E-01 |
| RP11-864I4.4  | -0.18 | 3.69E-01 | -0.14 | 4.71E-01 |
| SLC27A5       | -0.07 | 7.30E-01 | -0.14 | 4.71E-01 |
| TVP23B        | 0.16  | 4.12E-01 | -0.14 | 4.71E-01 |
| ZNF37BP       | -0.27 | 1.71E-01 | -0.14 | 4.71E-01 |
| AC090616.2    | -0.06 | 7.65E-01 | 0.14  | 4.71E-01 |
| ACTC1         | 0.12  | 5.48E-01 | 0.14  | 4.71E-01 |
| C22orf39      | -0.29 | 1.29E-01 | 0.14  | 4.71E-01 |
| COX7CP1       | -0.16 | 4.03E-01 | 0.14  | 4.71E-01 |
| GCDH          | 0.31  | 1.04E-01 | 0.14  | 4.71E-01 |
| HIST2H2AA4    | -0.04 | 8.50E-01 | 0.14  | 4.71E-01 |
| KLHL2P1       | -0.20 | 3.01E-01 | 0.14  | 4.71E-01 |
| LGALS1        | -0.21 | 2.95E-01 | 0.14  | 4.71E-01 |
| LMO2          | 0.25  | 1.93E-01 | 0.14  | 4.71E-01 |
| PTGER3        | 0.15  | 4.58E-01 | 0.14  | 4.71E-01 |
| RNFT2         | 0.12  | 5.33E-01 | 0.14  | 4.71E-01 |
| RNU6-1053P    | -0.12 | 5.53E-01 | 0.14  | 4.71E-01 |
| SNX6          | 0.20  | 3.08E-01 | 0.14  | 4.71E-01 |
| SYNGAP1       | 0.13  | 5.07E-01 | 0.14  | 4.71E-01 |
| ABCC11        | -0.11 | 5.86E-01 | -0.14 | 4.72E-01 |
| AC079610.1    | 0.03  | 8.77E-01 | -0.14 | 4.72E-01 |
| AC093627.9    | 0.17  | 3.79E-01 | 0.14  | 4.72E-01 |
| ACVR1B        | -0.09 | 6.54E-01 | 0.14  | 4.72E-01 |
| AGMO          | 0.12  | 5.35E-01 | 0.14  | 4.72E-01 |
| B3GALNT1P1    | 0.34  | 7.79E-02 | -0.14 | 4.72E-01 |
| CCNH          | 0.14  | 4.65E-01 | -0.14 | 4.72E-01 |
| CRNN          | -0.02 | 9.03E-01 | -0.14 | 4.72E-01 |
| CTB-31O20.8   | 0.05  | 8.14E-01 | 0.14  | 4.72E-01 |
| CTD-2269F5.1  | -0.39 | 3.97E-02 | -0.14 | 4.72E-01 |
| CTGLF12P      | -0.11 | 5.84E-01 | -0.14 | 4.72E-01 |
| DBF4P1        | 0.03  | 8.61E-01 | -0.14 | 4.72E-01 |
| EZR           | -0.25 | 2.04E-01 | -0.14 | 4.72E-01 |
| FPGT-TNNI3K   | -0.03 | 8.79E-01 | -0.14 | 4.72E-01 |
| HSD17B1P1     | 0.32  | 9.84E-02 | -0.14 | 4.72E-01 |
| LY86-AS1      | 0.20  | 2.98E-01 | -0.14 | 4.72E-01 |
| MAP7D2        | 0.37  | 5.58E-02 | 0.14  | 4.72E-01 |
| NAT6          | 0.20  | 3.02E-01 | 0.14  | 4.72E-01 |
| NCOA4         | 0.04  | 8.30E-01 | -0.14 | 4.72E-01 |
| NUTM2B        | 0.18  | 3.47E-01 | -0.14 | 4.72E-01 |

|               |       |          |       |          |
|---------------|-------|----------|-------|----------|
| PDZD3         | -0.35 | 6.91E-02 | -0.14 | 4.72E-01 |
| PRKRIRP7      | 0.31  | 1.10E-01 | -0.14 | 4.72E-01 |
| RAB3IL1       | -0.18 | 3.57E-01 | -0.14 | 4.72E-01 |
| RCC2P4        | 0.11  | 5.70E-01 | -0.14 | 4.72E-01 |
| RN7SKP150     | -0.18 | 3.57E-01 | 0.14  | 4.72E-01 |
| RN7SL45P      | -0.13 | 4.94E-01 | 0.14  | 4.72E-01 |
| RN7SL81P      | -0.27 | 1.67E-01 | 0.14  | 4.72E-01 |
| RP11-280K24.4 | 0.02  | 9.17E-01 | -0.14 | 4.72E-01 |
| RP11-351M16.4 | 0.14  | 4.76E-01 | 0.14  | 4.72E-01 |
| RP11-420A6.2  | -0.03 | 8.86E-01 | -0.14 | 4.72E-01 |
| RP11-454L9.2  | -0.63 | 3.00E-04 | -0.14 | 4.72E-01 |
| RP11-70D24.3  | 0.32  | 9.36E-02 | -0.14 | 4.72E-01 |
| THBD          | 0.38  | 4.78E-02 | 0.14  | 4.72E-01 |
| TRAJ29        | 0.23  | 2.29E-01 | -0.14 | 4.72E-01 |
| UBN2          | -0.29 | 1.33E-01 | -0.14 | 4.72E-01 |
| ZNF525        | -0.20 | 2.97E-01 | -0.14 | 4.72E-01 |
| AC011752.1    | 0.00  | 9.91E-01 | -0.14 | 4.73E-01 |
| ACP6          | -0.07 | 7.14E-01 | -0.14 | 4.73E-01 |
| ACTN4         | 0.07  | 7.35E-01 | -0.14 | 4.73E-01 |
| AF196970.3    | 0.02  | 9.34E-01 | -0.14 | 4.73E-01 |
| DLG1          | -0.04 | 8.29E-01 | -0.14 | 4.73E-01 |
| GGTA1P        | 0.21  | 2.85E-01 | 0.14  | 4.73E-01 |
| KRTAP16-1     | -0.09 | 6.39E-01 | 0.14  | 4.73E-01 |
| NF1           | -0.15 | 4.54E-01 | -0.14 | 4.73E-01 |
| RC3H1-IT1     | -0.17 | 3.78E-01 | -0.14 | 4.73E-01 |
| RP11-521L9.2  | 0.05  | 8.10E-01 | 0.14  | 4.73E-01 |
| RP13-216E22.5 | 0.16  | 4.24E-01 | -0.14 | 4.73E-01 |
| RP3-525L6.2   | -0.11 | 5.71E-01 | 0.14  | 4.73E-01 |
| RP5-1107A17.3 | -0.23 | 2.29E-01 | 0.14  | 4.73E-01 |
| SMIM1         | 0.09  | 6.54E-01 | 0.14  | 4.73E-01 |
| STPG1         | 0.31  | 1.14E-01 | -0.14 | 4.73E-01 |
| TMEM182       | 0.25  | 1.96E-01 | 0.14  | 4.73E-01 |
| XLOC_001065   | -0.10 | 6.17E-01 | 0.14  | 4.73E-01 |
| YWHAZP3       | -0.15 | 4.45E-01 | 0.14  | 4.73E-01 |
| ATP5H         | 0.01  | 9.51E-01 | 0.14  | 4.74E-01 |
| C17orf96      | 0.12  | 5.38E-01 | 0.14  | 4.74E-01 |
| C6orf1        | -0.01 | 9.77E-01 | 0.14  | 4.74E-01 |
| KEAP1         | 0.08  | 6.69E-01 | 0.14  | 4.74E-01 |
| RP11-1055B8.9 | -0.06 | 7.46E-01 | 0.14  | 4.74E-01 |
| RP11-192N10.2 | 0.11  | 5.85E-01 | 0.14  | 4.74E-01 |
| RP11-713P17.5 | -0.12 | 5.55E-01 | 0.14  | 4.74E-01 |
| RP11-88H9.2   | 0.31  | 1.09E-01 | 0.14  | 4.74E-01 |
| SNW1          | 0.02  | 9.37E-01 | 0.14  | 4.74E-01 |
| SYNGR2        | 0.19  | 3.36E-01 | 0.14  | 4.74E-01 |
| TUT1          | 0.05  | 7.87E-01 | 0.14  | 4.74E-01 |
| ZBTB8OSP1     | -0.21 | 2.76E-01 | 0.14  | 4.74E-01 |
| AC004837.5    | 0.06  | 7.72E-01 | -0.14 | 4.74E-01 |

|               |       |          |       |          |
|---------------|-------|----------|-------|----------|
| AC026271.5    | -0.04 | 8.30E-01 | -0.14 | 4.74E-01 |
| BBS2          | -0.25 | 2.07E-01 | -0.14 | 4.74E-01 |
| EIF1P6        | 0.27  | 1.68E-01 | -0.14 | 4.74E-01 |
| FBXL3         | -0.12 | 5.52E-01 | -0.14 | 4.74E-01 |
| GK-IT1        | 0.04  | 8.52E-01 | -0.14 | 4.74E-01 |
| HMG1P2        | -0.12 | 5.56E-01 | -0.14 | 4.74E-01 |
| MTMR8         | -0.12 | 5.49E-01 | -0.14 | 4.74E-01 |
| MXD3          | 0.04  | 8.31E-01 | -0.14 | 4.74E-01 |
| RP11-17E4.1   | -0.13 | 5.12E-01 | -0.14 | 4.74E-01 |
| XLOC_004069   | -0.07 | 7.23E-01 | -0.14 | 4.74E-01 |
| AC069154.4    | 0.17  | 3.96E-01 | -0.14 | 4.75E-01 |
| AC083899.3    | 0.04  | 8.59E-01 | -0.14 | 4.75E-01 |
| AL035610.2    | -0.11 | 5.81E-01 | -0.14 | 4.75E-01 |
| C16orf72      | 0.30  | 1.18E-01 | 0.14  | 4.75E-01 |
| CAPZA2        | 0.04  | 8.57E-01 | -0.14 | 4.75E-01 |
| CCDC74B       | 0.18  | 3.62E-01 | -0.14 | 4.75E-01 |
| KCTD14        | 0.04  | 8.45E-01 | -0.14 | 4.75E-01 |
| LRPAP1        | 0.18  | 3.66E-01 | 0.14  | 4.75E-01 |
| MLLT10P1      | 0.16  | 4.13E-01 | -0.14 | 4.75E-01 |
| MOCS1         | 0.14  | 4.68E-01 | 0.14  | 4.75E-01 |
| NKAPP1        | -0.23 | 2.50E-01 | -0.14 | 4.75E-01 |
| PPM1D         | 0.24  | 2.24E-01 | 0.14  | 4.75E-01 |
| RNF212B       | -0.09 | 6.35E-01 | -0.14 | 4.75E-01 |
| ROGDI         | 0.14  | 4.84E-01 | 0.14  | 4.75E-01 |
| RP11-144G7.2  | -0.29 | 1.40E-01 | 0.14  | 4.75E-01 |
| RP11-245C17.2 | -0.03 | 8.95E-01 | 0.14  | 4.75E-01 |
| RP11-342M21.2 | -0.13 | 5.20E-01 | 0.14  | 4.75E-01 |
| RP11-567M16.2 | -0.20 | 3.01E-01 | 0.14  | 4.75E-01 |
| RP5-1142J19.2 | 0.14  | 4.91E-01 | -0.14 | 4.75E-01 |
| SCAMP1-AS1    | 0.05  | 8.08E-01 | 0.14  | 4.75E-01 |
| XLOC_007942   | -0.25 | 2.07E-01 | -0.14 | 4.75E-01 |
| XLOC_013263   | -0.17 | 3.79E-01 | -0.14 | 4.75E-01 |
| ZNF713        | -0.01 | 9.51E-01 | -0.14 | 4.75E-01 |
| AC147651.4    | 0.23  | 2.31E-01 | -0.14 | 4.76E-01 |
| CCDC124       | 0.03  | 8.62E-01 | 0.14  | 4.76E-01 |
| CTB-113P19.5  | -0.10 | 5.95E-01 | 0.14  | 4.76E-01 |
| CTD-2270P14.1 | -0.12 | 5.30E-01 | -0.14 | 4.76E-01 |
| CUEDC2        | -0.09 | 6.63E-01 | 0.14  | 4.76E-01 |
| DUSP23        | -0.06 | 7.45E-01 | 0.14  | 4.76E-01 |
| GSC           | 0.59  | 9.64E-04 | 0.14  | 4.76E-01 |
| LCE3C         | 0.23  | 2.32E-01 | 0.14  | 4.76E-01 |
| LRRC75A       | 0.10  | 6.11E-01 | -0.14 | 4.76E-01 |
| LYRM2         | 0.14  | 4.79E-01 | 0.14  | 4.76E-01 |
| MLH3          | 0.16  | 4.26E-01 | 0.14  | 4.76E-01 |
| MLX           | 0.25  | 1.96E-01 | 0.14  | 4.76E-01 |
| OFD1P17       | -0.18 | 3.46E-01 | -0.14 | 4.76E-01 |
| PPIAP30       | -0.08 | 7.00E-01 | -0.14 | 4.76E-01 |

|               |       |          |       |          |
|---------------|-------|----------|-------|----------|
| PURA          | -0.14 | 4.87E-01 | -0.14 | 4.76E-01 |
| RP11-196B3.3  | 0.03  | 8.77E-01 | -0.14 | 4.76E-01 |
| RP11-346D14.1 | -0.40 | 3.39E-02 | -0.14 | 4.76E-01 |
| RP11-448G15.3 | -0.01 | 9.69E-01 | -0.14 | 4.76E-01 |
| RP11-461L13.5 | -0.07 | 7.24E-01 | 0.14  | 4.76E-01 |
| RP11-4B16.4   | -0.01 | 9.78E-01 | 0.14  | 4.76E-01 |
| RP11-736K20.5 | -0.33 | 9.12E-02 | -0.14 | 4.76E-01 |
| RP11-824M15.3 | -0.05 | 7.94E-01 | -0.14 | 4.76E-01 |
| RP5-968J1.1   | 0.12  | 5.48E-01 | 0.14  | 4.76E-01 |
| RPL7P18       | 0.25  | 2.08E-01 | 0.14  | 4.76E-01 |
| RPL7P26       | -0.16 | 4.14E-01 | 0.14  | 4.76E-01 |
| STPG2         | -0.17 | 3.75E-01 | 0.14  | 4.76E-01 |
| TBCK          | -0.04 | 8.57E-01 | -0.14 | 4.76E-01 |
| TLR6          | 0.04  | 8.40E-01 | 0.14  | 4.76E-01 |
| TNNI1         | 0.09  | 6.36E-01 | 0.14  | 4.76E-01 |
| VPS37D        | 0.14  | 4.88E-01 | 0.14  | 4.76E-01 |
| AC008065.1    | 0.12  | 5.28E-01 | -0.14 | 4.77E-01 |
| ACVR2A        | 0.29  | 1.33E-01 | -0.14 | 4.77E-01 |
| BNIPL         | -0.07 | 7.20E-01 | 0.14  | 4.77E-01 |
| C9orf139      | -0.03 | 8.83E-01 | 0.14  | 4.77E-01 |
| CECR5         | 0.04  | 8.57E-01 | 0.14  | 4.77E-01 |
| CEP85         | 0.04  | 8.28E-01 | -0.14 | 4.77E-01 |
| CNIH3         | -0.08 | 7.00E-01 | 0.14  | 4.77E-01 |
| CTB-134H23.2  | 0.13  | 5.09E-01 | 0.14  | 4.77E-01 |
| CYB5R4        | 0.08  | 6.99E-01 | 0.14  | 4.77E-01 |
| EFHB          | 0.27  | 1.61E-01 | 0.14  | 4.77E-01 |
| EIF4HP2       | -0.19 | 3.26E-01 | -0.14 | 4.77E-01 |
| G31401        | -0.30 | 1.25E-01 | -0.14 | 4.77E-01 |
| MIR3193       | 0.18  | 3.69E-01 | 0.14  | 4.77E-01 |
| NUDT5         | 0.16  | 4.04E-01 | 0.14  | 4.77E-01 |
| PAPOLB        | -0.20 | 3.01E-01 | 0.14  | 4.77E-01 |
| PPM1B         | 0.10  | 6.22E-01 | -0.14 | 4.77E-01 |
| RDH12         | 0.42  | 2.56E-02 | 0.14  | 4.77E-01 |
| RNF19A        | -0.12 | 5.35E-01 | 0.14  | 4.77E-01 |
| RP11-196G11.2 | -0.01 | 9.56E-01 | -0.14 | 4.77E-01 |
| RP11-30K9.1   | -0.17 | 3.74E-01 | -0.14 | 4.77E-01 |
| RP11-342K6.3  | 0.00  | 9.90E-01 | -0.14 | 4.77E-01 |
| RP11-44F14.1  | 0.00  | 9.87E-01 | -0.14 | 4.77E-01 |
| RP11-632K20.7 | -0.02 | 9.23E-01 | -0.14 | 4.77E-01 |
| SAMD1         | 0.33  | 8.34E-02 | 0.14  | 4.77E-01 |
| SCARNA21      | 0.12  | 5.43E-01 | 0.14  | 4.77E-01 |
| TBC1D19       | -0.35 | 6.50E-02 | -0.14 | 4.77E-01 |
| TMEM53        | -0.01 | 9.45E-01 | 0.14  | 4.77E-01 |
| TTN-AS1       | 0.08  | 6.87E-01 | -0.14 | 4.77E-01 |
| UBL4A         | -0.04 | 8.43E-01 | 0.14  | 4.77E-01 |
| UTP15         | 0.02  | 9.33E-01 | -0.14 | 4.77E-01 |
| VMAC          | -0.03 | 8.98E-01 | 0.14  | 4.77E-01 |

|                       |       |          |       |          |
|-----------------------|-------|----------|-------|----------|
| <b>ALOX12P2</b>       | -0.05 | 7.92E-01 | -0.14 | 4.78E-01 |
| <b>ANKRD37</b>        | -0.05 | 8.14E-01 | -0.14 | 4.78E-01 |
| <b>ASAP1</b>          | 0.04  | 8.53E-01 | 0.14  | 4.78E-01 |
| <b>CCL8</b>           | 0.16  | 4.02E-01 | 0.14  | 4.78E-01 |
| <b>CD14</b>           | 0.08  | 6.92E-01 | 0.14  | 4.78E-01 |
| <b>CNOT2</b>          | 0.01  | 9.74E-01 | -0.14 | 4.78E-01 |
| <b>COQ2</b>           | 0.01  | 9.76E-01 | -0.14 | 4.78E-01 |
| <b>CPA5</b>           | -0.08 | 6.73E-01 | 0.14  | 4.78E-01 |
| <b>CTD-2215L10.1</b>  | 0.23  | 2.41E-01 | 0.14  | 4.78E-01 |
| <b>HS6ST1</b>         | 0.23  | 2.44E-01 | 0.14  | 4.78E-01 |
| <b>KIF25</b>          | 0.04  | 8.57E-01 | 0.14  | 4.78E-01 |
| <b>LMBR1L</b>         | 0.15  | 4.55E-01 | 0.14  | 4.78E-01 |
| <b>POLI</b>           | -0.04 | 8.52E-01 | -0.14 | 4.78E-01 |
| <b>RN7SL364P</b>      | -0.16 | 4.14E-01 | 0.14  | 4.78E-01 |
| <b>RN7SL67P</b>       | -0.27 | 1.66E-01 | 0.14  | 4.78E-01 |
| <b>RP11-293A21.2</b>  | 0.03  | 8.78E-01 | 0.14  | 4.78E-01 |
| <b>RP11-361H10.3</b>  | 0.19  | 3.35E-01 | -0.14 | 4.78E-01 |
| <b>RP11-415J8.7</b>   | 0.08  | 6.76E-01 | 0.14  | 4.78E-01 |
| <b>RP11-464D20.2</b>  | 0.08  | 6.87E-01 | 0.14  | 4.78E-01 |
| <b>RP11-502M1.2</b>   | -0.09 | 6.62E-01 | 0.14  | 4.78E-01 |
| <b>RP11-52J3.3</b>    | 0.10  | 6.22E-01 | -0.14 | 4.78E-01 |
| <b>RP11-544A12.8</b>  | -0.07 | 7.39E-01 | -0.14 | 4.78E-01 |
| <b>RP11-655M14.13</b> | -0.13 | 5.21E-01 | -0.14 | 4.78E-01 |
| <b>RP4-803J11.2</b>   | 0.05  | 7.95E-01 | -0.14 | 4.78E-01 |
| <b>RP5-979D14.1</b>   | -0.09 | 6.65E-01 | 0.14  | 4.78E-01 |
| <b>RPL3P2</b>         | -0.41 | 2.88E-02 | 0.14  | 4.78E-01 |
| <b>SCML2</b>          | 0.16  | 4.05E-01 | -0.14 | 4.78E-01 |
| <b>SECISBP2L</b>      | 0.22  | 2.70E-01 | -0.14 | 4.78E-01 |
| <b>SETD6</b>          | -0.11 | 5.60E-01 | 0.14  | 4.78E-01 |
| <b>SLC22A4</b>        | 0.20  | 2.97E-01 | -0.14 | 4.78E-01 |
| <b>SPEG</b>           | 0.04  | 8.28E-01 | 0.14  | 4.78E-01 |
| <b>XKR4</b>           | -0.42 | 2.74E-02 | -0.14 | 4.78E-01 |
| <b>AC015849.16</b>    | 0.00  | 9.97E-01 | 0.14  | 4.79E-01 |
| <b>AC020550.7</b>     | 0.46  | 1.47E-02 | -0.14 | 4.79E-01 |
| <b>AC115522.3</b>     | 0.10  | 6.19E-01 | 0.14  | 4.79E-01 |
| <b>AC140061.12</b>    | -0.05 | 7.91E-01 | 0.14  | 4.79E-01 |
| <b>AGAP6</b>          | -0.22 | 2.67E-01 | -0.14 | 4.79E-01 |
| <b>ARL6IP5</b>        | -0.05 | 7.92E-01 | -0.14 | 4.79E-01 |
| <b>C15orf57</b>       | 0.12  | 5.43E-01 | 0.14  | 4.79E-01 |
| <b>CTD-2583P5.1</b>   | 0.01  | 9.54E-01 | 0.14  | 4.79E-01 |
| <b>DCLK3</b>          | -0.27 | 1.69E-01 | 0.14  | 4.79E-01 |
| <b>DGKZP1</b>         | 0.06  | 7.58E-01 | 0.14  | 4.79E-01 |
| <b>FXR2</b>           | 0.14  | 4.73E-01 | -0.14 | 4.79E-01 |
| <b>G2592</b>          | 0.01  | 9.63E-01 | -0.14 | 4.79E-01 |
| <b>G42437</b>         | -0.04 | 8.24E-01 | -0.14 | 4.79E-01 |
| <b>KCTD15</b>         | 0.11  | 5.75E-01 | 0.14  | 4.79E-01 |
| <b>KRT8P38</b>        | 0.12  | 5.44E-01 | -0.14 | 4.79E-01 |



|               |       |          |       |          |
|---------------|-------|----------|-------|----------|
| MIF           | -0.53 | 3.57E-03 | 0.14  | 4.79E-01 |
| MIR3138       | -0.05 | 8.16E-01 | 0.14  | 4.79E-01 |
| PARPBP        | 0.11  | 5.85E-01 | -0.14 | 4.79E-01 |
| PSMD2         | 0.05  | 7.87E-01 | 0.14  | 4.79E-01 |
| PTPN14        | -0.09 | 6.46E-01 | -0.14 | 4.79E-01 |
| RP11-112J1.1  | -0.10 | 6.14E-01 | 0.14  | 4.79E-01 |
| RP11-166O4.6  | 0.01  | 9.67E-01 | -0.14 | 4.79E-01 |
| RP11-320N21.1 | 0.16  | 4.09E-01 | -0.14 | 4.79E-01 |
| RP11-324F21.1 | -0.03 | 8.81E-01 | -0.14 | 4.79E-01 |
| RP11-60C6.8   | -0.01 | 9.40E-01 | 0.14  | 4.79E-01 |
| SF3A1         | -0.21 | 2.76E-01 | 0.14  | 4.79E-01 |
| SLC20A2       | 0.07  | 7.32E-01 | -0.14 | 4.79E-01 |
| SUGT1P3       | 0.04  | 8.38E-01 | -0.14 | 4.79E-01 |
| TSPAN4        | -0.07 | 7.05E-01 | 0.14  | 4.79E-01 |
| XLOC_010005   | -0.14 | 4.66E-01 | 0.14  | 4.79E-01 |
| XLOC_011005   | -0.21 | 2.76E-01 | -0.14 | 4.79E-01 |
| ZBTB47        | 0.07  | 7.15E-01 | 0.14  | 4.79E-01 |
| AC004257.1    | -0.26 | 1.76E-01 | 0.14  | 4.80E-01 |
| ACOT13        | 0.25  | 2.09E-01 | 0.14  | 4.80E-01 |
| C1orf21       | -0.23 | 2.31E-01 | -0.14 | 4.80E-01 |
| C1orf61       | 0.28  | 1.44E-01 | 0.14  | 4.80E-01 |
| CTB-55O6.10   | -0.25 | 1.93E-01 | -0.14 | 4.80E-01 |
| DPCD          | -0.08 | 6.96E-01 | 0.14  | 4.80E-01 |
| E2F1          | -0.13 | 5.23E-01 | -0.14 | 4.80E-01 |
| EBAG9P1       | -0.18 | 3.49E-01 | -0.14 | 4.80E-01 |
| EEF1A1P12     | 0.23  | 2.37E-01 | 0.14  | 4.80E-01 |
| EIF4E3        | -0.44 | 2.03E-02 | -0.14 | 4.80E-01 |
| FRS3          | -0.14 | 4.74E-01 | 0.14  | 4.80E-01 |
| GABRG3        | -0.12 | 5.50E-01 | 0.14  | 4.80E-01 |
| GS1-24F4.2    | 0.04  | 8.50E-01 | -0.14 | 4.80E-01 |
| HAP1          | 0.07  | 7.25E-01 | -0.14 | 4.80E-01 |
| IMPDH1        | 0.00  | 9.89E-01 | 0.14  | 4.80E-01 |
| KIF19         | -0.04 | 8.36E-01 | -0.14 | 4.80E-01 |
| LINC00342     | -0.31 | 1.09E-01 | -0.14 | 4.80E-01 |
| MGAM2         | -0.14 | 4.86E-01 | -0.14 | 4.80E-01 |
| NR2F6         | 0.06  | 7.70E-01 | 0.14  | 4.80E-01 |
| PAK6          | 0.34  | 7.32E-02 | 0.14  | 4.80E-01 |
| PHYHD1        | -0.23 | 2.50E-01 | -0.14 | 4.80E-01 |
| PLAC4         | -0.31 | 1.14E-01 | -0.14 | 4.80E-01 |
| PNO1          | 0.15  | 4.36E-01 | -0.14 | 4.80E-01 |
| RAMP2-AS1     | 0.11  | 5.65E-01 | -0.14 | 4.80E-01 |
| RNU6-1215P    | 0.01  | 9.59E-01 | -0.14 | 4.80E-01 |
| ROBO3         | -0.17 | 3.93E-01 | -0.14 | 4.80E-01 |
| RP11-214O1.2  | 0.00  | 9.85E-01 | 0.14  | 4.80E-01 |
| RP11-262A16.1 | 0.24  | 2.25E-01 | 0.14  | 4.80E-01 |
| RP11-269G24.4 | -0.29 | 1.41E-01 | -0.14 | 4.80E-01 |
| RP11-731D1.3  | -0.03 | 8.92E-01 | 0.14  | 4.80E-01 |

|               |       |          |       |          |
|---------------|-------|----------|-------|----------|
| RP11-776H12.1 | 0.08  | 6.95E-01 | 0.14  | 4.80E-01 |
| RP11-800A18.4 | 0.15  | 4.54E-01 | -0.14 | 4.80E-01 |
| XLOC_001907   | -0.10 | 6.22E-01 | -0.14 | 4.80E-01 |
| ZFP64         | -0.10 | 6.14E-01 | 0.14  | 4.80E-01 |
| ZNF30         | 0.08  | 6.69E-01 | -0.14 | 4.80E-01 |
| AL353671.4    | 0.30  | 1.18E-01 | -0.14 | 4.81E-01 |
| CDRT1         | 0.02  | 9.15E-01 | -0.14 | 4.81E-01 |
| FAM212B       | 0.49  | 7.79E-03 | -0.14 | 4.81E-01 |
| G13446        | 0.01  | 9.59E-01 | -0.14 | 4.81E-01 |
| G9105         | 0.18  | 3.49E-01 | 0.14  | 4.81E-01 |
| GALR2         | 0.18  | 3.55E-01 | 0.14  | 4.81E-01 |
| HLA-L         | 0.10  | 5.98E-01 | 0.14  | 4.81E-01 |
| HSPB3         | -0.14 | 4.81E-01 | 0.14  | 4.81E-01 |
| IPO4          | 0.12  | 5.27E-01 | -0.14 | 4.81E-01 |
| LRR8A         | 0.25  | 1.98E-01 | 0.14  | 4.81E-01 |
| MAMDC4        | -0.22 | 2.54E-01 | -0.14 | 4.81E-01 |
| MTCYBP18      | 0.05  | 8.01E-01 | -0.14 | 4.81E-01 |
| RNF170        | 0.22  | 2.66E-01 | 0.14  | 4.81E-01 |
| RNU6-1127P    | -0.19 | 3.31E-01 | 0.14  | 4.81E-01 |
| RNU6-377P     | 0.03  | 8.63E-01 | -0.14 | 4.81E-01 |
| RP11-333J10.3 | -0.06 | 7.64E-01 | -0.14 | 4.81E-01 |
| RP11-428J1.4  | 0.00  | 9.85E-01 | 0.14  | 4.81E-01 |
| RP4-639F20.1  | -0.02 | 9.24E-01 | -0.14 | 4.81E-01 |
| TBCAP3        | 0.01  | 9.78E-01 | 0.14  | 4.81E-01 |
| UBQLN1        | 0.07  | 7.35E-01 | -0.14 | 4.81E-01 |
| ZKSCAN7       | 0.08  | 6.88E-01 | 0.14  | 4.81E-01 |
| AC009303.3    | -0.12 | 5.31E-01 | 0.14  | 4.82E-01 |
| ACAN          | 0.15  | 4.60E-01 | 0.14  | 4.82E-01 |
| BAX           | 0.23  | 2.41E-01 | 0.14  | 4.82E-01 |
| C11orf94      | 0.17  | 4.01E-01 | -0.14 | 4.82E-01 |
| CRYGS         | -0.11 | 5.87E-01 | -0.14 | 4.82E-01 |
| CTD-2313J17.1 | -0.08 | 6.72E-01 | 0.14  | 4.82E-01 |
| DDX6          | 0.05  | 7.98E-01 | 0.14  | 4.82E-01 |
| EPHA3         | -0.24 | 2.18E-01 | 0.14  | 4.82E-01 |
| FBXO38        | -0.04 | 8.25E-01 | -0.14 | 4.82E-01 |
| G32334        | -0.09 | 6.56E-01 | -0.14 | 4.82E-01 |
| GUCY2D        | -0.32 | 9.81E-02 | 0.14  | 4.82E-01 |
| KLHDC3        | 0.02  | 9.29E-01 | 0.14  | 4.82E-01 |
| MTG1          | -0.02 | 9.31E-01 | 0.14  | 4.82E-01 |
| NDRG2         | 0.33  | 8.29E-02 | 0.14  | 4.82E-01 |
| NIP7          | 0.19  | 3.22E-01 | -0.14 | 4.82E-01 |
| NR2E1         | -0.14 | 4.86E-01 | 0.14  | 4.82E-01 |
| PROX1         | 0.20  | 3.09E-01 | 0.14  | 4.82E-01 |
| RAD52         | -0.08 | 6.72E-01 | 0.14  | 4.82E-01 |
| RP11-255H23.5 | -0.26 | 1.74E-01 | -0.14 | 4.82E-01 |
| RP11-259O2.3  | -0.14 | 4.93E-01 | -0.14 | 4.82E-01 |
| RP11-517C16.2 | -0.17 | 4.01E-01 | 0.14  | 4.82E-01 |

|               |       |          |       |          |
|---------------|-------|----------|-------|----------|
| THBS4         | 0.08  | 6.76E-01 | 0.14  | 4.82E-01 |
| TMEM92        | 0.38  | 4.74E-02 | 0.14  | 4.82E-01 |
| ZEB2-AS1      | -0.40 | 3.45E-02 | -0.14 | 4.82E-01 |
| ATP5D         | 0.17  | 3.73E-01 | 0.14  | 4.83E-01 |
| CEBPZOS       | -0.05 | 7.88E-01 | 0.14  | 4.83E-01 |
| ETFDH         | 0.01  | 9.40E-01 | 0.14  | 4.83E-01 |
| KLK7          | 0.10  | 6.08E-01 | 0.14  | 4.83E-01 |
| NDUFC1        | 0.13  | 5.09E-01 | 0.14  | 4.83E-01 |
| PYM1          | 0.32  | 9.33E-02 | 0.14  | 4.83E-01 |
| RP11-526D8.11 | -0.11 | 5.89E-01 | 0.14  | 4.83E-01 |
| RP11-540O11.6 | 0.01  | 9.65E-01 | 0.14  | 4.83E-01 |
| RP11-867G23.8 | 0.15  | 4.59E-01 | 0.14  | 4.83E-01 |
| RPL7P19       | -0.11 | 5.82E-01 | 0.14  | 4.83E-01 |
| TGM3          | 0.27  | 1.62E-01 | 0.14  | 4.83E-01 |
| TRBV5-1       | 0.07  | 7.06E-01 | 0.14  | 4.83E-01 |
| XLOC_002840   | -0.22 | 2.71E-01 | 0.14  | 4.83E-01 |
| XLOC_004122   | 0.04  | 8.32E-01 | 0.14  | 4.83E-01 |
| AC004851.1    | -0.11 | 5.84E-01 | -0.14 | 4.83E-01 |
| AC072062.3    | 0.01  | 9.44E-01 | -0.14 | 4.83E-01 |
| CES4A         | -0.25 | 1.92E-01 | -0.14 | 4.83E-01 |
| ESF1          | -0.04 | 8.38E-01 | -0.14 | 4.83E-01 |
| KB-1410C5.3   | 0.23  | 2.42E-01 | -0.14 | 4.83E-01 |
| LFNG          | 0.34  | 7.61E-02 | -0.14 | 4.83E-01 |
| PPA1          | 0.01  | 9.65E-01 | -0.14 | 4.83E-01 |
| RP11-329B9.4  | -0.14 | 4.71E-01 | -0.14 | 4.83E-01 |
| RPS4X         | -0.19 | 3.29E-01 | -0.14 | 4.83E-01 |
| THCAT158      | 0.04  | 8.32E-01 | -0.14 | 4.83E-01 |
| TMEM136       | -0.24 | 2.23E-01 | -0.14 | 4.83E-01 |
| TMEM27        | 0.12  | 5.32E-01 | -0.14 | 4.83E-01 |
| AL441988.1    | -0.07 | 7.09E-01 | -0.14 | 4.84E-01 |
| BUD13P1       | 0.01  | 9.46E-01 | -0.14 | 4.84E-01 |
| CDS2          | -0.11 | 5.82E-01 | -0.14 | 4.84E-01 |
| CTD-2194D22.3 | -0.09 | 6.42E-01 | -0.14 | 4.84E-01 |
| G13124        | 0.28  | 1.53E-01 | -0.14 | 4.84E-01 |
| GSR           | 0.24  | 2.15E-01 | -0.14 | 4.84E-01 |
| MIR374B       | 0.31  | 1.03E-01 | -0.14 | 4.84E-01 |
| PRELID1P4     | -0.23 | 2.47E-01 | -0.14 | 4.84E-01 |
| PSMG2         | 0.11  | 5.88E-01 | -0.14 | 4.84E-01 |
| RP1-7G5.6     | -0.28 | 1.56E-01 | -0.14 | 4.84E-01 |
| RP11-51B23.3  | 0.03  | 8.61E-01 | -0.14 | 4.84E-01 |
| RP11-702L15.4 | 0.16  | 4.03E-01 | -0.14 | 4.84E-01 |
| RP3-425C14.5  | -0.03 | 8.87E-01 | -0.14 | 4.84E-01 |
| SUSD4         | 0.23  | 2.47E-01 | -0.14 | 4.84E-01 |
| TBC1D4        | 0.01  | 9.63E-01 | -0.14 | 4.84E-01 |
| AC016738.3    | -0.15 | 4.53E-01 | 0.14  | 4.84E-01 |
| ARSF          | 0.17  | 3.91E-01 | 0.14  | 4.84E-01 |
| CMTM3         | -0.02 | 9.36E-01 | 0.14  | 4.84E-01 |

|               |       |          |       |          |
|---------------|-------|----------|-------|----------|
| DCAF6         | 0.26  | 1.90E-01 | 0.14  | 4.84E-01 |
| DNAH5         | 0.14  | 4.88E-01 | 0.14  | 4.84E-01 |
| DNPEP         | 0.11  | 5.63E-01 | 0.14  | 4.84E-01 |
| EGLN1         | 0.22  | 2.50E-01 | 0.14  | 4.84E-01 |
| FUS           | -0.22 | 2.67E-01 | 0.14  | 4.84E-01 |
| GPRIN1        | -0.09 | 6.35E-01 | 0.14  | 4.84E-01 |
| IFIT5         | 0.32  | 1.02E-01 | 0.14  | 4.84E-01 |
| MCOLN2        | 0.06  | 7.50E-01 | 0.14  | 4.84E-01 |
| OCIAD2        | 0.03  | 8.75E-01 | 0.14  | 4.84E-01 |
| RNA5SP179     | -0.16 | 4.06E-01 | 0.14  | 4.84E-01 |
| RNF43         | -0.08 | 6.90E-01 | 0.14  | 4.84E-01 |
| RP1-302G2.5   | 0.10  | 6.01E-01 | 0.14  | 4.84E-01 |
| RP11-556H2.3  | 0.15  | 4.56E-01 | 0.14  | 4.84E-01 |
| RP11-890B15.2 | 0.17  | 3.99E-01 | 0.14  | 4.84E-01 |
| TRAPPC12      | -0.04 | 8.42E-01 | 0.14  | 4.84E-01 |
| XLOC_007955   | -0.17 | 3.73E-01 | 0.14  | 4.84E-01 |
| AC137932.6    | -0.01 | 9.47E-01 | -0.14 | 4.85E-01 |
| AVPR2         | -0.35 | 6.50E-02 | 0.14  | 4.85E-01 |
| CTB-37A13.1   | 0.12  | 5.38E-01 | 0.14  | 4.85E-01 |
| DSCAML1       | 0.23  | 2.43E-01 | 0.14  | 4.85E-01 |
| G16904        | -0.11 | 5.94E-01 | -0.14 | 4.85E-01 |
| GABARAP       | -0.13 | 5.19E-01 | 0.14  | 4.85E-01 |
| GJB3          | -0.13 | 4.99E-01 | -0.14 | 4.85E-01 |
| GVQW2         | -0.15 | 4.38E-01 | -0.14 | 4.85E-01 |
| HTATIP2       | 0.06  | 7.52E-01 | 0.14  | 4.85E-01 |
| KB-1410C5.2   | -0.02 | 9.04E-01 | -0.14 | 4.85E-01 |
| KB-1907C4.2   | -0.03 | 8.93E-01 | 0.14  | 4.85E-01 |
| LINC00202-1   | 0.09  | 6.63E-01 | -0.14 | 4.85E-01 |
| LYN           | 0.20  | 2.98E-01 | 0.14  | 4.85E-01 |
| MRPL50        | 0.11  | 5.68E-01 | -0.14 | 4.85E-01 |
| NPM2          | -0.04 | 8.51E-01 | 0.14  | 4.85E-01 |
| PHBP7         | -0.04 | 8.27E-01 | -0.14 | 4.85E-01 |
| PRKAR1A       | 0.24  | 2.11E-01 | -0.14 | 4.85E-01 |
| PTPN1         | 0.31  | 1.10E-01 | -0.14 | 4.85E-01 |
| RAB6B         | -0.14 | 4.63E-01 | 0.14  | 4.85E-01 |
| RN7SKP296     | -0.01 | 9.61E-01 | -0.14 | 4.85E-01 |
| RNU4-24P      | 0.30  | 1.19E-01 | -0.14 | 4.85E-01 |
| RNU6-571P     | 0.11  | 5.78E-01 | -0.14 | 4.85E-01 |
| RNU7-107P     | -0.38 | 4.39E-02 | 0.14  | 4.85E-01 |
| RNU7-41P      | -0.03 | 8.97E-01 | -0.14 | 4.85E-01 |
| RP1-102E24.10 | -0.38 | 4.64E-02 | 0.14  | 4.85E-01 |
| RP11-523O18.5 | -0.34 | 7.46E-02 | 0.14  | 4.85E-01 |
| RP11-707G14.8 | -0.04 | 8.38E-01 | -0.14 | 4.85E-01 |
| RP11-745A24.1 | -0.09 | 6.45E-01 | -0.14 | 4.85E-01 |
| RP4-635A23.3  | -0.16 | 4.27E-01 | 0.14  | 4.85E-01 |
| RP4-765C7.2   | -0.26 | 1.78E-01 | -0.14 | 4.85E-01 |
| RSAD2         | 0.34  | 7.95E-02 | 0.14  | 4.85E-01 |

|               |       |          |       |          |
|---------------|-------|----------|-------|----------|
| SARDH         | 0.05  | 8.14E-01 | 0.14  | 4.85E-01 |
| SELO          | 0.05  | 8.05E-01 | 0.14  | 4.85E-01 |
| STAU2         | 0.24  | 2.15E-01 | 0.14  | 4.85E-01 |
| TMEM80        | -0.42 | 2.62E-02 | -0.14 | 4.85E-01 |
| TUBGCP5       | 0.20  | 3.16E-01 | 0.14  | 4.85E-01 |
| ZNF57         | -0.26 | 1.75E-01 | -0.14 | 4.85E-01 |
| FBXO44        | -0.02 | 9.16E-01 | 0.14  | 4.86E-01 |
| MAN1A1        | -0.03 | 8.77E-01 | 0.14  | 4.86E-01 |
| MAT2A         | -0.02 | 9.08E-01 | 0.14  | 4.86E-01 |
| PHTF1         | -0.22 | 2.63E-01 | 0.14  | 4.86E-01 |
| RP11-214F16.8 | -0.12 | 5.30E-01 | 0.14  | 4.86E-01 |
| RP11-43N5.1   | -0.23 | 2.35E-01 | 0.14  | 4.86E-01 |
| SMPD1         | 0.25  | 1.95E-01 | 0.14  | 4.86E-01 |
| TRAPPC1       | 0.12  | 5.52E-01 | 0.14  | 4.86E-01 |
| AC093616.4    | -0.36 | 5.80E-02 | -0.14 | 4.86E-01 |
| CCBE1         | -0.32 | 9.96E-02 | -0.14 | 4.86E-01 |
| CSRNP2        | 0.02  | 9.00E-01 | -0.14 | 4.86E-01 |
| CTD-2553L13.7 | -0.08 | 6.91E-01 | -0.14 | 4.86E-01 |
| CWC15         | -0.05 | 8.02E-01 | -0.14 | 4.86E-01 |
| FAM35CP       | -0.35 | 6.87E-02 | -0.14 | 4.86E-01 |
| FKBP1C        | 0.07  | 7.21E-01 | -0.14 | 4.86E-01 |
| G40303        | 0.13  | 5.14E-01 | -0.14 | 4.86E-01 |
| HSPE1P18      | -0.04 | 8.43E-01 | -0.14 | 4.86E-01 |
| KDM7A         | 0.30  | 1.20E-01 | -0.14 | 4.86E-01 |
| LYRM7         | -0.10 | 6.04E-01 | -0.14 | 4.86E-01 |
| RP11-123O10.4 | 0.00  | 9.83E-01 | -0.14 | 4.86E-01 |
| RP11-346E8.1  | -0.12 | 5.45E-01 | -0.14 | 4.86E-01 |
| RP11-396F22.1 | -0.37 | 5.03E-02 | -0.14 | 4.86E-01 |
| RP6-74O6.6    | -0.17 | 4.01E-01 | -0.14 | 4.86E-01 |
| SDHAP3        | 0.09  | 6.50E-01 | -0.14 | 4.86E-01 |
| SMIM4         | 0.06  | 7.67E-01 | -0.14 | 4.86E-01 |
| ALKBH7        | 0.02  | 9.36E-01 | 0.14  | 4.86E-01 |
| C14orf93      | 0.11  | 5.76E-01 | 0.14  | 4.86E-01 |
| CXCL10        | 0.14  | 4.73E-01 | 0.14  | 4.86E-01 |
| ESPNL         | 0.55  | 2.37E-03 | 0.14  | 4.86E-01 |
| G37296        | 0.16  | 4.10E-01 | 0.14  | 4.86E-01 |
| HOXA11-AS     | -0.14 | 4.89E-01 | 0.14  | 4.86E-01 |
| MMP10         | 0.10  | 6.08E-01 | 0.14  | 4.86E-01 |
| OR7E126P      | -0.26 | 1.88E-01 | 0.14  | 4.86E-01 |
| RN7SL263P     | -0.12 | 5.31E-01 | 0.14  | 4.86E-01 |
| SERTAD4-AS1   | -0.20 | 3.00E-01 | 0.14  | 4.86E-01 |
| SSSCA1-AS1    | 0.41  | 3.14E-02 | 0.14  | 4.86E-01 |
| TMEM44        | 0.05  | 8.03E-01 | 0.14  | 4.86E-01 |
| XLOC_013124   | 0.30  | 1.25E-01 | 0.14  | 4.86E-01 |
| ALG9          | -0.03 | 8.80E-01 | -0.14 | 4.86E-01 |
| BNC2          | 0.17  | 3.73E-01 | -0.14 | 4.86E-01 |
| CA6           | 0.05  | 8.13E-01 | -0.14 | 4.86E-01 |

|                       |       |          |       |          |
|-----------------------|-------|----------|-------|----------|
| <b>FBLN7</b>          | -0.24 | 2.23E-01 | -0.14 | 4.86E-01 |
| <b>G3630</b>          | -0.12 | 5.53E-01 | -0.14 | 4.86E-01 |
| <b>HNRNPLP1</b>       | -0.35 | 7.15E-02 | -0.14 | 4.86E-01 |
| <b>MINCR</b>          | -0.04 | 8.23E-01 | -0.14 | 4.86E-01 |
| <b>MIR3682</b>        | -0.10 | 6.28E-01 | -0.14 | 4.86E-01 |
| <b>N4BP2L2-IT2</b>    | -0.22 | 2.59E-01 | -0.14 | 4.86E-01 |
| <b>PCBP3-OT1</b>      | 0.27  | 1.59E-01 | -0.14 | 4.86E-01 |
| <b>RN7SL412P</b>      | 0.00  | 9.85E-01 | -0.14 | 4.86E-01 |
| <b>RN7SL543P</b>      | -0.31 | 1.04E-01 | -0.14 | 4.86E-01 |
| <b>RP11-20B24.6</b>   | -0.40 | 3.55E-02 | -0.14 | 4.86E-01 |
| <b>RP11-467L19.14</b> | -0.17 | 3.78E-01 | -0.14 | 4.86E-01 |
| <b>RP11-501J20.5</b>  | -0.30 | 1.18E-01 | -0.14 | 4.86E-01 |
| <b>RP4-742J24.2</b>   | 0.07  | 7.24E-01 | -0.14 | 4.86E-01 |
| <b>SCLT1</b>          | 0.04  | 8.55E-01 | -0.14 | 4.86E-01 |
| <b>SLK</b>            | -0.05 | 7.83E-01 | -0.14 | 4.86E-01 |
| <b>SRSF2</b>          | 0.18  | 3.71E-01 | -0.14 | 4.86E-01 |
| <b>ZNF485</b>         | 0.18  | 3.62E-01 | -0.14 | 4.86E-01 |
| <b>AC091153.4</b>     | -0.32 | 9.47E-02 | 0.14  | 4.87E-01 |
| <b>ASB1</b>           | 0.09  | 6.55E-01 | -0.14 | 4.87E-01 |
| <b>BCL2L12</b>        | 0.07  | 7.11E-01 | 0.14  | 4.87E-01 |
| <b>DCDC2</b>          | 0.01  | 9.53E-01 | 0.14  | 4.87E-01 |
| <b>H6PD</b>           | 0.20  | 2.98E-01 | 0.14  | 4.87E-01 |
| <b>MIB1</b>           | 0.00  | 9.98E-01 | -0.14 | 4.87E-01 |
| <b>MIR3145</b>        | 0.24  | 2.15E-01 | -0.14 | 4.87E-01 |
| <b>NPEPPS</b>         | -0.08 | 6.81E-01 | 0.14  | 4.87E-01 |
| <b>PRKAB2</b>         | -0.19 | 3.29E-01 | -0.14 | 4.87E-01 |
| <b>PUS1</b>           | 0.15  | 4.33E-01 | 0.14  | 4.87E-01 |
| <b>RERG-AS1</b>       | -0.23 | 2.33E-01 | -0.14 | 4.87E-01 |
| <b>RN7SL615P</b>      | 0.28  | 1.49E-01 | 0.14  | 4.87E-01 |
| <b>RP11-212I21.4</b>  | -0.04 | 8.46E-01 | -0.14 | 4.87E-01 |
| <b>RP11-438F14.10</b> | 0.01  | 9.66E-01 | -0.14 | 4.87E-01 |
| <b>RP11-535A19.1</b>  | 0.07  | 7.11E-01 | -0.14 | 4.87E-01 |
| <b>RP11-661A12.9</b>  | -0.23 | 2.34E-01 | -0.14 | 4.87E-01 |
| <b>RP4-800G7.2</b>    | 0.12  | 5.57E-01 | -0.14 | 4.87E-01 |
| <b>RP5-1021I20.2</b>  | -0.22 | 2.52E-01 | -0.14 | 4.87E-01 |
| <b>SUMO2P16</b>       | -0.18 | 3.48E-01 | -0.14 | 4.87E-01 |
| <b>ZC3H18</b>         | -0.05 | 8.14E-01 | 0.14  | 4.87E-01 |
| <b>ZFP91</b>          | 0.15  | 4.50E-01 | -0.14 | 4.87E-01 |
| <b>AC017074.2</b>     | 0.09  | 6.67E-01 | -0.14 | 4.88E-01 |
| <b>AFG3L1P</b>        | -0.20 | 3.05E-01 | -0.14 | 4.88E-01 |
| <b>ANKRD20A14P</b>    | 0.26  | 1.76E-01 | -0.14 | 4.88E-01 |
| <b>FAM90A25P</b>      | -0.02 | 9.00E-01 | -0.14 | 4.88E-01 |
| <b>FTH1P25</b>        | -0.09 | 6.39E-01 | -0.14 | 4.88E-01 |
| <b>GNB5</b>           | 0.18  | 3.72E-01 | 0.14  | 4.88E-01 |
| <b>HNRNPA0</b>        | 0.34  | 8.13E-02 | 0.14  | 4.88E-01 |
| <b>ING1</b>           | -0.10 | 5.96E-01 | -0.14 | 4.88E-01 |
| <b>MYRIP</b>          | -0.36 | 6.33E-02 | 0.14  | 4.88E-01 |

|                        |       |          |       |          |
|------------------------|-------|----------|-------|----------|
| <b>RP1-80N2.4</b>      | -0.18 | 3.68E-01 | -0.14 | 4.88E-01 |
| <b>RP11-151A6.4</b>    | -0.13 | 5.15E-01 | 0.14  | 4.88E-01 |
| <b>RP11-164P12.5</b>   | 0.14  | 4.69E-01 | 0.14  | 4.88E-01 |
| <b>RP11-477E3.2</b>    | 0.30  | 1.17E-01 | -0.14 | 4.88E-01 |
| <b>RPL23AP70</b>       | 0.11  | 5.87E-01 | 0.14  | 4.88E-01 |
| <b>SH2D1B</b>          | 0.02  | 9.39E-01 | -0.14 | 4.88E-01 |
| <b>SLC36A1</b>         | 0.19  | 3.46E-01 | 0.14  | 4.88E-01 |
| <b>TIMM8B</b>          | 0.16  | 4.30E-01 | 0.14  | 4.88E-01 |
| <b>TLR4</b>            | -0.09 | 6.65E-01 | 0.14  | 4.88E-01 |
| <b>XLOC_012945</b>     | -0.13 | 5.12E-01 | -0.14 | 4.88E-01 |
| <b>ACSS2</b>           | -0.01 | 9.42E-01 | -0.14 | 4.89E-01 |
| <b>BDH2</b>            | -0.26 | 1.88E-01 | -0.14 | 4.89E-01 |
| <b>BTNL8</b>           | 0.09  | 6.52E-01 | -0.14 | 4.89E-01 |
| <b>CTD-2233K9.1</b>    | 0.19  | 3.36E-01 | -0.14 | 4.89E-01 |
| <b>CTD-2600O9.2</b>    | -0.36 | 6.15E-02 | -0.14 | 4.89E-01 |
| <b>DERL3</b>           | -0.02 | 9.36E-01 | -0.14 | 4.89E-01 |
| <b>GNL3</b>            | 0.14  | 4.65E-01 | -0.14 | 4.89E-01 |
| <b>GRM3</b>            | -0.26 | 1.73E-01 | -0.14 | 4.89E-01 |
| <b>KRT8P36</b>         | -0.06 | 7.48E-01 | -0.14 | 4.89E-01 |
| <b>NCKAP5L</b>         | 0.00  | 9.81E-01 | -0.14 | 4.89E-01 |
| <b>OR52I1</b>          | 0.28  | 1.51E-01 | -0.14 | 4.89E-01 |
| <b>PPP3CB-AS1</b>      | -0.31 | 1.04E-01 | -0.14 | 4.89E-01 |
| <b>RP11-126O1.5</b>    | -0.06 | 7.59E-01 | -0.14 | 4.89E-01 |
| <b>RP11-136F16.1</b>   | -0.24 | 2.09E-01 | -0.14 | 4.89E-01 |
| <b>RP11-152F13.7</b>   | -0.14 | 4.72E-01 | -0.14 | 4.89E-01 |
| <b>RP11-359I18.5</b>   | 0.12  | 5.48E-01 | -0.14 | 4.89E-01 |
| <b>RP11-466F5.4</b>    | 0.10  | 5.96E-01 | -0.14 | 4.89E-01 |
| <b>RP11-894J14.5</b>   | -0.02 | 9.32E-01 | -0.14 | 4.89E-01 |
| <b>RP11-96D1.10</b>    | -0.34 | 7.32E-02 | -0.14 | 4.89E-01 |
| <b>RP5-1063M23.1</b>   | -0.08 | 7.00E-01 | -0.14 | 4.89E-01 |
| <b>ST8SIA6</b>         | 0.04  | 8.37E-01 | -0.14 | 4.89E-01 |
| <b>ZNF32-AS2</b>       | -0.08 | 6.85E-01 | -0.14 | 4.89E-01 |
| <b>ATPIF1</b>          | 0.00  | 9.94E-01 | 0.14  | 4.89E-01 |
| <b>B3GNT5</b>          | 0.13  | 5.19E-01 | 0.14  | 4.89E-01 |
| <b>CTB-161M19.4</b>    | -0.01 | 9.50E-01 | 0.14  | 4.89E-01 |
| <b>DNAJB2</b>          | -0.20 | 3.15E-01 | 0.14  | 4.89E-01 |
| <b>FAM53A</b>          | 0.00  | 9.91E-01 | 0.14  | 4.89E-01 |
| <b>IGHV3-74</b>        | 0.28  | 1.42E-01 | 0.14  | 4.89E-01 |
| <b>MIR4252</b>         | -0.03 | 8.64E-01 | 0.14  | 4.89E-01 |
| <b>NTN1</b>            | -0.19 | 3.37E-01 | 0.14  | 4.89E-01 |
| <b>PHF23</b>           | 0.16  | 4.09E-01 | 0.14  | 4.89E-01 |
| <b>PIAS3</b>           | -0.03 | 8.73E-01 | 0.14  | 4.89E-01 |
| <b>RP11-146I2.1</b>    | -0.13 | 5.23E-01 | 0.14  | 4.89E-01 |
| <b>RP11-567P17.2</b>   | 0.16  | 4.27E-01 | 0.14  | 4.89E-01 |
| <b>XLOC_008357</b>     | -0.17 | 3.86E-01 | 0.14  | 4.89E-01 |
| <b>Xbac-BPG249D20.</b> | -0.08 | 6.87E-01 | 0.14  | 4.89E-01 |
| <b>AC006273.5</b>      | -0.07 | 7.16E-01 | -0.14 | 4.90E-01 |

|               |       |          |       |          |
|---------------|-------|----------|-------|----------|
| CCDC144CP     | -0.01 | 9.77E-01 | 0.14  | 4.90E-01 |
| CPEB2-AS1     | 0.00  | 9.85E-01 | -0.14 | 4.90E-01 |
| CXCL13        | 0.13  | 5.23E-01 | 0.14  | 4.90E-01 |
| DESI1         | 0.15  | 4.61E-01 | 0.14  | 4.90E-01 |
| EIF2S1        | 0.19  | 3.26E-01 | -0.14 | 4.90E-01 |
| HBP1          | -0.09 | 6.47E-01 | 0.14  | 4.90E-01 |
| HMGB1P3       | -0.20 | 3.09E-01 | -0.14 | 4.90E-01 |
| LINC00893     | -0.17 | 3.76E-01 | -0.14 | 4.90E-01 |
| LINC00959     | 0.25  | 1.96E-01 | 0.14  | 4.90E-01 |
| LRRC42        | -0.04 | 8.55E-01 | -0.14 | 4.90E-01 |
| MIR3143       | 0.06  | 7.71E-01 | -0.14 | 4.90E-01 |
| MTND2P2       | -0.22 | 2.68E-01 | -0.14 | 4.90E-01 |
| PHLDA3        | 0.22  | 2.53E-01 | 0.14  | 4.90E-01 |
| PIBF1         | -0.01 | 9.55E-01 | -0.14 | 4.90E-01 |
| PRKRIP1       | -0.25 | 2.06E-01 | 0.14  | 4.90E-01 |
| PUM1          | 0.09  | 6.62E-01 | 0.14  | 4.90E-01 |
| RN7SL833P     | 0.35  | 6.48E-02 | -0.14 | 4.90E-01 |
| RNU6-773P     | -0.27 | 1.61E-01 | -0.14 | 4.90E-01 |
| RP11-201O14.2 | 0.10  | 6.15E-01 | 0.14  | 4.90E-01 |
| RP11-266N13.2 | -0.13 | 5.17E-01 | -0.14 | 4.90E-01 |
| RP11-318K15.2 | 0.09  | 6.39E-01 | 0.14  | 4.90E-01 |
| RP11-613M5.2  | -0.07 | 7.38E-01 | -0.14 | 4.90E-01 |
| RP11-730A19.5 | 0.07  | 7.26E-01 | -0.14 | 4.90E-01 |
| RP11-747H7.1  | -0.14 | 4.66E-01 | -0.14 | 4.90E-01 |
| RP11-83B20.5  | -0.27 | 1.69E-01 | -0.14 | 4.90E-01 |
| RP5-1061H20.4 | -0.17 | 3.97E-01 | 0.14  | 4.90E-01 |
| SNAP47        | 0.07  | 7.17E-01 | 0.14  | 4.90E-01 |
| SRGAP2C       | -0.19 | 3.29E-01 | 0.14  | 4.90E-01 |
| SYCP3         | -0.05 | 8.19E-01 | -0.14 | 4.90E-01 |
| TTC27         | 0.07  | 7.19E-01 | -0.14 | 4.90E-01 |
| ZNF320        | -0.06 | 7.43E-01 | -0.14 | 4.90E-01 |
| ZNF454        | -0.05 | 7.87E-01 | 0.14  | 4.90E-01 |
| AC097382.5    | 0.16  | 4.18E-01 | 0.14  | 4.91E-01 |
| AC108059.4    | 0.04  | 8.24E-01 | 0.14  | 4.91E-01 |
| AL133243.3    | -0.32 | 9.59E-02 | 0.14  | 4.91E-01 |
| AMZ1          | 0.16  | 4.06E-01 | 0.14  | 4.91E-01 |
| ANKRD20A19P   | -0.25 | 1.92E-01 | -0.14 | 4.91E-01 |
| ASB7          | 0.16  | 4.06E-01 | 0.14  | 4.91E-01 |
| DPP9          | -0.04 | 8.45E-01 | 0.14  | 4.91E-01 |
| EIF3KP1       | -0.03 | 8.79E-01 | -0.14 | 4.91E-01 |
| EVI2A         | 0.34  | 7.89E-02 | 0.14  | 4.91E-01 |
| FBXO5         | 0.08  | 6.79E-01 | -0.14 | 4.91E-01 |
| FSIP1         | -0.24 | 2.26E-01 | -0.14 | 4.91E-01 |
| GFM1          | 0.20  | 3.02E-01 | -0.14 | 4.91E-01 |
| LSS           | -0.08 | 6.73E-01 | -0.14 | 4.91E-01 |
| MLST8         | 0.06  | 7.59E-01 | 0.14  | 4.91E-01 |
| MT-RNR2       | 0.37  | 5.29E-02 | 0.14  | 4.91E-01 |



|                |       |          |       |          |
|----------------|-------|----------|-------|----------|
| MTNR1A         | 0.25  | 1.98E-01 | 0.14  | 4.91E-01 |
| NAALADL2       | -0.23 | 2.30E-01 | -0.14 | 4.91E-01 |
| RAB34          | 0.09  | 6.41E-01 | 0.14  | 4.91E-01 |
| REEP2          | -0.04 | 8.55E-01 | -0.14 | 4.91E-01 |
| RP11-247113.11 | 0.01  | 9.71E-01 | -0.14 | 4.91E-01 |
| SNORD3B-1      | 0.09  | 6.57E-01 | 0.14  | 4.91E-01 |
| VWC2L          | -0.32 | 9.30E-02 | -0.14 | 4.91E-01 |
| XLOC_005053    | 0.19  | 3.38E-01 | -0.14 | 4.91E-01 |
| ZNF664         | 0.25  | 1.94E-01 | 0.14  | 4.91E-01 |
| ZNF746         | -0.08 | 6.89E-01 | 0.14  | 4.91E-01 |
| AP000437.3     | -0.23 | 2.38E-01 | 0.14  | 4.92E-01 |
| CIRBP          | 0.09  | 6.36E-01 | 0.14  | 4.92E-01 |
| CTC-391G2.1    | 0.12  | 5.43E-01 | 0.14  | 4.92E-01 |
| CYP17A1        | -0.29 | 1.34E-01 | 0.14  | 4.92E-01 |
| DHX35          | 0.03  | 8.61E-01 | 0.14  | 4.92E-01 |
| DNAJB12        | 0.28  | 1.42E-01 | 0.14  | 4.92E-01 |
| MAL            | -0.01 | 9.56E-01 | 0.14  | 4.92E-01 |
| MED28          | 0.02  | 9.09E-01 | 0.14  | 4.92E-01 |
| RN7SL671P      | 0.29  | 1.35E-01 | 0.14  | 4.92E-01 |
| RP1-159A19.3   | -0.08 | 7.00E-01 | 0.14  | 4.92E-01 |
| RP11-321N4.4   | 0.07  | 7.18E-01 | 0.14  | 4.92E-01 |
| THEM4          | 0.14  | 4.65E-01 | 0.14  | 4.92E-01 |
| TMEM229A       | 0.09  | 6.37E-01 | 0.14  | 4.92E-01 |
| G12797         | 0.28  | 1.48E-01 | -0.14 | 4.92E-01 |
| MEIS1-AS2      | 0.17  | 4.01E-01 | -0.14 | 4.92E-01 |
| MOCS3          | 0.16  | 4.20E-01 | -0.14 | 4.92E-01 |
| NOVA1          | -0.30 | 1.24E-01 | -0.14 | 4.92E-01 |
| ODF2L          | -0.13 | 5.11E-01 | -0.14 | 4.92E-01 |
| RASL10A        | 0.11  | 5.64E-01 | -0.14 | 4.92E-01 |
| RBM22P2        | -0.10 | 6.28E-01 | -0.14 | 4.92E-01 |
| STX2           | -0.07 | 7.38E-01 | -0.14 | 4.92E-01 |
| TMPPE          | 0.02  | 9.18E-01 | -0.14 | 4.92E-01 |
| CCDC7          | 0.00  | 9.99E-01 | -0.14 | 4.93E-01 |
| CPNE3          | -0.08 | 6.96E-01 | -0.14 | 4.93E-01 |
| CTD-2196E14.6  | 0.09  | 6.40E-01 | -0.14 | 4.93E-01 |
| CTD-2286N8.1   | -0.05 | 7.97E-01 | -0.14 | 4.93E-01 |
| ETS1           | 0.19  | 3.20E-01 | 0.14  | 4.93E-01 |
| FAAH2          | 0.13  | 5.25E-01 | 0.14  | 4.93E-01 |
| G25988         | -0.02 | 9.01E-01 | -0.14 | 4.93E-01 |
| G5664          | 0.23  | 2.43E-01 | -0.14 | 4.93E-01 |
| LINC01465      | 0.06  | 7.53E-01 | -0.14 | 4.93E-01 |
| LYPD2          | -0.08 | 6.87E-01 | 0.14  | 4.93E-01 |
| MRPL57P8       | 0.27  | 1.69E-01 | -0.14 | 4.93E-01 |
| PCNXL2         | -0.08 | 6.69E-01 | -0.14 | 4.93E-01 |
| PHF20L1        | 0.22  | 2.60E-01 | -0.14 | 4.93E-01 |
| PNISR          | -0.23 | 2.31E-01 | -0.14 | 4.93E-01 |
| PPP2R3C        | -0.05 | 8.11E-01 | 0.14  | 4.93E-01 |

|                      |       |          |       |          |
|----------------------|-------|----------|-------|----------|
| <b>RP11-481C4.2</b>  | -0.13 | 4.96E-01 | -0.14 | 4.93E-01 |
| <b>RP11-482M8.1</b>  | -0.05 | 7.87E-01 | 0.14  | 4.93E-01 |
| <b>RP11-49K24.3</b>  | 0.13  | 5.26E-01 | -0.14 | 4.93E-01 |
| <b>RP11-588G21.2</b> | 0.19  | 3.39E-01 | 0.14  | 4.93E-01 |
| <b>RP11-75A9.3</b>   | -0.04 | 8.36E-01 | -0.14 | 4.93E-01 |
| <b>RP3-512B11.3</b>  | -0.02 | 9.08E-01 | 0.14  | 4.93E-01 |
| <b>RP4-564F22.7</b>  | 0.16  | 4.24E-01 | -0.14 | 4.93E-01 |
| <b>SLC6A17</b>       | -0.58 | 1.19E-03 | -0.14 | 4.93E-01 |
| <b>SLC9A7</b>        | 0.19  | 3.38E-01 | 0.14  | 4.93E-01 |
| <b>SNORA7</b>        | -0.17 | 3.95E-01 | -0.14 | 4.93E-01 |
| <b>SPATA21</b>       | -0.07 | 7.28E-01 | 0.14  | 4.93E-01 |
| <b>TSC2</b>          | -0.07 | 7.14E-01 | 0.14  | 4.93E-01 |
| <b>AC007191.4</b>    | 0.05  | 8.13E-01 | -0.14 | 4.94E-01 |
| <b>ACSF2</b>         | -0.10 | 5.97E-01 | -0.14 | 4.94E-01 |
| <b>MASP2</b>         | -0.22 | 2.56E-01 | -0.14 | 4.94E-01 |
| <b>MTRF1LP1</b>      | -0.01 | 9.53E-01 | -0.14 | 4.94E-01 |
| <b>NRDE2</b>         | 0.10  | 6.10E-01 | -0.14 | 4.94E-01 |
| <b>RNU6-1161P</b>    | 0.19  | 3.24E-01 | -0.14 | 4.94E-01 |
| <b>RP1-102E24.6</b>  | -0.05 | 8.16E-01 | -0.14 | 4.94E-01 |
| <b>RP11-15B17.4</b>  | -0.34 | 7.84E-02 | -0.14 | 4.94E-01 |
| <b>RP11-286N3.2</b>  | -0.08 | 6.94E-01 | -0.14 | 4.94E-01 |
| <b>RP11-305O6.4</b>  | -0.06 | 7.70E-01 | -0.14 | 4.94E-01 |
| <b>RP11-787D18.2</b> | -0.04 | 8.46E-01 | -0.14 | 4.94E-01 |
| <b>SELK</b>          | 0.02  | 9.31E-01 | -0.14 | 4.94E-01 |
| <b>ZBTB41</b>        | -0.02 | 9.37E-01 | -0.14 | 4.94E-01 |
| <b>CD52</b>          | -0.19 | 3.20E-01 | 0.14  | 4.94E-01 |
| <b>CLDND1</b>        | 0.11  | 5.70E-01 | 0.14  | 4.94E-01 |
| <b>CMP21-97G8.1</b>  | 0.12  | 5.27E-01 | 0.14  | 4.94E-01 |
| <b>COL6A4P2</b>      | 0.07  | 7.32E-01 | 0.14  | 4.94E-01 |
| <b>COX4I1</b>        | -0.01 | 9.60E-01 | 0.14  | 4.94E-01 |
| <b>HMG2P30</b>       | 0.14  | 4.85E-01 | 0.14  | 4.94E-01 |
| <b>INTS7</b>         | 0.07  | 7.15E-01 | 0.14  | 4.94E-01 |
| <b>MEOX1</b>         | 0.06  | 7.81E-01 | 0.14  | 4.94E-01 |
| <b>MPST</b>          | 0.07  | 7.27E-01 | 0.14  | 4.94E-01 |
| <b>PHACTR4</b>       | 0.04  | 8.32E-01 | 0.14  | 4.94E-01 |
| <b>RET</b>           | 0.05  | 8.09E-01 | 0.14  | 4.94E-01 |
| <b>RP11-382A20.7</b> | -0.20 | 3.09E-01 | 0.14  | 4.94E-01 |
| <b>RP11-466A19.6</b> | -0.05 | 8.04E-01 | 0.14  | 4.94E-01 |
| <b>RP4-612B15.3</b>  | 0.07  | 7.19E-01 | 0.14  | 4.94E-01 |
| <b>SH2B1</b>         | -0.13 | 5.26E-01 | 0.14  | 4.94E-01 |
| <b>TEP1</b>          | -0.13 | 5.00E-01 | 0.14  | 4.94E-01 |
| <b>ZNF267</b>        | -0.13 | 5.08E-01 | 0.14  | 4.94E-01 |
| <b>AC002551.1</b>    | -0.18 | 3.52E-01 | -0.14 | 4.95E-01 |
| <b>AC004158.3</b>    | -0.19 | 3.37E-01 | -0.14 | 4.95E-01 |
| <b>AC019070.1</b>    | -0.05 | 8.05E-01 | -0.14 | 4.95E-01 |
| <b>AC068620.1</b>    | 0.09  | 6.55E-01 | -0.14 | 4.95E-01 |
| <b>ACTG1P1</b>       | -0.36 | 5.86E-02 | -0.14 | 4.95E-01 |

|                |       |          |       |          |
|----------------|-------|----------|-------|----------|
| CD1D           | 0.23  | 2.33E-01 | -0.14 | 4.95E-01 |
| CDRT4          | -0.44 | 1.84E-02 | -0.14 | 4.95E-01 |
| DEFB109P3      | -0.10 | 6.13E-01 | -0.14 | 4.95E-01 |
| FAM21FP        | -0.26 | 1.84E-01 | -0.14 | 4.95E-01 |
| FAXDC2         | 0.42  | 2.65E-02 | -0.14 | 4.95E-01 |
| FNBP4          | 0.04  | 8.31E-01 | -0.14 | 4.95E-01 |
| G26573         | -0.11 | 5.90E-01 | -0.14 | 4.95E-01 |
| H3F3C          | 0.11  | 5.69E-01 | -0.14 | 4.95E-01 |
| KRT7           | -0.21 | 2.93E-01 | -0.14 | 4.95E-01 |
| LRTOMT         | 0.01  | 9.49E-01 | -0.14 | 4.95E-01 |
| NR4A1          | -0.19 | 3.30E-01 | -0.14 | 4.95E-01 |
| PLA2G5         | 0.18  | 3.50E-01 | -0.14 | 4.95E-01 |
| RNU6-522P      | -0.08 | 6.92E-01 | -0.14 | 4.95E-01 |
| RNU6-724P      | 0.06  | 7.63E-01 | -0.14 | 4.95E-01 |
| RP1-117O3.2    | -0.23 | 2.47E-01 | -0.14 | 4.95E-01 |
| RP11-292B8.1   | -0.39 | 4.00E-02 | -0.14 | 4.95E-01 |
| RP11-478C1.8   | -0.36 | 6.09E-02 | -0.14 | 4.95E-01 |
| RP4-791M13.5   | 0.01  | 9.74E-01 | -0.14 | 4.95E-01 |
| SLC4A9         | 0.18  | 3.61E-01 | -0.14 | 4.95E-01 |
| TSPAN6         | 0.15  | 4.48E-01 | -0.14 | 4.95E-01 |
| ATXN2L         | 0.03  | 8.90E-01 | 0.14  | 4.95E-01 |
| CMC2           | 0.10  | 6.29E-01 | 0.14  | 4.95E-01 |
| EEPDI          | 0.10  | 6.12E-01 | 0.14  | 4.95E-01 |
| FAM161B        | 0.21  | 2.91E-01 | 0.14  | 4.95E-01 |
| GATA3-AS1      | -0.48 | 9.61E-03 | 0.14  | 4.95E-01 |
| MSTO1          | 0.03  | 8.68E-01 | 0.14  | 4.95E-01 |
| RP11-752G15.10 | 0.32  | 9.81E-02 | 0.14  | 4.95E-01 |
| RP3-404F18.5   | 0.39  | 3.76E-02 | 0.14  | 4.95E-01 |
| RPL26P35       | 0.43  | 2.32E-02 | 0.14  | 4.95E-01 |
| TM9SF4         | 0.11  | 5.84E-01 | 0.14  | 4.95E-01 |
| UBE2L6         | 0.25  | 2.07E-01 | 0.14  | 4.95E-01 |
| AGAP8          | 0.08  | 6.82E-01 | -0.14 | 4.96E-01 |
| ALOX12P1       | -0.23 | 2.35E-01 | 0.14  | 4.96E-01 |
| CCNL1          | 0.00  | 9.92E-01 | -0.14 | 4.96E-01 |
| CDKN1B         | -0.19 | 3.44E-01 | -0.14 | 4.96E-01 |
| CLUH           | 0.19  | 3.39E-01 | 0.14  | 4.96E-01 |
| CTC-448F2.6    | -0.09 | 6.47E-01 | -0.14 | 4.96E-01 |
| G43235         | -0.06 | 7.75E-01 | -0.14 | 4.96E-01 |
| GP5            | 0.32  | 9.18E-02 | 0.14  | 4.96E-01 |
| HGS            | 0.15  | 4.60E-01 | 0.14  | 4.96E-01 |
| HMCN2          | 0.00  | 9.82E-01 | 0.14  | 4.96E-01 |
| KIAA1551       | 0.23  | 2.50E-01 | 0.14  | 4.96E-01 |
| LINC00092      | -0.21 | 2.83E-01 | 0.14  | 4.96E-01 |
| MICAL1         | -0.12 | 5.41E-01 | 0.14  | 4.96E-01 |
| MRPS23         | 0.04  | 8.25E-01 | -0.14 | 4.96E-01 |
| MTSS1L         | -0.19 | 3.43E-01 | 0.14  | 4.96E-01 |
| NANP           | 0.30  | 1.16E-01 | -0.14 | 4.96E-01 |

|               |       |          |       |          |
|---------------|-------|----------|-------|----------|
| PPIC          | 0.14  | 4.62E-01 | 0.14  | 4.96E-01 |
| RBBP5         | 0.31  | 1.12E-01 | -0.14 | 4.96E-01 |
| RNA5SP210     | -0.10 | 6.31E-01 | -0.14 | 4.96E-01 |
| RNU2-63P      | 0.06  | 7.64E-01 | 0.14  | 4.96E-01 |
| RNU6-606P     | 0.08  | 6.97E-01 | 0.14  | 4.96E-01 |
| RP11-173A16.2 | 0.13  | 5.12E-01 | -0.14 | 4.96E-01 |
| RP11-206L10.9 | -0.01 | 9.40E-01 | -0.14 | 4.96E-01 |
| RP11-303E16.5 | 0.09  | 6.35E-01 | -0.14 | 4.96E-01 |
| RP11-322E11.3 | 0.21  | 2.80E-01 | 0.14  | 4.96E-01 |
| RP11-399J13.2 | -0.12 | 5.40E-01 | -0.14 | 4.96E-01 |
| RP11-782C8.2  | -0.14 | 4.64E-01 | 0.14  | 4.96E-01 |
| RTN4R         | -0.03 | 8.64E-01 | -0.14 | 4.96E-01 |
| SDSL          | 0.00  | 9.86E-01 | -0.14 | 4.96E-01 |
| SEPSECS       | -0.17 | 3.91E-01 | -0.14 | 4.96E-01 |
| SEPT7P9       | -0.28 | 1.44E-01 | -0.14 | 4.96E-01 |
| ST6GALNAC4    | 0.35  | 6.98E-02 | 0.14  | 4.96E-01 |
| TADA3         | 0.29  | 1.32E-01 | 0.14  | 4.96E-01 |
| UAP1          | 0.15  | 4.60E-01 | 0.14  | 4.96E-01 |
| URM1          | 0.10  | 6.10E-01 | 0.14  | 4.96E-01 |
| ZNF501        | -0.09 | 6.65E-01 | -0.14 | 4.96E-01 |
| AC009299.2    | 0.13  | 5.00E-01 | -0.14 | 4.97E-01 |
| AF131215.2    | -0.06 | 7.60E-01 | -0.14 | 4.97E-01 |
| AMER2         | -0.17 | 3.87E-01 | -0.14 | 4.97E-01 |
| AREG          | 0.07  | 7.24E-01 | -0.14 | 4.97E-01 |
| C17orf51      | 0.04  | 8.24E-01 | 0.14  | 4.97E-01 |
| CACTIN        | -0.25 | 1.99E-01 | 0.14  | 4.97E-01 |
| CHIC2         | 0.25  | 2.03E-01 | 0.14  | 4.97E-01 |
| CTC-308K20.3  | 0.05  | 8.08E-01 | 0.14  | 4.97E-01 |
| CTC-457L16.1  | 0.01  | 9.42E-01 | -0.14 | 4.97E-01 |
| EPN2          | -0.40 | 3.58E-02 | -0.14 | 4.97E-01 |
| ERGIC3        | 0.09  | 6.59E-01 | 0.14  | 4.97E-01 |
| FN3KRP        | -0.13 | 5.00E-01 | 0.14  | 4.97E-01 |
| G RTP1        | 0.02  | 9.14E-01 | -0.14 | 4.97E-01 |
| LINC01189     | -0.04 | 8.40E-01 | 0.14  | 4.97E-01 |
| LN X1-AS1     | 0.11  | 5.65E-01 | -0.14 | 4.97E-01 |
| LTBP3         | -0.14 | 4.62E-01 | -0.14 | 4.97E-01 |
| NANO GNB P3   | -0.11 | 5.61E-01 | 0.14  | 4.97E-01 |
| NKILA         | 0.33  | 8.78E-02 | -0.14 | 4.97E-01 |
| RN7SL688P     | -0.04 | 8.43E-01 | 0.14  | 4.97E-01 |
| RP1-45I4.3    | 0.31  | 1.11E-01 | -0.14 | 4.97E-01 |
| RP11-323I15.2 | -0.09 | 6.66E-01 | 0.14  | 4.97E-01 |
| RP11-330L19.1 | -0.19 | 3.44E-01 | -0.14 | 4.97E-01 |
| RP11-404P21.3 | 0.07  | 7.33E-01 | -0.14 | 4.97E-01 |
| RP11-567F11.2 | -0.13 | 5.01E-01 | -0.14 | 4.97E-01 |
| RP11-667M19.9 | 0.01  | 9.61E-01 | 0.14  | 4.97E-01 |
| RPL21P119     | 0.12  | 5.57E-01 | -0.14 | 4.97E-01 |
| RPRD2         | -0.14 | 4.81E-01 | 0.14  | 4.97E-01 |

|               |       |          |       |          |
|---------------|-------|----------|-------|----------|
| SGK494        | -0.14 | 4.69E-01 | -0.14 | 4.97E-01 |
| SHARPIN       | 0.33  | 8.70E-02 | 0.14  | 4.97E-01 |
| SNORD38A      | 0.01  | 9.61E-01 | -0.14 | 4.97E-01 |
| TMEM97        | 0.00  | 9.85E-01 | -0.14 | 4.97E-01 |
| WAPL          | -0.17 | 4.01E-01 | -0.14 | 4.97E-01 |
| XLOC_004915   | -0.24 | 2.11E-01 | 0.14  | 4.97E-01 |
| XLOC_005041   | -0.35 | 6.68E-02 | -0.14 | 4.97E-01 |
| ZNF259P1      | -0.25 | 2.03E-01 | -0.14 | 4.97E-01 |
| AC104451.2    | -0.19 | 3.27E-01 | -0.14 | 4.98E-01 |
| AIRN          | -0.03 | 8.81E-01 | -0.14 | 4.98E-01 |
| AKR7A3        | -0.15 | 4.56E-01 | -0.14 | 4.98E-01 |
| DDX11         | 0.30  | 1.23E-01 | -0.14 | 4.98E-01 |
| G39379        | -0.11 | 5.71E-01 | -0.14 | 4.98E-01 |
| HEATR6        | 0.08  | 6.94E-01 | 0.14  | 4.98E-01 |
| INO80D        | 0.15  | 4.52E-01 | -0.14 | 4.98E-01 |
| ITPR1         | 0.47  | 1.08E-02 | 0.14  | 4.98E-01 |
| LCNL1         | -0.28 | 1.44E-01 | -0.14 | 4.98E-01 |
| LINC01543     | -0.21 | 2.88E-01 | -0.14 | 4.98E-01 |
| MIR193BHG     | -0.37 | 5.58E-02 | -0.14 | 4.98E-01 |
| NOL6          | 0.26  | 1.73E-01 | 0.14  | 4.98E-01 |
| PCDHGB3       | -0.20 | 3.05E-01 | -0.14 | 4.98E-01 |
| PIGR          | -0.08 | 6.86E-01 | -0.14 | 4.98E-01 |
| PKN1          | -0.20 | 3.17E-01 | 0.14  | 4.98E-01 |
| RP11-1113L8.1 | 0.07  | 7.28E-01 | -0.14 | 4.98E-01 |
| RP11-242D8.2  | -0.02 | 9.04E-01 | -0.14 | 4.98E-01 |
| RP11-44I10.3  | -0.06 | 7.45E-01 | -0.14 | 4.98E-01 |
| RP5-1028L10.1 | 0.12  | 5.51E-01 | 0.14  | 4.98E-01 |
| RPS19BP1      | 0.08  | 6.99E-01 | 0.14  | 4.98E-01 |
| SLC14A1       | 0.38  | 4.73E-02 | -0.14 | 4.98E-01 |
| SMARCD3       | 0.34  | 7.56E-02 | 0.14  | 4.98E-01 |
| SNORD104      | 0.05  | 8.04E-01 | -0.14 | 4.98E-01 |
| STS           | -0.11 | 5.84E-01 | 0.14  | 4.98E-01 |
| TMEM177       | 0.01  | 9.48E-01 | 0.14  | 4.98E-01 |
| TPM3P1        | -0.05 | 7.84E-01 | -0.14 | 4.98E-01 |
| TRBV30        | -0.44 | 2.04E-02 | -0.14 | 4.98E-01 |
| TRIM40        | 0.00  | 9.98E-01 | -0.14 | 4.98E-01 |
| WWC1          | -0.11 | 5.92E-01 | -0.14 | 4.98E-01 |
| AAED1         | 0.01  | 9.63E-01 | 0.14  | 4.99E-01 |
| AC004490.1    | 0.06  | 7.59E-01 | 0.14  | 4.99E-01 |
| AC008073.7    | -0.38 | 4.61E-02 | -0.14 | 4.99E-01 |
| ADRA1B        | -0.13 | 5.17E-01 | 0.14  | 4.99E-01 |
| BCL7A         | -0.32 | 9.93E-02 | -0.14 | 4.99E-01 |
| CCDC116       | -0.08 | 6.82E-01 | -0.14 | 4.99E-01 |
| CES1P1        | -0.20 | 3.17E-01 | -0.14 | 4.99E-01 |
| CFH           | -0.08 | 6.97E-01 | -0.14 | 4.99E-01 |
| COQ7          | 0.45  | 1.74E-02 | 0.14  | 4.99E-01 |
| CTD-2353F22.2 | 0.23  | 2.34E-01 | -0.14 | 4.99E-01 |

|               |       |          |       |          |
|---------------|-------|----------|-------|----------|
| EEF2          | 0.13  | 5.19E-01 | 0.14  | 4.99E-01 |
| FAM32A        | 0.08  | 6.68E-01 | 0.14  | 4.99E-01 |
| G41275        | -0.18 | 3.47E-01 | -0.14 | 4.99E-01 |
| GGN           | -0.28 | 1.43E-01 | 0.14  | 4.99E-01 |
| HCG20         | -0.32 | 9.96E-02 | -0.14 | 4.99E-01 |
| HEXA          | 0.04  | 8.45E-01 | 0.14  | 4.99E-01 |
| HLCS-IT1      | -0.14 | 4.91E-01 | -0.14 | 4.99E-01 |
| IL27          | -0.43 | 2.34E-02 | -0.14 | 4.99E-01 |
| LPIN2         | 0.34  | 7.89E-02 | 0.14  | 4.99E-01 |
| MECP2         | 0.10  | 6.25E-01 | -0.14 | 4.99E-01 |
| NSUN7         | 0.05  | 8.07E-01 | -0.14 | 4.99E-01 |
| PAPOLG        | 0.10  | 6.11E-01 | 0.14  | 4.99E-01 |
| PCDHA10       | 0.01  | 9.76E-01 | -0.14 | 4.99E-01 |
| PCYT1A        | 0.14  | 4.90E-01 | -0.14 | 4.99E-01 |
| PLCD4         | 0.17  | 3.75E-01 | 0.14  | 4.99E-01 |
| PPBP          | -0.18 | 3.66E-01 | -0.14 | 4.99E-01 |
| PRR34-AS1     | -0.09 | 6.55E-01 | 0.14  | 4.99E-01 |
| RNU2-7P       | -0.20 | 3.14E-01 | -0.14 | 4.99E-01 |
| RP11-28H5.2   | 0.28  | 1.44E-01 | -0.14 | 4.99E-01 |
| RP11-352B15.2 | -0.38 | 4.31E-02 | -0.14 | 4.99E-01 |
| RP11-407H12.8 | -0.34 | 7.66E-02 | -0.14 | 4.99E-01 |
| RP11-470B22.1 | 0.19  | 3.32E-01 | 0.14  | 4.99E-01 |
| RUNX2         | -0.02 | 9.36E-01 | 0.14  | 4.99E-01 |
| SMG1P2        | -0.02 | 9.35E-01 | -0.14 | 4.99E-01 |
| TAS1R3        | -0.03 | 8.83E-01 | -0.14 | 4.99E-01 |
| TSEN2         | 0.08  | 6.69E-01 | 0.14  | 4.99E-01 |
| UCKL1         | -0.19 | 3.41E-01 | 0.14  | 4.99E-01 |
| AC020629.1    | -0.19 | 3.43E-01 | 0.14  | 5.00E-01 |
| AC138783.12   | 0.05  | 7.84E-01 | -0.14 | 5.00E-01 |
| AF131215.6    | -0.10 | 6.18E-01 | -0.14 | 5.00E-01 |
| ALAS1         | 0.31  | 1.11E-01 | 0.14  | 5.00E-01 |
| C19orf73      | 0.22  | 2.63E-01 | 0.14  | 5.00E-01 |
| C20orf196     | 0.04  | 8.58E-01 | 0.14  | 5.00E-01 |
| CASP2         | -0.11 | 5.67E-01 | 0.14  | 5.00E-01 |
| CCDC25        | 0.04  | 8.46E-01 | 0.14  | 5.00E-01 |
| CLN6          | 0.05  | 8.14E-01 | 0.14  | 5.00E-01 |
| CTD-3222D19.9 | 0.06  | 7.69E-01 | -0.14 | 5.00E-01 |
| DRGX          | -0.37 | 5.50E-02 | -0.14 | 5.00E-01 |
| DSCR9         | 0.45  | 1.74E-02 | -0.14 | 5.00E-01 |
| EEF1A2        | 0.11  | 5.84E-01 | 0.14  | 5.00E-01 |
| EVL           | -0.05 | 8.15E-01 | 0.14  | 5.00E-01 |
| FAAP20        | 0.17  | 3.98E-01 | 0.14  | 5.00E-01 |
| FAHD1         | 0.22  | 2.51E-01 | 0.14  | 5.00E-01 |
| GBAS          | 0.19  | 3.34E-01 | 0.14  | 5.00E-01 |
| GBP5          | 0.23  | 2.35E-01 | 0.14  | 5.00E-01 |
| GIN1          | 0.01  | 9.59E-01 | 0.14  | 5.00E-01 |
| GTF2IP7       | -0.13 | 5.21E-01 | -0.14 | 5.00E-01 |

|                       |       |          |       |          |
|-----------------------|-------|----------|-------|----------|
| <b>GUCA1A</b>         | -0.37 | 5.23E-02 | 0.14  | 5.00E-01 |
| <b>HLF</b>            | -0.04 | 8.22E-01 | -0.14 | 5.00E-01 |
| <b>KCTD19</b>         | -0.03 | 8.94E-01 | -0.14 | 5.00E-01 |
| <b>LBX2-AS1</b>       | 0.01  | 9.44E-01 | 0.14  | 5.00E-01 |
| <b>LINC00565</b>      | 0.18  | 3.57E-01 | -0.14 | 5.00E-01 |
| <b>MST1</b>           | 0.07  | 7.14E-01 | -0.14 | 5.00E-01 |
| <b>NOC4L</b>          | 0.12  | 5.33E-01 | 0.14  | 5.00E-01 |
| <b>RNU6-824P</b>      | -0.15 | 4.57E-01 | -0.14 | 5.00E-01 |
| <b>RP11-110I1.13</b>  | 0.19  | 3.24E-01 | -0.14 | 5.00E-01 |
| <b>RP11-111M22.3</b>  | 0.06  | 7.72E-01 | 0.14  | 5.00E-01 |
| <b>RP11-12J10.3</b>   | -0.35 | 6.68E-02 | -0.14 | 5.00E-01 |
| <b>RP11-18B3.2</b>    | 0.10  | 6.30E-01 | -0.14 | 5.00E-01 |
| <b>RP11-192H23.4</b>  | -0.20 | 3.17E-01 | -0.14 | 5.00E-01 |
| <b>RP11-286N22.8</b>  | -0.25 | 1.94E-01 | -0.14 | 5.00E-01 |
| <b>RP11-295H24.3</b>  | 0.05  | 7.84E-01 | -0.14 | 5.00E-01 |
| <b>RP11-356O9.1</b>   | -0.25 | 1.93E-01 | 0.14  | 5.00E-01 |
| <b>RP11-481A20.11</b> | -0.46 | 1.40E-02 | -0.14 | 5.00E-01 |
| <b>RP11-647K16.1</b>  | 0.05  | 8.07E-01 | -0.14 | 5.00E-01 |
| <b>RP4-635E18.8</b>   | 0.00  | 9.92E-01 | -0.14 | 5.00E-01 |
| <b>SLC25A25-AS1</b>   | 0.13  | 5.05E-01 | -0.14 | 5.00E-01 |
| <b>SLC6A14</b>        | 0.28  | 1.54E-01 | -0.14 | 5.00E-01 |
| <b>SNHG24</b>         | -0.09 | 6.60E-01 | 0.14  | 5.00E-01 |
| <b>VAMP2</b>          | -0.11 | 5.61E-01 | -0.14 | 5.00E-01 |
| <b>XLOC_011772</b>    | 0.22  | 2.56E-01 | 0.14  | 5.00E-01 |
| <b>XLOC_013463</b>    | -0.12 | 5.30E-01 | -0.14 | 5.00E-01 |
| <b>ZNF639</b>         | 0.11  | 5.93E-01 | -0.14 | 5.00E-01 |
| <b>ZSWIM1</b>         | 0.55  | 2.18E-03 | 0.14  | 5.00E-01 |
| <b>hsa-mir-3149</b>   | -0.21 | 2.89E-01 | 0.14  | 5.00E-01 |
| <b>CBL</b>            | 0.14  | 4.69E-01 | 0.14  | 5.01E-01 |
| <b>CCS</b>            | 0.05  | 8.01E-01 | 0.14  | 5.01E-01 |
| <b>FLJ31356</b>       | 0.01  | 9.74E-01 | 0.14  | 5.01E-01 |
| <b>G25302</b>         | -0.12 | 5.46E-01 | -0.14 | 5.01E-01 |
| <b>G34279</b>         | 0.23  | 2.48E-01 | -0.14 | 5.01E-01 |
| <b>G36288</b>         | -0.06 | 7.62E-01 | -0.14 | 5.01E-01 |
| <b>HTR7P1</b>         | -0.10 | 6.03E-01 | 0.14  | 5.01E-01 |
| <b>MACF1</b>          | -0.15 | 4.35E-01 | -0.14 | 5.01E-01 |
| <b>MIR1285-1</b>      | -0.21 | 2.95E-01 | -0.14 | 5.01E-01 |
| <b>MIR3174</b>        | 0.07  | 7.37E-01 | -0.14 | 5.01E-01 |
| <b>OPA3</b>           | 0.32  | 9.45E-02 | 0.14  | 5.01E-01 |
| <b>PARVG</b>          | 0.46  | 1.40E-02 | 0.14  | 5.01E-01 |
| <b>PHF12</b>          | -0.15 | 4.48E-01 | 0.14  | 5.01E-01 |
| <b>POLDIP3</b>        | 0.12  | 5.56E-01 | 0.14  | 5.01E-01 |
| <b>PREB</b>           | 0.10  | 6.25E-01 | 0.14  | 5.01E-01 |
| <b>RNPEP</b>          | 0.16  | 4.08E-01 | 0.14  | 5.01E-01 |
| <b>RP11-192M23.1</b>  | -0.12 | 5.28E-01 | -0.14 | 5.01E-01 |
| <b>RP11-203I2.1</b>   | -0.32 | 9.47E-02 | 0.14  | 5.01E-01 |
| <b>RP11-20B7.1</b>    | 0.25  | 1.93E-01 | -0.14 | 5.01E-01 |

|               |       |          |       |          |
|---------------|-------|----------|-------|----------|
| RP11-77K12.9  | -0.08 | 6.84E-01 | -0.14 | 5.01E-01 |
| RP11-799B12.1 | 0.17  | 3.92E-01 | -0.14 | 5.01E-01 |
| RPL5P4        | -0.24 | 2.22E-01 | -0.14 | 5.01E-01 |
| SCARNA9       | -0.15 | 4.57E-01 | -0.14 | 5.01E-01 |
| SLC39A8       | 0.03  | 8.89E-01 | -0.14 | 5.01E-01 |
| SNORD56       | 0.00  | 9.97E-01 | -0.14 | 5.01E-01 |
| SPCS3         | 0.13  | 5.07E-01 | -0.14 | 5.01E-01 |
| STXBP5        | 0.00  | 9.83E-01 | 0.14  | 5.01E-01 |
| TMEM87A       | -0.02 | 9.34E-01 | 0.14  | 5.01E-01 |
| TRIM52-AS1    | 0.03  | 8.83E-01 | -0.14 | 5.01E-01 |
| UGP2          | 0.19  | 3.29E-01 | 0.14  | 5.01E-01 |
| ZEB1          | -0.06 | 7.65E-01 | 0.14  | 5.01E-01 |
| ZNF324        | 0.17  | 3.92E-01 | -0.14 | 5.01E-01 |
| ZNF551        | 0.11  | 5.77E-01 | -0.14 | 5.01E-01 |
| AC016700.6    | 0.08  | 6.69E-01 | 0.14  | 5.02E-01 |
| AC118344.1    | -0.26 | 1.83E-01 | 0.14  | 5.02E-01 |
| AHSP          | 0.25  | 1.95E-01 | -0.14 | 5.02E-01 |
| AP001469.7    | 0.09  | 6.62E-01 | -0.14 | 5.02E-01 |
| ASTL          | -0.19 | 3.32E-01 | -0.14 | 5.02E-01 |
| C10orf128     | -0.28 | 1.48E-01 | 0.14  | 5.02E-01 |
| C22orf31      | -0.30 | 1.26E-01 | -0.14 | 5.02E-01 |
| CORO2B        | -0.43 | 2.39E-02 | -0.14 | 5.02E-01 |
| EEF1A1P10     | 0.27  | 1.64E-01 | -0.14 | 5.02E-01 |
| EIF4A1P8      | -0.15 | 4.36E-01 | 0.14  | 5.02E-01 |
| EIF4EBP2      | 0.11  | 5.73E-01 | -0.14 | 5.02E-01 |
| FAHD2CP       | -0.21 | 2.78E-01 | -0.14 | 5.02E-01 |
| GPI           | 0.20  | 3.16E-01 | 0.14  | 5.02E-01 |
| IFITM4P       | -0.21 | 2.76E-01 | -0.14 | 5.02E-01 |
| KTN1          | -0.11 | 5.72E-01 | 0.14  | 5.02E-01 |
| MDM4          | -0.18 | 3.57E-01 | -0.14 | 5.02E-01 |
| MRPL55        | -0.13 | 5.12E-01 | 0.14  | 5.02E-01 |
| MYO5B         | -0.03 | 8.94E-01 | -0.14 | 5.02E-01 |
| PDK2          | 0.05  | 7.89E-01 | 0.14  | 5.02E-01 |
| RNU6ATAC39P   | -0.13 | 5.21E-01 | -0.14 | 5.02E-01 |
| RP11-107F6.3  | -0.02 | 9.25E-01 | 0.14  | 5.02E-01 |
| RP11-203L2.3  | -0.24 | 2.13E-01 | -0.14 | 5.02E-01 |
| RP11-573M3.2  | -0.23 | 2.37E-01 | -0.14 | 5.02E-01 |
| RP11-711K1.8  | -0.10 | 5.98E-01 | -0.14 | 5.02E-01 |
| SMG1P6        | 0.27  | 1.69E-01 | -0.14 | 5.02E-01 |
| SPAG4         | 0.08  | 7.01E-01 | -0.14 | 5.02E-01 |
| SPRYD7        | 0.36  | 6.37E-02 | -0.14 | 5.02E-01 |
| STX17         | -0.19 | 3.44E-01 | 0.14  | 5.02E-01 |
| SUV39H1       | 0.16  | 4.26E-01 | 0.14  | 5.02E-01 |
| UGT1A4        | 0.07  | 7.23E-01 | -0.14 | 5.02E-01 |
| WNT5B         | 0.07  | 7.14E-01 | 0.14  | 5.02E-01 |
| ZNF671        | 0.14  | 4.79E-01 | 0.14  | 5.02E-01 |
| AC005255.3    | -0.03 | 8.66E-01 | 0.13  | 5.03E-01 |



|                |       |          |       |          |
|----------------|-------|----------|-------|----------|
| AC006277.3     | 0.22  | 2.54E-01 | -0.13 | 5.03E-01 |
| AC011747.4     | 0.07  | 7.06E-01 | 0.13  | 5.03E-01 |
| ACHE           | -0.11 | 5.76E-01 | -0.13 | 5.03E-01 |
| ACTA2-AS1      | -0.05 | 8.14E-01 | -0.13 | 5.03E-01 |
| CTD-2341M24.1  | -0.01 | 9.61E-01 | 0.13  | 5.03E-01 |
| DHCR7          | 0.31  | 1.08E-01 | 0.13  | 5.03E-01 |
| DMGDH          | -0.07 | 7.37E-01 | -0.13 | 5.03E-01 |
| DSE            | 0.08  | 7.01E-01 | 0.13  | 5.03E-01 |
| ELAVL4         | 0.27  | 1.64E-01 | -0.13 | 5.03E-01 |
| ENPP4          | -0.12 | 5.37E-01 | -0.13 | 5.03E-01 |
| FKBP15         | -0.12 | 5.29E-01 | 0.13  | 5.03E-01 |
| KIRREL3        | 0.10  | 6.29E-01 | -0.13 | 5.03E-01 |
| MEG9           | -0.23 | 2.32E-01 | 0.13  | 5.03E-01 |
| MRPL10         | 0.14  | 4.91E-01 | 0.13  | 5.03E-01 |
| RP11-286O18.1  | -0.28 | 1.51E-01 | 0.13  | 5.03E-01 |
| RP11-299J3.8   | -0.30 | 1.22E-01 | -0.13 | 5.03E-01 |
| RP11-72I8.1    | -0.41 | 3.08E-02 | -0.13 | 5.03E-01 |
| SAT2           | 0.11  | 5.68E-01 | 0.13  | 5.03E-01 |
| SLC13A5        | 0.24  | 2.26E-01 | -0.13 | 5.03E-01 |
| TIMM10B        | 0.12  | 5.32E-01 | 0.13  | 5.03E-01 |
| TMED3          | 0.03  | 8.92E-01 | 0.13  | 5.03E-01 |
| YTHDC2         | 0.19  | 3.31E-01 | -0.13 | 5.03E-01 |
| ZNF25          | 0.03  | 8.86E-01 | -0.13 | 5.03E-01 |
| AC007405.6     | 0.09  | 6.64E-01 | -0.13 | 5.04E-01 |
| AC016831.6     | -0.22 | 2.59E-01 | -0.13 | 5.04E-01 |
| ADAMTSL5       | -0.04 | 8.44E-01 | -0.13 | 5.04E-01 |
| CBX4           | -0.20 | 3.02E-01 | -0.13 | 5.04E-01 |
| CCZ1           | -0.01 | 9.42E-01 | -0.13 | 5.04E-01 |
| DDX18P1        | 0.04  | 8.43E-01 | -0.13 | 5.04E-01 |
| EXD2           | 0.05  | 8.08E-01 | -0.13 | 5.04E-01 |
| FAM150B        | 0.28  | 1.44E-01 | -0.13 | 5.04E-01 |
| FAS            | -0.01 | 9.66E-01 | -0.13 | 5.04E-01 |
| KLHDC9         | 0.17  | 3.84E-01 | -0.13 | 5.04E-01 |
| KRT33A         | -0.30 | 1.25E-01 | 0.13  | 5.04E-01 |
| LINC00969      | -0.01 | 9.43E-01 | -0.13 | 5.04E-01 |
| MMP2           | -0.18 | 3.69E-01 | 0.13  | 5.04E-01 |
| NUP50-AS1      | -0.14 | 4.77E-01 | -0.13 | 5.04E-01 |
| PAFAH1B1       | 0.05  | 8.14E-01 | -0.13 | 5.04E-01 |
| PCDHB8         | 0.18  | 3.58E-01 | -0.13 | 5.04E-01 |
| RP11-18M17.1   | -0.11 | 5.63E-01 | -0.13 | 5.04E-01 |
| RP11-216B9.9   | 0.09  | 6.53E-01 | -0.13 | 5.04E-01 |
| RP11-76C10.3   | 0.08  | 6.93E-01 | -0.13 | 5.04E-01 |
| RP11-802D6.1   | -0.25 | 1.93E-01 | 0.13  | 5.04E-01 |
| RP11-861A13.3  | 0.03  | 8.65E-01 | 0.13  | 5.04E-01 |
| RP11-977G19.11 | -0.13 | 5.17E-01 | 0.13  | 5.04E-01 |
| RP5-867C24.5   | 0.05  | 8.08E-01 | -0.13 | 5.04E-01 |
| SLC2A2         | -0.27 | 1.63E-01 | -0.13 | 5.04E-01 |

|               |       |          |       |          |
|---------------|-------|----------|-------|----------|
| TGFBR3L       | 0.21  | 2.93E-01 | 0.13  | 5.04E-01 |
| TSPO          | 0.12  | 5.56E-01 | 0.13  | 5.04E-01 |
| TUSC1         | 0.11  | 5.60E-01 | 0.13  | 5.04E-01 |
| AC006077.4    | -0.02 | 9.09E-01 | 0.13  | 5.05E-01 |
| ACOX2         | -0.25 | 2.05E-01 | -0.13 | 5.05E-01 |
| ACTG1P14      | 0.01  | 9.69E-01 | -0.13 | 5.05E-01 |
| ADAP2         | 0.16  | 4.29E-01 | 0.13  | 5.05E-01 |
| CYP2E1        | 0.13  | 5.10E-01 | 0.13  | 5.05E-01 |
| CYSLTR1       | -0.21 | 2.89E-01 | -0.13 | 5.05E-01 |
| FBN1          | -0.21 | 2.93E-01 | 0.13  | 5.05E-01 |
| G11279        | 0.23  | 2.35E-01 | 0.13  | 5.05E-01 |
| G35422        | 0.28  | 1.56E-01 | -0.13 | 5.05E-01 |
| HLA-DRB1      | 0.05  | 7.85E-01 | 0.13  | 5.05E-01 |
| HLA-F-AS1     | -0.12 | 5.49E-01 | 0.13  | 5.05E-01 |
| IGBP1         | -0.10 | 6.01E-01 | 0.13  | 5.05E-01 |
| LINC00598     | -0.30 | 1.20E-01 | 0.13  | 5.05E-01 |
| MCTP2         | -0.03 | 8.88E-01 | -0.13 | 5.05E-01 |
| MOXD1         | 0.21  | 2.89E-01 | 0.13  | 5.05E-01 |
| NCMAP         | -0.13 | 5.10E-01 | -0.13 | 5.05E-01 |
| NEK8          | -0.10 | 6.16E-01 | 0.13  | 5.05E-01 |
| OR2I1P        | -0.03 | 8.69E-01 | 0.13  | 5.05E-01 |
| RCBTB1        | -0.22 | 2.62E-01 | -0.13 | 5.05E-01 |
| RN7SL500P     | 0.02  | 9.34E-01 | 0.13  | 5.05E-01 |
| RP1-41C23.4   | -0.12 | 5.40E-01 | -0.13 | 5.05E-01 |
| RP11-394B2.5  | 0.07  | 7.12E-01 | -0.13 | 5.05E-01 |
| RP11-610J23.1 | 0.08  | 6.85E-01 | 0.13  | 5.05E-01 |
| SLC38A2       | 0.23  | 2.41E-01 | 0.13  | 5.05E-01 |
| VN1R83P       | -0.06 | 7.78E-01 | -0.13 | 5.05E-01 |
| XLOC_011151   | -0.15 | 4.58E-01 | 0.13  | 5.05E-01 |
| ZFP36L1       | -0.30 | 1.23E-01 | 0.13  | 5.05E-01 |
| ZYG11A        | -0.08 | 6.94E-01 | -0.13 | 5.05E-01 |
| AC007277.3    | -0.12 | 5.42E-01 | -0.13 | 5.06E-01 |
| AC007750.5    | -0.19 | 3.42E-01 | 0.13  | 5.06E-01 |
| AC012501.3    | -0.17 | 3.96E-01 | 0.13  | 5.06E-01 |
| ATP8B2        | -0.17 | 3.82E-01 | -0.13 | 5.06E-01 |
| BMF           | 0.02  | 9.10E-01 | 0.13  | 5.06E-01 |
| CDC42P5       | 0.02  | 9.39E-01 | 0.13  | 5.06E-01 |
| CPXM2         | -0.40 | 3.37E-02 | 0.13  | 5.06E-01 |
| CXorf56       | 0.19  | 3.28E-01 | -0.13 | 5.06E-01 |
| ENPP7P4       | -0.02 | 9.02E-01 | -0.13 | 5.06E-01 |
| EXOSC9        | 0.19  | 3.20E-01 | -0.13 | 5.06E-01 |
| HEBP2         | 0.02  | 9.32E-01 | -0.13 | 5.06E-01 |
| HMGB1P19      | -0.08 | 6.82E-01 | -0.13 | 5.06E-01 |
| NDUFS8        | 0.19  | 3.44E-01 | 0.13  | 5.06E-01 |
| NLGN3         | -0.27 | 1.69E-01 | -0.13 | 5.06E-01 |
| PROZ          | 0.19  | 3.31E-01 | -0.13 | 5.06E-01 |
| RP1-140J1.4   | -0.13 | 4.95E-01 | -0.13 | 5.06E-01 |

|                      |       |          |       |          |
|----------------------|-------|----------|-------|----------|
| <b>RP11-285G1.9</b>  | 0.03  | 8.70E-01 | -0.13 | 5.06E-01 |
| <b>RP11-849I19.2</b> | 0.08  | 6.92E-01 | -0.13 | 5.06E-01 |
| <b>RP4-734G22.3</b>  | -0.09 | 6.46E-01 | -0.13 | 5.06E-01 |
| <b>SCGB1B2P</b>      | -0.43 | 2.34E-02 | -0.13 | 5.06E-01 |
| <b>SETMAR</b>        | -0.05 | 8.07E-01 | -0.13 | 5.06E-01 |
| <b>SF3B2</b>         | 0.14  | 4.73E-01 | -0.13 | 5.06E-01 |
| <b>TACC2</b>         | -0.08 | 6.84E-01 | -0.13 | 5.06E-01 |
| <b>TIMM21</b>        | 0.06  | 7.60E-01 | -0.13 | 5.06E-01 |
| <b>TIMP2</b>         | -0.18 | 3.67E-01 | 0.13  | 5.06E-01 |
| <b>TMEM257</b>       | -0.19 | 3.30E-01 | -0.13 | 5.06E-01 |
| <b>Z97634.3</b>      | -0.28 | 1.51E-01 | -0.13 | 5.06E-01 |
| <b>CLEC4E</b>        | 0.18  | 3.57E-01 | 0.13  | 5.07E-01 |
| <b>CTD-2302E22.4</b> | -0.21 | 2.86E-01 | 0.13  | 5.07E-01 |
| <b>CYLD</b>          | 0.15  | 4.39E-01 | 0.13  | 5.07E-01 |
| <b>DDX10</b>         | 0.12  | 5.50E-01 | 0.13  | 5.07E-01 |
| <b>KRT81</b>         | -0.08 | 6.74E-01 | 0.13  | 5.07E-01 |
| <b>PDGFA</b>         | -0.13 | 5.26E-01 | 0.13  | 5.07E-01 |
| <b>RP11-755F10.1</b> | -0.15 | 4.41E-01 | 0.13  | 5.07E-01 |
| <b>AC018804.6</b>    | 0.06  | 7.49E-01 | -0.13 | 5.07E-01 |
| <b>AL132709.8</b>    | -0.05 | 8.12E-01 | -0.13 | 5.07E-01 |
| <b>CTD-3088G3.8</b>  | -0.21 | 2.81E-01 | -0.13 | 5.07E-01 |
| <b>DIMT1</b>         | 0.36  | 6.35E-02 | -0.13 | 5.07E-01 |
| <b>GTPBP10</b>       | 0.07  | 7.22E-01 | -0.13 | 5.07E-01 |
| <b>HNRNPH1</b>       | -0.05 | 7.91E-01 | -0.13 | 5.07E-01 |
| <b>KRT128P</b>       | -0.19 | 3.26E-01 | -0.13 | 5.07E-01 |
| <b>LRRC17</b>        | -0.24 | 2.27E-01 | -0.13 | 5.07E-01 |
| <b>RAB2A</b>         | 0.15  | 4.43E-01 | -0.13 | 5.07E-01 |
| <b>RP11-268J15.5</b> | 0.05  | 8.00E-01 | -0.13 | 5.07E-01 |
| <b>RP11-560O20.1</b> | 0.07  | 7.13E-01 | -0.13 | 5.07E-01 |
| <b>RP11-60A14.1</b>  | -0.30 | 1.15E-01 | -0.13 | 5.07E-01 |
| <b>RPS15AP10</b>     | -0.15 | 4.50E-01 | -0.13 | 5.07E-01 |
| <b>ACTR3</b>         | 0.19  | 3.37E-01 | -0.13 | 5.08E-01 |
| <b>AFMID</b>         | 0.03  | 8.78E-01 | 0.13  | 5.08E-01 |
| <b>BMS1P8</b>        | 0.05  | 8.18E-01 | 0.13  | 5.08E-01 |
| <b>CA5BP1</b>        | -0.08 | 6.89E-01 | -0.13 | 5.08E-01 |
| <b>CCL21</b>         | -0.06 | 7.53E-01 | 0.13  | 5.08E-01 |
| <b>CTD-2095E4.3</b>  | -0.20 | 3.02E-01 | 0.13  | 5.08E-01 |
| <b>CTD-2302E22.6</b> | 0.06  | 7.72E-01 | 0.13  | 5.08E-01 |
| <b>CTD-2357A8.2</b>  | -0.10 | 6.26E-01 | 0.13  | 5.08E-01 |
| <b>DUSP8</b>         | 0.36  | 6.24E-02 | 0.13  | 5.08E-01 |
| <b>ERICH1-AS1</b>    | 0.17  | 3.74E-01 | 0.13  | 5.08E-01 |
| <b>F2R</b>           | -0.26 | 1.84E-01 | -0.13 | 5.08E-01 |
| <b>FAM25A</b>        | 0.27  | 1.63E-01 | 0.13  | 5.08E-01 |
| <b>G41064</b>        | -0.21 | 2.91E-01 | -0.13 | 5.08E-01 |
| <b>HCK</b>           | 0.26  | 1.88E-01 | 0.13  | 5.08E-01 |
| <b>KB-1836B5.4</b>   | -0.17 | 3.91E-01 | 0.13  | 5.08E-01 |
| <b>KLK6</b>          | 0.22  | 2.51E-01 | 0.13  | 5.08E-01 |

|               |       |          |       |          |
|---------------|-------|----------|-------|----------|
| L1TD1         | -0.22 | 2.57E-01 | 0.13  | 5.08E-01 |
| LAD1          | 0.28  | 1.50E-01 | 0.13  | 5.08E-01 |
| MIR1296       | 0.32  | 9.53E-02 | -0.13 | 5.08E-01 |
| MIR181B2      | 0.01  | 9.70E-01 | -0.13 | 5.08E-01 |
| NABP2         | -0.04 | 8.53E-01 | 0.13  | 5.08E-01 |
| PCGF1         | -0.04 | 8.23E-01 | 0.13  | 5.08E-01 |
| RASEF         | -0.03 | 8.80E-01 | -0.13 | 5.08E-01 |
| RBM22         | 0.31  | 1.08E-01 | 0.13  | 5.08E-01 |
| RHBDD1        | 0.25  | 1.96E-01 | 0.13  | 5.08E-01 |
| RNY4P19       | -0.23 | 2.43E-01 | 0.13  | 5.08E-01 |
| RP11-197N18.8 | -0.27 | 1.63E-01 | -0.13 | 5.08E-01 |
| RP11-413M3.4  | 0.02  | 9.39E-01 | -0.13 | 5.08E-01 |
| RP11-429G19.3 | 0.19  | 3.35E-01 | 0.13  | 5.08E-01 |
| RP11-798G7.6  | -0.04 | 8.49E-01 | -0.13 | 5.08E-01 |
| RP13-578N3.3  | -0.16 | 4.20E-01 | 0.13  | 5.08E-01 |
| RPL39P26      | 0.04  | 8.54E-01 | -0.13 | 5.08E-01 |
| SIRPB2        | 0.10  | 6.06E-01 | 0.13  | 5.08E-01 |
| SLC33A1       | 0.04  | 8.39E-01 | -0.13 | 5.08E-01 |
| SMO           | -0.07 | 7.16E-01 | -0.13 | 5.08E-01 |
| SNORD69       | 0.23  | 2.48E-01 | -0.13 | 5.08E-01 |
| SYNJ2         | 0.00  | 9.94E-01 | 0.13  | 5.08E-01 |
| TP53INP1      | 0.35  | 6.82E-02 | 0.13  | 5.08E-01 |
| XLOC_005332   | -0.26 | 1.81E-01 | -0.13 | 5.08E-01 |
| ZNF366        | 0.30  | 1.18E-01 | 0.13  | 5.08E-01 |
| AF127936.7    | 0.45  | 1.51E-02 | 0.13  | 5.09E-01 |
| C15ORF31      | -0.15 | 4.47E-01 | 0.13  | 5.09E-01 |
| HIST1H2BC     | -0.11 | 5.70E-01 | 0.13  | 5.09E-01 |
| MIR4677       | -0.02 | 9.32E-01 | 0.13  | 5.09E-01 |
| RP11-349F21.2 | 0.12  | 5.37E-01 | 0.13  | 5.09E-01 |
| RP11-367B6.2  | 0.12  | 5.54E-01 | 0.13  | 5.09E-01 |
| RP11-670E13.3 | -0.11 | 5.68E-01 | 0.13  | 5.09E-01 |
| SNX9          | 0.11  | 5.73E-01 | 0.13  | 5.09E-01 |
| SPDYE21P      | -0.12 | 5.46E-01 | 0.13  | 5.09E-01 |
| ANKRD36C      | -0.45 | 1.53E-02 | -0.13 | 5.09E-01 |
| ATE1          | 0.18  | 3.72E-01 | -0.13 | 5.09E-01 |
| ATP6V0CP1     | -0.03 | 8.87E-01 | -0.13 | 5.09E-01 |
| DDX11L10      | -0.20 | 3.17E-01 | -0.13 | 5.09E-01 |
| FSIP2         | -0.27 | 1.68E-01 | -0.13 | 5.09E-01 |
| G12891        | -0.23 | 2.47E-01 | -0.13 | 5.09E-01 |
| PFN1P8        | -0.04 | 8.30E-01 | -0.13 | 5.09E-01 |
| PGAP1         | -0.03 | 8.87E-01 | -0.13 | 5.09E-01 |
| RN7SKP180     | 0.13  | 4.95E-01 | -0.13 | 5.09E-01 |
| RP11-677N16.1 | 0.05  | 7.91E-01 | -0.13 | 5.09E-01 |
| RP3-323N1.2   | -0.12 | 5.45E-01 | -0.13 | 5.09E-01 |
| RP5-991G20.1  | 0.04  | 8.32E-01 | -0.13 | 5.09E-01 |
| SCN2B         | 0.44  | 1.89E-02 | -0.13 | 5.09E-01 |
| ST7-AS2       | -0.11 | 5.81E-01 | -0.13 | 5.09E-01 |

|                  |       |          |       |          |
|------------------|-------|----------|-------|----------|
| TRAPPC8          | 0.06  | 7.60E-01 | -0.13 | 5.09E-01 |
| TUSC3            | 0.13  | 5.04E-01 | -0.13 | 5.09E-01 |
| XPO1             | 0.02  | 9.28E-01 | -0.13 | 5.09E-01 |
| ZNF652           | -0.28 | 1.42E-01 | -0.13 | 5.09E-01 |
| ATP5G2           | 0.00  | 9.82E-01 | 0.13  | 5.10E-01 |
| BAK1P1           | 0.23  | 2.47E-01 | 0.13  | 5.10E-01 |
| DNAH9            | 0.05  | 8.03E-01 | 0.13  | 5.10E-01 |
| DPYSL4           | 0.03  | 8.64E-01 | 0.13  | 5.10E-01 |
| FAM46B           | 0.02  | 9.27E-01 | 0.13  | 5.10E-01 |
| MAP4K1           | 0.18  | 3.65E-01 | 0.13  | 5.10E-01 |
| MIR579           | -0.11 | 5.68E-01 | 0.13  | 5.10E-01 |
| PIGC             | 0.09  | 6.40E-01 | 0.13  | 5.10E-01 |
| PTPRE            | 0.45  | 1.52E-02 | 0.13  | 5.10E-01 |
| RP11-112L18.1    | -0.24 | 2.09E-01 | 0.13  | 5.10E-01 |
| RP11-632C17__A.1 | 0.08  | 6.84E-01 | 0.13  | 5.10E-01 |
| RP11-667F14.1    | -0.02 | 9.08E-01 | 0.13  | 5.10E-01 |
| RP11-94C24.6     | -0.23 | 2.40E-01 | 0.13  | 5.10E-01 |
| RP5-1007F24.1    | -0.08 | 6.92E-01 | 0.13  | 5.10E-01 |
| SERPINB1         | 0.13  | 5.07E-01 | 0.13  | 5.10E-01 |
| SLC31A2          | -0.05 | 7.89E-01 | 0.13  | 5.10E-01 |
| SLC50A1          | -0.17 | 3.98E-01 | 0.13  | 5.10E-01 |
| TRAPPC2L         | -0.13 | 5.20E-01 | 0.13  | 5.10E-01 |
| ADAMTS9-AS2      | 0.02  | 9.36E-01 | -0.13 | 5.10E-01 |
| HDX              | -0.22 | 2.58E-01 | -0.13 | 5.10E-01 |
| HOXB-AS2         | 0.01  | 9.50E-01 | -0.13 | 5.10E-01 |
| LRAT             | -0.57 | 1.66E-03 | -0.13 | 5.10E-01 |
| RAB5CP1          | -0.03 | 8.75E-01 | -0.13 | 5.10E-01 |
| RN7SL192P        | -0.08 | 6.85E-01 | -0.13 | 5.10E-01 |
| RP11-191L9.4     | -0.21 | 2.78E-01 | -0.13 | 5.10E-01 |
| RP11-727F15.9    | -0.10 | 5.98E-01 | -0.13 | 5.10E-01 |
| SLC7A14          | 0.10  | 5.99E-01 | -0.13 | 5.10E-01 |
| TAF7             | -0.08 | 6.69E-01 | -0.13 | 5.10E-01 |
| TRPC5            | 0.04  | 8.31E-01 | -0.13 | 5.10E-01 |
| CEND1            | -0.27 | 1.58E-01 | -0.13 | 5.11E-01 |
| COL9A1           | -0.19 | 3.41E-01 | -0.13 | 5.11E-01 |
| CPNE8            | -0.25 | 2.05E-01 | -0.13 | 5.11E-01 |
| CTD-2540F13.2    | 0.06  | 7.75E-01 | -0.13 | 5.11E-01 |
| DDX21            | 0.14  | 4.88E-01 | -0.13 | 5.11E-01 |
| GLYATL1P1        | 0.02  | 9.05E-01 | -0.13 | 5.11E-01 |
| HERC2P9          | -0.25 | 1.98E-01 | -0.13 | 5.11E-01 |
| MIR3192          | 0.13  | 4.99E-01 | -0.13 | 5.11E-01 |
| NDUFAF7          | 0.12  | 5.44E-01 | -0.13 | 5.11E-01 |
| NUTM2A           | -0.30 | 1.18E-01 | -0.13 | 5.11E-01 |
| OR7E11P          | -0.10 | 6.30E-01 | -0.13 | 5.11E-01 |
| RP11-42O15.3     | -0.05 | 8.14E-01 | -0.13 | 5.11E-01 |
| RP11-484O2.1     | -0.13 | 5.01E-01 | -0.13 | 5.11E-01 |
| RP11-525G13.2    | -0.21 | 2.85E-01 | -0.13 | 5.11E-01 |

|                       |       |          |       |          |
|-----------------------|-------|----------|-------|----------|
| <b>RP11-797H7.5</b>   | -0.08 | 7.00E-01 | -0.13 | 5.11E-01 |
| <b>SPINK4</b>         | 0.03  | 8.86E-01 | -0.13 | 5.11E-01 |
| <b>STX18</b>          | 0.02  | 9.08E-01 | -0.13 | 5.11E-01 |
| <b>TET1</b>           | -0.01 | 9.79E-01 | -0.13 | 5.11E-01 |
| <b>TLL2</b>           | -0.02 | 9.08E-01 | -0.13 | 5.11E-01 |
| <b>ATG4D</b>          | 0.20  | 3.05E-01 | 0.13  | 5.11E-01 |
| <b>CTD-2314G24.2</b>  | -0.18 | 3.63E-01 | 0.13  | 5.11E-01 |
| <b>KCTD10</b>         | 0.22  | 2.66E-01 | 0.13  | 5.11E-01 |
| <b>LRRK1</b>          | -0.07 | 7.31E-01 | 0.13  | 5.11E-01 |
| <b>NXPE4</b>          | -0.17 | 3.90E-01 | 0.13  | 5.11E-01 |
| <b>RP11-667M19.4</b>  | 0.16  | 4.15E-01 | 0.13  | 5.11E-01 |
| <b>RP13-188A5.1</b>   | 0.34  | 8.00E-02 | 0.13  | 5.11E-01 |
| <b>RPS11P6</b>        | 0.44  | 1.80E-02 | 0.13  | 5.11E-01 |
| <b>SAP130</b>         | -0.13 | 5.24E-01 | 0.13  | 5.11E-01 |
| <b>SH2D3A</b>         | 0.19  | 3.37E-01 | 0.13  | 5.11E-01 |
| <b>TMEM253</b>        | -0.06 | 7.63E-01 | 0.13  | 5.11E-01 |
| <b>ZNF69</b>          | -0.16 | 4.20E-01 | 0.13  | 5.11E-01 |
| <b>ANKDD1A</b>        | -0.11 | 5.79E-01 | 0.13  | 5.12E-01 |
| <b>C7orf50</b>        | 0.03  | 8.65E-01 | -0.13 | 5.12E-01 |
| <b>CALML6</b>         | 0.26  | 1.82E-01 | 0.13  | 5.12E-01 |
| <b>CD300A</b>         | 0.18  | 3.62E-01 | 0.13  | 5.12E-01 |
| <b>CDA</b>            | 0.08  | 6.78E-01 | 0.13  | 5.12E-01 |
| <b>CTD-2256P15.2</b>  | 0.00  | 9.81E-01 | 0.13  | 5.12E-01 |
| <b>KDM4B</b>          | 0.03  | 8.91E-01 | -0.13 | 5.12E-01 |
| <b>KRT26</b>          | -0.15 | 4.45E-01 | 0.13  | 5.12E-01 |
| <b>LINC00115</b>      | -0.08 | 6.77E-01 | -0.13 | 5.12E-01 |
| <b>NDUFA6-AS1</b>     | 0.05  | 8.13E-01 | -0.13 | 5.12E-01 |
| <b>OR7E83P</b>        | -0.10 | 6.11E-01 | -0.13 | 5.12E-01 |
| <b>RNU4-25P</b>       | -0.12 | 5.49E-01 | 0.13  | 5.12E-01 |
| <b>RP11-1017G21.4</b> | -0.05 | 8.01E-01 | 0.13  | 5.12E-01 |
| <b>RP11-115D19.3</b>  | -0.15 | 4.43E-01 | -0.13 | 5.12E-01 |
| <b>RP11-20I23.13</b>  | -0.26 | 1.79E-01 | -0.13 | 5.12E-01 |
| <b>RP11-345J18.2</b>  | -0.09 | 6.67E-01 | -0.13 | 5.12E-01 |
| <b>RP11-429J17.5</b>  | -0.09 | 6.45E-01 | -0.13 | 5.12E-01 |
| <b>RP13-735L24.1</b>  | -0.40 | 3.32E-02 | -0.13 | 5.12E-01 |
| <b>SH3D19</b>         | -0.10 | 6.16E-01 | -0.13 | 5.12E-01 |
| <b>SREK1IP1</b>       | 0.04  | 8.48E-01 | 0.13  | 5.12E-01 |
| <b>TMEM191B</b>       | -0.09 | 6.49E-01 | 0.13  | 5.12E-01 |
| <b>TMEM258</b>        | -0.13 | 5.09E-01 | 0.13  | 5.12E-01 |
| <b>TSSC1</b>          | 0.39  | 3.98E-02 | 0.13  | 5.12E-01 |
| <b>WTAP</b>           | 0.25  | 1.93E-01 | 0.13  | 5.12E-01 |
| <b>BCL11B</b>         | 0.03  | 8.80E-01 | 0.13  | 5.13E-01 |
| <b>HIST1H4H</b>       | -0.09 | 6.44E-01 | 0.13  | 5.13E-01 |
| <b>ID2</b>            | 0.08  | 6.69E-01 | 0.13  | 5.13E-01 |
| <b>LGALS7</b>         | 0.11  | 5.89E-01 | 0.13  | 5.13E-01 |
| <b>MAMLD1</b>         | -0.08 | 7.02E-01 | 0.13  | 5.13E-01 |
| <b>MPDU1</b>          | 0.26  | 1.78E-01 | 0.13  | 5.13E-01 |

|                      |       |          |       |          |
|----------------------|-------|----------|-------|----------|
| <b>NMB</b>           | 0.06  | 7.69E-01 | 0.13  | 5.13E-01 |
| <b>NUBP1</b>         | 0.18  | 3.58E-01 | 0.13  | 5.13E-01 |
| <b>PGLYRP2</b>       | 0.22  | 2.70E-01 | 0.13  | 5.13E-01 |
| <b>RNU6-936P</b>     | 0.05  | 7.99E-01 | 0.13  | 5.13E-01 |
| <b>RP11-363J20.1</b> | 0.32  | 9.47E-02 | 0.13  | 5.13E-01 |
| <b>RP11-96O20.5</b>  | 0.10  | 6.15E-01 | 0.13  | 5.13E-01 |
| <b>SEMA6A</b>        | -0.12 | 5.46E-01 | 0.13  | 5.13E-01 |
| <b>SNORD45</b>       | -0.33 | 8.51E-02 | 0.13  | 5.13E-01 |
| <b>TTC38</b>         | 0.27  | 1.60E-01 | 0.13  | 5.13E-01 |
| <b>UBE2R2</b>        | 0.03  | 8.70E-01 | 0.13  | 5.13E-01 |
| <b>CTD-2318O12.1</b> | -0.06 | 7.58E-01 | -0.13 | 5.13E-01 |
| <b>ENPP5</b>         | -0.22 | 2.65E-01 | -0.13 | 5.13E-01 |
| <b>GPAT2</b>         | 0.27  | 1.69E-01 | -0.13 | 5.13E-01 |
| <b>MIR2052HG</b>     | 0.00  | 9.96E-01 | -0.13 | 5.13E-01 |
| <b>NCOA1</b>         | -0.04 | 8.54E-01 | -0.13 | 5.13E-01 |
| <b>OR8R1P</b>        | 0.12  | 5.30E-01 | -0.13 | 5.13E-01 |
| <b>PKD1P5</b>        | -0.16 | 4.30E-01 | -0.13 | 5.13E-01 |
| <b>PNPLA8</b>        | 0.14  | 4.87E-01 | -0.13 | 5.13E-01 |
| <b>RAB11FIP1P1</b>   | -0.16 | 4.17E-01 | -0.13 | 5.13E-01 |
| <b>RP1-292L20.3</b>  | -0.16 | 4.23E-01 | -0.13 | 5.13E-01 |
| <b>RP11-178L8.7</b>  | 0.19  | 3.44E-01 | -0.13 | 5.13E-01 |
| <b>RP11-488C13.6</b> | -0.14 | 4.68E-01 | -0.13 | 5.13E-01 |
| <b>RP3-415N12.1</b>  | 0.26  | 1.76E-01 | -0.13 | 5.13E-01 |
| <b>SRRM2</b>         | -0.07 | 7.39E-01 | -0.13 | 5.13E-01 |
| <b>ZNF629</b>        | -0.01 | 9.54E-01 | -0.13 | 5.13E-01 |
| <b>AOC1</b>          | 0.07  | 7.22E-01 | -0.13 | 5.14E-01 |
| <b>CDC42P1</b>       | 0.12  | 5.37E-01 | -0.13 | 5.14E-01 |
| <b>G28650</b>        | -0.16 | 4.21E-01 | -0.13 | 5.14E-01 |
| <b>PIGB</b>          | 0.16  | 4.29E-01 | -0.13 | 5.14E-01 |
| <b>RNF157</b>        | 0.24  | 2.23E-01 | -0.13 | 5.14E-01 |
| <b>RP11-399C16.3</b> | 0.04  | 8.24E-01 | -0.13 | 5.14E-01 |
| <b>RP11-557C18.3</b> | -0.01 | 9.46E-01 | -0.13 | 5.14E-01 |
| <b>RP11-872J21.5</b> | -0.04 | 8.27E-01 | -0.13 | 5.14E-01 |
| <b>RP3-398G3.5</b>   | -0.32 | 9.59E-02 | -0.13 | 5.14E-01 |
| <b>RP5-1139B12.2</b> | 0.04  | 8.32E-01 | -0.13 | 5.14E-01 |
| <b>SDHCP3</b>        | 0.22  | 2.56E-01 | -0.13 | 5.14E-01 |
| <b>TMED6</b>         | 0.16  | 4.24E-01 | -0.13 | 5.14E-01 |
| <b>WDR11</b>         | 0.13  | 5.06E-01 | -0.13 | 5.14E-01 |
| <b>AC074212.6</b>    | 0.08  | 6.84E-01 | 0.13  | 5.14E-01 |
| <b>BRK1</b>          | 0.06  | 7.55E-01 | 0.13  | 5.14E-01 |
| <b>CD177</b>         | 0.18  | 3.56E-01 | 0.13  | 5.14E-01 |
| <b>CHRNB1</b>        | 0.07  | 7.12E-01 | 0.13  | 5.14E-01 |
| <b>CTDNBP1</b>       | -0.14 | 4.87E-01 | 0.13  | 5.14E-01 |
| <b>CYP4F11</b>       | 0.13  | 5.19E-01 | 0.13  | 5.14E-01 |
| <b>F12</b>           | 0.26  | 1.80E-01 | 0.13  | 5.14E-01 |
| <b>FOXI2</b>         | -0.27 | 1.63E-01 | 0.13  | 5.14E-01 |
| <b>JMJD6</b>         | 0.29  | 1.34E-01 | 0.13  | 5.14E-01 |

|               |       |          |       |          |
|---------------|-------|----------|-------|----------|
| LINS1         | 0.01  | 9.77E-01 | 0.13  | 5.14E-01 |
| MIR25         | -0.37 | 5.42E-02 | 0.13  | 5.14E-01 |
| MTCO2P2       | -0.01 | 9.77E-01 | 0.13  | 5.14E-01 |
| NT5C3B        | -0.05 | 8.02E-01 | 0.13  | 5.14E-01 |
| PKD1L2        | -0.05 | 7.88E-01 | 0.13  | 5.14E-01 |
| RNA5SP256     | 0.05  | 8.12E-01 | 0.13  | 5.14E-01 |
| ZMYM5         | 0.22  | 2.58E-01 | 0.13  | 5.14E-01 |
| ZNF32         | 0.18  | 3.54E-01 | 0.13  | 5.14E-01 |
| AC004053.1    | -0.19 | 3.24E-01 | -0.13 | 5.15E-01 |
| AF064858.8    | -0.16 | 4.09E-01 | -0.13 | 5.15E-01 |
| CCDC129       | 0.12  | 5.53E-01 | -0.13 | 5.15E-01 |
| CH507-42P11.3 | -0.10 | 6.29E-01 | 0.13  | 5.15E-01 |
| CTC-321K16.1  | -0.24 | 2.09E-01 | -0.13 | 5.15E-01 |
| CTD-2015B23.2 | -0.23 | 2.29E-01 | 0.13  | 5.15E-01 |
| EFHD1         | -0.04 | 8.39E-01 | 0.13  | 5.15E-01 |
| ERGIC1        | 0.05  | 8.04E-01 | 0.13  | 5.15E-01 |
| FAM103A2P     | -0.04 | 8.48E-01 | 0.13  | 5.15E-01 |
| FAM135B       | 0.04  | 8.48E-01 | 0.13  | 5.15E-01 |
| KCTD6         | 0.05  | 7.91E-01 | -0.13 | 5.15E-01 |
| PDZD4         | 0.16  | 4.30E-01 | 0.13  | 5.15E-01 |
| PRKAR1B       | 0.43  | 2.21E-02 | 0.13  | 5.15E-01 |
| RNU6-875P     | -0.05 | 7.85E-01 | -0.13 | 5.15E-01 |
| RP11-248J18.3 | -0.11 | 5.63E-01 | -0.13 | 5.15E-01 |
| RP11-314N13.3 | -0.25 | 2.05E-01 | -0.13 | 5.15E-01 |
| RP11-465B22.8 | -0.21 | 2.82E-01 | -0.13 | 5.15E-01 |
| RP11-676M6.1  | 0.21  | 2.95E-01 | 0.13  | 5.15E-01 |
| RP11-700H6.4  | 0.19  | 3.43E-01 | 0.13  | 5.15E-01 |
| RP11-7908.1   | -0.23 | 2.47E-01 | -0.13 | 5.15E-01 |
| RP11-958N24.1 | -0.21 | 2.83E-01 | -0.13 | 5.15E-01 |
| SERPINF1      | 0.09  | 6.33E-01 | 0.13  | 5.15E-01 |
| SLC25A24      | 0.16  | 4.20E-01 | -0.13 | 5.15E-01 |
| SMC3          | -0.04 | 8.22E-01 | -0.13 | 5.15E-01 |
| TAF1          | -0.19 | 3.45E-01 | -0.13 | 5.15E-01 |
| TMEM147-AS1   | -0.10 | 5.96E-01 | -0.13 | 5.15E-01 |
| UBE2L5P       | -0.09 | 6.66E-01 | 0.13  | 5.15E-01 |
| ZNF702P       | 0.00  | 9.96E-01 | -0.13 | 5.15E-01 |
| ABLIM2        | -0.22 | 2.52E-01 | 0.13  | 5.16E-01 |
| AC013429.5    | -0.09 | 6.52E-01 | -0.13 | 5.16E-01 |
| CHP1          | 0.32  | 1.01E-01 | 0.13  | 5.16E-01 |
| CSE1L         | 0.07  | 7.19E-01 | -0.13 | 5.16E-01 |
| CTD-3220F14.2 | 0.08  | 7.00E-01 | -0.13 | 5.16E-01 |
| LINC00412     | -0.16 | 4.04E-01 | -0.13 | 5.16E-01 |
| LINC01353     | 0.35  | 7.08E-02 | -0.13 | 5.16E-01 |
| PNN           | -0.06 | 7.62E-01 | -0.13 | 5.16E-01 |
| PPP5C         | -0.03 | 8.73E-01 | -0.13 | 5.16E-01 |
| RBKS          | -0.02 | 9.06E-01 | 0.13  | 5.16E-01 |
| RN7SL864P     | -0.07 | 7.31E-01 | 0.13  | 5.16E-01 |



|               |       |          |       |          |
|---------------|-------|----------|-------|----------|
| RP1-60N8.1    | -0.05 | 8.00E-01 | -0.13 | 5.16E-01 |
| RP11-680L20.1 | -0.04 | 8.27E-01 | 0.13  | 5.16E-01 |
| RP11-84D1.2   | 0.26  | 1.77E-01 | 0.13  | 5.16E-01 |
| RP4-568F9.6   | -0.04 | 8.38E-01 | -0.13 | 5.16E-01 |
| RP5-1101C3.1  | -0.23 | 2.45E-01 | 0.13  | 5.16E-01 |
| RRNAD1        | -0.03 | 8.69E-01 | 0.13  | 5.16E-01 |
| SORCS3        | -0.21 | 2.83E-01 | 0.13  | 5.16E-01 |
| SRSF3         | 0.11  | 5.92E-01 | -0.13 | 5.16E-01 |
| TPD52L2       | 0.16  | 4.04E-01 | 0.13  | 5.16E-01 |
| VEZT          | 0.06  | 7.75E-01 | 0.13  | 5.16E-01 |
| AC005534.8    | -0.24 | 2.16E-01 | 0.13  | 5.17E-01 |
| CTD-2236F14.1 | 0.39  | 4.28E-02 | 0.13  | 5.17E-01 |
| CTHRC1        | -0.04 | 8.24E-01 | 0.13  | 5.17E-01 |
| EBP           | 0.18  | 3.71E-01 | 0.13  | 5.17E-01 |
| FAM41C        | 0.39  | 3.98E-02 | -0.13 | 5.17E-01 |
| G32993        | 0.01  | 9.68E-01 | -0.13 | 5.17E-01 |
| GZMB          | 0.20  | 2.96E-01 | 0.13  | 5.17E-01 |
| MAST1         | 0.02  | 9.21E-01 | -0.13 | 5.17E-01 |
| MCM4          | 0.10  | 6.03E-01 | -0.13 | 5.17E-01 |
| MEIS2         | -0.09 | 6.54E-01 | 0.13  | 5.17E-01 |
| PAFAH2        | 0.09  | 6.62E-01 | 0.13  | 5.17E-01 |
| POLR2L        | 0.11  | 5.86E-01 | 0.13  | 5.17E-01 |
| RP11-147G7.3  | -0.06 | 7.77E-01 | -0.13 | 5.17E-01 |
| RP11-334C17.5 | -0.09 | 6.32E-01 | 0.13  | 5.17E-01 |
| RP11-532M24.1 | -0.20 | 3.15E-01 | -0.13 | 5.17E-01 |
| RP11-54G14.1  | 0.10  | 6.12E-01 | 0.13  | 5.17E-01 |
| RP11-557J10.3 | -0.07 | 7.30E-01 | -0.13 | 5.17E-01 |
| RPL23AP81     | 0.09  | 6.45E-01 | -0.13 | 5.17E-01 |
| RPS14P8       | -0.29 | 1.31E-01 | -0.13 | 5.17E-01 |
| RPS6KA1       | 0.21  | 2.75E-01 | 0.13  | 5.17E-01 |
| RRAGC         | 0.06  | 7.46E-01 | 0.13  | 5.17E-01 |
| TCTE1         | 0.04  | 8.41E-01 | -0.13 | 5.17E-01 |
| TLR7          | 0.02  | 9.03E-01 | 0.13  | 5.17E-01 |
| TMEM18        | 0.09  | 6.55E-01 | -0.13 | 5.17E-01 |
| TTI1          | -0.04 | 8.49E-01 | 0.13  | 5.17E-01 |
| USO1          | -0.02 | 9.16E-01 | -0.13 | 5.17E-01 |
| G35954        | -0.03 | 8.68E-01 | -0.13 | 5.18E-01 |
| LINC00667     | 0.07  | 7.24E-01 | -0.13 | 5.18E-01 |
| METTL24       | -0.31 | 1.03E-01 | -0.13 | 5.18E-01 |
| RN7SL413P     | -0.16 | 4.04E-01 | -0.13 | 5.18E-01 |
| RP11-231E4.5  | 0.00  | 9.85E-01 | -0.13 | 5.18E-01 |
| RP11-319E16.2 | -0.05 | 7.95E-01 | -0.13 | 5.18E-01 |
| RP11-347I19.7 | 0.05  | 8.13E-01 | -0.13 | 5.18E-01 |
| RP11-426J5.1  | -0.06 | 7.53E-01 | -0.13 | 5.18E-01 |
| RP11-742D12.2 | -0.24 | 2.09E-01 | -0.13 | 5.18E-01 |
| RP11-74D7.1   | 0.08  | 7.03E-01 | -0.13 | 5.18E-01 |
| RP4-669P10.19 | -0.24 | 2.14E-01 | -0.13 | 5.18E-01 |

|                       |       |          |       |          |
|-----------------------|-------|----------|-------|----------|
| <b>RP4-704D21.2</b>   | -0.01 | 9.67E-01 | -0.13 | 5.18E-01 |
| <b>RSPH4A</b>         | -0.10 | 5.99E-01 | -0.13 | 5.18E-01 |
| <b>SDC2</b>           | -0.35 | 7.01E-02 | -0.13 | 5.18E-01 |
| <b>SGPL1</b>          | 0.16  | 4.30E-01 | -0.13 | 5.18E-01 |
| <b>SSB</b>            | -0.01 | 9.72E-01 | -0.13 | 5.18E-01 |
| <b>CD226</b>          | 0.24  | 2.13E-01 | 0.13  | 5.18E-01 |
| <b>CEBPA-AS1</b>      | -0.16 | 4.27E-01 | 0.13  | 5.18E-01 |
| <b>HOXD9</b>          | -0.13 | 5.06E-01 | 0.13  | 5.18E-01 |
| <b>ISCA2</b>          | 0.21  | 2.82E-01 | 0.13  | 5.18E-01 |
| <b>NELFA</b>          | 0.39  | 4.26E-02 | 0.13  | 5.18E-01 |
| <b>OXCT1-AS1</b>      | 0.08  | 6.70E-01 | 0.13  | 5.18E-01 |
| <b>PIAS4</b>          | 0.08  | 7.00E-01 | 0.13  | 5.18E-01 |
| <b>PODXL</b>          | -0.25 | 1.91E-01 | 0.13  | 5.18E-01 |
| <b>PRF1</b>           | 0.28  | 1.46E-01 | 0.13  | 5.18E-01 |
| <b>PRUNE2</b>         | -0.29 | 1.30E-01 | 0.13  | 5.18E-01 |
| <b>RN7SL239P</b>      | -0.20 | 3.00E-01 | 0.13  | 5.18E-01 |
| <b>RP11-285F7.2</b>   | 0.11  | 5.82E-01 | 0.13  | 5.18E-01 |
| <b>RP11-428L9.2</b>   | -0.02 | 9.00E-01 | 0.13  | 5.18E-01 |
| <b>RP11-796E2.4</b>   | 0.14  | 4.79E-01 | 0.13  | 5.18E-01 |
| <b>RP11-95I16.4</b>   | 0.00  | 9.83E-01 | 0.13  | 5.18E-01 |
| <b>TARSL2</b>         | 0.11  | 5.87E-01 | 0.13  | 5.18E-01 |
| <b>TOMM22P2</b>       | 0.36  | 5.84E-02 | 0.13  | 5.18E-01 |
| <b>TVP23CP2</b>       | -0.02 | 9.35E-01 | 0.13  | 5.18E-01 |
| <b>USHBP1</b>         | 0.18  | 3.49E-01 | 0.13  | 5.18E-01 |
| <b>AC017101.10</b>    | -0.32 | 9.93E-02 | -0.13 | 5.19E-01 |
| <b>AC110299.5</b>     | -0.11 | 5.76E-01 | -0.13 | 5.19E-01 |
| <b>C6orf89</b>        | 0.06  | 7.66E-01 | -0.13 | 5.19E-01 |
| <b>CENPQ</b>          | 0.16  | 4.13E-01 | 0.13  | 5.19E-01 |
| <b>CHRNA7</b>         | -0.07 | 7.28E-01 | -0.13 | 5.19E-01 |
| <b>CTD-2329K10.1</b>  | 0.20  | 3.11E-01 | 0.13  | 5.19E-01 |
| <b>DEDD</b>           | 0.13  | 5.02E-01 | 0.13  | 5.19E-01 |
| <b>G3BP1</b>          | 0.27  | 1.67E-01 | -0.13 | 5.19E-01 |
| <b>LA16c-358B7.3</b>  | -0.18 | 3.70E-01 | 0.13  | 5.19E-01 |
| <b>LINC00476</b>      | 0.11  | 5.65E-01 | -0.13 | 5.19E-01 |
| <b>LINGO1</b>         | -0.21 | 2.88E-01 | 0.13  | 5.19E-01 |
| <b>NDUFV2</b>         | -0.13 | 4.97E-01 | -0.13 | 5.19E-01 |
| <b>RAB3A</b>          | 0.06  | 7.70E-01 | 0.13  | 5.19E-01 |
| <b>RIMS4</b>          | 0.08  | 6.90E-01 | -0.13 | 5.19E-01 |
| <b>RNU6-877P</b>      | 0.11  | 5.67E-01 | 0.13  | 5.19E-01 |
| <b>RP11-1293J14.1</b> | -0.13 | 4.98E-01 | 0.13  | 5.19E-01 |
| <b>RP11-298I3.3</b>   | -0.04 | 8.53E-01 | -0.13 | 5.19E-01 |
| <b>RP11-332H14.1</b>  | 0.25  | 2.01E-01 | -0.13 | 5.19E-01 |
| <b>RP11-394B2.7</b>   | 0.26  | 1.84E-01 | -0.13 | 5.19E-01 |
| <b>RP11-726G1.1</b>   | -0.27 | 1.59E-01 | -0.13 | 5.19E-01 |
| <b>RP11-95O2.5</b>    | -0.09 | 6.55E-01 | 0.13  | 5.19E-01 |
| <b>RPL32P3</b>        | -0.35 | 6.57E-02 | -0.13 | 5.19E-01 |
| <b>SLC44A3</b>        | -0.16 | 4.08E-01 | 0.13  | 5.19E-01 |

|                  |       |          |       |          |
|------------------|-------|----------|-------|----------|
| WNT11            | 0.06  | 7.45E-01 | -0.13 | 5.19E-01 |
| XLOC_001066      | -0.08 | 6.82E-01 | 0.13  | 5.19E-01 |
| ZBTB4            | 0.07  | 7.27E-01 | -0.13 | 5.19E-01 |
| ZNF324B          | 0.23  | 2.36E-01 | 0.13  | 5.19E-01 |
| AC092155.4       | -0.04 | 8.49E-01 | 0.13  | 5.20E-01 |
| C11orf95         | 0.01  | 9.67E-01 | 0.13  | 5.20E-01 |
| CPNE5            | -0.14 | 4.87E-01 | 0.13  | 5.20E-01 |
| CTD-2562J15.4    | 0.36  | 5.82E-02 | -0.13 | 5.20E-01 |
| FAM131C          | -0.11 | 5.80E-01 | 0.13  | 5.20E-01 |
| GGT3P            | -0.16 | 4.24E-01 | -0.13 | 5.20E-01 |
| GGT6             | -0.07 | 7.31E-01 | -0.13 | 5.20E-01 |
| GS1-114I9.3      | 0.17  | 3.92E-01 | -0.13 | 5.20E-01 |
| KRT25            | -0.07 | 7.05E-01 | 0.13  | 5.20E-01 |
| LRIF1            | 0.29  | 1.40E-01 | -0.13 | 5.20E-01 |
| MICE             | -0.11 | 5.87E-01 | -0.13 | 5.20E-01 |
| PCMTD2           | 0.05  | 7.93E-01 | 0.13  | 5.20E-01 |
| PDXDC2P          | -0.22 | 2.67E-01 | -0.13 | 5.20E-01 |
| RNA5SP354        | -0.20 | 3.15E-01 | 0.13  | 5.20E-01 |
| RP1-39G22.7      | -0.06 | 7.75E-01 | -0.13 | 5.20E-01 |
| RP11-108M9.4     | -0.03 | 8.94E-01 | -0.13 | 5.20E-01 |
| RP11-318C2.1     | -0.13 | 5.04E-01 | 0.13  | 5.20E-01 |
| RP11-813P10.1    | -0.12 | 5.36E-01 | -0.13 | 5.20E-01 |
| RPL9P16          | -0.05 | 7.96E-01 | 0.13  | 5.20E-01 |
| RRN3P3           | 0.04  | 8.28E-01 | -0.13 | 5.20E-01 |
| SERINC3          | 0.00  | 9.96E-01 | 0.13  | 5.20E-01 |
| SP4              | 0.03  | 8.71E-01 | 0.13  | 5.20E-01 |
| TMEM40           | 0.30  | 1.22E-01 | 0.13  | 5.20E-01 |
| WDR49            | 0.03  | 8.66E-01 | -0.13 | 5.20E-01 |
| ZNF691           | 0.29  | 1.33E-01 | 0.13  | 5.20E-01 |
| AC007362.3       | -0.06 | 7.66E-01 | 0.13  | 5.21E-01 |
| C3orf36          | -0.14 | 4.67E-01 | 0.13  | 5.21E-01 |
| CSRNP1           | 0.02  | 9.09E-01 | 0.13  | 5.21E-01 |
| CTD-2301A4.3     | -0.05 | 7.99E-01 | -0.13 | 5.21E-01 |
| CUBNP2           | 0.35  | 6.50E-02 | 0.13  | 5.21E-01 |
| DHRS7            | 0.11  | 5.71E-01 | 0.13  | 5.21E-01 |
| G31689           | -0.03 | 8.75E-01 | -0.13 | 5.21E-01 |
| GS1-124K5.4      | 0.03  | 8.98E-01 | 0.13  | 5.21E-01 |
| GSTM2            | 0.01  | 9.58E-01 | -0.13 | 5.21E-01 |
| HCG25            | 0.01  | 9.71E-01 | 0.13  | 5.21E-01 |
| IL23A            | 0.38  | 4.44E-02 | 0.13  | 5.21E-01 |
| KLHDC10          | 0.11  | 5.79E-01 | -0.13 | 5.21E-01 |
| LINC00578        | 0.34  | 7.29E-02 | 0.13  | 5.21E-01 |
| LL09NC01-251B2.3 | -0.17 | 3.97E-01 | -0.13 | 5.21E-01 |
| MT-TL1           | 0.28  | 1.53E-01 | -0.13 | 5.21E-01 |
| NDOR1            | 0.09  | 6.53E-01 | 0.13  | 5.21E-01 |
| NRD1             | -0.08 | 6.68E-01 | -0.13 | 5.21E-01 |
| PLOD3            | -0.05 | 7.98E-01 | -0.13 | 5.21E-01 |

|                 |       |          |       |          |
|-----------------|-------|----------|-------|----------|
| RHPN2           | -0.17 | 3.91E-01 | -0.13 | 5.21E-01 |
| RN7SKP23        | -0.07 | 7.29E-01 | -0.13 | 5.21E-01 |
| RNU6-126P       | 0.13  | 4.99E-01 | -0.13 | 5.21E-01 |
| RNU6-476P       | -0.09 | 6.33E-01 | -0.13 | 5.21E-01 |
| RP11-10J21.2    | -0.27 | 1.71E-01 | 0.13  | 5.21E-01 |
| RP11-12M5.4     | -0.29 | 1.41E-01 | -0.13 | 5.21E-01 |
| RP11-16E23.3    | 0.24  | 2.27E-01 | -0.13 | 5.21E-01 |
| RP11-254F19.4   | -0.09 | 6.38E-01 | -0.13 | 5.21E-01 |
| RP11-405L18.4   | 0.14  | 4.68E-01 | 0.13  | 5.21E-01 |
| RP11-434E6.4    | -0.17 | 3.93E-01 | -0.13 | 5.21E-01 |
| RP11-541M12.6   | -0.09 | 6.35E-01 | -0.13 | 5.21E-01 |
| RP11-5C23.1     | 0.23  | 2.40E-01 | -0.13 | 5.21E-01 |
| RP4-566D2.1     | -0.18 | 3.63E-01 | -0.13 | 5.21E-01 |
| RPL26L1         | 0.20  | 3.06E-01 | 0.13  | 5.21E-01 |
| SBDS            | 0.03  | 8.83E-01 | -0.13 | 5.21E-01 |
| SERPINA9        | 0.19  | 3.35E-01 | -0.13 | 5.21E-01 |
| SFN             | 0.22  | 2.63E-01 | 0.13  | 5.21E-01 |
| SMARCC1         | -0.07 | 7.35E-01 | -0.13 | 5.21E-01 |
| SMG1P7          | -0.05 | 7.92E-01 | -0.13 | 5.21E-01 |
| SPATA2L         | 0.08  | 6.85E-01 | 0.13  | 5.21E-01 |
| SRFBP1          | 0.11  | 5.72E-01 | -0.13 | 5.21E-01 |
| TMEM198B        | -0.34 | 7.64E-02 | 0.13  | 5.21E-01 |
| UBE2CP1         | -0.32 | 9.78E-02 | -0.13 | 5.21E-01 |
| UFL1-AS1        | -0.04 | 8.24E-01 | -0.13 | 5.21E-01 |
| XXyac-YR38GF2.1 | -0.17 | 4.00E-01 | -0.13 | 5.21E-01 |
| ZMYND15         | 0.01  | 9.47E-01 | 0.13  | 5.21E-01 |
| ZNF768          | 0.02  | 9.29E-01 | -0.13 | 5.21E-01 |
| AOAH            | -0.08 | 6.83E-01 | 0.13  | 5.22E-01 |
| C2orf71         | -0.16 | 4.30E-01 | -0.13 | 5.22E-01 |
| EFCAB2          | 0.12  | 5.59E-01 | 0.13  | 5.22E-01 |
| EXOC4           | -0.10 | 6.02E-01 | 0.13  | 5.22E-01 |
| GFRA1           | -0.17 | 3.91E-01 | -0.13 | 5.22E-01 |
| GTF2IRD1P1      | 0.12  | 5.52E-01 | -0.13 | 5.22E-01 |
| HGSNAT          | -0.09 | 6.48E-01 | 0.13  | 5.22E-01 |
| IDH1-AS1        | 0.11  | 5.62E-01 | -0.13 | 5.22E-01 |
| KATNBL1         | -0.08 | 6.88E-01 | -0.13 | 5.22E-01 |
| KCNQ3           | -0.30 | 1.15E-01 | 0.13  | 5.22E-01 |
| LINC00504       | -0.13 | 5.13E-01 | -0.13 | 5.22E-01 |
| LURAP1L-AS1     | -0.27 | 1.60E-01 | -0.13 | 5.22E-01 |
| MT-ATP8         | 0.27  | 1.61E-01 | 0.13  | 5.22E-01 |
| NPL             | 0.17  | 3.75E-01 | 0.13  | 5.22E-01 |
| PPP2R5A         | 0.06  | 7.70E-01 | -0.13 | 5.22E-01 |
| PRPS1P2         | -0.10 | 6.31E-01 | -0.13 | 5.22E-01 |
| RNVU1-15        | 0.07  | 7.18E-01 | 0.13  | 5.22E-01 |
| RP11-297K8.2    | 0.02  | 9.28E-01 | -0.13 | 5.22E-01 |
| RP11-311H10.4   | -0.03 | 8.93E-01 | 0.13  | 5.22E-01 |
| RP11-406A9.2    | 0.07  | 7.32E-01 | -0.13 | 5.22E-01 |

|               |       |          |       |          |
|---------------|-------|----------|-------|----------|
| RP11-848P1.4  | 0.14  | 4.80E-01 | -0.13 | 5.22E-01 |
| RP4-604G5.3   | -0.08 | 7.01E-01 | -0.13 | 5.22E-01 |
| RP4-710M16.2  | -0.17 | 3.95E-01 | 0.13  | 5.22E-01 |
| RP5-1056L3.3  | -0.20 | 3.06E-01 | -0.13 | 5.22E-01 |
| SLC10A3       | -0.07 | 7.35E-01 | 0.13  | 5.22E-01 |
| SLC35E1       | 0.16  | 4.04E-01 | 0.13  | 5.22E-01 |
| SYF2          | -0.02 | 9.35E-01 | 0.13  | 5.22E-01 |
| TMEM9B        | 0.21  | 2.72E-01 | -0.13 | 5.22E-01 |
| XLOC_001595   | -0.02 | 9.28E-01 | -0.13 | 5.22E-01 |
| XLOC_003480   | 0.09  | 6.59E-01 | 0.13  | 5.22E-01 |
| XLOC_013968   | -0.18 | 3.64E-01 | -0.13 | 5.22E-01 |
| ZNF474        | 0.03  | 8.83E-01 | 0.13  | 5.22E-01 |
| ABI1          | 0.03  | 8.92E-01 | -0.13 | 5.23E-01 |
| AC007899.3    | -0.02 | 9.20E-01 | -0.13 | 5.23E-01 |
| AP000344.3    | -0.11 | 5.87E-01 | 0.13  | 5.23E-01 |
| C4orf33       | 0.13  | 5.09E-01 | 0.13  | 5.23E-01 |
| CAGE1         | -0.07 | 7.25E-01 | -0.13 | 5.23E-01 |
| CLDN2         | -0.10 | 6.23E-01 | -0.13 | 5.23E-01 |
| COG7          | 0.00  | 9.89E-01 | 0.13  | 5.23E-01 |
| CPTP          | 0.06  | 7.44E-01 | 0.13  | 5.23E-01 |
| CTC-137K3.1   | -0.25 | 1.97E-01 | -0.13 | 5.23E-01 |
| CTD-2017D11.1 | -0.38 | 4.41E-02 | -0.13 | 5.23E-01 |
| DUSP19        | 0.01  | 9.67E-01 | 0.13  | 5.23E-01 |
| G29896        | -0.04 | 8.31E-01 | 0.13  | 5.23E-01 |
| GFRA3         | 0.19  | 3.46E-01 | 0.13  | 5.23E-01 |
| IFFO2         | -0.17 | 3.77E-01 | -0.13 | 5.23E-01 |
| KCNB2         | -0.25 | 2.07E-01 | -0.13 | 5.23E-01 |
| KIF6          | -0.15 | 4.33E-01 | -0.13 | 5.23E-01 |
| LCMT1-AS2     | -0.14 | 4.85E-01 | -0.13 | 5.23E-01 |
| LINC00963     | 0.12  | 5.47E-01 | -0.13 | 5.23E-01 |
| RNU6-969P     | -0.11 | 5.71E-01 | 0.13  | 5.23E-01 |
| RP11-212P7.1  | -0.10 | 6.20E-01 | -0.13 | 5.23E-01 |
| RP11-79P5.9   | -0.03 | 8.68E-01 | -0.13 | 5.23E-01 |
| RPL21P110     | -0.28 | 1.42E-01 | 0.13  | 5.23E-01 |
| RRAD          | 0.05  | 8.07E-01 | 0.13  | 5.23E-01 |
| SPSB4         | -0.01 | 9.57E-01 | -0.13 | 5.23E-01 |
| TRPV2         | -0.07 | 7.27E-01 | 0.13  | 5.23E-01 |
| ABCA6         | -0.04 | 8.48E-01 | 0.13  | 5.24E-01 |
| ADCY8         | -0.11 | 5.65E-01 | -0.13 | 5.24E-01 |
| ARPC3P1       | -0.03 | 8.64E-01 | 0.13  | 5.24E-01 |
| ARPP19        | 0.18  | 3.63E-01 | -0.13 | 5.24E-01 |
| ATP5F1P1      | -0.35 | 6.89E-02 | 0.13  | 5.24E-01 |
| CDCA4P2       | 0.06  | 7.64E-01 | -0.13 | 5.24E-01 |
| CTC-471F3.5   | -0.05 | 8.01E-01 | -0.13 | 5.24E-01 |
| CTD-2228K2.1  | -0.11 | 5.66E-01 | -0.13 | 5.24E-01 |
| CTD-2270P14.5 | -0.13 | 5.20E-01 | 0.13  | 5.24E-01 |
| CTD-2287O16.4 | 0.32  | 1.00E-01 | -0.13 | 5.24E-01 |

|                       |       |          |       |          |
|-----------------------|-------|----------|-------|----------|
| <b>CTD-2306A12.1</b>  | -0.01 | 9.71E-01 | -0.13 | 5.24E-01 |
| <b>DCAF13</b>         | 0.12  | 5.29E-01 | -0.13 | 5.24E-01 |
| <b>FLRT1</b>          | -0.18 | 3.60E-01 | -0.13 | 5.24E-01 |
| <b>G32308</b>         | -0.06 | 7.44E-01 | 0.13  | 5.24E-01 |
| <b>GLYR1</b>          | 0.16  | 4.28E-01 | 0.13  | 5.24E-01 |
| <b>GRWD1</b>          | 0.22  | 2.56E-01 | 0.13  | 5.24E-01 |
| <b>HLA-DPA1</b>       | 0.17  | 3.99E-01 | 0.13  | 5.24E-01 |
| <b>HSD11B2</b>        | 0.03  | 8.85E-01 | 0.13  | 5.24E-01 |
| <b>KCNJ10</b>         | -0.07 | 7.13E-01 | -0.13 | 5.24E-01 |
| <b>LCP1</b>           | 0.19  | 3.43E-01 | 0.13  | 5.24E-01 |
| <b>LINC00163</b>      | -0.22 | 2.65E-01 | -0.13 | 5.24E-01 |
| <b>LINC00310</b>      | -0.18 | 3.46E-01 | 0.13  | 5.24E-01 |
| <b>LINC01562</b>      | 0.22  | 2.70E-01 | 0.13  | 5.24E-01 |
| <b>LYPD3</b>          | -0.03 | 8.99E-01 | 0.13  | 5.24E-01 |
| <b>MRPS10P1</b>       | -0.16 | 4.03E-01 | -0.13 | 5.24E-01 |
| <b>MTND4P15</b>       | -0.12 | 5.35E-01 | 0.13  | 5.24E-01 |
| <b>NOP56P1</b>        | 0.06  | 7.43E-01 | 0.13  | 5.24E-01 |
| <b>PCYT1B</b>         | -0.01 | 9.79E-01 | -0.13 | 5.24E-01 |
| <b>PICK1</b>          | 0.07  | 7.38E-01 | 0.13  | 5.24E-01 |
| <b>PLAC8</b>          | 0.25  | 2.01E-01 | 0.13  | 5.24E-01 |
| <b>PON1</b>           | 0.31  | 1.10E-01 | -0.13 | 5.24E-01 |
| <b>POU5F1P3</b>       | 0.03  | 8.61E-01 | -0.13 | 5.24E-01 |
| <b>PRKCE</b>          | -0.01 | 9.57E-01 | -0.13 | 5.24E-01 |
| <b>RIMBP3</b>         | -0.14 | 4.75E-01 | 0.13  | 5.24E-01 |
| <b>RN7SKP151</b>      | 0.00  | 9.82E-01 | 0.13  | 5.24E-01 |
| <b>RNU7-80P</b>       | -0.16 | 4.28E-01 | -0.13 | 5.24E-01 |
| <b>RP11-309L24.4</b>  | 0.04  | 8.33E-01 | 0.13  | 5.24E-01 |
| <b>RP11-359B12.2</b>  | 0.08  | 7.01E-01 | -0.13 | 5.24E-01 |
| <b>RP11-59H7.4</b>    | 0.14  | 4.72E-01 | 0.13  | 5.24E-01 |
| <b>RPS4XP17</b>       | -0.02 | 9.32E-01 | -0.13 | 5.24E-01 |
| <b>TMEM159</b>        | 0.04  | 8.25E-01 | 0.13  | 5.24E-01 |
| <b>TXLNB</b>          | 0.13  | 4.97E-01 | 0.13  | 5.24E-01 |
| <b>AC074338.4</b>     | 0.35  | 6.52E-02 | 0.13  | 5.25E-01 |
| <b>BID</b>            | 0.44  | 2.04E-02 | 0.13  | 5.25E-01 |
| <b>C15orf54</b>       | -0.26 | 1.83E-01 | 0.13  | 5.25E-01 |
| <b>COPS7A</b>         | 0.11  | 5.71E-01 | 0.13  | 5.25E-01 |
| <b>CTC-563A5.2</b>    | 0.08  | 6.79E-01 | 0.13  | 5.25E-01 |
| <b>RABL6</b>          | 0.08  | 6.68E-01 | 0.13  | 5.25E-01 |
| <b>RASGEF1B</b>       | 0.07  | 7.13E-01 | 0.13  | 5.25E-01 |
| <b>RP11-741G21.1</b>  | 0.02  | 9.05E-01 | 0.13  | 5.25E-01 |
| <b>TRIM59</b>         | 0.25  | 2.08E-01 | 0.13  | 5.25E-01 |
| <b>UFD1L</b>          | 0.04  | 8.51E-01 | 0.13  | 5.25E-01 |
| <b>VOPP1</b>          | 0.17  | 3.90E-01 | 0.13  | 5.25E-01 |
| <b>ZBTB42</b>         | 0.09  | 6.35E-01 | 0.13  | 5.25E-01 |
| <b>CTD-2517M22.14</b> | -0.19 | 3.41E-01 | -0.13 | 5.25E-01 |
| <b>HNRNPA1P16</b>     | -0.10 | 6.05E-01 | -0.13 | 5.25E-01 |
| <b>MRPL32</b>         | 0.18  | 3.47E-01 | -0.13 | 5.25E-01 |

|                      |       |          |       |          |
|----------------------|-------|----------|-------|----------|
| <b>MTCYBP23</b>      | -0.24 | 2.15E-01 | -0.13 | 5.25E-01 |
| <b>PKD1P6</b>        | -0.26 | 1.83E-01 | -0.13 | 5.25E-01 |
| <b>PLPPR4</b>        | -0.40 | 3.33E-02 | -0.13 | 5.25E-01 |
| <b>RN7SL130P</b>     | -0.17 | 3.74E-01 | -0.13 | 5.25E-01 |
| <b>RP11-417J8.6</b>  | 0.12  | 5.31E-01 | -0.13 | 5.25E-01 |
| <b>RP11-613C6.4</b>  | -0.06 | 7.51E-01 | -0.13 | 5.25E-01 |
| <b>RP11-778O17.4</b> | -0.20 | 2.97E-01 | -0.13 | 5.25E-01 |
| <b>RP4-591B8.2</b>   | 0.23  | 2.45E-01 | -0.13 | 5.25E-01 |
| <b>RP4-728D4.3</b>   | -0.08 | 6.83E-01 | -0.13 | 5.25E-01 |
| <b>UBE2CP2</b>       | -0.28 | 1.43E-01 | -0.13 | 5.25E-01 |
| <b>UGT1A3</b>        | 0.27  | 1.67E-01 | -0.13 | 5.25E-01 |
| <b>ZNF350-AS1</b>    | -0.44 | 1.84E-02 | -0.13 | 5.25E-01 |
| <b>AC002064.4</b>    | -0.36 | 6.09E-02 | -0.13 | 5.26E-01 |
| <b>AC083843.1</b>    | 0.07  | 7.09E-01 | -0.13 | 5.26E-01 |
| <b>ADAM1B</b>        | -0.17 | 3.96E-01 | -0.13 | 5.26E-01 |
| <b>AL133458.1</b>    | 0.11  | 5.80E-01 | -0.13 | 5.26E-01 |
| <b>AQP6</b>          | -0.15 | 4.44E-01 | 0.13  | 5.26E-01 |
| <b>CDV3</b>          | 0.14  | 4.85E-01 | -0.13 | 5.26E-01 |
| <b>CXorf40B</b>      | 0.22  | 2.54E-01 | 0.13  | 5.26E-01 |
| <b>CYTH3</b>         | -0.12 | 5.33E-01 | -0.13 | 5.26E-01 |
| <b>1-Dec</b>         | 0.02  | 9.05E-01 | -0.13 | 5.26E-01 |
| <b>G30728</b>        | 0.20  | 3.15E-01 | 0.13  | 5.26E-01 |
| <b>GCA</b>           | 0.29  | 1.32E-01 | -0.13 | 5.26E-01 |
| <b>GMDS-AS1</b>      | 0.10  | 6.07E-01 | 0.13  | 5.26E-01 |
| <b>GNS</b>           | 0.03  | 8.85E-01 | 0.13  | 5.26E-01 |
| <b>LINC01625</b>     | -0.02 | 9.38E-01 | -0.13 | 5.26E-01 |
| <b>OSBPL10-AS1</b>   | -0.07 | 7.24E-01 | -0.13 | 5.26E-01 |
| <b>PGLYRP1</b>       | 0.36  | 6.26E-02 | -0.13 | 5.26E-01 |
| <b>PHLPP1</b>        | -0.08 | 6.93E-01 | -0.13 | 5.26E-01 |
| <b>PWWP2B</b>        | -0.12 | 5.58E-01 | -0.13 | 5.26E-01 |
| <b>RP11-191L9.5</b>  | -0.08 | 6.71E-01 | 0.13  | 5.26E-01 |
| <b>RP11-305M3.2</b>  | -0.34 | 7.34E-02 | -0.13 | 5.26E-01 |
| <b>RP11-326K13.4</b> | 0.13  | 5.24E-01 | 0.13  | 5.26E-01 |
| <b>RP11-426K3.1</b>  | 0.24  | 2.15E-01 | -0.13 | 5.26E-01 |
| <b>RP11-598D12.4</b> | 0.13  | 5.19E-01 | 0.13  | 5.26E-01 |
| <b>RP11-668G10.2</b> | 0.18  | 3.65E-01 | -0.13 | 5.26E-01 |
| <b>RP11-68I3.11</b>  | 0.25  | 2.00E-01 | 0.13  | 5.26E-01 |
| <b>RP3-375P9.2</b>   | -0.05 | 8.01E-01 | -0.13 | 5.26E-01 |
| <b>SACS-AS1</b>      | 0.27  | 1.69E-01 | -0.13 | 5.26E-01 |
| <b>SNX25P1</b>       | 0.15  | 4.34E-01 | -0.13 | 5.26E-01 |
| <b>SPAG9</b>         | -0.09 | 6.54E-01 | -0.13 | 5.26E-01 |
| <b>TSPAN17</b>       | 0.33  | 8.32E-02 | 0.13  | 5.26E-01 |
| <b>ZNF33A</b>        | 0.13  | 5.00E-01 | -0.13 | 5.26E-01 |
| <b>ZNF442</b>        | 0.06  | 7.77E-01 | -0.13 | 5.26E-01 |
| <b>ZNRF2</b>         | -0.03 | 8.87E-01 | -0.13 | 5.26E-01 |
| <b>AGBL5</b>         | -0.16 | 4.20E-01 | 0.13  | 5.27E-01 |
| <b>AP000889.1</b>    | 0.04  | 8.26E-01 | -0.13 | 5.27E-01 |

|               |       |          |       |          |
|---------------|-------|----------|-------|----------|
| AP001046.5    | 0.02  | 9.22E-01 | -0.13 | 5.27E-01 |
| ASNSP1        | -0.17 | 4.00E-01 | -0.13 | 5.27E-01 |
| BCL9L         | 0.07  | 7.36E-01 | 0.13  | 5.27E-01 |
| BSPRY         | -0.08 | 6.73E-01 | -0.13 | 5.27E-01 |
| C14orf169     | 0.14  | 4.72E-01 | 0.13  | 5.27E-01 |
| C1QTNF4       | 0.13  | 5.20E-01 | 0.13  | 5.27E-01 |
| CBX1P1        | -0.03 | 8.85E-01 | -0.13 | 5.27E-01 |
| CECR7         | -0.14 | 4.86E-01 | 0.13  | 5.27E-01 |
| CENPN         | 0.15  | 4.47E-01 | -0.13 | 5.27E-01 |
| CTC-523E23.11 | -0.15 | 4.35E-01 | -0.13 | 5.27E-01 |
| CTC-524C5.2   | -0.05 | 7.89E-01 | -0.13 | 5.27E-01 |
| CTD-2017D11.2 | -0.39 | 3.76E-02 | -0.13 | 5.27E-01 |
| DIS3          | 0.16  | 4.11E-01 | 0.13  | 5.27E-01 |
| EDEM2         | -0.09 | 6.35E-01 | 0.13  | 5.27E-01 |
| KCNIP3        | -0.16 | 4.22E-01 | 0.13  | 5.27E-01 |
| KRTAP5-AS1    | 0.35  | 6.84E-02 | -0.13 | 5.27E-01 |
| LINC00933     | 0.25  | 1.91E-01 | 0.13  | 5.27E-01 |
| MIR5188       | 0.18  | 3.66E-01 | -0.13 | 5.27E-01 |
| PCDHGA9       | 0.08  | 6.92E-01 | -0.13 | 5.27E-01 |
| RNF126        | 0.20  | 3.20E-01 | -0.13 | 5.27E-01 |
| RNU5E-1       | 0.02  | 9.00E-01 | 0.13  | 5.27E-01 |
| RP11-361L15.5 | -0.12 | 5.34E-01 | 0.13  | 5.27E-01 |
| RP11-70C1.3   | 0.05  | 7.83E-01 | 0.13  | 5.27E-01 |
| RP11-73O6.3   | -0.04 | 8.29E-01 | 0.13  | 5.27E-01 |
| RP4-673M15.1  | -0.28 | 1.42E-01 | -0.13 | 5.27E-01 |
| SIX1          | 0.09  | 6.45E-01 | 0.13  | 5.27E-01 |
| SUV420H2      | -0.17 | 3.89E-01 | -0.13 | 5.27E-01 |
| TUBB1         | -0.17 | 3.96E-01 | 0.13  | 5.27E-01 |
| VPS29         | -0.02 | 9.08E-01 | -0.13 | 5.27E-01 |
| BANP          | 0.03  | 8.92E-01 | 0.13  | 5.28E-01 |
| CTD-2196E14.3 | -0.11 | 5.71E-01 | 0.13  | 5.28E-01 |
| G7527         | -0.12 | 5.33E-01 | -0.13 | 5.28E-01 |
| GAPDHP2       | -0.25 | 1.94E-01 | 0.13  | 5.28E-01 |
| HLA-DRB6      | 0.14  | 4.87E-01 | -0.13 | 5.28E-01 |
| KIAA0391      | -0.09 | 6.35E-01 | -0.13 | 5.28E-01 |
| LINC00680     | -0.23 | 2.42E-01 | -0.13 | 5.28E-01 |
| LINC01341     | 0.22  | 2.70E-01 | -0.13 | 5.28E-01 |
| LINC01514     | -0.22 | 2.51E-01 | 0.13  | 5.28E-01 |
| LSM2          | -0.02 | 9.11E-01 | 0.13  | 5.28E-01 |
| MAF1          | 0.14  | 4.72E-01 | 0.13  | 5.28E-01 |
| RN7SL373P     | -0.02 | 9.26E-01 | 0.13  | 5.28E-01 |
| RNU6-455P     | -0.32 | 9.78E-02 | 0.13  | 5.28E-01 |
| RP11-115J16.1 | -0.22 | 2.57E-01 | -0.13 | 5.28E-01 |
| RP11-447H19.4 | -0.06 | 7.80E-01 | -0.13 | 5.28E-01 |
| RP11-667M19.2 | -0.14 | 4.87E-01 | -0.13 | 5.28E-01 |
| RP11-712L6.8  | -0.22 | 2.71E-01 | -0.13 | 5.28E-01 |
| SERPINI1      | -0.14 | 4.91E-01 | -0.13 | 5.28E-01 |



|               |       |          |       |          |
|---------------|-------|----------|-------|----------|
| SETX          | 0.06  | 7.60E-01 | -0.13 | 5.28E-01 |
| SNORA40       | 0.10  | 6.26E-01 | -0.13 | 5.28E-01 |
| SSR4P1        | 0.26  | 1.81E-01 | -0.13 | 5.28E-01 |
| STX3          | 0.10  | 6.31E-01 | 0.13  | 5.28E-01 |
| TRAJ39        | -0.41 | 2.86E-02 | -0.13 | 5.28E-01 |
| VPS18         | 0.24  | 2.14E-01 | 0.13  | 5.28E-01 |
| ZNF672        | 0.32  | 9.96E-02 | 0.13  | 5.28E-01 |
| ABCA11P       | 0.10  | 6.17E-01 | -0.13 | 5.29E-01 |
| AC092614.2    | 0.39  | 4.20E-02 | 0.13  | 5.29E-01 |
| AC093375.1    | 0.00  | 9.98E-01 | -0.13 | 5.29E-01 |
| BTN3A2        | 0.23  | 2.30E-01 | 0.13  | 5.29E-01 |
| DGCR9         | -0.15 | 4.54E-01 | -0.13 | 5.29E-01 |
| G19624        | -0.16 | 4.05E-01 | 0.13  | 5.29E-01 |
| GYPA          | -0.05 | 7.95E-01 | -0.13 | 5.29E-01 |
| IL1R2         | -0.02 | 9.09E-01 | 0.13  | 5.29E-01 |
| KRT82         | 0.14  | 4.63E-01 | 0.13  | 5.29E-01 |
| LINC01140     | -0.13 | 5.19E-01 | -0.13 | 5.29E-01 |
| MCUR1         | 0.09  | 6.50E-01 | 0.13  | 5.29E-01 |
| MESTIT1       | 0.05  | 7.85E-01 | -0.13 | 5.29E-01 |
| MNDA          | 0.09  | 6.47E-01 | -0.13 | 5.29E-01 |
| MRPL19        | 0.25  | 2.03E-01 | -0.13 | 5.29E-01 |
| PLVAP         | -0.08 | 6.76E-01 | 0.13  | 5.29E-01 |
| POMT1         | 0.19  | 3.20E-01 | 0.13  | 5.29E-01 |
| PPP1R14A      | -0.28 | 1.50E-01 | 0.13  | 5.29E-01 |
| RNU5E-2P      | 0.04  | 8.46E-01 | -0.13 | 5.29E-01 |
| RP11-108M9.5  | -0.14 | 4.66E-01 | -0.13 | 5.29E-01 |
| RP11-10A14.4  | -0.24 | 2.20E-01 | -0.13 | 5.29E-01 |
| RP11-355N15.1 | 0.06  | 7.51E-01 | -0.13 | 5.29E-01 |
| RP11-649G15.2 | -0.04 | 8.56E-01 | -0.13 | 5.29E-01 |
| RP11-669E14.6 | 0.00  | 9.99E-01 | 0.13  | 5.29E-01 |
| RP11-707O23.1 | -0.07 | 7.27E-01 | -0.13 | 5.29E-01 |
| RP5-1021I20.5 | 0.10  | 6.14E-01 | 0.13  | 5.29E-01 |
| RPL18AP2      | -0.54 | 3.06E-03 | -0.13 | 5.29E-01 |
| S100G         | -0.34 | 7.29E-02 | 0.13  | 5.29E-01 |
| SCARNA7       | -0.08 | 6.89E-01 | -0.13 | 5.29E-01 |
| SDCBP2-AS1    | 0.15  | 4.36E-01 | -0.13 | 5.29E-01 |
| STRA8         | -0.13 | 5.11E-01 | -0.13 | 5.29E-01 |
| STX11         | 0.14  | 4.83E-01 | 0.13  | 5.29E-01 |
| TMC2          | 0.25  | 2.06E-01 | -0.13 | 5.29E-01 |
| UTP20         | 0.06  | 7.46E-01 | -0.13 | 5.29E-01 |
| YPEL4         | -0.24 | 2.20E-01 | 0.13  | 5.29E-01 |
| AC010525.2    | 0.17  | 3.89E-01 | -0.13 | 5.30E-01 |
| AC068831.10   | -0.02 | 9.04E-01 | -0.13 | 5.30E-01 |
| CLDN3         | -0.22 | 2.56E-01 | -0.13 | 5.30E-01 |
| G29816        | 0.10  | 6.12E-01 | -0.13 | 5.30E-01 |
| GTF3C3        | -0.07 | 7.14E-01 | -0.13 | 5.30E-01 |
| HSP90AA1      | -0.17 | 3.92E-01 | -0.13 | 5.30E-01 |

|               |       |          |       |          |
|---------------|-------|----------|-------|----------|
| LINC00158     | 0.13  | 5.03E-01 | -0.13 | 5.30E-01 |
| LINC01314     | -0.08 | 7.03E-01 | -0.13 | 5.30E-01 |
| MAK16         | 0.20  | 3.18E-01 | -0.13 | 5.30E-01 |
| PGM5P1        | -0.14 | 4.66E-01 | -0.13 | 5.30E-01 |
| PRIMPOL       | -0.03 | 8.88E-01 | -0.13 | 5.30E-01 |
| RP11-146F11.1 | 0.13  | 5.21E-01 | -0.13 | 5.30E-01 |
| RP11-397P13.6 | -0.02 | 9.24E-01 | -0.13 | 5.30E-01 |
| RP11-506F3.1  | -0.08 | 6.71E-01 | -0.13 | 5.30E-01 |
| RPL7AP11      | 0.00  | 9.87E-01 | -0.13 | 5.30E-01 |
| SNORD60       | 0.10  | 5.98E-01 | -0.13 | 5.30E-01 |
| XLOC_005347   | 0.36  | 5.64E-02 | -0.13 | 5.30E-01 |
| GRK6          | 0.03  | 8.80E-01 | 0.13  | 5.30E-01 |
| LINC01482     | 0.09  | 6.44E-01 | 0.13  | 5.30E-01 |
| MTOR          | 0.04  | 8.45E-01 | 0.13  | 5.30E-01 |
| RP11-14C10.3  | -0.09 | 6.65E-01 | 0.13  | 5.30E-01 |
| RP11-757G14.3 | -0.22 | 2.66E-01 | 0.13  | 5.30E-01 |
| RP11-946L16.2 | -0.15 | 4.59E-01 | 0.13  | 5.30E-01 |
| SETP14        | -0.16 | 4.12E-01 | 0.13  | 5.30E-01 |
| TCEB1P31      | 0.02  | 9.34E-01 | 0.13  | 5.30E-01 |
| TRGV2         | 0.14  | 4.71E-01 | 0.13  | 5.30E-01 |
| UNC79         | 0.14  | 4.86E-01 | 0.13  | 5.30E-01 |
| AKT1          | 0.17  | 3.99E-01 | 0.13  | 5.31E-01 |
| AL356475.1    | 0.17  | 3.98E-01 | 0.13  | 5.31E-01 |
| CTA-293F17.1  | 0.20  | 3.02E-01 | 0.13  | 5.31E-01 |
| CTD-3092A11.1 | -0.14 | 4.92E-01 | 0.13  | 5.31E-01 |
| IFNAR1        | 0.31  | 1.13E-01 | 0.13  | 5.31E-01 |
| KRTAP8-1      | -0.04 | 8.39E-01 | 0.13  | 5.31E-01 |
| NHSL2         | -0.42 | 2.44E-02 | 0.13  | 5.31E-01 |
| NLRP12        | 0.29  | 1.35E-01 | 0.13  | 5.31E-01 |
| PABPC1        | 0.33  | 8.48E-02 | 0.13  | 5.31E-01 |
| RNF10         | 0.21  | 2.87E-01 | 0.13  | 5.31E-01 |
| RP11-325I22.3 | 0.05  | 8.14E-01 | 0.13  | 5.31E-01 |
| RP11-55K22.2  | -0.07 | 7.09E-01 | 0.13  | 5.31E-01 |
| RP11-83N9.5   | 0.21  | 2.89E-01 | 0.13  | 5.31E-01 |
| RP4-605O3.4   | -0.32 | 9.99E-02 | 0.13  | 5.31E-01 |
| SOX12         | 0.14  | 4.92E-01 | 0.13  | 5.31E-01 |
| SURF4         | 0.10  | 5.97E-01 | 0.13  | 5.31E-01 |
| TMEM51        | -0.03 | 8.98E-01 | 0.13  | 5.31E-01 |
| TUBB8P1       | 0.12  | 5.30E-01 | 0.13  | 5.31E-01 |
| KCNMB2-AS1    | 0.23  | 2.50E-01 | -0.13 | 5.31E-01 |
| LRRC37A16P    | -0.36 | 5.99E-02 | -0.13 | 5.31E-01 |
| NT5DC3        | 0.05  | 8.10E-01 | -0.13 | 5.31E-01 |
| RP1-102D24.5  | -0.10 | 5.96E-01 | -0.13 | 5.31E-01 |
| RP11-12A16.3  | -0.11 | 5.70E-01 | -0.13 | 5.31E-01 |
| RP11-135F9.4  | 0.12  | 5.57E-01 | -0.13 | 5.31E-01 |
| RP11-295P9.3  | -0.17 | 3.93E-01 | -0.13 | 5.31E-01 |
| RP11-410L14.1 | 0.02  | 9.25E-01 | -0.13 | 5.31E-01 |

|               |       |          |       |          |
|---------------|-------|----------|-------|----------|
| RP4-680D5.2   | 0.08  | 7.01E-01 | -0.13 | 5.31E-01 |
| RPL21P5       | 0.00  | 9.87E-01 | -0.13 | 5.31E-01 |
| SLC9B2        | 0.13  | 5.15E-01 | -0.13 | 5.31E-01 |
| TNS2          | -0.31 | 1.06E-01 | -0.13 | 5.31E-01 |
| VN1R21P       | 0.30  | 1.16E-01 | -0.13 | 5.31E-01 |
| ACTG1P18      | -0.09 | 6.36E-01 | -0.13 | 5.32E-01 |
| ACTL10        | 0.12  | 5.54E-01 | -0.13 | 5.32E-01 |
| AL160175.1    | -0.05 | 7.93E-01 | -0.13 | 5.32E-01 |
| ANKRD34A      | 0.31  | 1.06E-01 | 0.13  | 5.32E-01 |
| ATP10B        | 0.24  | 2.16E-01 | 0.13  | 5.32E-01 |
| C16orf95      | -0.10 | 6.11E-01 | 0.13  | 5.32E-01 |
| C22orf23      | 0.36  | 5.94E-02 | 0.13  | 5.32E-01 |
| CH17-302M23.1 | -0.13 | 5.17E-01 | 0.13  | 5.32E-01 |
| CRHR1         | -0.01 | 9.48E-01 | -0.13 | 5.32E-01 |
| CTC-558O2.2   | -0.07 | 7.29E-01 | -0.13 | 5.32E-01 |
| CTD-2530H12.4 | -0.05 | 8.03E-01 | 0.13  | 5.32E-01 |
| CTDSPL        | 0.04  | 8.50E-01 | 0.13  | 5.32E-01 |
| DDX50P1       | -0.27 | 1.60E-01 | -0.13 | 5.32E-01 |
| EMP1          | -0.06 | 7.63E-01 | -0.13 | 5.32E-01 |
| FBXL8         | -0.01 | 9.61E-01 | 0.13  | 5.32E-01 |
| G10656        | 0.31  | 1.11E-01 | 0.13  | 5.32E-01 |
| G25499        | -0.22 | 2.53E-01 | -0.13 | 5.32E-01 |
| GCC2-AS1      | 0.39  | 4.01E-02 | 0.13  | 5.32E-01 |
| KRT12         | 0.11  | 5.83E-01 | 0.13  | 5.32E-01 |
| LARP4         | 0.10  | 6.05E-01 | -0.13 | 5.32E-01 |
| MTCO3P12      | 0.11  | 5.83E-01 | 0.13  | 5.32E-01 |
| MZF1          | -0.23 | 2.30E-01 | -0.13 | 5.32E-01 |
| NRADDP        | 0.13  | 5.02E-01 | -0.13 | 5.32E-01 |
| PI4KAP2       | -0.43 | 2.29E-02 | -0.13 | 5.32E-01 |
| PRR25         | -0.11 | 5.77E-01 | -0.13 | 5.32E-01 |
| RNU7-40P      | -0.37 | 5.01E-02 | -0.13 | 5.32E-01 |
| ROBO4         | 0.28  | 1.45E-01 | 0.13  | 5.32E-01 |
| RP11-143K11.7 | -0.20 | 3.09E-01 | 0.13  | 5.32E-01 |
| RP11-16K12.2  | 0.22  | 2.56E-01 | 0.13  | 5.32E-01 |
| RP11-90P5.5   | -0.12 | 5.43E-01 | 0.13  | 5.32E-01 |
| RP3-395C13.1  | 0.19  | 3.31E-01 | -0.13 | 5.32E-01 |
| RP5-1142A6.9  | 0.02  | 9.13E-01 | -0.13 | 5.32E-01 |
| SLC2A4        | -0.12 | 5.56E-01 | -0.13 | 5.32E-01 |
| SPRY4-IT1     | 0.07  | 7.42E-01 | 0.13  | 5.32E-01 |
| TAF6          | 0.17  | 3.81E-01 | 0.13  | 5.32E-01 |
| TBCAP2        | -0.08 | 6.91E-01 | 0.13  | 5.32E-01 |
| TCEB1P19      | -0.27 | 1.67E-01 | -0.13 | 5.32E-01 |
| TRMT2B-AS1    | -0.09 | 6.60E-01 | 0.13  | 5.32E-01 |
| TXLNG         | -0.13 | 4.95E-01 | -0.13 | 5.32E-01 |
| VPS33A        | 0.18  | 3.46E-01 | 0.13  | 5.32E-01 |
| ARMC10        | -0.19 | 3.22E-01 | -0.13 | 5.33E-01 |
| C7orf26       | -0.01 | 9.61E-01 | 0.13  | 5.33E-01 |

|                |       |          |       |          |
|----------------|-------|----------|-------|----------|
| CAV1           | -0.12 | 5.37E-01 | -0.13 | 5.33E-01 |
| CTD-2410N18.3  | 0.06  | 7.60E-01 | 0.13  | 5.33E-01 |
| DDX59          | -0.02 | 9.20E-01 | 0.13  | 5.33E-01 |
| ELMOD1         | -0.16 | 4.07E-01 | -0.13 | 5.33E-01 |
| ENOX2          | 0.05  | 8.03E-01 | 0.13  | 5.33E-01 |
| FAM131A        | -0.03 | 8.74E-01 | -0.13 | 5.33E-01 |
| FOXL1          | -0.11 | 5.60E-01 | -0.13 | 5.33E-01 |
| G41367         | 0.00  | 9.91E-01 | -0.13 | 5.33E-01 |
| HRH4           | -0.08 | 6.76E-01 | -0.13 | 5.33E-01 |
| JARID2         | -0.10 | 6.26E-01 | 0.13  | 5.33E-01 |
| LAMA2          | -0.07 | 7.07E-01 | 0.13  | 5.33E-01 |
| METTL21A       | 0.18  | 3.71E-01 | -0.13 | 5.33E-01 |
| MIR4766        | -0.40 | 3.73E-02 | 0.13  | 5.33E-01 |
| PCGF6          | 0.01  | 9.79E-01 | 0.13  | 5.33E-01 |
| RDX            | -0.17 | 3.91E-01 | -0.13 | 5.33E-01 |
| RP11-1021O19.2 | 0.05  | 8.15E-01 | -0.13 | 5.33E-01 |
| RP11-261C10.4  | 0.09  | 6.39E-01 | -0.13 | 5.33E-01 |
| RP11-488C13.1  | 0.14  | 4.67E-01 | 0.13  | 5.33E-01 |
| RP11-83A24.2   | -0.32 | 9.81E-02 | -0.13 | 5.33E-01 |
| RP11-87N24.1   | 0.18  | 3.61E-01 | 0.13  | 5.33E-01 |
| RP5-967N21.7   | 0.07  | 7.22E-01 | -0.13 | 5.33E-01 |
| RPL6P2         | -0.01 | 9.48E-01 | -0.13 | 5.33E-01 |
| SKP2           | 0.02  | 9.16E-01 | 0.13  | 5.33E-01 |
| SNORD78        | 0.19  | 3.22E-01 | -0.13 | 5.33E-01 |
| SPATA1         | -0.09 | 6.48E-01 | -0.13 | 5.33E-01 |
| THRB-AS1       | -0.24 | 2.16E-01 | 0.13  | 5.33E-01 |
| TRIM45         | -0.17 | 3.76E-01 | -0.13 | 5.33E-01 |
| ZBTB22         | 0.18  | 3.47E-01 | 0.13  | 5.33E-01 |
| AP004289.2     | -0.14 | 4.78E-01 | -0.13 | 5.34E-01 |
| COL10A1        | 0.00  | 9.92E-01 | -0.13 | 5.34E-01 |
| CTD-2012K14.8  | 0.18  | 3.52E-01 | -0.13 | 5.34E-01 |
| CYP27A1        | -0.25 | 2.04E-01 | -0.13 | 5.34E-01 |
| EIF5A2P1       | -0.43 | 2.23E-02 | -0.13 | 5.34E-01 |
| G14029         | -0.43 | 2.14E-02 | -0.13 | 5.34E-01 |
| G6008          | -0.10 | 6.20E-01 | -0.13 | 5.34E-01 |
| GPR12          | -0.04 | 8.49E-01 | -0.13 | 5.34E-01 |
| OR7A19P        | -0.22 | 2.71E-01 | -0.13 | 5.34E-01 |
| OTOP3          | -0.04 | 8.45E-01 | -0.13 | 5.34E-01 |
| RP11-131L23.1  | 0.11  | 5.73E-01 | -0.13 | 5.34E-01 |
| RP11-209D14.4  | 0.27  | 1.70E-01 | -0.13 | 5.34E-01 |
| RP11-359G22.4  | 0.21  | 2.87E-01 | -0.13 | 5.34E-01 |
| RP11-652L8.4   | 0.07  | 7.10E-01 | -0.13 | 5.34E-01 |
| RP11-781A6.1   | -0.17 | 3.92E-01 | -0.13 | 5.34E-01 |
| UXT            | 0.04  | 8.25E-01 | -0.13 | 5.34E-01 |
| CAPN14         | -0.02 | 9.36E-01 | 0.13  | 5.34E-01 |
| DDX28          | 0.33  | 8.64E-02 | 0.13  | 5.34E-01 |
| G555           | 0.09  | 6.34E-01 | 0.13  | 5.34E-01 |

|                      |       |          |       |          |
|----------------------|-------|----------|-------|----------|
| <b>ITPKB-IT1</b>     | -0.14 | 4.87E-01 | 0.13  | 5.34E-01 |
| <b>NEURL1</b>        | 0.13  | 5.19E-01 | 0.13  | 5.34E-01 |
| <b>RN7SL425P</b>     | 0.05  | 7.99E-01 | 0.13  | 5.34E-01 |
| <b>RNU7-115P</b>     | 0.06  | 7.54E-01 | 0.13  | 5.34E-01 |
| <b>RXRA</b>          | 0.13  | 5.14E-01 | 0.13  | 5.34E-01 |
| <b>SYNRG</b>         | -0.11 | 5.85E-01 | 0.13  | 5.34E-01 |
| <b>TXNRD1</b>        | 0.52  | 4.37E-03 | 0.13  | 5.34E-01 |
| <b>ZFYVE27</b>       | 0.20  | 3.02E-01 | 0.13  | 5.34E-01 |
| <b>AP001205.1</b>    | -0.11 | 5.67E-01 | 0.12  | 5.35E-01 |
| <b>BCL9</b>          | 0.08  | 6.96E-01 | 0.12  | 5.35E-01 |
| <b>DSCR3</b>         | 0.08  | 6.98E-01 | 0.12  | 5.35E-01 |
| <b>FAM35DP</b>       | -0.17 | 4.01E-01 | -0.12 | 5.35E-01 |
| <b>FAM46C</b>        | 0.17  | 4.00E-01 | -0.12 | 5.35E-01 |
| <b>FAM91A3P</b>      | -0.22 | 2.56E-01 | -0.12 | 5.35E-01 |
| <b>HCG4B</b>         | 0.05  | 8.18E-01 | 0.12  | 5.35E-01 |
| <b>KIN</b>           | 0.08  | 6.69E-01 | -0.12 | 5.35E-01 |
| <b>LAMA1</b>         | -0.19 | 3.24E-01 | -0.12 | 5.35E-01 |
| <b>LAMTOR2</b>       | -0.09 | 6.45E-01 | 0.12  | 5.35E-01 |
| <b>NUP58</b>         | 0.20  | 2.98E-01 | -0.12 | 5.35E-01 |
| <b>RASA2-IT1</b>     | 0.01  | 9.75E-01 | 0.12  | 5.35E-01 |
| <b>RN7SL182P</b>     | -0.33 | 8.18E-02 | 0.12  | 5.35E-01 |
| <b>RN7SL559P</b>     | -0.28 | 1.53E-01 | 0.12  | 5.35E-01 |
| <b>RNF113A</b>       | -0.04 | 8.30E-01 | 0.12  | 5.35E-01 |
| <b>RP11-15J10.1</b>  | 0.28  | 1.55E-01 | -0.12 | 5.35E-01 |
| <b>RP11-351O1.4</b>  | -0.05 | 8.16E-01 | -0.12 | 5.35E-01 |
| <b>RP11-406H23.5</b> | 0.01  | 9.78E-01 | -0.12 | 5.35E-01 |
| <b>RP11-74K11.2</b>  | -0.20 | 3.13E-01 | 0.12  | 5.35E-01 |
| <b>RP11-834C11.4</b> | -0.20 | 3.09E-01 | 0.12  | 5.35E-01 |
| <b>RP11-857B24.5</b> | -0.10 | 6.02E-01 | 0.12  | 5.35E-01 |
| <b>SH3BP1</b>        | 0.28  | 1.47E-01 | 0.12  | 5.35E-01 |
| <b>SLC9A3R1</b>      | 0.06  | 7.49E-01 | 0.12  | 5.35E-01 |
| <b>VPS54</b>         | 0.02  | 9.17E-01 | -0.12 | 5.35E-01 |
| <b>ZAR1</b>          | 0.08  | 6.94E-01 | 0.12  | 5.35E-01 |
| <b>ZDHHC20</b>       | 0.07  | 7.38E-01 | 0.12  | 5.35E-01 |
| <b>AC006195.2</b>    | 0.10  | 5.98E-01 | 0.12  | 5.36E-01 |
| <b>AC083843.2</b>    | -0.43 | 2.25E-02 | -0.12 | 5.36E-01 |
| <b>ANO7</b>          | -0.17 | 3.93E-01 | -0.12 | 5.36E-01 |
| <b>ATG10-AS1</b>     | -0.23 | 2.43E-01 | -0.12 | 5.36E-01 |
| <b>BBS12</b>         | -0.04 | 8.44E-01 | -0.12 | 5.36E-01 |
| <b>COA5</b>          | -0.21 | 2.78E-01 | -0.12 | 5.36E-01 |
| <b>CYCSP24</b>       | -0.18 | 3.49E-01 | -0.12 | 5.36E-01 |
| <b>DCUN1D2</b>       | 0.05  | 7.94E-01 | -0.12 | 5.36E-01 |
| <b>FOSL1</b>         | 0.25  | 1.98E-01 | 0.12  | 5.36E-01 |
| <b>HPSE</b>          | 0.28  | 1.46E-01 | 0.12  | 5.36E-01 |
| <b>IGHV3-9</b>       | 0.37  | 5.25E-02 | 0.12  | 5.36E-01 |
| <b>KCNAB3</b>        | 0.19  | 3.25E-01 | -0.12 | 5.36E-01 |
| <b>MEAF6</b>         | 0.01  | 9.63E-01 | -0.12 | 5.36E-01 |

|               |       |          |       |          |
|---------------|-------|----------|-------|----------|
| MYRFL         | 0.15  | 4.60E-01 | 0.12  | 5.36E-01 |
| NHLRC1        | 0.21  | 2.75E-01 | -0.12 | 5.36E-01 |
| PKP2          | -0.07 | 7.06E-01 | -0.12 | 5.36E-01 |
| RNU6-107P     | 0.08  | 6.86E-01 | -0.12 | 5.36E-01 |
| RP11-1096D5.2 | -0.31 | 1.06E-01 | -0.12 | 5.36E-01 |
| RP11-21L23.4  | -0.01 | 9.78E-01 | -0.12 | 5.36E-01 |
| RP11-243M5.2  | -0.05 | 8.16E-01 | -0.12 | 5.36E-01 |
| RP11-635N19.2 | -0.09 | 6.61E-01 | -0.12 | 5.36E-01 |
| RP11-691H4.4  | -0.03 | 8.92E-01 | 0.12  | 5.36E-01 |
| SLC22A18      | -0.09 | 6.47E-01 | -0.12 | 5.36E-01 |
| SNORA66       | 0.03  | 8.94E-01 | 0.12  | 5.36E-01 |
| TAS2R41       | -0.18 | 3.63E-01 | 0.12  | 5.36E-01 |
| TRBV4-2       | 0.32  | 9.36E-02 | 0.12  | 5.36E-01 |
| AC006014.8    | -0.19 | 3.45E-01 | -0.12 | 5.37E-01 |
| AC092301.3    | -0.04 | 8.33E-01 | -0.12 | 5.37E-01 |
| CHRM4         | -0.19 | 3.46E-01 | -0.12 | 5.37E-01 |
| CTA-14H9.5    | 0.00  | 9.99E-01 | -0.12 | 5.37E-01 |
| CTC-487M23.6  | 0.11  | 5.78E-01 | -0.12 | 5.37E-01 |
| CUBNP3        | -0.05 | 8.19E-01 | -0.12 | 5.37E-01 |
| GOLGA2P5      | -0.08 | 7.03E-01 | -0.12 | 5.37E-01 |
| HSPB11        | 0.05  | 7.83E-01 | -0.12 | 5.37E-01 |
| NBN           | 0.26  | 1.90E-01 | -0.12 | 5.37E-01 |
| RNU6-118P     | 0.30  | 1.16E-01 | -0.12 | 5.37E-01 |
| RNU6-202P     | 0.18  | 3.63E-01 | -0.12 | 5.37E-01 |
| RP11-313P13.5 | 0.06  | 7.81E-01 | -0.12 | 5.37E-01 |
| XLOC_008975   | 0.00  | 9.87E-01 | -0.12 | 5.37E-01 |
| XLOC_010475   | -0.19 | 3.44E-01 | -0.12 | 5.37E-01 |
| ZNF93         | 0.03  | 8.62E-01 | -0.12 | 5.37E-01 |
| APTR          | -0.09 | 6.44E-01 | 0.12  | 5.37E-01 |
| DLX6          | -0.14 | 4.84E-01 | 0.12  | 5.37E-01 |
| G5553         | 0.02  | 9.34E-01 | 0.12  | 5.37E-01 |
| PRELP         | -0.33 | 8.62E-02 | 0.12  | 5.37E-01 |
| RP11-265N7.2  | 0.05  | 7.97E-01 | 0.12  | 5.37E-01 |
| RP11-492M23.2 | -0.12 | 5.52E-01 | 0.12  | 5.37E-01 |
| RP5-967N21.11 | -0.20 | 3.10E-01 | 0.12  | 5.37E-01 |
| SLC13A4       | 0.21  | 2.94E-01 | 0.12  | 5.37E-01 |
| SNORD14E      | 0.46  | 1.39E-02 | 0.12  | 5.37E-01 |
| XLOC_001062   | 0.39  | 3.80E-02 | 0.12  | 5.37E-01 |
| AC002454.1    | 0.04  | 8.59E-01 | -0.12 | 5.38E-01 |
| AC007036.6    | 0.03  | 8.71E-01 | 0.12  | 5.38E-01 |
| ACP1          | 0.10  | 6.20E-01 | -0.12 | 5.38E-01 |
| AP001046.6    | -0.16 | 4.16E-01 | -0.12 | 5.38E-01 |
| C18orf21      | 0.08  | 6.78E-01 | 0.12  | 5.38E-01 |
| C7orf43       | 0.19  | 3.46E-01 | 0.12  | 5.38E-01 |
| CASKIN2       | 0.07  | 7.14E-01 | 0.12  | 5.38E-01 |
| CCL22         | 0.06  | 7.80E-01 | 0.12  | 5.38E-01 |
| FAM217A       | -0.04 | 8.59E-01 | -0.12 | 5.38E-01 |

|                       |       |          |       |          |
|-----------------------|-------|----------|-------|----------|
| <b>FRA10AC1</b>       | -0.11 | 5.84E-01 | -0.12 | 5.38E-01 |
| <b>GTF2B</b>          | 0.13  | 5.15E-01 | 0.12  | 5.38E-01 |
| <b>ILF2</b>           | 0.12  | 5.29E-01 | -0.12 | 5.38E-01 |
| <b>LINC01563</b>      | -0.04 | 8.55E-01 | 0.12  | 5.38E-01 |
| <b>MSX1</b>           | -0.21 | 2.78E-01 | 0.12  | 5.38E-01 |
| <b>NSMCE2</b>         | -0.05 | 7.94E-01 | -0.12 | 5.38E-01 |
| <b>NTN5</b>           | -0.03 | 8.99E-01 | -0.12 | 5.38E-01 |
| <b>PDGFRB</b>         | -0.19 | 3.33E-01 | 0.12  | 5.38E-01 |
| <b>RAB43P1</b>        | -0.23 | 2.44E-01 | 0.12  | 5.38E-01 |
| <b>RN7SL347P</b>      | -0.03 | 8.88E-01 | -0.12 | 5.38E-01 |
| <b>RP11-758N13.1</b>  | -0.05 | 8.00E-01 | -0.12 | 5.38E-01 |
| <b>RP11-83M16.6</b>   | -0.22 | 2.59E-01 | -0.12 | 5.38E-01 |
| <b>RP3-395M20.3</b>   | 0.02  | 9.18E-01 | -0.12 | 5.38E-01 |
| <b>SLC4A2</b>         | 0.00  | 9.87E-01 | 0.12  | 5.38E-01 |
| <b>TOPORS</b>         | 0.02  | 9.39E-01 | -0.12 | 5.38E-01 |
| <b>AC009299.1</b>     | -0.31 | 1.05E-01 | 0.12  | 5.39E-01 |
| <b>ALMS1-IT1</b>      | -0.24 | 2.15E-01 | -0.12 | 5.39E-01 |
| <b>BTF3</b>           | 0.04  | 8.54E-01 | 0.12  | 5.39E-01 |
| <b>C12orf76</b>       | -0.14 | 4.70E-01 | -0.12 | 5.39E-01 |
| <b>C18orf25</b>       | 0.12  | 5.33E-01 | -0.12 | 5.39E-01 |
| <b>CDS1</b>           | -0.04 | 8.59E-01 | -0.12 | 5.39E-01 |
| <b>CFAP43</b>         | -0.33 | 8.32E-02 | -0.12 | 5.39E-01 |
| <b>CRYZ</b>           | -0.11 | 5.91E-01 | -0.12 | 5.39E-01 |
| <b>FRMPD1</b>         | -0.11 | 5.66E-01 | 0.12  | 5.39E-01 |
| <b>G39546</b>         | -0.45 | 1.53E-02 | -0.12 | 5.39E-01 |
| <b>HSPD1P10</b>       | 0.00  | 9.92E-01 | -0.12 | 5.39E-01 |
| <b>ITGA9-AS1</b>      | -0.15 | 4.43E-01 | -0.12 | 5.39E-01 |
| <b>JCHAIN</b>         | 0.36  | 6.20E-02 | 0.12  | 5.39E-01 |
| <b>KB-1205A7.2</b>    | -0.19 | 3.21E-01 | -0.12 | 5.39E-01 |
| <b>LINC00638</b>      | 0.04  | 8.45E-01 | 0.12  | 5.39E-01 |
| <b>MANBAL</b>         | -0.12 | 5.31E-01 | 0.12  | 5.39E-01 |
| <b>MIR4644</b>        | -0.04 | 8.30E-01 | -0.12 | 5.39E-01 |
| <b>MIR936</b>         | -0.12 | 5.48E-01 | -0.12 | 5.39E-01 |
| <b>PCSK7</b>          | -0.19 | 3.37E-01 | 0.12  | 5.39E-01 |
| <b>PPP1R3E</b>        | -0.46 | 1.46E-02 | -0.12 | 5.39E-01 |
| <b>PRPH</b>           | -0.15 | 4.34E-01 | 0.12  | 5.39E-01 |
| <b>RN7SL535P</b>      | 0.39  | 4.25E-02 | -0.12 | 5.39E-01 |
| <b>RP11-222K16.1</b>  | 0.18  | 3.48E-01 | 0.12  | 5.39E-01 |
| <b>RP11-309L24.10</b> | 0.00  | 9.90E-01 | -0.12 | 5.39E-01 |
| <b>RP11-388C12.8</b>  | -0.05 | 8.03E-01 | -0.12 | 5.39E-01 |
| <b>RP11-457M11.7</b>  | -0.13 | 5.14E-01 | -0.12 | 5.39E-01 |
| <b>RP11-493G17.4</b>  | -0.31 | 1.08E-01 | -0.12 | 5.39E-01 |
| <b>RP11-783K16.5</b>  | 0.25  | 1.99E-01 | 0.12  | 5.39E-01 |
| <b>RRN3P1</b>         | -0.22 | 2.59E-01 | -0.12 | 5.39E-01 |
| <b>RTCA</b>           | 0.25  | 1.93E-01 | -0.12 | 5.39E-01 |
| <b>SLC35C2</b>        | 0.22  | 2.50E-01 | 0.12  | 5.39E-01 |
| <b>SPAST</b>          | 0.14  | 4.79E-01 | -0.12 | 5.39E-01 |

|               |       |          |       |          |
|---------------|-------|----------|-------|----------|
| SUN2          | -0.03 | 8.79E-01 | -0.12 | 5.39E-01 |
| TMEM192       | 0.06  | 7.50E-01 | -0.12 | 5.39E-01 |
| TRPM3         | 0.00  | 9.87E-01 | -0.12 | 5.39E-01 |
| VIP           | 0.00  | 9.81E-01 | 0.12  | 5.39E-01 |
| ZNF2          | -0.10 | 6.08E-01 | 0.12  | 5.39E-01 |
| ALKBH5        | -0.02 | 9.21E-01 | 0.12  | 5.40E-01 |
| AP000719.1    | 0.29  | 1.28E-01 | -0.12 | 5.40E-01 |
| CASK          | 0.19  | 3.43E-01 | 0.12  | 5.40E-01 |
| CTC-459F4.6   | 0.22  | 2.71E-01 | 0.12  | 5.40E-01 |
| CTD-2201G3.1  | 0.21  | 2.87E-01 | -0.12 | 5.40E-01 |
| CYCSP2        | 0.18  | 3.49E-01 | 0.12  | 5.40E-01 |
| FLJ33360      | -0.14 | 4.82E-01 | 0.12  | 5.40E-01 |
| HNRNPA3P12    | -0.18 | 3.53E-01 | 0.12  | 5.40E-01 |
| LRRC1         | 0.15  | 4.60E-01 | 0.12  | 5.40E-01 |
| MIR5010       | -0.18 | 3.59E-01 | -0.12 | 5.40E-01 |
| POF1B         | -0.20 | 3.11E-01 | -0.12 | 5.40E-01 |
| PRR7          | -0.03 | 8.93E-01 | -0.12 | 5.40E-01 |
| PSMC5         | 0.18  | 3.47E-01 | 0.12  | 5.40E-01 |
| RAET1L        | 0.23  | 2.45E-01 | 0.12  | 5.40E-01 |
| RNU6-254P     | 0.16  | 4.24E-01 | 0.12  | 5.40E-01 |
| RNU6-807P     | -0.04 | 8.32E-01 | -0.12 | 5.40E-01 |
| RP1-253P7.4   | 0.09  | 6.44E-01 | -0.12 | 5.40E-01 |
| RP11-138A9.2  | -0.13 | 5.01E-01 | -0.12 | 5.40E-01 |
| RP11-272D12.2 | -0.20 | 3.15E-01 | 0.12  | 5.40E-01 |
| RP11-51O6.1   | -0.07 | 7.11E-01 | 0.12  | 5.40E-01 |
| RPL21P44      | 0.05  | 8.03E-01 | -0.12 | 5.40E-01 |
| RPS10P18      | -0.17 | 3.95E-01 | 0.12  | 5.40E-01 |
| SLC34A2       | -0.30 | 1.24E-01 | -0.12 | 5.40E-01 |
| STAU1         | 0.15  | 4.46E-01 | 0.12  | 5.40E-01 |
| TECTA         | 0.09  | 6.63E-01 | -0.12 | 5.40E-01 |
| AC008746.5    | -0.01 | 9.67E-01 | 0.12  | 5.41E-01 |
| ALDH18A1      | 0.20  | 3.19E-01 | -0.12 | 5.41E-01 |
| ANP32AP1      | -0.38 | 4.64E-02 | -0.12 | 5.41E-01 |
| ATRX          | -0.10 | 6.03E-01 | -0.12 | 5.41E-01 |
| C9orf163      | -0.01 | 9.74E-01 | -0.12 | 5.41E-01 |
| CD74          | 0.18  | 3.69E-01 | 0.12  | 5.41E-01 |
| CDC5L         | 0.06  | 7.60E-01 | -0.12 | 5.41E-01 |
| CTC-359D24.3  | 0.13  | 5.00E-01 | 0.12  | 5.41E-01 |
| CTD-2282P23.2 | 0.01  | 9.60E-01 | 0.12  | 5.41E-01 |
| CTD-2529O21.1 | 0.27  | 1.72E-01 | 0.12  | 5.41E-01 |
| ENTPD2        | 0.08  | 6.85E-01 | -0.12 | 5.41E-01 |
| FAM173B       | 0.02  | 9.13E-01 | 0.12  | 5.41E-01 |
| G33960        | -0.12 | 5.56E-01 | -0.12 | 5.41E-01 |
| GPRC5A        | -0.45 | 1.68E-02 | 0.12  | 5.41E-01 |
| INSM2         | 0.04  | 8.44E-01 | 0.12  | 5.41E-01 |
| JAM3          | -0.02 | 9.37E-01 | -0.12 | 5.41E-01 |
| KB-1448A5.1   | 0.05  | 8.01E-01 | -0.12 | 5.41E-01 |



|               |       |          |       |          |
|---------------|-------|----------|-------|----------|
| LYPD5         | 0.25  | 2.08E-01 | 0.12  | 5.41E-01 |
| MAP1LC3A      | 0.01  | 9.44E-01 | 0.12  | 5.41E-01 |
| MORF4L1P1     | -0.20 | 3.20E-01 | 0.12  | 5.41E-01 |
| OSBPL6        | 0.05  | 8.13E-01 | -0.12 | 5.41E-01 |
| PGAM4         | -0.19 | 3.31E-01 | -0.12 | 5.41E-01 |
| PGLYRP3       | 0.18  | 3.50E-01 | 0.12  | 5.41E-01 |
| PSMB5         | 0.12  | 5.54E-01 | 0.12  | 5.41E-01 |
| RNU4-78P      | 0.03  | 8.95E-01 | -0.12 | 5.41E-01 |
| RP11-29H23.6  | -0.02 | 9.26E-01 | -0.12 | 5.41E-01 |
| RP11-446H18.5 | -0.19 | 3.39E-01 | -0.12 | 5.41E-01 |
| RP11-631M21.7 | -0.15 | 4.49E-01 | -0.12 | 5.41E-01 |
| SEC24C        | -0.03 | 8.79E-01 | 0.12  | 5.41E-01 |
| SF3A2         | -0.02 | 9.09E-01 | 0.12  | 5.41E-01 |
| SF3B4         | 0.07  | 7.21E-01 | 0.12  | 5.41E-01 |
| SLC30A7       | 0.34  | 7.92E-02 | -0.12 | 5.41E-01 |
| STAR          | 0.05  | 7.85E-01 | -0.12 | 5.41E-01 |
| TKT           | 0.14  | 4.78E-01 | 0.12  | 5.41E-01 |
| TUBG1P        | 0.09  | 6.49E-01 | -0.12 | 5.41E-01 |
| VIM-AS1       | -0.22 | 2.66E-01 | 0.12  | 5.41E-01 |
| XLOC_002956   | -0.30 | 1.17E-01 | 0.12  | 5.41E-01 |
| ZNF222        | -0.02 | 9.32E-01 | 0.12  | 5.41E-01 |
| BCL2A1        | 0.00  | 9.93E-01 | -0.12 | 5.42E-01 |
| BRIX1         | 0.13  | 5.01E-01 | -0.12 | 5.42E-01 |
| CTD-2561B21.3 | -0.01 | 9.63E-01 | -0.12 | 5.42E-01 |
| FAM196A       | -0.13 | 5.11E-01 | -0.12 | 5.42E-01 |
| G30960        | 0.02  | 9.02E-01 | -0.12 | 5.42E-01 |
| PRRT1         | -0.02 | 9.34E-01 | -0.12 | 5.42E-01 |
| R3HDM2        | 0.08  | 6.90E-01 | -0.12 | 5.42E-01 |
| RNU6-577P     | 0.02  | 9.08E-01 | -0.12 | 5.42E-01 |
| SDHCP2        | 0.02  | 9.14E-01 | -0.12 | 5.42E-01 |
| TFAP2A        | -0.14 | 4.72E-01 | -0.12 | 5.42E-01 |
| TMEM161B-AS1  | -0.21 | 2.79E-01 | -0.12 | 5.42E-01 |
| WHAMMP3       | -0.24 | 2.22E-01 | -0.12 | 5.42E-01 |
| AC083949.1    | 0.16  | 4.24E-01 | 0.12  | 5.42E-01 |
| CDIPT-AS1     | 0.08  | 6.98E-01 | 0.12  | 5.42E-01 |
| CYP51A1P3     | 0.46  | 1.31E-02 | 0.12  | 5.42E-01 |
| FAM86KP       | -0.03 | 8.77E-01 | 0.12  | 5.42E-01 |
| HLA-H         | 0.22  | 2.68E-01 | 0.12  | 5.42E-01 |
| KITLG         | -0.02 | 9.13E-01 | 0.12  | 5.42E-01 |
| NONO          | 0.14  | 4.82E-01 | 0.12  | 5.42E-01 |
| RP11-359E10.1 | 0.18  | 3.70E-01 | 0.12  | 5.42E-01 |
| RP11-778D9.4  | 0.03  | 8.76E-01 | 0.12  | 5.42E-01 |
| SALL2         | 0.09  | 6.67E-01 | 0.12  | 5.42E-01 |
| TELO2         | 0.02  | 9.06E-01 | 0.12  | 5.42E-01 |
| XLOC_012747   | -0.18 | 3.62E-01 | 0.12  | 5.42E-01 |
| XLOC_013958   | 0.29  | 1.29E-01 | 0.12  | 5.42E-01 |
| AC114765.2    | -0.17 | 3.83E-01 | -0.12 | 5.43E-01 |

|               |       |          |       |          |
|---------------|-------|----------|-------|----------|
| ATR           | 0.16  | 4.29E-01 | -0.12 | 5.43E-01 |
| C3orf35       | -0.25 | 2.04E-01 | -0.12 | 5.43E-01 |
| DSTNP1        | -0.03 | 8.66E-01 | -0.12 | 5.43E-01 |
| EDEM1         | 0.32  | 9.93E-02 | 0.12  | 5.43E-01 |
| ERICH5        | 0.42  | 2.68E-02 | -0.12 | 5.43E-01 |
| G33057        | -0.27 | 1.72E-01 | 0.12  | 5.43E-01 |
| GPM6A         | -0.28 | 1.55E-01 | -0.12 | 5.43E-01 |
| GSTO1         | 0.07  | 7.32E-01 | 0.12  | 5.43E-01 |
| GTF2E1        | 0.20  | 3.04E-01 | 0.12  | 5.43E-01 |
| H1FX-AS1      | -0.15 | 4.40E-01 | 0.12  | 5.43E-01 |
| H2AFZP6       | 0.03  | 8.91E-01 | -0.12 | 5.43E-01 |
| ITM2BP1       | 0.05  | 7.89E-01 | 0.12  | 5.43E-01 |
| KRT73         | -0.17 | 3.96E-01 | -0.12 | 5.43E-01 |
| LINC00486     | 0.19  | 3.39E-01 | -0.12 | 5.43E-01 |
| NOB1          | -0.01 | 9.47E-01 | 0.12  | 5.43E-01 |
| PADI2         | 0.22  | 2.68E-01 | 0.12  | 5.43E-01 |
| RDH14         | 0.11  | 5.85E-01 | -0.12 | 5.43E-01 |
| RHBG          | -0.01 | 9.45E-01 | -0.12 | 5.43E-01 |
| RP11-177N22.3 | -0.05 | 8.18E-01 | 0.12  | 5.43E-01 |
| RP11-178L8.9  | -0.17 | 3.93E-01 | 0.12  | 5.43E-01 |
| RP11-417L19.5 | 0.04  | 8.54E-01 | -0.12 | 5.43E-01 |
| RP11-44F14.6  | -0.05 | 8.10E-01 | -0.12 | 5.43E-01 |
| RP11-498C9.12 | 0.06  | 7.60E-01 | -0.12 | 5.43E-01 |
| RP11-521I8.1  | 0.00  | 9.85E-01 | -0.12 | 5.43E-01 |
| RP11-715F3.2  | 0.12  | 5.50E-01 | -0.12 | 5.43E-01 |
| RPL36AP15     | 0.15  | 4.61E-01 | 0.12  | 5.43E-01 |
| TOP3B         | 0.23  | 2.45E-01 | -0.12 | 5.43E-01 |
| USP47         | 0.27  | 1.63E-01 | 0.12  | 5.43E-01 |
| ZNF544        | 0.07  | 7.06E-01 | -0.12 | 5.43E-01 |
| ZNF891        | 0.01  | 9.75E-01 | -0.12 | 5.43E-01 |
| AAMDC         | -0.18 | 3.60E-01 | 0.12  | 5.44E-01 |
| AC007879.1    | -0.11 | 5.79E-01 | 0.12  | 5.44E-01 |
| AC093642.1    | -0.19 | 3.31E-01 | -0.12 | 5.44E-01 |
| BGLAP         | -0.24 | 2.16E-01 | -0.12 | 5.44E-01 |
| C9orf147      | -0.07 | 7.06E-01 | -0.12 | 5.44E-01 |
| CAD           | -0.02 | 9.25E-01 | 0.12  | 5.44E-01 |
| CASQ1         | -0.09 | 6.44E-01 | 0.12  | 5.44E-01 |
| COL27A1       | -0.08 | 6.82E-01 | 0.12  | 5.44E-01 |
| CTC-444N24.6  | -0.29 | 1.36E-01 | 0.12  | 5.44E-01 |
| CTD-2213F21.2 | -0.12 | 5.36E-01 | 0.12  | 5.44E-01 |
| G16361        | -0.06 | 7.75E-01 | 0.12  | 5.44E-01 |
| ICA1          | -0.11 | 5.64E-01 | 0.12  | 5.44E-01 |
| KIAA0556      | -0.38 | 4.78E-02 | 0.12  | 5.44E-01 |
| LITAF         | 0.02  | 9.16E-01 | 0.12  | 5.44E-01 |
| LTA4H         | 0.10  | 6.13E-01 | 0.12  | 5.44E-01 |
| LUC7L         | -0.08 | 6.79E-01 | -0.12 | 5.44E-01 |
| MRFAP1        | 0.18  | 3.49E-01 | 0.12  | 5.44E-01 |

|                |       |          |       |          |
|----------------|-------|----------|-------|----------|
| PEAK1          | -0.21 | 2.80E-01 | -0.12 | 5.44E-01 |
| PFN4           | 0.12  | 5.55E-01 | -0.12 | 5.44E-01 |
| PIGO           | 0.14  | 4.72E-01 | 0.12  | 5.44E-01 |
| PITRM1-AS1     | 0.10  | 6.09E-01 | -0.12 | 5.44E-01 |
| PLXNA3         | 0.04  | 8.27E-01 | -0.12 | 5.44E-01 |
| PPP4R3A        | -0.11 | 5.71E-01 | -0.12 | 5.44E-01 |
| RNY4P25        | 0.04  | 8.41E-01 | 0.12  | 5.44E-01 |
| RP11-128P10.1  | -0.02 | 9.04E-01 | -0.12 | 5.44E-01 |
| RP11-135A1.2   | -0.12 | 5.48E-01 | 0.12  | 5.44E-01 |
| RP11-262H14.11 | -0.27 | 1.66E-01 | -0.12 | 5.44E-01 |
| RP11-402P6.9   | 0.17  | 4.00E-01 | 0.12  | 5.44E-01 |
| RP11-569A11.1  | -0.03 | 8.69E-01 | 0.12  | 5.44E-01 |
| RP11-973N13.4  | -0.02 | 9.37E-01 | -0.12 | 5.44E-01 |
| RP4-647J21.1   | -0.02 | 9.35E-01 | 0.12  | 5.44E-01 |
| TMEM216        | 0.19  | 3.34E-01 | -0.12 | 5.44E-01 |
| TMEM254-AS1    | 0.12  | 5.40E-01 | 0.12  | 5.44E-01 |
| ZNF354C        | 0.03  | 8.90E-01 | -0.12 | 5.44E-01 |
| ABCC5-AS1      | -0.15 | 4.41E-01 | -0.12 | 5.45E-01 |
| ADNP-AS1       | -0.12 | 5.50E-01 | -0.12 | 5.45E-01 |
| AKR1C2         | -0.03 | 8.98E-01 | -0.12 | 5.45E-01 |
| CCDC64         | -0.08 | 6.81E-01 | -0.12 | 5.45E-01 |
| CHD9           | 0.25  | 1.98E-01 | -0.12 | 5.45E-01 |
| DCST1          | -0.05 | 7.94E-01 | -0.12 | 5.45E-01 |
| EMX2           | -0.16 | 4.24E-01 | -0.12 | 5.45E-01 |
| FTLP3          | 0.08  | 6.82E-01 | -0.12 | 5.45E-01 |
| G21031         | -0.01 | 9.72E-01 | -0.12 | 5.45E-01 |
| G35308         | 0.02  | 9.21E-01 | -0.12 | 5.45E-01 |
| KDM1B          | -0.11 | 5.84E-01 | -0.12 | 5.45E-01 |
| LRRN2          | -0.04 | 8.55E-01 | -0.12 | 5.45E-01 |
| MGAT3          | 0.03  | 8.61E-01 | -0.12 | 5.45E-01 |
| MYO1B          | -0.03 | 8.80E-01 | -0.12 | 5.45E-01 |
| NFYC-AS1       | -0.09 | 6.62E-01 | -0.12 | 5.45E-01 |
| NUDT1          | 0.10  | 5.97E-01 | -0.12 | 5.45E-01 |
| RGS7BP         | 0.04  | 8.53E-01 | -0.12 | 5.45E-01 |
| RP11-21M7.2    | 0.09  | 6.52E-01 | -0.12 | 5.45E-01 |
| RP11-407G23.7  | 0.03  | 8.98E-01 | -0.12 | 5.45E-01 |
| RP11-709A23.1  | -0.30 | 1.24E-01 | -0.12 | 5.45E-01 |
| RP11-734K2.4   | 0.02  | 9.32E-01 | -0.12 | 5.45E-01 |
| RP11-817I4.2   | 0.28  | 1.44E-01 | -0.12 | 5.45E-01 |
| RP11-83M16.4   | -0.15 | 4.54E-01 | -0.12 | 5.45E-01 |
| TGFBR3         | -0.14 | 4.92E-01 | -0.12 | 5.45E-01 |
| TIMM44         | 0.18  | 3.63E-01 | -0.12 | 5.45E-01 |
| AC010468.1     | 0.18  | 3.46E-01 | 0.12  | 5.45E-01 |
| ALG13-AS1      | -0.23 | 2.41E-01 | 0.12  | 5.45E-01 |
| CHST12         | 0.10  | 6.21E-01 | 0.12  | 5.45E-01 |
| COG4           | 0.20  | 2.96E-01 | 0.12  | 5.45E-01 |
| DSC1           | -0.03 | 8.95E-01 | 0.12  | 5.45E-01 |

|               |       |          |       |          |
|---------------|-------|----------|-------|----------|
| EIF2B2        | 0.34  | 8.13E-02 | 0.12  | 5.45E-01 |
| FNDC8         | 0.06  | 7.58E-01 | 0.12  | 5.45E-01 |
| GLUD2         | -0.19 | 3.38E-01 | 0.12  | 5.45E-01 |
| GNRHR2        | -0.08 | 6.85E-01 | 0.12  | 5.45E-01 |
| HNRNPA1P50    | -0.20 | 3.00E-01 | 0.12  | 5.45E-01 |
| IGHV3-23      | 0.30  | 1.22E-01 | 0.12  | 5.45E-01 |
| KB-226F1.1    | -0.18 | 3.66E-01 | 0.12  | 5.45E-01 |
| MIR3177       | 0.21  | 2.78E-01 | 0.12  | 5.45E-01 |
| MTMR14        | 0.03  | 8.71E-01 | 0.12  | 5.45E-01 |
| NRIR          | -0.05 | 8.14E-01 | 0.12  | 5.45E-01 |
| NUDT8         | 0.17  | 3.79E-01 | 0.12  | 5.45E-01 |
| RBM45         | -0.20 | 3.06E-01 | 0.12  | 5.45E-01 |
| RP11-174N3.4  | 0.23  | 2.45E-01 | 0.12  | 5.45E-01 |
| RP11-404O13.5 | -0.31 | 1.07E-01 | 0.12  | 5.45E-01 |
| SEMA3G        | -0.28 | 1.45E-01 | 0.12  | 5.45E-01 |
| SOSTDC1       | 0.47  | 1.09E-02 | 0.12  | 5.45E-01 |
| AC011498.1    | -0.23 | 2.30E-01 | 0.12  | 5.46E-01 |
| C10orf11      | -0.41 | 3.13E-02 | 0.12  | 5.46E-01 |
| C20orf203     | -0.30 | 1.23E-01 | -0.12 | 5.46E-01 |
| CTD-2017C7.2  | -0.12 | 5.31E-01 | -0.12 | 5.46E-01 |
| CYCSP10       | 0.09  | 6.57E-01 | -0.12 | 5.46E-01 |
| DUOXA2        | -0.14 | 4.79E-01 | 0.12  | 5.46E-01 |
| H2AFZ         | 0.08  | 6.96E-01 | -0.12 | 5.46E-01 |
| HEXIM1        | 0.01  | 9.59E-01 | 0.12  | 5.46E-01 |
| IGLC7         | 0.37  | 5.25E-02 | 0.12  | 5.46E-01 |
| LRRC46        | -0.03 | 8.82E-01 | -0.12 | 5.46E-01 |
| MAFIP         | -0.10 | 6.25E-01 | 0.12  | 5.46E-01 |
| MIR3679       | -0.03 | 8.62E-01 | -0.12 | 5.46E-01 |
| MOG           | 0.03  | 8.74E-01 | 0.12  | 5.46E-01 |
| NDUFA3P2      | -0.04 | 8.51E-01 | -0.12 | 5.46E-01 |
| NGFRAP1       | 0.17  | 3.87E-01 | 0.12  | 5.46E-01 |
| OR5P1P        | -0.29 | 1.36E-01 | -0.12 | 5.46E-01 |
| PARVB         | -0.30 | 1.22E-01 | -0.12 | 5.46E-01 |
| PDCD6IPP2     | -0.02 | 9.27E-01 | 0.12  | 5.46E-01 |
| PLS3          | -0.02 | 9.25E-01 | -0.12 | 5.46E-01 |
| PTTG4P        | 0.01  | 9.55E-01 | 0.12  | 5.46E-01 |
| RP11-307P22.1 | -0.14 | 4.72E-01 | -0.12 | 5.46E-01 |
| RP11-465B22.3 | -0.12 | 5.37E-01 | -0.12 | 5.46E-01 |
| RP11-529H22.1 | 0.10  | 5.96E-01 | -0.12 | 5.46E-01 |
| RP11-85G20.2  | -0.16 | 4.24E-01 | 0.12  | 5.46E-01 |
| RP4-564F22.5  | 0.14  | 4.78E-01 | -0.12 | 5.46E-01 |
| SHISA7        | -0.11 | 5.68E-01 | -0.12 | 5.46E-01 |
| UBL3          | 0.04  | 8.48E-01 | -0.12 | 5.46E-01 |
| ZNF29P        | 0.03  | 8.82E-01 | 0.12  | 5.46E-01 |
| ZNF559        | -0.10 | 6.07E-01 | 0.12  | 5.46E-01 |
| AC019201.1    | -0.15 | 4.59E-01 | -0.12 | 5.47E-01 |
| AC097493.1    | -0.24 | 2.23E-01 | -0.12 | 5.47E-01 |

|                      |       |          |       |          |
|----------------------|-------|----------|-------|----------|
| <b>AC124997.1</b>    | -0.04 | 8.31E-01 | -0.12 | 5.47E-01 |
| <b>ADGRE1</b>        | -0.08 | 6.84E-01 | 0.12  | 5.47E-01 |
| <b>ADIPOQ</b>        | -0.19 | 3.45E-01 | -0.12 | 5.47E-01 |
| <b>C12orf45</b>      | 0.20  | 3.16E-01 | -0.12 | 5.47E-01 |
| <b>DNM3-IT1</b>      | -0.15 | 4.43E-01 | -0.12 | 5.47E-01 |
| <b>DPP8</b>          | 0.04  | 8.53E-01 | -0.12 | 5.47E-01 |
| <b>DYNC1I2</b>       | 0.01  | 9.76E-01 | 0.12  | 5.47E-01 |
| <b>GABRB3</b>        | 0.06  | 7.55E-01 | 0.12  | 5.47E-01 |
| <b>GCNT1</b>         | -0.03 | 8.70E-01 | 0.12  | 5.47E-01 |
| <b>LINC01125</b>     | -0.07 | 7.42E-01 | -0.12 | 5.47E-01 |
| <b>OR7E62P</b>       | 0.35  | 6.70E-02 | 0.12  | 5.47E-01 |
| <b>PNPLA1</b>        | -0.21 | 2.78E-01 | 0.12  | 5.47E-01 |
| <b>PNPT1P1</b>       | 0.05  | 7.94E-01 | -0.12 | 5.47E-01 |
| <b>RBM23</b>         | 0.10  | 6.14E-01 | 0.12  | 5.47E-01 |
| <b>RNU6-762P</b>     | 0.29  | 1.31E-01 | -0.12 | 5.47E-01 |
| <b>RP11-142C4.6</b>  | -0.01 | 9.67E-01 | 0.12  | 5.47E-01 |
| <b>RP11-254F7.2</b>  | 0.02  | 9.29E-01 | -0.12 | 5.47E-01 |
| <b>RP11-401L13.4</b> | 0.10  | 6.28E-01 | -0.12 | 5.47E-01 |
| <b>RP11-439A17.7</b> | 0.10  | 6.01E-01 | 0.12  | 5.47E-01 |
| <b>RP11-879F14.3</b> | -0.08 | 7.00E-01 | -0.12 | 5.47E-01 |
| <b>RP4-545K15.5</b>  | -0.08 | 6.77E-01 | -0.12 | 5.47E-01 |
| <b>SDR39U1</b>       | -0.06 | 7.55E-01 | 0.12  | 5.47E-01 |
| <b>TCTE3</b>         | -0.06 | 7.64E-01 | -0.12 | 5.47E-01 |
| <b>TMEM110</b>       | -0.02 | 9.15E-01 | 0.12  | 5.47E-01 |
| <b>VWA8-AS1</b>      | 0.12  | 5.50E-01 | -0.12 | 5.47E-01 |
| <b>XLOC_002951</b>   | -0.08 | 6.89E-01 | -0.12 | 5.47E-01 |
| <b>ZFP62</b>         | 0.13  | 5.07E-01 | 0.12  | 5.47E-01 |
| <b>ZNF276</b>        | -0.10 | 6.30E-01 | -0.12 | 5.47E-01 |
| <b>ZNF491</b>        | 0.17  | 3.88E-01 | 0.12  | 5.47E-01 |
| <b>ZNF576</b>        | 0.27  | 1.72E-01 | 0.12  | 5.47E-01 |
| <b>AC010127.3</b>    | -0.13 | 5.10E-01 | -0.12 | 5.48E-01 |
| <b>ANKRD30BP3</b>    | 0.15  | 4.34E-01 | -0.12 | 5.48E-01 |
| <b>B3GLCT</b>        | -0.02 | 9.31E-01 | 0.12  | 5.48E-01 |
| <b>C6orf47</b>       | 0.09  | 6.63E-01 | 0.12  | 5.48E-01 |
| <b>CFD</b>           | -0.10 | 6.26E-01 | -0.12 | 5.48E-01 |
| <b>CLDN24</b>        | -0.23 | 2.40E-01 | -0.12 | 5.48E-01 |
| <b>CYP4F26P</b>      | -0.15 | 4.48E-01 | -0.12 | 5.48E-01 |
| <b>KANK2</b>         | -0.28 | 1.56E-01 | 0.12  | 5.48E-01 |
| <b>MED26</b>         | -0.19 | 3.30E-01 | 0.12  | 5.48E-01 |
| <b>NAALADL2-AS3</b>  | -0.05 | 8.07E-01 | 0.12  | 5.48E-01 |
| <b>OR5BA1P</b>       | -0.25 | 2.02E-01 | 0.12  | 5.48E-01 |
| <b>PODN</b>          | -0.11 | 5.71E-01 | 0.12  | 5.48E-01 |
| <b>RAPGEF4</b>       | 0.12  | 5.48E-01 | -0.12 | 5.48E-01 |
| <b>RNF167</b>        | 0.10  | 6.18E-01 | 0.12  | 5.48E-01 |
| <b>RP11-280O24.3</b> | 0.08  | 6.84E-01 | 0.12  | 5.48E-01 |
| <b>RP11-423O2.2</b>  | 0.01  | 9.47E-01 | 0.12  | 5.48E-01 |
| <b>RP11-507K2.2</b>  | -0.18 | 3.60E-01 | -0.12 | 5.48E-01 |

|                      |       |          |       |          |
|----------------------|-------|----------|-------|----------|
| <b>RP11-76P2.4</b>   | -0.26 | 1.80E-01 | -0.12 | 5.48E-01 |
| <b>SETD4</b>         | 0.05  | 8.02E-01 | -0.12 | 5.48E-01 |
| <b>SSXP10</b>        | -0.04 | 8.45E-01 | -0.12 | 5.48E-01 |
| <b>VNN2</b>          | 0.09  | 6.53E-01 | -0.12 | 5.48E-01 |
| <b>XLOC_005550</b>   | -0.15 | 4.51E-01 | -0.12 | 5.48E-01 |
| <b>ADM5</b>          | 0.05  | 8.14E-01 | 0.12  | 5.49E-01 |
| <b>AGAP10</b>        | -0.12 | 5.56E-01 | -0.12 | 5.49E-01 |
| <b>AJ003147.11</b>   | 0.02  | 9.36E-01 | 0.12  | 5.49E-01 |
| <b>AL136115.1</b>    | -0.03 | 8.86E-01 | 0.12  | 5.49E-01 |
| <b>AP000807.2</b>    | -0.03 | 8.88E-01 | 0.12  | 5.49E-01 |
| <b>ATF7IP2</b>       | 0.06  | 7.58E-01 | 0.12  | 5.49E-01 |
| <b>ATP8B3</b>        | 0.17  | 3.89E-01 | 0.12  | 5.49E-01 |
| <b>BICD1</b>         | -0.12 | 5.42E-01 | -0.12 | 5.49E-01 |
| <b>BUB1</b>          | 0.11  | 5.72E-01 | 0.12  | 5.49E-01 |
| <b>CPO</b>           | -0.02 | 9.04E-01 | 0.12  | 5.49E-01 |
| <b>DNA2</b>          | 0.15  | 4.46E-01 | -0.12 | 5.49E-01 |
| <b>DNAJC14</b>       | 0.08  | 6.75E-01 | 0.12  | 5.49E-01 |
| <b>FAM57B</b>        | 0.09  | 6.51E-01 | -0.12 | 5.49E-01 |
| <b>FAM71F2</b>       | 0.03  | 8.76E-01 | -0.12 | 5.49E-01 |
| <b>G27759</b>        | 0.14  | 4.83E-01 | 0.12  | 5.49E-01 |
| <b>GABRR1</b>        | 0.24  | 2.27E-01 | 0.12  | 5.49E-01 |
| <b>MAP2K2</b>        | 0.19  | 3.29E-01 | 0.12  | 5.49E-01 |
| <b>OR10J2P</b>       | -0.09 | 6.51E-01 | -0.12 | 5.49E-01 |
| <b>OSBPL5</b>        | 0.19  | 3.41E-01 | 0.12  | 5.49E-01 |
| <b>POLR3H</b>        | 0.28  | 1.53E-01 | 0.12  | 5.49E-01 |
| <b>PPFIA4</b>        | -0.09 | 6.45E-01 | 0.12  | 5.49E-01 |
| <b>PYDC1</b>         | -0.09 | 6.34E-01 | 0.12  | 5.49E-01 |
| <b>RP11-217B7.2</b>  | 0.24  | 2.13E-01 | 0.12  | 5.49E-01 |
| <b>RP11-353K11.1</b> | -0.03 | 8.97E-01 | -0.12 | 5.49E-01 |
| <b>RP11-44F14.2</b>  | 0.11  | 5.76E-01 | 0.12  | 5.49E-01 |
| <b>RP11-488I20.9</b> | 0.12  | 5.52E-01 | -0.12 | 5.49E-01 |
| <b>RP11-648O15.2</b> | -0.23 | 2.47E-01 | -0.12 | 5.49E-01 |
| <b>RP4-706A16.3</b>  | -0.30 | 1.22E-01 | -0.12 | 5.49E-01 |
| <b>SPRR1B</b>        | 0.09  | 6.33E-01 | 0.12  | 5.49E-01 |
| <b>TAF5L</b>         | 0.18  | 3.55E-01 | -0.12 | 5.49E-01 |
| <b>TMEM50A</b>       | 0.12  | 5.49E-01 | 0.12  | 5.49E-01 |
| <b>VPS36</b>         | -0.04 | 8.50E-01 | -0.12 | 5.49E-01 |
| <b>AADACL2-AS1</b>   | -0.23 | 2.50E-01 | 0.12  | 5.50E-01 |
| <b>AC002310.14</b>   | -0.41 | 2.97E-02 | 0.12  | 5.50E-01 |
| <b>AC005488.11</b>   | -0.12 | 5.46E-01 | -0.12 | 5.50E-01 |
| <b>AC005822.1</b>    | -0.13 | 4.94E-01 | 0.12  | 5.50E-01 |
| <b>AC019181.3</b>    | 0.11  | 5.67E-01 | 0.12  | 5.50E-01 |
| <b>AC073063.10</b>   | -0.05 | 7.91E-01 | 0.12  | 5.50E-01 |
| <b>ACMSD</b>         | -0.14 | 4.66E-01 | -0.12 | 5.50E-01 |
| <b>ACOT9</b>         | -0.01 | 9.74E-01 | -0.12 | 5.50E-01 |
| <b>ANO10</b>         | 0.21  | 2.74E-01 | 0.12  | 5.50E-01 |
| <b>CTB-102L5.8</b>   | 0.30  | 1.15E-01 | -0.12 | 5.50E-01 |

|                      |       |          |       |          |
|----------------------|-------|----------|-------|----------|
| <b>CTB-113I20.2</b>  | -0.09 | 6.66E-01 | 0.12  | 5.50E-01 |
| <b>CTD-2197I11.1</b> | 0.18  | 3.61E-01 | -0.12 | 5.50E-01 |
| <b>CTD-2547G23.4</b> | 0.05  | 8.12E-01 | -0.12 | 5.50E-01 |
| <b>DNMBP-AS1</b>     | 0.25  | 1.93E-01 | -0.12 | 5.50E-01 |
| <b>EPG5</b>          | -0.08 | 6.80E-01 | 0.12  | 5.50E-01 |
| <b>FBLN2</b>         | -0.15 | 4.54E-01 | 0.12  | 5.50E-01 |
| <b>FTH1P24</b>       | -0.06 | 7.47E-01 | -0.12 | 5.50E-01 |
| <b>G35863</b>        | 0.25  | 2.04E-01 | -0.12 | 5.50E-01 |
| <b>G36839</b>        | 0.05  | 7.83E-01 | -0.12 | 5.50E-01 |
| <b>GLT8D1</b>        | -0.07 | 7.16E-01 | 0.12  | 5.50E-01 |
| <b>GS1-293C5.1</b>   | 0.00  | 9.86E-01 | -0.12 | 5.50E-01 |
| <b>H1FX</b>          | -0.02 | 9.09E-01 | 0.12  | 5.50E-01 |
| <b>IFITM2</b>        | -0.21 | 2.73E-01 | 0.12  | 5.50E-01 |
| <b>MAN2A2</b>        | -0.28 | 1.43E-01 | -0.12 | 5.50E-01 |
| <b>MUC1</b>          | 0.19  | 3.39E-01 | -0.12 | 5.50E-01 |
| <b>NME7</b>          | 0.22  | 2.58E-01 | -0.12 | 5.50E-01 |
| <b>NPIP6</b>         | -0.11 | 5.73E-01 | -0.12 | 5.50E-01 |
| <b>NTS</b>           | -0.03 | 8.64E-01 | -0.12 | 5.50E-01 |
| <b>POLR1C</b>        | 0.25  | 1.93E-01 | -0.12 | 5.50E-01 |
| <b>RNU6-516P</b>     | -0.09 | 6.65E-01 | 0.12  | 5.50E-01 |
| <b>RP11-100G15.3</b> | -0.34 | 7.79E-02 | 0.12  | 5.50E-01 |
| <b>RP11-119J18.1</b> | 0.06  | 7.77E-01 | -0.12 | 5.50E-01 |
| <b>RP11-17M24.1</b>  | -0.03 | 8.71E-01 | 0.12  | 5.50E-01 |
| <b>RP11-507J18.5</b> | 0.26  | 1.90E-01 | -0.12 | 5.50E-01 |
| <b>RP11-731C17.2</b> | 0.09  | 6.58E-01 | 0.12  | 5.50E-01 |
| <b>RP11-84C10.3</b>  | -0.26 | 1.86E-01 | -0.12 | 5.50E-01 |
| <b>SHCBP1</b>        | -0.06 | 7.69E-01 | 0.12  | 5.50E-01 |
| <b>SPDYC</b>         | -0.24 | 2.14E-01 | -0.12 | 5.50E-01 |
| <b>TACSTD2</b>       | 0.08  | 6.78E-01 | -0.12 | 5.50E-01 |
| <b>TDP1</b>          | 0.09  | 6.58E-01 | -0.12 | 5.50E-01 |
| <b>TENM4</b>         | -0.09 | 6.33E-01 | -0.12 | 5.50E-01 |
| <b>XLOC_009503</b>   | -0.14 | 4.66E-01 | 0.12  | 5.50E-01 |
| <b>ZNF280A</b>       | -0.23 | 2.33E-01 | -0.12 | 5.50E-01 |
| <b>AC005550.3</b>    | -0.43 | 2.34E-02 | -0.12 | 5.51E-01 |
| <b>AC138744.2</b>    | 0.10  | 6.27E-01 | -0.12 | 5.51E-01 |
| <b>AP000487.4</b>    | 0.03  | 8.95E-01 | -0.12 | 5.51E-01 |
| <b>ARL8A</b>         | -0.06 | 7.60E-01 | -0.12 | 5.51E-01 |
| <b>ASAH2B</b>        | -0.03 | 8.71E-01 | 0.12  | 5.51E-01 |
| <b>ATL2</b>          | 0.09  | 6.54E-01 | -0.12 | 5.51E-01 |
| <b>AZIN1-AS1</b>     | -0.13 | 5.18E-01 | 0.12  | 5.51E-01 |
| <b>B3GALT4</b>       | -0.05 | 8.05E-01 | 0.12  | 5.51E-01 |
| <b>BRAP</b>          | -0.16 | 4.04E-01 | 0.12  | 5.51E-01 |
| <b>CD9</b>           | 0.01  | 9.60E-01 | 0.12  | 5.51E-01 |
| <b>CDC6</b>          | -0.17 | 3.89E-01 | -0.12 | 5.51E-01 |
| <b>CRYBB3</b>        | -0.01 | 9.53E-01 | -0.12 | 5.51E-01 |
| <b>DPY19L2</b>       | -0.34 | 7.49E-02 | -0.12 | 5.51E-01 |
| <b>EHD4-AS1</b>      | -0.16 | 4.23E-01 | 0.12  | 5.51E-01 |

|                      |       |          |       |          |
|----------------------|-------|----------|-------|----------|
| <b>METTL23</b>       | 0.01  | 9.79E-01 | 0.12  | 5.51E-01 |
| <b>MTND4P26</b>      | 0.08  | 6.97E-01 | 0.12  | 5.51E-01 |
| <b>RIN1</b>          | 0.46  | 1.33E-02 | 0.12  | 5.51E-01 |
| <b>RP1-292B18.3</b>  | -0.27 | 1.66E-01 | -0.12 | 5.51E-01 |
| <b>RP11-10E18.7</b>  | -0.13 | 5.00E-01 | -0.12 | 5.51E-01 |
| <b>RP11-169K16.8</b> | 0.40  | 3.65E-02 | -0.12 | 5.51E-01 |
| <b>RP11-190D6.1</b>  | 0.33  | 8.34E-02 | 0.12  | 5.51E-01 |
| <b>RP11-368N21.5</b> | -0.05 | 8.11E-01 | -0.12 | 5.51E-01 |
| <b>RP11-405O10.2</b> | 0.12  | 5.47E-01 | -0.12 | 5.51E-01 |
| <b>RP11-686D22.4</b> | 0.30  | 1.20E-01 | -0.12 | 5.51E-01 |
| <b>RP11-697N18.4</b> | 0.07  | 7.40E-01 | 0.12  | 5.51E-01 |
| <b>RP4-782L23.2</b>  | 0.10  | 6.13E-01 | -0.12 | 5.51E-01 |
| <b>SLC25A13</b>      | 0.18  | 3.49E-01 | -0.12 | 5.51E-01 |
| <b>TNFRSF10A</b>     | 0.25  | 1.92E-01 | 0.12  | 5.51E-01 |
| <b>UROS</b>          | -0.09 | 6.64E-01 | 0.12  | 5.51E-01 |
| <b>VTN</b>           | 0.14  | 4.85E-01 | -0.12 | 5.51E-01 |
| <b>ANKRD20A11P</b>   | -0.39 | 3.95E-02 | -0.12 | 5.52E-01 |
| <b>EXOSC8</b>        | 0.03  | 8.68E-01 | -0.12 | 5.52E-01 |
| <b>G35698</b>        | -0.07 | 7.29E-01 | -0.12 | 5.52E-01 |
| <b>HOXA10</b>        | -0.14 | 4.92E-01 | -0.12 | 5.52E-01 |
| <b>KCNN2</b>         | -0.29 | 1.35E-01 | -0.12 | 5.52E-01 |
| <b>MIR4768</b>       | -0.27 | 1.65E-01 | -0.12 | 5.52E-01 |
| <b>NUDT21</b>        | 0.03  | 8.91E-01 | -0.12 | 5.52E-01 |
| <b>RAVER2</b>        | -0.14 | 4.76E-01 | -0.12 | 5.52E-01 |
| <b>RP11-522L3.5</b>  | -0.11 | 5.86E-01 | -0.12 | 5.52E-01 |
| <b>RPS10P16</b>      | -0.16 | 4.02E-01 | -0.12 | 5.52E-01 |
| <b>SNHG23</b>        | -0.06 | 7.53E-01 | -0.12 | 5.52E-01 |
| <b>WDR44</b>         | 0.06  | 7.46E-01 | -0.12 | 5.52E-01 |
| <b>ZNF684</b>        | -0.18 | 3.69E-01 | -0.12 | 5.52E-01 |
| <b>AL591025.1</b>    | 0.14  | 4.70E-01 | 0.12  | 5.52E-01 |
| <b>BZW1P2</b>        | 0.11  | 5.86E-01 | 0.12  | 5.52E-01 |
| <b>CTD-2382E5.2</b>  | 0.19  | 3.29E-01 | 0.12  | 5.52E-01 |
| <b>FAR1-IT1</b>      | 0.09  | 6.35E-01 | 0.12  | 5.52E-01 |
| <b>HMCES</b>         | -0.21 | 2.81E-01 | 0.12  | 5.52E-01 |
| <b>KCNK13</b>        | 0.36  | 5.90E-02 | 0.12  | 5.52E-01 |
| <b>LRRC41</b>        | 0.28  | 1.47E-01 | 0.12  | 5.52E-01 |
| <b>LSM12</b>         | 0.24  | 2.13E-01 | 0.12  | 5.52E-01 |
| <b>PHF5CP</b>        | 0.06  | 7.68E-01 | 0.12  | 5.52E-01 |
| <b>RCN1P2</b>        | 0.08  | 7.02E-01 | 0.12  | 5.52E-01 |
| <b>RP11-627K11.6</b> | 0.02  | 9.12E-01 | 0.12  | 5.52E-01 |
| <b>RPS2P46</b>       | -0.18 | 3.62E-01 | 0.12  | 5.52E-01 |
| <b>SPDYE17</b>       | -0.02 | 9.22E-01 | 0.12  | 5.52E-01 |
| <b>STRA13</b>        | -0.04 | 8.51E-01 | 0.12  | 5.52E-01 |
| <b>TMCO6</b>         | 0.12  | 5.32E-01 | 0.12  | 5.52E-01 |
| <b>UQCC3</b>         | 0.25  | 1.91E-01 | 0.12  | 5.52E-01 |
| <b>USP46-AS1</b>     | 0.20  | 3.15E-01 | 0.12  | 5.52E-01 |
| <b>CTB-131B5.5</b>   | -0.15 | 4.47E-01 | -0.12 | 5.53E-01 |



|                      |       |          |       |          |
|----------------------|-------|----------|-------|----------|
| <b>CTD-3105H18.8</b> | -0.09 | 6.62E-01 | -0.12 | 5.53E-01 |
| <b>DDX46</b>         | -0.12 | 5.29E-01 | -0.12 | 5.53E-01 |
| <b>MBTD1</b>         | -0.12 | 5.29E-01 | -0.12 | 5.53E-01 |
| <b>MIR106B</b>       | -0.16 | 4.14E-01 | -0.12 | 5.53E-01 |
| <b>PRR22</b>         | -0.22 | 2.52E-01 | -0.12 | 5.53E-01 |
| <b>RN7SL517P</b>     | -0.03 | 8.62E-01 | -0.12 | 5.53E-01 |
| <b>RP11-179B2.2</b>  | 0.16  | 4.11E-01 | -0.12 | 5.53E-01 |
| <b>RP11-295P9.2</b>  | -0.21 | 2.85E-01 | -0.12 | 5.53E-01 |
| <b>RP3-329A5.8</b>   | -0.39 | 4.10E-02 | -0.12 | 5.53E-01 |
| <b>TAS2R19</b>       | 0.18  | 3.49E-01 | -0.12 | 5.53E-01 |
| <b>AANAT</b>         | 0.11  | 5.71E-01 | 0.12  | 5.53E-01 |
| <b>ALG1</b>          | 0.16  | 4.03E-01 | 0.12  | 5.53E-01 |
| <b>C16orf96</b>      | 0.11  | 5.67E-01 | 0.12  | 5.53E-01 |
| <b>CAHM</b>          | 0.48  | 1.03E-02 | 0.12  | 5.53E-01 |
| <b>CTD-3032H12.2</b> | 0.10  | 6.31E-01 | 0.12  | 5.53E-01 |
| <b>DARS2</b>         | 0.10  | 6.28E-01 | 0.12  | 5.53E-01 |
| <b>DDX60</b>         | 0.30  | 1.23E-01 | 0.12  | 5.53E-01 |
| <b>GAS6-AS1</b>      | 0.17  | 3.77E-01 | 0.12  | 5.53E-01 |
| <b>IGHV3-7</b>       | 0.28  | 1.51E-01 | 0.12  | 5.53E-01 |
| <b>RP11-410L14.2</b> | -0.04 | 8.40E-01 | 0.12  | 5.53E-01 |
| <b>RP11-417O11.5</b> | -0.07 | 7.12E-01 | 0.12  | 5.53E-01 |
| <b>RP13-33H18.1</b>  | -0.25 | 2.02E-01 | 0.12  | 5.53E-01 |
| <b>RPL37</b>         | 0.11  | 5.85E-01 | 0.12  | 5.53E-01 |
| <b>SCAMP2</b>        | 0.06  | 7.73E-01 | 0.12  | 5.53E-01 |
| <b>SNORA65</b>       | -0.10 | 6.12E-01 | 0.12  | 5.53E-01 |
| <b>SNX7</b>          | 0.18  | 3.53E-01 | 0.12  | 5.53E-01 |
| <b>SPRR2C</b>        | 0.16  | 4.08E-01 | 0.12  | 5.53E-01 |
| <b>AC008937.2</b>    | -0.06 | 7.49E-01 | -0.12 | 5.54E-01 |
| <b>AC079610.2</b>    | -0.21 | 2.82E-01 | -0.12 | 5.54E-01 |
| <b>AGAP11</b>        | -0.43 | 2.25E-02 | -0.12 | 5.54E-01 |
| <b>ALMS1</b>         | -0.36 | 6.37E-02 | -0.12 | 5.54E-01 |
| <b>AP001877.1</b>    | -0.04 | 8.53E-01 | -0.12 | 5.54E-01 |
| <b>CTC-453G23.7</b>  | -0.20 | 3.09E-01 | -0.12 | 5.54E-01 |
| <b>DBNDD1</b>        | 0.02  | 9.21E-01 | 0.12  | 5.54E-01 |
| <b>FCRL5</b>         | 0.34  | 7.34E-02 | -0.12 | 5.54E-01 |
| <b>GAPDHP58</b>      | -0.02 | 9.23E-01 | 0.12  | 5.54E-01 |
| <b>HAX1</b>          | 0.03  | 8.62E-01 | -0.12 | 5.54E-01 |
| <b>HDAC10</b>        | -0.16 | 4.08E-01 | 0.12  | 5.54E-01 |
| <b>HSPE1P27</b>      | -0.07 | 7.30E-01 | -0.12 | 5.54E-01 |
| <b>IDI2-AS1</b>      | 0.06  | 7.75E-01 | -0.12 | 5.54E-01 |
| <b>MYLK-AS1</b>      | 0.17  | 3.84E-01 | 0.12  | 5.54E-01 |
| <b>NTMT1</b>         | 0.12  | 5.27E-01 | 0.12  | 5.54E-01 |
| <b>NUGGC</b>         | 0.04  | 8.49E-01 | 0.12  | 5.54E-01 |
| <b>OBSL1</b>         | -0.06 | 7.78E-01 | 0.12  | 5.54E-01 |
| <b>PSMC1P7</b>       | 0.09  | 6.36E-01 | -0.12 | 5.54E-01 |
| <b>RAB11FIP3</b>     | -0.07 | 7.27E-01 | -0.12 | 5.54E-01 |
| <b>RNU6-1289P</b>    | -0.05 | 8.04E-01 | 0.12  | 5.54E-01 |

|               |       |          |       |          |
|---------------|-------|----------|-------|----------|
| RP11-154B12.3 | -0.38 | 4.62E-02 | -0.12 | 5.54E-01 |
| RP11-186B7.4  | -0.02 | 9.17E-01 | 0.12  | 5.54E-01 |
| RP11-321F8.4  | 0.20  | 3.02E-01 | -0.12 | 5.54E-01 |
| RP11-408P14.1 | 0.01  | 9.53E-01 | 0.12  | 5.54E-01 |
| RP11-497H16.8 | -0.23 | 2.41E-01 | -0.12 | 5.54E-01 |
| RP11-537A6.9  | 0.21  | 2.88E-01 | -0.12 | 5.54E-01 |
| RP11-65L3.3   | 0.26  | 1.84E-01 | -0.12 | 5.54E-01 |
| RP11-802E16.3 | -0.19 | 3.28E-01 | 0.12  | 5.54E-01 |
| RP11-93B14.9  | -0.17 | 3.73E-01 | 0.12  | 5.54E-01 |
| RP11-968A15.2 | -0.03 | 8.66E-01 | -0.12 | 5.54E-01 |
| RP13-279N23.2 | -0.38 | 4.59E-02 | -0.12 | 5.54E-01 |
| SNORD19B      | -0.15 | 4.58E-01 | 0.12  | 5.54E-01 |
| SORT1         | 0.11  | 5.93E-01 | 0.12  | 5.54E-01 |
| USP48         | -0.19 | 3.33E-01 | 0.12  | 5.54E-01 |
| WARS2-IT1     | -0.14 | 4.85E-01 | -0.12 | 5.54E-01 |
| ZNF16         | -0.11 | 5.92E-01 | 0.12  | 5.54E-01 |
| ZNF883        | 0.14  | 4.80E-01 | 0.12  | 5.54E-01 |
| AC002059.10   | 0.03  | 8.67E-01 | 0.12  | 5.55E-01 |
| AKAP17BP      | 0.07  | 7.38E-01 | 0.12  | 5.55E-01 |
| AL596220.1    | 0.18  | 3.63E-01 | 0.12  | 5.55E-01 |
| CCL19         | -0.26 | 1.81E-01 | 0.12  | 5.55E-01 |
| CD302         | 0.07  | 7.28E-01 | -0.12 | 5.55E-01 |
| CFLAR         | 0.10  | 6.29E-01 | 0.12  | 5.55E-01 |
| CGNL1         | -0.38 | 4.54E-02 | -0.12 | 5.55E-01 |
| CSRP1         | 0.16  | 4.28E-01 | 0.12  | 5.55E-01 |
| CTD-3022L24.1 | -0.09 | 6.65E-01 | -0.12 | 5.55E-01 |
| DNHD1         | -0.04 | 8.51E-01 | -0.12 | 5.55E-01 |
| ENTPD7        | 0.12  | 5.54E-01 | 0.12  | 5.55E-01 |
| GNPNAT1       | 0.18  | 3.52E-01 | -0.12 | 5.55E-01 |
| GS1-44D20.1   | 0.17  | 4.00E-01 | 0.12  | 5.55E-01 |
| LINC00954     | 0.02  | 9.29E-01 | -0.12 | 5.55E-01 |
| LINC01153     | -0.07 | 7.13E-01 | -0.12 | 5.55E-01 |
| LINC01160     | 0.02  | 9.09E-01 | 0.12  | 5.55E-01 |
| LINC01402     | -0.09 | 6.60E-01 | 0.12  | 5.55E-01 |
| LYG2          | -0.18 | 3.61E-01 | -0.12 | 5.55E-01 |
| MSL3          | 0.02  | 9.06E-01 | 0.12  | 5.55E-01 |
| NUS1          | 0.14  | 4.70E-01 | -0.12 | 5.55E-01 |
| PLCXD2-AS1    | 0.03  | 8.97E-01 | 0.12  | 5.55E-01 |
| PNMA6A        | -0.20 | 3.11E-01 | -0.12 | 5.55E-01 |
| RN7SKP184     | -0.33 | 8.62E-02 | -0.12 | 5.55E-01 |
| RNU7-113P     | 0.40  | 3.47E-02 | -0.12 | 5.55E-01 |
| RP11-295D4.1  | 0.06  | 7.62E-01 | -0.12 | 5.55E-01 |
| RP11-323C15.2 | 0.03  | 8.75E-01 | 0.12  | 5.55E-01 |
| RP11-422P24.9 | -0.16 | 4.26E-01 | 0.12  | 5.55E-01 |
| RP11-717A5.1  | -0.06 | 7.44E-01 | -0.12 | 5.55E-01 |
| RP11-91J19.2  | -0.39 | 4.07E-02 | -0.12 | 5.55E-01 |
| TXNL4A        | 0.06  | 7.75E-01 | -0.12 | 5.55E-01 |

|                |       |          |       |          |
|----------------|-------|----------|-------|----------|
| TYW1           | 0.13  | 5.01E-01 | 0.12  | 5.55E-01 |
| AC109631.1     | -0.06 | 7.62E-01 | -0.12 | 5.56E-01 |
| C19orf71       | -0.05 | 8.11E-01 | -0.12 | 5.56E-01 |
| COX17          | 0.14  | 4.63E-01 | -0.12 | 5.56E-01 |
| CSPG4P9        | -0.05 | 7.95E-01 | 0.12  | 5.56E-01 |
| CTBP1-AS       | -0.06 | 7.51E-01 | -0.12 | 5.56E-01 |
| CYP39A1        | -0.04 | 8.24E-01 | 0.12  | 5.56E-01 |
| G480           | 0.18  | 3.61E-01 | 0.12  | 5.56E-01 |
| HIPK1          | 0.03  | 8.74E-01 | -0.12 | 5.56E-01 |
| KCNN1          | 0.06  | 7.64E-01 | 0.12  | 5.56E-01 |
| LRRC37A4P      | 0.22  | 2.53E-01 | -0.12 | 5.56E-01 |
| MAP1A          | -0.29 | 1.32E-01 | -0.12 | 5.56E-01 |
| NHLRC3         | 0.17  | 3.76E-01 | -0.12 | 5.56E-01 |
| NUDT17         | -0.09 | 6.46E-01 | 0.12  | 5.56E-01 |
| RN7SKP253      | 0.03  | 8.67E-01 | 0.12  | 5.56E-01 |
| RNASE2         | 0.00  | 9.88E-01 | -0.12 | 5.56E-01 |
| RP1-111B22.3   | 0.11  | 5.90E-01 | 0.12  | 5.56E-01 |
| RP11-15B17.1   | -0.20 | 3.02E-01 | -0.12 | 5.56E-01 |
| RP11-19G24.1   | -0.04 | 8.42E-01 | 0.12  | 5.56E-01 |
| RP11-235P11.1  | -0.36 | 5.72E-02 | -0.12 | 5.56E-01 |
| RP11-414H17.5  | -0.13 | 5.18E-01 | -0.12 | 5.56E-01 |
| RP11-4C20.4    | -0.14 | 4.93E-01 | 0.12  | 5.56E-01 |
| RP11-576C12.1  | -0.03 | 8.68E-01 | -0.12 | 5.56E-01 |
| RP4-700A9.1    | -0.14 | 4.91E-01 | -0.12 | 5.56E-01 |
| SCARF2         | -0.13 | 4.98E-01 | 0.12  | 5.56E-01 |
| 9-Sep          | 0.05  | 8.16E-01 | 0.12  | 5.56E-01 |
| SNAP29         | 0.18  | 3.60E-01 | 0.12  | 5.56E-01 |
| STX16          | -0.09 | 6.55E-01 | 0.12  | 5.56E-01 |
| TNFSF11        | -0.26 | 1.77E-01 | 0.12  | 5.56E-01 |
| TRIP13         | -0.01 | 9.59E-01 | -0.12 | 5.56E-01 |
| XLOC_001804    | -0.12 | 5.46E-01 | -0.12 | 5.56E-01 |
| ZNF865         | -0.11 | 5.78E-01 | 0.12  | 5.56E-01 |
| ABCB7          | -0.17 | 4.00E-01 | -0.12 | 5.57E-01 |
| AC003956.1     | -0.29 | 1.40E-01 | 0.12  | 5.57E-01 |
| AC004980.9     | 0.22  | 2.68E-01 | -0.12 | 5.57E-01 |
| AC034243.1     | -0.38 | 4.46E-02 | -0.12 | 5.57E-01 |
| AC133528.2     | 0.27  | 1.66E-01 | 0.12  | 5.57E-01 |
| CDK11A         | -0.34 | 7.29E-02 | -0.12 | 5.57E-01 |
| CEP290         | -0.22 | 2.65E-01 | -0.12 | 5.57E-01 |
| CTB-113P19.1   | -0.10 | 6.15E-01 | -0.12 | 5.57E-01 |
| CTD-2319112.10 | 0.18  | 3.71E-01 | 0.12  | 5.57E-01 |
| EEF1A1P19      | -0.29 | 1.38E-01 | -0.12 | 5.57E-01 |
| G38630         | 0.04  | 8.32E-01 | -0.12 | 5.57E-01 |
| G7957          | 0.01  | 9.78E-01 | -0.12 | 5.57E-01 |
| MRPL50P2       | 0.11  | 5.84E-01 | -0.12 | 5.57E-01 |
| NOG            | 0.31  | 1.08E-01 | 0.12  | 5.57E-01 |
| PRRC2C         | -0.01 | 9.74E-01 | 0.12  | 5.57E-01 |

|                      |       |          |       |          |
|----------------------|-------|----------|-------|----------|
| <b>RN7SL76P</b>      | -0.08 | 6.99E-01 | 0.12  | 5.57E-01 |
| <b>RP11-16E12.1</b>  | -0.02 | 9.11E-01 | 0.12  | 5.57E-01 |
| <b>RP11-197P3.5</b>  | -0.12 | 5.51E-01 | -0.12 | 5.57E-01 |
| <b>RP11-226L15.1</b> | 0.00  | 9.91E-01 | -0.12 | 5.57E-01 |
| <b>RP11-254I22.2</b> | -0.06 | 7.50E-01 | 0.12  | 5.57E-01 |
| <b>TAOK3</b>         | -0.19 | 3.40E-01 | 0.12  | 5.57E-01 |
| <b>TBK1</b>          | 0.13  | 5.22E-01 | -0.12 | 5.57E-01 |
| <b>TP53BP1</b>       | -0.12 | 5.35E-01 | 0.12  | 5.57E-01 |
| <b>TRIM23</b>        | 0.28  | 1.56E-01 | 0.12  | 5.57E-01 |
| <b>XLOC_008000</b>   | -0.14 | 4.74E-01 | 0.12  | 5.57E-01 |
| <b>XLOC_013952</b>   | -0.17 | 3.96E-01 | -0.12 | 5.57E-01 |
| <b>ZNF500</b>        | 0.21  | 2.72E-01 | 0.12  | 5.57E-01 |
| <b>ZNF608</b>        | -0.25 | 2.07E-01 | 0.12  | 5.57E-01 |
| <b>ANKS1B</b>        | -0.07 | 7.36E-01 | 0.12  | 5.58E-01 |
| <b>BTF3P12</b>       | 0.00  | 9.87E-01 | -0.12 | 5.58E-01 |
| <b>C20orf197</b>     | -0.14 | 4.70E-01 | -0.12 | 5.58E-01 |
| <b>CCL5</b>          | 0.24  | 2.13E-01 | 0.12  | 5.58E-01 |
| <b>CSTF1</b>         | 0.28  | 1.48E-01 | 0.12  | 5.58E-01 |
| <b>CTC-379B2.4</b>   | -0.09 | 6.42E-01 | -0.12 | 5.58E-01 |
| <b>CTD-2024I7.1</b>  | -0.11 | 5.77E-01 | -0.12 | 5.58E-01 |
| <b>DCXR</b>          | 0.14  | 4.75E-01 | 0.12  | 5.58E-01 |
| <b>ETF1</b>          | 0.17  | 3.76E-01 | -0.12 | 5.58E-01 |
| <b>GDAP1</b>         | 0.22  | 2.58E-01 | -0.12 | 5.58E-01 |
| <b>IL1R1</b>         | 0.31  | 1.10E-01 | 0.12  | 5.58E-01 |
| <b>MFSD5</b>         | -0.16 | 4.28E-01 | -0.12 | 5.58E-01 |
| <b>MYCBP2-AS1</b>    | -0.11 | 5.93E-01 | -0.12 | 5.58E-01 |
| <b>PRB2</b>          | -0.08 | 6.89E-01 | 0.12  | 5.58E-01 |
| <b>PRR12</b>         | -0.07 | 7.12E-01 | 0.12  | 5.58E-01 |
| <b>PTDSS1</b>        | -0.04 | 8.59E-01 | -0.12 | 5.58E-01 |
| <b>PTPMT1</b>        | 0.28  | 1.49E-01 | 0.12  | 5.58E-01 |
| <b>RNU6ATAC18P</b>   | -0.28 | 1.51E-01 | 0.12  | 5.58E-01 |
| <b>RORB</b>          | -0.16 | 4.24E-01 | -0.12 | 5.58E-01 |
| <b>RP11-435O5.2</b>  | -0.17 | 3.93E-01 | 0.12  | 5.58E-01 |
| <b>RP11-461A8.4</b>  | 0.27  | 1.62E-01 | -0.12 | 5.58E-01 |
| <b>RP11-542K23.9</b> | -0.07 | 7.33E-01 | 0.12  | 5.58E-01 |
| <b>RP11-583F2.1</b>  | -0.14 | 4.90E-01 | -0.12 | 5.58E-01 |
| <b>SH3PXD2B</b>      | -0.08 | 6.81E-01 | 0.12  | 5.58E-01 |
| <b>SIRT7</b>         | -0.20 | 3.07E-01 | 0.12  | 5.58E-01 |
| <b>SNORD19</b>       | -0.13 | 4.98E-01 | -0.12 | 5.58E-01 |
| <b>SNX14</b>         | -0.06 | 7.67E-01 | -0.12 | 5.58E-01 |
| <b>TMEM248</b>       | 0.21  | 2.76E-01 | -0.12 | 5.58E-01 |
| <b>UQCR10</b>        | 0.13  | 5.09E-01 | 0.12  | 5.58E-01 |
| <b>AC009480.1</b>    | 0.14  | 4.62E-01 | -0.12 | 5.59E-01 |
| <b>C18orf8</b>       | 0.05  | 7.97E-01 | -0.12 | 5.59E-01 |
| <b>CCDC170</b>       | 0.12  | 5.39E-01 | -0.12 | 5.59E-01 |
| <b>CTD-2006C1.12</b> | 0.11  | 5.60E-01 | -0.12 | 5.59E-01 |
| <b>G26812</b>        | 0.08  | 6.72E-01 | -0.12 | 5.59E-01 |

|                |       |          |       |          |
|----------------|-------|----------|-------|----------|
| LAPTM4B        | 0.13  | 5.21E-01 | -0.12 | 5.59E-01 |
| LIFR-AS1       | -0.19 | 3.28E-01 | -0.12 | 5.59E-01 |
| LRRN3          | -0.21 | 2.81E-01 | -0.12 | 5.59E-01 |
| PABPC4         | 0.08  | 6.84E-01 | -0.12 | 5.59E-01 |
| PCBP1-AS1      | -0.24 | 2.10E-01 | -0.12 | 5.59E-01 |
| PDS5B          | -0.08 | 7.01E-01 | -0.12 | 5.59E-01 |
| PGM2L1         | -0.23 | 2.31E-01 | -0.12 | 5.59E-01 |
| PRICKLE2-AS2   | -0.05 | 7.87E-01 | -0.12 | 5.59E-01 |
| PRSS51         | -0.15 | 4.37E-01 | -0.12 | 5.59E-01 |
| RNU6-307P      | 0.19  | 3.25E-01 | -0.12 | 5.59E-01 |
| RP11-1102P22.1 | 0.17  | 3.89E-01 | -0.12 | 5.59E-01 |
| RP11-180P8.3   | 0.12  | 5.29E-01 | -0.12 | 5.59E-01 |
| RP11-55J15.2   | -0.31 | 1.08E-01 | -0.12 | 5.59E-01 |
| RP11-676J12.9  | 0.12  | 5.43E-01 | -0.12 | 5.59E-01 |
| RP11-849F2.9   | 0.50  | 6.65E-03 | -0.12 | 5.59E-01 |
| USP6NL         | 0.14  | 4.81E-01 | -0.12 | 5.59E-01 |
| XLOC_007801    | 0.13  | 5.04E-01 | -0.12 | 5.59E-01 |
| XLOC_010266    | -0.14 | 4.82E-01 | -0.12 | 5.59E-01 |
| ZBTB38         | -0.11 | 5.75E-01 | -0.12 | 5.59E-01 |
| CEP170B        | 0.14  | 4.74E-01 | 0.12  | 5.59E-01 |
| CLDN5          | -0.26 | 1.80E-01 | 0.12  | 5.59E-01 |
| DCLRE1A        | 0.16  | 4.12E-01 | 0.12  | 5.59E-01 |
| DDT            | -0.19 | 3.34E-01 | 0.12  | 5.59E-01 |
| LAMP2          | 0.09  | 6.58E-01 | 0.12  | 5.59E-01 |
| MFSD9          | 0.30  | 1.17E-01 | 0.12  | 5.59E-01 |
| NCLN           | 0.22  | 2.59E-01 | 0.12  | 5.59E-01 |
| RP11-285C1.2   | 0.21  | 2.93E-01 | 0.12  | 5.59E-01 |
| RP11-4O1.2     | 0.31  | 1.14E-01 | 0.12  | 5.59E-01 |
| ABCA9-AS1      | 0.24  | 2.19E-01 | -0.12 | 5.60E-01 |
| AC012314.19    | -0.33 | 8.16E-02 | -0.12 | 5.60E-01 |
| AC013448.2     | 0.05  | 8.18E-01 | -0.12 | 5.60E-01 |
| ATP5J          | 0.08  | 6.88E-01 | 0.12  | 5.60E-01 |
| AXL            | -0.15 | 4.54E-01 | 0.12  | 5.60E-01 |
| BAIAP2         | 0.01  | 9.50E-01 | 0.12  | 5.60E-01 |
| CBX3P5         | -0.18 | 3.54E-01 | -0.12 | 5.60E-01 |
| CTD-2248H3.1   | -0.06 | 7.80E-01 | -0.12 | 5.60E-01 |
| EIF2B5         | 0.13  | 5.08E-01 | 0.12  | 5.60E-01 |
| FOSL1P1        | 0.10  | 6.22E-01 | 0.12  | 5.60E-01 |
| HIST1H1E       | -0.11 | 5.73E-01 | -0.12 | 5.60E-01 |
| HIST2H4A       | -0.10 | 5.97E-01 | 0.12  | 5.60E-01 |
| HSPB1          | 0.06  | 7.68E-01 | 0.12  | 5.60E-01 |
| KRT31          | -0.34 | 7.49E-02 | -0.12 | 5.60E-01 |
| LOC100421166   | -0.11 | 5.80E-01 | 0.12  | 5.60E-01 |
| NBL1           | -0.27 | 1.61E-01 | 0.12  | 5.60E-01 |
| PCDHGB8P       | -0.18 | 3.69E-01 | -0.12 | 5.60E-01 |
| PDE4C          | 0.09  | 6.49E-01 | -0.12 | 5.60E-01 |
| RFWD2          | -0.09 | 6.55E-01 | -0.12 | 5.60E-01 |

|                      |       |          |       |          |
|----------------------|-------|----------|-------|----------|
| <b>RN7SL180P</b>     | -0.18 | 3.70E-01 | 0.12  | 5.60E-01 |
| <b>RP11-224O19.4</b> | 0.06  | 7.48E-01 | -0.12 | 5.60E-01 |
| <b>RP11-230C9.2</b>  | -0.18 | 3.57E-01 | -0.12 | 5.60E-01 |
| <b>RP11-314C16.1</b> | -0.12 | 5.50E-01 | -0.12 | 5.60E-01 |
| <b>RP11-397E7.4</b>  | -0.18 | 3.71E-01 | 0.12  | 5.60E-01 |
| <b>RP11-432B6.1</b>  | -0.03 | 8.74E-01 | -0.12 | 5.60E-01 |
| <b>RP11-549J18.1</b> | -0.39 | 3.80E-02 | -0.12 | 5.60E-01 |
| <b>RP11-66D17.3</b>  | 0.19  | 3.35E-01 | 0.12  | 5.60E-01 |
| <b>RP4-665J23.1</b>  | -0.20 | 3.07E-01 | -0.12 | 5.60E-01 |
| <b>SP2-AS1</b>       | -0.14 | 4.78E-01 | -0.12 | 5.60E-01 |
| <b>SPTSSB</b>        | 0.03  | 8.82E-01 | 0.12  | 5.60E-01 |
| <b>ZNF780B</b>       | 0.09  | 6.61E-01 | 0.12  | 5.60E-01 |
| <b>AC093267.1</b>    | -0.16 | 4.04E-01 | -0.12 | 5.61E-01 |
| <b>CCDC134</b>       | 0.06  | 7.76E-01 | 0.12  | 5.61E-01 |
| <b>COL18A1-AS2</b>   | -0.27 | 1.57E-01 | -0.12 | 5.61E-01 |
| <b>CTD-2135D7.2</b>  | -0.16 | 4.13E-01 | -0.12 | 5.61E-01 |
| <b>FRK</b>           | 0.40  | 3.40E-02 | 0.12  | 5.61E-01 |
| <b>G21034</b>        | -0.13 | 5.19E-01 | -0.12 | 5.61E-01 |
| <b>GALNT1</b>        | 0.25  | 1.93E-01 | 0.12  | 5.61E-01 |
| <b>GRID2IP</b>       | -0.10 | 6.07E-01 | -0.12 | 5.61E-01 |
| <b>GRM1</b>          | -0.03 | 8.87E-01 | -0.12 | 5.61E-01 |
| <b>KIF3C</b>         | -0.01 | 9.77E-01 | -0.12 | 5.61E-01 |
| <b>KLHDC4</b>        | -0.02 | 9.15E-01 | -0.12 | 5.61E-01 |
| <b>KRTAP3-2</b>      | -0.13 | 5.19E-01 | 0.12  | 5.61E-01 |
| <b>L3MBTL2</b>       | 0.33  | 8.62E-02 | -0.12 | 5.61E-01 |
| <b>NPM1P29</b>       | 0.27  | 1.69E-01 | -0.12 | 5.61E-01 |
| <b>PGM1</b>          | 0.25  | 2.08E-01 | 0.12  | 5.61E-01 |
| <b>PI3</b>           | 0.34  | 7.59E-02 | 0.12  | 5.61E-01 |
| <b>PRC1-AS1</b>      | -0.32 | 9.24E-02 | -0.12 | 5.61E-01 |
| <b>RN7SL674P</b>     | -0.13 | 5.16E-01 | 0.12  | 5.61E-01 |
| <b>RP11-212D19.5</b> | -0.10 | 6.03E-01 | 0.12  | 5.61E-01 |
| <b>RP11-344N10.5</b> | -0.33 | 9.09E-02 | -0.12 | 5.61E-01 |
| <b>RP11-39M21.2</b>  | -0.29 | 1.34E-01 | -0.12 | 5.61E-01 |
| <b>RP11-54I5.1</b>   | -0.11 | 5.68E-01 | -0.12 | 5.61E-01 |
| <b>RP11-573G6.4</b>  | 0.24  | 2.27E-01 | 0.12  | 5.61E-01 |
| <b>RP11-864J10.2</b> | -0.19 | 3.45E-01 | 0.12  | 5.61E-01 |
| <b>RP11-96K19.5</b>  | -0.03 | 8.73E-01 | -0.12 | 5.61E-01 |
| <b>RP13-228J13.8</b> | 0.07  | 7.12E-01 | 0.12  | 5.61E-01 |
| <b>RP5-1100E15.4</b> | -0.08 | 6.83E-01 | 0.12  | 5.61E-01 |
| <b>RPLPOP6</b>       | 0.21  | 2.93E-01 | 0.12  | 5.61E-01 |
| <b>SIAH1</b>         | 0.04  | 8.55E-01 | 0.12  | 5.61E-01 |
| <b>SPIB</b>          | 0.23  | 2.29E-01 | -0.12 | 5.61E-01 |
| <b>ST13</b>          | -0.04 | 8.41E-01 | -0.12 | 5.61E-01 |
| <b>STARD8</b>        | -0.02 | 9.31E-01 | 0.12  | 5.61E-01 |
| <b>TACC3</b>         | 0.05  | 8.18E-01 | 0.12  | 5.61E-01 |
| <b>TRGV3</b>         | 0.26  | 1.90E-01 | 0.12  | 5.61E-01 |
| <b>ZBTB2</b>         | 0.00  | 9.81E-01 | -0.12 | 5.61E-01 |

|                 |       |          |       |          |
|-----------------|-------|----------|-------|----------|
| ZNF22           | -0.10 | 6.07E-01 | -0.12 | 5.61E-01 |
| CDK5RAP2        | 0.11  | 5.74E-01 | 0.12  | 5.62E-01 |
| CLCN3P1         | -0.27 | 1.67E-01 | 0.12  | 5.62E-01 |
| CRLS1           | 0.00  | 1.00E+00 | -0.12 | 5.62E-01 |
| CTNNBIP1        | 0.03  | 8.78E-01 | 0.12  | 5.62E-01 |
| DHX37           | 0.12  | 5.44E-01 | 0.12  | 5.62E-01 |
| EFNA4           | 0.01  | 9.67E-01 | -0.12 | 5.62E-01 |
| EP300           | -0.06 | 7.47E-01 | 0.12  | 5.62E-01 |
| FAM50A          | -0.03 | 8.63E-01 | 0.12  | 5.62E-01 |
| FBXL14          | 0.00  | 1.00E+00 | -0.12 | 5.62E-01 |
| HECA            | 0.08  | 6.93E-01 | 0.12  | 5.62E-01 |
| HSD17B12        | 0.33  | 8.56E-02 | -0.12 | 5.62E-01 |
| IDSP1           | -0.17 | 3.91E-01 | -0.12 | 5.62E-01 |
| LGI2            | -0.05 | 8.17E-01 | 0.12  | 5.62E-01 |
| LINC00958       | 0.00  | 9.83E-01 | 0.12  | 5.62E-01 |
| LINC01480       | -0.33 | 8.32E-02 | -0.12 | 5.62E-01 |
| PARG            | 0.02  | 9.00E-01 | -0.12 | 5.62E-01 |
| PKNOX1          | 0.04  | 8.43E-01 | 0.12  | 5.62E-01 |
| RNU6-1153P      | -0.35 | 6.96E-02 | -0.12 | 5.62E-01 |
| RP11-106E7.1    | 0.01  | 9.50E-01 | -0.12 | 5.62E-01 |
| RP11-1078H9.5   | 0.05  | 8.11E-01 | 0.12  | 5.62E-01 |
| RP11-166P13.3   | -0.24 | 2.26E-01 | -0.12 | 5.62E-01 |
| RP11-422P24.11  | -0.34 | 7.64E-02 | -0.12 | 5.62E-01 |
| RP11-545M17.2   | -0.05 | 7.99E-01 | -0.12 | 5.62E-01 |
| RP11-635L1.3    | -0.01 | 9.54E-01 | -0.12 | 5.62E-01 |
| RP11-90B9.3     | 0.16  | 4.08E-01 | -0.12 | 5.62E-01 |
| RP3-391O22.1    | -0.13 | 4.99E-01 | 0.12  | 5.62E-01 |
| SH3RF3          | 0.47  | 1.20E-02 | 0.12  | 5.62E-01 |
| SPPL2A          | 0.31  | 1.06E-01 | 0.12  | 5.62E-01 |
| STAM2           | 0.23  | 2.41E-01 | 0.12  | 5.62E-01 |
| TMEM171         | 0.32  | 9.18E-02 | -0.12 | 5.62E-01 |
| TOR2A           | -0.09 | 6.32E-01 | -0.12 | 5.62E-01 |
| TRAPPC2P1       | 0.32  | 1.02E-01 | 0.12  | 5.62E-01 |
| TSEN15P2        | 0.07  | 7.41E-01 | 0.12  | 5.62E-01 |
| TTC30B          | 0.10  | 6.29E-01 | 0.12  | 5.62E-01 |
| XXbac-B461K10.4 | -0.42 | 2.56E-02 | -0.12 | 5.62E-01 |
| ZNF137P         | 0.10  | 6.31E-01 | -0.12 | 5.62E-01 |
| AC008753.6      | -0.28 | 1.51E-01 | 0.12  | 5.63E-01 |
| AK5             | 0.03  | 8.66E-01 | 0.12  | 5.63E-01 |
| ALKBH2          | 0.08  | 6.87E-01 | -0.12 | 5.63E-01 |
| ANKS4B          | -0.28 | 1.46E-01 | -0.12 | 5.63E-01 |
| CBR1            | 0.22  | 2.55E-01 | 0.12  | 5.63E-01 |
| CHD6            | -0.18 | 3.50E-01 | 0.12  | 5.63E-01 |
| CSNK1G3         | 0.16  | 4.16E-01 | 0.12  | 5.63E-01 |
| EXTL3           | 0.26  | 1.83E-01 | 0.12  | 5.63E-01 |
| HELZ            | -0.06 | 7.66E-01 | 0.12  | 5.63E-01 |
| HMGCR           | 0.14  | 4.92E-01 | 0.12  | 5.63E-01 |

|               |       |          |       |          |
|---------------|-------|----------|-------|----------|
| HSPD1P6       | -0.18 | 3.58E-01 | -0.12 | 5.63E-01 |
| KMT2B         | -0.04 | 8.35E-01 | 0.12  | 5.63E-01 |
| LMO3          | 0.04  | 8.28E-01 | -0.12 | 5.63E-01 |
| MANF          | 0.11  | 5.69E-01 | 0.12  | 5.63E-01 |
| NOL9          | 0.09  | 6.60E-01 | 0.12  | 5.63E-01 |
| PTPRZ1        | -0.07 | 7.17E-01 | -0.12 | 5.63E-01 |
| PYROXD2       | -0.18 | 3.46E-01 | -0.12 | 5.63E-01 |
| RABL3         | 0.28  | 1.43E-01 | -0.12 | 5.63E-01 |
| RN7SKP115     | 0.04  | 8.21E-01 | -0.12 | 5.63E-01 |
| RP11-121M22.1 | -0.37 | 5.38E-02 | 0.12  | 5.63E-01 |
| RP11-266J6.2  | 0.05  | 8.17E-01 | -0.12 | 5.63E-01 |
| RP11-286B14.1 | -0.21 | 2.78E-01 | 0.12  | 5.63E-01 |
| RP11-38H17.1  | -0.24 | 2.21E-01 | 0.12  | 5.63E-01 |
| RP11-392O17.1 | 0.15  | 4.34E-01 | -0.12 | 5.63E-01 |
| RP11-506O24.1 | -0.13 | 4.97E-01 | 0.12  | 5.63E-01 |
| SEPP1         | 0.12  | 5.37E-01 | -0.12 | 5.63E-01 |
| SGCD          | -0.24 | 2.11E-01 | -0.12 | 5.63E-01 |
| TTC36         | 0.09  | 6.48E-01 | 0.12  | 5.63E-01 |
| USH2A         | -0.07 | 7.41E-01 | -0.12 | 5.63E-01 |
| XLOC_014403   | 0.06  | 7.49E-01 | 0.12  | 5.63E-01 |
| ABCC9         | -0.25 | 2.07E-01 | -0.12 | 5.64E-01 |
| AC010969.1    | 0.01  | 9.42E-01 | -0.12 | 5.64E-01 |
| AC016745.1    | -0.37 | 4.94E-02 | -0.12 | 5.64E-01 |
| ADCYAP1R1     | -0.09 | 6.35E-01 | 0.12  | 5.64E-01 |
| ALG3          | 0.15  | 4.47E-01 | 0.12  | 5.64E-01 |
| CHRNB2        | 0.00  | 9.83E-01 | 0.12  | 5.64E-01 |
| CMTR2         | 0.26  | 1.75E-01 | 0.12  | 5.64E-01 |
| CTD-2047H16.5 | -0.01 | 9.71E-01 | 0.12  | 5.64E-01 |
| CTD-2349P21.3 | -0.23 | 2.49E-01 | 0.12  | 5.64E-01 |
| DCAF4         | -0.04 | 8.57E-01 | -0.12 | 5.64E-01 |
| FBXL2         | -0.09 | 6.33E-01 | -0.12 | 5.64E-01 |
| IGKV1OR2-108  | -0.05 | 8.18E-01 | -0.12 | 5.64E-01 |
| IGSF11        | -0.39 | 4.09E-02 | -0.12 | 5.64E-01 |
| IMPDH2        | 0.11  | 5.64E-01 | -0.12 | 5.64E-01 |
| IRX5          | 0.40  | 3.75E-02 | -0.12 | 5.64E-01 |
| LARP1         | 0.10  | 6.14E-01 | 0.12  | 5.64E-01 |
| LDLRAD2       | -0.10 | 6.22E-01 | -0.12 | 5.64E-01 |
| LINC01184     | 0.08  | 6.69E-01 | -0.12 | 5.64E-01 |
| MRPL27        | 0.33  | 8.73E-02 | 0.12  | 5.64E-01 |
| NMD3          | 0.08  | 7.00E-01 | 0.12  | 5.64E-01 |
| PCDHGB6       | 0.11  | 5.61E-01 | -0.12 | 5.64E-01 |
| PRTFDC1       | -0.05 | 7.84E-01 | 0.12  | 5.64E-01 |
| RN7SL141P     | 0.27  | 1.57E-01 | -0.12 | 5.64E-01 |
| RP11-298E2.2  | 0.25  | 2.05E-01 | -0.12 | 5.64E-01 |
| RP11-484K9.4  | 0.19  | 3.44E-01 | -0.12 | 5.64E-01 |
| RP11-815I9.4  | 0.31  | 1.04E-01 | 0.12  | 5.64E-01 |
| SAMD12-AS1    | -0.21 | 2.77E-01 | 0.12  | 5.64E-01 |



|                  |       |          |       |          |
|------------------|-------|----------|-------|----------|
| TMED1            | 0.31  | 1.08E-01 | 0.12  | 5.64E-01 |
| TOB1-AS1         | 0.10  | 6.22E-01 | 0.12  | 5.64E-01 |
| ABCA2            | -0.09 | 6.42E-01 | -0.12 | 5.65E-01 |
| ANLN             | 0.04  | 8.59E-01 | -0.12 | 5.65E-01 |
| AP000344.4       | 0.08  | 6.77E-01 | 0.12  | 5.65E-01 |
| ARMC2            | 0.03  | 8.77E-01 | -0.12 | 5.65E-01 |
| BBOX1-AS1        | 0.29  | 1.30E-01 | 0.12  | 5.65E-01 |
| BCL10            | 0.23  | 2.49E-01 | 0.12  | 5.65E-01 |
| CDHR5            | -0.07 | 7.09E-01 | -0.12 | 5.65E-01 |
| CTC-205M6.1      | 0.07  | 7.19E-01 | -0.12 | 5.65E-01 |
| DCTD             | 0.06  | 7.44E-01 | 0.12  | 5.65E-01 |
| EIF4G3           | -0.15 | 4.55E-01 | 0.12  | 5.65E-01 |
| ELOVL6           | 0.08  | 6.72E-01 | -0.12 | 5.65E-01 |
| G36324           | 0.17  | 3.95E-01 | 0.12  | 5.65E-01 |
| LINC00165        | -0.17 | 3.78E-01 | -0.12 | 5.65E-01 |
| LUC7L3           | -0.20 | 3.01E-01 | -0.12 | 5.65E-01 |
| MAPK1            | 0.03  | 8.94E-01 | -0.12 | 5.65E-01 |
| MEGF8            | 0.22  | 2.50E-01 | 0.12  | 5.65E-01 |
| NTRK3            | -0.05 | 7.86E-01 | 0.12  | 5.65E-01 |
| PHKB             | 0.04  | 8.49E-01 | -0.12 | 5.65E-01 |
| PSMD6-AS2        | -0.21 | 2.78E-01 | -0.12 | 5.65E-01 |
| RP11-100N21.1    | -0.15 | 4.44E-01 | -0.12 | 5.65E-01 |
| RP11-115H18.1    | 0.00  | 9.88E-01 | -0.12 | 5.65E-01 |
| RP11-275I14.4    | -0.17 | 3.89E-01 | -0.12 | 5.65E-01 |
| RP11-333E13.2    | 0.01  | 9.60E-01 | 0.12  | 5.65E-01 |
| RP11-739N20.3    | 0.18  | 3.69E-01 | -0.12 | 5.65E-01 |
| RP11-864N7.2     | 0.10  | 6.10E-01 | 0.12  | 5.65E-01 |
| RP11-96H19.1     | -0.24 | 2.24E-01 | -0.12 | 5.65E-01 |
| RP5-890O3.9      | 0.23  | 2.38E-01 | 0.12  | 5.65E-01 |
| RPL12P9          | -0.10 | 6.02E-01 | 0.12  | 5.65E-01 |
| SLC5A4           | -0.34 | 7.92E-02 | 0.12  | 5.65E-01 |
| TMEM230          | 0.24  | 2.15E-01 | -0.12 | 5.65E-01 |
| TRAJ18           | -0.13 | 4.96E-01 | -0.12 | 5.65E-01 |
| WBSCR27          | -0.10 | 6.16E-01 | -0.12 | 5.65E-01 |
| ZNF490           | -0.07 | 7.24E-01 | 0.12  | 5.65E-01 |
| C9               | -0.30 | 1.18E-01 | 0.12  | 5.66E-01 |
| CIRH1A           | 0.21  | 2.83E-01 | 0.12  | 5.66E-01 |
| DDN              | -0.04 | 8.35E-01 | 0.12  | 5.66E-01 |
| LIG4             | 0.30  | 1.15E-01 | 0.12  | 5.66E-01 |
| METTL5           | 0.01  | 9.59E-01 | 0.12  | 5.66E-01 |
| RASGRP2          | 0.35  | 6.41E-02 | 0.12  | 5.66E-01 |
| RP11-466H18.1    | -0.23 | 2.30E-01 | 0.12  | 5.66E-01 |
| SUCO             | 0.33  | 8.98E-02 | 0.12  | 5.66E-01 |
| XLOC_012436      | -0.07 | 7.41E-01 | 0.12  | 5.66E-01 |
| KXbac-B476C20.11 | -0.25 | 2.08E-01 | 0.12  | 5.66E-01 |
| AC007365.1       | -0.15 | 4.53E-01 | -0.12 | 5.66E-01 |
| AC091729.9       | -0.12 | 5.27E-01 | -0.12 | 5.66E-01 |

|                |       |          |       |          |
|----------------|-------|----------|-------|----------|
| ATL3           | -0.02 | 9.00E-01 | -0.12 | 5.66E-01 |
| ATM            | -0.19 | 3.33E-01 | -0.12 | 5.66E-01 |
| ATP1A1-AS1     | 0.10  | 5.99E-01 | -0.12 | 5.66E-01 |
| CRYBB2P1       | -0.07 | 7.14E-01 | -0.12 | 5.66E-01 |
| FAR1           | 0.13  | 5.01E-01 | -0.12 | 5.66E-01 |
| G42353         | -0.10 | 6.24E-01 | -0.12 | 5.66E-01 |
| KCNA2          | 0.10  | 6.01E-01 | -0.12 | 5.66E-01 |
| MIR155HG       | 0.19  | 3.26E-01 | -0.12 | 5.66E-01 |
| OSBPL9P4       | -0.15 | 4.60E-01 | -0.12 | 5.66E-01 |
| PHF1           | -0.10 | 6.02E-01 | -0.12 | 5.66E-01 |
| RBL1           | 0.07  | 7.05E-01 | -0.12 | 5.66E-01 |
| RP11-330M19.1  | -0.16 | 4.12E-01 | -0.12 | 5.66E-01 |
| UGT1A2P        | -0.28 | 1.51E-01 | -0.12 | 5.66E-01 |
| XRCC6P2        | 0.20  | 3.15E-01 | -0.12 | 5.66E-01 |
| ZNF584         | 0.21  | 2.93E-01 | -0.12 | 5.66E-01 |
| AC020951.1     | -0.10 | 5.99E-01 | -0.12 | 5.67E-01 |
| CACTIN-AS1     | -0.28 | 1.46E-01 | -0.12 | 5.67E-01 |
| CEP95          | -0.15 | 4.38E-01 | -0.12 | 5.67E-01 |
| MESTP1         | -0.45 | 1.61E-02 | -0.12 | 5.67E-01 |
| MIR3648        | 0.08  | 6.91E-01 | -0.12 | 5.67E-01 |
| MYLK3          | 0.18  | 3.59E-01 | -0.12 | 5.67E-01 |
| NDUFAF6        | 0.18  | 3.66E-01 | -0.12 | 5.67E-01 |
| RN7SL434P      | 0.24  | 2.15E-01 | -0.12 | 5.67E-01 |
| RP11-1334A24.5 | 0.19  | 3.38E-01 | -0.12 | 5.67E-01 |
| RP11-214K3.21  | -0.25 | 1.92E-01 | -0.12 | 5.67E-01 |
| RP11-455F5.6   | 0.26  | 1.77E-01 | -0.12 | 5.67E-01 |
| STKLD1         | -0.28 | 1.54E-01 | -0.12 | 5.67E-01 |
| TMSB4X         | -0.13 | 5.10E-01 | -0.12 | 5.67E-01 |
| XLOC_010292    | -0.30 | 1.25E-01 | -0.12 | 5.67E-01 |
| ZNF48          | 0.14  | 4.72E-01 | -0.12 | 5.67E-01 |
| CNIH4          | 0.19  | 3.39E-01 | 0.12  | 5.67E-01 |
| DDX52          | 0.27  | 1.66E-01 | 0.12  | 5.67E-01 |
| FTH1P1         | -0.08 | 6.97E-01 | 0.12  | 5.67E-01 |
| KIAA0753       | 0.12  | 5.44E-01 | 0.12  | 5.67E-01 |
| MFAP3          | 0.27  | 1.70E-01 | 0.12  | 5.67E-01 |
| MYL12BP1       | 0.17  | 3.97E-01 | 0.12  | 5.67E-01 |
| PKM            | 0.17  | 3.79E-01 | 0.12  | 5.67E-01 |
| RP11-44F14.5   | -0.11 | 5.60E-01 | 0.12  | 5.67E-01 |
| RP11-829H16.5  | 0.03  | 8.87E-01 | 0.12  | 5.67E-01 |
| ZFYVE26        | 0.07  | 7.33E-01 | 0.12  | 5.67E-01 |
| AC018867.1     | 0.08  | 6.68E-01 | -0.11 | 5.68E-01 |
| ACTA1          | 0.14  | 4.70E-01 | 0.11  | 5.68E-01 |
| AL158147.2     | -0.20 | 3.18E-01 | -0.11 | 5.68E-01 |
| C9orf131       | -0.05 | 7.84E-01 | -0.11 | 5.68E-01 |
| CASS4          | 0.13  | 4.96E-01 | 0.11  | 5.68E-01 |
| CTC-471J1.9    | -0.23 | 2.47E-01 | 0.11  | 5.68E-01 |
| CTD-2376I4.1   | 0.17  | 3.94E-01 | 0.11  | 5.68E-01 |

|                       |       |          |       |          |
|-----------------------|-------|----------|-------|----------|
| <b>CTD-3032H12.1</b>  | 0.14  | 4.75E-01 | 0.11  | 5.68E-01 |
| <b>DOK4</b>           | 0.08  | 6.87E-01 | 0.11  | 5.68E-01 |
| <b>EEF1A1P30</b>      | -0.18 | 3.58E-01 | -0.11 | 5.68E-01 |
| <b>FPGT</b>           | 0.06  | 7.46E-01 | 0.11  | 5.68E-01 |
| <b>ICAM2</b>          | -0.18 | 3.52E-01 | 0.11  | 5.68E-01 |
| <b>LINC00173</b>      | -0.14 | 4.68E-01 | 0.11  | 5.68E-01 |
| <b>LINC01011</b>      | -0.14 | 4.79E-01 | 0.11  | 5.68E-01 |
| <b>PCDH11Y</b>        | 0.04  | 8.37E-01 | 0.11  | 5.68E-01 |
| <b>PPP5D1</b>         | 0.09  | 6.50E-01 | 0.11  | 5.68E-01 |
| <b>RERGL</b>          | -0.22 | 2.54E-01 | 0.11  | 5.68E-01 |
| <b>RNA5SP20</b>       | -0.45 | 1.67E-02 | -0.11 | 5.68E-01 |
| <b>RP11-176D17.3</b>  | -0.40 | 3.41E-02 | -0.11 | 5.68E-01 |
| <b>RP11-215P8.2</b>   | -0.06 | 7.64E-01 | -0.11 | 5.68E-01 |
| <b>RP11-333E1.1</b>   | -0.16 | 4.13E-01 | -0.11 | 5.68E-01 |
| <b>RP11-370I10.11</b> | -0.18 | 3.57E-01 | -0.11 | 5.68E-01 |
| <b>RP11-5N11.2</b>    | -0.13 | 5.08E-01 | -0.11 | 5.68E-01 |
| <b>RP3-368A4.5</b>    | -0.11 | 5.89E-01 | 0.11  | 5.68E-01 |
| <b>SFR1</b>           | 0.16  | 4.28E-01 | 0.11  | 5.68E-01 |
| <b>SKIDA1</b>         | -0.03 | 8.90E-01 | -0.11 | 5.68E-01 |
| <b>SPG20-AS1</b>      | 0.45  | 1.72E-02 | -0.11 | 5.68E-01 |
| <b>SYPL1</b>          | 0.43  | 2.15E-02 | 0.11  | 5.68E-01 |
| <b>TLL7-IT1</b>       | -0.27 | 1.68E-01 | 0.11  | 5.68E-01 |
| <b>USP8</b>           | 0.09  | 6.49E-01 | 0.11  | 5.68E-01 |
| <b>AC091814.2</b>     | -0.15 | 4.38E-01 | 0.11  | 5.69E-01 |
| <b>AC109333.10</b>    | 0.03  | 8.66E-01 | 0.11  | 5.69E-01 |
| <b>C3AR1</b>          | 0.04  | 8.32E-01 | 0.11  | 5.69E-01 |
| <b>CTD-2363C16.1</b>  | 0.09  | 6.45E-01 | 0.11  | 5.69E-01 |
| <b>DPAGT1</b>         | 0.10  | 5.95E-01 | 0.11  | 5.69E-01 |
| <b>GAPLINC</b>        | -0.06 | 7.62E-01 | 0.11  | 5.69E-01 |
| <b>GPR107</b>         | 0.36  | 5.72E-02 | 0.11  | 5.69E-01 |
| <b>KRT18P4</b>        | -0.31 | 1.12E-01 | 0.11  | 5.69E-01 |
| <b>LRRC23</b>         | -0.06 | 7.72E-01 | -0.11 | 5.69E-01 |
| <b>MESDC2</b>         | 0.20  | 3.03E-01 | 0.11  | 5.69E-01 |
| <b>MIR4258</b>        | -0.27 | 1.62E-01 | 0.11  | 5.69E-01 |
| <b>MRPL36</b>         | -0.11 | 5.74E-01 | 0.11  | 5.69E-01 |
| <b>MTCYBP21</b>       | -0.20 | 3.17E-01 | -0.11 | 5.69E-01 |
| <b>POLR1D</b>         | 0.10  | 5.95E-01 | 0.11  | 5.69E-01 |
| <b>RP11-30L3.2</b>    | 0.03  | 8.74E-01 | -0.11 | 5.69E-01 |
| <b>RP11-466F5.6</b>   | -0.17 | 3.92E-01 | -0.11 | 5.69E-01 |
| <b>RP11-507E23.1</b>  | 0.04  | 8.44E-01 | -0.11 | 5.69E-01 |
| <b>RP11-535A19.2</b>  | 0.01  | 9.75E-01 | -0.11 | 5.69E-01 |
| <b>RP11-54H7.4</b>    | 0.08  | 6.71E-01 | -0.11 | 5.69E-01 |
| <b>RP11-651P23.4</b>  | 0.27  | 1.72E-01 | 0.11  | 5.69E-01 |
| <b>RP11-807C20.2</b>  | -0.31 | 1.06E-01 | 0.11  | 5.69E-01 |
| <b>RPL12P11</b>       | -0.08 | 6.83E-01 | -0.11 | 5.69E-01 |
| <b>SAMD13</b>         | 0.08  | 6.88E-01 | 0.11  | 5.69E-01 |
| <b>SPINK9</b>         | -0.05 | 7.88E-01 | 0.11  | 5.69E-01 |

|                |       |          |       |          |
|----------------|-------|----------|-------|----------|
| TAF9BP1        | -0.22 | 2.62E-01 | 0.11  | 5.69E-01 |
| TMTC4          | -0.02 | 9.15E-01 | 0.11  | 5.69E-01 |
| TNFRSF21       | 0.19  | 3.45E-01 | 0.11  | 5.69E-01 |
| TYSND1         | 0.04  | 8.46E-01 | 0.11  | 5.69E-01 |
| VPS13C         | -0.03 | 8.73E-01 | -0.11 | 5.69E-01 |
| ZNF622         | 0.05  | 8.07E-01 | 0.11  | 5.69E-01 |
| ACYP2          | 0.13  | 5.14E-01 | 0.11  | 5.70E-01 |
| ARRDC1-AS1     | -0.09 | 6.36E-01 | 0.11  | 5.70E-01 |
| ATP6V1F        | 0.15  | 4.55E-01 | 0.11  | 5.70E-01 |
| BLNK           | 0.23  | 2.40E-01 | 0.11  | 5.70E-01 |
| C6orf226       | -0.20 | 3.05E-01 | 0.11  | 5.70E-01 |
| CTC-250P20.1   | 0.03  | 8.94E-01 | -0.11 | 5.70E-01 |
| CTC-325H20.4   | 0.09  | 6.33E-01 | -0.11 | 5.70E-01 |
| CTD-2012K14.6  | 0.11  | 5.76E-01 | -0.11 | 5.70E-01 |
| CTD-2036P10.6  | 0.05  | 7.82E-01 | -0.11 | 5.70E-01 |
| CTD-2201E9.2   | -0.15 | 4.57E-01 | -0.11 | 5.70E-01 |
| DEFB103B       | -0.01 | 9.61E-01 | 0.11  | 5.70E-01 |
| KCNV2          | 0.05  | 8.16E-01 | -0.11 | 5.70E-01 |
| MED16          | 0.29  | 1.38E-01 | 0.11  | 5.70E-01 |
| MRPL34         | 0.04  | 8.25E-01 | -0.11 | 5.70E-01 |
| PAK1IP1        | 0.14  | 4.83E-01 | -0.11 | 5.70E-01 |
| RNU4-9P        | -0.13 | 4.98E-01 | 0.11  | 5.70E-01 |
| RNU6-188P      | -0.09 | 6.67E-01 | 0.11  | 5.70E-01 |
| RP11-158M2.5   | 0.02  | 9.08E-01 | -0.11 | 5.70E-01 |
| RP11-196G18.22 | -0.06 | 7.79E-01 | -0.11 | 5.70E-01 |
| RP11-323I15.5  | 0.06  | 7.62E-01 | -0.11 | 5.70E-01 |
| RP11-351O1.3   | -0.02 | 9.23E-01 | -0.11 | 5.70E-01 |
| RP11-372M18.2  | 0.12  | 5.56E-01 | -0.11 | 5.70E-01 |
| RP11-378E13.4  | -0.29 | 1.39E-01 | -0.11 | 5.70E-01 |
| RP3-400B16.1   | -0.07 | 7.16E-01 | -0.11 | 5.70E-01 |
| SIRT4          | 0.24  | 2.17E-01 | -0.11 | 5.70E-01 |
| SQLE           | 0.22  | 2.61E-01 | 0.11  | 5.70E-01 |
| THOC3          | 0.20  | 2.99E-01 | 0.11  | 5.70E-01 |
| XRN1           | 0.08  | 6.72E-01 | -0.11 | 5.70E-01 |
| YBX1P4         | -0.30 | 1.21E-01 | -0.11 | 5.70E-01 |
| C6orf3         | 0.23  | 2.30E-01 | 0.11  | 5.72E-01 |
| CCNK           | -0.12 | 5.56E-01 | -0.11 | 5.72E-01 |
| COQ6           | -0.28 | 1.44E-01 | -0.11 | 5.72E-01 |
| CTB-31O20.4    | 0.00  | 9.89E-01 | -0.11 | 5.72E-01 |
| CTC-559E9.6    | -0.17 | 3.94E-01 | -0.11 | 5.72E-01 |
| G31400         | 0.03  | 8.89E-01 | 0.11  | 5.72E-01 |
| G40079         | -0.05 | 8.14E-01 | -0.11 | 5.72E-01 |
| GLTPD2         | 0.17  | 3.75E-01 | 0.11  | 5.72E-01 |
| LINC00998      | -0.17 | 3.96E-01 | -0.11 | 5.72E-01 |
| MAGI3          | -0.19 | 3.44E-01 | 0.11  | 5.72E-01 |
| OVCH1-AS1      | 0.03  | 8.77E-01 | -0.11 | 5.72E-01 |
| PCDHB6         | -0.06 | 7.71E-01 | -0.11 | 5.72E-01 |

|                       |       |          |       |          |
|-----------------------|-------|----------|-------|----------|
| <b>R3HDM4</b>         | 0.29  | 1.38E-01 | 0.11  | 5.72E-01 |
| <b>RMDN2</b>          | 0.24  | 2.14E-01 | 0.11  | 5.72E-01 |
| <b>RNASE4</b>         | -0.34 | 7.72E-02 | 0.11  | 5.72E-01 |
| <b>RNU6-151P</b>      | -0.11 | 5.91E-01 | 0.11  | 5.72E-01 |
| <b>RP11-119F7.5</b>   | 0.23  | 2.38E-01 | 0.11  | 5.72E-01 |
| <b>RP11-173A6.2</b>   | -0.29 | 1.34E-01 | 0.11  | 5.72E-01 |
| <b>RP11-588L15.1</b>  | 0.00  | 9.86E-01 | 0.11  | 5.72E-01 |
| <b>RP11-792A8.4</b>   | 0.09  | 6.63E-01 | 0.11  | 5.72E-01 |
| <b>RP11-815J21.1</b>  | -0.19 | 3.44E-01 | -0.11 | 5.72E-01 |
| <b>RP5-832C2.5</b>    | -0.03 | 8.75E-01 | -0.11 | 5.72E-01 |
| <b>SIAH2-AS1</b>      | -0.19 | 3.41E-01 | -0.11 | 5.72E-01 |
| <b>SLC22A23</b>       | 0.01  | 9.64E-01 | 0.11  | 5.72E-01 |
| <b>SNX16</b>          | 0.01  | 9.57E-01 | -0.11 | 5.72E-01 |
| <b>TSFM</b>           | 0.16  | 4.16E-01 | 0.11  | 5.72E-01 |
| <b>WDR26</b>          | 0.14  | 4.65E-01 | 0.11  | 5.72E-01 |
| <b>AL157392.1</b>     | -0.16 | 4.26E-01 | 0.11  | 5.73E-01 |
| <b>C7orf71</b>        | 0.15  | 4.54E-01 | -0.11 | 5.73E-01 |
| <b>CFAP47</b>         | 0.00  | 9.83E-01 | -0.11 | 5.73E-01 |
| <b>DAB1</b>           | -0.03 | 8.63E-01 | -0.11 | 5.73E-01 |
| <b>DAZAP2P1</b>       | 0.18  | 3.63E-01 | -0.11 | 5.73E-01 |
| <b>DDA1</b>           | 0.12  | 5.55E-01 | 0.11  | 5.73E-01 |
| <b>DUXAP7</b>         | -0.18 | 3.46E-01 | -0.11 | 5.73E-01 |
| <b>FAM182B</b>        | 0.14  | 4.81E-01 | -0.11 | 5.73E-01 |
| <b>G31829</b>         | 0.25  | 1.91E-01 | 0.11  | 5.73E-01 |
| <b>GAK</b>            | 0.22  | 2.62E-01 | 0.11  | 5.73E-01 |
| <b>GRIK3</b>          | -0.39 | 4.14E-02 | -0.11 | 5.73E-01 |
| <b>ISG20L2</b>        | 0.24  | 2.10E-01 | 0.11  | 5.73E-01 |
| <b>KB-1930G5.4</b>    | -0.11 | 5.81E-01 | 0.11  | 5.73E-01 |
| <b>KRTAP5-5</b>       | 0.14  | 4.65E-01 | 0.11  | 5.73E-01 |
| <b>MAEA</b>           | 0.08  | 7.00E-01 | 0.11  | 5.73E-01 |
| <b>PMVK</b>           | -0.04 | 8.41E-01 | 0.11  | 5.73E-01 |
| <b>RP1-145M24.1</b>   | 0.14  | 4.89E-01 | -0.11 | 5.73E-01 |
| <b>RP11-1070A24.1</b> | 0.17  | 3.89E-01 | 0.11  | 5.73E-01 |
| <b>RP11-37B2.1</b>    | -0.30 | 1.22E-01 | -0.11 | 5.73E-01 |
| <b>RP11-426C22.4</b>  | 0.04  | 8.36E-01 | -0.11 | 5.73E-01 |
| <b>RP11-67L14.1</b>   | 0.25  | 1.98E-01 | -0.11 | 5.73E-01 |
| <b>RP4-800F24.1</b>   | -0.33 | 8.67E-02 | -0.11 | 5.73E-01 |
| <b>RPL23AP40</b>      | 0.32  | 9.24E-02 | -0.11 | 5.73E-01 |
| <b>SAMD3</b>          | -0.11 | 5.81E-01 | -0.11 | 5.73E-01 |
| <b>SEC14L5</b>        | -0.09 | 6.56E-01 | -0.11 | 5.73E-01 |
| <b>SMIM6</b>          | 0.23  | 2.37E-01 | -0.11 | 5.73E-01 |
| <b>TRAM2-AS1</b>      | -0.26 | 1.76E-01 | -0.11 | 5.73E-01 |
| <b>UPK3B</b>          | -0.02 | 9.37E-01 | -0.11 | 5.73E-01 |
| <b>YBX1P3</b>         | -0.43 | 2.28E-02 | 0.11  | 5.73E-01 |
| <b>ZNF84</b>          | -0.34 | 7.95E-02 | -0.11 | 5.73E-01 |
| <b>AC008269.2</b>     | -0.30 | 1.16E-01 | -0.11 | 5.74E-01 |
| <b>AC104655.3</b>     | -0.04 | 8.21E-01 | 0.11  | 5.74E-01 |

|               |       |          |       |          |
|---------------|-------|----------|-------|----------|
| ACER1         | 0.00  | 9.91E-01 | 0.11  | 5.74E-01 |
| ADAT2         | 0.08  | 6.91E-01 | -0.11 | 5.74E-01 |
| ANKRD36B      | -0.41 | 2.82E-02 | -0.11 | 5.74E-01 |
| BOC           | -0.12 | 5.57E-01 | -0.11 | 5.74E-01 |
| CDK14         | -0.22 | 2.71E-01 | -0.11 | 5.74E-01 |
| CNN1          | 0.10  | 6.19E-01 | 0.11  | 5.74E-01 |
| CTB-186G2.4   | -0.20 | 3.13E-01 | -0.11 | 5.74E-01 |
| DAZAP2        | 0.17  | 3.86E-01 | 0.11  | 5.74E-01 |
| ECSCR         | -0.15 | 4.46E-01 | -0.11 | 5.74E-01 |
| ELFN1         | 0.01  | 9.76E-01 | 0.11  | 5.74E-01 |
| G28383        | 0.26  | 1.85E-01 | 0.11  | 5.74E-01 |
| GART          | 0.17  | 3.99E-01 | 0.11  | 5.74E-01 |
| KIAA0040      | -0.01 | 9.65E-01 | 0.11  | 5.74E-01 |
| LAMP3         | 0.28  | 1.56E-01 | 0.11  | 5.74E-01 |
| LCE1B         | 0.01  | 9.74E-01 | 0.11  | 5.74E-01 |
| LINC00493     | 0.06  | 7.65E-01 | -0.11 | 5.74E-01 |
| LINC01250     | -0.01 | 9.65E-01 | 0.11  | 5.74E-01 |
| NUCB1-AS1     | -0.08 | 6.71E-01 | -0.11 | 5.74E-01 |
| POLD1         | -0.04 | 8.46E-01 | 0.11  | 5.74E-01 |
| PRPF38B       | 0.01  | 9.40E-01 | -0.11 | 5.74E-01 |
| PTPRR         | -0.22 | 2.69E-01 | 0.11  | 5.74E-01 |
| PXT1          | -0.15 | 4.34E-01 | 0.11  | 5.74E-01 |
| RAP1GAP       | 0.21  | 2.88E-01 | 0.11  | 5.74E-01 |
| RN7SL269P     | -0.19 | 3.27E-01 | -0.11 | 5.74E-01 |
| RP11-23J9.5   | -0.05 | 8.09E-01 | -0.11 | 5.74E-01 |
| RP11-267M23.6 | -0.20 | 3.03E-01 | -0.11 | 5.74E-01 |
| RP11-479F13.1 | 0.09  | 6.38E-01 | -0.11 | 5.74E-01 |
| RP11-546K22.1 | 0.08  | 6.73E-01 | -0.11 | 5.74E-01 |
| RP11-592N21.1 | -0.30 | 1.25E-01 | -0.11 | 5.74E-01 |
| RP11-671M22.4 | 0.04  | 8.42E-01 | -0.11 | 5.74E-01 |
| RP11-720N19.1 | 0.00  | 9.83E-01 | 0.11  | 5.74E-01 |
| RP11-843B15.4 | -0.06 | 7.60E-01 | -0.11 | 5.74E-01 |
| SLC4A10       | 0.22  | 2.66E-01 | -0.11 | 5.74E-01 |
| SLC9A9-AS1    | -0.01 | 9.42E-01 | 0.11  | 5.74E-01 |
| SUCLG1        | 0.17  | 3.79E-01 | 0.11  | 5.74E-01 |
| TRIM66        | -0.09 | 6.32E-01 | -0.11 | 5.74E-01 |
| TTN           | 0.00  | 9.91E-01 | -0.11 | 5.74E-01 |
| TYW3          | 0.25  | 2.09E-01 | -0.11 | 5.74E-01 |
| UFL1          | 0.03  | 8.99E-01 | -0.11 | 5.74E-01 |
| VPS26B        | 0.13  | 5.01E-01 | -0.11 | 5.74E-01 |
| VRK1          | 0.17  | 3.95E-01 | -0.11 | 5.74E-01 |
| BPNT1         | 0.16  | 4.24E-01 | 0.11  | 5.75E-01 |
| CACNG8        | -0.43 | 2.13E-02 | -0.11 | 5.75E-01 |
| CLDN20        | -0.06 | 7.46E-01 | -0.11 | 5.75E-01 |
| COX14         | 0.27  | 1.58E-01 | 0.11  | 5.75E-01 |
| CTD-2547H18.1 | -0.07 | 7.41E-01 | -0.11 | 5.75E-01 |
| DHODH         | 0.06  | 7.59E-01 | 0.11  | 5.75E-01 |

|                |       |          |       |          |
|----------------|-------|----------|-------|----------|
| DUTP7          | 0.22  | 2.54E-01 | -0.11 | 5.75E-01 |
| MBD1           | 0.10  | 6.25E-01 | -0.11 | 5.75E-01 |
| NFATC1         | -0.18 | 3.59E-01 | 0.11  | 5.75E-01 |
| P2RY11         | 0.20  | 3.06E-01 | -0.11 | 5.75E-01 |
| PAPPA          | 0.04  | 8.38E-01 | 0.11  | 5.75E-01 |
| RAB44          | -0.17 | 3.85E-01 | -0.11 | 5.75E-01 |
| RN7SL502P      | -0.11 | 5.82E-01 | -0.11 | 5.75E-01 |
| RNU6-33P       | -0.37 | 5.07E-02 | 0.11  | 5.75E-01 |
| RNU7-28P       | -0.14 | 4.82E-01 | -0.11 | 5.75E-01 |
| RP11-295G20.2  | 0.26  | 1.78E-01 | 0.11  | 5.75E-01 |
| RP11-45P15.4   | -0.02 | 9.36E-01 | -0.11 | 5.75E-01 |
| RP11-69H7.4    | -0.02 | 9.00E-01 | -0.11 | 5.75E-01 |
| RP11-84D1.1    | 0.11  | 5.82E-01 | -0.11 | 5.75E-01 |
| RP4-565E6.1    | -0.23 | 2.47E-01 | 0.11  | 5.75E-01 |
| RP5-1050D4.5   | 0.21  | 2.75E-01 | -0.11 | 5.75E-01 |
| RRM2B          | 0.07  | 7.42E-01 | 0.11  | 5.75E-01 |
| SCAMP3         | 0.09  | 6.33E-01 | 0.11  | 5.75E-01 |
| SLC25A35       | 0.34  | 7.79E-02 | -0.11 | 5.75E-01 |
| SQRDL          | 0.22  | 2.60E-01 | 0.11  | 5.75E-01 |
| TBC1D14        | -0.08 | 6.94E-01 | 0.11  | 5.75E-01 |
| ASB2           | 0.40  | 3.58E-02 | 0.11  | 5.76E-01 |
| CCDC136        | -0.19 | 3.46E-01 | 0.11  | 5.76E-01 |
| CEACAM6        | 0.10  | 6.14E-01 | -0.11 | 5.76E-01 |
| CTB-39G8.3     | 0.12  | 5.54E-01 | -0.11 | 5.76E-01 |
| CYCSP29        | 0.05  | 8.13E-01 | -0.11 | 5.76E-01 |
| FAM64A         | 0.13  | 5.21E-01 | 0.11  | 5.76E-01 |
| G22271         | 0.06  | 7.53E-01 | -0.11 | 5.76E-01 |
| GIMAP5         | 0.03  | 8.71E-01 | -0.11 | 5.76E-01 |
| GOLGA6A        | 0.27  | 1.64E-01 | -0.11 | 5.76E-01 |
| GPATCH2L       | -0.05 | 7.84E-01 | -0.11 | 5.76E-01 |
| HIST2H2BA      | 0.03  | 8.71E-01 | 0.11  | 5.76E-01 |
| HIVEP3         | 0.00  | 9.81E-01 | 0.11  | 5.76E-01 |
| HPS4           | -0.14 | 4.85E-01 | -0.11 | 5.76E-01 |
| LRR37A5P       | -0.15 | 4.41E-01 | -0.11 | 5.76E-01 |
| LRRFIP1        | 0.07  | 7.23E-01 | 0.11  | 5.76E-01 |
| MAP7D3         | -0.14 | 4.77E-01 | -0.11 | 5.76E-01 |
| OBP2B          | -0.09 | 6.42E-01 | -0.11 | 5.76E-01 |
| PRR13P2        | -0.01 | 9.43E-01 | 0.11  | 5.76E-01 |
| RABEP1         | 0.07  | 7.09E-01 | 0.11  | 5.76E-01 |
| RP1-134O19.3   | -0.14 | 4.66E-01 | 0.11  | 5.76E-01 |
| RP11-1110F20.1 | -0.25 | 1.97E-01 | 0.11  | 5.76E-01 |
| RP11-1379J22.2 | -0.15 | 4.49E-01 | -0.11 | 5.76E-01 |
| RP11-264L1.1   | 0.12  | 5.42E-01 | 0.11  | 5.76E-01 |
| RP11-282E4.1   | -0.27 | 1.63E-01 | -0.11 | 5.76E-01 |
| RP11-380O24.1  | 0.27  | 1.64E-01 | 0.11  | 5.76E-01 |
| RP11-410D17.2  | -0.03 | 8.85E-01 | -0.11 | 5.76E-01 |
| RP11-417J8.3   | 0.25  | 2.01E-01 | -0.11 | 5.76E-01 |

|                       |       |          |       |          |
|-----------------------|-------|----------|-------|----------|
| <b>RP11-47122.1</b>   | 0.04  | 8.26E-01 | -0.11 | 5.76E-01 |
| <b>RP11-50D9.3</b>    | -0.27 | 1.63E-01 | -0.11 | 5.76E-01 |
| <b>RP11-551L14.7</b>  | 0.05  | 7.89E-01 | -0.11 | 5.76E-01 |
| <b>SC5D</b>           | 0.27  | 1.71E-01 | 0.11  | 5.76E-01 |
| <b>SFTPA1</b>         | 0.16  | 4.25E-01 | 0.11  | 5.76E-01 |
| <b>SLC17A9</b>        | 0.03  | 8.71E-01 | -0.11 | 5.76E-01 |
| <b>SLC30A1</b>        | 0.22  | 2.54E-01 | 0.11  | 5.76E-01 |
| <b>SPHK1</b>          | 0.16  | 4.16E-01 | 0.11  | 5.76E-01 |
| <b>TNFRSF11B</b>      | -0.21 | 2.75E-01 | -0.11 | 5.76E-01 |
| <b>UNC13B</b>         | 0.15  | 4.59E-01 | 0.11  | 5.76E-01 |
| <b>WDR74</b>          | 0.06  | 7.61E-01 | 0.11  | 5.76E-01 |
| <b>ZCCHC2</b>         | -0.22 | 2.56E-01 | -0.11 | 5.76E-01 |
| <b>AC010976.2</b>     | -0.04 | 8.25E-01 | -0.11 | 5.77E-01 |
| <b>AC015971.2</b>     | 0.11  | 5.63E-01 | -0.11 | 5.77E-01 |
| <b>AC018738.2</b>     | -0.14 | 4.73E-01 | -0.11 | 5.77E-01 |
| <b>AC064875.2</b>     | -0.06 | 7.68E-01 | -0.11 | 5.77E-01 |
| <b>ATP2B2</b>         | -0.16 | 4.24E-01 | -0.11 | 5.77E-01 |
| <b>CH17-360D5.3</b>   | -0.03 | 8.94E-01 | -0.11 | 5.77E-01 |
| <b>FNDC3A</b>         | -0.10 | 6.27E-01 | -0.11 | 5.77E-01 |
| <b>LINC00539</b>      | 0.43  | 2.21E-02 | -0.11 | 5.77E-01 |
| <b>NAA30</b>          | 0.03  | 8.93E-01 | -0.11 | 5.77E-01 |
| <b>PKIA-AS1</b>       | -0.20 | 3.15E-01 | -0.11 | 5.77E-01 |
| <b>PROSER2-AS1</b>    | -0.15 | 4.40E-01 | -0.11 | 5.77E-01 |
| <b>RP11-1212A22.1</b> | -0.05 | 8.05E-01 | -0.11 | 5.77E-01 |
| <b>RP11-219B4.5</b>   | 0.08  | 6.79E-01 | -0.11 | 5.77E-01 |
| <b>RP3-395P12.2</b>   | 0.32  | 9.93E-02 | -0.11 | 5.77E-01 |
| <b>RP4-622L5.7</b>    | -0.03 | 8.83E-01 | -0.11 | 5.77E-01 |
| <b>SLC16A1-AS1</b>    | 0.02  | 9.02E-01 | -0.11 | 5.77E-01 |
| <b>TMEM221</b>        | 0.29  | 1.33E-01 | -0.11 | 5.77E-01 |
| <b>ACOX1</b>          | -0.02 | 9.34E-01 | 0.11  | 5.77E-01 |
| <b>C1orf189</b>       | 0.01  | 9.55E-01 | 0.11  | 5.77E-01 |
| <b>CLPP</b>           | 0.47  | 1.21E-02 | 0.11  | 5.77E-01 |
| <b>CTD-2288F12.1</b>  | 0.18  | 3.69E-01 | 0.11  | 5.77E-01 |
| <b>PHF7</b>           | 0.05  | 8.01E-01 | 0.11  | 5.77E-01 |
| <b>RGAG1</b>          | -0.26 | 1.88E-01 | 0.11  | 5.77E-01 |
| <b>SELE</b>           | 0.01  | 9.76E-01 | 0.11  | 5.77E-01 |
| <b>TINCR</b>          | -0.17 | 3.74E-01 | 0.11  | 5.77E-01 |
| <b>ARHGEF5</b>        | 0.01  | 9.75E-01 | -0.11 | 5.78E-01 |
| <b>ATP6V1G1P6</b>     | 0.09  | 6.62E-01 | -0.11 | 5.78E-01 |
| <b>CDCA2</b>          | 0.03  | 8.81E-01 | 0.11  | 5.78E-01 |
| <b>CDK5</b>           | 0.27  | 1.72E-01 | 0.11  | 5.78E-01 |
| <b>CHRNA3</b>         | 0.05  | 7.97E-01 | 0.11  | 5.78E-01 |
| <b>CKB</b>            | 0.11  | 5.73E-01 | 0.11  | 5.78E-01 |
| <b>ELOVL1</b>         | 0.22  | 2.61E-01 | 0.11  | 5.78E-01 |
| <b>ESPN</b>           | -0.09 | 6.33E-01 | -0.11 | 5.78E-01 |
| <b>FAM25BP</b>        | 0.36  | 6.07E-02 | 0.11  | 5.78E-01 |
| <b>FBN2</b>           | 0.01  | 9.69E-01 | 0.11  | 5.78E-01 |



|                      |       |          |       |          |
|----------------------|-------|----------|-------|----------|
| <b>GMPR</b>          | -0.34 | 7.82E-02 | -0.11 | 5.78E-01 |
| <b>GUSBP9</b>        | -0.07 | 7.30E-01 | -0.11 | 5.78E-01 |
| <b>KRTAP4-2</b>      | -0.17 | 3.73E-01 | 0.11  | 5.78E-01 |
| <b>KRTAP4-5</b>      | -0.16 | 4.11E-01 | -0.11 | 5.78E-01 |
| <b>MIR200C</b>       | 0.23  | 2.33E-01 | -0.11 | 5.78E-01 |
| <b>NDUFB6</b>        | 0.09  | 6.42E-01 | -0.11 | 5.78E-01 |
| <b>PCCA-AS1</b>      | -0.01 | 9.78E-01 | 0.11  | 5.78E-01 |
| <b>POLR3E</b>        | -0.09 | 6.33E-01 | 0.11  | 5.78E-01 |
| <b>RN7SL683P</b>     | 0.07  | 7.30E-01 | 0.11  | 5.78E-01 |
| <b>RP11-160A9.3</b>  | -0.25 | 1.92E-01 | -0.11 | 5.78E-01 |
| <b>RP11-217B7.3</b>  | -0.07 | 7.07E-01 | 0.11  | 5.78E-01 |
| <b>RP11-219D15.3</b> | -0.06 | 7.61E-01 | 0.11  | 5.78E-01 |
| <b>RP11-265N7.1</b>  | -0.04 | 8.26E-01 | -0.11 | 5.78E-01 |
| <b>RP11-465N4.5</b>  | -0.13 | 4.95E-01 | -0.11 | 5.78E-01 |
| <b>RP5-823G15.5</b>  | -0.21 | 2.82E-01 | -0.11 | 5.78E-01 |
| <b>RPL21</b>         | 0.09  | 6.42E-01 | -0.11 | 5.78E-01 |
| <b>SHMT1P1</b>       | -0.17 | 3.95E-01 | -0.11 | 5.78E-01 |
| <b>TRIP6</b>         | 0.19  | 3.26E-01 | 0.11  | 5.78E-01 |
| <b>TUB</b>           | -0.20 | 3.17E-01 | -0.11 | 5.78E-01 |
| <b>VCP</b>           | 0.14  | 4.82E-01 | 0.11  | 5.78E-01 |
| <b>XLOC_001195</b>   | -0.01 | 9.46E-01 | 0.11  | 5.78E-01 |
| <b>XLOC_009592</b>   | -0.19 | 3.20E-01 | -0.11 | 5.78E-01 |
| <b>YKT6</b>          | 0.24  | 2.13E-01 | 0.11  | 5.78E-01 |
| <b>AC016292.3</b>    | -0.20 | 3.05E-01 | -0.11 | 5.79E-01 |
| <b>AC069155.1</b>    | 0.02  | 9.03E-01 | -0.11 | 5.79E-01 |
| <b>ALOX12B</b>       | 0.14  | 4.79E-01 | 0.11  | 5.79E-01 |
| <b>ALOX15B</b>       | 0.24  | 2.20E-01 | -0.11 | 5.79E-01 |
| <b>C2orf69</b>       | 0.17  | 3.88E-01 | -0.11 | 5.79E-01 |
| <b>CEBPB</b>         | 0.09  | 6.45E-01 | -0.11 | 5.79E-01 |
| <b>CMB9-22P13.2</b>  | -0.07 | 7.40E-01 | 0.11  | 5.79E-01 |
| <b>CTD-2516F10.2</b> | 0.15  | 4.51E-01 | 0.11  | 5.79E-01 |
| <b>CTD-3253I12.1</b> | -0.18 | 3.46E-01 | -0.11 | 5.79E-01 |
| <b>DAGLA</b>         | -0.18 | 3.60E-01 | 0.11  | 5.79E-01 |
| <b>IFT172</b>        | -0.14 | 4.66E-01 | -0.11 | 5.79E-01 |
| <b>LCN12</b>         | -0.32 | 9.71E-02 | -0.11 | 5.79E-01 |
| <b>MIR5190</b>       | -0.31 | 1.09E-01 | 0.11  | 5.79E-01 |
| <b>MSANTD2</b>       | -0.07 | 7.27E-01 | -0.11 | 5.79E-01 |
| <b>PABPC3</b>        | -0.24 | 2.22E-01 | 0.11  | 5.79E-01 |
| <b>PARD3B</b>        | -0.27 | 1.58E-01 | -0.11 | 5.79E-01 |
| <b>PCDHA13</b>       | -0.27 | 1.70E-01 | 0.11  | 5.79E-01 |
| <b>PGAP2</b>         | 0.19  | 3.27E-01 | 0.11  | 5.79E-01 |
| <b>PHBP21</b>        | 0.23  | 2.44E-01 | -0.11 | 5.79E-01 |
| <b>PTGDS</b>         | 0.16  | 4.26E-01 | 0.11  | 5.79E-01 |
| <b>RNU2-33P</b>      | -0.21 | 2.80E-01 | -0.11 | 5.79E-01 |
| <b>RNU6-1146P</b>    | -0.23 | 2.49E-01 | -0.11 | 5.79E-01 |
| <b>RP11-290F5.2</b>  | 0.17  | 3.96E-01 | 0.11  | 5.79E-01 |
| <b>RP11-317P15.4</b> | 0.21  | 2.75E-01 | 0.11  | 5.79E-01 |

|               |       |          |       |          |
|---------------|-------|----------|-------|----------|
| RPS15         | 0.07  | 7.17E-01 | 0.11  | 5.79E-01 |
| SLC16A12      | 0.14  | 4.70E-01 | 0.11  | 5.79E-01 |
| SLC25A41      | 0.58  | 1.12E-03 | 0.11  | 5.79E-01 |
| SNORA62       | -0.14 | 4.82E-01 | 0.11  | 5.79E-01 |
| TCTN1         | -0.11 | 5.77E-01 | -0.11 | 5.79E-01 |
| TMSB10        | -0.01 | 9.55E-01 | 0.11  | 5.79E-01 |
| ZNF397        | -0.14 | 4.72E-01 | -0.11 | 5.79E-01 |
| ABCG2         | -0.29 | 1.42E-01 | -0.11 | 5.80E-01 |
| AC011475.1    | -0.07 | 7.24E-01 | -0.11 | 5.80E-01 |
| MIR425        | 0.14  | 4.86E-01 | -0.11 | 5.80E-01 |
| MIR4305       | -0.51 | 5.83E-03 | -0.11 | 5.80E-01 |
| NNT           | -0.08 | 6.78E-01 | -0.11 | 5.80E-01 |
| RCVRN         | -0.10 | 6.10E-01 | -0.11 | 5.80E-01 |
| RN7SKP30      | -0.15 | 4.31E-01 | -0.11 | 5.80E-01 |
| RNF125        | 0.06  | 7.77E-01 | -0.11 | 5.80E-01 |
| RP1-136B1.1   | -0.02 | 9.09E-01 | -0.11 | 5.80E-01 |
| SUB1P4        | 0.38  | 4.87E-02 | -0.11 | 5.80E-01 |
| TLK1          | -0.13 | 4.93E-01 | -0.11 | 5.80E-01 |
| TOMM20        | 0.13  | 5.01E-01 | -0.11 | 5.80E-01 |
| WDFY3         | -0.14 | 4.74E-01 | -0.11 | 5.80E-01 |
| XLOC_000152   | -0.28 | 1.44E-01 | -0.11 | 5.80E-01 |
| CTC-498J12.3  | -0.11 | 5.75E-01 | 0.11  | 5.80E-01 |
| FRMD7         | 0.19  | 3.29E-01 | 0.11  | 5.80E-01 |
| GPAA1         | 0.18  | 3.67E-01 | 0.11  | 5.80E-01 |
| KRTAP2-4      | -0.21 | 2.85E-01 | 0.11  | 5.80E-01 |
| LRCH4         | -0.06 | 7.49E-01 | 0.11  | 5.80E-01 |
| MICAL2        | 0.11  | 5.85E-01 | 0.11  | 5.80E-01 |
| PPID          | -0.11 | 5.90E-01 | 0.11  | 5.80E-01 |
| RP11-178L8.3  | 0.04  | 8.55E-01 | 0.11  | 5.80E-01 |
| RP11-293K19.1 | 0.20  | 2.97E-01 | 0.11  | 5.80E-01 |
| RP11-299G20.2 | 0.13  | 5.16E-01 | 0.11  | 5.80E-01 |
| SCYL1         | 0.01  | 9.56E-01 | 0.11  | 5.80E-01 |
| SNORD56B      | -0.12 | 5.29E-01 | 0.11  | 5.80E-01 |
| TMEM41A       | 0.22  | 2.65E-01 | 0.11  | 5.80E-01 |
| TOMM7         | 0.05  | 7.87E-01 | 0.11  | 5.80E-01 |
| TRIM7         | 0.03  | 8.66E-01 | 0.11  | 5.80E-01 |
| AC003989.3    | 0.03  | 8.71E-01 | -0.11 | 5.81E-01 |
| AGA           | 0.25  | 1.99E-01 | 0.11  | 5.81E-01 |
| AGT           | -0.53 | 3.39E-03 | -0.11 | 5.81E-01 |
| AL359922.1    | -0.18 | 3.51E-01 | 0.11  | 5.81E-01 |
| CAMK1         | -0.04 | 8.51E-01 | 0.11  | 5.81E-01 |
| CCDC186       | 0.00  | 9.94E-01 | -0.11 | 5.81E-01 |
| CHST11        | 0.38  | 4.54E-02 | 0.11  | 5.81E-01 |
| CTC-260F20.3  | 0.13  | 5.07E-01 | -0.11 | 5.81E-01 |
| CTD-3214H19.6 | -0.33 | 8.81E-02 | 0.11  | 5.81E-01 |
| FBXO41        | 0.11  | 5.67E-01 | 0.11  | 5.81E-01 |
| G12586        | 0.17  | 3.80E-01 | 0.11  | 5.81E-01 |

|                |       |          |       |          |
|----------------|-------|----------|-------|----------|
| HOMER1         | 0.44  | 1.81E-02 | 0.11  | 5.81E-01 |
| HOXB1          | 0.06  | 7.60E-01 | 0.11  | 5.81E-01 |
| HOXC-AS3       | -0.21 | 2.81E-01 | -0.11 | 5.81E-01 |
| LELP1          | -0.13 | 5.17E-01 | 0.11  | 5.81E-01 |
| MARCKSL1P1     | 0.10  | 5.96E-01 | -0.11 | 5.81E-01 |
| MIR3941        | -0.33 | 9.04E-02 | 0.11  | 5.81E-01 |
| MYLK2          | -0.01 | 9.60E-01 | -0.11 | 5.81E-01 |
| NDFIP1P1       | -0.04 | 8.38E-01 | 0.11  | 5.81E-01 |
| NPIP5          | 0.13  | 5.06E-01 | -0.11 | 5.81E-01 |
| PARP6          | -0.02 | 9.33E-01 | 0.11  | 5.81E-01 |
| PLA2G4C        | -0.25 | 2.04E-01 | -0.11 | 5.81E-01 |
| PPP6R1         | 0.13  | 5.04E-01 | 0.11  | 5.81E-01 |
| RN7SL452P      | -0.05 | 7.83E-01 | -0.11 | 5.81E-01 |
| RP11-116O18.3  | 0.20  | 3.11E-01 | -0.11 | 5.81E-01 |
| RP11-144O23.22 | -0.01 | 9.49E-01 | -0.11 | 5.81E-01 |
| RP11-355O1.7   | -0.19 | 3.33E-01 | -0.11 | 5.81E-01 |
| RP11-85I21.1   | 0.02  | 9.15E-01 | 0.11  | 5.81E-01 |
| RP13-104F24.2  | 0.04  | 8.45E-01 | -0.11 | 5.81E-01 |
| RP4-740C4.5    | 0.09  | 6.40E-01 | 0.11  | 5.81E-01 |
| RPL3P6         | 0.31  | 1.09E-01 | 0.11  | 5.81E-01 |
| RPS3AP44       | -0.29 | 1.32E-01 | -0.11 | 5.81E-01 |
| SYS1           | -0.04 | 8.29E-01 | 0.11  | 5.81E-01 |
| TCEB3          | 0.29  | 1.37E-01 | -0.11 | 5.81E-01 |
| TCF12          | -0.13 | 5.19E-01 | -0.11 | 5.81E-01 |
| TMCC3          | -0.02 | 9.11E-01 | 0.11  | 5.81E-01 |
| TMEM246        | 0.28  | 1.53E-01 | -0.11 | 5.81E-01 |
| TNNI3          | -0.01 | 9.75E-01 | -0.11 | 5.81E-01 |
| TRPC6          | 0.02  | 9.15E-01 | -0.11 | 5.81E-01 |
| ZBTB44         | 0.07  | 7.27E-01 | -0.11 | 5.81E-01 |
| AC015815.6     | -0.09 | 6.59E-01 | 0.11  | 5.82E-01 |
| ADRM1          | 0.22  | 2.62E-01 | 0.11  | 5.82E-01 |
| CHERP          | 0.23  | 2.45E-01 | 0.11  | 5.82E-01 |
| CTD-2256P15.1  | 0.13  | 5.19E-01 | -0.11 | 5.82E-01 |
| CTD-2262B20.1  | -0.27 | 1.66E-01 | -0.11 | 5.82E-01 |
| FAM198B        | -0.09 | 6.43E-01 | 0.11  | 5.82E-01 |
| G36482         | -0.11 | 5.69E-01 | -0.11 | 5.82E-01 |
| GFPT2          | 0.19  | 3.42E-01 | 0.11  | 5.82E-01 |
| ISL1           | -0.10 | 6.19E-01 | 0.11  | 5.82E-01 |
| KRT28          | -0.14 | 4.72E-01 | 0.11  | 5.82E-01 |
| MMP21          | 0.25  | 1.98E-01 | -0.11 | 5.82E-01 |
| POU2F1         | 0.23  | 2.38E-01 | -0.11 | 5.82E-01 |
| RP1-164F3.8    | 0.04  | 8.26E-01 | -0.11 | 5.82E-01 |
| RP11-114F3.5   | 0.03  | 8.85E-01 | -0.11 | 5.82E-01 |
| RP11-291L19.1  | -0.15 | 4.34E-01 | -0.11 | 5.82E-01 |
| RP11-710E1.2   | -0.20 | 3.15E-01 | -0.11 | 5.82E-01 |
| RP11-94C24.8   | 0.20  | 3.09E-01 | 0.11  | 5.82E-01 |
| RP13-131K19.6  | -0.49 | 7.60E-03 | -0.11 | 5.82E-01 |

|               |       |          |       |          |
|---------------|-------|----------|-------|----------|
| RPL22L1       | 0.21  | 2.78E-01 | -0.11 | 5.82E-01 |
| SERTM1        | -0.09 | 6.37E-01 | -0.11 | 5.82E-01 |
| SMYD3-IT1     | 0.17  | 3.73E-01 | 0.11  | 5.82E-01 |
| SNORA4        | -0.09 | 6.55E-01 | -0.11 | 5.82E-01 |
| TEK           | -0.19 | 3.38E-01 | -0.11 | 5.82E-01 |
| WDFY1         | 0.21  | 2.83E-01 | -0.11 | 5.82E-01 |
| XLOC_006932   | 0.13  | 5.18E-01 | 0.11  | 5.82E-01 |
| ZFYVE9        | 0.12  | 5.45E-01 | -0.11 | 5.82E-01 |
| AC009303.1    | -0.17 | 3.92E-01 | -0.11 | 5.83E-01 |
| ACADVL        | 0.17  | 3.76E-01 | 0.11  | 5.83E-01 |
| BRWD1         | -0.02 | 9.20E-01 | -0.11 | 5.83E-01 |
| CMTM1         | 0.05  | 7.98E-01 | 0.11  | 5.83E-01 |
| COA3          | 0.15  | 4.35E-01 | 0.11  | 5.83E-01 |
| EPC2          | -0.10 | 6.17E-01 | 0.11  | 5.83E-01 |
| FARSA-AS1     | -0.13 | 5.10E-01 | 0.11  | 5.83E-01 |
| GCHFR         | 0.00  | 9.93E-01 | 0.11  | 5.83E-01 |
| IPO7          | 0.05  | 8.07E-01 | -0.11 | 5.83E-01 |
| ITGB1BP2      | -0.28 | 1.43E-01 | -0.11 | 5.83E-01 |
| KLRG2         | -0.13 | 4.98E-01 | -0.11 | 5.83E-01 |
| MTND1P11      | -0.01 | 9.54E-01 | -0.11 | 5.83E-01 |
| NMRK1         | -0.09 | 6.42E-01 | 0.11  | 5.83E-01 |
| PALM2         | 0.14  | 4.90E-01 | -0.11 | 5.83E-01 |
| PDGFRA        | -0.16 | 4.16E-01 | -0.11 | 5.83E-01 |
| REEP1         | 0.07  | 7.19E-01 | 0.11  | 5.83E-01 |
| RP11-135J2.3  | 0.19  | 3.23E-01 | -0.11 | 5.83E-01 |
| RP4-714D9.4   | -0.01 | 9.63E-01 | -0.11 | 5.83E-01 |
| RPL31P7       | 0.06  | 7.75E-01 | -0.11 | 5.83E-01 |
| SMU1          | 0.19  | 3.23E-01 | -0.11 | 5.83E-01 |
| XLOC_005254   | -0.03 | 8.71E-01 | -0.11 | 5.83E-01 |
| XLOC_007617   | 0.02  | 9.16E-01 | -0.11 | 5.83E-01 |
| AF001548.5    | 0.23  | 2.32E-01 | 0.11  | 5.84E-01 |
| G39784        | 0.30  | 1.18E-01 | 0.11  | 5.84E-01 |
| GDNF          | 0.05  | 7.83E-01 | 0.11  | 5.84E-01 |
| GRPEL2-AS1    | 0.06  | 7.63E-01 | 0.11  | 5.84E-01 |
| HRASLS5       | -0.21 | 2.77E-01 | 0.11  | 5.84E-01 |
| ISY1          | 0.19  | 3.24E-01 | 0.11  | 5.84E-01 |
| LA16c-429E7.1 | 0.04  | 8.46E-01 | 0.11  | 5.84E-01 |
| MIR645        | -0.07 | 7.41E-01 | 0.11  | 5.84E-01 |
| NIPAL3        | 0.20  | 3.15E-01 | 0.11  | 5.84E-01 |
| RBMX2P3       | -0.09 | 6.67E-01 | 0.11  | 5.84E-01 |
| RP11-15A1.9   | -0.06 | 7.66E-01 | 0.11  | 5.84E-01 |
| RP11-512N4.2  | -0.03 | 8.77E-01 | 0.11  | 5.84E-01 |
| RP11-540O11.4 | 0.07  | 7.39E-01 | 0.11  | 5.84E-01 |
| RP5-1039K5.12 | 0.16  | 4.11E-01 | 0.11  | 5.84E-01 |
| RPS27P16      | -0.25 | 1.92E-01 | 0.11  | 5.84E-01 |
| CPEB2         | -0.05 | 8.16E-01 | -0.11 | 5.84E-01 |
| IFNLR1        | 0.14  | 4.73E-01 | -0.11 | 5.84E-01 |

|               |       |          |       |          |
|---------------|-------|----------|-------|----------|
| LA16c-OS12.2  | 0.00  | 9.80E-01 | -0.11 | 5.84E-01 |
| MARK2P17      | 0.06  | 7.62E-01 | -0.11 | 5.84E-01 |
| PCDHGC4       | 0.05  | 8.12E-01 | -0.11 | 5.84E-01 |
| PQLC2L        | -0.60 | 8.17E-04 | -0.11 | 5.84E-01 |
| RNU7-109P     | 0.10  | 6.11E-01 | -0.11 | 5.84E-01 |
| RP11-165N19.2 | -0.10 | 6.02E-01 | -0.11 | 5.84E-01 |
| RP11-2H8.4    | -0.01 | 9.79E-01 | -0.11 | 5.84E-01 |
| RP11-648L3.2  | -0.31 | 1.07E-01 | -0.11 | 5.84E-01 |
| SNAP25        | 0.09  | 6.66E-01 | -0.11 | 5.84E-01 |
| ADRBK1        | 0.25  | 1.93E-01 | 0.11  | 5.85E-01 |
| ATG14         | -0.26 | 1.80E-01 | -0.11 | 5.85E-01 |
| BTBD10P2      | 0.17  | 3.75E-01 | -0.11 | 5.85E-01 |
| BTLA          | 0.08  | 6.86E-01 | 0.11  | 5.85E-01 |
| C1QBP         | 0.06  | 7.53E-01 | -0.11 | 5.85E-01 |
| CASC2         | -0.06 | 7.55E-01 | -0.11 | 5.85E-01 |
| CD300LF       | 0.03  | 8.83E-01 | -0.11 | 5.85E-01 |
| CDKN2B-AS1    | -0.24 | 2.20E-01 | 0.11  | 5.85E-01 |
| CPA3          | 0.13  | 5.15E-01 | 0.11  | 5.85E-01 |
| CPSF4L        | -0.23 | 2.29E-01 | -0.11 | 5.85E-01 |
| CTC-529P8.1   | -0.04 | 8.54E-01 | -0.11 | 5.85E-01 |
| DNMT3A        | -0.02 | 9.23E-01 | 0.11  | 5.85E-01 |
| EIF2AK1       | 0.00  | 9.87E-01 | 0.11  | 5.85E-01 |
| EXOSC4        | 0.10  | 6.20E-01 | 0.11  | 5.85E-01 |
| FAT4          | -0.27 | 1.67E-01 | 0.11  | 5.85E-01 |
| G38514        | 0.16  | 4.19E-01 | -0.11 | 5.85E-01 |
| HSF2BP        | 0.19  | 3.29E-01 | -0.11 | 5.85E-01 |
| HTR4          | -0.03 | 8.63E-01 | 0.11  | 5.85E-01 |
| KATNB1        | 0.27  | 1.70E-01 | 0.11  | 5.85E-01 |
| KCNK1         | -0.10 | 6.13E-01 | -0.11 | 5.85E-01 |
| KLHL6         | 0.39  | 4.04E-02 | 0.11  | 5.85E-01 |
| LINC00472     | -0.03 | 8.80E-01 | -0.11 | 5.85E-01 |
| LINC00887     | -0.18 | 3.57E-01 | 0.11  | 5.85E-01 |
| LMTK2         | 0.16  | 4.13E-01 | 0.11  | 5.85E-01 |
| MBD3          | 0.19  | 3.29E-01 | 0.11  | 5.85E-01 |
| MCF2L2        | -0.10 | 6.18E-01 | -0.11 | 5.85E-01 |
| PTPN12        | -0.02 | 9.39E-01 | -0.11 | 5.85E-01 |
| RNU6-583P     | 0.08  | 7.03E-01 | -0.11 | 5.85E-01 |
| RP11-435O5.7  | -0.13 | 4.96E-01 | 0.11  | 5.85E-01 |
| RP11-588H23.3 | -0.10 | 6.07E-01 | -0.11 | 5.85E-01 |
| RP11-775J23.2 | -0.01 | 9.58E-01 | 0.11  | 5.85E-01 |
| RP11-7M10.2   | 0.24  | 2.19E-01 | 0.11  | 5.85E-01 |
| RPUSD4        | -0.06 | 7.43E-01 | 0.11  | 5.85E-01 |
| ABHD17A       | 0.11  | 5.60E-01 | 0.11  | 5.86E-01 |
| ANKZF1        | -0.14 | 4.73E-01 | 0.11  | 5.86E-01 |
| ARHGAP31      | -0.06 | 7.52E-01 | 0.11  | 5.86E-01 |
| ATRAID        | -0.02 | 9.26E-01 | 0.11  | 5.86E-01 |
| GADL1         | -0.05 | 7.89E-01 | 0.11  | 5.86E-01 |

|                      |       |          |       |          |
|----------------------|-------|----------|-------|----------|
| <b>GATA2-AS1</b>     | 0.30  | 1.25E-01 | 0.11  | 5.86E-01 |
| <b>HMGN1P7</b>       | -0.35 | 6.77E-02 | 0.11  | 5.86E-01 |
| <b>HNRNPA1P59</b>    | -0.14 | 4.77E-01 | 0.11  | 5.86E-01 |
| <b>HOXC11</b>        | 0.07  | 7.10E-01 | 0.11  | 5.86E-01 |
| <b>LY9</b>           | 0.25  | 2.00E-01 | 0.11  | 5.86E-01 |
| <b>MREG</b>          | 0.16  | 4.22E-01 | 0.11  | 5.86E-01 |
| <b>NFX1</b>          | -0.01 | 9.58E-01 | 0.11  | 5.86E-01 |
| <b>RNU6-883P</b>     | 0.11  | 5.71E-01 | 0.11  | 5.86E-01 |
| <b>RP11-620J15.1</b> | -0.15 | 4.39E-01 | 0.11  | 5.86E-01 |
| <b>UBLCP1</b>        | 0.37  | 5.40E-02 | 0.11  | 5.86E-01 |
| <b>ZNF337-AS1</b>    | -0.03 | 8.98E-01 | 0.11  | 5.86E-01 |
| <b>ANKRD22</b>       | 0.25  | 2.07E-01 | -0.11 | 5.86E-01 |
| <b>C9orf24</b>       | -0.29 | 1.37E-01 | -0.11 | 5.86E-01 |
| <b>CHKB</b>          | -0.13 | 5.03E-01 | -0.11 | 5.86E-01 |
| <b>FLJ12825</b>      | 0.08  | 7.03E-01 | -0.11 | 5.86E-01 |
| <b>G19302</b>        | -0.02 | 9.29E-01 | -0.11 | 5.86E-01 |
| <b>GALC</b>          | 0.20  | 3.00E-01 | -0.11 | 5.86E-01 |
| <b>GGA3</b>          | -0.06 | 7.45E-01 | -0.11 | 5.86E-01 |
| <b>KCTD13</b>        | 0.16  | 4.16E-01 | -0.11 | 5.86E-01 |
| <b>LIME1</b>         | 0.09  | 6.48E-01 | -0.11 | 5.86E-01 |
| <b>LINC00470</b>     | -0.14 | 4.65E-01 | -0.11 | 5.86E-01 |
| <b>PLPPR3</b>        | -0.08 | 6.74E-01 | -0.11 | 5.86E-01 |
| <b>RAD23B</b>        | -0.02 | 9.38E-01 | -0.11 | 5.86E-01 |
| <b>RNU6-588P</b>     | 0.03  | 8.88E-01 | -0.11 | 5.86E-01 |
| <b>RP11-45A16.4</b>  | -0.11 | 5.68E-01 | -0.11 | 5.86E-01 |
| <b>RP11-572P18.1</b> | 0.20  | 3.10E-01 | -0.11 | 5.86E-01 |
| <b>SLC25A33</b>      | 0.21  | 2.76E-01 | -0.11 | 5.86E-01 |
| <b>SLFNL1-AS1</b>    | 0.03  | 8.93E-01 | -0.11 | 5.86E-01 |
| <b>TAPT1</b>         | 0.00  | 9.80E-01 | -0.11 | 5.86E-01 |
| <b>TRPC2</b>         | -0.09 | 6.49E-01 | -0.11 | 5.86E-01 |
| <b>XLOC_006311</b>   | -0.02 | 9.27E-01 | -0.11 | 5.86E-01 |
| <b>ABO</b>           | -0.59 | 8.40E-04 | 0.11  | 5.87E-01 |
| <b>AC007773.2</b>    | 0.42  | 2.45E-02 | 0.11  | 5.87E-01 |
| <b>AC009518.8</b>    | -0.24 | 2.20E-01 | 0.11  | 5.87E-01 |
| <b>AC092687.3</b>    | 0.10  | 6.30E-01 | -0.11 | 5.87E-01 |
| <b>ANXA8</b>         | 0.13  | 5.09E-01 | -0.11 | 5.87E-01 |
| <b>AP001925.1</b>    | -0.13 | 5.11E-01 | 0.11  | 5.87E-01 |
| <b>CAMP</b>          | 0.11  | 5.82E-01 | 0.11  | 5.87E-01 |
| <b>CMIP</b>          | 0.19  | 3.33E-01 | 0.11  | 5.87E-01 |
| <b>DMC1</b>          | -0.25 | 1.92E-01 | 0.11  | 5.87E-01 |
| <b>ELK3</b>          | 0.26  | 1.82E-01 | 0.11  | 5.87E-01 |
| <b>ENO1</b>          | 0.00  | 9.96E-01 | 0.11  | 5.87E-01 |
| <b>ERC1</b>          | -0.26 | 1.89E-01 | 0.11  | 5.87E-01 |
| <b>GS1-57L11.1</b>   | 0.07  | 7.25E-01 | -0.11 | 5.87E-01 |
| <b>LA16c-329F2.1</b> | -0.17 | 3.96E-01 | 0.11  | 5.87E-01 |
| <b>MYB-AS1</b>       | -0.24 | 2.14E-01 | -0.11 | 5.87E-01 |
| <b>MYOZ3</b>         | 0.14  | 4.79E-01 | 0.11  | 5.87E-01 |

|                 |       |          |       |          |
|-----------------|-------|----------|-------|----------|
| NDUFA1          | 0.15  | 4.47E-01 | 0.11  | 5.87E-01 |
| NME5            | -0.13 | 4.97E-01 | -0.11 | 5.87E-01 |
| OPTC            | -0.03 | 8.92E-01 | -0.11 | 5.87E-01 |
| OR52W1          | -0.16 | 4.18E-01 | 0.11  | 5.87E-01 |
| PDS5A           | 0.11  | 5.70E-01 | -0.11 | 5.87E-01 |
| PPP1R2          | 0.29  | 1.28E-01 | 0.11  | 5.87E-01 |
| PRDX4           | 0.18  | 3.63E-01 | -0.11 | 5.87E-01 |
| PRKDC           | -0.05 | 8.13E-01 | -0.11 | 5.87E-01 |
| PTCHD3          | 0.21  | 2.89E-01 | 0.11  | 5.87E-01 |
| RP11-388K2.1    | -0.02 | 9.31E-01 | 0.11  | 5.87E-01 |
| RP11-93I21.3    | -0.21 | 2.88E-01 | -0.11 | 5.87E-01 |
| SIRPG-AS1       | -0.36 | 6.24E-02 | 0.11  | 5.87E-01 |
| SMN1            | 0.19  | 3.30E-01 | -0.11 | 5.87E-01 |
| TMEM158         | 0.23  | 2.33E-01 | -0.11 | 5.87E-01 |
| TMEM238         | 0.02  | 9.21E-01 | 0.11  | 5.87E-01 |
| VPS13B          | -0.18 | 3.66E-01 | -0.11 | 5.87E-01 |
| ZBTB34          | -0.26 | 1.75E-01 | 0.11  | 5.87E-01 |
| ZMIZ1-AS1       | 0.04  | 8.53E-01 | -0.11 | 5.87E-01 |
| ZNF689          | 0.10  | 6.31E-01 | -0.11 | 5.87E-01 |
| A2ML1-AS1       | 0.30  | 1.26E-01 | 0.11  | 5.88E-01 |
| ABCA17P         | 0.36  | 5.64E-02 | 0.11  | 5.88E-01 |
| AC005562.1      | 0.25  | 1.93E-01 | -0.11 | 5.88E-01 |
| AC009005.2      | -0.09 | 6.65E-01 | 0.11  | 5.88E-01 |
| ADPGK           | 0.00  | 9.82E-01 | -0.11 | 5.88E-01 |
| C2orf70         | -0.07 | 7.24E-01 | -0.11 | 5.88E-01 |
| CCNA1           | -0.04 | 8.50E-01 | -0.11 | 5.88E-01 |
| COX6A1          | 0.11  | 5.80E-01 | 0.11  | 5.88E-01 |
| DNAJC1          | -0.13 | 5.21E-01 | -0.11 | 5.88E-01 |
| EAPP            | 0.16  | 4.16E-01 | 0.11  | 5.88E-01 |
| FAM133DP        | -0.30 | 1.22E-01 | -0.11 | 5.88E-01 |
| GPR18           | 0.13  | 5.15E-01 | -0.11 | 5.88E-01 |
| HEPH            | -0.18 | 3.69E-01 | -0.11 | 5.88E-01 |
| INTS2           | 0.22  | 2.63E-01 | -0.11 | 5.88E-01 |
| LRP4-AS1        | -0.15 | 4.49E-01 | 0.11  | 5.88E-01 |
| MIR3973         | -0.21 | 2.89E-01 | -0.11 | 5.88E-01 |
| NHEG1           | -0.06 | 7.70E-01 | -0.11 | 5.88E-01 |
| RNU6-531P       | 0.12  | 5.55E-01 | -0.11 | 5.88E-01 |
| RNU6-960P       | 0.18  | 3.69E-01 | -0.11 | 5.88E-01 |
| RP11-159N11.4   | -0.04 | 8.57E-01 | -0.11 | 5.88E-01 |
| RP11-873E20.1   | 0.04  | 8.50E-01 | 0.11  | 5.88E-01 |
| RP11-890B15.3   | -0.08 | 6.72E-01 | -0.11 | 5.88E-01 |
| SERINC1         | -0.13 | 5.00E-01 | -0.11 | 5.88E-01 |
| SLC5A1          | 0.00  | 9.96E-01 | 0.11  | 5.88E-01 |
| SNHG19          | 0.07  | 7.09E-01 | 0.11  | 5.88E-01 |
| G3L5P-PVRIG2P-P | 0.02  | 9.39E-01 | 0.11  | 5.88E-01 |
| STAP1           | 0.21  | 2.87E-01 | 0.11  | 5.88E-01 |
| TBX1            | 0.06  | 7.59E-01 | -0.11 | 5.88E-01 |

|                |       |          |       |          |
|----------------|-------|----------|-------|----------|
| TRA2A          | -0.11 | 5.69E-01 | 0.11  | 5.88E-01 |
| TSPAN7         | -0.06 | 7.64E-01 | -0.11 | 5.88E-01 |
| XLOC_003397    | -0.08 | 7.02E-01 | -0.11 | 5.88E-01 |
| ZPLD1          | 0.15  | 4.55E-01 | 0.11  | 5.88E-01 |
| AC090427.1     | 0.07  | 7.30E-01 | -0.11 | 5.89E-01 |
| AC092484.1     | -0.04 | 8.29E-01 | -0.11 | 5.89E-01 |
| ACTR3BP4       | 0.00  | 9.98E-01 | 0.11  | 5.89E-01 |
| ATXN7L3B       | 0.10  | 6.31E-01 | -0.11 | 5.89E-01 |
| CAMTA2         | 0.00  | 9.88E-01 | 0.11  | 5.89E-01 |
| CTD-2231E14.5  | -0.41 | 2.98E-02 | 0.11  | 5.89E-01 |
| CTSF           | -0.24 | 2.11E-01 | -0.11 | 5.89E-01 |
| CYP2R1         | -0.06 | 7.63E-01 | -0.11 | 5.89E-01 |
| GAPDHP1        | 0.20  | 3.04E-01 | 0.11  | 5.89E-01 |
| GLRA1          | -0.10 | 6.14E-01 | -0.11 | 5.89E-01 |
| GPD2           | -0.23 | 2.32E-01 | -0.11 | 5.89E-01 |
| HMG2P38        | 0.03  | 8.82E-01 | 0.11  | 5.89E-01 |
| HSPA9          | 0.16  | 4.13E-01 | -0.11 | 5.89E-01 |
| INVS           | -0.18 | 3.71E-01 | 0.11  | 5.89E-01 |
| KLRB1          | 0.29  | 1.39E-01 | -0.11 | 5.89E-01 |
| LINC01004      | 0.06  | 7.61E-01 | -0.11 | 5.89E-01 |
| PCDHA6         | -0.13 | 5.09E-01 | -0.11 | 5.89E-01 |
| PCNPP1         | 0.16  | 4.04E-01 | 0.11  | 5.89E-01 |
| PCOLCE-AS1     | -0.17 | 3.78E-01 | 0.11  | 5.89E-01 |
| PTGES          | 0.07  | 7.32E-01 | 0.11  | 5.89E-01 |
| RP1-124C6.1    | 0.01  | 9.47E-01 | -0.11 | 5.89E-01 |
| RP11-44F14.10  | 0.01  | 9.78E-01 | -0.11 | 5.89E-01 |
| RP11-47L3.1    | -0.18 | 3.58E-01 | 0.11  | 5.89E-01 |
| RP11-539I5.1   | -0.23 | 2.43E-01 | 0.11  | 5.89E-01 |
| RP11-815J4.6   | -0.04 | 8.57E-01 | 0.11  | 5.89E-01 |
| TPST1          | 0.20  | 3.14E-01 | 0.11  | 5.89E-01 |
| ZNF541         | -0.06 | 7.60E-01 | 0.11  | 5.89E-01 |
| AC069513.4     | 0.07  | 7.37E-01 | 0.11  | 5.90E-01 |
| CERS1          | -0.24 | 2.15E-01 | 0.11  | 5.90E-01 |
| EEF1A1P25      | -0.23 | 2.32E-01 | 0.11  | 5.90E-01 |
| FLJ16779       | 0.05  | 7.96E-01 | 0.11  | 5.90E-01 |
| G36840         | -0.05 | 7.89E-01 | 0.11  | 5.90E-01 |
| GADD45GIP1     | 0.09  | 6.44E-01 | 0.11  | 5.90E-01 |
| HOXB-AS3       | 0.05  | 7.87E-01 | 0.11  | 5.90E-01 |
| KRTAP3-3       | -0.09 | 6.49E-01 | 0.11  | 5.90E-01 |
| LYZ            | 0.22  | 2.57E-01 | 0.11  | 5.90E-01 |
| NPIP3          | -0.28 | 1.56E-01 | 0.11  | 5.90E-01 |
| RP11-1348G14.1 | -0.19 | 3.44E-01 | 0.11  | 5.90E-01 |
| RP11-141M1.3   | -0.01 | 9.45E-01 | 0.11  | 5.90E-01 |
| RP11-380I10.2  | -0.12 | 5.42E-01 | 0.11  | 5.90E-01 |
| RP11-6N17.3    | -0.31 | 1.10E-01 | 0.11  | 5.90E-01 |
| RPS10P14       | -0.42 | 2.47E-02 | 0.11  | 5.90E-01 |
| RPS16          | 0.07  | 7.09E-01 | 0.11  | 5.90E-01 |



|                      |       |          |       |          |
|----------------------|-------|----------|-------|----------|
| <b>SSUH2</b>         | -0.03 | 8.87E-01 | 0.11  | 5.90E-01 |
| <b>AC010967.2</b>    | -0.23 | 2.39E-01 | -0.11 | 5.90E-01 |
| <b>AC073052.1</b>    | 0.03  | 8.64E-01 | -0.11 | 5.90E-01 |
| <b>B3GALT6</b>       | 0.23  | 2.40E-01 | -0.11 | 5.90E-01 |
| <b>C1orf131</b>      | 0.22  | 2.60E-01 | -0.11 | 5.90E-01 |
| <b>C2orf66</b>       | -0.14 | 4.65E-01 | -0.11 | 5.90E-01 |
| <b>CC2D2B</b>        | -0.25 | 2.06E-01 | -0.11 | 5.90E-01 |
| <b>EFNB3</b>         | 0.27  | 1.73E-01 | -0.11 | 5.90E-01 |
| <b>EPHB1</b>         | 0.12  | 5.51E-01 | -0.11 | 5.90E-01 |
| <b>EXTL3-AS1</b>     | 0.11  | 5.85E-01 | -0.11 | 5.90E-01 |
| <b>G40027</b>        | -0.02 | 9.05E-01 | -0.11 | 5.90E-01 |
| <b>GGPS1</b>         | 0.01  | 9.50E-01 | -0.11 | 5.90E-01 |
| <b>KLF2</b>          | -0.40 | 3.73E-02 | -0.11 | 5.90E-01 |
| <b>LRRC27</b>        | 0.13  | 5.23E-01 | -0.11 | 5.90E-01 |
| <b>PCDHB3</b>        | 0.10  | 5.95E-01 | -0.11 | 5.90E-01 |
| <b>RP11-187C18.3</b> | 0.02  | 9.39E-01 | -0.11 | 5.90E-01 |
| <b>RP11-298D21.3</b> | 0.02  | 9.33E-01 | -0.11 | 5.90E-01 |
| <b>RP11-6J24.3</b>   | 0.22  | 2.59E-01 | -0.11 | 5.90E-01 |
| <b>RP4-681L3.2</b>   | 0.33  | 8.18E-02 | -0.11 | 5.90E-01 |
| <b>SLC5A11</b>       | -0.01 | 9.74E-01 | -0.11 | 5.90E-01 |
| <b>SNORD103B</b>     | -0.10 | 6.29E-01 | -0.11 | 5.90E-01 |
| <b>SOX9</b>          | 0.24  | 2.11E-01 | -0.11 | 5.90E-01 |
| <b>STK17A</b>        | 0.15  | 4.37E-01 | -0.11 | 5.90E-01 |
| <b>TRAJ20</b>        | 0.05  | 8.12E-01 | -0.11 | 5.90E-01 |
| <b>VWA3A</b>         | -0.15 | 4.51E-01 | -0.11 | 5.90E-01 |
| <b>AC064852.4</b>    | -0.08 | 6.98E-01 | 0.11  | 5.91E-01 |
| <b>AC093690.1</b>    | 0.21  | 2.83E-01 | 0.11  | 5.91E-01 |
| <b>CDC42SE2</b>      | 0.21  | 2.77E-01 | 0.11  | 5.91E-01 |
| <b>CRTAP</b>         | -0.09 | 6.66E-01 | 0.11  | 5.91E-01 |
| <b>EXOC2</b>         | 0.10  | 6.03E-01 | 0.11  | 5.91E-01 |
| <b>HMBOX1-IT1</b>    | -0.25 | 1.94E-01 | 0.11  | 5.91E-01 |
| <b>HMG2P46</b>       | -0.28 | 1.48E-01 | 0.11  | 5.91E-01 |
| <b>HNRNPUL2</b>      | -0.04 | 8.25E-01 | 0.11  | 5.91E-01 |
| <b>IFT22</b>         | -0.09 | 6.66E-01 | 0.11  | 5.91E-01 |
| <b>KCNK5</b>         | 0.26  | 1.74E-01 | 0.11  | 5.91E-01 |
| <b>RASSF2</b>        | 0.28  | 1.45E-01 | 0.11  | 5.91E-01 |
| <b>RBM41</b>         | 0.02  | 9.36E-01 | 0.11  | 5.91E-01 |
| <b>RN7SL788P</b>     | -0.13 | 5.11E-01 | 0.11  | 5.91E-01 |
| <b>RP11-30J20.1</b>  | 0.19  | 3.43E-01 | 0.11  | 5.91E-01 |
| <b>RP11-326I19.2</b> | 0.11  | 5.78E-01 | 0.11  | 5.91E-01 |
| <b>RP11-575A19.2</b> | 0.18  | 3.66E-01 | 0.11  | 5.91E-01 |
| <b>AC011247.3</b>    | -0.11 | 5.72E-01 | -0.11 | 5.91E-01 |
| <b>AP001462.6</b>    | -0.15 | 4.56E-01 | -0.11 | 5.91E-01 |
| <b>ARHGEF9</b>       | 0.25  | 2.02E-01 | -0.11 | 5.91E-01 |
| <b>ARL4AP1</b>       | 0.11  | 5.85E-01 | -0.11 | 5.91E-01 |
| <b>CHRNA1</b>        | 0.14  | 4.92E-01 | -0.11 | 5.91E-01 |
| <b>CRTC3</b>         | 0.03  | 8.85E-01 | -0.11 | 5.91E-01 |

|                |       |          |       |          |
|----------------|-------|----------|-------|----------|
| HMG2           | 0.04  | 8.41E-01 | -0.11 | 5.91E-01 |
| LDB2           | -0.05 | 8.19E-01 | -0.11 | 5.91E-01 |
| LINC00113      | 0.24  | 2.26E-01 | -0.11 | 5.91E-01 |
| PAFAH1B2       | 0.15  | 4.56E-01 | -0.11 | 5.91E-01 |
| PAICS          | 0.06  | 7.59E-01 | -0.11 | 5.91E-01 |
| RP11-1074O12.1 | -0.13 | 4.98E-01 | -0.11 | 5.91E-01 |
| RP11-17G12.2   | 0.16  | 4.16E-01 | -0.11 | 5.91E-01 |
| RP11-264B17.2  | -0.06 | 7.71E-01 | -0.11 | 5.91E-01 |
| RP11-493P1.2   | 0.14  | 4.78E-01 | -0.11 | 5.91E-01 |
| RP11-68I3.4    | -0.13 | 5.18E-01 | -0.11 | 5.91E-01 |
| RP4-583P15.16  | 0.21  | 2.82E-01 | -0.11 | 5.91E-01 |
| SEMA3E         | -0.11 | 5.66E-01 | -0.11 | 5.91E-01 |
| SIAH3          | -0.50 | 6.34E-03 | -0.11 | 5.91E-01 |
| TRIM72         | 0.00  | 9.94E-01 | -0.11 | 5.91E-01 |
| VIM            | -0.24 | 2.17E-01 | -0.11 | 5.91E-01 |
| ZNF174         | 0.14  | 4.77E-01 | -0.11 | 5.91E-01 |
| AC090571.1     | -0.32 | 1.01E-01 | 0.11  | 5.92E-01 |
| AC093166.4     | -0.32 | 9.42E-02 | -0.11 | 5.92E-01 |
| AC104438.1     | -0.15 | 4.60E-01 | 0.11  | 5.92E-01 |
| ALYREF         | -0.03 | 8.86E-01 | -0.11 | 5.92E-01 |
| AP000356.1     | 0.18  | 3.59E-01 | -0.11 | 5.92E-01 |
| ASCL4          | 0.00  | 9.82E-01 | -0.11 | 5.92E-01 |
| C10orf25       | 0.22  | 2.62E-01 | 0.11  | 5.92E-01 |
| CAP2           | -0.10 | 6.30E-01 | 0.11  | 5.92E-01 |
| DLG4           | -0.17 | 3.76E-01 | 0.11  | 5.92E-01 |
| EEF1A1P6       | -0.20 | 3.05E-01 | 0.11  | 5.92E-01 |
| EFEMP1         | -0.20 | 3.05E-01 | -0.11 | 5.92E-01 |
| FAM178B        | -0.23 | 2.34E-01 | -0.11 | 5.92E-01 |
| FRMD6          | 0.14  | 4.75E-01 | 0.11  | 5.92E-01 |
| GABRE          | 0.08  | 6.73E-01 | -0.11 | 5.92E-01 |
| HSPA8P3        | -0.05 | 8.03E-01 | 0.11  | 5.92E-01 |
| LCE1C          | 0.01  | 9.55E-01 | 0.11  | 5.92E-01 |
| MAMDC2         | -0.39 | 4.00E-02 | 0.11  | 5.92E-01 |
| MED12          | -0.18 | 3.47E-01 | 0.11  | 5.92E-01 |
| MGA            | 0.03  | 8.98E-01 | 0.11  | 5.92E-01 |
| MIR3142HG      | 0.37  | 5.08E-02 | 0.11  | 5.92E-01 |
| PRRT2          | -0.03 | 8.92E-01 | 0.11  | 5.92E-01 |
| RP11-251G23.2  | -0.06 | 7.67E-01 | 0.11  | 5.92E-01 |
| RP11-395I14.2  | -0.20 | 3.02E-01 | 0.11  | 5.92E-01 |
| RP11-96C23.10  | -0.05 | 7.94E-01 | 0.11  | 5.92E-01 |
| RP3-509L4.3    | -0.12 | 5.50E-01 | -0.11 | 5.92E-01 |
| RPE            | -0.03 | 8.70E-01 | -0.11 | 5.92E-01 |
| RPL13A         | 0.21  | 2.75E-01 | 0.11  | 5.92E-01 |
| RPL13AP20      | 0.07  | 7.32E-01 | 0.11  | 5.92E-01 |
| RPL23AP35      | -0.11 | 5.60E-01 | 0.11  | 5.92E-01 |
| SATB1-AS1      | 0.38  | 4.85E-02 | 0.11  | 5.92E-01 |
| SMG8           | 0.17  | 4.01E-01 | -0.11 | 5.92E-01 |

|                      |       |          |       |          |
|----------------------|-------|----------|-------|----------|
| <b>SOGA1</b>         | -0.04 | 8.45E-01 | 0.11  | 5.92E-01 |
| <b>SPSB1</b>         | -0.18 | 3.54E-01 | 0.11  | 5.92E-01 |
| <b>TAS2R63P</b>      | -0.07 | 7.31E-01 | -0.11 | 5.92E-01 |
| <b>WDR19</b>         | -0.29 | 1.32E-01 | -0.11 | 5.92E-01 |
| <b>ZNF112</b>        | -0.07 | 7.12E-01 | -0.11 | 5.92E-01 |
| <b>ZNF398</b>        | 0.16  | 4.05E-01 | 0.11  | 5.92E-01 |
| <b>ADAMTS13</b>      | 0.17  | 3.90E-01 | 0.11  | 5.93E-01 |
| <b>CASC4</b>         | -0.03 | 8.91E-01 | 0.11  | 5.93E-01 |
| <b>CDC20</b>         | 0.08  | 6.81E-01 | 0.11  | 5.93E-01 |
| <b>CTB-50L17.14</b>  | 0.24  | 2.11E-01 | 0.11  | 5.93E-01 |
| <b>DDRGK1</b>        | 0.10  | 6.20E-01 | 0.11  | 5.93E-01 |
| <b>GNA15</b>         | 0.30  | 1.19E-01 | 0.11  | 5.93E-01 |
| <b>LINC01137</b>     | 0.09  | 6.53E-01 | 0.11  | 5.93E-01 |
| <b>OSCP1</b>         | -0.23 | 2.46E-01 | 0.11  | 5.93E-01 |
| <b>PHLDB2</b>        | 0.04  | 8.56E-01 | 0.11  | 5.93E-01 |
| <b>PINX1</b>         | 0.28  | 1.42E-01 | 0.11  | 5.93E-01 |
| <b>PREP</b>          | 0.27  | 1.65E-01 | 0.11  | 5.93E-01 |
| <b>RP1-101K10.6</b>  | -0.16 | 4.24E-01 | 0.11  | 5.93E-01 |
| <b>SLC2A1-AS1</b>    | 0.14  | 4.79E-01 | 0.11  | 5.93E-01 |
| <b>TIMM8AP1</b>      | -0.33 | 8.59E-02 | 0.11  | 5.93E-01 |
| <b>TRIM3</b>         | -0.21 | 2.93E-01 | 0.11  | 5.93E-01 |
| <b>ZFAND2A</b>       | -0.22 | 2.66E-01 | 0.11  | 5.93E-01 |
| <b>AC007271.3</b>    | -0.06 | 7.46E-01 | -0.11 | 5.93E-01 |
| <b>CCNB2P1</b>       | -0.18 | 3.57E-01 | -0.11 | 5.93E-01 |
| <b>CNOT10</b>        | -0.03 | 8.80E-01 | -0.11 | 5.93E-01 |
| <b>CPNE6</b>         | 0.36  | 5.64E-02 | -0.11 | 5.93E-01 |
| <b>CSMD1</b>         | -0.13 | 5.09E-01 | -0.11 | 5.93E-01 |
| <b>GLT1D1</b>        | 0.32  | 1.01E-01 | -0.11 | 5.93E-01 |
| <b>IQGAP1</b>        | -0.23 | 2.45E-01 | -0.11 | 5.93E-01 |
| <b>LRP1-AS</b>       | 0.06  | 7.67E-01 | -0.11 | 5.93E-01 |
| <b>MUC12</b>         | -0.10 | 6.04E-01 | -0.11 | 5.93E-01 |
| <b>RNF139</b>        | 0.09  | 6.39E-01 | -0.11 | 5.93E-01 |
| <b>RP11-154H23.3</b> | -0.02 | 9.32E-01 | -0.11 | 5.93E-01 |
| <b>RP11-179A7.2</b>  | -0.14 | 4.77E-01 | -0.11 | 5.93E-01 |
| <b>RP11-227D13.4</b> | 0.15  | 4.50E-01 | -0.11 | 5.93E-01 |
| <b>RP11-25B7.1</b>   | 0.11  | 5.81E-01 | -0.11 | 5.93E-01 |
| <b>RP11-331F4.5</b>  | 0.09  | 6.36E-01 | -0.11 | 5.93E-01 |
| <b>RP11-596C23.2</b> | 0.20  | 3.13E-01 | -0.11 | 5.93E-01 |
| <b>RP11-756P10.3</b> | 0.23  | 2.35E-01 | -0.11 | 5.93E-01 |
| <b>SNRK-AS1</b>      | 0.08  | 6.93E-01 | -0.11 | 5.93E-01 |
| <b>TCTEX1D4</b>      | -0.14 | 4.63E-01 | -0.11 | 5.93E-01 |
| <b>TM4SF1</b>        | 0.08  | 6.85E-01 | -0.11 | 5.93E-01 |
| <b>ACVR2B-AS1</b>    | -0.14 | 4.80E-01 | -0.11 | 5.95E-01 |
| <b>AP001619.2</b>    | 0.13  | 4.93E-01 | 0.11  | 5.95E-01 |
| <b>ATP5L2</b>        | -0.09 | 6.59E-01 | -0.11 | 5.95E-01 |
| <b>AZIN2</b>         | 0.20  | 3.02E-01 | 0.11  | 5.95E-01 |
| <b>BBS10</b>         | -0.05 | 8.17E-01 | 0.11  | 5.95E-01 |

|                       |       |          |       |          |
|-----------------------|-------|----------|-------|----------|
| <b>CTC-277H1.7</b>    | -0.17 | 4.00E-01 | -0.11 | 5.95E-01 |
| <b>DEK</b>            | -0.02 | 9.27E-01 | -0.11 | 5.95E-01 |
| <b>G19311</b>         | -0.35 | 6.91E-02 | 0.11  | 5.95E-01 |
| <b>HIST1H2BH</b>      | 0.03  | 8.83E-01 | 0.11  | 5.95E-01 |
| <b>IL17B</b>          | 0.17  | 3.93E-01 | -0.11 | 5.95E-01 |
| <b>MEGF9</b>          | -0.11 | 5.71E-01 | -0.11 | 5.95E-01 |
| <b>MTND5P1</b>        | -0.28 | 1.42E-01 | -0.11 | 5.95E-01 |
| <b>MVB12A</b>         | 0.19  | 3.21E-01 | 0.11  | 5.95E-01 |
| <b>NDUFA3P1</b>       | -0.11 | 5.76E-01 | 0.11  | 5.95E-01 |
| <b>NR6A1</b>          | -0.12 | 5.45E-01 | -0.11 | 5.95E-01 |
| <b>OIT3</b>           | 0.05  | 8.16E-01 | 0.11  | 5.95E-01 |
| <b>POU4F1</b>         | -0.01 | 9.65E-01 | 0.11  | 5.95E-01 |
| <b>PTAFR</b>          | 0.21  | 2.91E-01 | 0.11  | 5.95E-01 |
| <b>RASL12</b>         | 0.11  | 5.88E-01 | 0.11  | 5.95E-01 |
| <b>RNU2-69P</b>       | -0.03 | 8.88E-01 | 0.11  | 5.95E-01 |
| <b>RP11-141O11.2</b>  | -0.18 | 3.57E-01 | -0.11 | 5.95E-01 |
| <b>RP11-195C7.3</b>   | 0.12  | 5.37E-01 | -0.11 | 5.95E-01 |
| <b>RP11-211N8.6</b>   | -0.20 | 2.97E-01 | -0.11 | 5.95E-01 |
| <b>RP11-661A12.12</b> | -0.03 | 8.82E-01 | 0.11  | 5.95E-01 |
| <b>RP11-678G15.1</b>  | -0.06 | 7.44E-01 | -0.11 | 5.95E-01 |
| <b>RP13-487P22.1</b>  | 0.06  | 7.55E-01 | -0.11 | 5.95E-01 |
| <b>RPS15AP36</b>      | 0.19  | 3.45E-01 | -0.11 | 5.95E-01 |
| <b>TBC1D15</b>        | -0.27 | 1.59E-01 | -0.11 | 5.95E-01 |
| <b>TPTE2P3</b>        | -0.03 | 8.76E-01 | -0.11 | 5.95E-01 |
| <b>YIF1B</b>          | 0.11  | 5.76E-01 | 0.11  | 5.95E-01 |
| <b>AC079630.4</b>     | 0.10  | 6.15E-01 | -0.11 | 5.96E-01 |
| <b>AC092291.2</b>     | -0.06 | 7.60E-01 | -0.11 | 5.96E-01 |
| <b>AC144449.1</b>     | -0.07 | 7.23E-01 | 0.11  | 5.96E-01 |
| <b>AL163193.1</b>     | -0.37 | 5.12E-02 | 0.11  | 5.96E-01 |
| <b>C9orf38</b>        | -0.13 | 5.23E-01 | -0.11 | 5.96E-01 |
| <b>CCNL2P1</b>        | -0.19 | 3.36E-01 | -0.11 | 5.96E-01 |
| <b>CTD-2302E22.5</b>  | 0.13  | 4.99E-01 | -0.11 | 5.96E-01 |
| <b>DNPH1</b>          | 0.02  | 9.05E-01 | 0.11  | 5.96E-01 |
| <b>ETF1P1</b>         | -0.24 | 2.13E-01 | -0.11 | 5.96E-01 |
| <b>FAIM</b>           | 0.15  | 4.39E-01 | -0.11 | 5.96E-01 |
| <b>GHET1</b>          | -0.01 | 9.68E-01 | -0.11 | 5.96E-01 |
| <b>GPT</b>            | -0.18 | 3.61E-01 | -0.11 | 5.96E-01 |
| <b>HBA2</b>           | 0.01  | 9.79E-01 | -0.11 | 5.96E-01 |
| <b>HIST1H4B</b>       | -0.14 | 4.72E-01 | 0.11  | 5.96E-01 |
| <b>HOXA-AS3</b>       | -0.09 | 6.62E-01 | 0.11  | 5.96E-01 |
| <b>HSPD1P1</b>        | 0.08  | 7.01E-01 | -0.11 | 5.96E-01 |
| <b>LA16c-361A3.3</b>  | 0.03  | 8.83E-01 | -0.11 | 5.96E-01 |
| <b>MATN1</b>          | 0.04  | 8.27E-01 | 0.11  | 5.96E-01 |
| <b>MCM10</b>          | 0.08  | 6.85E-01 | -0.11 | 5.96E-01 |
| <b>MIR4737</b>        | -0.34 | 7.51E-02 | -0.11 | 5.96E-01 |
| <b>PARN</b>           | -0.08 | 6.74E-01 | 0.11  | 5.96E-01 |
| <b>PRPF4</b>          | -0.01 | 9.50E-01 | -0.11 | 5.96E-01 |

|                      |       |          |       |          |
|----------------------|-------|----------|-------|----------|
| <b>RN7SL600P</b>     | -0.49 | 8.24E-03 | -0.11 | 5.96E-01 |
| <b>RNU6-1142P</b>    | 0.21  | 2.95E-01 | -0.11 | 5.96E-01 |
| <b>RP11-135N5.3</b>  | -0.11 | 5.71E-01 | -0.11 | 5.96E-01 |
| <b>RP11-314C9.1</b>  | -0.14 | 4.90E-01 | 0.11  | 5.96E-01 |
| <b>RP11-39E3.4</b>   | -0.11 | 5.93E-01 | 0.11  | 5.96E-01 |
| <b>RP11-74C1.4</b>   | -0.38 | 4.92E-02 | -0.11 | 5.96E-01 |
| <b>RP11-950C14.7</b> | 0.09  | 6.66E-01 | -0.11 | 5.96E-01 |
| <b>RPL12P13</b>      | -0.14 | 4.75E-01 | -0.11 | 5.96E-01 |
| <b>RPSAP16</b>       | -0.04 | 8.45E-01 | 0.11  | 5.96E-01 |
| <b>SETP10</b>        | 0.12  | 5.40E-01 | 0.11  | 5.96E-01 |
| <b>ST13P11</b>       | -0.12 | 5.31E-01 | 0.11  | 5.96E-01 |
| <b>TRMT10C</b>       | 0.15  | 4.50E-01 | -0.11 | 5.96E-01 |
| <b>UNC119B</b>       | 0.19  | 3.20E-01 | 0.11  | 5.96E-01 |
| <b>UPF3BP3</b>       | 0.03  | 8.78E-01 | -0.11 | 5.96E-01 |
| <b>ZACN</b>          | -0.16 | 4.27E-01 | -0.11 | 5.96E-01 |
| <b>ZNF322</b>        | 0.05  | 7.97E-01 | -0.11 | 5.96E-01 |
| <b>ACOT1</b>         | 0.33  | 8.59E-02 | -0.11 | 5.97E-01 |
| <b>CTRC</b>          | -0.18 | 3.72E-01 | -0.11 | 5.97E-01 |
| <b>EPPK1</b>         | -0.25 | 2.01E-01 | -0.11 | 5.97E-01 |
| <b>FAM204BP</b>      | 0.00  | 9.92E-01 | -0.11 | 5.97E-01 |
| <b>G3383</b>         | -0.19 | 3.27E-01 | -0.11 | 5.97E-01 |
| <b>KIRREL-IT1</b>    | 0.03  | 8.70E-01 | -0.11 | 5.97E-01 |
| <b>LRP2</b>          | -0.06 | 7.63E-01 | -0.11 | 5.97E-01 |
| <b>MRPS24</b>        | -0.05 | 8.19E-01 | -0.11 | 5.97E-01 |
| <b>RNU6-644P</b>     | 0.06  | 7.58E-01 | -0.11 | 5.97E-01 |
| <b>RP11-296P7.4</b>  | -0.13 | 5.19E-01 | -0.11 | 5.97E-01 |
| <b>RP11-553D4.2</b>  | -0.10 | 6.19E-01 | -0.11 | 5.97E-01 |
| <b>RP11-798G7.8</b>  | -0.14 | 4.85E-01 | -0.11 | 5.97E-01 |
| <b>RP11-87C12.2</b>  | -0.26 | 1.85E-01 | -0.11 | 5.97E-01 |
| <b>RP11-902B17.1</b> | -0.38 | 4.73E-02 | -0.11 | 5.97E-01 |
| <b>SNORA57</b>       | 0.02  | 9.09E-01 | -0.11 | 5.97E-01 |
| <b>TACR2</b>         | -0.29 | 1.37E-01 | -0.11 | 5.97E-01 |
| <b>A2ML1</b>         | 0.34  | 8.00E-02 | 0.11  | 5.97E-01 |
| <b>AC073621.2</b>    | 0.28  | 1.52E-01 | 0.11  | 5.97E-01 |
| <b>ARL2</b>          | 0.04  | 8.44E-01 | 0.11  | 5.97E-01 |
| <b>BLOC1S1</b>       | -0.04 | 8.51E-01 | 0.11  | 5.97E-01 |
| <b>BLVRA</b>         | -0.12 | 5.28E-01 | 0.11  | 5.97E-01 |
| <b>COPG1</b>         | 0.04  | 8.39E-01 | 0.11  | 5.97E-01 |
| <b>EIF5AP3</b>       | -0.04 | 8.24E-01 | 0.11  | 5.97E-01 |
| <b>FBXL4</b>         | -0.10 | 6.17E-01 | 0.11  | 5.97E-01 |
| <b>HAUS4</b>         | 0.26  | 1.73E-01 | 0.11  | 5.97E-01 |
| <b>METTL7A</b>       | 0.25  | 2.04E-01 | 0.11  | 5.97E-01 |
| <b>PPP1CB</b>        | 0.17  | 3.79E-01 | 0.11  | 5.97E-01 |
| <b>PTPN23</b>        | -0.25 | 1.93E-01 | 0.11  | 5.97E-01 |
| <b>STMN2</b>         | -0.18 | 3.65E-01 | 0.11  | 5.97E-01 |
| <b>VN2R10P</b>       | -0.19 | 3.43E-01 | 0.11  | 5.97E-01 |
| <b>ABAT</b>          | -0.05 | 7.84E-01 | 0.11  | 5.98E-01 |

|                      |       |          |       |          |
|----------------------|-------|----------|-------|----------|
| <b>AC004951.5</b>    | 0.15  | 4.50E-01 | 0.11  | 5.98E-01 |
| <b>C8orf31</b>       | -0.17 | 3.82E-01 | -0.11 | 5.98E-01 |
| <b>CCNY</b>          | -0.06 | 7.67E-01 | -0.11 | 5.98E-01 |
| <b>CTB-129O4.1</b>   | -0.07 | 7.22E-01 | 0.11  | 5.98E-01 |
| <b>DNASE2</b>        | 0.05  | 8.04E-01 | 0.11  | 5.98E-01 |
| <b>ETNK1</b>         | 0.15  | 4.39E-01 | -0.11 | 5.98E-01 |
| <b>G28051</b>        | 0.14  | 4.71E-01 | 0.11  | 5.98E-01 |
| <b>GS1-259H13.2</b>  | -0.10 | 6.07E-01 | -0.11 | 5.98E-01 |
| <b>HBB</b>           | 0.02  | 9.27E-01 | -0.11 | 5.98E-01 |
| <b>LRRC37A7P</b>     | -0.44 | 1.86E-02 | -0.11 | 5.98E-01 |
| <b>METTL1</b>        | 0.08  | 6.80E-01 | 0.11  | 5.98E-01 |
| <b>MSH2</b>          | -0.19 | 3.41E-01 | -0.11 | 5.98E-01 |
| <b>MYOM1</b>         | -0.07 | 7.33E-01 | 0.11  | 5.98E-01 |
| <b>PGM3</b>          | -0.11 | 5.71E-01 | -0.11 | 5.98E-01 |
| <b>PPP1R2P3</b>      | -0.20 | 3.06E-01 | 0.11  | 5.98E-01 |
| <b>RP11-120J1.1</b>  | 0.02  | 9.14E-01 | 0.11  | 5.98E-01 |
| <b>RP11-386I14.3</b> | -0.32 | 9.93E-02 | -0.11 | 5.98E-01 |
| <b>RP11-438L7.3</b>  | 0.02  | 9.32E-01 | 0.11  | 5.98E-01 |
| <b>SRP54</b>         | 0.15  | 4.57E-01 | -0.11 | 5.98E-01 |
| <b>ST20-AS1</b>      | -0.28 | 1.44E-01 | 0.11  | 5.98E-01 |
| <b>WASH2P</b>        | -0.32 | 9.81E-02 | -0.11 | 5.98E-01 |
| <b>ZBTB20-AS3</b>    | 0.06  | 7.79E-01 | -0.11 | 5.98E-01 |
| <b>ZNF335</b>        | 0.00  | 9.80E-01 | 0.11  | 5.98E-01 |
| <b>AC011431.1</b>    | -0.15 | 4.54E-01 | 0.11  | 5.99E-01 |
| <b>ARPC3</b>         | 0.29  | 1.32E-01 | 0.11  | 5.99E-01 |
| <b>ASB13</b>         | 0.26  | 1.89E-01 | 0.11  | 5.99E-01 |
| <b>C17orf50</b>      | -0.06 | 7.61E-01 | 0.11  | 5.99E-01 |
| <b>ENTPD3-AS1</b>    | 0.27  | 1.63E-01 | 0.11  | 5.99E-01 |
| <b>ETV4</b>          | 0.15  | 4.58E-01 | 0.11  | 5.99E-01 |
| <b>FXNP2</b>         | -0.28 | 1.48E-01 | 0.11  | 5.99E-01 |
| <b>HPDL</b>          | 0.10  | 6.16E-01 | 0.11  | 5.99E-01 |
| <b>LUZP1</b>         | 0.16  | 4.23E-01 | 0.11  | 5.99E-01 |
| <b>MIEN1</b>         | 0.26  | 1.83E-01 | 0.11  | 5.99E-01 |
| <b>NDUFB3</b>        | 0.04  | 8.32E-01 | 0.11  | 5.99E-01 |
| <b>PHF19</b>         | 0.04  | 8.25E-01 | 0.11  | 5.99E-01 |
| <b>PIK3CB</b>        | 0.00  | 9.88E-01 | 0.11  | 5.99E-01 |
| <b>RPL7P23</b>       | -0.10 | 6.25E-01 | 0.11  | 5.99E-01 |
| <b>SIRPA</b>         | 0.20  | 3.01E-01 | 0.11  | 5.99E-01 |
| <b>STUB1</b>         | 0.11  | 5.91E-01 | 0.11  | 5.99E-01 |
| <b>TCEB2P4</b>       | -0.03 | 8.95E-01 | 0.11  | 5.99E-01 |
| <b>TIMP1</b>         | -0.29 | 1.31E-01 | 0.11  | 5.99E-01 |
| <b>TTC39A</b>        | 0.08  | 6.83E-01 | 0.11  | 5.99E-01 |
| <b>WDR82P2</b>       | -0.17 | 3.73E-01 | 0.11  | 5.99E-01 |
| <b>AC016712.2</b>    | 0.13  | 5.15E-01 | -0.11 | 5.99E-01 |
| <b>ATP6V1B1</b>      | -0.19 | 3.24E-01 | -0.11 | 5.99E-01 |
| <b>CLDND2</b>        | -0.10 | 6.20E-01 | -0.11 | 5.99E-01 |
| <b>CTA-390C10.10</b> | -0.14 | 4.86E-01 | -0.11 | 5.99E-01 |

|                       |       |          |       |          |
|-----------------------|-------|----------|-------|----------|
| <b>CTD-2349P21.10</b> | 0.10  | 6.04E-01 | -0.11 | 5.99E-01 |
| <b>DTYMK</b>          | 0.06  | 7.46E-01 | -0.11 | 5.99E-01 |
| <b>EID2B</b>          | -0.17 | 3.93E-01 | -0.11 | 5.99E-01 |
| <b>ERVH48-1</b>       | -0.29 | 1.31E-01 | -0.11 | 5.99E-01 |
| <b>G23133</b>         | -0.11 | 5.70E-01 | -0.11 | 5.99E-01 |
| <b>G41968</b>         | -0.10 | 6.16E-01 | -0.11 | 5.99E-01 |
| <b>GSTT2</b>          | -0.05 | 7.83E-01 | -0.11 | 5.99E-01 |
| <b>LINC01352</b>      | 0.13  | 5.21E-01 | -0.11 | 5.99E-01 |
| <b>MAPK8IP3</b>       | -0.07 | 7.19E-01 | -0.11 | 5.99E-01 |
| <b>MRPL35P2</b>       | -0.25 | 1.98E-01 | -0.11 | 5.99E-01 |
| <b>NAP1L4P1</b>       | 0.23  | 2.34E-01 | -0.11 | 5.99E-01 |
| <b>PPIAP22</b>        | 0.15  | 4.44E-01 | -0.11 | 5.99E-01 |
| <b>RN7SL653P</b>      | 0.38  | 4.36E-02 | -0.11 | 5.99E-01 |
| <b>RP11-875O11.1</b>  | 0.22  | 2.63E-01 | -0.11 | 5.99E-01 |
| <b>RPL7L1P3</b>       | 0.30  | 1.19E-01 | -0.11 | 5.99E-01 |
| <b>SEC22B</b>         | 0.18  | 3.55E-01 | -0.11 | 5.99E-01 |
| <b>SKI</b>            | -0.26 | 1.83E-01 | -0.11 | 5.99E-01 |
| <b>TFP1</b>           | -0.20 | 3.06E-01 | -0.11 | 5.99E-01 |
| <b>AC016629.3</b>     | 0.00  | 9.90E-01 | -0.11 | 6.00E-01 |
| <b>AC097658.1</b>     | -0.18 | 3.52E-01 | 0.11  | 6.00E-01 |
| <b>AGER</b>           | -0.21 | 2.81E-01 | -0.11 | 6.00E-01 |
| <b>AL591479.1</b>     | 0.12  | 5.47E-01 | 0.11  | 6.00E-01 |
| <b>APPBP2</b>         | 0.22  | 2.54E-01 | 0.11  | 6.00E-01 |
| <b>ARIH1</b>          | 0.12  | 5.42E-01 | -0.11 | 6.00E-01 |
| <b>ARL8B</b>          | 0.10  | 6.17E-01 | 0.11  | 6.00E-01 |
| <b>CCDC154</b>        | -0.08 | 6.78E-01 | -0.11 | 6.00E-01 |
| <b>CLDN7</b>          | 0.38  | 4.73E-02 | 0.11  | 6.00E-01 |
| <b>COLGALT2</b>       | 0.02  | 9.03E-01 | 0.11  | 6.00E-01 |
| <b>CTC-303L1.2</b>    | 0.11  | 5.90E-01 | -0.11 | 6.00E-01 |
| <b>CTD-2370N5.3</b>   | 0.18  | 3.62E-01 | 0.11  | 6.00E-01 |
| <b>EPHA7</b>          | 0.14  | 4.72E-01 | 0.11  | 6.00E-01 |
| <b>EPRS</b>           | 0.15  | 4.44E-01 | -0.11 | 6.00E-01 |
| <b>FXVD7</b>          | 0.06  | 7.47E-01 | 0.11  | 6.00E-01 |
| <b>G19262</b>         | -0.01 | 9.76E-01 | -0.11 | 6.00E-01 |
| <b>G8321</b>          | 0.21  | 2.82E-01 | 0.11  | 6.00E-01 |
| <b>HNRNPA1P54</b>     | 0.02  | 9.27E-01 | -0.11 | 6.00E-01 |
| <b>KCTD20</b>         | -0.21 | 2.82E-01 | -0.11 | 6.00E-01 |
| <b>MCMBP</b>          | 0.13  | 5.01E-01 | -0.11 | 6.00E-01 |
| <b>MIR548U</b>        | -0.19 | 3.20E-01 | -0.11 | 6.00E-01 |
| <b>MYADML</b>         | -0.34 | 7.61E-02 | 0.11  | 6.00E-01 |
| <b>PITRM1</b>         | 0.08  | 7.01E-01 | 0.11  | 6.00E-01 |
| <b>RN7SKP40</b>       | -0.20 | 3.05E-01 | -0.11 | 6.00E-01 |
| <b>RP11-307C19.1</b>  | -0.17 | 3.81E-01 | -0.11 | 6.00E-01 |
| <b>RP11-46H11.12</b>  | -0.01 | 9.45E-01 | 0.11  | 6.00E-01 |
| <b>RP11-677M14.5</b>  | -0.02 | 9.37E-01 | -0.11 | 6.00E-01 |
| <b>RP11-973D8.5</b>   | 0.11  | 5.78E-01 | 0.11  | 6.00E-01 |
| <b>RP4-744I24.4</b>   | 0.01  | 9.50E-01 | -0.11 | 6.00E-01 |

|               |       |          |       |          |
|---------------|-------|----------|-------|----------|
| RP5-951N9.1   | -0.07 | 7.25E-01 | -0.11 | 6.00E-01 |
| TMEM128       | 0.12  | 5.30E-01 | -0.11 | 6.00E-01 |
| AC106900.6    | -0.28 | 1.53E-01 | -0.11 | 6.01E-01 |
| BIRC5         | 0.10  | 6.04E-01 | 0.11  | 6.01E-01 |
| BMS1          | 0.16  | 4.06E-01 | -0.11 | 6.01E-01 |
| C15orf53      | 0.00  | 9.89E-01 | 0.11  | 6.01E-01 |
| COA7          | 0.13  | 5.10E-01 | -0.11 | 6.01E-01 |
| CTD-237103.3  | -0.12 | 5.54E-01 | -0.11 | 6.01E-01 |
| CTD-3018017.6 | -0.19 | 3.34E-01 | 0.11  | 6.01E-01 |
| FAM90A20P     | -0.08 | 6.97E-01 | -0.11 | 6.01E-01 |
| G41381        | 0.32  | 9.30E-02 | 0.11  | 6.01E-01 |
| GCC1          | 0.10  | 6.13E-01 | 0.11  | 6.01E-01 |
| GLYATL1       | 0.22  | 2.59E-01 | 0.11  | 6.01E-01 |
| HPGD          | -0.09 | 6.49E-01 | 0.11  | 6.01E-01 |
| KIAA0226L     | 0.08  | 7.01E-01 | 0.11  | 6.01E-01 |
| LINC00989     | -0.04 | 8.38E-01 | 0.11  | 6.01E-01 |
| LINC01089     | -0.08 | 6.76E-01 | -0.11 | 6.01E-01 |
| MBD2          | -0.03 | 8.65E-01 | -0.11 | 6.01E-01 |
| MKL1          | -0.10 | 6.30E-01 | 0.11  | 6.01E-01 |
| NEU1          | 0.02  | 9.24E-01 | 0.11  | 6.01E-01 |
| NPM1P19       | 0.09  | 6.48E-01 | 0.11  | 6.01E-01 |
| PMS2P2        | -0.05 | 7.99E-01 | 0.11  | 6.01E-01 |
| RIBC1         | 0.15  | 4.32E-01 | -0.11 | 6.01E-01 |
| RIC8B         | 0.13  | 4.96E-01 | -0.11 | 6.01E-01 |
| RNY4P17       | -0.25 | 2.03E-01 | -0.11 | 6.01E-01 |
| RP1-140K8.5   | -0.04 | 8.23E-01 | 0.11  | 6.01E-01 |
| RP11-454K7.3  | -0.02 | 9.15E-01 | -0.11 | 6.01E-01 |
| RP11-46J23.1  | -0.29 | 1.32E-01 | 0.11  | 6.01E-01 |
| RP11-679B19.1 | -0.14 | 4.65E-01 | 0.11  | 6.01E-01 |
| RP11-697H9.2  | -0.11 | 5.76E-01 | -0.11 | 6.01E-01 |
| RP4-669H2.1   | -0.28 | 1.53E-01 | -0.11 | 6.01E-01 |
| RP5-940J5.6   | -0.10 | 6.02E-01 | -0.11 | 6.01E-01 |
| RPL7P52       | 0.00  | 9.83E-01 | -0.11 | 6.01E-01 |
| RSL24D1P8     | 0.43  | 2.15E-02 | -0.11 | 6.01E-01 |
| SETD5         | -0.03 | 8.63E-01 | 0.11  | 6.01E-01 |
| SHQ1          | 0.16  | 4.28E-01 | 0.11  | 6.01E-01 |
| SLC30A8       | -0.41 | 2.99E-02 | 0.11  | 6.01E-01 |
| SNORD125      | 0.39  | 3.97E-02 | 0.11  | 6.01E-01 |
| SNTB2         | 0.14  | 4.78E-01 | 0.11  | 6.01E-01 |
| TRPV1         | 0.04  | 8.26E-01 | -0.11 | 6.01E-01 |
| U91328.2      | -0.04 | 8.43E-01 | 0.11  | 6.01E-01 |
| VEPH1         | -0.19 | 3.29E-01 | 0.11  | 6.01E-01 |
| XLOC_007894   | -0.40 | 3.56E-02 | -0.11 | 6.01E-01 |
| ZNF516        | -0.03 | 8.90E-01 | 0.11  | 6.01E-01 |
| ADAM15        | 0.00  | 9.88E-01 | 0.11  | 6.02E-01 |
| ADTRP         | 0.11  | 5.81E-01 | -0.11 | 6.02E-01 |
| AGAP4         | 0.17  | 4.00E-01 | 0.11  | 6.02E-01 |



|               |       |          |       |          |
|---------------|-------|----------|-------|----------|
| AKR1C1        | -0.09 | 6.62E-01 | -0.11 | 6.02E-01 |
| BNIP3P40      | -0.07 | 7.22E-01 | -0.11 | 6.02E-01 |
| CAV2          | 0.04  | 8.46E-01 | -0.11 | 6.02E-01 |
| CBWD5         | -0.49 | 8.44E-03 | 0.11  | 6.02E-01 |
| CEP112        | -0.34 | 7.24E-02 | -0.11 | 6.02E-01 |
| GDPD5         | -0.03 | 8.76E-01 | 0.11  | 6.02E-01 |
| MIR22HG       | 0.06  | 7.54E-01 | -0.11 | 6.02E-01 |
| OR5E1P        | -0.30 | 1.25E-01 | -0.11 | 6.02E-01 |
| PDSS1         | 0.28  | 1.44E-01 | 0.11  | 6.02E-01 |
| PLIN2         | 0.14  | 4.68E-01 | -0.11 | 6.02E-01 |
| RAX           | -0.26 | 1.90E-01 | -0.11 | 6.02E-01 |
| RMRPP4        | 0.10  | 6.03E-01 | 0.11  | 6.02E-01 |
| RP11-384K6.6  | 0.03  | 8.89E-01 | -0.11 | 6.02E-01 |
| RP11-511I11.1 | -0.07 | 7.11E-01 | 0.11  | 6.02E-01 |
| RP11-530N7.2  | 0.07  | 7.37E-01 | -0.11 | 6.02E-01 |
| RP11-553K8.5  | -0.22 | 2.69E-01 | 0.11  | 6.02E-01 |
| RP11-596C23.6 | -0.22 | 2.65E-01 | 0.11  | 6.02E-01 |
| RP11-7F17.8   | 0.04  | 8.58E-01 | -0.11 | 6.02E-01 |
| RP11-83A16.1  | -0.51 | 5.29E-03 | 0.11  | 6.02E-01 |
| RP13-631K18.2 | 0.14  | 4.68E-01 | 0.11  | 6.02E-01 |
| RP4-530I15.9  | -0.25 | 1.99E-01 | -0.11 | 6.02E-01 |
| RP4-798A10.2  | 0.02  | 9.20E-01 | -0.11 | 6.02E-01 |
| RPL7P7        | -0.25 | 2.06E-01 | 0.11  | 6.02E-01 |
| SLC2A10       | -0.16 | 4.08E-01 | 0.11  | 6.02E-01 |
| SLC38A9       | 0.24  | 2.10E-01 | -0.11 | 6.02E-01 |
| SLC3A1        | -0.12 | 5.27E-01 | -0.11 | 6.02E-01 |
| SLC9A9-AS2    | -0.19 | 3.41E-01 | 0.11  | 6.02E-01 |
| SPDYE12P      | -0.15 | 4.60E-01 | -0.11 | 6.02E-01 |
| SYPL2         | -0.29 | 1.40E-01 | -0.11 | 6.02E-01 |
| TOP1MT        | 0.16  | 4.02E-01 | 0.11  | 6.02E-01 |
| TRPS1         | -0.06 | 7.46E-01 | -0.11 | 6.02E-01 |
| TTC41P        | 0.02  | 9.01E-01 | -0.11 | 6.02E-01 |
| XLOC_011615   | -0.44 | 1.92E-02 | -0.11 | 6.02E-01 |
| Z98941.1      | -0.27 | 1.58E-01 | 0.11  | 6.02E-01 |
| ZNF181        | 0.20  | 3.06E-01 | -0.11 | 6.02E-01 |
| AP000892.6    | -0.22 | 2.65E-01 | -0.10 | 6.03E-01 |
| AP003041.2    | 0.15  | 4.53E-01 | 0.10  | 6.03E-01 |
| ARL17B        | -0.20 | 3.11E-01 | -0.10 | 6.03E-01 |
| ATXN7L3       | 0.28  | 1.47E-01 | 0.10  | 6.03E-01 |
| CP            | -0.05 | 8.08E-01 | -0.10 | 6.03E-01 |
| DOLK          | 0.21  | 2.93E-01 | 0.10  | 6.03E-01 |
| EBI3          | 0.55  | 2.69E-03 | 0.10  | 6.03E-01 |
| F11R          | 0.26  | 1.76E-01 | 0.10  | 6.03E-01 |
| FAM19A5       | -0.20 | 3.11E-01 | -0.10 | 6.03E-01 |
| G38764        | 0.05  | 7.87E-01 | 0.10  | 6.03E-01 |
| GCLC          | -0.17 | 3.96E-01 | -0.10 | 6.03E-01 |
| GTF2IP5       | 0.11  | 5.72E-01 | -0.10 | 6.03E-01 |

|                      |       |          |       |          |
|----------------------|-------|----------|-------|----------|
| <b>HSD52</b>         | -0.06 | 7.53E-01 | -0.10 | 6.03E-01 |
| <b>KRT8P39</b>       | -0.11 | 5.78E-01 | 0.10  | 6.03E-01 |
| <b>NBPF10</b>        | -0.20 | 2.97E-01 | -0.10 | 6.03E-01 |
| <b>RN7SL552P</b>     | -0.17 | 4.01E-01 | -0.10 | 6.03E-01 |
| <b>RNF38</b>         | -0.24 | 2.21E-01 | -0.10 | 6.03E-01 |
| <b>RNU6-190P</b>     | -0.01 | 9.43E-01 | 0.10  | 6.03E-01 |
| <b>RP11-317G6.1</b>  | -0.17 | 3.79E-01 | -0.10 | 6.03E-01 |
| <b>RP11-330C7.3</b>  | 0.18  | 3.53E-01 | -0.10 | 6.03E-01 |
| <b>RP11-649E7.8</b>  | -0.26 | 1.89E-01 | 0.10  | 6.03E-01 |
| <b>RP11-766H1.1</b>  | -0.19 | 3.43E-01 | 0.10  | 6.03E-01 |
| <b>RP5-1007H16.1</b> | 0.07  | 7.17E-01 | -0.10 | 6.03E-01 |
| <b>RPL7AP66</b>      | 0.16  | 4.08E-01 | -0.10 | 6.03E-01 |
| <b>RRN3P2</b>        | -0.01 | 9.61E-01 | -0.10 | 6.03E-01 |
| <b>RSP04</b>         | 0.03  | 8.85E-01 | -0.10 | 6.03E-01 |
| <b>SDE2</b>          | 0.10  | 6.05E-01 | -0.10 | 6.03E-01 |
| <b>SERF1B</b>        | -0.15 | 4.32E-01 | -0.10 | 6.03E-01 |
| <b>SLC10A4</b>       | -0.15 | 4.60E-01 | -0.10 | 6.03E-01 |
| <b>SLC47A1P1</b>     | 0.05  | 7.82E-01 | -0.10 | 6.03E-01 |
| <b>SUPT16HP1</b>     | -0.20 | 3.09E-01 | 0.10  | 6.03E-01 |
| <b>TBX15</b>         | -0.21 | 2.85E-01 | -0.10 | 6.03E-01 |
| <b>UBE2D3P3</b>      | 0.17  | 3.89E-01 | 0.10  | 6.03E-01 |
| <b>VAMP4</b>         | -0.25 | 1.97E-01 | -0.10 | 6.03E-01 |
| <b>AC002117.1</b>    | 0.43  | 2.27E-02 | -0.10 | 6.04E-01 |
| <b>AC016735.2</b>    | -0.19 | 3.20E-01 | -0.10 | 6.04E-01 |
| <b>C16orf91</b>      | 0.13  | 5.01E-01 | -0.10 | 6.04E-01 |
| <b>CHMP1A</b>        | -0.04 | 8.36E-01 | 0.10  | 6.04E-01 |
| <b>CMTM5</b>         | 0.07  | 7.32E-01 | 0.10  | 6.04E-01 |
| <b>CTB-187L3.1</b>   | -0.04 | 8.32E-01 | 0.10  | 6.04E-01 |
| <b>CTB-3M24.2</b>    | 0.01  | 9.76E-01 | -0.10 | 6.04E-01 |
| <b>DNAJC22</b>       | -0.07 | 7.36E-01 | -0.10 | 6.04E-01 |
| <b>EDF1</b>          | 0.11  | 5.78E-01 | 0.10  | 6.04E-01 |
| <b>ERAP1</b>         | 0.17  | 3.82E-01 | 0.10  | 6.04E-01 |
| <b>FAM177B</b>       | 0.12  | 5.29E-01 | 0.10  | 6.04E-01 |
| <b>FLNA</b>          | 0.01  | 9.76E-01 | 0.10  | 6.04E-01 |
| <b>FOXO4</b>         | -0.06 | 7.73E-01 | 0.10  | 6.04E-01 |
| <b>FTH1P3</b>        | -0.28 | 1.55E-01 | -0.10 | 6.04E-01 |
| <b>FTO</b>           | -0.30 | 1.17E-01 | 0.10  | 6.04E-01 |
| <b>H2AFY</b>         | 0.34  | 7.42E-02 | 0.10  | 6.04E-01 |
| <b>IFI27L2</b>       | 0.30  | 1.24E-01 | 0.10  | 6.04E-01 |
| <b>IL33</b>          | 0.20  | 3.14E-01 | 0.10  | 6.04E-01 |
| <b>PDSS2</b>         | -0.04 | 8.23E-01 | 0.10  | 6.04E-01 |
| <b>PRRG3</b>         | -0.11 | 5.88E-01 | -0.10 | 6.04E-01 |
| <b>RNU7-163P</b>     | -0.02 | 9.20E-01 | 0.10  | 6.04E-01 |
| <b>RP11-295B17.6</b> | -0.38 | 4.47E-02 | 0.10  | 6.04E-01 |
| <b>RP11-342K6.1</b>  | 0.03  | 8.61E-01 | -0.10 | 6.04E-01 |
| <b>RP11-343C2.10</b> | 0.26  | 1.80E-01 | 0.10  | 6.04E-01 |
| <b>RP11-353N4.2</b>  | 0.19  | 3.39E-01 | 0.10  | 6.04E-01 |

|               |       |          |       |          |
|---------------|-------|----------|-------|----------|
| RP11-368I7.4  | -0.13 | 5.04E-01 | -0.10 | 6.04E-01 |
| RP11-732M18.4 | -0.30 | 1.27E-01 | -0.10 | 6.04E-01 |
| RP11-843P14.1 | -0.21 | 2.94E-01 | 0.10  | 6.04E-01 |
| SELM          | -0.17 | 3.99E-01 | -0.10 | 6.04E-01 |
| SRP19         | 0.04  | 8.37E-01 | -0.10 | 6.04E-01 |
| ST8SIA1       | 0.04  | 8.56E-01 | 0.10  | 6.04E-01 |
| TMEM246-AS1   | -0.08 | 6.98E-01 | -0.10 | 6.04E-01 |
| UBE4B         | -0.27 | 1.61E-01 | 0.10  | 6.04E-01 |
| ZNF559-ZNF177 | 0.16  | 4.03E-01 | -0.10 | 6.04E-01 |
| ACTG1P20      | -0.18 | 3.72E-01 | -0.10 | 6.05E-01 |
| ADPGK-AS1     | 0.42  | 2.50E-02 | 0.10  | 6.05E-01 |
| ANKHD1        | -0.13 | 5.10E-01 | -0.10 | 6.05E-01 |
| C1orf122      | 0.16  | 4.25E-01 | -0.10 | 6.05E-01 |
| CFAP46        | 0.02  | 9.36E-01 | -0.10 | 6.05E-01 |
| CHRNA2        | 0.04  | 8.44E-01 | -0.10 | 6.05E-01 |
| CNIH2         | -0.16 | 4.27E-01 | -0.10 | 6.05E-01 |
| COLGALT1      | 0.15  | 4.44E-01 | 0.10  | 6.05E-01 |
| CTB-1144G6.6  | 0.13  | 5.00E-01 | -0.10 | 6.05E-01 |
| CTD-2008P7.9  | -0.07 | 7.10E-01 | -0.10 | 6.05E-01 |
| CTD-2384B9.1  | 0.03  | 8.61E-01 | 0.10  | 6.05E-01 |
| DND1P1        | -0.08 | 6.68E-01 | -0.10 | 6.05E-01 |
| FCGR2B        | 0.10  | 6.18E-01 | 0.10  | 6.05E-01 |
| G23688        | -0.19 | 3.32E-01 | -0.10 | 6.05E-01 |
| GULP1         | -0.12 | 5.31E-01 | -0.10 | 6.05E-01 |
| HBG2          | -0.32 | 9.78E-02 | 0.10  | 6.05E-01 |
| HOXA9         | 0.03  | 8.92E-01 | 0.10  | 6.05E-01 |
| KRT8P46       | 0.30  | 1.26E-01 | -0.10 | 6.05E-01 |
| MAN2C1        | -0.05 | 8.09E-01 | -0.10 | 6.05E-01 |
| MAP2K1        | 0.20  | 3.07E-01 | 0.10  | 6.05E-01 |
| 4-Mar         | -0.10 | 6.28E-01 | -0.10 | 6.05E-01 |
| MAU2          | 0.21  | 2.89E-01 | 0.10  | 6.05E-01 |
| NDST2         | 0.19  | 3.20E-01 | 0.10  | 6.05E-01 |
| P2RX6         | 0.05  | 7.92E-01 | -0.10 | 6.05E-01 |
| RHNO1         | 0.34  | 7.87E-02 | 0.10  | 6.05E-01 |
| RP11-101E7.2  | -0.24 | 2.15E-01 | -0.10 | 6.05E-01 |
| RP11-122C5.3  | -0.17 | 3.94E-01 | 0.10  | 6.05E-01 |
| RP11-166B2.3  | 0.17  | 3.82E-01 | 0.10  | 6.05E-01 |
| RP11-286E11.2 | 0.12  | 5.31E-01 | 0.10  | 6.05E-01 |
| RP11-569G9.7  | -0.15 | 4.46E-01 | 0.10  | 6.05E-01 |
| SLC25A39P1    | 0.18  | 3.65E-01 | -0.10 | 6.05E-01 |
| STAMBP        | 0.22  | 2.56E-01 | -0.10 | 6.05E-01 |
| TJP1          | -0.04 | 8.24E-01 | 0.10  | 6.05E-01 |
| UBXN4         | 0.11  | 5.91E-01 | -0.10 | 6.05E-01 |
| WHAMM         | -0.04 | 8.24E-01 | 0.10  | 6.05E-01 |
| XPO6          | 0.20  | 3.09E-01 | 0.10  | 6.05E-01 |
| YTHDF2        | 0.27  | 1.60E-01 | 0.10  | 6.05E-01 |
| AC002542.2    | 0.02  | 9.28E-01 | 0.10  | 6.06E-01 |

|               |       |          |       |          |
|---------------|-------|----------|-------|----------|
| AC009961.5    | -0.18 | 3.66E-01 | -0.10 | 6.06E-01 |
| AC012363.7    | -0.01 | 9.67E-01 | 0.10  | 6.06E-01 |
| AF121897.4    | 0.16  | 4.15E-01 | -0.10 | 6.06E-01 |
| BCL2L2-PABPN1 | -0.03 | 8.89E-01 | -0.10 | 6.06E-01 |
| CRK           | 0.20  | 3.09E-01 | 0.10  | 6.06E-01 |
| CX3CR1        | 0.38  | 4.81E-02 | 0.10  | 6.06E-01 |
| DUSP15        | -0.05 | 7.88E-01 | -0.10 | 6.06E-01 |
| ENTPD6        | -0.09 | 6.42E-01 | 0.10  | 6.06E-01 |
| ERCC4         | 0.09  | 6.57E-01 | -0.10 | 6.06E-01 |
| FAM104A       | 0.08  | 6.79E-01 | 0.10  | 6.06E-01 |
| FBXO7         | -0.01 | 9.58E-01 | -0.10 | 6.06E-01 |
| GCM2          | -0.20 | 2.97E-01 | -0.10 | 6.06E-01 |
| GTPBP8        | -0.06 | 7.78E-01 | -0.10 | 6.06E-01 |
| ITGAV         | 0.21  | 2.73E-01 | 0.10  | 6.06E-01 |
| KCNMA1        | -0.08 | 6.95E-01 | 0.10  | 6.06E-01 |
| LDB1          | -0.18 | 3.55E-01 | 0.10  | 6.06E-01 |
| LEMD3         | 0.13  | 5.08E-01 | -0.10 | 6.06E-01 |
| LGALS4        | -0.31 | 1.04E-01 | -0.10 | 6.06E-01 |
| LINC00337     | 0.05  | 7.92E-01 | -0.10 | 6.06E-01 |
| LINC00942     | -0.22 | 2.57E-01 | -0.10 | 6.06E-01 |
| ME3           | -0.02 | 9.02E-01 | -0.10 | 6.06E-01 |
| MIR26A1       | 0.09  | 6.44E-01 | -0.10 | 6.06E-01 |
| NRIP2         | -0.32 | 9.62E-02 | -0.10 | 6.06E-01 |
| PPIB          | 0.23  | 2.33E-01 | 0.10  | 6.06E-01 |
| RP11-613F22.6 | 0.11  | 5.84E-01 | -0.10 | 6.06E-01 |
| RP11-65L3.2   | 0.00  | 9.91E-01 | -0.10 | 6.06E-01 |
| RP11-696N14.1 | 0.09  | 6.63E-01 | -0.10 | 6.06E-01 |
| RP11-95I19.2  | 0.14  | 4.86E-01 | -0.10 | 6.06E-01 |
| RP3-418A9.3   | -0.46 | 1.43E-02 | 0.10  | 6.06E-01 |
| RPS19         | 0.37  | 5.01E-02 | -0.10 | 6.06E-01 |
| SNX17         | 0.20  | 3.03E-01 | 0.10  | 6.06E-01 |
| TOMM70A       | 0.24  | 2.20E-01 | -0.10 | 6.06E-01 |
| ZBTB8OS       | -0.01 | 9.74E-01 | 0.10  | 6.06E-01 |
| ZNF204P       | -0.05 | 7.95E-01 | -0.10 | 6.06E-01 |
| AC023137.2    | -0.21 | 2.93E-01 | -0.10 | 6.07E-01 |
| AC069547.2    | -0.14 | 4.65E-01 | -0.10 | 6.07E-01 |
| ACTG1P17      | -0.21 | 2.72E-01 | 0.10  | 6.07E-01 |
| ADAM20P1      | 0.03  | 8.91E-01 | -0.10 | 6.07E-01 |
| ADAM32        | 0.12  | 5.27E-01 | 0.10  | 6.07E-01 |
| ATXN10        | 0.05  | 7.82E-01 | 0.10  | 6.07E-01 |
| C6orf52       | -0.28 | 1.56E-01 | 0.10  | 6.07E-01 |
| CHID1         | 0.25  | 2.05E-01 | 0.10  | 6.07E-01 |
| CHODL-AS1     | -0.17 | 3.73E-01 | -0.10 | 6.07E-01 |
| COL9A2        | 0.12  | 5.29E-01 | -0.10 | 6.07E-01 |
| CTB-171A8.1   | 0.28  | 1.56E-01 | -0.10 | 6.07E-01 |
| DAAM2         | -0.35 | 6.91E-02 | 0.10  | 6.07E-01 |
| DUSP8P5       | 0.04  | 8.22E-01 | 0.10  | 6.07E-01 |

|               |       |          |       |          |
|---------------|-------|----------|-------|----------|
| EIF4H         | -0.02 | 9.17E-01 | 0.10  | 6.07E-01 |
| FLJ30679      | -0.05 | 7.84E-01 | 0.10  | 6.07E-01 |
| GALT          | -0.11 | 5.84E-01 | 0.10  | 6.07E-01 |
| GTF2IRD1      | 0.00  | 9.83E-01 | 0.10  | 6.07E-01 |
| HERC2P2       | -0.02 | 9.04E-01 | 0.10  | 6.07E-01 |
| HIST2H3C      | -0.19 | 3.26E-01 | 0.10  | 6.07E-01 |
| LINC00114     | 0.21  | 2.82E-01 | 0.10  | 6.07E-01 |
| LRIG1         | -0.02 | 9.32E-01 | -0.10 | 6.07E-01 |
| RAB40C        | -0.07 | 7.19E-01 | -0.10 | 6.07E-01 |
| RHOQP3        | -0.02 | 9.23E-01 | 0.10  | 6.07E-01 |
| RIMS2         | 0.02  | 9.31E-01 | 0.10  | 6.07E-01 |
| RNU6-787P     | 0.00  | 9.89E-01 | -0.10 | 6.07E-01 |
| RP11-102G14.1 | 0.04  | 8.21E-01 | -0.10 | 6.07E-01 |
| RP11-20G13.3  | -0.19 | 3.25E-01 | -0.10 | 6.07E-01 |
| RP11-521I2.3  | -0.23 | 2.34E-01 | -0.10 | 6.07E-01 |
| RP11-849H4.2  | -0.28 | 1.48E-01 | 0.10  | 6.07E-01 |
| RP11-861E21.2 | 0.20  | 3.19E-01 | -0.10 | 6.07E-01 |
| RP11-88G17.6  | -0.19 | 3.25E-01 | 0.10  | 6.07E-01 |
| RP3-388M5.8   | -0.40 | 3.53E-02 | 0.10  | 6.07E-01 |
| RPL21P28      | 0.07  | 7.22E-01 | -0.10 | 6.07E-01 |
| S100A16       | 0.13  | 5.09E-01 | 0.10  | 6.07E-01 |
| SLC22A5       | -0.01 | 9.75E-01 | -0.10 | 6.07E-01 |
| SP2           | -0.17 | 3.87E-01 | 0.10  | 6.07E-01 |
| SWAP70        | -0.13 | 5.02E-01 | -0.10 | 6.07E-01 |
| SYT16         | 0.02  | 9.06E-01 | 0.10  | 6.07E-01 |
| SYT6          | -0.41 | 3.18E-02 | -0.10 | 6.07E-01 |
| TIMM8A        | 0.21  | 2.92E-01 | 0.10  | 6.07E-01 |
| TRNT1         | 0.04  | 8.37E-01 | -0.10 | 6.07E-01 |
| ULK2          | -0.02 | 9.11E-01 | 0.10  | 6.07E-01 |
| XLOC_010693   | 0.02  | 9.02E-01 | 0.10  | 6.07E-01 |
| ZNF142        | 0.19  | 3.39E-01 | 0.10  | 6.07E-01 |
| ZNF232        | 0.13  | 5.14E-01 | 0.10  | 6.07E-01 |
| ZNF37A        | 0.18  | 3.60E-01 | -0.10 | 6.07E-01 |
| BCL2L2        | -0.04 | 8.31E-01 | 0.10  | 6.08E-01 |
| BTG2          | 0.05  | 8.08E-01 | 0.10  | 6.08E-01 |
| CTD-2002J20.1 | 0.35  | 7.15E-02 | 0.10  | 6.08E-01 |
| CUTA          | 0.00  | 9.82E-01 | 0.10  | 6.08E-01 |
| DYNLRB1       | 0.00  | 9.98E-01 | 0.10  | 6.08E-01 |
| EPHX1         | -0.03 | 8.67E-01 | 0.10  | 6.08E-01 |
| FAM69B        | -0.11 | 5.90E-01 | 0.10  | 6.08E-01 |
| FUT8          | -0.03 | 8.66E-01 | 0.10  | 6.08E-01 |
| POGZ          | -0.17 | 3.75E-01 | 0.10  | 6.08E-01 |
| RPS3AP29      | -0.09 | 6.40E-01 | 0.10  | 6.08E-01 |
| SLC39A9       | 0.27  | 1.67E-01 | 0.10  | 6.08E-01 |
| TBXA2R        | -0.01 | 9.63E-01 | 0.10  | 6.08E-01 |
| THRB          | 0.05  | 8.15E-01 | 0.10  | 6.08E-01 |
| TMEM178A      | -0.29 | 1.31E-01 | 0.10  | 6.08E-01 |

|                |       |          |       |          |
|----------------|-------|----------|-------|----------|
| ZNF8           | 0.04  | 8.24E-01 | 0.10  | 6.08E-01 |
| ENHO           | -0.18 | 3.57E-01 | -0.10 | 6.08E-01 |
| G12735         | -0.22 | 2.66E-01 | -0.10 | 6.08E-01 |
| G32324         | -0.08 | 6.95E-01 | -0.10 | 6.08E-01 |
| LINC01311      | 0.07  | 7.42E-01 | -0.10 | 6.08E-01 |
| MIR593         | -0.02 | 9.39E-01 | -0.10 | 6.08E-01 |
| RP1            | 0.02  | 9.01E-01 | -0.10 | 6.08E-01 |
| RP11-643A5.3   | -0.23 | 2.32E-01 | -0.10 | 6.08E-01 |
| RP11-81M19.3   | -0.07 | 7.15E-01 | -0.10 | 6.08E-01 |
| RP11-84A19.4   | 0.15  | 4.45E-01 | -0.10 | 6.08E-01 |
| SNCB           | 0.00  | 9.87E-01 | -0.10 | 6.08E-01 |
| TIAL1          | -0.10 | 6.26E-01 | -0.10 | 6.08E-01 |
| TOMM34         | 0.20  | 3.08E-01 | -0.10 | 6.08E-01 |
| ZNF207         | 0.18  | 3.56E-01 | -0.10 | 6.08E-01 |
| AP000347.4     | 0.06  | 7.73E-01 | 0.10  | 6.09E-01 |
| CA8            | -0.31 | 1.08E-01 | 0.10  | 6.09E-01 |
| DCTN5          | 0.07  | 7.09E-01 | 0.10  | 6.09E-01 |
| DENND1B        | -0.01 | 9.58E-01 | 0.10  | 6.09E-01 |
| DSG1-AS1       | -0.04 | 8.30E-01 | -0.10 | 6.09E-01 |
| IQCJ-SCHIP1    | 0.08  | 6.76E-01 | 0.10  | 6.09E-01 |
| JMJD8          | -0.03 | 8.94E-01 | 0.10  | 6.09E-01 |
| KCTD5          | 0.23  | 2.30E-01 | 0.10  | 6.09E-01 |
| KIZ-AS1        | -0.15 | 4.41E-01 | -0.10 | 6.09E-01 |
| MCF2           | -0.10 | 6.31E-01 | -0.10 | 6.09E-01 |
| MT-TY          | 0.31  | 1.14E-01 | -0.10 | 6.09E-01 |
| NIPA2          | 0.32  | 9.90E-02 | -0.10 | 6.09E-01 |
| NT5DC1         | 0.29  | 1.36E-01 | 0.10  | 6.09E-01 |
| RAX2           | 0.12  | 5.38E-01 | -0.10 | 6.09E-01 |
| RP11-1149M10.2 | 0.15  | 4.36E-01 | 0.10  | 6.09E-01 |
| RP11-202G18.1  | -0.02 | 9.01E-01 | 0.10  | 6.09E-01 |
| RP11-345J4.5   | -0.17 | 3.79E-01 | 0.10  | 6.09E-01 |
| RP11-700H6.1   | -0.03 | 8.63E-01 | 0.10  | 6.09E-01 |
| RP11-82K18.2   | -0.35 | 7.12E-02 | -0.10 | 6.09E-01 |
| RP3-508I15.22  | 0.18  | 3.48E-01 | -0.10 | 6.09E-01 |
| RP4-675C20.4   | -0.25 | 1.93E-01 | -0.10 | 6.09E-01 |
| RPL7           | 0.08  | 6.91E-01 | -0.10 | 6.09E-01 |
| SH3YL1         | -0.17 | 3.91E-01 | -0.10 | 6.09E-01 |
| SIGMAR1        | 0.14  | 4.90E-01 | 0.10  | 6.09E-01 |
| SMIM10L2B      | -0.33 | 8.29E-02 | -0.10 | 6.09E-01 |
| TMCO3          | -0.01 | 9.67E-01 | 0.10  | 6.09E-01 |
| TPMT           | 0.15  | 4.43E-01 | 0.10  | 6.09E-01 |
| USP32          | 0.13  | 5.01E-01 | 0.10  | 6.09E-01 |
| VTI1B          | -0.15 | 4.52E-01 | 0.10  | 6.09E-01 |
| XLOC_010952    | -0.03 | 8.98E-01 | 0.10  | 6.09E-01 |
| AC004540.4     | 0.02  | 9.15E-01 | 0.10  | 6.10E-01 |
| CEACAM3        | -0.14 | 4.69E-01 | 0.10  | 6.10E-01 |
| COL13A1        | -0.20 | 2.98E-01 | 0.10  | 6.10E-01 |

|               |       |          |       |          |
|---------------|-------|----------|-------|----------|
| FARSA         | 0.27  | 1.72E-01 | 0.10  | 6.10E-01 |
| HPCA          | 0.10  | 6.18E-01 | 0.10  | 6.10E-01 |
| LCE2B         | 0.05  | 8.05E-01 | 0.10  | 6.10E-01 |
| PIGF          | 0.15  | 4.36E-01 | 0.10  | 6.10E-01 |
| RP1-142L7.8   | -0.08 | 7.01E-01 | 0.10  | 6.10E-01 |
| RP1-228P16.7  | -0.06 | 7.62E-01 | 0.10  | 6.10E-01 |
| RP11-219B4.6  | -0.26 | 1.78E-01 | 0.10  | 6.10E-01 |
| RP11-229D13.3 | -0.27 | 1.71E-01 | 0.10  | 6.10E-01 |
| RP11-474P2.7  | -0.12 | 5.46E-01 | 0.10  | 6.10E-01 |
| RP13-884E18.4 | 0.04  | 8.25E-01 | 0.10  | 6.10E-01 |
| RPL18A        | 0.16  | 4.11E-01 | 0.10  | 6.10E-01 |
| SIRT1         | 0.28  | 1.43E-01 | 0.10  | 6.10E-01 |
| Z83001.1      | 0.02  | 9.38E-01 | 0.10  | 6.10E-01 |
| AC018742.1    | -0.05 | 8.16E-01 | -0.10 | 6.10E-01 |
| ADGRB2        | -0.25 | 2.06E-01 | -0.10 | 6.10E-01 |
| ASRGL1        | -0.07 | 7.41E-01 | -0.10 | 6.10E-01 |
| BCRP3         | 0.32  | 9.93E-02 | -0.10 | 6.10E-01 |
| CTC-575I10.1  | -0.20 | 2.97E-01 | -0.10 | 6.10E-01 |
| CUTC          | 0.27  | 1.69E-01 | -0.10 | 6.10E-01 |
| EGLN2         | 0.16  | 4.09E-01 | -0.10 | 6.10E-01 |
| EIF4BP5       | -0.09 | 6.58E-01 | -0.10 | 6.10E-01 |
| FAM27A        | -0.11 | 5.83E-01 | -0.10 | 6.10E-01 |
| IBA57-AS1     | -0.31 | 1.12E-01 | -0.10 | 6.10E-01 |
| KANSL1-AS1    | -0.08 | 6.82E-01 | -0.10 | 6.10E-01 |
| LINC00960     | -0.21 | 2.73E-01 | -0.10 | 6.10E-01 |
| LINC01619     | -0.01 | 9.68E-01 | -0.10 | 6.10E-01 |
| RBPJL         | -0.08 | 6.91E-01 | -0.10 | 6.10E-01 |
| RNU1-16P      | -0.17 | 3.90E-01 | -0.10 | 6.10E-01 |
| RNU6-595P     | 0.15  | 4.33E-01 | -0.10 | 6.10E-01 |
| RP11-352G18.2 | -0.06 | 7.81E-01 | -0.10 | 6.10E-01 |
| RP11-505K9.4  | 0.30  | 1.18E-01 | -0.10 | 6.10E-01 |
| RP11-594N15.3 | -0.32 | 9.36E-02 | -0.10 | 6.10E-01 |
| RP5-1163L11.2 | 0.21  | 2.89E-01 | -0.10 | 6.10E-01 |
| TTC6          | -0.17 | 3.76E-01 | -0.10 | 6.10E-01 |
| AC007249.3    | -0.22 | 2.63E-01 | -0.10 | 6.12E-01 |
| AC058791.1    | 0.11  | 5.87E-01 | -0.10 | 6.12E-01 |
| AC092835.2    | 0.21  | 2.95E-01 | -0.10 | 6.12E-01 |
| AURKAPS1      | -0.05 | 8.07E-01 | -0.10 | 6.12E-01 |
| C6orf183      | -0.06 | 7.78E-01 | -0.10 | 6.12E-01 |
| CHUK          | 0.12  | 5.35E-01 | -0.10 | 6.12E-01 |
| DPM2          | 0.23  | 2.47E-01 | 0.10  | 6.12E-01 |
| EIF3M         | 0.07  | 7.15E-01 | -0.10 | 6.12E-01 |
| ELOVL4        | 0.15  | 4.56E-01 | 0.10  | 6.12E-01 |
| FAM177A1      | 0.03  | 8.95E-01 | -0.10 | 6.12E-01 |
| FAM49A        | 0.05  | 8.03E-01 | -0.10 | 6.12E-01 |
| FASTKD2       | 0.12  | 5.44E-01 | -0.10 | 6.12E-01 |
| FXR1          | -0.18 | 3.71E-01 | 0.10  | 6.12E-01 |

|               |       |          |       |          |
|---------------|-------|----------|-------|----------|
| G1561         | -0.20 | 3.15E-01 | -0.10 | 6.12E-01 |
| G29539        | -0.04 | 8.48E-01 | 0.10  | 6.12E-01 |
| HADH          | 0.36  | 6.01E-02 | -0.10 | 6.12E-01 |
| HTR2B         | -0.27 | 1.72E-01 | -0.10 | 6.12E-01 |
| ICOS          | 0.18  | 3.71E-01 | 0.10  | 6.12E-01 |
| IPO5          | 0.01  | 9.70E-01 | -0.10 | 6.12E-01 |
| IQSEC2        | -0.05 | 8.07E-01 | 0.10  | 6.12E-01 |
| ITGAE         | 0.02  | 9.00E-01 | 0.10  | 6.12E-01 |
| LINC00323     | -0.26 | 1.76E-01 | -0.10 | 6.12E-01 |
| LINC01473     | 0.04  | 8.54E-01 | -0.10 | 6.12E-01 |
| LINC01554     | 0.15  | 4.55E-01 | 0.10  | 6.12E-01 |
| MIR663AHG     | 0.44  | 1.96E-02 | -0.10 | 6.12E-01 |
| NDUF4F4P1     | -0.34 | 7.89E-02 | -0.10 | 6.12E-01 |
| PRNCR1        | 0.21  | 2.90E-01 | -0.10 | 6.12E-01 |
| QDPR          | -0.07 | 7.36E-01 | 0.10  | 6.12E-01 |
| RNA5SP159     | -0.10 | 6.00E-01 | -0.10 | 6.12E-01 |
| RP11-474O21.5 | 0.04  | 8.24E-01 | 0.10  | 6.12E-01 |
| RP11-486A14.1 | 0.18  | 3.60E-01 | -0.10 | 6.12E-01 |
| RP11-556H2.2  | -0.12 | 5.44E-01 | 0.10  | 6.12E-01 |
| RP11-561O23.8 | -0.01 | 9.76E-01 | 0.10  | 6.12E-01 |
| RP11-641D5.1  | -0.13 | 5.04E-01 | 0.10  | 6.12E-01 |
| RP11-667K14.9 | 0.15  | 4.61E-01 | -0.10 | 6.12E-01 |
| RP11-697N18.2 | -0.07 | 7.28E-01 | -0.10 | 6.12E-01 |
| RP11-752D24.2 | -0.12 | 5.34E-01 | -0.10 | 6.12E-01 |
| RP4-550H1.4   | 0.15  | 4.49E-01 | 0.10  | 6.12E-01 |
| SBSPON        | -0.14 | 4.93E-01 | -0.10 | 6.12E-01 |
| SEC22A        | -0.04 | 8.45E-01 | -0.10 | 6.12E-01 |
| SLC51B        | 0.19  | 3.39E-01 | -0.10 | 6.12E-01 |
| SMCO2         | 0.25  | 1.97E-01 | 0.10  | 6.12E-01 |
| TROAP         | 0.12  | 5.35E-01 | 0.10  | 6.12E-01 |
| WIZ           | 0.36  | 6.30E-02 | 0.10  | 6.12E-01 |
| XLOC_000625   | -0.27 | 1.65E-01 | -0.10 | 6.12E-01 |
| XLOC_008522   | -0.07 | 7.27E-01 | 0.10  | 6.12E-01 |
| ZC3H15        | 0.19  | 3.40E-01 | 0.10  | 6.12E-01 |
| ZNF341-AS1    | -0.39 | 3.86E-02 | -0.10 | 6.12E-01 |
| AL132868.1    | 0.00  | 9.92E-01 | -0.10 | 6.13E-01 |
| EIF3B         | 0.16  | 4.06E-01 | -0.10 | 6.13E-01 |
| FBXL13        | -0.17 | 3.75E-01 | -0.10 | 6.13E-01 |
| G39663        | -0.23 | 2.48E-01 | -0.10 | 6.13E-01 |
| MAN2A1        | -0.03 | 8.82E-01 | -0.10 | 6.13E-01 |
| MDC1          | -0.32 | 1.02E-01 | -0.10 | 6.13E-01 |
| REPS2         | -0.20 | 3.16E-01 | -0.10 | 6.13E-01 |
| RP11-252A24.2 | -0.19 | 3.39E-01 | -0.10 | 6.13E-01 |
| RP11-867G23.1 | 0.11  | 5.70E-01 | -0.10 | 6.13E-01 |
| SCART1        | -0.10 | 6.28E-01 | -0.10 | 6.13E-01 |
| TSSC4         | 0.00  | 9.98E-01 | -0.10 | 6.13E-01 |
| UBE2L4        | 0.22  | 2.56E-01 | -0.10 | 6.13E-01 |



|               |       |          |       |          |
|---------------|-------|----------|-------|----------|
| WDR87         | 0.19  | 3.33E-01 | -0.10 | 6.13E-01 |
| XLOC_002066   | 0.23  | 2.34E-01 | -0.10 | 6.13E-01 |
| XLOC_005046   | -0.17 | 3.78E-01 | -0.10 | 6.13E-01 |
| AC004637.1    | 0.05  | 7.96E-01 | 0.10  | 6.13E-01 |
| GS1-393G12.12 | 0.04  | 8.31E-01 | 0.10  | 6.13E-01 |
| HLA-W         | -0.13 | 5.19E-01 | 0.10  | 6.13E-01 |
| MED14         | 0.03  | 8.76E-01 | 0.10  | 6.13E-01 |
| MOAP1         | -0.02 | 9.14E-01 | 0.10  | 6.13E-01 |
| MTCO1P28      | -0.15 | 4.57E-01 | 0.10  | 6.13E-01 |
| MTX1          | -0.04 | 8.43E-01 | 0.10  | 6.13E-01 |
| PPP1CA        | -0.02 | 9.12E-01 | 0.10  | 6.13E-01 |
| RN7SL698P     | -0.02 | 9.15E-01 | 0.10  | 6.13E-01 |
| RNU6-1226P    | -0.38 | 4.71E-02 | 0.10  | 6.13E-01 |
| ROCK1         | 0.05  | 8.16E-01 | 0.10  | 6.13E-01 |
| RP4-800M22.1  | -0.02 | 9.01E-01 | 0.10  | 6.13E-01 |
| SENP3-EIF4A1  | 0.06  | 7.58E-01 | 0.10  | 6.13E-01 |
| SLC6A1        | 0.50  | 6.61E-03 | 0.10  | 6.13E-01 |
| AC093157.1    | 0.09  | 6.55E-01 | -0.10 | 6.14E-01 |
| ACAP2         | -0.06 | 7.62E-01 | -0.10 | 6.14E-01 |
| ACVR2B        | 0.18  | 3.70E-01 | -0.10 | 6.14E-01 |
| ADCK5         | -0.13 | 5.19E-01 | 0.10  | 6.14E-01 |
| CCDC47        | 0.22  | 2.71E-01 | 0.10  | 6.14E-01 |
| CDKN2D        | 0.05  | 8.18E-01 | 0.10  | 6.14E-01 |
| CNTRF-AS1     | -0.05 | 8.17E-01 | -0.10 | 6.14E-01 |
| CSGALNACT2    | 0.03  | 8.64E-01 | -0.10 | 6.14E-01 |
| ETV1          | 0.29  | 1.36E-01 | 0.10  | 6.14E-01 |
| FAM198A       | 0.00  | 9.81E-01 | -0.10 | 6.14E-01 |
| FOXP4-AS1     | 0.00  | 9.81E-01 | -0.10 | 6.14E-01 |
| KIAA1147      | -0.08 | 6.88E-01 | -0.10 | 6.14E-01 |
| MED31         | -0.06 | 7.59E-01 | -0.10 | 6.14E-01 |
| NUTM2A-AS1    | 0.07  | 7.42E-01 | -0.10 | 6.14E-01 |
| POLR2F        | -0.03 | 8.89E-01 | -0.10 | 6.14E-01 |
| RAD51-AS1     | -0.16 | 4.19E-01 | -0.10 | 6.14E-01 |
| RP11-1114A5.4 | 0.30  | 1.19E-01 | -0.10 | 6.14E-01 |
| RP11-175K6.1  | 0.13  | 5.22E-01 | 0.10  | 6.14E-01 |
| RP11-215P8.3  | 0.32  | 9.53E-02 | -0.10 | 6.14E-01 |
| RP11-709A23.2 | -0.04 | 8.21E-01 | -0.10 | 6.14E-01 |
| RP11-884K10.6 | -0.09 | 6.58E-01 | 0.10  | 6.14E-01 |
| RP3-395M20.9  | -0.06 | 7.69E-01 | 0.10  | 6.14E-01 |
| RP5-1174J21.2 | -0.17 | 3.79E-01 | 0.10  | 6.14E-01 |
| SEL1L         | -0.04 | 8.37E-01 | -0.10 | 6.14E-01 |
| SLC2A3        | 0.01  | 9.63E-01 | 0.10  | 6.14E-01 |
| SNRPD1        | 0.09  | 6.50E-01 | -0.10 | 6.14E-01 |
| STEAP3-AS1    | 0.40  | 3.49E-02 | 0.10  | 6.14E-01 |
| TCEA1P2       | 0.11  | 5.78E-01 | 0.10  | 6.14E-01 |
| UBE3B         | -0.28 | 1.48E-01 | 0.10  | 6.14E-01 |
| UQCRHL        | 0.13  | 5.03E-01 | 0.10  | 6.14E-01 |

|               |       |          |       |          |
|---------------|-------|----------|-------|----------|
| VPS33B        | 0.06  | 7.78E-01 | 0.10  | 6.14E-01 |
| XLOC_007868   | -0.04 | 8.24E-01 | 0.10  | 6.14E-01 |
| Z95704.1      | -0.21 | 2.78E-01 | -0.10 | 6.14E-01 |
| ZNF28         | 0.08  | 6.92E-01 | -0.10 | 6.14E-01 |
| ACSL3         | 0.16  | 4.28E-01 | -0.10 | 6.15E-01 |
| CCDC117       | 0.01  | 9.72E-01 | 0.10  | 6.15E-01 |
| CCDC130       | 0.11  | 5.65E-01 | 0.10  | 6.15E-01 |
| CTC-241N9.1   | -0.26 | 1.83E-01 | 0.10  | 6.15E-01 |
| DOCK9         | 0.11  | 5.67E-01 | 0.10  | 6.15E-01 |
| ESR1          | -0.05 | 7.85E-01 | -0.10 | 6.15E-01 |
| FBXO30        | 0.18  | 3.72E-01 | 0.10  | 6.15E-01 |
| FETUB         | 0.16  | 4.02E-01 | -0.10 | 6.15E-01 |
| G35671        | -0.17 | 3.86E-01 | -0.10 | 6.15E-01 |
| G39039        | 0.09  | 6.40E-01 | -0.10 | 6.15E-01 |
| GYG2P1        | 0.32  | 9.65E-02 | 0.10  | 6.15E-01 |
| IDUA          | -0.06 | 7.73E-01 | -0.10 | 6.15E-01 |
| IGHEP1        | -0.16 | 4.08E-01 | -0.10 | 6.15E-01 |
| IL1A          | 0.06  | 7.55E-01 | -0.10 | 6.15E-01 |
| KCNH2         | 0.12  | 5.29E-01 | -0.10 | 6.15E-01 |
| MLF2          | 0.25  | 1.98E-01 | 0.10  | 6.15E-01 |
| MT1H          | -0.04 | 8.30E-01 | -0.10 | 6.15E-01 |
| NBPF20        | 0.00  | 9.99E-01 | -0.10 | 6.15E-01 |
| NLRP1         | 0.16  | 4.08E-01 | 0.10  | 6.15E-01 |
| PCTP          | -0.04 | 8.45E-01 | -0.10 | 6.15E-01 |
| RAD51AP1P1    | 0.05  | 7.83E-01 | -0.10 | 6.15E-01 |
| RNU1-28P      | -0.09 | 6.35E-01 | -0.10 | 6.15E-01 |
| RNU6-1297P    | 0.15  | 4.41E-01 | -0.10 | 6.15E-01 |
| RP11-218M22.1 | 0.00  | 9.97E-01 | -0.10 | 6.15E-01 |
| RP11-526I2.5  | 0.03  | 8.70E-01 | 0.10  | 6.15E-01 |
| RP11-661A12.5 | -0.17 | 4.01E-01 | 0.10  | 6.15E-01 |
| RP11-677M14.6 | 0.09  | 6.47E-01 | 0.10  | 6.15E-01 |
| RP11-734K21.2 | -0.31 | 1.11E-01 | -0.10 | 6.15E-01 |
| RP11-77O7.1   | 0.12  | 5.46E-01 | 0.10  | 6.15E-01 |
| RP11-79M19.2  | -0.10 | 6.25E-01 | -0.10 | 6.15E-01 |
| RP11-968O1.5  | 0.31  | 1.07E-01 | 0.10  | 6.15E-01 |
| RP11-9E17.1   | 0.15  | 4.34E-01 | -0.10 | 6.15E-01 |
| RPS4XP1       | -0.25 | 1.93E-01 | -0.10 | 6.15E-01 |
| SNORA3        | 0.03  | 8.92E-01 | 0.10  | 6.15E-01 |
| SP5           | 0.11  | 5.70E-01 | 0.10  | 6.15E-01 |
| TCF19         | 0.09  | 6.59E-01 | -0.10 | 6.15E-01 |
| TFIP11        | -0.03 | 8.66E-01 | -0.10 | 6.15E-01 |
| TRAV8-2       | 0.26  | 1.85E-01 | 0.10  | 6.15E-01 |
| TSR2          | 0.07  | 7.25E-01 | 0.10  | 6.15E-01 |
| UBA3          | -0.04 | 8.32E-01 | -0.10 | 6.15E-01 |
| ABTB2         | 0.05  | 7.86E-01 | -0.10 | 6.16E-01 |
| AC018462.2    | -0.30 | 1.20E-01 | -0.10 | 6.16E-01 |
| ATG3          | -0.01 | 9.53E-01 | -0.10 | 6.16E-01 |

|                      |       |          |       |          |
|----------------------|-------|----------|-------|----------|
| <b>C19orf18</b>      | -0.14 | 4.66E-01 | -0.10 | 6.16E-01 |
| <b>CTB-147C22.9</b>  | 0.09  | 6.38E-01 | -0.10 | 6.16E-01 |
| <b>GAPDHP47</b>      | -0.18 | 3.55E-01 | -0.10 | 6.16E-01 |
| <b>KRT17P1</b>       | -0.01 | 9.69E-01 | -0.10 | 6.16E-01 |
| <b>RP11-278C7.5</b>  | -0.05 | 8.12E-01 | -0.10 | 6.16E-01 |
| <b>RP11-557H15.4</b> | -0.23 | 2.46E-01 | -0.10 | 6.16E-01 |
| <b>RP3-406A7.5</b>   | 0.42  | 2.64E-02 | -0.10 | 6.16E-01 |
| <b>SCLY</b>          | 0.17  | 3.86E-01 | -0.10 | 6.16E-01 |
| <b>TNFAIP8L3</b>     | -0.17 | 3.87E-01 | -0.10 | 6.16E-01 |
| <b>ZBTB43</b>        | -0.26 | 1.84E-01 | -0.10 | 6.16E-01 |
| <b>ZNF277</b>        | 0.09  | 6.61E-01 | -0.10 | 6.16E-01 |
| <b>AP3S1</b>         | -0.05 | 7.97E-01 | 0.10  | 6.16E-01 |
| <b>C19orf52</b>      | 0.17  | 3.86E-01 | 0.10  | 6.16E-01 |
| <b>CTBP2</b>         | -0.03 | 8.62E-01 | 0.10  | 6.16E-01 |
| <b>EIF4A1P11</b>     | 0.20  | 2.96E-01 | 0.10  | 6.16E-01 |
| <b>HOXA6</b>         | 0.12  | 5.33E-01 | 0.10  | 6.16E-01 |
| <b>ICK</b>           | 0.24  | 2.14E-01 | 0.10  | 6.16E-01 |
| <b>INPPL1</b>        | -0.16 | 4.07E-01 | 0.10  | 6.16E-01 |
| <b>LINC00473</b>     | -0.25 | 1.95E-01 | 0.10  | 6.16E-01 |
| <b>LINC00491</b>     | 0.17  | 3.73E-01 | 0.10  | 6.16E-01 |
| <b>MIR5692C2</b>     | -0.29 | 1.36E-01 | 0.10  | 6.16E-01 |
| <b>MRPS18AP1</b>     | 0.05  | 7.94E-01 | 0.10  | 6.16E-01 |
| <b>PIK3C2B</b>       | -0.12 | 5.57E-01 | 0.10  | 6.16E-01 |
| <b>RNU6-1214P</b>    | -0.28 | 1.53E-01 | 0.10  | 6.16E-01 |
| <b>RP11-154P18.2</b> | -0.38 | 4.71E-02 | 0.10  | 6.16E-01 |
| <b>RP11-243E13.2</b> | -0.24 | 2.18E-01 | 0.10  | 6.16E-01 |
| <b>RP11-284N8.3</b>  | 0.39  | 4.29E-02 | 0.10  | 6.16E-01 |
| <b>RP11-460I13.6</b> | 0.14  | 4.86E-01 | 0.10  | 6.16E-01 |
| <b>RPL3L</b>         | 0.13  | 5.12E-01 | 0.10  | 6.16E-01 |
| <b>RPS4XP16</b>      | 0.26  | 1.75E-01 | 0.10  | 6.16E-01 |
| <b>SCARNA14</b>      | 0.39  | 3.77E-02 | 0.10  | 6.16E-01 |
| <b>SGTA</b>          | 0.30  | 1.16E-01 | 0.10  | 6.16E-01 |
| <b>TEKT1</b>         | -0.01 | 9.60E-01 | 0.10  | 6.16E-01 |
| <b>TTYH1</b>         | 0.03  | 8.63E-01 | 0.10  | 6.16E-01 |
| <b>VPS52</b>         | -0.14 | 4.90E-01 | 0.10  | 6.16E-01 |
| <b>VSTM2L</b>        | -0.24 | 2.12E-01 | 0.10  | 6.16E-01 |
| <b>BMS1P9</b>        | -0.33 | 8.40E-02 | -0.10 | 6.17E-01 |
| <b>CCDC107</b>       | -0.02 | 9.10E-01 | -0.10 | 6.17E-01 |
| <b>COPB1</b>         | 0.07  | 7.23E-01 | -0.10 | 6.17E-01 |
| <b>CTB-147C22.6</b>  | 0.05  | 8.19E-01 | -0.10 | 6.17E-01 |
| <b>CTD-2501E16.2</b> | -0.40 | 3.53E-02 | -0.10 | 6.17E-01 |
| <b>ERVMER61-1</b>    | 0.05  | 7.87E-01 | -0.10 | 6.17E-01 |
| <b>EXOG</b>          | 0.13  | 4.94E-01 | 0.10  | 6.17E-01 |
| <b>FBLIM1</b>        | 0.22  | 2.64E-01 | 0.10  | 6.17E-01 |
| <b>G33828</b>        | 0.24  | 2.27E-01 | -0.10 | 6.17E-01 |
| <b>INF2</b>          | -0.28 | 1.55E-01 | 0.10  | 6.17E-01 |
| <b>LA16c-325D7.1</b> | 0.26  | 1.83E-01 | 0.10  | 6.17E-01 |

|                 |       |          |       |          |
|-----------------|-------|----------|-------|----------|
| LA16c-360A4.1   | -0.32 | 9.99E-02 | 0.10  | 6.17E-01 |
| NUAK2           | -0.16 | 4.24E-01 | -0.10 | 6.17E-01 |
| PLEKHF2         | -0.03 | 8.83E-01 | -0.10 | 6.17E-01 |
| POLR2E          | 0.09  | 6.57E-01 | 0.10  | 6.17E-01 |
| PTMAP1          | -0.16 | 4.26E-01 | 0.10  | 6.17E-01 |
| RP11-165J3.6    | 0.29  | 1.30E-01 | -0.10 | 6.17E-01 |
| RP11-261B23.1   | 0.01  | 9.60E-01 | -0.10 | 6.17E-01 |
| RP11-295P9.6    | 0.19  | 3.26E-01 | 0.10  | 6.17E-01 |
| RP11-402G3.5    | -0.05 | 7.94E-01 | 0.10  | 6.17E-01 |
| RP11-436M15.1   | 0.00  | 9.81E-01 | -0.10 | 6.17E-01 |
| RP11-479I16.2   | -0.04 | 8.39E-01 | -0.10 | 6.17E-01 |
| RP11-840I19.3   | -0.21 | 2.75E-01 | -0.10 | 6.17E-01 |
| RP13-977J11.6   | -0.02 | 9.11E-01 | 0.10  | 6.17E-01 |
| RPS20P22        | -0.12 | 5.58E-01 | 0.10  | 6.17E-01 |
| RSU1            | 0.34  | 7.46E-02 | -0.10 | 6.17E-01 |
| SNORA25         | 0.36  | 6.07E-02 | -0.10 | 6.17E-01 |
| TBX19           | -0.28 | 1.51E-01 | 0.10  | 6.17E-01 |
| TRAJ6           | -0.16 | 4.24E-01 | -0.10 | 6.17E-01 |
| USP38           | 0.23  | 2.48E-01 | 0.10  | 6.17E-01 |
| VILL            | -0.20 | 3.17E-01 | -0.10 | 6.17E-01 |
| WASF3           | -0.09 | 6.67E-01 | -0.10 | 6.17E-01 |
| WBP11           | 0.15  | 4.53E-01 | -0.10 | 6.17E-01 |
| XLOC_005563     | 0.17  | 3.91E-01 | -0.10 | 6.17E-01 |
| XLOC_011789     | -0.48 | 9.42E-03 | -0.10 | 6.17E-01 |
| ACBD3           | -0.05 | 7.83E-01 | -0.10 | 6.18E-01 |
| BTRC            | 0.11  | 5.60E-01 | 0.10  | 6.18E-01 |
| CAB39P1         | 0.13  | 5.14E-01 | -0.10 | 6.18E-01 |
| CDC20P1         | 0.15  | 4.54E-01 | 0.10  | 6.18E-01 |
| CHTOP           | 0.10  | 6.26E-01 | 0.10  | 6.18E-01 |
| DOHH            | 0.17  | 3.81E-01 | -0.10 | 6.18E-01 |
| FLG             | -0.23 | 2.40E-01 | -0.10 | 6.18E-01 |
| GABBR1          | -0.02 | 9.26E-01 | -0.10 | 6.18E-01 |
| JHDM1D-AS1      | 0.28  | 1.56E-01 | 0.10  | 6.18E-01 |
| NPTXR           | -0.14 | 4.72E-01 | -0.10 | 6.18E-01 |
| PLK4            | -0.14 | 4.89E-01 | -0.10 | 6.18E-01 |
| RN7SL230P       | -0.24 | 2.13E-01 | -0.10 | 6.18E-01 |
| RNF114          | 0.14  | 4.72E-01 | 0.10  | 6.18E-01 |
| RP1-102G20.5    | -0.18 | 3.52E-01 | -0.10 | 6.18E-01 |
| RP11-199F11.2   | -0.12 | 5.50E-01 | 0.10  | 6.18E-01 |
| RP11-340C20.3   | 0.03  | 8.86E-01 | -0.10 | 6.18E-01 |
| RP11-408A13.3   | -0.10 | 6.29E-01 | -0.10 | 6.18E-01 |
| RP11-445L13_B.3 | 0.10  | 6.10E-01 | 0.10  | 6.18E-01 |
| RP11-50C13.1    | 0.21  | 2.80E-01 | -0.10 | 6.18E-01 |
| RP11-74J13.8    | 0.00  | 9.98E-01 | -0.10 | 6.18E-01 |
| RP6-109B7.5     | -0.03 | 8.85E-01 | -0.10 | 6.18E-01 |
| RPS7P3          | -0.15 | 4.38E-01 | -0.10 | 6.18E-01 |
| S100A3          | 0.03  | 8.66E-01 | -0.10 | 6.18E-01 |

|               |       |          |       |          |
|---------------|-------|----------|-------|----------|
| SET           | 0.07  | 7.24E-01 | -0.10 | 6.18E-01 |
| TEX38         | 0.01  | 9.69E-01 | -0.10 | 6.18E-01 |
| TGFBI         | -0.05 | 7.86E-01 | -0.10 | 6.18E-01 |
| TRNAI6        | 0.01  | 9.74E-01 | 0.10  | 6.18E-01 |
| TSPAN32       | -0.12 | 5.41E-01 | 0.10  | 6.18E-01 |
| UBXN8         | 0.29  | 1.35E-01 | 0.10  | 6.18E-01 |
| USP16         | 0.04  | 8.43E-01 | -0.10 | 6.18E-01 |
| XLOC_002561   | -0.20 | 3.14E-01 | 0.10  | 6.18E-01 |
| XLOC_007767   | 0.03  | 8.64E-01 | 0.10  | 6.18E-01 |
| CCNB1         | 0.21  | 2.78E-01 | 0.10  | 6.19E-01 |
| CLEC3A        | 0.08  | 6.75E-01 | 0.10  | 6.19E-01 |
| CNNM2         | -0.22 | 2.53E-01 | -0.10 | 6.19E-01 |
| CTD-2026K11.4 | 0.01  | 9.43E-01 | -0.10 | 6.19E-01 |
| CTD-2506J14.1 | 0.25  | 2.02E-01 | 0.10  | 6.19E-01 |
| CTD-2623N2.5  | -0.02 | 9.17E-01 | -0.10 | 6.19E-01 |
| DIAPH3        | 0.07  | 7.09E-01 | -0.10 | 6.19E-01 |
| DNAJC21       | 0.06  | 7.81E-01 | -0.10 | 6.19E-01 |
| FAM127B       | 0.12  | 5.28E-01 | 0.10  | 6.19E-01 |
| FAM66C        | -0.51 | 5.62E-03 | -0.10 | 6.19E-01 |
| G34274        | -0.22 | 2.54E-01 | -0.10 | 6.19E-01 |
| GPR173        | -0.25 | 2.08E-01 | -0.10 | 6.19E-01 |
| HBD           | 0.02  | 9.36E-01 | -0.10 | 6.19E-01 |
| KDM2B         | -0.18 | 3.48E-01 | -0.10 | 6.19E-01 |
| MID1IP1-AS1   | 0.12  | 5.50E-01 | 0.10  | 6.19E-01 |
| MIR1200       | -0.17 | 3.85E-01 | -0.10 | 6.19E-01 |
| MPP5          | 0.22  | 2.71E-01 | 0.10  | 6.19E-01 |
| NPHP3         | 0.12  | 5.42E-01 | -0.10 | 6.19E-01 |
| PAIP1P1       | -0.31 | 1.06E-01 | -0.10 | 6.19E-01 |
| PAM16         | 0.08  | 6.70E-01 | 0.10  | 6.19E-01 |
| PCDHGA5       | -0.05 | 7.98E-01 | 0.10  | 6.19E-01 |
| RGS22         | -0.12 | 5.28E-01 | -0.10 | 6.19E-01 |
| RP11-115D19.1 | -0.05 | 8.04E-01 | 0.10  | 6.19E-01 |
| RP11-536O18.1 | -0.09 | 6.41E-01 | -0.10 | 6.19E-01 |
| RP11-553A21.3 | -0.03 | 8.66E-01 | -0.10 | 6.19E-01 |
| RP5-1107A17.2 | -0.03 | 8.76E-01 | 0.10  | 6.19E-01 |
| RPL23AP36     | 0.15  | 4.32E-01 | -0.10 | 6.19E-01 |
| RPL4P4        | 0.08  | 6.74E-01 | 0.10  | 6.19E-01 |
| RPL5          | 0.03  | 8.73E-01 | -0.10 | 6.19E-01 |
| SLC35E2B      | 0.37  | 4.94E-02 | 0.10  | 6.19E-01 |
| TJP2          | 0.09  | 6.60E-01 | 0.10  | 6.19E-01 |
| USPL1         | -0.11 | 5.94E-01 | -0.10 | 6.19E-01 |
| ZNF32-AS1     | 0.22  | 2.56E-01 | -0.10 | 6.19E-01 |
| AC004840.8    | 0.15  | 4.48E-01 | 0.10  | 6.20E-01 |
| AC092669.3    | -0.25 | 2.01E-01 | -0.10 | 6.20E-01 |
| ACTN1         | 0.15  | 4.56E-01 | 0.10  | 6.20E-01 |
| BAIAP3        | 0.16  | 4.27E-01 | -0.10 | 6.20E-01 |
| CABLES2       | 0.05  | 7.94E-01 | -0.10 | 6.20E-01 |

|                      |       |          |       |          |
|----------------------|-------|----------|-------|----------|
| <b>CEACAMP10</b>     | 0.18  | 3.61E-01 | 0.10  | 6.20E-01 |
| <b>CTTNBP2</b>       | -0.29 | 1.39E-01 | 0.10  | 6.20E-01 |
| <b>DDX18</b>         | 0.04  | 8.55E-01 | -0.10 | 6.20E-01 |
| <b>DENND2C</b>       | -0.02 | 9.39E-01 | -0.10 | 6.20E-01 |
| <b>DERL1</b>         | 0.09  | 6.44E-01 | 0.10  | 6.20E-01 |
| <b>FCF1</b>          | 0.16  | 4.06E-01 | 0.10  | 6.20E-01 |
| <b>GABRB1</b>        | -0.31 | 1.11E-01 | -0.10 | 6.20E-01 |
| <b>GNB2L1</b>        | 0.08  | 6.86E-01 | 0.10  | 6.20E-01 |
| <b>HAUS6P3</b>       | 0.06  | 7.67E-01 | -0.10 | 6.20E-01 |
| <b>MCL1</b>          | 0.34  | 7.39E-02 | 0.10  | 6.20E-01 |
| <b>NCBP2-AS1</b>     | 0.09  | 6.43E-01 | -0.10 | 6.20E-01 |
| <b>PTS</b>           | 0.14  | 4.79E-01 | -0.10 | 6.20E-01 |
| <b>PYHIN1</b>        | 0.43  | 2.30E-02 | 0.10  | 6.20E-01 |
| <b>RN7SL775P</b>     | 0.17  | 3.93E-01 | -0.10 | 6.20E-01 |
| <b>RNF115</b>        | 0.04  | 8.41E-01 | 0.10  | 6.20E-01 |
| <b>RNU6-268P</b>     | -0.41 | 2.84E-02 | 0.10  | 6.20E-01 |
| <b>RNU6-548P</b>     | 0.08  | 6.94E-01 | 0.10  | 6.20E-01 |
| <b>RP11-274B21.2</b> | -0.22 | 2.51E-01 | -0.10 | 6.20E-01 |
| <b>RP11-33E12.2</b>  | 0.00  | 9.94E-01 | -0.10 | 6.20E-01 |
| <b>RP11-386I23.1</b> | 0.03  | 8.94E-01 | 0.10  | 6.20E-01 |
| <b>RP11-477J21.6</b> | -0.23 | 2.30E-01 | -0.10 | 6.20E-01 |
| <b>RP11-516C1.1</b>  | 0.35  | 6.73E-02 | 0.10  | 6.20E-01 |
| <b>RP11-550I24.2</b> | -0.12 | 5.42E-01 | -0.10 | 6.20E-01 |
| <b>RP11-574F11.3</b> | -0.19 | 3.46E-01 | 0.10  | 6.20E-01 |
| <b>RP11-800A18.3</b> | -0.26 | 1.87E-01 | -0.10 | 6.20E-01 |
| <b>RP3-467K16.4</b>  | 0.18  | 3.59E-01 | 0.10  | 6.20E-01 |
| <b>RTCA-AS1</b>      | -0.22 | 2.68E-01 | -0.10 | 6.20E-01 |
| <b>SLAIN2</b>        | 0.05  | 8.10E-01 | -0.10 | 6.20E-01 |
| <b>SLC22A1</b>       | -0.20 | 3.07E-01 | -0.10 | 6.20E-01 |
| <b>STK10</b>         | -0.06 | 7.54E-01 | 0.10  | 6.20E-01 |
| <b>TWIST2</b>        | -0.27 | 1.71E-01 | -0.10 | 6.20E-01 |
| <b>VPS37B</b>        | 0.28  | 1.51E-01 | 0.10  | 6.20E-01 |
| <b>AC055764.1</b>    | 0.01  | 9.43E-01 | 0.10  | 6.21E-01 |
| <b>ALDH5A1</b>       | 0.32  | 9.59E-02 | 0.10  | 6.21E-01 |
| <b>ATPAF2</b>        | 0.09  | 6.37E-01 | -0.10 | 6.21E-01 |
| <b>BCS1L</b>         | -0.09 | 6.48E-01 | 0.10  | 6.21E-01 |
| <b>BIRC3</b>         | 0.14  | 4.76E-01 | 0.10  | 6.21E-01 |
| <b>C14orf142</b>     | 0.07  | 7.37E-01 | 0.10  | 6.21E-01 |
| <b>C2CD4C</b>        | -0.05 | 8.01E-01 | -0.10 | 6.21E-01 |
| <b>CHMP2A</b>        | -0.07 | 7.30E-01 | 0.10  | 6.21E-01 |
| <b>CNN2P1</b>        | -0.17 | 3.96E-01 | -0.10 | 6.21E-01 |
| <b>DZIP3</b>         | -0.09 | 6.32E-01 | -0.10 | 6.21E-01 |
| <b>FAM219A</b>       | -0.03 | 8.85E-01 | 0.10  | 6.21E-01 |
| <b>G34382</b>        | -0.19 | 3.32E-01 | -0.10 | 6.21E-01 |
| <b>KCNH4</b>         | 0.00  | 9.87E-01 | 0.10  | 6.21E-01 |
| <b>LINC01115</b>     | -0.05 | 8.04E-01 | -0.10 | 6.21E-01 |
| <b>MIR26A2</b>       | 0.06  | 7.54E-01 | -0.10 | 6.21E-01 |

|               |       |          |       |          |
|---------------|-------|----------|-------|----------|
| MIR3162       | -0.24 | 2.28E-01 | -0.10 | 6.21E-01 |
| MZB1          | 0.22  | 2.71E-01 | 0.10  | 6.21E-01 |
| NBPF9         | -0.09 | 6.34E-01 | -0.10 | 6.21E-01 |
| NPR1          | -0.25 | 1.91E-01 | 0.10  | 6.21E-01 |
| PIKFYVE       | -0.14 | 4.88E-01 | -0.10 | 6.21E-01 |
| PTGS1         | 0.15  | 4.31E-01 | -0.10 | 6.21E-01 |
| RAPGEF3       | -0.06 | 7.67E-01 | -0.10 | 6.21E-01 |
| RP11-115D19.2 | 0.01  | 9.60E-01 | -0.10 | 6.21E-01 |
| RP11-138B9.1  | 0.11  | 5.80E-01 | -0.10 | 6.21E-01 |
| RP11-405F3.5  | 0.02  | 9.27E-01 | 0.10  | 6.21E-01 |
| RP11-467L13.5 | -0.26 | 1.76E-01 | 0.10  | 6.21E-01 |
| RP11-47G11.2  | 0.14  | 4.81E-01 | -0.10 | 6.21E-01 |
| RP3-425C14.6  | -0.39 | 4.04E-02 | -0.10 | 6.21E-01 |
| RPL36AP43     | -0.34 | 8.05E-02 | 0.10  | 6.21E-01 |
| SH3BP5L       | 0.11  | 5.63E-01 | 0.10  | 6.21E-01 |
| SLC25A36P1    | 0.25  | 1.92E-01 | -0.10 | 6.21E-01 |
| SLCO4A1-AS1   | -0.38 | 4.49E-02 | -0.10 | 6.21E-01 |
| SPEN          | 0.02  | 9.17E-01 | -0.10 | 6.21E-01 |
| TIMMDC1       | 0.27  | 1.63E-01 | 0.10  | 6.21E-01 |
| TMCC1-AS1     | 0.41  | 3.07E-02 | 0.10  | 6.21E-01 |
| ZBTB25        | 0.10  | 6.27E-01 | 0.10  | 6.21E-01 |
| ZFC3H1        | -0.30 | 1.24E-01 | 0.10  | 6.21E-01 |
| ABRACL        | 0.06  | 7.45E-01 | -0.10 | 6.22E-01 |
| AC006026.13   | -0.13 | 5.26E-01 | -0.10 | 6.22E-01 |
| AC025335.1    | -0.20 | 3.04E-01 | -0.10 | 6.22E-01 |
| AC092620.2    | -0.36 | 5.88E-02 | -0.10 | 6.22E-01 |
| ACY1          | 0.45  | 1.53E-02 | 0.10  | 6.22E-01 |
| ATXN1         | 0.08  | 7.04E-01 | 0.10  | 6.22E-01 |
| C16orf58      | -0.01 | 9.46E-01 | 0.10  | 6.22E-01 |
| CCR7          | 0.16  | 4.20E-01 | 0.10  | 6.22E-01 |
| CIR1          | -0.01 | 9.47E-01 | 0.10  | 6.22E-01 |
| DMPK          | -0.08 | 6.74E-01 | 0.10  | 6.22E-01 |
| DNAH1         | -0.16 | 4.12E-01 | -0.10 | 6.22E-01 |
| DYNLT1        | 0.30  | 1.24E-01 | 0.10  | 6.22E-01 |
| ETS2          | -0.09 | 6.40E-01 | 0.10  | 6.22E-01 |
| MIR3126       | 0.17  | 3.96E-01 | 0.10  | 6.22E-01 |
| MIR5706       | -0.18 | 3.70E-01 | -0.10 | 6.22E-01 |
| NKG7          | 0.19  | 3.44E-01 | 0.10  | 6.22E-01 |
| PIN4P1        | -0.18 | 3.49E-01 | 0.10  | 6.22E-01 |
| PSME3         | 0.18  | 3.68E-01 | 0.10  | 6.22E-01 |
| REXO2         | 0.09  | 6.64E-01 | 0.10  | 6.22E-01 |
| RP1-153G14.4  | 0.13  | 5.23E-01 | -0.10 | 6.22E-01 |
| RP1-168P16.2  | 0.45  | 1.62E-02 | 0.10  | 6.22E-01 |
| RP11-299P2.2  | -0.09 | 6.50E-01 | -0.10 | 6.22E-01 |
| RP11-353N4.4  | -0.12 | 5.38E-01 | 0.10  | 6.22E-01 |
| RP11-371A22.1 | -0.08 | 6.77E-01 | 0.10  | 6.22E-01 |
| RP11-66B24.4  | 0.12  | 5.47E-01 | 0.10  | 6.22E-01 |

|                      |       |          |       |          |
|----------------------|-------|----------|-------|----------|
| <b>RP4-545L17.11</b> | 0.02  | 9.09E-01 | 0.10  | 6.22E-01 |
| <b>RPL24P8</b>       | 0.14  | 4.79E-01 | -0.10 | 6.22E-01 |
| <b>RSL1D1</b>        | 0.04  | 8.21E-01 | -0.10 | 6.22E-01 |
| <b>SCN3A</b>         | 0.01  | 9.55E-01 | 0.10  | 6.22E-01 |
| <b>SERPINB9P1</b>    | 0.12  | 5.33E-01 | -0.10 | 6.22E-01 |
| <b>SLC6A16</b>       | 0.16  | 4.03E-01 | -0.10 | 6.22E-01 |
| <b>TAS2R5</b>        | -0.33 | 9.07E-02 | -0.10 | 6.22E-01 |
| <b>TRAF3IP2</b>      | 0.12  | 5.42E-01 | 0.10  | 6.22E-01 |
| <b>VTRNA1-3</b>      | 0.04  | 8.23E-01 | 0.10  | 6.22E-01 |
| <b>YTHDF1</b>        | 0.15  | 4.43E-01 | 0.10  | 6.22E-01 |
| <b>YWHAB</b>         | -0.02 | 9.13E-01 | -0.10 | 6.22E-01 |
| <b>Z97351.1</b>      | -0.07 | 7.37E-01 | -0.10 | 6.22E-01 |
| <b>ZCCHC7</b>        | -0.20 | 3.15E-01 | -0.10 | 6.22E-01 |
| <b>ZNF234</b>        | 0.17  | 3.92E-01 | -0.10 | 6.22E-01 |
| <b>AC005042.2</b>    | -0.14 | 4.67E-01 | 0.10  | 6.23E-01 |
| <b>AC105316.1</b>    | -0.04 | 8.55E-01 | 0.10  | 6.23E-01 |
| <b>AC105381.1</b>    | 0.29  | 1.36E-01 | 0.10  | 6.23E-01 |
| <b>AC140479.1</b>    | -0.11 | 5.86E-01 | 0.10  | 6.23E-01 |
| <b>AGO2</b>          | 0.03  | 8.68E-01 | -0.10 | 6.23E-01 |
| <b>ARSK</b>          | 0.08  | 6.84E-01 | -0.10 | 6.23E-01 |
| <b>CHMP7</b>         | 0.03  | 8.85E-01 | -0.10 | 6.23E-01 |
| <b>CTD-2541J13.1</b> | 0.02  | 9.39E-01 | -0.10 | 6.23E-01 |
| <b>CTGLF11P</b>      | 0.08  | 6.71E-01 | -0.10 | 6.23E-01 |
| <b>IPO11</b>         | -0.02 | 9.32E-01 | -0.10 | 6.23E-01 |
| <b>JRKL</b>          | 0.06  | 7.66E-01 | 0.10  | 6.23E-01 |
| <b>LINC00327</b>     | -0.09 | 6.39E-01 | -0.10 | 6.23E-01 |
| <b>LINC01359</b>     | -0.20 | 3.19E-01 | -0.10 | 6.23E-01 |
| <b>MFSD1</b>         | 0.24  | 2.22E-01 | 0.10  | 6.23E-01 |
| <b>MIR421</b>        | 0.13  | 5.26E-01 | 0.10  | 6.23E-01 |
| <b>OR2A3P</b>        | -0.14 | 4.86E-01 | 0.10  | 6.23E-01 |
| <b>RNA5SP297</b>     | -0.22 | 2.63E-01 | -0.10 | 6.23E-01 |
| <b>RNF144B</b>       | 0.04  | 8.42E-01 | 0.10  | 6.23E-01 |
| <b>RP1-97G4.1</b>    | 0.06  | 7.51E-01 | -0.10 | 6.23E-01 |
| <b>RP11-144F15.1</b> | -0.03 | 8.89E-01 | -0.10 | 6.23E-01 |
| <b>RP11-162G10.5</b> | -0.13 | 5.01E-01 | -0.10 | 6.23E-01 |
| <b>RP11-404P21.6</b> | -0.08 | 6.75E-01 | 0.10  | 6.23E-01 |
| <b>RP11-712P20.2</b> | 0.07  | 7.19E-01 | -0.10 | 6.23E-01 |
| <b>RP11-734K21.5</b> | -0.12 | 5.32E-01 | -0.10 | 6.23E-01 |
| <b>RTCB</b>          | 0.19  | 3.42E-01 | 0.10  | 6.23E-01 |
| <b>SERPINB5</b>      | -0.19 | 3.24E-01 | -0.10 | 6.23E-01 |
| <b>SOS2</b>          | 0.10  | 6.20E-01 | -0.10 | 6.23E-01 |
| <b>STMND1</b>        | -0.18 | 3.68E-01 | 0.10  | 6.23E-01 |
| <b>TRMT44</b>        | 0.26  | 1.90E-01 | -0.10 | 6.23E-01 |
| <b>UTP14C</b>        | 0.22  | 2.66E-01 | -0.10 | 6.23E-01 |
| <b>WDR89</b>         | 0.16  | 4.29E-01 | -0.10 | 6.23E-01 |
| <b>WFDC2</b>         | 0.13  | 5.25E-01 | -0.10 | 6.23E-01 |
| <b>XLOC_012288</b>   | -0.04 | 8.43E-01 | 0.10  | 6.23E-01 |



|                |       |          |       |          |
|----------------|-------|----------|-------|----------|
| AC009159.1     | -0.15 | 4.39E-01 | 0.10  | 6.24E-01 |
| AC016712.1     | 0.02  | 9.22E-01 | -0.10 | 6.24E-01 |
| AC079781.8     | -0.27 | 1.63E-01 | -0.10 | 6.24E-01 |
| ALKBH6         | 0.15  | 4.42E-01 | -0.10 | 6.24E-01 |
| BORCS7         | 0.24  | 2.15E-01 | -0.10 | 6.24E-01 |
| CHM            | 0.00  | 9.87E-01 | 0.10  | 6.24E-01 |
| CTC-786C10.1   | 0.16  | 4.04E-01 | 0.10  | 6.24E-01 |
| CTD-2616J11.16 | 0.09  | 6.55E-01 | 0.10  | 6.24E-01 |
| EIF4A2         | -0.12 | 5.46E-01 | -0.10 | 6.24E-01 |
| ERICH2         | 0.10  | 5.95E-01 | -0.10 | 6.24E-01 |
| FAAH           | -0.01 | 9.59E-01 | 0.10  | 6.24E-01 |
| GEMIN2         | -0.08 | 6.77E-01 | -0.10 | 6.24E-01 |
| KLHL23         | 0.00  | 9.99E-01 | -0.10 | 6.24E-01 |
| MAP3K1         | 0.34  | 7.39E-02 | 0.10  | 6.24E-01 |
| MTND4LP7       | -0.34 | 7.97E-02 | 0.10  | 6.24E-01 |
| OR7E13P        | -0.40 | 3.47E-02 | 0.10  | 6.24E-01 |
| PHBP9          | -0.09 | 6.58E-01 | -0.10 | 6.24E-01 |
| PPP2R2A        | 0.11  | 5.74E-01 | 0.10  | 6.24E-01 |
| PTPRS          | -0.09 | 6.42E-01 | -0.10 | 6.24E-01 |
| RAB7A          | 0.12  | 5.57E-01 | 0.10  | 6.24E-01 |
| RN7SKP269      | 0.16  | 4.20E-01 | 0.10  | 6.24E-01 |
| RN7SL753P      | 0.01  | 9.61E-01 | 0.10  | 6.24E-01 |
| RP11-109G23.3  | -0.02 | 9.05E-01 | -0.10 | 6.24E-01 |
| RP11-147L13.7  | 0.01  | 9.63E-01 | -0.10 | 6.24E-01 |
| RP11-210K20.6  | -0.11 | 5.69E-01 | -0.10 | 6.24E-01 |
| RP11-426J5.2   | 0.02  | 9.34E-01 | 0.10  | 6.24E-01 |
| RP11-77G23.5   | 0.01  | 9.46E-01 | -0.10 | 6.24E-01 |
| RP3-453I5.2    | 0.17  | 3.82E-01 | 0.10  | 6.24E-01 |
| RPRD1A         | 0.19  | 3.36E-01 | -0.10 | 6.24E-01 |
| RPS27A         | 0.18  | 3.56E-01 | -0.10 | 6.24E-01 |
| RPS7P15        | -0.30 | 1.21E-01 | 0.10  | 6.24E-01 |
| SNORD70        | -0.03 | 8.74E-01 | -0.10 | 6.24E-01 |
| TAS2R15P       | 0.03  | 8.65E-01 | -0.10 | 6.24E-01 |
| TPM3P7         | -0.05 | 8.05E-01 | -0.10 | 6.24E-01 |
| UBE2Q2P1       | -0.27 | 1.64E-01 | 0.10  | 6.24E-01 |
| ZNF385D-AS1    | -0.04 | 8.23E-01 | -0.10 | 6.24E-01 |
| DLG3-AS1       | 0.06  | 7.68E-01 | -0.10 | 6.26E-01 |
| GAS8           | -0.22 | 2.62E-01 | -0.10 | 6.26E-01 |
| LCTL           | -0.11 | 5.61E-01 | -0.10 | 6.26E-01 |
| NPTN-IT1       | -0.18 | 3.52E-01 | -0.10 | 6.26E-01 |
| OSBP2          | 0.21  | 2.79E-01 | -0.10 | 6.26E-01 |
| PEPD           | -0.09 | 6.42E-01 | -0.10 | 6.26E-01 |
| PRKG1          | -0.10 | 6.07E-01 | -0.10 | 6.26E-01 |
| PRKRIR         | 0.08  | 6.89E-01 | -0.10 | 6.26E-01 |
| RP11-1277A3.1  | -0.07 | 7.29E-01 | -0.10 | 6.26E-01 |
| RP11-266O8.1   | 0.20  | 3.16E-01 | -0.10 | 6.26E-01 |
| RP11-357N13.1  | -0.46 | 1.37E-02 | -0.10 | 6.26E-01 |

|               |       |          |       |          |
|---------------|-------|----------|-------|----------|
| RP11-428P16.2 | -0.19 | 3.44E-01 | -0.10 | 6.26E-01 |
| RP11-430B1.1  | -0.10 | 6.18E-01 | -0.10 | 6.26E-01 |
| RP11-452K12.4 | 0.47  | 1.09E-02 | -0.10 | 6.26E-01 |
| RP4-591N18.2  | -0.17 | 3.91E-01 | -0.10 | 6.26E-01 |
| SESTD1        | -0.19 | 3.24E-01 | -0.10 | 6.26E-01 |
| SMIM22        | 0.00  | 9.94E-01 | -0.10 | 6.26E-01 |
| XLOC_014104   | -0.40 | 3.35E-02 | -0.10 | 6.26E-01 |
| BPIFC         | 0.04  | 8.52E-01 | 0.10  | 6.26E-01 |
| CTB-46B19.2   | 0.33  | 9.12E-02 | 0.10  | 6.26E-01 |
| DKFZP434H168  | 0.02  | 9.11E-01 | 0.10  | 6.26E-01 |
| EEF1D         | 0.13  | 5.22E-01 | 0.10  | 6.26E-01 |
| KCP           | -0.01 | 9.59E-01 | 0.10  | 6.26E-01 |
| KIAA1033      | 0.33  | 8.75E-02 | 0.10  | 6.26E-01 |
| KIZ           | -0.11 | 5.74E-01 | 0.10  | 6.26E-01 |
| MARCKSL1      | 0.02  | 9.33E-01 | 0.10  | 6.26E-01 |
| NBEAP1        | 0.10  | 6.04E-01 | 0.10  | 6.26E-01 |
| NHP2P1        | 0.05  | 8.13E-01 | 0.10  | 6.26E-01 |
| NSRP1P1       | -0.16 | 4.16E-01 | 0.10  | 6.26E-01 |
| RP11-295D4.5  | 0.03  | 8.68E-01 | 0.10  | 6.26E-01 |
| RP11-327E2.5  | -0.01 | 9.79E-01 | 0.10  | 6.26E-01 |
| RP11-415F23.4 | 0.03  | 8.85E-01 | 0.10  | 6.26E-01 |
| RP11-467D6.1  | -0.04 | 8.23E-01 | 0.10  | 6.26E-01 |
| SELENBP1      | -0.24 | 2.24E-01 | 0.10  | 6.26E-01 |
| SRL           | 0.02  | 9.00E-01 | 0.10  | 6.26E-01 |
| TPI1P3        | 0.18  | 3.63E-01 | 0.10  | 6.26E-01 |
| ZHX1          | 0.13  | 5.12E-01 | 0.10  | 6.26E-01 |
| ZNF75D        | -0.03 | 8.65E-01 | 0.10  | 6.26E-01 |
| AC083843.4    | 0.04  | 8.37E-01 | -0.10 | 6.27E-01 |
| AHSA2         | -0.11 | 5.76E-01 | -0.10 | 6.27E-01 |
| C14orf166     | -0.10 | 6.28E-01 | -0.10 | 6.27E-01 |
| CTA-113A6.2   | -0.09 | 6.62E-01 | -0.10 | 6.27E-01 |
| CTD-2373J6.2  | -0.10 | 6.29E-01 | -0.10 | 6.27E-01 |
| EP300-AS1     | 0.05  | 7.89E-01 | 0.10  | 6.27E-01 |
| FBXO11        | 0.13  | 5.19E-01 | -0.10 | 6.27E-01 |
| KCNIP2        | -0.23 | 2.32E-01 | -0.10 | 6.27E-01 |
| LINC00636     | -0.05 | 7.97E-01 | 0.10  | 6.27E-01 |
| LINC01278     | 0.20  | 2.99E-01 | -0.10 | 6.27E-01 |
| MEIS3P2       | -0.06 | 7.69E-01 | -0.10 | 6.27E-01 |
| MMGT1         | 0.02  | 9.04E-01 | -0.10 | 6.27E-01 |
| MTMR11        | -0.23 | 2.29E-01 | -0.10 | 6.27E-01 |
| Metazoa_SRP   | 0.31  | 1.04E-01 | -0.10 | 6.27E-01 |
| NDUFS5        | 0.05  | 7.88E-01 | 0.10  | 6.27E-01 |
| PLS1          | 0.32  | 9.84E-02 | -0.10 | 6.27E-01 |
| PYCR1         | 0.15  | 4.32E-01 | 0.10  | 6.27E-01 |
| RAD17P2       | -0.10 | 6.23E-01 | -0.10 | 6.27E-01 |
| RASGRP3       | -0.15 | 4.59E-01 | 0.10  | 6.27E-01 |
| RASSF6        | -0.01 | 9.50E-01 | -0.10 | 6.27E-01 |

|                      |       |          |       |          |
|----------------------|-------|----------|-------|----------|
| <b>RNY4</b>          | 0.24  | 2.20E-01 | -0.10 | 6.27E-01 |
| <b>RP11-264L1.4</b>  | 0.13  | 5.20E-01 | 0.10  | 6.27E-01 |
| <b>RP11-326C3.7</b>  | -0.02 | 9.01E-01 | 0.10  | 6.27E-01 |
| <b>RP11-434E6.2</b>  | -0.12 | 5.48E-01 | -0.10 | 6.27E-01 |
| <b>RP11-511I11.2</b> | -0.11 | 5.90E-01 | -0.10 | 6.27E-01 |
| <b>RP11-61K9.3</b>   | 0.25  | 1.92E-01 | 0.10  | 6.27E-01 |
| <b>RP11-787D18.1</b> | -0.03 | 8.65E-01 | 0.10  | 6.27E-01 |
| <b>RP11-996F15.4</b> | 0.11  | 5.68E-01 | 0.10  | 6.27E-01 |
| <b>RP5-1116H23.4</b> | -0.22 | 2.59E-01 | -0.10 | 6.27E-01 |
| <b>RP5-875H18.9</b>  | -0.01 | 9.42E-01 | -0.10 | 6.27E-01 |
| <b>RSF1</b>          | -0.23 | 2.50E-01 | -0.10 | 6.27E-01 |
| <b>SLC25A5P1</b>     | -0.42 | 2.75E-02 | 0.10  | 6.27E-01 |
| <b>TPT1-AS1</b>      | -0.43 | 2.26E-02 | -0.10 | 6.27E-01 |
| <b>VWCE</b>          | -0.23 | 2.43E-01 | -0.10 | 6.27E-01 |
| <b>XCL1</b>          | 0.11  | 5.67E-01 | 0.10  | 6.27E-01 |
| <b>ZNF99</b>         | 0.00  | 9.81E-01 | -0.10 | 6.27E-01 |
| <b>ZZZ3</b>          | 0.02  | 9.04E-01 | -0.10 | 6.27E-01 |
| <b>AC008671.1</b>    | -0.14 | 4.84E-01 | -0.10 | 6.28E-01 |
| <b>ADAMTS8</b>       | -0.37 | 5.16E-02 | -0.10 | 6.28E-01 |
| <b>ARPC5</b>         | 0.11  | 5.65E-01 | -0.10 | 6.28E-01 |
| <b>CARF</b>          | -0.12 | 5.47E-01 | 0.10  | 6.28E-01 |
| <b>CHMP4A</b>        | 0.15  | 4.31E-01 | -0.10 | 6.28E-01 |
| <b>CMSS1</b>         | -0.04 | 8.32E-01 | -0.10 | 6.28E-01 |
| <b>CTC-571O20.1</b>  | 0.21  | 2.94E-01 | -0.10 | 6.28E-01 |
| <b>CTD-2376I20.1</b> | -0.14 | 4.82E-01 | 0.10  | 6.28E-01 |
| <b>EMCN</b>          | -0.11 | 5.81E-01 | -0.10 | 6.28E-01 |
| <b>FAM86JP</b>       | 0.33  | 8.24E-02 | 0.10  | 6.28E-01 |
| <b>FXD2</b>          | 0.11  | 5.88E-01 | -0.10 | 6.28E-01 |
| <b>G12855</b>        | -0.02 | 9.08E-01 | 0.10  | 6.28E-01 |
| <b>GOLGA4</b>        | -0.02 | 9.12E-01 | -0.10 | 6.28E-01 |
| <b>HHLA3</b>         | -0.15 | 4.40E-01 | 0.10  | 6.28E-01 |
| <b>KLF7-IT1</b>      | 0.02  | 9.12E-01 | 0.10  | 6.28E-01 |
| <b>NOP14</b>         | 0.14  | 4.66E-01 | -0.10 | 6.28E-01 |
| <b>NPHP4</b>         | -0.06 | 7.60E-01 | -0.10 | 6.28E-01 |
| <b>NRGN</b>          | 0.16  | 4.06E-01 | 0.10  | 6.28E-01 |
| <b>OIP5</b>          | 0.08  | 6.82E-01 | 0.10  | 6.28E-01 |
| <b>OTUB1</b>         | 0.17  | 3.88E-01 | 0.10  | 6.28E-01 |
| <b>PCOLCE2</b>       | -0.36 | 5.68E-02 | 0.10  | 6.28E-01 |
| <b>POP5</b>          | 0.14  | 4.72E-01 | 0.10  | 6.28E-01 |
| <b>RN7SL650P</b>     | -0.08 | 6.80E-01 | 0.10  | 6.28E-01 |
| <b>RP11-110I1.11</b> | -0.02 | 9.02E-01 | -0.10 | 6.28E-01 |
| <b>RP11-27M24.2</b>  | -0.14 | 4.86E-01 | -0.10 | 6.28E-01 |
| <b>RP11-390G14.1</b> | -0.39 | 4.01E-02 | -0.10 | 6.28E-01 |
| <b>RP11-397P13.7</b> | 0.19  | 3.41E-01 | -0.10 | 6.28E-01 |
| <b>RP11-673E1.1</b>  | 0.02  | 9.06E-01 | 0.10  | 6.28E-01 |
| <b>RP11-730K11.1</b> | -0.13 | 4.95E-01 | -0.10 | 6.28E-01 |
| <b>RP11-770J1.7</b>  | 0.12  | 5.57E-01 | -0.10 | 6.28E-01 |

|                 |       |          |       |          |
|-----------------|-------|----------|-------|----------|
| RPL7AP65        | -0.39 | 4.07E-02 | -0.10 | 6.28E-01 |
| SNORD114-20     | -0.27 | 1.59E-01 | -0.10 | 6.28E-01 |
| TCFL5           | -0.06 | 7.68E-01 | -0.10 | 6.28E-01 |
| TEX26-AS1       | -0.13 | 5.19E-01 | -0.10 | 6.28E-01 |
| VDAC2           | 0.20  | 3.17E-01 | -0.10 | 6.28E-01 |
| XLOC_008785     | -0.05 | 8.09E-01 | -0.10 | 6.28E-01 |
| XXbac-B135H6.15 | -0.18 | 3.50E-01 | 0.10  | 6.28E-01 |
| ZNF830          | 0.05  | 8.15E-01 | -0.10 | 6.28E-01 |
| AF131215.1      | -0.01 | 9.71E-01 | -0.10 | 6.29E-01 |
| ARHGAP23        | 0.23  | 2.43E-01 | -0.10 | 6.29E-01 |
| BICC1           | -0.37 | 5.33E-02 | -0.10 | 6.29E-01 |
| C5orf42         | -0.16 | 4.06E-01 | 0.10  | 6.29E-01 |
| CACYBPP2        | 0.00  | 9.85E-01 | -0.10 | 6.29E-01 |
| CBWD3           | -0.07 | 7.32E-01 | -0.10 | 6.29E-01 |
| CCDC73          | -0.30 | 1.20E-01 | -0.10 | 6.29E-01 |
| CD300LB         | -0.19 | 3.31E-01 | -0.10 | 6.29E-01 |
| CDK5RAP3        | -0.12 | 5.53E-01 | -0.10 | 6.29E-01 |
| CDX4            | 0.01  | 9.53E-01 | 0.10  | 6.29E-01 |
| CTD-2026D20.2   | -0.18 | 3.67E-01 | 0.10  | 6.29E-01 |
| CTD-2587H19.3   | -0.19 | 3.45E-01 | -0.10 | 6.29E-01 |
| FUOM            | -0.05 | 8.16E-01 | 0.10  | 6.29E-01 |
| G18345          | 0.11  | 5.64E-01 | 0.10  | 6.29E-01 |
| G34171          | -0.24 | 2.11E-01 | 0.10  | 6.29E-01 |
| G34929          | 0.13  | 4.97E-01 | 0.10  | 6.29E-01 |
| HIGD1B          | -0.36 | 5.70E-02 | 0.10  | 6.29E-01 |
| HSPA8P15        | 0.20  | 3.19E-01 | -0.10 | 6.29E-01 |
| IPO9            | 0.02  | 9.37E-01 | -0.10 | 6.29E-01 |
| MAPK10          | 0.02  | 9.31E-01 | 0.10  | 6.29E-01 |
| MED9            | 0.15  | 4.60E-01 | 0.10  | 6.29E-01 |
| MIR604          | 0.01  | 9.76E-01 | 0.10  | 6.29E-01 |
| NAPB            | -0.20 | 3.03E-01 | -0.10 | 6.29E-01 |
| PCDHB15         | -0.19 | 3.39E-01 | -0.10 | 6.29E-01 |
| PPP6R3          | 0.18  | 3.64E-01 | -0.10 | 6.29E-01 |
| RAB3C           | 0.06  | 7.67E-01 | -0.10 | 6.29E-01 |
| RFX3-AS1        | 0.00  | 9.83E-01 | -0.10 | 6.29E-01 |
| RIC8A           | 0.01  | 9.40E-01 | 0.10  | 6.29E-01 |
| RN7SL21P        | 0.04  | 8.59E-01 | -0.10 | 6.29E-01 |
| RNU1-63P        | 0.13  | 4.96E-01 | 0.10  | 6.29E-01 |
| RNU6-470P       | 0.09  | 6.34E-01 | -0.10 | 6.29E-01 |
| RP11-206L10.8   | 0.04  | 8.46E-01 | -0.10 | 6.29E-01 |
| RP11-339B21.10  | 0.05  | 8.07E-01 | 0.10  | 6.29E-01 |
| RP11-357D18.1   | 0.01  | 9.74E-01 | 0.10  | 6.29E-01 |
| RP11-395N3.1    | -0.28 | 1.49E-01 | -0.10 | 6.29E-01 |
| RP11-442G21.2   | 0.06  | 7.80E-01 | 0.10  | 6.29E-01 |
| RP11-46I1.1     | 0.01  | 9.79E-01 | 0.10  | 6.29E-01 |
| RP11-512N21.3   | 0.32  | 9.87E-02 | 0.10  | 6.29E-01 |
| RP11-52A20.2    | -0.23 | 2.37E-01 | 0.10  | 6.29E-01 |

|                |       |          |       |          |
|----------------|-------|----------|-------|----------|
| RP11-97N19.2   | 0.21  | 2.88E-01 | 0.10  | 6.29E-01 |
| RP5-1042K10.12 | 0.01  | 9.79E-01 | -0.10 | 6.29E-01 |
| RWDD2A         | -0.31 | 1.13E-01 | 0.10  | 6.29E-01 |
| SP3            | 0.11  | 5.65E-01 | -0.10 | 6.29E-01 |
| TBC1D5         | -0.09 | 6.66E-01 | -0.10 | 6.29E-01 |
| TCP11          | 0.25  | 1.97E-01 | 0.10  | 6.29E-01 |
| TGFB3          | -0.32 | 1.00E-01 | 0.10  | 6.29E-01 |
| TIMM9          | -0.12 | 5.41E-01 | -0.10 | 6.29E-01 |
| TLK2P1         | 0.06  | 7.72E-01 | 0.10  | 6.29E-01 |
| TMEM100        | 0.24  | 2.27E-01 | -0.10 | 6.29E-01 |
| TMEM61         | -0.16 | 4.24E-01 | 0.10  | 6.29E-01 |
| U8             | -0.15 | 4.49E-01 | -0.10 | 6.29E-01 |
| UBA6-AS1       | 0.12  | 5.32E-01 | 0.10  | 6.29E-01 |
| ZFAND1         | 0.28  | 1.54E-01 | -0.10 | 6.29E-01 |
| AC079305.10    | 0.20  | 3.11E-01 | -0.10 | 6.30E-01 |
| AC092641.2     | 0.05  | 8.01E-01 | 0.10  | 6.30E-01 |
| ADAMTS18       | -0.06 | 7.58E-01 | 0.10  | 6.30E-01 |
| AFG3L2         | 0.16  | 4.24E-01 | -0.10 | 6.30E-01 |
| AGO1           | 0.08  | 6.75E-01 | 0.10  | 6.30E-01 |
| ATF3           | -0.22 | 2.56E-01 | 0.10  | 6.30E-01 |
| ATP6V1A        | 0.25  | 1.92E-01 | 0.10  | 6.30E-01 |
| BAZ1A          | 0.27  | 1.63E-01 | 0.10  | 6.30E-01 |
| CABYR          | -0.24 | 2.21E-01 | 0.10  | 6.30E-01 |
| CDCA7L         | 0.03  | 8.69E-01 | -0.10 | 6.30E-01 |
| CNOT1          | 0.06  | 7.78E-01 | 0.10  | 6.30E-01 |
| DHPS           | -0.25 | 1.99E-01 | 0.10  | 6.30E-01 |
| FBXO15         | 0.13  | 4.98E-01 | 0.10  | 6.30E-01 |
| FCGR2C         | 0.09  | 6.50E-01 | 0.10  | 6.30E-01 |
| G230           | -0.02 | 9.15E-01 | 0.10  | 6.30E-01 |
| GS1-358P8.4    | 0.14  | 4.79E-01 | 0.10  | 6.30E-01 |
| HERC5          | 0.25  | 2.00E-01 | 0.10  | 6.30E-01 |
| INTS4P2        | 0.16  | 4.19E-01 | -0.10 | 6.30E-01 |
| JADE3          | 0.12  | 5.54E-01 | -0.10 | 6.30E-01 |
| LATS1          | -0.11 | 5.69E-01 | -0.10 | 6.30E-01 |
| LINC00324      | -0.05 | 7.86E-01 | 0.10  | 6.30E-01 |
| MIR505         | -0.05 | 8.07E-01 | 0.10  | 6.30E-01 |
| MTR            | 0.06  | 7.47E-01 | -0.10 | 6.30E-01 |
| NGF            | -0.03 | 8.87E-01 | -0.10 | 6.30E-01 |
| RNASSET2       | 0.48  | 9.70E-03 | 0.10  | 6.30E-01 |
| RNF32          | -0.14 | 4.88E-01 | -0.10 | 6.30E-01 |
| RNU6-282P      | 0.08  | 7.00E-01 | 0.10  | 6.30E-01 |
| RNVU1-13       | -0.14 | 4.66E-01 | -0.10 | 6.30E-01 |
| RP11-126L15.4  | -0.01 | 9.47E-01 | 0.10  | 6.30E-01 |
| RP11-1336O20.2 | 0.00  | 9.90E-01 | -0.10 | 6.30E-01 |
| RP11-242D8.1   | -0.38 | 4.85E-02 | -0.10 | 6.30E-01 |
| RP11-421E14.2  | -0.15 | 4.37E-01 | -0.10 | 6.30E-01 |
| RP11-597D13.9  | -0.26 | 1.82E-01 | 0.10  | 6.30E-01 |

|                |       |          |       |          |
|----------------|-------|----------|-------|----------|
| RP11-677M14.2  | 0.23  | 2.35E-01 | -0.10 | 6.30E-01 |
| RP11-69E11.8   | 0.20  | 3.06E-01 | -0.10 | 6.30E-01 |
| RP11-707O23.5  | 0.09  | 6.54E-01 | 0.10  | 6.30E-01 |
| SEZ6           | 0.07  | 7.40E-01 | 0.10  | 6.30E-01 |
| SIAH2          | 0.18  | 3.67E-01 | 0.10  | 6.30E-01 |
| SLC26A10       | -0.25 | 2.07E-01 | -0.10 | 6.30E-01 |
| STARD13-IT1    | -0.02 | 9.24E-01 | 0.10  | 6.30E-01 |
| TBRG4          | 0.04  | 8.56E-01 | 0.10  | 6.30E-01 |
| TMED9          | 0.17  | 3.75E-01 | 0.10  | 6.30E-01 |
| ZMAT1          | -0.24 | 2.14E-01 | -0.10 | 6.30E-01 |
| AC116614.1     | -0.02 | 9.27E-01 | -0.10 | 6.31E-01 |
| BIRC6-AS2      | 0.13  | 5.10E-01 | -0.10 | 6.31E-01 |
| BTF3L4P1       | 0.07  | 7.19E-01 | 0.10  | 6.31E-01 |
| DPF3           | -0.03 | 8.92E-01 | 0.10  | 6.31E-01 |
| EWSR1          | 0.11  | 5.75E-01 | 0.10  | 6.31E-01 |
| FAM161A        | -0.09 | 6.35E-01 | -0.10 | 6.31E-01 |
| LILRA6         | 0.06  | 7.81E-01 | 0.10  | 6.31E-01 |
| LINC01290      | -0.18 | 3.52E-01 | -0.10 | 6.31E-01 |
| MALSU1         | 0.13  | 5.20E-01 | 0.10  | 6.31E-01 |
| RBBP4P1        | -0.31 | 1.04E-01 | 0.10  | 6.31E-01 |
| RP11-110H1.4   | 0.22  | 2.67E-01 | -0.10 | 6.31E-01 |
| RP11-278J6.4   | -0.37 | 5.01E-02 | -0.10 | 6.31E-01 |
| RP11-439L18.1  | -0.10 | 5.98E-01 | 0.10  | 6.31E-01 |
| RP11-473M20.16 | 0.20  | 3.08E-01 | 0.10  | 6.31E-01 |
| RP11-474P2.6   | -0.32 | 9.45E-02 | -0.10 | 6.31E-01 |
| RP11-709D24.6  | 0.00  | 1.00E+00 | -0.10 | 6.31E-01 |
| RRAGA          | 0.27  | 1.60E-01 | 0.10  | 6.31E-01 |
| SCARNA23       | 0.06  | 7.72E-01 | 0.10  | 6.31E-01 |
| SOX17          | -0.40 | 3.28E-02 | 0.10  | 6.31E-01 |
| UBQLN2         | 0.12  | 5.28E-01 | 0.10  | 6.31E-01 |
| UFC1           | -0.01 | 9.60E-01 | 0.10  | 6.31E-01 |
| XLOC_001200    | -0.15 | 4.51E-01 | -0.10 | 6.31E-01 |
| AC026904.1     | 0.40  | 3.65E-02 | 0.10  | 6.32E-01 |
| AD001527.7     | 0.29  | 1.28E-01 | 0.10  | 6.32E-01 |
| ADRBK2         | -0.01 | 9.59E-01 | 0.10  | 6.32E-01 |
| ATP7A          | 0.05  | 7.94E-01 | -0.10 | 6.32E-01 |
| CACNA1F        | 0.01  | 9.50E-01 | 0.10  | 6.32E-01 |
| CCDC18         | 0.15  | 4.40E-01 | -0.10 | 6.32E-01 |
| CDC37          | 0.19  | 3.22E-01 | 0.10  | 6.32E-01 |
| DDX39B         | -0.12 | 5.59E-01 | -0.10 | 6.32E-01 |
| ERAP2          | 0.10  | 6.02E-01 | -0.10 | 6.32E-01 |
| FAM120B        | -0.03 | 8.62E-01 | 0.10  | 6.32E-01 |
| FANCG          | -0.09 | 6.57E-01 | -0.10 | 6.32E-01 |
| GPS1           | 0.09  | 6.60E-01 | 0.10  | 6.32E-01 |
| KARS           | 0.02  | 9.21E-01 | -0.10 | 6.32E-01 |
| KRTAP10-11     | -0.23 | 2.29E-01 | -0.10 | 6.32E-01 |
| KRTAP4-7       | -0.24 | 2.15E-01 | 0.10  | 6.32E-01 |

|                |       |          |       |          |
|----------------|-------|----------|-------|----------|
| MIR4319        | -0.03 | 8.94E-01 | -0.10 | 6.32E-01 |
| MIR643         | -0.05 | 8.13E-01 | -0.10 | 6.32E-01 |
| NID2           | -0.05 | 8.07E-01 | 0.10  | 6.32E-01 |
| OLFML2B        | -0.23 | 2.37E-01 | 0.10  | 6.32E-01 |
| PICALM         | 0.26  | 1.80E-01 | 0.10  | 6.32E-01 |
| PKP3           | 0.01  | 9.79E-01 | 0.10  | 6.32E-01 |
| PPP1R14B       | 0.00  | 9.86E-01 | -0.10 | 6.32E-01 |
| PRKAG1         | 0.16  | 4.09E-01 | 0.10  | 6.32E-01 |
| PXK            | 0.13  | 5.01E-01 | -0.10 | 6.32E-01 |
| RAD54B         | 0.12  | 5.59E-01 | -0.10 | 6.32E-01 |
| RP11-1094M14.5 | 0.01  | 9.53E-01 | 0.10  | 6.32E-01 |
| RP11-1319K7.1  | -0.27 | 1.70E-01 | -0.10 | 6.32E-01 |
| RP11-311P8.2   | -0.27 | 1.58E-01 | 0.10  | 6.32E-01 |
| RP11-435O5.5   | -0.18 | 3.46E-01 | 0.10  | 6.32E-01 |
| RP11-482E14.1  | -0.21 | 2.85E-01 | -0.10 | 6.32E-01 |
| RP11-484D2.4   | -0.35 | 6.64E-02 | -0.10 | 6.32E-01 |
| RP11-544I20.2  | -0.28 | 1.45E-01 | -0.10 | 6.32E-01 |
| RP5-1065P14.3  | -0.14 | 4.91E-01 | -0.10 | 6.32E-01 |
| SLC35F6        | -0.06 | 7.80E-01 | 0.10  | 6.32E-01 |
| THRA1/BTR      | -0.11 | 5.63E-01 | 0.10  | 6.32E-01 |
| UNC45A         | 0.13  | 5.15E-01 | 0.10  | 6.32E-01 |
| ZNF45          | 0.06  | 7.60E-01 | -0.10 | 6.32E-01 |
| ZNF670         | 0.03  | 8.88E-01 | -0.10 | 6.32E-01 |
| ZNRD1-AS1      | 0.15  | 4.51E-01 | -0.10 | 6.32E-01 |
| AC114763.1     | -0.17 | 3.89E-01 | -0.10 | 6.33E-01 |
| CNTLN          | -0.37 | 5.21E-02 | -0.10 | 6.33E-01 |
| CTC-251D13.1   | 0.09  | 6.50E-01 | -0.10 | 6.33E-01 |
| FAM221B        | -0.13 | 4.98E-01 | -0.10 | 6.33E-01 |
| MIR1278        | 0.33  | 9.12E-02 | -0.10 | 6.33E-01 |
| PLOD2          | 0.02  | 9.38E-01 | -0.10 | 6.33E-01 |
| RNU7-48P       | 0.14  | 4.70E-01 | -0.10 | 6.33E-01 |
| RP1-29C18.10   | -0.03 | 8.89E-01 | -0.10 | 6.33E-01 |
| RP11-115L11.1  | 0.26  | 1.83E-01 | -0.10 | 6.33E-01 |
| RP11-144H23.2  | -0.15 | 4.39E-01 | -0.10 | 6.33E-01 |
| RP11-219E7.2   | -0.06 | 7.52E-01 | -0.10 | 6.33E-01 |
| RP11-520H14.7  | -0.15 | 4.60E-01 | -0.10 | 6.33E-01 |
| RP11-567M16.1  | -0.23 | 2.41E-01 | -0.10 | 6.33E-01 |
| RP11-722E23.2  | -0.13 | 5.19E-01 | -0.10 | 6.33E-01 |
| RPL10AP2       | 0.27  | 1.71E-01 | -0.10 | 6.33E-01 |
| RPL9           | 0.19  | 3.36E-01 | -0.10 | 6.33E-01 |
| SNORA81        | 0.01  | 9.48E-01 | -0.10 | 6.33E-01 |
| TSSK4          | -0.51 | 5.98E-03 | -0.10 | 6.33E-01 |
| XLOC_007614    | -0.09 | 6.59E-01 | -0.10 | 6.33E-01 |
| AAGAB          | 0.11  | 5.74E-01 | 0.10  | 6.33E-01 |
| AC018442.1     | -0.04 | 8.39E-01 | 0.10  | 6.33E-01 |
| ACTR3B         | -0.17 | 3.85E-01 | 0.10  | 6.33E-01 |
| ARL16          | -0.20 | 3.05E-01 | 0.10  | 6.33E-01 |

|               |       |          |       |          |
|---------------|-------|----------|-------|----------|
| CKMT2         | 0.16  | 4.16E-01 | 0.10  | 6.33E-01 |
| FLJ22447      | 0.31  | 1.07E-01 | 0.10  | 6.33E-01 |
| G26054        | 0.38  | 4.37E-02 | 0.10  | 6.33E-01 |
| GOLGA6L5P     | -0.28 | 1.48E-01 | 0.10  | 6.33E-01 |
| KRTAP4-3      | -0.22 | 2.51E-01 | 0.10  | 6.33E-01 |
| MT-ND2        | 0.30  | 1.20E-01 | 0.10  | 6.33E-01 |
| PMS2P11       | 0.16  | 4.06E-01 | 0.10  | 6.33E-01 |
| RAB27A        | 0.28  | 1.56E-01 | 0.10  | 6.33E-01 |
| RP11-181E10.3 | -0.27 | 1.61E-01 | 0.10  | 6.33E-01 |
| RP11-223A3.1  | 0.16  | 4.21E-01 | 0.10  | 6.33E-01 |
| RP11-246A10.1 | -0.04 | 8.22E-01 | 0.10  | 6.33E-01 |
| S100A4        | -0.08 | 6.86E-01 | 0.10  | 6.33E-01 |
| VPS4A         | 0.22  | 2.66E-01 | 0.10  | 6.33E-01 |
| AC005251.3    | 0.05  | 8.12E-01 | 0.10  | 6.34E-01 |
| AC091878.1    | -0.33 | 8.24E-02 | -0.10 | 6.34E-01 |
| AC092171.2    | -0.06 | 7.68E-01 | -0.10 | 6.34E-01 |
| AC093110.3    | -0.17 | 3.99E-01 | -0.10 | 6.34E-01 |
| AC093620.5    | 0.05  | 7.91E-01 | -0.10 | 6.34E-01 |
| CAPN10-AS1    | 0.02  | 9.11E-01 | -0.10 | 6.34E-01 |
| CASC11        | 0.18  | 3.54E-01 | -0.10 | 6.34E-01 |
| CLEC9A        | -0.05 | 8.14E-01 | 0.10  | 6.34E-01 |
| CPNE1         | -0.04 | 8.23E-01 | 0.10  | 6.34E-01 |
| CTD-2560E9.3  | -0.18 | 3.61E-01 | -0.10 | 6.34E-01 |
| DUSP4         | 0.15  | 4.55E-01 | -0.10 | 6.34E-01 |
| EIF1P7        | -0.11 | 5.91E-01 | 0.10  | 6.34E-01 |
| EIF4G2        | 0.23  | 2.44E-01 | 0.10  | 6.34E-01 |
| G11773        | 0.19  | 3.39E-01 | 0.10  | 6.34E-01 |
| GAPDHP14      | 0.08  | 6.86E-01 | -0.10 | 6.34E-01 |
| GBP6          | 0.08  | 6.84E-01 | 0.10  | 6.34E-01 |
| HTR1DP1       | -0.19 | 3.44E-01 | -0.10 | 6.34E-01 |
| KIAA0930      | 0.15  | 4.54E-01 | 0.10  | 6.34E-01 |
| KRT2          | -0.11 | 5.77E-01 | 0.10  | 6.34E-01 |
| KRT72         | -0.26 | 1.83E-01 | -0.10 | 6.34E-01 |
| MAPK4         | -0.04 | 8.55E-01 | -0.10 | 6.34E-01 |
| MCRS1         | 0.11  | 5.65E-01 | 0.10  | 6.34E-01 |
| MIP           | 0.02  | 9.13E-01 | 0.10  | 6.34E-01 |
| MRAS          | -0.23 | 2.41E-01 | -0.10 | 6.34E-01 |
| NSDHL         | 0.12  | 5.45E-01 | 0.10  | 6.34E-01 |
| NUDC          | -0.12 | 5.43E-01 | -0.10 | 6.34E-01 |
| POLG          | -0.02 | 9.29E-01 | 0.10  | 6.34E-01 |
| RAB1B         | 0.22  | 2.66E-01 | 0.10  | 6.34E-01 |
| RN7SL23P      | 0.18  | 3.72E-01 | -0.10 | 6.34E-01 |
| RNU7-71P      | 0.05  | 7.88E-01 | -0.10 | 6.34E-01 |
| RP11-418J17.1 | 0.26  | 1.85E-01 | 0.10  | 6.34E-01 |
| RP11-552M6.1  | -0.11 | 5.92E-01 | 0.10  | 6.34E-01 |
| RP11-692D12.1 | -0.37 | 5.27E-02 | -0.10 | 6.34E-01 |
| RP11-752G15.8 | 0.02  | 9.02E-01 | 0.10  | 6.34E-01 |



|               |       |          |       |          |
|---------------|-------|----------|-------|----------|
| RPL9P29       | 0.05  | 7.95E-01 | -0.10 | 6.34E-01 |
| RPRD1B        | 0.20  | 3.16E-01 | -0.10 | 6.34E-01 |
| SPRED2        | -0.17 | 3.94E-01 | 0.10  | 6.34E-01 |
| U91328.19     | -0.07 | 7.19E-01 | 0.10  | 6.34E-01 |
| XLOC_010205   | -0.22 | 2.67E-01 | 0.10  | 6.34E-01 |
| CTC-435M10.10 | -0.39 | 4.28E-02 | 0.10  | 6.35E-01 |
| RP11-265F19.1 | 0.14  | 4.70E-01 | 0.10  | 6.35E-01 |
| RP11-2N1.2    | -0.15 | 4.57E-01 | 0.10  | 6.35E-01 |
| RP11-407N8.6  | -0.32 | 9.42E-02 | 0.10  | 6.35E-01 |
| SLC16A5       | -0.27 | 1.67E-01 | 0.10  | 6.35E-01 |
| ST6GALNAC4P1  | 0.05  | 8.10E-01 | 0.10  | 6.35E-01 |
| TUBA4A        | 0.26  | 1.86E-01 | 0.10  | 6.35E-01 |
| AC007292.3    | 0.11  | 5.63E-01 | -0.10 | 6.35E-01 |
| AC013264.2    | -0.19 | 3.29E-01 | -0.10 | 6.35E-01 |
| ANGPTL7       | -0.16 | 4.22E-01 | -0.10 | 6.35E-01 |
| DCLK1         | -0.18 | 3.57E-01 | -0.10 | 6.35E-01 |
| FSCN2         | 0.00  | 9.88E-01 | -0.10 | 6.35E-01 |
| HCG4P7        | -0.21 | 2.78E-01 | -0.10 | 6.35E-01 |
| LINC00272     | -0.06 | 7.73E-01 | -0.10 | 6.35E-01 |
| OGFOD1        | 0.06  | 7.62E-01 | -0.10 | 6.35E-01 |
| RNA5SP187     | -0.05 | 8.09E-01 | -0.10 | 6.35E-01 |
| RNF216        | 0.02  | 9.26E-01 | -0.10 | 6.35E-01 |
| RP11-164J13.1 | -0.12 | 5.31E-01 | -0.10 | 6.35E-01 |
| RP11-264J4.10 | 0.14  | 4.89E-01 | -0.10 | 6.35E-01 |
| RP11-432J22.2 | 0.11  | 5.63E-01 | -0.10 | 6.35E-01 |
| RP3-523E19.2  | 0.01  | 9.70E-01 | -0.10 | 6.35E-01 |
| RP5-1198O20.4 | -0.14 | 4.74E-01 | -0.10 | 6.35E-01 |
| STT3A-AS1     | 0.16  | 4.23E-01 | -0.10 | 6.35E-01 |
| TYRO3P        | 0.06  | 7.45E-01 | -0.10 | 6.35E-01 |
| UBE2D4        | 0.11  | 5.74E-01 | -0.10 | 6.35E-01 |
| AL137846.1    | -0.06 | 7.52E-01 | -0.10 | 6.36E-01 |
| FAM21C        | -0.18 | 3.68E-01 | -0.10 | 6.36E-01 |
| FRY           | 0.10  | 5.95E-01 | -0.10 | 6.36E-01 |
| GPX7          | 0.12  | 5.41E-01 | -0.10 | 6.36E-01 |
| HLA-Z         | 0.32  | 9.71E-02 | -0.10 | 6.36E-01 |
| IL17A         | 0.39  | 4.10E-02 | -0.10 | 6.36E-01 |
| IQUB          | -0.25 | 2.06E-01 | -0.10 | 6.36E-01 |
| LHFP          | -0.38 | 4.76E-02 | -0.10 | 6.36E-01 |
| MIR635        | -0.15 | 4.59E-01 | -0.10 | 6.36E-01 |
| ORC5          | 0.26  | 1.83E-01 | -0.10 | 6.36E-01 |
| REM2          | -0.32 | 9.24E-02 | -0.10 | 6.36E-01 |
| RP11-298J23.5 | -0.15 | 4.61E-01 | -0.10 | 6.36E-01 |
| RP11-759F5.1  | 0.00  | 1.00E+00 | -0.10 | 6.36E-01 |
| RP4-800G7.3   | -0.08 | 6.81E-01 | -0.10 | 6.36E-01 |
| S100A6        | 0.04  | 8.39E-01 | -0.10 | 6.36E-01 |
| STK32B        | -0.05 | 8.17E-01 | -0.10 | 6.36E-01 |
| TRMT12        | 0.16  | 4.13E-01 | -0.10 | 6.36E-01 |

|                |       |          |       |          |
|----------------|-------|----------|-------|----------|
| VAC14-AS1      | -0.06 | 7.73E-01 | -0.10 | 6.36E-01 |
| AC004017.1     | 0.10  | 6.11E-01 | 0.10  | 6.36E-01 |
| CCND3          | 0.14  | 4.65E-01 | 0.10  | 6.36E-01 |
| COPS7B         | -0.04 | 8.44E-01 | 0.10  | 6.36E-01 |
| COX6B2         | -0.39 | 4.28E-02 | 0.10  | 6.36E-01 |
| CTD-2231H16.1  | -0.02 | 9.34E-01 | 0.10  | 6.36E-01 |
| CTD-3105H18.11 | -0.13 | 4.99E-01 | 0.10  | 6.36E-01 |
| GALNT5         | 0.33  | 8.59E-02 | 0.10  | 6.36E-01 |
| GRPEL1         | 0.17  | 3.95E-01 | 0.10  | 6.36E-01 |
| HCN3           | -0.32 | 9.96E-02 | 0.10  | 6.36E-01 |
| HSF1           | 0.10  | 5.99E-01 | 0.10  | 6.36E-01 |
| LIN7B          | -0.34 | 8.08E-02 | 0.10  | 6.36E-01 |
| MMP7           | -0.15 | 4.60E-01 | 0.10  | 6.36E-01 |
| RP3-402G11.25  | -0.09 | 6.38E-01 | 0.10  | 6.36E-01 |
| RPL41P2        | -0.21 | 2.92E-01 | 0.10  | 6.36E-01 |
| SIM1           | 0.01  | 9.78E-01 | 0.10  | 6.36E-01 |
| ZNF831         | 0.19  | 3.30E-01 | 0.10  | 6.36E-01 |
| AC007365.4     | 0.16  | 4.14E-01 | -0.09 | 6.37E-01 |
| BET1           | 0.14  | 4.70E-01 | 0.09  | 6.37E-01 |
| C19orf60       | -0.11 | 5.86E-01 | 0.09  | 6.37E-01 |
| CEACAMP8       | 0.36  | 6.13E-02 | -0.09 | 6.37E-01 |
| CECR2          | -0.10 | 6.24E-01 | -0.09 | 6.37E-01 |
| CERCAM         | -0.30 | 1.25E-01 | 0.09  | 6.37E-01 |
| CSRNP3         | 0.06  | 7.65E-01 | -0.09 | 6.37E-01 |
| CTC-398G3.2    | 0.19  | 3.37E-01 | -0.09 | 6.37E-01 |
| DAB2           | -0.31 | 1.13E-01 | -0.09 | 6.37E-01 |
| EPC1           | -0.11 | 5.82E-01 | -0.09 | 6.37E-01 |
| G22291         | -0.29 | 1.31E-01 | -0.09 | 6.37E-01 |
| HES6           | 0.17  | 3.88E-01 | 0.09  | 6.37E-01 |
| HIST1H3I       | -0.10 | 6.07E-01 | 0.09  | 6.37E-01 |
| HMG2P3         | 0.21  | 2.90E-01 | -0.09 | 6.37E-01 |
| HNRNPA1P36     | -0.02 | 9.25E-01 | -0.09 | 6.37E-01 |
| HYI-AS1        | -0.02 | 9.05E-01 | -0.09 | 6.37E-01 |
| MORN1          | 0.21  | 2.73E-01 | 0.09  | 6.37E-01 |
| NANOS3         | -0.01 | 9.43E-01 | -0.09 | 6.37E-01 |
| NR4A3          | 0.24  | 2.23E-01 | 0.09  | 6.37E-01 |
| PECR           | -0.29 | 1.40E-01 | -0.09 | 6.37E-01 |
| PPARA          | 0.35  | 6.64E-02 | -0.09 | 6.37E-01 |
| PPP4R1L        | -0.16 | 4.25E-01 | -0.09 | 6.37E-01 |
| RAP1A          | -0.14 | 4.86E-01 | -0.09 | 6.37E-01 |
| RASA4CP        | 0.16  | 4.24E-01 | 0.09  | 6.37E-01 |
| RCCD1          | 0.10  | 6.22E-01 | 0.09  | 6.37E-01 |
| RP11-257O5.4   | 0.17  | 3.76E-01 | -0.09 | 6.37E-01 |
| RP11-449L23.3  | -0.17 | 3.77E-01 | -0.09 | 6.37E-01 |
| RP3-527G5.1    | 0.15  | 4.33E-01 | 0.09  | 6.37E-01 |
| RP4-752I6.1    | -0.03 | 8.61E-01 | -0.09 | 6.37E-01 |
| WDR47          | -0.18 | 3.60E-01 | -0.09 | 6.37E-01 |

|                |       |          |       |          |
|----------------|-------|----------|-------|----------|
| AC020900.2     | 0.19  | 3.37E-01 | 0.09  | 6.39E-01 |
| APOBEC3A       | -0.11 | 5.92E-01 | 0.09  | 6.39E-01 |
| BRMS1L         | 0.24  | 2.22E-01 | -0.09 | 6.39E-01 |
| CRYBG3         | -0.19 | 3.31E-01 | -0.09 | 6.39E-01 |
| CYP2D6         | -0.18 | 3.66E-01 | -0.09 | 6.39E-01 |
| DHX8           | 0.04  | 8.21E-01 | 0.09  | 6.39E-01 |
| DPH3           | 0.00  | 9.90E-01 | 0.09  | 6.39E-01 |
| DYNC1LI2       | -0.11 | 5.75E-01 | 0.09  | 6.39E-01 |
| FTO-IT1        | -0.11 | 5.73E-01 | -0.09 | 6.39E-01 |
| G32306         | -0.19 | 3.37E-01 | 0.09  | 6.39E-01 |
| HECW1          | 0.05  | 7.83E-01 | 0.09  | 6.39E-01 |
| HNRNPU         | 0.04  | 8.38E-01 | -0.09 | 6.39E-01 |
| IL6            | 0.01  | 9.42E-01 | -0.09 | 6.39E-01 |
| MIR211         | 0.05  | 7.84E-01 | -0.09 | 6.39E-01 |
| MPDZ           | -0.39 | 4.20E-02 | -0.09 | 6.39E-01 |
| NKTR           | -0.13 | 5.21E-01 | -0.09 | 6.39E-01 |
| PACERR         | -0.03 | 8.71E-01 | -0.09 | 6.39E-01 |
| PON2           | 0.37  | 5.33E-02 | 0.09  | 6.39E-01 |
| RNA5SP317      | -0.01 | 9.77E-01 | -0.09 | 6.39E-01 |
| RNF220         | 0.07  | 7.22E-01 | -0.09 | 6.39E-01 |
| RP1-28O10.1    | -0.29 | 1.38E-01 | 0.09  | 6.39E-01 |
| RP11-1299A16.3 | -0.03 | 8.80E-01 | -0.09 | 6.39E-01 |
| RP11-19E11.1   | -0.03 | 8.67E-01 | 0.09  | 6.39E-01 |
| RP11-22P6.2    | 0.10  | 6.18E-01 | -0.09 | 6.39E-01 |
| RP11-276H7.2   | -0.01 | 9.70E-01 | 0.09  | 6.39E-01 |
| RP11-47A8.5    | 0.11  | 5.63E-01 | 0.09  | 6.39E-01 |
| RP11-713D19.1  | -0.14 | 4.66E-01 | -0.09 | 6.39E-01 |
| RP4-687K1.2    | -0.27 | 1.72E-01 | 0.09  | 6.39E-01 |
| SGSM2          | 0.14  | 4.70E-01 | -0.09 | 6.39E-01 |
| TGFBRAP1       | -0.03 | 8.68E-01 | -0.09 | 6.39E-01 |
| TRAJ9          | 0.33  | 9.09E-02 | 0.09  | 6.39E-01 |
| TRAM2          | -0.14 | 4.90E-01 | 0.09  | 6.39E-01 |
| TXNIP          | 0.07  | 7.16E-01 | 0.09  | 6.39E-01 |
| VN2R17P        | 0.13  | 5.17E-01 | 0.09  | 6.39E-01 |
| XLOC_004182    | 0.31  | 1.09E-01 | -0.09 | 6.39E-01 |
| ZNF644         | 0.08  | 6.88E-01 | -0.09 | 6.39E-01 |
| AC009120.3     | -0.26 | 1.83E-01 | -0.09 | 6.40E-01 |
| AC012363.8     | -0.30 | 1.22E-01 | -0.09 | 6.40E-01 |
| ARHGAP26       | -0.28 | 1.49E-01 | -0.09 | 6.40E-01 |
| DENND6A-AS1    | -0.21 | 2.73E-01 | -0.09 | 6.40E-01 |
| HDAC4          | 0.12  | 5.27E-01 | 0.09  | 6.40E-01 |
| KDM3B          | -0.03 | 8.87E-01 | -0.09 | 6.40E-01 |
| LINC00482      | -0.46 | 1.27E-02 | 0.09  | 6.40E-01 |
| MIR342         | -0.05 | 7.93E-01 | 0.09  | 6.40E-01 |
| MOB1A          | 0.17  | 3.87E-01 | -0.09 | 6.40E-01 |
| NKRF           | 0.23  | 2.37E-01 | -0.09 | 6.40E-01 |
| NRAS           | 0.00  | 9.88E-01 | -0.09 | 6.40E-01 |

|                |       |          |       |          |
|----------------|-------|----------|-------|----------|
| PCDHGB1        | 0.08  | 6.99E-01 | 0.09  | 6.40E-01 |
| PI4KAP1        | -0.20 | 3.17E-01 | -0.09 | 6.40E-01 |
| RP11-307C12.13 | 0.11  | 5.80E-01 | 0.09  | 6.40E-01 |
| RP11-45M22.5   | -0.10 | 6.02E-01 | 0.09  | 6.40E-01 |
| RP11-498D10.5  | 0.06  | 7.65E-01 | 0.09  | 6.40E-01 |
| RP11-583F2.5   | 0.10  | 5.97E-01 | -0.09 | 6.40E-01 |
| RP11-616M22.3  | 0.01  | 9.59E-01 | -0.09 | 6.40E-01 |
| SUZ12P1        | 0.20  | 3.05E-01 | -0.09 | 6.40E-01 |
| TM4SF19-AS1    | 0.10  | 6.30E-01 | -0.09 | 6.40E-01 |
| TMEM156        | 0.30  | 1.23E-01 | -0.09 | 6.40E-01 |
| UBXN2A         | 0.19  | 3.29E-01 | -0.09 | 6.40E-01 |
| VAT1L          | 0.04  | 8.53E-01 | -0.09 | 6.40E-01 |
| XLOC_009724    | -0.17 | 3.89E-01 | -0.09 | 6.40E-01 |
| AC000078.5     | 0.35  | 6.52E-02 | 0.09  | 6.41E-01 |
| AC105760.3     | -0.37 | 5.52E-02 | -0.09 | 6.41E-01 |
| ALDOC          | -0.03 | 8.80E-01 | 0.09  | 6.41E-01 |
| BBS7           | -0.08 | 6.90E-01 | -0.09 | 6.41E-01 |
| BCL6B          | 0.00  | 9.85E-01 | 0.09  | 6.41E-01 |
| BVES           | 0.03  | 8.88E-01 | 0.09  | 6.41E-01 |
| C8orf88        | -0.17 | 3.76E-01 | 0.09  | 6.41E-01 |
| CACNA1I        | -0.11 | 5.65E-01 | -0.09 | 6.41E-01 |
| CCDC169        | 0.16  | 4.12E-01 | -0.09 | 6.41E-01 |
| G22135         | 0.08  | 7.04E-01 | -0.09 | 6.41E-01 |
| G32325         | -0.22 | 2.57E-01 | -0.09 | 6.41E-01 |
| HNRNPUL2-BSCL2 | 0.15  | 4.49E-01 | 0.09  | 6.41E-01 |
| KIF16B         | -0.51 | 5.53E-03 | -0.09 | 6.41E-01 |
| MIR378A        | 0.19  | 3.24E-01 | 0.09  | 6.41E-01 |
| NMUR1          | -0.22 | 2.50E-01 | -0.09 | 6.41E-01 |
| RN7SL577P      | -0.10 | 6.22E-01 | -0.09 | 6.41E-01 |
| RP11-131L12.2  | 0.18  | 3.65E-01 | -0.09 | 6.41E-01 |
| RP11-160E2.6   | 0.25  | 1.95E-01 | 0.09  | 6.41E-01 |
| RP11-255E6.6   | 0.14  | 4.77E-01 | -0.09 | 6.41E-01 |
| RP11-382A20.1  | 0.09  | 6.35E-01 | 0.09  | 6.41E-01 |
| RP11-502N13.2  | 0.12  | 5.28E-01 | 0.09  | 6.41E-01 |
| RP11-757G1.5   | 0.09  | 6.63E-01 | -0.09 | 6.41E-01 |
| RP11-93O14.3   | -0.22 | 2.66E-01 | -0.09 | 6.41E-01 |
| RP11-96D1.6    | 0.42  | 2.53E-02 | -0.09 | 6.41E-01 |
| RP5-1024G6.2   | -0.27 | 1.71E-01 | 0.09  | 6.41E-01 |
| RP5-1125A11.4  | -0.10 | 6.04E-01 | -0.09 | 6.41E-01 |
| RP5-844F9.1    | -0.17 | 3.93E-01 | -0.09 | 6.41E-01 |
| RPL23AP50      | -0.01 | 9.57E-01 | 0.09  | 6.41E-01 |
| RPS6KB1        | 0.22  | 2.62E-01 | -0.09 | 6.41E-01 |
| RYKP1          | 0.01  | 9.57E-01 | -0.09 | 6.41E-01 |
| 2-Sep          | 0.18  | 3.52E-01 | -0.09 | 6.41E-01 |
| SHISA8         | -0.05 | 7.86E-01 | 0.09  | 6.41E-01 |
| SPRTN          | 0.14  | 4.84E-01 | -0.09 | 6.41E-01 |
| TACO1          | 0.18  | 3.61E-01 | 0.09  | 6.41E-01 |

|                |       |          |       |          |
|----------------|-------|----------|-------|----------|
| ZNF284         | -0.07 | 7.22E-01 | -0.09 | 6.41E-01 |
| AATK           | -0.07 | 7.21E-01 | -0.09 | 6.42E-01 |
| AC026703.2     | 0.27  | 1.68E-01 | -0.09 | 6.42E-01 |
| ASB12          | 0.05  | 7.82E-01 | -0.09 | 6.42E-01 |
| CFAP58-AS1     | 0.11  | 5.87E-01 | -0.09 | 6.42E-01 |
| CHRNA6         | 0.36  | 5.82E-02 | 0.09  | 6.42E-01 |
| CTD-2574D22.4  | 0.11  | 5.90E-01 | -0.09 | 6.42E-01 |
| EDC4           | 0.13  | 5.09E-01 | -0.09 | 6.42E-01 |
| FOXP1-IT1      | -0.21 | 2.78E-01 | -0.09 | 6.42E-01 |
| G13886         | 0.12  | 5.33E-01 | -0.09 | 6.42E-01 |
| GARS           | 0.12  | 5.59E-01 | 0.09  | 6.42E-01 |
| HFM1           | -0.04 | 8.43E-01 | -0.09 | 6.42E-01 |
| HSPBAP1        | -0.07 | 7.27E-01 | 0.09  | 6.42E-01 |
| LCE3B          | 0.17  | 3.89E-01 | 0.09  | 6.42E-01 |
| LINC01018      | 0.12  | 5.41E-01 | -0.09 | 6.42E-01 |
| LKAAEAR1       | -0.15 | 4.43E-01 | 0.09  | 6.42E-01 |
| MCTS2P         | 0.20  | 2.97E-01 | -0.09 | 6.42E-01 |
| MRPL11         | 0.08  | 6.71E-01 | -0.09 | 6.42E-01 |
| MT-ND4L        | 0.13  | 5.06E-01 | 0.09  | 6.42E-01 |
| MYL4           | 0.07  | 7.35E-01 | -0.09 | 6.42E-01 |
| NRF1           | -0.22 | 2.68E-01 | 0.09  | 6.42E-01 |
| RN7SL471P      | 0.08  | 6.76E-01 | -0.09 | 6.42E-01 |
| RP1-149A16.3   | -0.27 | 1.72E-01 | 0.09  | 6.42E-01 |
| RP11-165F24.5  | 0.03  | 8.79E-01 | -0.09 | 6.42E-01 |
| RP11-167N4.4   | -0.06 | 7.53E-01 | 0.09  | 6.42E-01 |
| RP11-264L1.2   | 0.16  | 4.23E-01 | 0.09  | 6.42E-01 |
| RP11-273G15.2  | -0.17 | 3.88E-01 | -0.09 | 6.42E-01 |
| RP11-285J16.1  | 0.28  | 1.49E-01 | 0.09  | 6.42E-01 |
| RP11-325L12.3  | 0.05  | 7.85E-01 | -0.09 | 6.42E-01 |
| RP11-357P18.2  | -0.33 | 8.84E-02 | 0.09  | 6.42E-01 |
| RP11-384M20.1  | -0.41 | 2.90E-02 | -0.09 | 6.42E-01 |
| RP11-422P24.10 | -0.15 | 4.31E-01 | 0.09  | 6.42E-01 |
| RP3-329E20.2   | 0.00  | 9.96E-01 | 0.09  | 6.42E-01 |
| TMEM102        | 0.09  | 6.67E-01 | 0.09  | 6.42E-01 |
| TNFRSF10C      | -0.05 | 7.83E-01 | 0.09  | 6.42E-01 |
| UQCRBP1        | -0.44 | 1.94E-02 | 0.09  | 6.42E-01 |
| WDR61          | -0.05 | 7.97E-01 | -0.09 | 6.42E-01 |
| XLOC_001048    | -0.14 | 4.65E-01 | -0.09 | 6.42E-01 |
| YY1P1          | 0.10  | 6.01E-01 | -0.09 | 6.42E-01 |
| ZNF141         | -0.16 | 4.15E-01 | -0.09 | 6.42E-01 |
| ZNF81          | 0.32  | 1.01E-01 | -0.09 | 6.42E-01 |
| CERS5          | -0.23 | 2.44E-01 | -0.09 | 6.43E-01 |
| CFL1P5         | -0.03 | 8.89E-01 | -0.09 | 6.43E-01 |
| CTD-2066L21.2  | -0.18 | 3.66E-01 | -0.09 | 6.43E-01 |
| CTD-3203P2.1   | -0.33 | 8.48E-02 | -0.09 | 6.43E-01 |
| GS1-166A23.2   | -0.35 | 7.20E-02 | 0.09  | 6.43E-01 |
| IER3IP1        | 0.22  | 2.59E-01 | -0.09 | 6.43E-01 |

|                |       |          |       |          |
|----------------|-------|----------|-------|----------|
| ITIH5          | -0.21 | 2.89E-01 | -0.09 | 6.43E-01 |
| KARSP2         | -0.17 | 3.75E-01 | 0.09  | 6.43E-01 |
| KIF13A         | -0.09 | 6.51E-01 | -0.09 | 6.43E-01 |
| LINC00536      | 0.12  | 5.36E-01 | -0.09 | 6.43E-01 |
| MAPRE2         | 0.02  | 9.15E-01 | -0.09 | 6.43E-01 |
| MESP1          | 0.19  | 3.22E-01 | 0.09  | 6.43E-01 |
| PMS2P3         | -0.30 | 1.27E-01 | -0.09 | 6.43E-01 |
| RNA5SP221      | -0.16 | 4.24E-01 | 0.09  | 6.43E-01 |
| RP1-39G22.4    | -0.13 | 5.17E-01 | 0.09  | 6.43E-01 |
| RP11-1070N10.3 | -0.36 | 5.84E-02 | 0.09  | 6.43E-01 |
| RP11-140H17.2  | -0.07 | 7.05E-01 | -0.09 | 6.43E-01 |
| RP11-203B9.4   | -0.13 | 5.25E-01 | -0.09 | 6.43E-01 |
| RP11-225B17.2  | 0.21  | 2.87E-01 | -0.09 | 6.43E-01 |
| RP11-379B18.5  | -0.10 | 5.95E-01 | -0.09 | 6.43E-01 |
| RP11-390P2.4   | -0.07 | 7.23E-01 | -0.09 | 6.43E-01 |
| RP11-423H2.3   | -0.16 | 4.06E-01 | 0.09  | 6.43E-01 |
| RP11-5C23.2    | -0.20 | 3.10E-01 | -0.09 | 6.43E-01 |
| RP11-66N24.3   | 0.10  | 6.25E-01 | -0.09 | 6.43E-01 |
| RPL23AP11      | 0.20  | 3.17E-01 | -0.09 | 6.43E-01 |
| RPL35P3        | 0.33  | 9.09E-02 | 0.09  | 6.43E-01 |
| THBS2          | -0.22 | 2.56E-01 | 0.09  | 6.43E-01 |
| TPPP2          | 0.11  | 5.92E-01 | -0.09 | 6.43E-01 |
| USP3           | 0.10  | 6.21E-01 | -0.09 | 6.43E-01 |
| ZNF562         | 0.28  | 1.48E-01 | 0.09  | 6.43E-01 |
| ANAPC11        | -0.02 | 9.27E-01 | 0.09  | 6.44E-01 |
| CDC42BPG       | -0.30 | 1.21E-01 | -0.09 | 6.44E-01 |
| COL5A3         | 0.01  | 9.78E-01 | 0.09  | 6.44E-01 |
| CRIM1          | -0.09 | 6.65E-01 | -0.09 | 6.44E-01 |
| CTD-2349P21.5  | 0.00  | 9.83E-01 | -0.09 | 6.44E-01 |
| CTSG           | -0.07 | 7.26E-01 | -0.09 | 6.44E-01 |
| DNAJB9         | 0.01  | 9.51E-01 | -0.09 | 6.44E-01 |
| DPY30          | 0.01  | 9.67E-01 | 0.09  | 6.44E-01 |
| EIF6           | 0.24  | 2.17E-01 | 0.09  | 6.44E-01 |
| ERCC6          | 0.01  | 9.61E-01 | 0.09  | 6.44E-01 |
| JTB            | 0.09  | 6.63E-01 | -0.09 | 6.44E-01 |
| KHSRP          | 0.08  | 6.83E-01 | 0.09  | 6.44E-01 |
| KIF1C          | 0.04  | 8.24E-01 | 0.09  | 6.44E-01 |
| LACTB2         | -0.01 | 9.66E-01 | 0.09  | 6.44E-01 |
| LBR            | 0.18  | 3.49E-01 | -0.09 | 6.44E-01 |
| LINC01088      | -0.05 | 7.87E-01 | 0.09  | 6.44E-01 |
| MIR762HG       | -0.13 | 5.21E-01 | -0.09 | 6.44E-01 |
| MYH10          | -0.24 | 2.28E-01 | 0.09  | 6.44E-01 |
| OVOL2          | 0.25  | 2.05E-01 | 0.09  | 6.44E-01 |
| PDE1A          | -0.27 | 1.62E-01 | 0.09  | 6.44E-01 |
| PGR            | -0.27 | 1.59E-01 | -0.09 | 6.44E-01 |
| PKNOX2         | 0.10  | 6.02E-01 | 0.09  | 6.44E-01 |
| PRELID1        | 0.23  | 2.41E-01 | 0.09  | 6.44E-01 |

|                      |       |          |       |          |
|----------------------|-------|----------|-------|----------|
| <b>RNF13</b>         | -0.01 | 9.65E-01 | -0.09 | 6.44E-01 |
| <b>RNU6-1005P</b>    | 0.06  | 7.62E-01 | -0.09 | 6.44E-01 |
| <b>RP11-103C16.2</b> | -0.04 | 8.29E-01 | 0.09  | 6.44E-01 |
| <b>RP11-108M9.6</b>  | -0.09 | 6.67E-01 | -0.09 | 6.44E-01 |
| <b>RP11-214J9.1</b>  | -0.19 | 3.30E-01 | -0.09 | 6.44E-01 |
| <b>RP11-23P13.4</b>  | 0.25  | 2.03E-01 | 0.09  | 6.44E-01 |
| <b>RP11-26H16.1</b>  | 0.03  | 8.93E-01 | -0.09 | 6.44E-01 |
| <b>RP11-291L22.9</b> | -0.18 | 3.56E-01 | 0.09  | 6.44E-01 |
| <b>RP11-403I13.5</b> | 0.14  | 4.90E-01 | -0.09 | 6.44E-01 |
| <b>RP11-458I7.1</b>  | -0.09 | 6.39E-01 | 0.09  | 6.44E-01 |
| <b>RP11-535C21.3</b> | -0.13 | 5.23E-01 | 0.09  | 6.44E-01 |
| <b>RP11-592B15.4</b> | -0.02 | 9.05E-01 | 0.09  | 6.44E-01 |
| <b>RP11-611O2.6</b>  | -0.05 | 7.82E-01 | -0.09 | 6.44E-01 |
| <b>RP11-613D13.4</b> | 0.32  | 9.50E-02 | -0.09 | 6.44E-01 |
| <b>RP11-690I21.2</b> | -0.32 | 1.02E-01 | -0.09 | 6.44E-01 |
| <b>RPL36</b>         | 0.13  | 4.95E-01 | 0.09  | 6.44E-01 |
| <b>SETDB1</b>        | 0.02  | 9.06E-01 | 0.09  | 6.44E-01 |
| <b>SNORD119</b>      | 0.00  | 9.98E-01 | 0.09  | 6.44E-01 |
| <b>SPIN3</b>         | 0.23  | 2.46E-01 | 0.09  | 6.44E-01 |
| <b>TRPA1</b>         | -0.07 | 7.17E-01 | 0.09  | 6.44E-01 |
| <b>AC002306.1</b>    | -0.42 | 2.43E-02 | 0.09  | 6.45E-01 |
| <b>AC010091.1</b>    | -0.23 | 2.32E-01 | 0.09  | 6.45E-01 |
| <b>AC021078.1</b>    | 0.21  | 2.87E-01 | 0.09  | 6.45E-01 |
| <b>AC144652.1</b>    | 0.13  | 5.06E-01 | 0.09  | 6.45E-01 |
| <b>ACKR3</b>         | -0.04 | 8.38E-01 | 0.09  | 6.45E-01 |
| <b>AGPAT4-IT1</b>    | 0.14  | 4.85E-01 | -0.09 | 6.45E-01 |
| <b>AL109767.1</b>    | -0.06 | 7.50E-01 | -0.09 | 6.45E-01 |
| <b>ANXA9</b>         | -0.29 | 1.35E-01 | -0.09 | 6.45E-01 |
| <b>ARAP1</b>         | -0.09 | 6.42E-01 | 0.09  | 6.45E-01 |
| <b>BTBD7P1</b>       | -0.07 | 7.21E-01 | 0.09  | 6.45E-01 |
| <b>CENPU</b>         | 0.04  | 8.28E-01 | -0.09 | 6.45E-01 |
| <b>CTA-246H3.11</b>  | -0.12 | 5.50E-01 | -0.09 | 6.45E-01 |
| <b>DHX40</b>         | -0.14 | 4.67E-01 | -0.09 | 6.45E-01 |
| <b>DXO</b>           | -0.07 | 7.21E-01 | 0.09  | 6.45E-01 |
| <b>FASTKD1</b>       | 0.05  | 8.02E-01 | 0.09  | 6.45E-01 |
| <b>G34216</b>        | 0.35  | 6.59E-02 | 0.09  | 6.45E-01 |
| <b>GTF3C2-AS1</b>    | -0.40 | 3.45E-02 | -0.09 | 6.45E-01 |
| <b>H2AFY2</b>        | -0.01 | 9.79E-01 | 0.09  | 6.45E-01 |
| <b>LRRC43</b>        | -0.13 | 4.99E-01 | -0.09 | 6.45E-01 |
| <b>MAP3K7CL</b>      | -0.01 | 9.42E-01 | 0.09  | 6.45E-01 |
| <b>MIR623</b>        | 0.09  | 6.67E-01 | -0.09 | 6.45E-01 |
| <b>RGS11</b>         | -0.15 | 4.38E-01 | 0.09  | 6.45E-01 |
| <b>RIMS1</b>         | -0.19 | 3.35E-01 | -0.09 | 6.45E-01 |
| <b>RNPS1</b>         | 0.11  | 5.91E-01 | 0.09  | 6.45E-01 |
| <b>RP11-355B11.2</b> | -0.05 | 7.82E-01 | -0.09 | 6.45E-01 |
| <b>RP11-506K6.4</b>  | -0.10 | 6.01E-01 | -0.09 | 6.45E-01 |
| <b>RP11-61I13.3</b>  | -0.01 | 9.61E-01 | -0.09 | 6.45E-01 |

|                      |       |          |       |          |
|----------------------|-------|----------|-------|----------|
| <b>RP11-88118.3</b>  | -0.26 | 1.78E-01 | 0.09  | 6.45E-01 |
| <b>RP3-406A7.3</b>   | 0.23  | 2.32E-01 | -0.09 | 6.45E-01 |
| <b>SCT</b>           | -0.01 | 9.49E-01 | -0.09 | 6.45E-01 |
| <b>SUCLA2</b>        | 0.12  | 5.41E-01 | -0.09 | 6.45E-01 |
| <b>TRAV23DV6</b>     | 0.22  | 2.71E-01 | 0.09  | 6.45E-01 |
| <b>TRHDE</b>         | -0.13 | 4.99E-01 | -0.09 | 6.45E-01 |
| <b>TSPAN33</b>       | 0.12  | 5.27E-01 | -0.09 | 6.45E-01 |
| <b>VMA21</b>         | 0.25  | 2.08E-01 | -0.09 | 6.45E-01 |
| <b>XLOC_009765</b>   | 0.03  | 8.80E-01 | 0.09  | 6.45E-01 |
| <b>AMT</b>           | -0.06 | 7.68E-01 | -0.09 | 6.46E-01 |
| <b>CDK2AP1</b>       | 0.11  | 5.79E-01 | 0.09  | 6.46E-01 |
| <b>DNAH2</b>         | 0.02  | 9.14E-01 | -0.09 | 6.46E-01 |
| <b>ENC1</b>          | -0.10 | 6.09E-01 | 0.09  | 6.46E-01 |
| <b>ERLEC1</b>        | 0.19  | 3.24E-01 | -0.09 | 6.46E-01 |
| <b>GABPB1-AS1</b>    | -0.20 | 3.04E-01 | -0.09 | 6.46E-01 |
| <b>GTSE1</b>         | 0.02  | 9.16E-01 | 0.09  | 6.46E-01 |
| <b>HERC1</b>         | -0.30 | 1.16E-01 | -0.09 | 6.46E-01 |
| <b>IGLV3-25</b>      | 0.37  | 5.12E-02 | -0.09 | 6.46E-01 |
| <b>IKBIP</b>         | 0.20  | 3.14E-01 | -0.09 | 6.46E-01 |
| <b>KDM4E</b>         | -0.12 | 5.45E-01 | 0.09  | 6.46E-01 |
| <b>LINC01213</b>     | -0.22 | 2.68E-01 | -0.09 | 6.46E-01 |
| <b>MIR561</b>        | 0.09  | 6.49E-01 | -0.09 | 6.46E-01 |
| <b>PCDHB4</b>        | 0.26  | 1.85E-01 | 0.09  | 6.46E-01 |
| <b>PGM2</b>          | 0.28  | 1.51E-01 | 0.09  | 6.46E-01 |
| <b>PHACTR2-AS1</b>   | 0.00  | 9.87E-01 | -0.09 | 6.46E-01 |
| <b>PPP1R8</b>        | -0.12 | 5.35E-01 | -0.09 | 6.46E-01 |
| <b>PXMP4</b>         | 0.20  | 3.17E-01 | 0.09  | 6.46E-01 |
| <b>RASL10B</b>       | 0.28  | 1.52E-01 | 0.09  | 6.46E-01 |
| <b>RN7SL220P</b>     | 0.23  | 2.29E-01 | -0.09 | 6.46E-01 |
| <b>RNU6-979P</b>     | -0.12 | 5.29E-01 | 0.09  | 6.46E-01 |
| <b>RP11-456P18.2</b> | 0.19  | 3.34E-01 | -0.09 | 6.46E-01 |
| <b>RP11-656D10.3</b> | 0.34  | 8.08E-02 | 0.09  | 6.46E-01 |
| <b>RP11-900F13.3</b> | -0.25 | 2.09E-01 | 0.09  | 6.46E-01 |
| <b>RP5-1112D6.7</b>  | 0.09  | 6.44E-01 | -0.09 | 6.46E-01 |
| <b>RP5-884C9.3</b>   | -0.03 | 8.87E-01 | -0.09 | 6.46E-01 |
| <b>SNORD114-21</b>   | -0.07 | 7.07E-01 | -0.09 | 6.46E-01 |
| <b>SUV39H2</b>       | 0.22  | 2.68E-01 | -0.09 | 6.46E-01 |
| <b>TERC</b>          | 0.22  | 2.56E-01 | -0.09 | 6.46E-01 |
| <b>U47924.6</b>      | 0.17  | 3.79E-01 | 0.09  | 6.46E-01 |
| <b>AC024560.3</b>    | -0.09 | 6.53E-01 | -0.09 | 6.47E-01 |
| <b>AC069200.1</b>    | -0.07 | 7.27E-01 | 0.09  | 6.47E-01 |
| <b>AC105402.4</b>    | 0.00  | 9.94E-01 | -0.09 | 6.47E-01 |
| <b>ARL2BP</b>        | 0.18  | 3.62E-01 | 0.09  | 6.47E-01 |
| <b>BUD31</b>         | 0.03  | 8.81E-01 | -0.09 | 6.47E-01 |
| <b>CFL1P3</b>        | 0.05  | 8.07E-01 | -0.09 | 6.47E-01 |
| <b>COMMD5</b>        | 0.11  | 5.84E-01 | 0.09  | 6.47E-01 |
| <b>CTD-3035K23.3</b> | -0.13 | 4.93E-01 | 0.09  | 6.47E-01 |



|               |       |          |       |          |
|---------------|-------|----------|-------|----------|
| DUSP10        | -0.04 | 8.46E-01 | 0.09  | 6.47E-01 |
| EEF1A1P32     | -0.18 | 3.71E-01 | -0.09 | 6.47E-01 |
| FAM3B         | 0.10  | 6.12E-01 | 0.09  | 6.47E-01 |
| G25266        | 0.02  | 9.17E-01 | 0.09  | 6.47E-01 |
| G40985        | 0.10  | 6.00E-01 | -0.09 | 6.47E-01 |
| GEMIN8P4      | 0.38  | 4.85E-02 | 0.09  | 6.47E-01 |
| GLIPR1L2      | 0.14  | 4.81E-01 | -0.09 | 6.47E-01 |
| HPX           | -0.19 | 3.42E-01 | -0.09 | 6.47E-01 |
| KRTAP5-8      | -0.04 | 8.55E-01 | -0.09 | 6.47E-01 |
| LIN28A        | -0.13 | 5.18E-01 | -0.09 | 6.47E-01 |
| PSG6          | 0.36  | 5.76E-02 | 0.09  | 6.47E-01 |
| RLN1          | -0.04 | 8.58E-01 | -0.09 | 6.47E-01 |
| RN7SL442P     | 0.31  | 1.11E-01 | 0.09  | 6.47E-01 |
| RNA5SP195     | -0.33 | 8.34E-02 | -0.09 | 6.47E-01 |
| RNASEH2A      | 0.10  | 6.13E-01 | 0.09  | 6.47E-01 |
| RP11-23P13.6  | -0.11 | 5.61E-01 | -0.09 | 6.47E-01 |
| RP11-534L20.4 | -0.12 | 5.33E-01 | 0.09  | 6.47E-01 |
| RP11-599J14.2 | -0.30 | 1.26E-01 | -0.09 | 6.47E-01 |
| RP11-776B3.1  | -0.05 | 8.04E-01 | 0.09  | 6.47E-01 |
| RPS20P4       | 0.01  | 9.67E-01 | -0.09 | 6.47E-01 |
| SCYL2         | 0.23  | 2.46E-01 | 0.09  | 6.47E-01 |
| SEMA4D        | -0.15 | 4.55E-01 | 0.09  | 6.47E-01 |
| SNRPCP9       | -0.26 | 1.80E-01 | 0.09  | 6.47E-01 |
| TIPRL         | 0.12  | 5.52E-01 | -0.09 | 6.47E-01 |
| TMEM135       | 0.37  | 5.56E-02 | 0.09  | 6.47E-01 |
| ZBTB37        | 0.07  | 7.27E-01 | -0.09 | 6.47E-01 |
| AC010329.1    | 0.09  | 6.54E-01 | -0.09 | 6.48E-01 |
| AC010524.2    | 0.04  | 8.29E-01 | -0.09 | 6.48E-01 |
| AC079807.3    | 0.09  | 6.41E-01 | 0.09  | 6.48E-01 |
| APOBEC4       | -0.13 | 5.24E-01 | 0.09  | 6.48E-01 |
| CDH8          | -0.10 | 5.99E-01 | 0.09  | 6.48E-01 |
| FAM83E        | -0.11 | 5.65E-01 | 0.09  | 6.48E-01 |
| FRMD4A        | -0.25 | 2.02E-01 | 0.09  | 6.48E-01 |
| IFT46         | 0.14  | 4.76E-01 | -0.09 | 6.48E-01 |
| ITLN2         | -0.14 | 4.83E-01 | 0.09  | 6.48E-01 |
| KLHL8         | 0.27  | 1.59E-01 | 0.09  | 6.48E-01 |
| METTL18       | 0.14  | 4.62E-01 | -0.09 | 6.48E-01 |
| MYLPF         | -0.14 | 4.79E-01 | -0.09 | 6.48E-01 |
| RNU6-808P     | -0.15 | 4.47E-01 | 0.09  | 6.48E-01 |
| RP11-139K4.2  | -0.15 | 4.48E-01 | 0.09  | 6.48E-01 |
| RP11-22C11.2  | -0.23 | 2.42E-01 | 0.09  | 6.48E-01 |
| RP11-417B4.2  | -0.31 | 1.08E-01 | 0.09  | 6.48E-01 |
| RP11-556O9.4  | -0.06 | 7.70E-01 | -0.09 | 6.48E-01 |
| RP11-567O16.1 | -0.06 | 7.49E-01 | -0.09 | 6.48E-01 |
| RP11-598P20.3 | 0.17  | 3.88E-01 | -0.09 | 6.48E-01 |
| RP11-815J21.4 | 0.05  | 8.01E-01 | -0.09 | 6.48E-01 |
| RP4-654C18.1  | 0.07  | 7.32E-01 | -0.09 | 6.48E-01 |

|               |       |          |       |          |
|---------------|-------|----------|-------|----------|
| RPL4P3        | 0.13  | 5.21E-01 | 0.09  | 6.48E-01 |
| SNRPCP19      | -0.09 | 6.42E-01 | 0.09  | 6.48E-01 |
| SUB1          | 0.15  | 4.36E-01 | -0.09 | 6.48E-01 |
| TAS2R64P      | 0.08  | 6.70E-01 | 0.09  | 6.48E-01 |
| UBE2E1        | 0.28  | 1.55E-01 | 0.09  | 6.48E-01 |
| XPOT          | 0.24  | 2.13E-01 | 0.09  | 6.48E-01 |
| ZNF236        | -0.08 | 6.78E-01 | 0.09  | 6.48E-01 |
| AL133243.4    | -0.13 | 4.96E-01 | -0.09 | 6.49E-01 |
| CHMP4BP1      | -0.10 | 5.95E-01 | -0.09 | 6.49E-01 |
| CTD-2245F17.3 | -0.39 | 4.28E-02 | -0.09 | 6.49E-01 |
| DAP3P2        | -0.21 | 2.91E-01 | -0.09 | 6.49E-01 |
| DCN           | -0.14 | 4.68E-01 | -0.09 | 6.49E-01 |
| EEF1A1        | 0.07  | 7.11E-01 | -0.09 | 6.49E-01 |
| ERICH1        | -0.26 | 1.90E-01 | -0.09 | 6.49E-01 |
| GALK2         | 0.14  | 4.79E-01 | -0.09 | 6.49E-01 |
| HSPA8P16      | -0.17 | 3.89E-01 | -0.09 | 6.49E-01 |
| MEIS1         | -0.13 | 4.93E-01 | -0.09 | 6.49E-01 |
| MMP17         | 0.20  | 3.07E-01 | -0.09 | 6.49E-01 |
| PEX5L         | -0.19 | 3.41E-01 | -0.09 | 6.49E-01 |
| RP11-429P3.5  | -0.03 | 8.83E-01 | -0.09 | 6.49E-01 |
| RP11-522B15.3 | -0.22 | 2.69E-01 | -0.09 | 6.49E-01 |
| RP4-568C11.4  | -0.15 | 4.44E-01 | -0.09 | 6.49E-01 |
| RP5-1039K5.19 | 0.05  | 8.10E-01 | -0.09 | 6.49E-01 |
| RPS27L        | -0.03 | 8.70E-01 | -0.09 | 6.49E-01 |
| SMARCE1P1     | -0.06 | 7.73E-01 | -0.09 | 6.49E-01 |
| TMPRSS2       | -0.02 | 9.06E-01 | -0.09 | 6.49E-01 |
| TNN           | -0.04 | 8.59E-01 | -0.09 | 6.49E-01 |
| AC005517.3    | 0.02  | 9.39E-01 | 0.09  | 6.49E-01 |
| ALG11         | 0.04  | 8.59E-01 | 0.09  | 6.49E-01 |
| CCDC191       | -0.16 | 4.26E-01 | 0.09  | 6.49E-01 |
| CD83          | 0.25  | 2.05E-01 | 0.09  | 6.49E-01 |
| CDC7          | 0.33  | 8.70E-02 | 0.09  | 6.49E-01 |
| GEMIN6        | 0.27  | 1.70E-01 | 0.09  | 6.49E-01 |
| IL22RA1       | 0.08  | 6.95E-01 | 0.09  | 6.49E-01 |
| KLHL9         | 0.02  | 9.02E-01 | 0.09  | 6.49E-01 |
| PFN1          | 0.09  | 6.55E-01 | 0.09  | 6.49E-01 |
| RP11-434D9.1  | 0.09  | 6.62E-01 | 0.09  | 6.49E-01 |
| RP5-1049G16.4 | -0.24 | 2.24E-01 | 0.09  | 6.49E-01 |
| TMEM11        | -0.06 | 7.54E-01 | 0.09  | 6.49E-01 |
| UBA1          | -0.05 | 8.15E-01 | 0.09  | 6.49E-01 |
| AC005624.2    | 0.04  | 8.51E-01 | 0.09  | 6.51E-01 |
| AC073551.1    | 0.00  | 9.93E-01 | -0.09 | 6.51E-01 |
| ATG16L2       | -0.25 | 1.93E-01 | -0.09 | 6.51E-01 |
| BBC3          | -0.07 | 7.21E-01 | 0.09  | 6.51E-01 |
| CD163L1       | 0.14  | 4.83E-01 | 0.09  | 6.51E-01 |
| CLASRP        | -0.03 | 8.63E-01 | 0.09  | 6.51E-01 |
| CTD-2538G9.5  | -0.11 | 5.91E-01 | -0.09 | 6.51E-01 |

|                      |       |          |       |          |
|----------------------|-------|----------|-------|----------|
| <b>CTD-2609K8.3</b>  | 0.31  | 1.12E-01 | 0.09  | 6.51E-01 |
| <b>CTD-3138B18.5</b> | 0.15  | 4.54E-01 | -0.09 | 6.51E-01 |
| <b>DCLK2</b>         | -0.29 | 1.40E-01 | -0.09 | 6.51E-01 |
| <b>DNAJC7</b>        | 0.12  | 5.41E-01 | 0.09  | 6.51E-01 |
| <b>G34083</b>        | 0.11  | 5.86E-01 | 0.09  | 6.51E-01 |
| <b>G35542</b>        | 0.00  | 9.89E-01 | 0.09  | 6.51E-01 |
| <b>GTPBP3</b>        | -0.08 | 6.99E-01 | -0.09 | 6.51E-01 |
| <b>HOXA-AS2</b>      | 0.13  | 5.22E-01 | -0.09 | 6.51E-01 |
| <b>IDH3A</b>         | 0.21  | 2.82E-01 | 0.09  | 6.51E-01 |
| <b>IGHA1</b>         | 0.51  | 5.50E-03 | -0.09 | 6.51E-01 |
| <b>LARGE-AS1</b>     | -0.03 | 8.85E-01 | -0.09 | 6.51E-01 |
| <b>MAPKAPK3</b>      | 0.26  | 1.79E-01 | 0.09  | 6.51E-01 |
| <b>MFAP1</b>         | 0.12  | 5.38E-01 | 0.09  | 6.51E-01 |
| <b>MIR143</b>        | -0.13 | 5.24E-01 | -0.09 | 6.51E-01 |
| <b>MIR4753</b>       | 0.03  | 8.98E-01 | -0.09 | 6.51E-01 |
| <b>MUM1</b>          | 0.08  | 6.74E-01 | -0.09 | 6.51E-01 |
| <b>NAA20</b>         | -0.04 | 8.58E-01 | -0.09 | 6.51E-01 |
| <b>NEBL-AS1</b>      | -0.11 | 5.61E-01 | 0.09  | 6.51E-01 |
| <b>PKN3</b>          | -0.21 | 2.78E-01 | 0.09  | 6.51E-01 |
| <b>RBM6</b>          | -0.07 | 7.05E-01 | -0.09 | 6.51E-01 |
| <b>RP11-195F19.9</b> | -0.19 | 3.44E-01 | -0.09 | 6.51E-01 |
| <b>RP11-277B15.3</b> | -0.06 | 7.50E-01 | -0.09 | 6.51E-01 |
| <b>RP11-364L4.1</b>  | 0.03  | 8.82E-01 | -0.09 | 6.51E-01 |
| <b>RP11-464D20.6</b> | 0.05  | 8.15E-01 | 0.09  | 6.51E-01 |
| <b>RP11-480D4.7</b>  | 0.02  | 9.32E-01 | 0.09  | 6.51E-01 |
| <b>RP11-91P24.5</b>  | -0.28 | 1.52E-01 | -0.09 | 6.51E-01 |
| <b>RPL26P34</b>      | 0.15  | 4.51E-01 | 0.09  | 6.51E-01 |
| <b>SPDL1</b>         | 0.18  | 3.52E-01 | 0.09  | 6.51E-01 |
| <b>TATDN3</b>        | 0.34  | 8.00E-02 | 0.09  | 6.51E-01 |
| <b>THNSL1</b>        | 0.00  | 9.90E-01 | 0.09  | 6.51E-01 |
| <b>TIMM9P2</b>       | 0.27  | 1.58E-01 | -0.09 | 6.51E-01 |
| <b>UHMK1</b>         | 0.28  | 1.44E-01 | 0.09  | 6.51E-01 |
| <b>ATP6V0E2-AS1</b>  | 0.05  | 8.16E-01 | -0.09 | 6.52E-01 |
| <b>C15orf56</b>      | 0.03  | 8.91E-01 | 0.09  | 6.52E-01 |
| <b>CPA2</b>          | 0.25  | 1.94E-01 | 0.09  | 6.52E-01 |
| <b>CTB-91J4.1</b>    | -0.21 | 2.82E-01 | -0.09 | 6.52E-01 |
| <b>CTD-2522E6.4</b>  | 0.25  | 2.07E-01 | 0.09  | 6.52E-01 |
| <b>ELP5</b>          | 0.20  | 3.14E-01 | 0.09  | 6.52E-01 |
| <b>FAN1</b>          | -0.01 | 9.49E-01 | -0.09 | 6.52E-01 |
| <b>FBXO17</b>        | -0.05 | 8.02E-01 | 0.09  | 6.52E-01 |
| <b>HNRNPM</b>        | 0.04  | 8.27E-01 | 0.09  | 6.52E-01 |
| <b>IL18BP</b>        | -0.28 | 1.46E-01 | -0.09 | 6.52E-01 |
| <b>LRRC71</b>        | -0.18 | 3.48E-01 | 0.09  | 6.52E-01 |
| <b>MRPS7</b>         | 0.11  | 5.87E-01 | 0.09  | 6.52E-01 |
| <b>MTERF2</b>        | -0.07 | 7.12E-01 | 0.09  | 6.52E-01 |
| <b>MTMR9</b>         | 0.40  | 3.63E-02 | -0.09 | 6.52E-01 |
| <b>NIPAL2</b>        | -0.06 | 7.72E-01 | -0.09 | 6.52E-01 |

|                |       |          |       |          |
|----------------|-------|----------|-------|----------|
| NOTCH2         | -0.02 | 9.20E-01 | -0.09 | 6.52E-01 |
| REL            | 0.13  | 5.25E-01 | 0.09  | 6.52E-01 |
| RN7SL569P      | 0.03  | 8.92E-01 | -0.09 | 6.52E-01 |
| RNA5SP194      | 0.19  | 3.25E-01 | 0.09  | 6.52E-01 |
| RNU6-3P        | -0.13 | 5.12E-01 | 0.09  | 6.52E-01 |
| RP11-326I11.5  | 0.22  | 2.54E-01 | -0.09 | 6.52E-01 |
| RP11-439H8.4   | 0.12  | 5.40E-01 | -0.09 | 6.52E-01 |
| RP11-445N18.5  | 0.34  | 7.42E-02 | -0.09 | 6.52E-01 |
| RP11-848P1.3   | -0.05 | 8.00E-01 | 0.09  | 6.52E-01 |
| RP4-561L24.3   | 0.22  | 2.58E-01 | -0.09 | 6.52E-01 |
| SNORD58        | -0.09 | 6.46E-01 | -0.09 | 6.52E-01 |
| TNR            | -0.04 | 8.41E-01 | 0.09  | 6.52E-01 |
| TRIB3          | -0.03 | 8.86E-01 | -0.09 | 6.52E-01 |
| UCK2           | 0.11  | 5.68E-01 | 0.09  | 6.52E-01 |
| VTA1           | -0.02 | 9.25E-01 | -0.09 | 6.52E-01 |
| XLOC_005099    | -0.22 | 2.57E-01 | -0.09 | 6.52E-01 |
| XXYL1-AS2      | 0.23  | 2.31E-01 | -0.09 | 6.52E-01 |
| ZNF558         | 0.14  | 4.85E-01 | -0.09 | 6.52E-01 |
| AC012531.25    | 0.08  | 6.68E-01 | 0.09  | 6.53E-01 |
| AC017002.1     | -0.18 | 3.57E-01 | 0.09  | 6.53E-01 |
| ALDH7A1P2      | 0.20  | 3.06E-01 | 0.09  | 6.53E-01 |
| CFP            | -0.12 | 5.35E-01 | 0.09  | 6.53E-01 |
| CLIC3          | 0.06  | 7.50E-01 | 0.09  | 6.53E-01 |
| GAPDH          | 0.16  | 4.12E-01 | 0.09  | 6.53E-01 |
| ITGA5          | 0.00  | 9.98E-01 | 0.09  | 6.53E-01 |
| LMO1           | -0.05 | 8.09E-01 | 0.09  | 6.53E-01 |
| LSM3P4         | -0.31 | 1.14E-01 | 0.09  | 6.53E-01 |
| NFE2L2         | -0.10 | 6.07E-01 | 0.09  | 6.53E-01 |
| NTF4           | 0.02  | 9.02E-01 | 0.09  | 6.53E-01 |
| OGG1           | 0.11  | 5.73E-01 | 0.09  | 6.53E-01 |
| OR1F12         | -0.11 | 5.80E-01 | 0.09  | 6.53E-01 |
| PCNT           | -0.02 | 9.27E-01 | 0.09  | 6.53E-01 |
| RBAK           | 0.18  | 3.59E-01 | 0.09  | 6.53E-01 |
| RER1           | 0.05  | 7.99E-01 | 0.09  | 6.53E-01 |
| RP11-111A21.1  | -0.10 | 6.30E-01 | 0.09  | 6.53E-01 |
| RP11-115J16.2  | -0.04 | 8.26E-01 | 0.09  | 6.53E-01 |
| RP11-284F21.10 | -0.04 | 8.28E-01 | 0.09  | 6.53E-01 |
| RP4-704D23.1   | 0.28  | 1.52E-01 | 0.09  | 6.53E-01 |
| SURF2          | 0.13  | 5.01E-01 | 0.09  | 6.53E-01 |
| TXNDC9         | 0.13  | 5.01E-01 | 0.09  | 6.53E-01 |
| WDR25          | 0.09  | 6.46E-01 | 0.09  | 6.53E-01 |
| CACNA2D4       | 0.00  | 9.88E-01 | -0.09 | 6.53E-01 |
| DHX32          | -0.03 | 8.99E-01 | -0.09 | 6.53E-01 |
| EIF2B1         | 0.21  | 2.90E-01 | -0.09 | 6.53E-01 |
| GS1-165B14.2   | 0.07  | 7.31E-01 | -0.09 | 6.53E-01 |
| KLHL34         | -0.21 | 2.83E-01 | -0.09 | 6.53E-01 |
| LINC00614      | -0.05 | 7.86E-01 | -0.09 | 6.53E-01 |

|                |       |          |       |          |
|----------------|-------|----------|-------|----------|
| LINC01474      | -0.19 | 3.43E-01 | -0.09 | 6.53E-01 |
| PAPOLA         | 0.00  | 9.88E-01 | -0.09 | 6.53E-01 |
| RNA5SP304      | 0.30  | 1.21E-01 | -0.09 | 6.53E-01 |
| RP11-356B19.11 | -0.04 | 8.48E-01 | -0.09 | 6.53E-01 |
| RP11-498D10.3  | 0.02  | 9.20E-01 | -0.09 | 6.53E-01 |
| RP11-736N17.10 | -0.12 | 5.54E-01 | -0.09 | 6.53E-01 |
| RP13-104F24.3  | -0.09 | 6.56E-01 | -0.09 | 6.53E-01 |
| UQCRC2         | 0.15  | 4.39E-01 | -0.09 | 6.53E-01 |
| XLOC_005079    | -0.09 | 6.46E-01 | -0.09 | 6.53E-01 |
| XLOC_005411    | 0.15  | 4.49E-01 | -0.09 | 6.53E-01 |
| ZNF730         | 0.15  | 4.34E-01 | -0.09 | 6.53E-01 |
| ARSB           | 0.37  | 5.25E-02 | 0.09  | 6.54E-01 |
| ASH2L          | 0.10  | 6.11E-01 | 0.09  | 6.54E-01 |
| C8orf44-SGK3   | -0.28 | 1.53E-01 | 0.09  | 6.54E-01 |
| CCDC13         | -0.07 | 7.19E-01 | -0.09 | 6.54E-01 |
| CHCHD3         | -0.03 | 8.99E-01 | -0.09 | 6.54E-01 |
| CYP4F12        | -0.14 | 4.76E-01 | -0.09 | 6.54E-01 |
| DIP2A          | -0.05 | 8.04E-01 | -0.09 | 6.54E-01 |
| GABARAPL1      | -0.31 | 1.14E-01 | -0.09 | 6.54E-01 |
| GBP1           | 0.10  | 6.31E-01 | 0.09  | 6.54E-01 |
| GMEB2          | 0.11  | 5.90E-01 | 0.09  | 6.54E-01 |
| GPAT3          | 0.29  | 1.36E-01 | -0.09 | 6.54E-01 |
| HES2           | 0.18  | 3.66E-01 | 0.09  | 6.54E-01 |
| KCNMA1-AS1     | -0.11 | 5.68E-01 | 0.09  | 6.54E-01 |
| LIMD1          | 0.19  | 3.46E-01 | -0.09 | 6.54E-01 |
| MECR           | 0.20  | 2.99E-01 | -0.09 | 6.54E-01 |
| MIR103A2       | 0.11  | 5.92E-01 | -0.09 | 6.54E-01 |
| MIR548O2       | -0.03 | 8.62E-01 | -0.09 | 6.54E-01 |
| QPRT           | -0.15 | 4.53E-01 | -0.09 | 6.54E-01 |
| RIOK1          | 0.29  | 1.37E-01 | -0.09 | 6.54E-01 |
| RP11-468O2.1   | -0.34 | 7.39E-02 | -0.09 | 6.54E-01 |
| RP11-54O15.3   | 0.19  | 3.43E-01 | -0.09 | 6.54E-01 |
| RP11-611O2.1   | -0.24 | 2.19E-01 | 0.09  | 6.54E-01 |
| RP11-96K19.4   | 0.24  | 2.23E-01 | -0.09 | 6.54E-01 |
| RP13-228J13.1  | 0.03  | 8.88E-01 | -0.09 | 6.54E-01 |
| SLC25A22       | 0.20  | 3.18E-01 | 0.09  | 6.54E-01 |
| TAF10          | 0.07  | 7.29E-01 | 0.09  | 6.54E-01 |
| TNFRSF18       | -0.32 | 9.56E-02 | -0.09 | 6.54E-01 |
| ADGRF5P1       | 0.20  | 3.11E-01 | 0.09  | 6.55E-01 |
| AEN            | 0.26  | 1.75E-01 | 0.09  | 6.55E-01 |
| ARHGEF16       | -0.09 | 6.56E-01 | 0.09  | 6.55E-01 |
| ARPC5L         | 0.19  | 3.25E-01 | 0.09  | 6.55E-01 |
| AVPR1A         | 0.10  | 6.23E-01 | 0.09  | 6.55E-01 |
| CASP3          | 0.29  | 1.35E-01 | 0.09  | 6.55E-01 |
| CENPB          | 0.27  | 1.63E-01 | 0.09  | 6.55E-01 |
| CHMP5          | 0.15  | 4.36E-01 | 0.09  | 6.55E-01 |
| COX6CP14       | -0.18 | 3.69E-01 | 0.09  | 6.55E-01 |

|               |       |          |       |          |
|---------------|-------|----------|-------|----------|
| CTA-85E5.6    | 0.18  | 3.69E-01 | 0.09  | 6.55E-01 |
| CTC-215O4.4   | 0.05  | 8.16E-01 | 0.09  | 6.55E-01 |
| CUL4B         | 0.14  | 4.62E-01 | 0.09  | 6.55E-01 |
| DHX9          | 0.03  | 8.81E-01 | -0.09 | 6.55E-01 |
| H2AFZP4       | -0.09 | 6.38E-01 | -0.09 | 6.55E-01 |
| LARGE         | -0.23 | 2.34E-01 | -0.09 | 6.55E-01 |
| LINC01398     | 0.25  | 1.91E-01 | -0.09 | 6.55E-01 |
| MIR944        | 0.12  | 5.59E-01 | -0.09 | 6.55E-01 |
| MNT           | -0.21 | 2.80E-01 | 0.09  | 6.55E-01 |
| OGDH          | 0.12  | 5.46E-01 | 0.09  | 6.55E-01 |
| POLD3         | -0.09 | 6.64E-01 | -0.09 | 6.55E-01 |
| PRDX3P1       | -0.02 | 9.20E-01 | -0.09 | 6.55E-01 |
| RFPL3S        | -0.13 | 5.25E-01 | -0.09 | 6.55E-01 |
| RNU6-1185P    | 0.04  | 8.27E-01 | -0.09 | 6.55E-01 |
| RP11-349G13.1 | -0.02 | 9.28E-01 | -0.09 | 6.55E-01 |
| RP4-734C18.1  | 0.05  | 8.15E-01 | -0.09 | 6.55E-01 |
| SAT1          | 0.09  | 6.53E-01 | 0.09  | 6.55E-01 |
| STAG2         | 0.03  | 8.70E-01 | 0.09  | 6.55E-01 |
| TRIP11        | 0.11  | 5.83E-01 | 0.09  | 6.55E-01 |
| ZNF252P       | 0.07  | 7.25E-01 | 0.09  | 6.55E-01 |
| C12orf57      | 0.03  | 8.83E-01 | 0.09  | 6.56E-01 |
| CELSR2        | 0.27  | 1.58E-01 | 0.09  | 6.56E-01 |
| FMO1          | 0.16  | 4.12E-01 | 0.09  | 6.56E-01 |
| G2580         | 0.08  | 6.98E-01 | 0.09  | 6.56E-01 |
| G8296         | -0.10 | 6.20E-01 | 0.09  | 6.56E-01 |
| GIMAP8        | -0.26 | 1.80E-01 | 0.09  | 6.56E-01 |
| GINS2         | 0.06  | 7.50E-01 | 0.09  | 6.56E-01 |
| GPR39         | -0.23 | 2.34E-01 | 0.09  | 6.56E-01 |
| NUDT19P5      | 0.12  | 5.44E-01 | 0.09  | 6.56E-01 |
| RP11-517O13.1 | -0.33 | 8.73E-02 | 0.09  | 6.56E-01 |
| RP3-355L5.3   | 0.10  | 6.04E-01 | 0.09  | 6.56E-01 |
| RPS10P2       | 0.19  | 3.32E-01 | 0.09  | 6.56E-01 |
| RPS23         | 0.24  | 2.22E-01 | 0.09  | 6.56E-01 |
| SEMA6D        | -0.01 | 9.51E-01 | 0.09  | 6.56E-01 |
| ARL15         | -0.11 | 5.92E-01 | -0.09 | 6.56E-01 |
| BIRC6         | -0.04 | 8.31E-01 | -0.09 | 6.56E-01 |
| ETF1P2        | 0.06  | 7.49E-01 | -0.09 | 6.56E-01 |
| GPIHBP1       | 0.23  | 2.43E-01 | -0.09 | 6.56E-01 |
| GRK6P1        | -0.04 | 8.53E-01 | -0.09 | 6.56E-01 |
| RFPL1S        | 0.28  | 1.52E-01 | -0.09 | 6.56E-01 |
| RN7SL745P     | 0.19  | 3.37E-01 | -0.09 | 6.56E-01 |
| RP1-21O18.3   | -0.02 | 9.36E-01 | -0.09 | 6.56E-01 |
| RP11-354P11.2 | -0.05 | 8.15E-01 | -0.09 | 6.56E-01 |
| RP5-1112D6.8  | 0.08  | 6.94E-01 | -0.09 | 6.56E-01 |
| RP6-149D17.1  | 0.22  | 2.67E-01 | -0.09 | 6.56E-01 |
| SART3         | 0.06  | 7.44E-01 | -0.09 | 6.56E-01 |
| TMEM131       | 0.06  | 7.64E-01 | -0.09 | 6.56E-01 |

|                        |       |          |       |          |
|------------------------|-------|----------|-------|----------|
| <b>Xbac-BPG181B23.</b> | 0.15  | 4.54E-01 | -0.09 | 6.56E-01 |
| <b>XXyac-YRM2039.3</b> | -0.33 | 8.59E-02 | -0.09 | 6.56E-01 |
| <b>AC008993.2</b>      | -0.22 | 2.51E-01 | -0.09 | 6.57E-01 |
| <b>AC012314.8</b>      | -0.07 | 7.05E-01 | -0.09 | 6.57E-01 |
| <b>AC016821.1</b>      | -0.22 | 2.62E-01 | 0.09  | 6.57E-01 |
| <b>ACAP3</b>           | -0.24 | 2.14E-01 | -0.09 | 6.57E-01 |
| <b>ALDH4A1</b>         | 0.22  | 2.68E-01 | 0.09  | 6.57E-01 |
| <b>ASPSCR1</b>         | 0.13  | 5.15E-01 | -0.09 | 6.57E-01 |
| <b>C10orf82</b>        | -0.01 | 9.63E-01 | 0.09  | 6.57E-01 |
| <b>COPB2</b>           | 0.13  | 5.14E-01 | 0.09  | 6.57E-01 |
| <b>CRELD2</b>          | -0.13 | 5.25E-01 | 0.09  | 6.57E-01 |
| <b>CYP4B1</b>          | -0.23 | 2.30E-01 | -0.09 | 6.57E-01 |
| <b>DEF8</b>            | -0.03 | 8.86E-01 | 0.09  | 6.57E-01 |
| <b>FFAR2</b>           | 0.22  | 2.59E-01 | 0.09  | 6.57E-01 |
| <b>FYCO1</b>           | -0.11 | 5.74E-01 | -0.09 | 6.57E-01 |
| <b>G8227</b>           | 0.19  | 3.45E-01 | 0.09  | 6.57E-01 |
| <b>GOLGA2P7</b>        | -0.04 | 8.31E-01 | 0.09  | 6.57E-01 |
| <b>KRTAP4-9</b>        | -0.20 | 3.17E-01 | 0.09  | 6.57E-01 |
| <b>LINC00861</b>       | 0.00  | 9.99E-01 | -0.09 | 6.57E-01 |
| <b>MAPKAPK5-AS1</b>    | -0.09 | 6.49E-01 | -0.09 | 6.57E-01 |
| <b>MCPH1</b>           | 0.13  | 4.94E-01 | 0.09  | 6.57E-01 |
| <b>MRPL37</b>          | 0.03  | 8.91E-01 | 0.09  | 6.57E-01 |
| <b>NTSR1</b>           | -0.24 | 2.22E-01 | 0.09  | 6.57E-01 |
| <b>POM121L6P</b>       | -0.28 | 1.42E-01 | 0.09  | 6.57E-01 |
| <b>RP1-134E15.3</b>    | -0.08 | 6.71E-01 | -0.09 | 6.57E-01 |
| <b>RP11-27I1.6</b>     | 0.26  | 1.84E-01 | 0.09  | 6.57E-01 |
| <b>RP11-316M1.3</b>    | -0.02 | 9.05E-01 | 0.09  | 6.57E-01 |
| <b>RP11-611L7.2</b>    | -0.10 | 6.03E-01 | -0.09 | 6.57E-01 |
| <b>RP5-836J3.1</b>     | -0.19 | 3.45E-01 | -0.09 | 6.57E-01 |
| <b>RPS7P1</b>          | -0.15 | 4.52E-01 | -0.09 | 6.57E-01 |
| <b>ST3GAL4</b>         | -0.34 | 7.27E-02 | 0.09  | 6.57E-01 |
| <b>TAS2R31</b>         | 0.20  | 3.15E-01 | -0.09 | 6.57E-01 |
| <b>TLN1</b>            | -0.14 | 4.66E-01 | 0.09  | 6.57E-01 |
| <b>AC003986.6</b>      | -0.18 | 3.66E-01 | 0.09  | 6.58E-01 |
| <b>AGPAT1</b>          | -0.08 | 6.68E-01 | 0.09  | 6.58E-01 |
| <b>APBB2</b>           | 0.16  | 4.12E-01 | 0.09  | 6.58E-01 |
| <b>BOK</b>             | 0.20  | 3.00E-01 | 0.09  | 6.58E-01 |
| <b>CAPN8</b>           | 0.27  | 1.71E-01 | -0.09 | 6.58E-01 |
| <b>CHCHD2P9</b>        | 0.27  | 1.72E-01 | 0.09  | 6.58E-01 |
| <b>CTD-2081C10.7</b>   | 0.00  | 9.81E-01 | -0.09 | 6.58E-01 |
| <b>CTD-2538C1.3</b>    | -0.29 | 1.30E-01 | -0.09 | 6.58E-01 |
| <b>DARS</b>            | 0.27  | 1.66E-01 | -0.09 | 6.58E-01 |
| <b>DENND1A</b>         | 0.00  | 9.88E-01 | 0.09  | 6.58E-01 |
| <b>DNAH7</b>           | -0.27 | 1.62E-01 | -0.09 | 6.58E-01 |
| <b>FGFR3</b>           | 0.05  | 7.92E-01 | -0.09 | 6.58E-01 |
| <b>GFOD1-AS1</b>       | -0.17 | 3.89E-01 | -0.09 | 6.58E-01 |
| <b>JUND</b>            | -0.16 | 4.08E-01 | -0.09 | 6.58E-01 |

|               |       |          |       |          |
|---------------|-------|----------|-------|----------|
| KPNA4         | 0.04  | 8.27E-01 | 0.09  | 6.58E-01 |
| MID2          | -0.19 | 3.34E-01 | -0.09 | 6.58E-01 |
| MIR3135B      | -0.06 | 7.63E-01 | -0.09 | 6.58E-01 |
| MS4A4E        | -0.44 | 1.79E-02 | 0.09  | 6.58E-01 |
| PNRC1         | 0.01  | 9.44E-01 | 0.09  | 6.58E-01 |
| POMGNT2       | 0.10  | 5.99E-01 | -0.09 | 6.58E-01 |
| PPP1R21       | 0.00  | 9.92E-01 | 0.09  | 6.58E-01 |
| RP11-235E17.3 | -0.10 | 6.01E-01 | -0.09 | 6.58E-01 |
| RP11-307L3.4  | -0.02 | 9.32E-01 | -0.09 | 6.58E-01 |
| RP11-440G5.2  | 0.22  | 2.68E-01 | -0.09 | 6.58E-01 |
| RP11-697N18.3 | -0.33 | 9.04E-02 | 0.09  | 6.58E-01 |
| RP5-966M1.5   | -0.11 | 5.62E-01 | 0.09  | 6.58E-01 |
| SDF4          | 0.09  | 6.38E-01 | 0.09  | 6.58E-01 |
| SLC12A5       | -0.12 | 5.51E-01 | -0.09 | 6.58E-01 |
| TRAV21        | 0.16  | 4.10E-01 | -0.09 | 6.58E-01 |
| TRIM67        | -0.15 | 4.39E-01 | -0.09 | 6.58E-01 |
| WDR7          | -0.06 | 7.44E-01 | -0.09 | 6.58E-01 |
| XLOC_007806   | -0.22 | 2.69E-01 | -0.09 | 6.58E-01 |
| ZC3H11B       | -0.28 | 1.42E-01 | 0.09  | 6.58E-01 |
| AC005387.2    | -0.20 | 3.05E-01 | 0.09  | 6.59E-01 |
| AMICA1        | 0.19  | 3.33E-01 | 0.09  | 6.59E-01 |
| COPG2         | -0.04 | 8.51E-01 | 0.09  | 6.59E-01 |
| CPEB3         | -0.01 | 9.47E-01 | 0.09  | 6.59E-01 |
| DISC1         | -0.32 | 9.68E-02 | 0.09  | 6.59E-01 |
| DNAJC27-AS1   | 0.05  | 7.89E-01 | 0.09  | 6.59E-01 |
| ENPP6         | 0.06  | 7.75E-01 | 0.09  | 6.59E-01 |
| FBXO36-IT1    | -0.02 | 9.17E-01 | 0.09  | 6.59E-01 |
| GPR161        | 0.18  | 3.57E-01 | 0.09  | 6.59E-01 |
| NCF4          | 0.10  | 6.30E-01 | 0.09  | 6.59E-01 |
| PDE4A         | -0.11 | 5.84E-01 | 0.09  | 6.59E-01 |
| PDE9A         | 0.07  | 7.35E-01 | 0.09  | 6.59E-01 |
| PPME1         | 0.10  | 6.00E-01 | 0.09  | 6.59E-01 |
| RP11-388P9.2  | 0.06  | 7.81E-01 | 0.09  | 6.59E-01 |
| RP11-3K24.3   | -0.06 | 7.59E-01 | 0.09  | 6.59E-01 |
| RPL7AP10      | -0.08 | 6.93E-01 | 0.09  | 6.59E-01 |
| SYNDIG1       | 0.22  | 2.50E-01 | 0.09  | 6.59E-01 |
| TMSB4XP8      | 0.08  | 6.99E-01 | 0.09  | 6.59E-01 |
| CTNBL1        | 0.17  | 3.77E-01 | -0.09 | 6.59E-01 |
| G41319        | 0.08  | 6.77E-01 | -0.09 | 6.59E-01 |
| GFM2          | 0.01  | 9.50E-01 | -0.09 | 6.59E-01 |
| GMPS          | 0.06  | 7.78E-01 | -0.09 | 6.59E-01 |
| LIN7C         | 0.14  | 4.63E-01 | -0.09 | 6.59E-01 |
| LINC01623     | -0.25 | 2.08E-01 | -0.09 | 6.59E-01 |
| PCDHB2        | 0.03  | 8.67E-01 | -0.09 | 6.59E-01 |
| PLPPR5        | 0.12  | 5.51E-01 | -0.09 | 6.59E-01 |
| POT1-AS1      | 0.16  | 4.29E-01 | -0.09 | 6.59E-01 |
| RAG2          | -0.06 | 7.79E-01 | -0.09 | 6.59E-01 |



|                |       |          |       |          |
|----------------|-------|----------|-------|----------|
| RNU6V          | -0.08 | 6.97E-01 | -0.09 | 6.59E-01 |
| RP11-214K3.23  | -0.16 | 4.26E-01 | -0.09 | 6.59E-01 |
| RP11-253I19.3  | 0.25  | 2.05E-01 | -0.09 | 6.59E-01 |
| RP11-346C20.3  | 0.07  | 7.35E-01 | -0.09 | 6.59E-01 |
| RP11-416N2.4   | -0.04 | 8.49E-01 | -0.09 | 6.59E-01 |
| RP9P           | -0.14 | 4.69E-01 | -0.09 | 6.59E-01 |
| TMLHE          | -0.12 | 5.41E-01 | -0.09 | 6.59E-01 |
| UBOX5          | -0.27 | 1.59E-01 | -0.09 | 6.59E-01 |
| ZNF134         | -0.14 | 4.82E-01 | -0.09 | 6.59E-01 |
| AC006128.2     | -0.13 | 5.10E-01 | 0.09  | 6.60E-01 |
| AC009237.11    | 0.16  | 4.07E-01 | 0.09  | 6.60E-01 |
| ANKUB1         | 0.41  | 3.10E-02 | -0.09 | 6.60E-01 |
| AP003068.18    | 0.15  | 4.34E-01 | 0.09  | 6.60E-01 |
| C12orf49       | 0.16  | 4.21E-01 | 0.09  | 6.60E-01 |
| CAPN2          | 0.06  | 7.58E-01 | 0.09  | 6.60E-01 |
| CBLB           | -0.09 | 6.44E-01 | 0.09  | 6.60E-01 |
| CT45A11P       | 0.00  | 9.93E-01 | -0.09 | 6.60E-01 |
| CTD-2619J13.17 | 0.28  | 1.51E-01 | 0.09  | 6.60E-01 |
| DEPTOR         | -0.01 | 9.61E-01 | 0.09  | 6.60E-01 |
| EEF1DP1        | 0.01  | 9.53E-01 | -0.09 | 6.60E-01 |
| IZUMO4         | -0.01 | 9.63E-01 | 0.09  | 6.60E-01 |
| L2HGDH         | -0.04 | 8.46E-01 | 0.09  | 6.60E-01 |
| LCMT1-AS1      | 0.05  | 7.86E-01 | 0.09  | 6.60E-01 |
| LINC01252      | 0.11  | 5.72E-01 | -0.09 | 6.60E-01 |
| M1AP           | 0.06  | 7.66E-01 | -0.09 | 6.60E-01 |
| MTRNR2L3       | 0.07  | 7.26E-01 | 0.09  | 6.60E-01 |
| NOTCH3         | -0.02 | 9.16E-01 | 0.09  | 6.60E-01 |
| PPP4C          | 0.19  | 3.36E-01 | 0.09  | 6.60E-01 |
| RNVU1-19       | 0.39  | 3.98E-02 | 0.09  | 6.60E-01 |
| RP11-152H18.4  | -0.09 | 6.35E-01 | 0.09  | 6.60E-01 |
| RP11-257O5.2   | 0.06  | 7.73E-01 | -0.09 | 6.60E-01 |
| RP11-449P15.2  | -0.17 | 3.94E-01 | -0.09 | 6.60E-01 |
| RP11-44F21.3   | 0.36  | 5.80E-02 | 0.09  | 6.60E-01 |
| RP11-728F11.4  | -0.19 | 3.31E-01 | -0.09 | 6.60E-01 |
| RP11-823E8.3   | -0.23 | 2.48E-01 | 0.09  | 6.60E-01 |
| RPS2P7         | -0.05 | 8.18E-01 | -0.09 | 6.60E-01 |
| SEC31B         | -0.15 | 4.39E-01 | -0.09 | 6.60E-01 |
| TFF3           | 0.10  | 6.07E-01 | 0.09  | 6.60E-01 |
| TMEM72         | -0.26 | 1.79E-01 | -0.09 | 6.60E-01 |
| UBE2D3P2       | -0.17 | 3.87E-01 | 0.09  | 6.60E-01 |
| VCAN-AS1       | -0.12 | 5.42E-01 | -0.09 | 6.60E-01 |
| WDR60          | -0.17 | 3.87E-01 | 0.09  | 6.60E-01 |
| XLOC_002900    | -0.32 | 9.42E-02 | -0.09 | 6.60E-01 |
| ZNF554         | 0.17  | 3.93E-01 | 0.09  | 6.60E-01 |
| AC019064.1     | -0.10 | 6.28E-01 | -0.09 | 6.62E-01 |
| AC110781.3     | 0.02  | 9.20E-01 | -0.09 | 6.62E-01 |
| AKIRIN1        | 0.29  | 1.31E-01 | 0.09  | 6.62E-01 |

|                      |       |          |       |          |
|----------------------|-------|----------|-------|----------|
| <b>AOC2</b>          | -0.25 | 1.99E-01 | 0.09  | 6.62E-01 |
| <b>ARHGAP10</b>      | -0.02 | 9.27E-01 | -0.09 | 6.62E-01 |
| <b>ATP1B3-AS1</b>    | 0.22  | 2.66E-01 | -0.09 | 6.62E-01 |
| <b>BROX</b>          | 0.07  | 7.39E-01 | 0.09  | 6.62E-01 |
| <b>CTB-50L17.8</b>   | -0.16 | 4.16E-01 | -0.09 | 6.62E-01 |
| <b>CTC-459M5.1</b>   | -0.26 | 1.90E-01 | -0.09 | 6.62E-01 |
| <b>CYP21A1P</b>      | 0.28  | 1.56E-01 | -0.09 | 6.62E-01 |
| <b>DGKI</b>          | -0.21 | 2.74E-01 | 0.09  | 6.62E-01 |
| <b>DHRS7B</b>        | 0.20  | 3.13E-01 | -0.09 | 6.62E-01 |
| <b>EIF1AXP1</b>      | -0.08 | 6.92E-01 | -0.09 | 6.62E-01 |
| <b>ENTHD2</b>        | -0.06 | 7.46E-01 | -0.09 | 6.62E-01 |
| <b>ERCC1</b>         | 0.36  | 6.15E-02 | 0.09  | 6.62E-01 |
| <b>EXO5</b>          | -0.15 | 4.46E-01 | -0.09 | 6.62E-01 |
| <b>G13084</b>        | 0.05  | 7.86E-01 | 0.09  | 6.62E-01 |
| <b>HAUS1</b>         | -0.10 | 6.29E-01 | -0.09 | 6.62E-01 |
| <b>HSP90AB1</b>      | 0.03  | 8.97E-01 | -0.09 | 6.62E-01 |
| <b>HSP90B1</b>       | 0.06  | 7.51E-01 | -0.09 | 6.62E-01 |
| <b>LLNLR-246C6.1</b> | -0.03 | 8.86E-01 | 0.09  | 6.62E-01 |
| <b>MGAT5</b>         | 0.13  | 4.98E-01 | 0.09  | 6.62E-01 |
| <b>MIR3134</b>       | -0.23 | 2.36E-01 | -0.09 | 6.62E-01 |
| <b>MIR99A</b>        | -0.03 | 8.81E-01 | 0.09  | 6.62E-01 |
| <b>MZT1P1</b>        | -0.13 | 5.04E-01 | 0.09  | 6.62E-01 |
| <b>NECAB1</b>        | -0.18 | 3.61E-01 | -0.09 | 6.62E-01 |
| <b>PAXIP1-AS2</b>    | 0.23  | 2.45E-01 | 0.09  | 6.62E-01 |
| <b>PFAS</b>          | -0.09 | 6.53E-01 | 0.09  | 6.62E-01 |
| <b>PIPOX</b>         | -0.09 | 6.37E-01 | -0.09 | 6.62E-01 |
| <b>POLDIP2</b>       | 0.23  | 2.38E-01 | 0.09  | 6.62E-01 |
| <b>PRIMA1</b>        | -0.08 | 6.98E-01 | -0.09 | 6.62E-01 |
| <b>RNU7-124P</b>     | 0.04  | 8.23E-01 | 0.09  | 6.62E-01 |
| <b>RP1-172B20.6</b>  | -0.07 | 7.15E-01 | -0.09 | 6.62E-01 |
| <b>RP11-147I3.1</b>  | -0.16 | 4.19E-01 | -0.09 | 6.62E-01 |
| <b>RP11-214K3.20</b> | 0.05  | 8.10E-01 | -0.09 | 6.62E-01 |
| <b>RP11-248E9.5</b>  | -0.37 | 5.07E-02 | 0.09  | 6.62E-01 |
| <b>RP11-303E16.3</b> | 0.30  | 1.25E-01 | -0.09 | 6.62E-01 |
| <b>RP11-419K12.1</b> | -0.27 | 1.72E-01 | -0.09 | 6.62E-01 |
| <b>RP11-626G11.4</b> | -0.10 | 6.31E-01 | 0.09  | 6.62E-01 |
| <b>RP11-666A8.7</b>  | -0.28 | 1.44E-01 | 0.09  | 6.62E-01 |
| <b>RP11-77H9.8</b>   | 0.29  | 1.34E-01 | 0.09  | 6.62E-01 |
| <b>RP5-867C24.4</b>  | 0.16  | 4.09E-01 | -0.09 | 6.62E-01 |
| <b>RPL31P58</b>      | 0.10  | 5.98E-01 | -0.09 | 6.62E-01 |
| <b>SMPD4</b>         | 0.18  | 3.66E-01 | -0.09 | 6.62E-01 |
| <b>XLOC_006333</b>   | 0.00  | 9.90E-01 | 0.09  | 6.62E-01 |
| <b>ZNF607</b>        | 0.18  | 3.51E-01 | -0.09 | 6.62E-01 |
| <b>7SK</b>           | -0.12 | 5.40E-01 | -0.09 | 6.63E-01 |
| <b>AP004289.1</b>    | 0.21  | 2.93E-01 | 0.09  | 6.63E-01 |
| <b>CBX2</b>          | 0.10  | 6.05E-01 | 0.09  | 6.63E-01 |
| <b>CCDC140</b>       | -0.16 | 4.24E-01 | -0.09 | 6.63E-01 |

|               |       |          |       |          |
|---------------|-------|----------|-------|----------|
| CCDC167       | 0.21  | 2.86E-01 | 0.09  | 6.63E-01 |
| CTB-174D11.2  | -0.21 | 2.78E-01 | 0.09  | 6.63E-01 |
| CUL4A         | 0.28  | 1.52E-01 | 0.09  | 6.63E-01 |
| EIF2D         | 0.05  | 8.12E-01 | -0.09 | 6.63E-01 |
| G26246        | -0.11 | 5.64E-01 | -0.09 | 6.63E-01 |
| GMDS          | -0.11 | 5.71E-01 | 0.09  | 6.63E-01 |
| GPBAR1        | -0.01 | 9.72E-01 | 0.09  | 6.63E-01 |
| MATN3         | 0.17  | 3.83E-01 | 0.09  | 6.63E-01 |
| MBNL1-AS1     | -0.03 | 8.94E-01 | -0.09 | 6.63E-01 |
| NRG1          | 0.01  | 9.50E-01 | 0.09  | 6.63E-01 |
| PAIP2B        | -0.02 | 9.02E-01 | -0.09 | 6.63E-01 |
| PTGES3P2      | -0.19 | 3.34E-01 | -0.09 | 6.63E-01 |
| ROMO1         | 0.10  | 6.12E-01 | 0.09  | 6.63E-01 |
| RP11-197N18.7 | -0.34 | 7.32E-02 | 0.09  | 6.63E-01 |
| RP11-250B2.3  | -0.30 | 1.15E-01 | -0.09 | 6.63E-01 |
| RP11-44F14.8  | 0.13  | 5.18E-01 | -0.09 | 6.63E-01 |
| RP11-493E12.1 | 0.15  | 4.60E-01 | 0.09  | 6.63E-01 |
| RP11-692N5.2  | -0.09 | 6.48E-01 | 0.09  | 6.63E-01 |
| RP6-159A1.4   | -0.24 | 2.23E-01 | -0.09 | 6.63E-01 |
| RPL10AP6      | -0.02 | 9.34E-01 | 0.09  | 6.63E-01 |
| STX17-AS1     | -0.01 | 9.57E-01 | -0.09 | 6.63E-01 |
| SYT15         | 0.30  | 1.16E-01 | -0.09 | 6.63E-01 |
| TBC1D30       | 0.21  | 2.84E-01 | 0.09  | 6.63E-01 |
| XLOC_005539   | 0.10  | 5.98E-01 | -0.09 | 6.63E-01 |
| ZSCAN32       | 0.19  | 3.45E-01 | -0.09 | 6.63E-01 |
| AC007126.1    | -0.08 | 7.01E-01 | -0.09 | 6.64E-01 |
| AC007292.6    | -0.21 | 2.81E-01 | -0.09 | 6.64E-01 |
| AC007319.1    | 0.18  | 3.60E-01 | -0.09 | 6.64E-01 |
| BCAS3         | -0.25 | 2.09E-01 | -0.09 | 6.64E-01 |
| CIT           | -0.02 | 9.21E-01 | -0.09 | 6.64E-01 |
| FUCA1         | 0.03  | 8.93E-01 | -0.09 | 6.64E-01 |
| G11195        | -0.31 | 1.10E-01 | -0.09 | 6.64E-01 |
| HSPB6         | -0.10 | 6.10E-01 | -0.09 | 6.64E-01 |
| JAKMIP3       | -0.17 | 3.73E-01 | -0.09 | 6.64E-01 |
| MAP3K4        | -0.01 | 9.56E-01 | -0.09 | 6.64E-01 |
| MIR574        | 0.14  | 4.71E-01 | -0.09 | 6.64E-01 |
| RP11-461F16.3 | -0.05 | 8.12E-01 | -0.09 | 6.64E-01 |
| RP11-867G2.4  | -0.15 | 4.54E-01 | -0.09 | 6.64E-01 |
| SH3GLB2       | -0.08 | 6.76E-01 | -0.09 | 6.64E-01 |
| TJAP1         | 0.07  | 7.06E-01 | -0.09 | 6.64E-01 |
| XLOC_005856   | -0.18 | 3.62E-01 | -0.09 | 6.64E-01 |
| ZDHC11        | -0.28 | 1.53E-01 | -0.09 | 6.64E-01 |
| AC130709.1    | 0.11  | 5.85E-01 | 0.09  | 6.64E-01 |
| CBX3P9        | 0.06  | 7.75E-01 | 0.09  | 6.64E-01 |
| CTD-3222D19.7 | 0.03  | 8.68E-01 | 0.09  | 6.64E-01 |
| DISC1FP1      | -0.14 | 4.83E-01 | 0.09  | 6.64E-01 |
| EIF5P1        | -0.12 | 5.33E-01 | 0.09  | 6.64E-01 |

|                |       |          |       |          |
|----------------|-------|----------|-------|----------|
| EN1            | 0.28  | 1.54E-01 | 0.09  | 6.64E-01 |
| NELFB          | 0.21  | 2.83E-01 | 0.09  | 6.64E-01 |
| POLR1E         | 0.14  | 4.74E-01 | 0.09  | 6.64E-01 |
| PRDX2          | 0.00  | 9.94E-01 | 0.09  | 6.64E-01 |
| RFX8           | -0.12 | 5.29E-01 | 0.09  | 6.64E-01 |
| RN7SL128P      | -0.06 | 7.70E-01 | 0.09  | 6.64E-01 |
| RP11-12A20.7   | 0.14  | 4.70E-01 | 0.09  | 6.64E-01 |
| RP11-263C24.1  | -0.08 | 6.96E-01 | 0.09  | 6.64E-01 |
| RP11-576N17.3  | -0.23 | 2.42E-01 | 0.09  | 6.64E-01 |
| RP11-967K21.1  | -0.43 | 2.25E-02 | 0.09  | 6.64E-01 |
| RPS28          | 0.40  | 3.62E-02 | 0.09  | 6.64E-01 |
| ZZEF1          | -0.07 | 7.31E-01 | 0.09  | 6.64E-01 |
| AC004893.10    | 0.12  | 5.51E-01 | -0.09 | 6.65E-01 |
| AC005162.4     | -0.04 | 8.56E-01 | -0.09 | 6.65E-01 |
| AC005264.2     | 0.30  | 1.27E-01 | -0.09 | 6.65E-01 |
| AC073333.8     | -0.26 | 1.82E-01 | -0.09 | 6.65E-01 |
| ADORA2B        | 0.29  | 1.29E-01 | -0.09 | 6.65E-01 |
| C15orf65       | 0.09  | 6.67E-01 | 0.09  | 6.65E-01 |
| C6orf120       | 0.21  | 2.91E-01 | -0.09 | 6.65E-01 |
| CD72           | -0.29 | 1.41E-01 | 0.09  | 6.65E-01 |
| CELF4          | -0.13 | 5.14E-01 | -0.09 | 6.65E-01 |
| CTD-3113P16.11 | -0.18 | 3.64E-01 | 0.09  | 6.65E-01 |
| DROSHA         | -0.17 | 3.79E-01 | 0.09  | 6.65E-01 |
| ERI3           | 0.04  | 8.25E-01 | -0.09 | 6.65E-01 |
| LINC00483      | 0.18  | 3.48E-01 | 0.09  | 6.65E-01 |
| LINC01372      | 0.10  | 6.02E-01 | 0.09  | 6.65E-01 |
| PGM5           | -0.09 | 6.56E-01 | -0.09 | 6.65E-01 |
| RNU6-331P      | 0.34  | 7.46E-02 | -0.09 | 6.65E-01 |
| RP1-267D11.6   | -0.13 | 5.04E-01 | 0.09  | 6.65E-01 |
| RP1-86C11.7    | -0.15 | 4.37E-01 | -0.09 | 6.65E-01 |
| RP11-114H23.2  | 0.23  | 2.47E-01 | -0.09 | 6.65E-01 |
| RP11-164H5.1   | 0.02  | 9.00E-01 | -0.09 | 6.65E-01 |
| RP11-217L21.1  | 0.02  | 9.22E-01 | -0.09 | 6.65E-01 |
| RP11-227G15.8  | -0.28 | 1.56E-01 | -0.09 | 6.65E-01 |
| RP11-231E6.1   | -0.13 | 5.00E-01 | -0.09 | 6.65E-01 |
| RP11-418H16.1  | -0.04 | 8.44E-01 | 0.09  | 6.65E-01 |
| RP11-650K20.2  | -0.11 | 5.72E-01 | 0.09  | 6.65E-01 |
| RP11-932O9.9   | 0.14  | 4.86E-01 | -0.09 | 6.65E-01 |
| SH3BP4         | -0.05 | 8.15E-01 | -0.09 | 6.65E-01 |
| SNORD105B      | 0.03  | 8.91E-01 | -0.09 | 6.65E-01 |
| SRGAP2B        | -0.26 | 1.74E-01 | 0.09  | 6.65E-01 |
| SSC5D          | -0.32 | 9.18E-02 | -0.09 | 6.65E-01 |
| TBX21          | 0.23  | 2.37E-01 | 0.09  | 6.65E-01 |
| TIMM13         | 0.04  | 8.40E-01 | 0.09  | 6.65E-01 |
| VN1R108P       | -0.09 | 6.67E-01 | -0.09 | 6.65E-01 |
| ZKSCAN8        | 0.04  | 8.30E-01 | -0.09 | 6.65E-01 |
| ZNF483         | -0.13 | 5.24E-01 | -0.09 | 6.65E-01 |

|               |       |          |       |          |
|---------------|-------|----------|-------|----------|
| ZNF778        | 0.26  | 1.87E-01 | -0.09 | 6.65E-01 |
| A1BG          | -0.09 | 6.53E-01 | 0.09  | 6.66E-01 |
| AC007386.3    | 0.01  | 9.64E-01 | -0.09 | 6.66E-01 |
| AC015815.2    | 0.09  | 6.61E-01 | 0.09  | 6.66E-01 |
| AC074367.1    | 0.09  | 6.45E-01 | -0.09 | 6.66E-01 |
| AP000593.7    | 0.06  | 7.51E-01 | 0.09  | 6.66E-01 |
| CCDC148       | 0.00  | 9.92E-01 | -0.09 | 6.66E-01 |
| CDCA7         | -0.09 | 6.40E-01 | 0.09  | 6.66E-01 |
| CLIC2         | 0.03  | 8.71E-01 | -0.09 | 6.66E-01 |
| CTC-518B2.10  | 0.17  | 3.87E-01 | 0.09  | 6.66E-01 |
| DNAJC3-AS1    | -0.03 | 8.76E-01 | -0.09 | 6.66E-01 |
| FAM66A        | 0.30  | 1.23E-01 | 0.09  | 6.66E-01 |
| GLUD1P3       | 0.07  | 7.40E-01 | -0.09 | 6.66E-01 |
| LDAH          | 0.31  | 1.09E-01 | 0.09  | 6.66E-01 |
| MIR3137       | 0.18  | 3.72E-01 | -0.09 | 6.66E-01 |
| MUC21         | 0.19  | 3.34E-01 | -0.09 | 6.66E-01 |
| MXRA5Y        | 0.04  | 8.50E-01 | 0.09  | 6.66E-01 |
| PBK           | 0.10  | 6.24E-01 | -0.09 | 6.66E-01 |
| PIGU          | 0.02  | 9.02E-01 | -0.09 | 6.66E-01 |
| QRICH1        | -0.18 | 3.70E-01 | -0.09 | 6.66E-01 |
| RNU1-134P     | 0.16  | 4.12E-01 | -0.09 | 6.66E-01 |
| RNU6-608P     | -0.22 | 2.71E-01 | -0.09 | 6.66E-01 |
| RP1-122O8.7   | 0.16  | 4.04E-01 | 0.09  | 6.66E-01 |
| RP11-111E14.1 | -0.32 | 9.96E-02 | -0.09 | 6.66E-01 |
| RP11-295I5.4  | -0.06 | 7.49E-01 | -0.09 | 6.66E-01 |
| RP11-337C18.9 | -0.03 | 8.70E-01 | -0.09 | 6.66E-01 |
| RP11-384B12.3 | -0.08 | 7.03E-01 | -0.09 | 6.66E-01 |
| RP11-477I4.4  | -0.13 | 5.05E-01 | -0.09 | 6.66E-01 |
| RP11-481J2.4  | 0.16  | 4.04E-01 | 0.09  | 6.66E-01 |
| RP11-483F11.7 | -0.26 | 1.78E-01 | 0.09  | 6.66E-01 |
| RP11-543P15.1 | -0.10 | 6.01E-01 | -0.09 | 6.66E-01 |
| RP11-797A18.5 | -0.10 | 6.02E-01 | -0.09 | 6.66E-01 |
| RP3-331H24.6  | -0.27 | 1.70E-01 | 0.09  | 6.66E-01 |
| RP4-686C3.7   | -0.10 | 6.30E-01 | 0.09  | 6.66E-01 |
| SIRPAP1       | 0.08  | 6.89E-01 | -0.09 | 6.66E-01 |
| STMN1         | 0.17  | 3.96E-01 | -0.09 | 6.66E-01 |
| TNFRSF19      | -0.08 | 7.02E-01 | 0.09  | 6.66E-01 |
| TUFM          | 0.15  | 4.39E-01 | 0.09  | 6.66E-01 |
| ZNF599        | 0.06  | 7.73E-01 | -0.09 | 6.66E-01 |
| AC006077.3    | -0.06 | 7.79E-01 | 0.09  | 6.67E-01 |
| AC032027.1    | 0.12  | 5.29E-01 | -0.09 | 6.67E-01 |
| AC093159.1    | 0.23  | 2.40E-01 | -0.09 | 6.67E-01 |
| AKT2          | 0.35  | 6.84E-02 | 0.09  | 6.67E-01 |
| ANKRD62       | 0.09  | 6.66E-01 | 0.09  | 6.67E-01 |
| ATP5I         | 0.36  | 6.11E-02 | 0.09  | 6.67E-01 |
| CCNI          | 0.20  | 3.00E-01 | 0.09  | 6.67E-01 |
| CENPE         | -0.02 | 9.29E-01 | 0.09  | 6.67E-01 |

|                      |       |          |       |          |
|----------------------|-------|----------|-------|----------|
| <b>CREG1</b>         | 0.22  | 2.68E-01 | 0.09  | 6.67E-01 |
| <b>CTC-360G5.9</b>   | 0.08  | 6.89E-01 | -0.09 | 6.67E-01 |
| <b>CTC-429P9.1</b>   | 0.12  | 5.46E-01 | -0.09 | 6.67E-01 |
| <b>CTC-429P9.3</b>   | -0.18 | 3.49E-01 | -0.09 | 6.67E-01 |
| <b>DSEL</b>          | -0.19 | 3.37E-01 | -0.09 | 6.67E-01 |
| <b>G25704</b>        | 0.01  | 9.71E-01 | -0.09 | 6.67E-01 |
| <b>G31519</b>        | -0.05 | 7.98E-01 | 0.09  | 6.67E-01 |
| <b>GOLGA1</b>        | 0.30  | 1.20E-01 | 0.09  | 6.67E-01 |
| <b>HERC2P3</b>       | 0.08  | 7.04E-01 | -0.09 | 6.67E-01 |
| <b>IGKV3-20</b>      | 0.45  | 1.57E-02 | 0.09  | 6.67E-01 |
| <b>IGSF9B</b>        | 0.01  | 9.57E-01 | 0.09  | 6.67E-01 |
| <b>INTS8</b>         | -0.16 | 4.09E-01 | -0.09 | 6.67E-01 |
| <b>LINC00607</b>     | -0.34 | 7.34E-02 | 0.09  | 6.67E-01 |
| <b>NDUFA5P11</b>     | -0.43 | 2.39E-02 | -0.09 | 6.67E-01 |
| <b>OPRK1</b>         | -0.11 | 5.74E-01 | 0.09  | 6.67E-01 |
| <b>PHKA1-AS1</b>     | 0.34  | 7.59E-02 | 0.09  | 6.67E-01 |
| <b>PRPF8</b>         | 0.03  | 8.70E-01 | -0.09 | 6.67E-01 |
| <b>RGS17</b>         | -0.06 | 7.72E-01 | -0.09 | 6.67E-01 |
| <b>RP11-388P9.3</b>  | 0.02  | 9.06E-01 | -0.09 | 6.67E-01 |
| <b>RP11-467I17.1</b> | -0.08 | 6.90E-01 | -0.09 | 6.67E-01 |
| <b>RP11-49O14.3</b>  | -0.04 | 8.50E-01 | 0.09  | 6.67E-01 |
| <b>RP11-533E19.5</b> | -0.21 | 2.74E-01 | 0.09  | 6.67E-01 |
| <b>RP5-1014D13.2</b> | 0.12  | 5.36E-01 | -0.09 | 6.67E-01 |
| <b>SNORD64</b>       | -0.19 | 3.45E-01 | 0.09  | 6.67E-01 |
| <b>SPINT2</b>        | 0.16  | 4.02E-01 | 0.09  | 6.67E-01 |
| <b>TAS1R1</b>        | -0.19 | 3.46E-01 | -0.09 | 6.67E-01 |
| <b>TNRC6B</b>        | -0.10 | 6.08E-01 | 0.09  | 6.67E-01 |
| <b>UPK3BP1</b>       | -0.12 | 5.31E-01 | -0.09 | 6.67E-01 |
| <b>XLOC_002344</b>   | 0.00  | 9.91E-01 | -0.09 | 6.67E-01 |
| <b>XLOC_003985</b>   | -0.05 | 7.87E-01 | -0.09 | 6.67E-01 |
| <b>XLOC_007753</b>   | -0.31 | 1.05E-01 | -0.09 | 6.67E-01 |
| <b>ZNF496</b>        | 0.08  | 6.87E-01 | -0.09 | 6.67E-01 |
| <b>AB015752.3</b>    | -0.01 | 9.48E-01 | 0.09  | 6.68E-01 |
| <b>AC007679.3</b>    | 0.27  | 1.69E-01 | 0.09  | 6.68E-01 |
| <b>AC016910.1</b>    | 0.19  | 3.34E-01 | -0.09 | 6.68E-01 |
| <b>ACAT1</b>         | -0.11 | 5.88E-01 | -0.09 | 6.68E-01 |
| <b>ACBD7</b>         | 0.09  | 6.60E-01 | 0.09  | 6.68E-01 |
| <b>ADM</b>           | -0.23 | 2.43E-01 | 0.09  | 6.68E-01 |
| <b>C1orf109</b>      | 0.37  | 5.56E-02 | -0.09 | 6.68E-01 |
| <b>C6</b>            | -0.12 | 5.31E-01 | -0.09 | 6.68E-01 |
| <b>CDK2AP2</b>       | -0.02 | 9.09E-01 | 0.09  | 6.68E-01 |
| <b>CENPA</b>         | 0.08  | 6.79E-01 | 0.09  | 6.68E-01 |
| <b>CTD-2035E11.5</b> | -0.01 | 9.45E-01 | -0.09 | 6.68E-01 |
| <b>GALE</b>          | 0.17  | 3.97E-01 | 0.09  | 6.68E-01 |
| <b>KLF10</b>         | 0.03  | 8.75E-01 | -0.09 | 6.68E-01 |
| <b>LA16c-380F5.1</b> | 0.11  | 5.85E-01 | -0.09 | 6.68E-01 |
| <b>LCLAT1</b>        | 0.10  | 6.26E-01 | 0.09  | 6.68E-01 |

|               |       |          |       |          |
|---------------|-------|----------|-------|----------|
| LIMS2         | -0.38 | 4.62E-02 | 0.09  | 6.68E-01 |
| LINC00467     | 0.13  | 4.97E-01 | 0.09  | 6.68E-01 |
| LPAR2         | -0.26 | 1.80E-01 | -0.09 | 6.68E-01 |
| NDUFA10       | -0.09 | 6.40E-01 | 0.09  | 6.68E-01 |
| NDUFB4P1      | -0.14 | 4.93E-01 | -0.09 | 6.68E-01 |
| NISCH         | 0.01  | 9.55E-01 | 0.09  | 6.68E-01 |
| NKX6-2        | 0.01  | 9.74E-01 | 0.09  | 6.68E-01 |
| OXCT2P1       | 0.07  | 7.24E-01 | 0.09  | 6.68E-01 |
| PAX1          | -0.01 | 9.53E-01 | 0.09  | 6.68E-01 |
| PPP1R9A       | -0.30 | 1.18E-01 | -0.09 | 6.68E-01 |
| RMND5A        | 0.09  | 6.54E-01 | 0.09  | 6.68E-01 |
| RN7SL370P     | -0.06 | 7.50E-01 | -0.09 | 6.68E-01 |
| RN7SL689P     | 0.05  | 7.83E-01 | -0.09 | 6.68E-01 |
| RP11-193H22.2 | 0.27  | 1.68E-01 | 0.09  | 6.68E-01 |
| RP11-466A19.5 | -0.19 | 3.37E-01 | 0.09  | 6.68E-01 |
| RP11-5G9.5    | -0.26 | 1.80E-01 | 0.09  | 6.68E-01 |
| RP11-887P2.5  | 0.05  | 7.86E-01 | -0.09 | 6.68E-01 |
| RP11-8L18.3   | -0.10 | 6.22E-01 | 0.09  | 6.68E-01 |
| SLC26A4       | -0.14 | 4.79E-01 | -0.09 | 6.68E-01 |
| SNRNP48       | 0.16  | 4.18E-01 | -0.09 | 6.68E-01 |
| UBE2V2P4      | 0.08  | 6.71E-01 | -0.09 | 6.68E-01 |
| WDR34         | -0.06 | 7.66E-01 | 0.09  | 6.68E-01 |
| XLOC_008895   | 0.00  | 9.91E-01 | -0.09 | 6.68E-01 |
| ZBTB14        | -0.04 | 8.54E-01 | 0.09  | 6.68E-01 |
| ZNF155        | 0.16  | 4.15E-01 | 0.09  | 6.68E-01 |
| ZNF696        | 0.01  | 9.59E-01 | 0.09  | 6.68E-01 |
| ZNHIT6        | 0.05  | 7.87E-01 | -0.09 | 6.68E-01 |
| AC007131.2    | 0.09  | 6.58E-01 | 0.09  | 6.69E-01 |
| FLCN          | -0.07 | 7.13E-01 | 0.09  | 6.69E-01 |
| G17690        | -0.02 | 9.16E-01 | 0.09  | 6.69E-01 |
| GATAD2A       | 0.19  | 3.40E-01 | 0.09  | 6.69E-01 |
| KLHL25        | 0.05  | 7.93E-01 | 0.09  | 6.69E-01 |
| RABEPK        | 0.06  | 7.43E-01 | 0.09  | 6.69E-01 |
| RP11-164P12.3 | -0.25 | 1.98E-01 | 0.09  | 6.69E-01 |
| RP11-330L19.2 | -0.20 | 2.98E-01 | 0.09  | 6.69E-01 |
| RP11-93O14.1  | -0.12 | 5.40E-01 | 0.09  | 6.69E-01 |
| TUBA3D        | 0.05  | 7.83E-01 | 0.09  | 6.69E-01 |
| ASNS          | 0.06  | 7.73E-01 | -0.09 | 6.69E-01 |
| CLSTN3        | 0.09  | 6.61E-01 | -0.09 | 6.69E-01 |
| DENND4C       | -0.10 | 6.16E-01 | -0.09 | 6.69E-01 |
| EDAR          | -0.31 | 1.13E-01 | -0.09 | 6.69E-01 |
| FEN1          | 0.04  | 8.41E-01 | -0.09 | 6.69E-01 |
| G10734        | -0.28 | 1.43E-01 | -0.09 | 6.69E-01 |
| KPNA1         | 0.08  | 6.93E-01 | -0.09 | 6.69E-01 |
| KRT18P63      | -0.13 | 5.19E-01 | -0.09 | 6.69E-01 |
| MIR4442       | -0.02 | 9.13E-01 | -0.09 | 6.69E-01 |
| MIR497HG      | -0.05 | 7.86E-01 | -0.09 | 6.69E-01 |

|               |       |          |       |          |
|---------------|-------|----------|-------|----------|
| MIR659        | -0.17 | 3.92E-01 | -0.09 | 6.69E-01 |
| RAD18         | 0.16  | 4.18E-01 | -0.09 | 6.69E-01 |
| RP11-334J6.6  | -0.58 | 1.31E-03 | -0.09 | 6.69E-01 |
| RP11-543C4.1  | 0.05  | 7.95E-01 | -0.09 | 6.69E-01 |
| RP11-635N19.1 | -0.20 | 3.12E-01 | -0.09 | 6.69E-01 |
| RP3-522J7.7   | -0.49 | 8.03E-03 | -0.09 | 6.69E-01 |
| SEPT14P12     | 0.02  | 9.22E-01 | -0.09 | 6.69E-01 |
| SMARCD1       | 0.24  | 2.26E-01 | -0.09 | 6.69E-01 |
| STK19         | -0.30 | 1.20E-01 | -0.09 | 6.69E-01 |
| TARBP1        | -0.21 | 2.75E-01 | -0.09 | 6.69E-01 |
| TPM4          | -0.02 | 9.31E-01 | -0.09 | 6.69E-01 |
| ALG9-IT1      | -0.16 | 4.04E-01 | -0.09 | 6.70E-01 |
| ANKRD42       | -0.18 | 3.59E-01 | -0.09 | 6.70E-01 |
| ASS1P1        | -0.29 | 1.40E-01 | 0.09  | 6.70E-01 |
| BRE           | 0.11  | 5.85E-01 | 0.09  | 6.70E-01 |
| CCDC120       | -0.08 | 6.90E-01 | 0.09  | 6.70E-01 |
| CCT4          | 0.01  | 9.69E-01 | -0.09 | 6.70E-01 |
| CD1B          | 0.25  | 2.08E-01 | 0.09  | 6.70E-01 |
| CTD-2218G20.2 | -0.07 | 7.39E-01 | -0.09 | 6.70E-01 |
| DNMT3B        | 0.44  | 2.02E-02 | -0.09 | 6.70E-01 |
| G38985        | -0.14 | 4.82E-01 | -0.09 | 6.70E-01 |
| HIST3H2A      | -0.20 | 3.19E-01 | -0.09 | 6.70E-01 |
| HLA-DRA       | 0.23  | 2.35E-01 | 0.09  | 6.70E-01 |
| HMG2P5        | -0.23 | 2.35E-01 | 0.09  | 6.70E-01 |
| HYI           | -0.07 | 7.29E-01 | -0.09 | 6.70E-01 |
| KRT23         | -0.15 | 4.60E-01 | -0.09 | 6.70E-01 |
| LARS2         | 0.19  | 3.30E-01 | 0.09  | 6.70E-01 |
| NUP37         | 0.12  | 5.31E-01 | 0.09  | 6.70E-01 |
| PIK3C2A       | 0.29  | 1.34E-01 | 0.09  | 6.70E-01 |
| PPP1R11       | 0.15  | 4.59E-01 | 0.09  | 6.70E-01 |
| PRMT5         | 0.24  | 2.14E-01 | 0.09  | 6.70E-01 |
| PSMA5         | 0.22  | 2.66E-01 | 0.09  | 6.70E-01 |
| RP11-120K19.4 | -0.07 | 7.27E-01 | 0.09  | 6.70E-01 |
| RP11-292F9.1  | -0.18 | 3.70E-01 | 0.09  | 6.70E-01 |
| RP11-320N7.2  | -0.30 | 1.16E-01 | -0.09 | 6.70E-01 |
| RP11-593F23.1 | -0.11 | 5.93E-01 | 0.09  | 6.70E-01 |
| RP11-632K20.2 | -0.05 | 8.14E-01 | 0.09  | 6.70E-01 |
| RP11-685B24.1 | 0.15  | 4.57E-01 | -0.09 | 6.70E-01 |
| RP11-69M1.6   | -0.10 | 6.14E-01 | 0.09  | 6.70E-01 |
| RP11-719K4.7  | 0.03  | 8.69E-01 | 0.09  | 6.70E-01 |
| RP4-751H13.5  | -0.22 | 2.68E-01 | 0.09  | 6.70E-01 |
| SLC5A3        | 0.06  | 7.79E-01 | 0.09  | 6.70E-01 |
| SMIM7         | 0.08  | 6.87E-01 | 0.09  | 6.70E-01 |
| TNFRSF1A      | 0.10  | 6.26E-01 | 0.09  | 6.70E-01 |
| UBAP1L        | -0.20 | 3.18E-01 | -0.09 | 6.70E-01 |
| XLOC_005040   | -0.14 | 4.75E-01 | -0.09 | 6.70E-01 |
| ZNF574        | -0.01 | 9.49E-01 | 0.09  | 6.70E-01 |



|                |       |          |       |          |
|----------------|-------|----------|-------|----------|
| AC005304.1     | 0.15  | 4.54E-01 | -0.09 | 6.71E-01 |
| AC005593.2     | -0.37 | 5.21E-02 | -0.09 | 6.71E-01 |
| AC126544.4     | -0.42 | 2.65E-02 | -0.09 | 6.71E-01 |
| ACTG1P3        | -0.11 | 5.67E-01 | 0.09  | 6.71E-01 |
| ALDH1A3        | 0.33  | 8.21E-02 | -0.09 | 6.71E-01 |
| CAPZB          | 0.03  | 8.94E-01 | 0.09  | 6.71E-01 |
| CEBPZ          | 0.04  | 8.46E-01 | 0.09  | 6.71E-01 |
| CTD-2165H16.3  | -0.05 | 8.12E-01 | 0.09  | 6.71E-01 |
| FCRL3          | -0.23 | 2.50E-01 | 0.09  | 6.71E-01 |
| G12578         | -0.04 | 8.53E-01 | -0.09 | 6.71E-01 |
| GBP1P1         | 0.04  | 8.54E-01 | -0.09 | 6.71E-01 |
| HIST1H2AC      | -0.13 | 5.03E-01 | 0.09  | 6.71E-01 |
| INPP5B         | -0.01 | 9.50E-01 | -0.09 | 6.71E-01 |
| LINC00968      | -0.17 | 3.75E-01 | 0.09  | 6.71E-01 |
| MAST4-AS1      | -0.15 | 4.44E-01 | -0.09 | 6.71E-01 |
| RAD51AP1       | 0.18  | 3.66E-01 | -0.09 | 6.71E-01 |
| RN7SL20P       | -0.15 | 4.45E-01 | 0.09  | 6.71E-01 |
| RNU6-987P      | 0.16  | 4.25E-01 | -0.09 | 6.71E-01 |
| RP11-1060J15.9 | -0.11 | 5.60E-01 | 0.09  | 6.71E-01 |
| RP11-10L12.4   | -0.01 | 9.55E-01 | -0.09 | 6.71E-01 |
| RP11-1399P15.1 | -0.01 | 9.58E-01 | 0.09  | 6.71E-01 |
| RP11-321F6.2   | -0.32 | 1.02E-01 | 0.09  | 6.71E-01 |
| RP11-325E5.4   | -0.09 | 6.63E-01 | 0.09  | 6.71E-01 |
| RP11-472B18.1  | 0.32  | 9.33E-02 | -0.09 | 6.71E-01 |
| RP11-483C6.1   | 0.08  | 6.99E-01 | -0.09 | 6.71E-01 |
| RP11-73G16.3   | -0.28 | 1.42E-01 | 0.09  | 6.71E-01 |
| RP11-90P5.1    | 0.01  | 9.48E-01 | 0.09  | 6.71E-01 |
| RP13-467H17.1  | 0.27  | 1.66E-01 | -0.09 | 6.71E-01 |
| RPL21P23       | -0.08 | 6.95E-01 | -0.09 | 6.71E-01 |
| SNORD116-26    | 0.01  | 9.50E-01 | 0.09  | 6.71E-01 |
| TMEM72-AS1     | 0.08  | 6.80E-01 | -0.09 | 6.71E-01 |
| ZBTB3          | 0.04  | 8.28E-01 | 0.09  | 6.71E-01 |
| ZNF569         | 0.13  | 5.21E-01 | -0.09 | 6.71E-01 |
| ZRANB2-AS2     | -0.35 | 7.10E-02 | -0.09 | 6.71E-01 |
| ANAPC13        | 0.17  | 3.82E-01 | 0.09  | 6.73E-01 |
| BIN1           | 0.03  | 8.91E-01 | 0.09  | 6.73E-01 |
| C1orf186       | 0.16  | 4.21E-01 | 0.09  | 6.73E-01 |
| CADM4          | -0.04 | 8.27E-01 | 0.09  | 6.73E-01 |
| CCNE2          | -0.27 | 1.59E-01 | -0.09 | 6.73E-01 |
| CLK4           | 0.01  | 9.69E-01 | -0.09 | 6.73E-01 |
| COL1A1         | -0.04 | 8.43E-01 | 0.09  | 6.73E-01 |
| CPT1B          | -0.06 | 7.48E-01 | -0.09 | 6.73E-01 |
| CTD-3193O13.12 | 0.07  | 7.23E-01 | -0.09 | 6.73E-01 |
| DCD            | -0.21 | 2.80E-01 | -0.09 | 6.73E-01 |
| DGCR12         | -0.22 | 2.50E-01 | -0.09 | 6.73E-01 |
| GAPDHP32       | 0.15  | 4.47E-01 | -0.09 | 6.73E-01 |
| GEN1           | 0.26  | 1.79E-01 | -0.09 | 6.73E-01 |

|               |       |          |       |          |
|---------------|-------|----------|-------|----------|
| HMGB2         | 0.04  | 8.41E-01 | 0.09  | 6.73E-01 |
| KDEL2         | -0.07 | 7.15E-01 | -0.09 | 6.73E-01 |
| LAMTOR1       | 0.11  | 5.77E-01 | 0.09  | 6.73E-01 |
| LILRB5        | -0.10 | 5.97E-01 | 0.09  | 6.73E-01 |
| MARVELD2      | 0.23  | 2.50E-01 | 0.09  | 6.73E-01 |
| MCEMP1        | -0.10 | 6.01E-01 | 0.09  | 6.73E-01 |
| MIR4477B      | 0.24  | 2.18E-01 | -0.09 | 6.73E-01 |
| MYH11         | 0.00  | 9.99E-01 | 0.09  | 6.73E-01 |
| PCNA          | 0.06  | 7.73E-01 | -0.09 | 6.73E-01 |
| PHBP12        | 0.04  | 8.44E-01 | 0.09  | 6.73E-01 |
| PHOSPHO1      | 0.14  | 4.72E-01 | 0.09  | 6.73E-01 |
| RNU6-1190P    | 0.04  | 8.27E-01 | -0.09 | 6.73E-01 |
| RP11-107E5.3  | -0.30 | 1.25E-01 | -0.09 | 6.73E-01 |
| RP11-259O2.2  | 0.10  | 6.07E-01 | -0.09 | 6.73E-01 |
| RP11-274H2.2  | 0.35  | 6.46E-02 | -0.09 | 6.73E-01 |
| RP11-342M1.7  | 0.12  | 5.31E-01 | -0.09 | 6.73E-01 |
| RP11-43P8.2   | 0.06  | 7.64E-01 | -0.09 | 6.73E-01 |
| RP11-504G3.4  | 0.22  | 2.68E-01 | 0.09  | 6.73E-01 |
| RP13-488H8.1  | 0.03  | 8.79E-01 | 0.09  | 6.73E-01 |
| RPL7AP31      | 0.00  | 9.80E-01 | 0.09  | 6.73E-01 |
| SLC52A2       | 0.22  | 2.70E-01 | 0.09  | 6.73E-01 |
| SRBD1         | -0.13 | 5.25E-01 | 0.09  | 6.73E-01 |
| TFAP4         | 0.23  | 2.49E-01 | 0.09  | 6.73E-01 |
| ZNF41         | 0.10  | 6.18E-01 | -0.09 | 6.73E-01 |
| C1QTNF6       | -0.08 | 6.96E-01 | 0.08  | 6.74E-01 |
| COPA          | 0.15  | 4.39E-01 | 0.08  | 6.74E-01 |
| CYP2F2P       | -0.29 | 1.32E-01 | 0.08  | 6.74E-01 |
| DGUOK-AS1     | -0.11 | 5.62E-01 | 0.08  | 6.74E-01 |
| LRRC37B       | 0.08  | 6.96E-01 | 0.08  | 6.74E-01 |
| MRC2          | 0.02  | 9.38E-01 | 0.08  | 6.74E-01 |
| NUDCD3        | 0.09  | 6.38E-01 | 0.08  | 6.74E-01 |
| OPTN          | 0.03  | 8.66E-01 | 0.08  | 6.74E-01 |
| RN7SL505P     | 0.13  | 5.15E-01 | 0.08  | 6.74E-01 |
| RNU6-859P     | -0.06 | 7.43E-01 | 0.08  | 6.74E-01 |
| RP1-149A16.16 | -0.11 | 5.76E-01 | 0.08  | 6.74E-01 |
| SAFB2         | 0.20  | 3.14E-01 | 0.08  | 6.74E-01 |
| SERBP1P5      | -0.25 | 1.97E-01 | 0.08  | 6.74E-01 |
| SLC35G2       | 0.27  | 1.68E-01 | 0.08  | 6.74E-01 |
| UBXN1         | -0.07 | 7.05E-01 | 0.08  | 6.74E-01 |
| AC132872.2    | 0.16  | 4.17E-01 | -0.08 | 6.74E-01 |
| AP000473.6    | -0.29 | 1.34E-01 | -0.08 | 6.74E-01 |
| BMP5          | -0.31 | 1.07E-01 | -0.08 | 6.74E-01 |
| CCR6          | 0.06  | 7.51E-01 | -0.08 | 6.74E-01 |
| CLEC3B        | -0.25 | 2.08E-01 | -0.08 | 6.74E-01 |
| CTA-286B10.7  | 0.03  | 8.64E-01 | -0.08 | 6.74E-01 |
| DTD1          | 0.17  | 3.82E-01 | -0.08 | 6.74E-01 |
| FBXO34        | 0.17  | 3.94E-01 | -0.08 | 6.74E-01 |

|                  |       |          |       |          |
|------------------|-------|----------|-------|----------|
| HACE1            | -0.03 | 8.66E-01 | -0.08 | 6.74E-01 |
| HBS1L            | 0.08  | 6.75E-01 | -0.08 | 6.74E-01 |
| HIPK1-AS1        | 0.02  | 9.20E-01 | -0.08 | 6.74E-01 |
| MIR3605          | -0.17 | 3.87E-01 | -0.08 | 6.74E-01 |
| MTL5             | 0.42  | 2.42E-02 | -0.08 | 6.74E-01 |
| PPP4R2           | 0.27  | 1.69E-01 | -0.08 | 6.74E-01 |
| RP11-583F24.7    | 0.25  | 2.04E-01 | -0.08 | 6.74E-01 |
| SACM1L           | 0.18  | 3.55E-01 | -0.08 | 6.74E-01 |
| WASH3P           | -0.16 | 4.09E-01 | -0.08 | 6.74E-01 |
| WDR54            | 0.04  | 8.31E-01 | -0.08 | 6.74E-01 |
| XLOC_011150      | 0.19  | 3.26E-01 | -0.08 | 6.74E-01 |
| AC016644.1       | 0.10  | 6.18E-01 | 0.08  | 6.75E-01 |
| AC073283.7       | 0.08  | 6.92E-01 | -0.08 | 6.75E-01 |
| AC159540.14      | -0.03 | 8.83E-01 | 0.08  | 6.75E-01 |
| AF127577.11      | 0.10  | 6.29E-01 | -0.08 | 6.75E-01 |
| BTN2A2           | -0.18 | 3.50E-01 | 0.08  | 6.75E-01 |
| C1orf43          | 0.07  | 7.07E-01 | 0.08  | 6.75E-01 |
| C6orf106         | 0.36  | 5.86E-02 | 0.08  | 6.75E-01 |
| CTD-2012J19.3    | 0.01  | 9.58E-01 | -0.08 | 6.75E-01 |
| DAXX             | 0.14  | 4.92E-01 | 0.08  | 6.75E-01 |
| G26344           | -0.05 | 8.03E-01 | 0.08  | 6.75E-01 |
| GLB1             | -0.01 | 9.56E-01 | -0.08 | 6.75E-01 |
| HMGNA4           | -0.03 | 8.88E-01 | -0.08 | 6.75E-01 |
| KRTAP9-4         | -0.26 | 1.85E-01 | 0.08  | 6.75E-01 |
| LPAR3            | 0.12  | 5.47E-01 | 0.08  | 6.75E-01 |
| MED1             | -0.03 | 8.80E-01 | -0.08 | 6.75E-01 |
| MT-ND1           | 0.17  | 3.82E-01 | 0.08  | 6.75E-01 |
| NEK7             | 0.22  | 2.62E-01 | -0.08 | 6.75E-01 |
| PGP              | -0.03 | 8.68E-01 | 0.08  | 6.75E-01 |
| PSMD6            | 0.13  | 5.25E-01 | -0.08 | 6.75E-01 |
| RHOXF1           | -0.22 | 2.52E-01 | 0.08  | 6.75E-01 |
| RNA5SP450        | -0.20 | 3.04E-01 | 0.08  | 6.75E-01 |
| RP11-120D5.1     | 0.03  | 8.90E-01 | 0.08  | 6.75E-01 |
| RP11-20O24.4     | -0.10 | 5.96E-01 | 0.08  | 6.75E-01 |
| RP11-40C6.2      | 0.26  | 1.84E-01 | -0.08 | 6.75E-01 |
| SLC2A3P2         | 0.10  | 6.20E-01 | 0.08  | 6.75E-01 |
| SNORA54          | 0.21  | 2.87E-01 | 0.08  | 6.75E-01 |
| XLOC_013994      | 0.24  | 2.26E-01 | 0.08  | 6.75E-01 |
| KXbac-BPG32J3.15 | 0.22  | 2.61E-01 | 0.08  | 6.75E-01 |
| ZFP57            | 0.22  | 2.66E-01 | 0.08  | 6.75E-01 |
| ZNF497           | 0.16  | 4.04E-01 | 0.08  | 6.75E-01 |
| ZNF565           | 0.02  | 9.34E-01 | -0.08 | 6.75E-01 |
| snoU13           | -0.12 | 5.48E-01 | -0.08 | 6.75E-01 |
| AC022819.3       | 0.22  | 2.57E-01 | 0.08  | 6.76E-01 |
| ADRA1A           | -0.12 | 5.48E-01 | -0.08 | 6.76E-01 |
| AKAP8L           | -0.03 | 8.95E-01 | -0.08 | 6.76E-01 |
| AL357673.1       | 0.29  | 1.34E-01 | 0.08  | 6.76E-01 |

|                      |       |          |       |          |
|----------------------|-------|----------|-------|----------|
| <b>ANKRD20A4</b>     | -0.49 | 8.88E-03 | -0.08 | 6.76E-01 |
| <b>BRF1</b>          | 0.29  | 1.29E-01 | 0.08  | 6.76E-01 |
| <b>CTD-2591A1.1</b>  | 0.04  | 8.29E-01 | -0.08 | 6.76E-01 |
| <b>DDX42</b>         | -0.11 | 5.70E-01 | 0.08  | 6.76E-01 |
| <b>DLK2</b>          | 0.29  | 1.38E-01 | 0.08  | 6.76E-01 |
| <b>FASTKD5</b>       | 0.17  | 3.99E-01 | 0.08  | 6.76E-01 |
| <b>GLOD4</b>         | 0.02  | 9.29E-01 | -0.08 | 6.76E-01 |
| <b>HSD17B6</b>       | 0.16  | 4.03E-01 | 0.08  | 6.76E-01 |
| <b>IFT74</b>         | -0.22 | 2.55E-01 | 0.08  | 6.76E-01 |
| <b>KCNK7</b>         | 0.07  | 7.32E-01 | 0.08  | 6.76E-01 |
| <b>LSM12P1</b>       | -0.11 | 5.75E-01 | 0.08  | 6.76E-01 |
| <b>MIR222</b>        | 0.44  | 1.80E-02 | -0.08 | 6.76E-01 |
| <b>MIR2467</b>       | -0.12 | 5.33E-01 | 0.08  | 6.76E-01 |
| <b>MIR600HG</b>      | -0.15 | 4.45E-01 | -0.08 | 6.76E-01 |
| <b>NEDD4L</b>        | -0.07 | 7.12E-01 | 0.08  | 6.76E-01 |
| <b>OLFML3</b>        | -0.22 | 2.70E-01 | -0.08 | 6.76E-01 |
| <b>PIGK</b>          | 0.13  | 5.11E-01 | -0.08 | 6.76E-01 |
| <b>PLEKHB1</b>       | 0.05  | 8.02E-01 | -0.08 | 6.76E-01 |
| <b>PLPP1</b>         | -0.02 | 9.12E-01 | 0.08  | 6.76E-01 |
| <b>PRDM4</b>         | 0.16  | 4.29E-01 | 0.08  | 6.76E-01 |
| <b>PSME4</b>         | 0.05  | 8.19E-01 | -0.08 | 6.76E-01 |
| <b>RAB8A</b>         | 0.27  | 1.63E-01 | 0.08  | 6.76E-01 |
| <b>REEP6</b>         | 0.02  | 9.13E-01 | 0.08  | 6.76E-01 |
| <b>RP1-308E4.1</b>   | -0.21 | 2.83E-01 | 0.08  | 6.76E-01 |
| <b>RP11-109P14.8</b> | 0.07  | 7.19E-01 | 0.08  | 6.76E-01 |
| <b>RP11-320M2.1</b>  | -0.18 | 3.50E-01 | -0.08 | 6.76E-01 |
| <b>RP11-434P11.1</b> | -0.30 | 1.21E-01 | -0.08 | 6.76E-01 |
| <b>RP11-500G10.5</b> | 0.22  | 2.60E-01 | -0.08 | 6.76E-01 |
| <b>RP11-638I2.10</b> | -0.04 | 8.49E-01 | 0.08  | 6.76E-01 |
| <b>SCML2P2</b>       | 0.16  | 4.14E-01 | 0.08  | 6.76E-01 |
| <b>SLC4A1AP</b>      | 0.24  | 2.18E-01 | -0.08 | 6.76E-01 |
| <b>SNHG4</b>         | -0.07 | 7.31E-01 | -0.08 | 6.76E-01 |
| <b>SSBP3-AS1</b>     | 0.24  | 2.23E-01 | 0.08  | 6.76E-01 |
| <b>TCAF2P1</b>       | -0.11 | 5.87E-01 | -0.08 | 6.76E-01 |
| <b>TLE6</b>          | -0.22 | 2.62E-01 | -0.08 | 6.76E-01 |
| <b>XLOC_012338</b>   | -0.03 | 8.70E-01 | -0.08 | 6.76E-01 |
| <b>ZNF445</b>        | -0.10 | 6.29E-01 | -0.08 | 6.76E-01 |
| <b>ZNF680P1</b>      | -0.36 | 5.88E-02 | 0.08  | 6.76E-01 |
| <b>AC009095.4</b>    | -0.18 | 3.61E-01 | 0.08  | 6.77E-01 |
| <b>ARFGF2</b>        | 0.13  | 5.12E-01 | 0.08  | 6.77E-01 |
| <b>ATP6V1C2</b>      | 0.04  | 8.33E-01 | 0.08  | 6.77E-01 |
| <b>C17orf100</b>     | 0.04  | 8.22E-01 | -0.08 | 6.77E-01 |
| <b>C1orf115</b>      | -0.28 | 1.51E-01 | -0.08 | 6.77E-01 |
| <b>CCNI2</b>         | -0.10 | 6.01E-01 | -0.08 | 6.77E-01 |
| <b>CD109</b>         | 0.02  | 9.05E-01 | -0.08 | 6.77E-01 |
| <b>CTD-2576N18.1</b> | -0.30 | 1.23E-01 | -0.08 | 6.77E-01 |
| <b>EVA1C</b>         | 0.08  | 7.03E-01 | 0.08  | 6.77E-01 |

|                 |       |          |       |          |
|-----------------|-------|----------|-------|----------|
| FCHSD2          | -0.06 | 7.69E-01 | 0.08  | 6.77E-01 |
| FGF11           | -0.36 | 5.88E-02 | 0.08  | 6.77E-01 |
| GPR182          | 0.03  | 8.91E-01 | 0.08  | 6.77E-01 |
| GS1-279B7.2     | 0.18  | 3.57E-01 | -0.08 | 6.77E-01 |
| HIST1H2BN       | -0.07 | 7.19E-01 | 0.08  | 6.77E-01 |
| HNRNPA3P11      | -0.32 | 9.53E-02 | -0.08 | 6.77E-01 |
| HNRNPL          | 0.22  | 2.70E-01 | 0.08  | 6.77E-01 |
| HSD17B7         | 0.15  | 4.34E-01 | -0.08 | 6.77E-01 |
| HSDL1           | 0.20  | 3.09E-01 | 0.08  | 6.77E-01 |
| KB-431C1.5      | -0.03 | 8.75E-01 | -0.08 | 6.77E-01 |
| KCNK15-AS1      | -0.11 | 5.69E-01 | -0.08 | 6.77E-01 |
| KIAA1161        | 0.21  | 2.83E-01 | 0.08  | 6.77E-01 |
| KIAA2013        | 0.11  | 5.79E-01 | -0.08 | 6.77E-01 |
| KMO             | 0.33  | 8.24E-02 | -0.08 | 6.77E-01 |
| L22NC03-80A10.6 | -0.12 | 5.53E-01 | -0.08 | 6.77E-01 |
| MCTS1           | 0.09  | 6.51E-01 | 0.08  | 6.77E-01 |
| NICN1           | -0.01 | 9.67E-01 | 0.08  | 6.77E-01 |
| P2RX5           | -0.22 | 2.66E-01 | 0.08  | 6.77E-01 |
| PDSS1P1         | -0.13 | 5.17E-01 | -0.08 | 6.77E-01 |
| PLCB4           | -0.34 | 7.34E-02 | -0.08 | 6.77E-01 |
| PTRH2           | 0.13  | 5.25E-01 | 0.08  | 6.77E-01 |
| RIMKLBP2        | -0.08 | 6.76E-01 | 0.08  | 6.77E-01 |
| RNU6-195P       | -0.07 | 7.42E-01 | -0.08 | 6.77E-01 |
| RNU7-79P        | 0.06  | 7.66E-01 | -0.08 | 6.77E-01 |
| RP11-21G15.1    | -0.08 | 6.95E-01 | 0.08  | 6.77E-01 |
| RP11-344F13.1   | -0.26 | 1.77E-01 | 0.08  | 6.77E-01 |
| RP11-361I14.2   | -0.06 | 7.68E-01 | -0.08 | 6.77E-01 |
| RP11-417F21.1   | 0.09  | 6.40E-01 | -0.08 | 6.77E-01 |
| RP11-72I2.2     | -0.25 | 1.98E-01 | 0.08  | 6.77E-01 |
| RP11-93G5.1     | 0.02  | 9.27E-01 | 0.08  | 6.77E-01 |
| RP13-554M15.2   | -0.18 | 3.70E-01 | 0.08  | 6.77E-01 |
| TUSC2           | 0.05  | 8.19E-01 | -0.08 | 6.77E-01 |
| VAMP1           | -0.08 | 6.91E-01 | 0.08  | 6.77E-01 |
| C1QL1           | -0.02 | 9.05E-01 | 0.08  | 6.78E-01 |
| CCDC108         | -0.24 | 2.21E-01 | -0.08 | 6.78E-01 |
| CTC-329H14.1    | 0.05  | 8.18E-01 | -0.08 | 6.78E-01 |
| CTSO            | 0.27  | 1.58E-01 | -0.08 | 6.78E-01 |
| EIF4HP1         | 0.06  | 7.67E-01 | 0.08  | 6.78E-01 |
| FABP9           | -0.06 | 7.79E-01 | 0.08  | 6.78E-01 |
| FAM26D          | -0.12 | 5.53E-01 | -0.08 | 6.78E-01 |
| FAM86HP         | 0.23  | 2.44E-01 | -0.08 | 6.78E-01 |
| G42176          | -0.09 | 6.40E-01 | 0.08  | 6.78E-01 |
| GSTZ1           | 0.30  | 1.22E-01 | 0.08  | 6.78E-01 |
| HAS2            | -0.23 | 2.30E-01 | 0.08  | 6.78E-01 |
| HLCS            | 0.07  | 7.27E-01 | -0.08 | 6.78E-01 |
| HSD3BP4         | 0.00  | 9.91E-01 | 0.08  | 6.78E-01 |
| HSPA1A          | -0.16 | 4.19E-01 | 0.08  | 6.78E-01 |

|               |       |          |       |          |
|---------------|-------|----------|-------|----------|
| KLHL20        | 0.08  | 6.82E-01 | -0.08 | 6.78E-01 |
| MIR143HG      | -0.21 | 2.82E-01 | 0.08  | 6.78E-01 |
| MIR548L       | 0.10  | 5.95E-01 | 0.08  | 6.78E-01 |
| NBPF2P        | 0.19  | 3.23E-01 | -0.08 | 6.78E-01 |
| NUFIP1        | 0.20  | 3.02E-01 | -0.08 | 6.78E-01 |
| NUMB          | -0.33 | 8.90E-02 | 0.08  | 6.78E-01 |
| PABPC1P7      | 0.03  | 8.91E-01 | -0.08 | 6.78E-01 |
| PCDHGC5       | 0.10  | 6.11E-01 | 0.08  | 6.78E-01 |
| PLIN5         | 0.21  | 2.90E-01 | 0.08  | 6.78E-01 |
| POM121L14P    | 0.02  | 9.03E-01 | -0.08 | 6.78E-01 |
| POMGNT1       | 0.04  | 8.23E-01 | 0.08  | 6.78E-01 |
| PPP3CA        | 0.36  | 5.90E-02 | -0.08 | 6.78E-01 |
| PTPN20CP      | 0.16  | 4.07E-01 | -0.08 | 6.78E-01 |
| PTPRB         | -0.21 | 2.79E-01 | 0.08  | 6.78E-01 |
| RN7SL200P     | -0.36 | 6.05E-02 | 0.08  | 6.78E-01 |
| RP1-228P16.8  | 0.11  | 5.88E-01 | -0.08 | 6.78E-01 |
| RP11-184B22.2 | 0.08  | 6.88E-01 | -0.08 | 6.78E-01 |
| RP11-190D6.2  | 0.09  | 6.53E-01 | 0.08  | 6.78E-01 |
| RP11-437B10.1 | -0.19 | 3.26E-01 | -0.08 | 6.78E-01 |
| RP11-779O18.3 | -0.30 | 1.26E-01 | -0.08 | 6.78E-01 |
| SCN1A         | -0.02 | 9.04E-01 | -0.08 | 6.78E-01 |
| TXNDC8        | 0.02  | 9.28E-01 | 0.08  | 6.78E-01 |
| U2AF1L4       | 0.14  | 4.73E-01 | 0.08  | 6.78E-01 |
| UCN2          | 0.19  | 3.35E-01 | 0.08  | 6.78E-01 |
| WARS2         | -0.12 | 5.53E-01 | -0.08 | 6.78E-01 |
| XLOC_005542   | -0.05 | 7.89E-01 | 0.08  | 6.78E-01 |
| XLOC_011383   | -0.19 | 3.39E-01 | -0.08 | 6.78E-01 |
| ABCB9         | 0.26  | 1.79E-01 | 0.08  | 6.79E-01 |
| AC004019.13   | 0.12  | 5.36E-01 | 0.08  | 6.79E-01 |
| AF131216.6    | -0.13 | 5.05E-01 | -0.08 | 6.79E-01 |
| ATG5          | 0.21  | 2.92E-01 | 0.08  | 6.79E-01 |
| CASC21        | 0.23  | 2.42E-01 | -0.08 | 6.79E-01 |
| CCDC146       | -0.08 | 6.92E-01 | -0.08 | 6.79E-01 |
| CKAP5         | -0.02 | 9.23E-01 | 0.08  | 6.79E-01 |
| COL22A1       | 0.08  | 6.75E-01 | 0.08  | 6.79E-01 |
| CPT1A         | 0.10  | 6.12E-01 | -0.08 | 6.79E-01 |
| CTA-299D3.8   | -0.18 | 3.52E-01 | 0.08  | 6.79E-01 |
| CTA-339C12.1  | -0.05 | 7.94E-01 | -0.08 | 6.79E-01 |
| CTD-2523D13.1 | 0.31  | 1.08E-01 | -0.08 | 6.79E-01 |
| CXorf36       | -0.27 | 1.59E-01 | -0.08 | 6.79E-01 |
| DDX10P1       | -0.16 | 4.06E-01 | -0.08 | 6.79E-01 |
| DICER1        | 0.18  | 3.50E-01 | -0.08 | 6.79E-01 |
| EXT2          | 0.23  | 2.36E-01 | -0.08 | 6.79E-01 |
| FGF12         | -0.34 | 7.79E-02 | 0.08  | 6.79E-01 |
| G33524        | -0.31 | 1.06E-01 | 0.08  | 6.79E-01 |
| GRIN1         | 0.36  | 6.03E-02 | 0.08  | 6.79E-01 |
| GS1-5L10.1    | -0.02 | 9.15E-01 | -0.08 | 6.79E-01 |

|               |       |          |       |          |
|---------------|-------|----------|-------|----------|
| HYAL4         | 0.26  | 1.87E-01 | 0.08  | 6.79E-01 |
| NTM           | -0.05 | 7.91E-01 | -0.08 | 6.79E-01 |
| PCDHA9        | -0.47 | 1.19E-02 | -0.08 | 6.79E-01 |
| PDIA5         | 0.15  | 4.39E-01 | 0.08  | 6.79E-01 |
| PWP1          | 0.12  | 5.40E-01 | -0.08 | 6.79E-01 |
| RN7SL68P      | -0.18 | 3.69E-01 | 0.08  | 6.79E-01 |
| RNF152P1      | -0.13 | 5.02E-01 | 0.08  | 6.79E-01 |
| RP1-93H18.1   | 0.02  | 9.04E-01 | -0.08 | 6.79E-01 |
| RP11-15A1.8   | -0.25 | 1.99E-01 | -0.08 | 6.79E-01 |
| RP11-465N4.4  | -0.20 | 2.99E-01 | 0.08  | 6.79E-01 |
| RP11-556H2.1  | 0.01  | 9.48E-01 | -0.08 | 6.79E-01 |
| RPS4XP11      | 0.23  | 2.46E-01 | -0.08 | 6.79E-01 |
| SLC25A48      | -0.27 | 1.67E-01 | -0.08 | 6.79E-01 |
| SNHG17        | 0.18  | 3.56E-01 | 0.08  | 6.79E-01 |
| SURF6         | 0.24  | 2.21E-01 | 0.08  | 6.79E-01 |
| SYNE3         | -0.24 | 2.17E-01 | -0.08 | 6.79E-01 |
| SYTL1         | 0.11  | 5.91E-01 | 0.08  | 6.79E-01 |
| XLOC_014268   | -0.08 | 6.79E-01 | -0.08 | 6.79E-01 |
| YWHAG         | 0.08  | 6.92E-01 | -0.08 | 6.79E-01 |
| ZNF638-IT1    | -0.23 | 2.47E-01 | -0.08 | 6.79E-01 |
| CCNDBP1       | -0.13 | 5.04E-01 | 0.08  | 6.80E-01 |
| CDK7          | -0.11 | 5.93E-01 | 0.08  | 6.80E-01 |
| FAM118B       | 0.07  | 7.10E-01 | 0.08  | 6.80E-01 |
| GPRIN3        | 0.29  | 1.35E-01 | 0.08  | 6.80E-01 |
| INTS12        | -0.07 | 7.31E-01 | 0.08  | 6.80E-01 |
| LINC00556     | 0.21  | 2.87E-01 | 0.08  | 6.80E-01 |
| NFYC          | 0.12  | 5.34E-01 | 0.08  | 6.80E-01 |
| NRBP1         | 0.08  | 6.96E-01 | 0.08  | 6.80E-01 |
| RP1-45C12.1   | -0.06 | 7.62E-01 | 0.08  | 6.80E-01 |
| RP11-715J22.6 | -0.28 | 1.54E-01 | 0.08  | 6.80E-01 |
| S1PR4         | 0.18  | 3.48E-01 | 0.08  | 6.80E-01 |
| SMKR1         | 0.13  | 5.07E-01 | 0.08  | 6.80E-01 |
| UQCRC1        | -0.04 | 8.33E-01 | 0.08  | 6.80E-01 |
| AC013472.3    | -0.25 | 1.94E-01 | -0.08 | 6.80E-01 |
| ACTL6A        | 0.06  | 7.69E-01 | -0.08 | 6.80E-01 |
| BCAS4         | 0.01  | 9.59E-01 | -0.08 | 6.80E-01 |
| FAM155A       | -0.03 | 8.86E-01 | -0.08 | 6.80E-01 |
| G35484        | 0.18  | 3.59E-01 | -0.08 | 6.80E-01 |
| KDELC2        | 0.28  | 1.53E-01 | -0.08 | 6.80E-01 |
| LEAP2         | 0.10  | 6.31E-01 | -0.08 | 6.80E-01 |
| MTA2          | 0.17  | 3.79E-01 | -0.08 | 6.80E-01 |
| NAA50         | 0.11  | 5.85E-01 | -0.08 | 6.80E-01 |
| QSOX2         | -0.03 | 8.75E-01 | -0.08 | 6.80E-01 |
| RP11-15I11.3  | 0.17  | 3.81E-01 | -0.08 | 6.80E-01 |
| RP11-191L17.1 | -0.06 | 7.55E-01 | -0.08 | 6.80E-01 |
| RP11-288H12.3 | 0.01  | 9.44E-01 | -0.08 | 6.80E-01 |
| RP11-323F24.3 | -0.29 | 1.33E-01 | -0.08 | 6.80E-01 |

|                      |       |          |       |          |
|----------------------|-------|----------|-------|----------|
| <b>RP3-402G11.28</b> | 0.05  | 7.93E-01 | -0.08 | 6.80E-01 |
| <b>SSFA2</b>         | -0.07 | 7.07E-01 | -0.08 | 6.80E-01 |
| <b>ZNF169</b>        | -0.27 | 1.67E-01 | -0.08 | 6.80E-01 |
| <b>ZNF189</b>        | 0.17  | 3.89E-01 | -0.08 | 6.80E-01 |
| <b>AC004895.4</b>    | -0.02 | 9.01E-01 | -0.08 | 6.81E-01 |
| <b>AC006116.12</b>   | 0.12  | 5.46E-01 | 0.08  | 6.81E-01 |
| <b>AK1</b>           | 0.14  | 4.81E-01 | 0.08  | 6.81E-01 |
| <b>BMPR2</b>         | 0.12  | 5.36E-01 | 0.08  | 6.81E-01 |
| <b>C16orf46</b>      | -0.43 | 2.40E-02 | -0.08 | 6.81E-01 |
| <b>C9orf129</b>      | -0.19 | 3.39E-01 | 0.08  | 6.81E-01 |
| <b>CTB-4116.1</b>    | -0.19 | 3.30E-01 | 0.08  | 6.81E-01 |
| <b>DOCK8</b>         | 0.23  | 2.43E-01 | 0.08  | 6.81E-01 |
| <b>DPRXP5</b>        | 0.19  | 3.25E-01 | -0.08 | 6.81E-01 |
| <b>ECHS1</b>         | 0.20  | 3.02E-01 | 0.08  | 6.81E-01 |
| <b>G36939</b>        | -0.25 | 1.99E-01 | -0.08 | 6.81E-01 |
| <b>GNB4</b>          | -0.12 | 5.56E-01 | -0.08 | 6.81E-01 |
| <b>IGLC3</b>         | 0.39  | 4.09E-02 | 0.08  | 6.81E-01 |
| <b>KRTAP2-2</b>      | -0.17 | 3.79E-01 | 0.08  | 6.81E-01 |
| <b>LIPG</b>          | 0.38  | 4.89E-02 | -0.08 | 6.81E-01 |
| <b>MARS</b>          | 0.03  | 8.91E-01 | 0.08  | 6.81E-01 |
| <b>MIDN</b>          | 0.08  | 6.68E-01 | 0.08  | 6.81E-01 |
| <b>MIR320E</b>       | -0.11 | 5.71E-01 | -0.08 | 6.81E-01 |
| <b>MIR503HG</b>      | -0.12 | 5.47E-01 | 0.08  | 6.81E-01 |
| <b>NEDD8</b>         | 0.01  | 9.54E-01 | 0.08  | 6.81E-01 |
| <b>PIN1</b>          | -0.20 | 3.09E-01 | 0.08  | 6.81E-01 |
| <b>PLXDC1</b>        | -0.02 | 9.10E-01 | 0.08  | 6.81E-01 |
| <b>RFC5</b>          | 0.16  | 4.04E-01 | -0.08 | 6.81E-01 |
| <b>RFT1</b>          | -0.05 | 8.08E-01 | 0.08  | 6.81E-01 |
| <b>RNF44</b>         | 0.02  | 9.00E-01 | 0.08  | 6.81E-01 |
| <b>RP11-351M8.1</b>  | -0.23 | 2.34E-01 | 0.08  | 6.81E-01 |
| <b>RP11-3K16.2</b>   | 0.06  | 7.61E-01 | -0.08 | 6.81E-01 |
| <b>RP11-637C24.5</b> | -0.11 | 5.92E-01 | -0.08 | 6.81E-01 |
| <b>RP11-84C13.2</b>  | 0.13  | 5.14E-01 | 0.08  | 6.81E-01 |
| <b>RP4-620E11.8</b>  | -0.14 | 4.81E-01 | -0.08 | 6.81E-01 |
| <b>RPS3AP12</b>      | -0.12 | 5.28E-01 | -0.08 | 6.81E-01 |
| <b>SLC38A4</b>       | 0.08  | 6.88E-01 | 0.08  | 6.81E-01 |
| <b>TCF7</b>          | 0.12  | 5.41E-01 | 0.08  | 6.81E-01 |
| <b>UPP2</b>          | -0.04 | 8.33E-01 | -0.08 | 6.81E-01 |
| <b>AC007405.4</b>    | -0.01 | 9.68E-01 | 0.08  | 6.83E-01 |
| <b>CH17-140K24.6</b> | -0.05 | 8.08E-01 | -0.08 | 6.83E-01 |
| <b>COL23A1</b>       | -0.08 | 6.77E-01 | 0.08  | 6.83E-01 |
| <b>CTD-2135J3.3</b>  | 0.25  | 1.95E-01 | 0.08  | 6.83E-01 |
| <b>EEFSEC</b>        | -0.20 | 2.98E-01 | 0.08  | 6.83E-01 |
| <b>ERVFRD-3</b>      | -0.43 | 2.28E-02 | 0.08  | 6.83E-01 |
| <b>FAM117A</b>       | 0.02  | 9.02E-01 | -0.08 | 6.83E-01 |
| <b>FKBP2</b>         | 0.06  | 7.66E-01 | 0.08  | 6.83E-01 |
| <b>FSTL5</b>         | 0.17  | 3.98E-01 | -0.08 | 6.83E-01 |



|                |       |          |       |          |
|----------------|-------|----------|-------|----------|
| G11405         | -0.28 | 1.56E-01 | 0.08  | 6.83E-01 |
| G32232         | 0.01  | 9.69E-01 | 0.08  | 6.83E-01 |
| G7242          | 0.13  | 5.25E-01 | 0.08  | 6.83E-01 |
| MRPL1          | 0.14  | 4.77E-01 | -0.08 | 6.83E-01 |
| MTND1P36       | -0.18 | 3.52E-01 | 0.08  | 6.83E-01 |
| NCK1-AS1       | 0.09  | 6.56E-01 | 0.08  | 6.83E-01 |
| NDUFV3         | 0.14  | 4.78E-01 | 0.08  | 6.83E-01 |
| NOS1           | -0.30 | 1.25E-01 | -0.08 | 6.83E-01 |
| ORAI1          | 0.01  | 9.58E-01 | 0.08  | 6.83E-01 |
| PDE5A          | -0.18 | 3.52E-01 | -0.08 | 6.83E-01 |
| PIAS2          | 0.11  | 5.81E-01 | -0.08 | 6.83E-01 |
| PLXNB3         | 0.14  | 4.92E-01 | 0.08  | 6.83E-01 |
| PPP1R10        | 0.28  | 1.46E-01 | 0.08  | 6.83E-01 |
| RANGRF         | 0.17  | 3.96E-01 | 0.08  | 6.83E-01 |
| RN7SL449P      | -0.31 | 1.08E-01 | 0.08  | 6.83E-01 |
| RP11-1105O14.1 | 0.12  | 5.41E-01 | -0.08 | 6.83E-01 |
| RP11-153F10.2  | -0.24 | 2.14E-01 | -0.08 | 6.83E-01 |
| RP11-314N13.10 | -0.19 | 3.41E-01 | 0.08  | 6.83E-01 |
| RP11-319E16.1  | 0.15  | 4.51E-01 | 0.08  | 6.83E-01 |
| RP3-395M20.2   | -0.09 | 6.67E-01 | -0.08 | 6.83E-01 |
| RPS23P1        | 0.20  | 2.99E-01 | 0.08  | 6.83E-01 |
| RUNDC3A        | -0.28 | 1.49E-01 | 0.08  | 6.83E-01 |
| SF3A3          | 0.18  | 3.60E-01 | 0.08  | 6.83E-01 |
| SKA3           | 0.03  | 8.80E-01 | 0.08  | 6.83E-01 |
| SUCLA2P1       | -0.14 | 4.63E-01 | -0.08 | 6.83E-01 |
| TTI2           | -0.01 | 9.57E-01 | 0.08  | 6.83E-01 |
| WDR86-AS1      | 0.17  | 3.76E-01 | 0.08  | 6.83E-01 |
| AC007364.1     | -0.22 | 2.57E-01 | -0.08 | 6.84E-01 |
| ACOT7          | 0.30  | 1.23E-01 | -0.08 | 6.84E-01 |
| CCDC180        | 0.07  | 7.09E-01 | -0.08 | 6.84E-01 |
| CDC40          | 0.03  | 8.64E-01 | -0.08 | 6.84E-01 |
| CTC-367J11.1   | -0.05 | 7.82E-01 | -0.08 | 6.84E-01 |
| FAM43B         | -0.20 | 3.18E-01 | -0.08 | 6.84E-01 |
| FAM63A         | 0.03  | 8.93E-01 | -0.08 | 6.84E-01 |
| HMGXB4         | -0.18 | 3.64E-01 | -0.08 | 6.84E-01 |
| LHFPL4         | 0.10  | 6.07E-01 | -0.08 | 6.84E-01 |
| RBMS3-AS2      | -0.51 | 5.50E-03 | -0.08 | 6.84E-01 |
| RP11-1334A24.6 | 0.06  | 7.65E-01 | -0.08 | 6.84E-01 |
| RP11-337N6.3   | 0.18  | 3.69E-01 | -0.08 | 6.84E-01 |
| RP11-57C19.6   | 0.18  | 3.60E-01 | -0.08 | 6.84E-01 |
| RP5-1142A6.2   | -0.13 | 4.93E-01 | -0.08 | 6.84E-01 |
| RP5-943J3.2    | 0.18  | 3.71E-01 | -0.08 | 6.84E-01 |
| RPL15          | 0.09  | 6.47E-01 | -0.08 | 6.84E-01 |
| SEC31A         | -0.15 | 4.40E-01 | -0.08 | 6.84E-01 |
| SNRPB          | 0.02  | 9.26E-01 | -0.08 | 6.84E-01 |
| SRGAP2-AS1     | -0.34 | 8.08E-02 | -0.08 | 6.84E-01 |
| TMEM198        | 0.12  | 5.41E-01 | -0.08 | 6.84E-01 |

|                      |       |          |       |          |
|----------------------|-------|----------|-------|----------|
| <b>XLOC_002882</b>   | -0.20 | 2.96E-01 | -0.08 | 6.84E-01 |
| <b>ZNF275</b>        | 0.02  | 9.01E-01 | -0.08 | 6.84E-01 |
| <b>AL022393.9</b>    | -0.10 | 6.31E-01 | 0.08  | 6.84E-01 |
| <b>ATIC</b>          | 0.04  | 8.25E-01 | 0.08  | 6.84E-01 |
| <b>CEP63</b>         | 0.00  | 9.83E-01 | 0.08  | 6.84E-01 |
| <b>G40185</b>        | 0.02  | 9.28E-01 | 0.08  | 6.84E-01 |
| <b>ITGB2-AS1</b>     | 0.42  | 2.43E-02 | 0.08  | 6.84E-01 |
| <b>MRPL22</b>        | -0.05 | 8.15E-01 | 0.08  | 6.84E-01 |
| <b>RAB1A</b>         | 0.18  | 3.57E-01 | 0.08  | 6.84E-01 |
| <b>RNU6-795P</b>     | 0.14  | 4.72E-01 | 0.08  | 6.84E-01 |
| <b>RP11-76114.5</b>  | -0.41 | 3.06E-02 | 0.08  | 6.84E-01 |
| <b>RP11-782C8.3</b>  | -0.36 | 5.84E-02 | 0.08  | 6.84E-01 |
| <b>RP11-92K2.2</b>   | 0.20  | 3.07E-01 | 0.08  | 6.84E-01 |
| <b>RP13-143G15.4</b> | 0.06  | 7.48E-01 | 0.08  | 6.84E-01 |
| <b>SETD1B</b>        | -0.21 | 2.84E-01 | 0.08  | 6.84E-01 |
| <b>TBC1D8</b>        | 0.20  | 3.01E-01 | 0.08  | 6.84E-01 |
| <b>ANKRD34C</b>      | -0.12 | 5.36E-01 | -0.08 | 6.85E-01 |
| <b>BDNF-AS</b>       | -0.18 | 3.63E-01 | -0.08 | 6.85E-01 |
| <b>CCDC122</b>       | -0.26 | 1.76E-01 | -0.08 | 6.85E-01 |
| <b>CCDC89</b>        | -0.07 | 7.21E-01 | -0.08 | 6.85E-01 |
| <b>CYP2D8P</b>       | 0.00  | 9.88E-01 | -0.08 | 6.85E-01 |
| <b>DNM1L</b>         | 0.12  | 5.55E-01 | -0.08 | 6.85E-01 |
| <b>MIR27B</b>        | -0.04 | 8.35E-01 | -0.08 | 6.85E-01 |
| <b>OR2A1</b>         | -0.20 | 2.96E-01 | -0.08 | 6.85E-01 |
| <b>PRKG1-AS1</b>     | 0.09  | 6.38E-01 | -0.08 | 6.85E-01 |
| <b>PUM2</b>          | -0.31 | 1.08E-01 | -0.08 | 6.85E-01 |
| <b>RN7SL733P</b>     | 0.07  | 7.21E-01 | -0.08 | 6.85E-01 |
| <b>RP11-184M15.1</b> | 0.38  | 4.41E-02 | -0.08 | 6.85E-01 |
| <b>RP11-218C14.5</b> | -0.18 | 3.69E-01 | -0.08 | 6.85E-01 |
| <b>RP11-384O8.1</b>  | 0.01  | 9.65E-01 | -0.08 | 6.85E-01 |
| <b>RP3-335E1.1</b>   | 0.09  | 6.49E-01 | -0.08 | 6.85E-01 |
| <b>SRD5A3-AS1</b>    | -0.07 | 7.15E-01 | -0.08 | 6.85E-01 |
| <b>UFSP1</b>         | 0.02  | 9.00E-01 | -0.08 | 6.85E-01 |
| <b>DES</b>           | 0.15  | 4.36E-01 | 0.08  | 6.85E-01 |
| <b>GS1-124K5.9</b>   | 0.09  | 6.35E-01 | 0.08  | 6.85E-01 |
| <b>PDCL3P5</b>       | -0.25 | 1.98E-01 | 0.08  | 6.85E-01 |
| <b>RP11-414J4.2</b>  | 0.07  | 7.27E-01 | 0.08  | 6.85E-01 |
| <b>RP11-839D17.3</b> | -0.23 | 2.29E-01 | 0.08  | 6.85E-01 |
| <b>TBP</b>           | 0.08  | 6.72E-01 | 0.08  | 6.85E-01 |
| <b>ZBTB46</b>        | -0.42 | 2.72E-02 | 0.08  | 6.85E-01 |
| <b>ADORA2A</b>       | 0.11  | 5.71E-01 | 0.08  | 6.86E-01 |
| <b>ADPRHL2</b>       | 0.26  | 1.84E-01 | 0.08  | 6.86E-01 |
| <b>BMS1P5</b>        | -0.04 | 8.42E-01 | 0.08  | 6.86E-01 |
| <b>CALML4</b>        | 0.35  | 7.10E-02 | 0.08  | 6.86E-01 |
| <b>CEP164</b>        | 0.18  | 3.65E-01 | 0.08  | 6.86E-01 |
| <b>CTD-2650P22.2</b> | 0.10  | 6.25E-01 | 0.08  | 6.86E-01 |
| <b>EMID1</b>         | 0.00  | 9.80E-01 | 0.08  | 6.86E-01 |

|               |       |          |       |          |
|---------------|-------|----------|-------|----------|
| ENPP7P2       | -0.06 | 7.64E-01 | 0.08  | 6.86E-01 |
| IMPACT        | 0.14  | 4.72E-01 | 0.08  | 6.86E-01 |
| LRP8          | 0.20  | 3.20E-01 | 0.08  | 6.86E-01 |
| MIR205HG      | 0.17  | 3.91E-01 | 0.08  | 6.86E-01 |
| MMP25-AS1     | -0.10 | 6.19E-01 | 0.08  | 6.86E-01 |
| MYO5A         | 0.03  | 8.68E-01 | 0.08  | 6.86E-01 |
| NRK           | -0.27 | 1.57E-01 | 0.08  | 6.86E-01 |
| PRELID1P3     | -0.10 | 6.28E-01 | 0.08  | 6.86E-01 |
| RAB37         | 0.36  | 6.24E-02 | 0.08  | 6.86E-01 |
| RP11-104N10.1 | -0.06 | 7.46E-01 | 0.08  | 6.86E-01 |
| RP11-314A20.2 | 0.14  | 4.66E-01 | 0.08  | 6.86E-01 |
| RP11-329A14.1 | -0.16 | 4.18E-01 | 0.08  | 6.86E-01 |
| ZNF182        | -0.22 | 2.59E-01 | 0.08  | 6.86E-01 |
| ACO1          | 0.02  | 9.10E-01 | -0.08 | 6.86E-01 |
| AP1S3         | 0.16  | 4.07E-01 | -0.08 | 6.86E-01 |
| COPS3         | 0.00  | 9.99E-01 | -0.08 | 6.86E-01 |
| EEF1GP2       | 0.02  | 9.10E-01 | -0.08 | 6.86E-01 |
| ENTPD8        | 0.09  | 6.38E-01 | -0.08 | 6.86E-01 |
| FAM3D         | 0.38  | 4.51E-02 | -0.08 | 6.86E-01 |
| FAM53B-AS1    | 0.04  | 8.35E-01 | -0.08 | 6.86E-01 |
| LYVE1         | -0.10 | 6.01E-01 | -0.08 | 6.86E-01 |
| MIR2117HG     | 0.11  | 5.81E-01 | -0.08 | 6.86E-01 |
| MORN4         | 0.12  | 5.47E-01 | -0.08 | 6.86E-01 |
| OLA1          | 0.00  | 9.92E-01 | -0.08 | 6.86E-01 |
| PSMC1P9       | -0.37 | 5.12E-02 | -0.08 | 6.86E-01 |
| RGPD8         | -0.43 | 2.26E-02 | -0.08 | 6.86E-01 |
| RN7SKP64      | -0.04 | 8.39E-01 | -0.08 | 6.86E-01 |
| RNF2          | 0.11  | 5.71E-01 | -0.08 | 6.86E-01 |
| RP11-338L22.2 | 0.03  | 8.90E-01 | -0.08 | 6.86E-01 |
| RP11-386G11.5 | -0.31 | 1.03E-01 | -0.08 | 6.86E-01 |
| RP11-427L15.2 | -0.10 | 6.00E-01 | -0.08 | 6.86E-01 |
| RP11-47J17.2  | -0.28 | 1.55E-01 | -0.08 | 6.86E-01 |
| RP11-77K12.3  | -0.02 | 9.16E-01 | -0.08 | 6.86E-01 |
| RP11-77K12.5  | -0.12 | 5.44E-01 | -0.08 | 6.86E-01 |
| SRD5A1        | 0.25  | 2.04E-01 | -0.08 | 6.86E-01 |
| TBC1D3F       | -0.02 | 9.15E-01 | -0.08 | 6.86E-01 |
| TMEM200B      | -0.36 | 5.88E-02 | -0.08 | 6.86E-01 |
| ABL2          | -0.10 | 6.29E-01 | 0.08  | 6.87E-01 |
| AC087294.2    | 0.26  | 1.81E-01 | 0.08  | 6.87E-01 |
| AKAP10        | 0.32  | 9.90E-02 | 0.08  | 6.87E-01 |
| CALB2         | 0.11  | 5.87E-01 | 0.08  | 6.87E-01 |
| CCDC81        | 0.14  | 4.72E-01 | 0.08  | 6.87E-01 |
| CTA-363E6.6   | -0.07 | 7.28E-01 | 0.08  | 6.87E-01 |
| FIBP          | 0.01  | 9.79E-01 | 0.08  | 6.87E-01 |
| G1033         | 0.33  | 8.51E-02 | 0.08  | 6.87E-01 |
| G43078        | 0.02  | 9.22E-01 | 0.08  | 6.87E-01 |
| KAZN          | 0.24  | 2.14E-01 | 0.08  | 6.87E-01 |

|                |       |          |       |          |
|----------------|-------|----------|-------|----------|
| LYPLA1         | 0.16  | 4.03E-01 | 0.08  | 6.87E-01 |
| OGFR-AS1       | -0.10 | 6.15E-01 | 0.08  | 6.87E-01 |
| RHPN1          | -0.27 | 1.65E-01 | 0.08  | 6.87E-01 |
| RNY1P7         | -0.11 | 5.77E-01 | 0.08  | 6.87E-01 |
| RP11-447D11.3  | 0.34  | 7.34E-02 | 0.08  | 6.87E-01 |
| RPS6KL1        | 0.14  | 4.68E-01 | 0.08  | 6.87E-01 |
| STK39          | 0.00  | 9.89E-01 | 0.08  | 6.87E-01 |
| TIMM22         | 0.10  | 6.23E-01 | 0.08  | 6.87E-01 |
| VTRNA1-1       | 0.30  | 1.24E-01 | 0.08  | 6.87E-01 |
| ANAPC5         | -0.07 | 7.30E-01 | -0.08 | 6.87E-01 |
| ARMC1          | 0.02  | 9.13E-01 | -0.08 | 6.87E-01 |
| ARSG           | -0.16 | 4.06E-01 | -0.08 | 6.87E-01 |
| CD160          | 0.26  | 1.79E-01 | -0.08 | 6.87E-01 |
| CDKN2AIPNL     | 0.26  | 1.81E-01 | -0.08 | 6.87E-01 |
| GSDMB          | -0.33 | 8.45E-02 | -0.08 | 6.87E-01 |
| GTF2A1         | -0.01 | 9.59E-01 | -0.08 | 6.87E-01 |
| IGF2BP2-AS1    | -0.15 | 4.35E-01 | -0.08 | 6.87E-01 |
| LRFN1          | 0.03  | 8.68E-01 | -0.08 | 6.87E-01 |
| MGLL           | 0.18  | 3.71E-01 | -0.08 | 6.87E-01 |
| MRPL54         | 0.11  | 5.73E-01 | -0.08 | 6.87E-01 |
| PES1           | 0.00  | 9.82E-01 | -0.08 | 6.87E-01 |
| RASGEF1A       | -0.20 | 3.20E-01 | -0.08 | 6.87E-01 |
| RP11-1038A11.3 | 0.01  | 9.70E-01 | -0.08 | 6.87E-01 |
| RP11-244O19.1  | -0.22 | 2.71E-01 | -0.08 | 6.87E-01 |
| RP11-38L15.8   | -0.13 | 5.10E-01 | -0.08 | 6.87E-01 |
| RP11-872D17.8  | -0.11 | 5.81E-01 | -0.08 | 6.87E-01 |
| RP5-1041C10.3  | -0.08 | 6.97E-01 | -0.08 | 6.87E-01 |
| SLC9A8         | 0.14  | 4.87E-01 | -0.08 | 6.87E-01 |
| TIMM23         | 0.12  | 5.29E-01 | -0.08 | 6.87E-01 |
| TTC21B         | -0.14 | 4.69E-01 | -0.08 | 6.87E-01 |
| ZC3H13         | -0.19 | 3.25E-01 | -0.08 | 6.87E-01 |
| AC004012.1     | -0.03 | 8.99E-01 | -0.08 | 6.88E-01 |
| AC005795.1     | 0.01  | 9.42E-01 | -0.08 | 6.88E-01 |
| AC006538.1     | -0.09 | 6.45E-01 | -0.08 | 6.88E-01 |
| AC011933.2     | 0.03  | 8.63E-01 | -0.08 | 6.88E-01 |
| APBB1          | -0.08 | 6.92E-01 | -0.08 | 6.88E-01 |
| APLNR          | -0.14 | 4.79E-01 | 0.08  | 6.88E-01 |
| BAD            | 0.03  | 8.65E-01 | 0.08  | 6.88E-01 |
| BCAR1          | 0.03  | 8.94E-01 | 0.08  | 6.88E-01 |
| C20orf194      | 0.23  | 2.31E-01 | 0.08  | 6.88E-01 |
| CBR3           | 0.01  | 9.46E-01 | 0.08  | 6.88E-01 |
| CMBL           | -0.03 | 8.68E-01 | -0.08 | 6.88E-01 |
| CTBP2P8        | -0.19 | 3.45E-01 | -0.08 | 6.88E-01 |
| DHCR24         | -0.01 | 9.61E-01 | -0.08 | 6.88E-01 |
| DIP2C          | -0.36 | 5.76E-02 | -0.08 | 6.88E-01 |
| FAM133A        | -0.21 | 2.88E-01 | 0.08  | 6.88E-01 |
| FANCB          | 0.01  | 9.72E-01 | -0.08 | 6.88E-01 |

|               |       |          |       |          |
|---------------|-------|----------|-------|----------|
| FRAT2         | 0.13  | 5.04E-01 | 0.08  | 6.88E-01 |
| FSTL4         | -0.05 | 7.91E-01 | -0.08 | 6.88E-01 |
| GABRA4        | 0.20  | 3.04E-01 | 0.08  | 6.88E-01 |
| GCSHP4        | -0.23 | 2.33E-01 | 0.08  | 6.88E-01 |
| GPRIN2        | -0.13 | 5.03E-01 | -0.08 | 6.88E-01 |
| KRT20         | -0.07 | 7.27E-01 | -0.08 | 6.88E-01 |
| KRTAP5-7      | 0.02  | 9.25E-01 | -0.08 | 6.88E-01 |
| LINC00941     | -0.13 | 5.21E-01 | -0.08 | 6.88E-01 |
| LINC00997     | 0.28  | 1.53E-01 | 0.08  | 6.88E-01 |
| LINC01117     | 0.06  | 7.47E-01 | -0.08 | 6.88E-01 |
| MAGOHB        | -0.01 | 9.59E-01 | -0.08 | 6.88E-01 |
| NME1          | -0.02 | 9.24E-01 | 0.08  | 6.88E-01 |
| PAPSS1        | 0.02  | 9.03E-01 | 0.08  | 6.88E-01 |
| RAB41         | -0.22 | 2.51E-01 | -0.08 | 6.88E-01 |
| RASD2         | 0.22  | 2.52E-01 | 0.08  | 6.88E-01 |
| RBM28         | -0.06 | 7.77E-01 | -0.08 | 6.88E-01 |
| RCN2          | 0.20  | 3.10E-01 | -0.08 | 6.88E-01 |
| REV3L-IT1     | -0.22 | 2.53E-01 | 0.08  | 6.88E-01 |
| RLIM          | 0.42  | 2.43E-02 | -0.08 | 6.88E-01 |
| RP1-257I20.14 | -0.31 | 1.11E-01 | -0.08 | 6.88E-01 |
| RP11-12J10.4  | 0.18  | 3.56E-01 | 0.08  | 6.88E-01 |
| RP11-175B9.2  | -0.10 | 6.16E-01 | -0.08 | 6.88E-01 |
| RP11-1H8.5    | -0.14 | 4.81E-01 | -0.08 | 6.88E-01 |
| RP11-356J5.13 | 0.23  | 2.33E-01 | -0.08 | 6.88E-01 |
| RP11-568J23.5 | 0.20  | 3.06E-01 | -0.08 | 6.88E-01 |
| RP11-714L20.1 | -0.20 | 3.17E-01 | 0.08  | 6.88E-01 |
| RP11-863K10.7 | 0.04  | 8.28E-01 | 0.08  | 6.88E-01 |
| RPS15A        | 0.18  | 3.72E-01 | 0.08  | 6.88E-01 |
| SFI1          | -0.24 | 2.09E-01 | -0.08 | 6.88E-01 |
| SRPK3         | -0.10 | 6.01E-01 | -0.08 | 6.88E-01 |
| TDGF1         | -0.17 | 3.86E-01 | 0.08  | 6.88E-01 |
| XLOC_003406   | 0.01  | 9.42E-01 | -0.08 | 6.88E-01 |
| ADGRD2        | -0.32 | 9.27E-02 | -0.08 | 6.89E-01 |
| AGL           | 0.17  | 3.84E-01 | 0.08  | 6.89E-01 |
| ANKRD52       | 0.01  | 9.71E-01 | 0.08  | 6.89E-01 |
| C3orf67       | -0.26 | 1.77E-01 | -0.08 | 6.89E-01 |
| CALHM2        | -0.08 | 7.04E-01 | 0.08  | 6.89E-01 |
| CARD9         | 0.05  | 7.97E-01 | 0.08  | 6.89E-01 |
| CCDC17        | -0.06 | 7.46E-01 | -0.08 | 6.89E-01 |
| CDH22         | -0.09 | 6.60E-01 | 0.08  | 6.89E-01 |
| CPSF2         | 0.29  | 1.39E-01 | 0.08  | 6.89E-01 |
| EDNRB         | -0.15 | 4.57E-01 | -0.08 | 6.89E-01 |
| EIF3FP3       | 0.18  | 3.55E-01 | 0.08  | 6.89E-01 |
| FIBIN         | -0.12 | 5.33E-01 | -0.08 | 6.89E-01 |
| G4330         | -0.02 | 9.38E-01 | -0.08 | 6.89E-01 |
| HMG2P27       | 0.03  | 8.85E-01 | 0.08  | 6.89E-01 |
| IMMT          | 0.09  | 6.44E-01 | 0.08  | 6.89E-01 |

|               |       |          |       |          |
|---------------|-------|----------|-------|----------|
| KPNA6         | 0.16  | 4.05E-01 | -0.08 | 6.89E-01 |
| LRRC37BP1     | 0.05  | 7.96E-01 | -0.08 | 6.89E-01 |
| MAGEE2        | -0.09 | 6.62E-01 | 0.08  | 6.89E-01 |
| NIPAL4        | 0.22  | 2.60E-01 | 0.08  | 6.89E-01 |
| PRRX2         | 0.06  | 7.59E-01 | 0.08  | 6.89E-01 |
| RASA3         | -0.11 | 5.87E-01 | -0.08 | 6.89E-01 |
| RNU6-490P     | -0.14 | 4.75E-01 | -0.08 | 6.89E-01 |
| RP11-183I6.2  | -0.20 | 3.00E-01 | 0.08  | 6.89E-01 |
| RP11-6B19.1   | -0.19 | 3.25E-01 | -0.08 | 6.89E-01 |
| RP5-1057I20.2 | 0.02  | 9.38E-01 | 0.08  | 6.89E-01 |
| RP5-1057I20.6 | 0.29  | 1.29E-01 | 0.08  | 6.89E-01 |
| RP5-999L4.2   | 0.00  | 9.97E-01 | 0.08  | 6.89E-01 |
| RPL7P1        | -0.04 | 8.46E-01 | 0.08  | 6.89E-01 |
| SERAC1        | -0.24 | 2.09E-01 | -0.08 | 6.89E-01 |
| SERPINA11     | -0.30 | 1.21E-01 | -0.08 | 6.89E-01 |
| SMAGP         | 0.19  | 3.26E-01 | 0.08  | 6.89E-01 |
| SMC5-AS1      | -0.22 | 2.62E-01 | -0.08 | 6.89E-01 |
| SULT1E1       | 0.05  | 7.94E-01 | 0.08  | 6.89E-01 |
| TAX1BP3       | 0.16  | 4.28E-01 | 0.08  | 6.89E-01 |
| THRB-IT1      | 0.00  | 9.93E-01 | 0.08  | 6.89E-01 |
| UBE2G1        | 0.29  | 1.32E-01 | 0.08  | 6.89E-01 |
| ULBP1         | -0.12 | 5.58E-01 | 0.08  | 6.89E-01 |
| AC093627.10   | 0.28  | 1.46E-01 | 0.08  | 6.90E-01 |
| ACSF3         | 0.01  | 9.61E-01 | -0.08 | 6.90E-01 |
| AUP1          | 0.08  | 6.78E-01 | -0.08 | 6.90E-01 |
| C11orf73      | -0.08 | 6.78E-01 | 0.08  | 6.90E-01 |
| CALM2         | 0.12  | 5.56E-01 | -0.08 | 6.90E-01 |
| CASP14        | -0.21 | 2.91E-01 | 0.08  | 6.90E-01 |
| CENPCP1       | -0.03 | 8.70E-01 | -0.08 | 6.90E-01 |
| CTD-2008E3.1  | -0.06 | 7.80E-01 | -0.08 | 6.90E-01 |
| CTD-2265D6.2  | -0.49 | 7.60E-03 | 0.08  | 6.90E-01 |
| CUL9          | 0.05  | 7.99E-01 | 0.08  | 6.90E-01 |
| DRD2          | 0.49  | 8.03E-03 | 0.08  | 6.90E-01 |
| DSCAM         | 0.01  | 9.49E-01 | -0.08 | 6.90E-01 |
| G26247        | 0.01  | 9.53E-01 | 0.08  | 6.90E-01 |
| IRF9          | 0.07  | 7.42E-01 | 0.08  | 6.90E-01 |
| LEMD1         | -0.13 | 5.04E-01 | 0.08  | 6.90E-01 |
| MYRF          | 0.33  | 8.29E-02 | -0.08 | 6.90E-01 |
| PTGS2         | -0.15 | 4.34E-01 | 0.08  | 6.90E-01 |
| RP11-113I22.1 | -0.40 | 3.55E-02 | 0.08  | 6.90E-01 |
| RP11-343B5.1  | -0.15 | 4.38E-01 | -0.08 | 6.90E-01 |
| RP11-397E7.1  | 0.25  | 1.99E-01 | 0.08  | 6.90E-01 |
| RP11-44M6.7   | -0.01 | 9.78E-01 | -0.08 | 6.90E-01 |
| RP11-532F12.5 | -0.03 | 8.97E-01 | 0.08  | 6.90E-01 |
| RP11-674N23.4 | 0.17  | 4.01E-01 | -0.08 | 6.90E-01 |
| RP4-604A21.1  | -0.37 | 4.96E-02 | 0.08  | 6.90E-01 |
| RPL29P33      | -0.12 | 5.46E-01 | 0.08  | 6.90E-01 |

|               |       |          |       |          |
|---------------|-------|----------|-------|----------|
| STX1A         | -0.07 | 7.42E-01 | 0.08  | 6.90E-01 |
| TRIM44        | -0.18 | 3.46E-01 | -0.08 | 6.90E-01 |
| AC004051.2    | -0.01 | 9.68E-01 | -0.08 | 6.92E-01 |
| ALG14         | 0.21  | 2.92E-01 | -0.08 | 6.92E-01 |
| C11orf16      | -0.28 | 1.50E-01 | -0.08 | 6.92E-01 |
| C1GALT1C1     | 0.16  | 4.23E-01 | 0.08  | 6.92E-01 |
| CASP8AP2      | 0.00  | 9.88E-01 | 0.08  | 6.92E-01 |
| CH17-340M24.3 | -0.07 | 7.42E-01 | 0.08  | 6.92E-01 |
| CTB-77H17.1   | -0.29 | 1.28E-01 | 0.08  | 6.92E-01 |
| CTD-2574D22.2 | -0.31 | 1.12E-01 | 0.08  | 6.92E-01 |
| DNAH3         | 0.03  | 8.98E-01 | -0.08 | 6.92E-01 |
| FAM188B       | -0.43 | 2.12E-02 | 0.08  | 6.92E-01 |
| FSTL1         | -0.13 | 5.26E-01 | -0.08 | 6.92E-01 |
| G34278        | -0.37 | 5.14E-02 | -0.08 | 6.92E-01 |
| GLIPR1L1      | -0.24 | 2.25E-01 | -0.08 | 6.92E-01 |
| KRT8P43       | -0.24 | 2.15E-01 | -0.08 | 6.92E-01 |
| LINC00548     | -0.36 | 5.78E-02 | -0.08 | 6.92E-01 |
| LINC01260     | -0.03 | 8.86E-01 | -0.08 | 6.92E-01 |
| NDUFA2        | 0.24  | 2.16E-01 | 0.08  | 6.92E-01 |
| OR7E106P      | -0.09 | 6.67E-01 | 0.08  | 6.92E-01 |
| OR7E7P        | -0.32 | 9.81E-02 | -0.08 | 6.92E-01 |
| PCDHA12       | 0.04  | 8.44E-01 | -0.08 | 6.92E-01 |
| POMK          | 0.13  | 5.14E-01 | 0.08  | 6.92E-01 |
| RANBP1        | 0.06  | 7.79E-01 | -0.08 | 6.92E-01 |
| RP11-132A1.4  | -0.07 | 7.25E-01 | -0.08 | 6.92E-01 |
| RP11-21K12.2  | 0.28  | 1.53E-01 | -0.08 | 6.92E-01 |
| RPL12P21      | 0.28  | 1.46E-01 | 0.08  | 6.92E-01 |
| SPATA41       | -0.04 | 8.56E-01 | 0.08  | 6.92E-01 |
| TSEN34        | 0.10  | 6.28E-01 | -0.08 | 6.92E-01 |
| WIPF2         | 0.24  | 2.09E-01 | 0.08  | 6.92E-01 |
| AC006129.1    | 0.17  | 3.82E-01 | -0.08 | 6.93E-01 |
| AL137127.1    | 0.16  | 4.27E-01 | -0.08 | 6.93E-01 |
| ARF5          | 0.16  | 4.29E-01 | 0.08  | 6.93E-01 |
| ARHGDI1       | 0.25  | 2.05E-01 | 0.08  | 6.93E-01 |
| ARMCX2        | -0.15 | 4.31E-01 | 0.08  | 6.93E-01 |
| ASCL2         | 0.01  | 9.68E-01 | 0.08  | 6.93E-01 |
| CLTA          | 0.21  | 2.91E-01 | 0.08  | 6.93E-01 |
| CRACR2A       | 0.09  | 6.58E-01 | 0.08  | 6.93E-01 |
| CREBRF        | -0.35 | 6.80E-02 | -0.08 | 6.93E-01 |
| CTD-2619J13.3 | -0.17 | 3.95E-01 | -0.08 | 6.93E-01 |
| CXCL9         | 0.32  | 9.18E-02 | 0.08  | 6.93E-01 |
| DIP2A-IT1     | 0.16  | 4.30E-01 | -0.08 | 6.93E-01 |
| DUSP2         | 0.16  | 4.03E-01 | 0.08  | 6.93E-01 |
| EPS8L1        | -0.04 | 8.50E-01 | -0.08 | 6.93E-01 |
| G30962        | 0.04  | 8.35E-01 | 0.08  | 6.93E-01 |
| GUSBP5        | -0.16 | 4.07E-01 | -0.08 | 6.93E-01 |
| HLA-C         | -0.11 | 5.77E-01 | 0.08  | 6.93E-01 |

|                |       |          |       |          |
|----------------|-------|----------|-------|----------|
| HSPA12A        | -0.27 | 1.70E-01 | 0.08  | 6.93E-01 |
| IPCEF1         | 0.35  | 6.64E-02 | -0.08 | 6.93E-01 |
| KRTCAP2        | -0.02 | 9.38E-01 | -0.08 | 6.93E-01 |
| NUBPL          | -0.13 | 5.14E-01 | -0.08 | 6.93E-01 |
| RANGAP1        | 0.24  | 2.15E-01 | 0.08  | 6.93E-01 |
| RP11-135A24.4  | 0.26  | 1.90E-01 | -0.08 | 6.93E-01 |
| RP11-273B20.1  | 0.11  | 5.67E-01 | 0.08  | 6.93E-01 |
| RP11-277A4.4   | 0.17  | 3.82E-01 | 0.08  | 6.93E-01 |
| RP11-293A21.1  | -0.11 | 5.78E-01 | -0.08 | 6.93E-01 |
| RP11-582J16.5  | -0.19 | 3.28E-01 | 0.08  | 6.93E-01 |
| RP3-402G11.26  | -0.12 | 5.49E-01 | 0.08  | 6.93E-01 |
| SEC24A         | 0.25  | 2.04E-01 | -0.08 | 6.93E-01 |
| SYNJ2BP        | 0.18  | 3.52E-01 | 0.08  | 6.93E-01 |
| TCF7L1         | -0.19 | 3.34E-01 | 0.08  | 6.93E-01 |
| TNNT3          | -0.12 | 5.38E-01 | -0.08 | 6.93E-01 |
| TSKS           | -0.24 | 2.22E-01 | 0.08  | 6.93E-01 |
| AC079210.1     | 0.21  | 2.88E-01 | -0.08 | 6.94E-01 |
| AC097359.1     | -0.07 | 7.10E-01 | 0.08  | 6.94E-01 |
| AC131571.2     | 0.43  | 2.37E-02 | 0.08  | 6.94E-01 |
| CENPW          | 0.03  | 8.79E-01 | -0.08 | 6.94E-01 |
| CHPF           | -0.05 | 7.83E-01 | 0.08  | 6.94E-01 |
| CLCA3P         | 0.39  | 4.25E-02 | -0.08 | 6.94E-01 |
| CTD-2410N18.4  | -0.26 | 1.86E-01 | 0.08  | 6.94E-01 |
| EIF4EBP1       | 0.16  | 4.23E-01 | 0.08  | 6.94E-01 |
| ELOVL7         | 0.26  | 1.80E-01 | 0.08  | 6.94E-01 |
| FOXD3-AS1      | -0.10 | 6.24E-01 | -0.08 | 6.94E-01 |
| HIST1H4E       | -0.09 | 6.42E-01 | 0.08  | 6.94E-01 |
| IL20RA         | 0.14  | 4.71E-01 | -0.08 | 6.94E-01 |
| ITPR1-AS1      | -0.01 | 9.70E-01 | 0.08  | 6.94E-01 |
| KLF8           | -0.30 | 1.23E-01 | -0.08 | 6.94E-01 |
| LIN54          | 0.03  | 8.80E-01 | -0.08 | 6.94E-01 |
| MEA1           | -0.03 | 8.68E-01 | 0.08  | 6.94E-01 |
| MPP7           | -0.04 | 8.51E-01 | 0.08  | 6.94E-01 |
| NOP9           | 0.08  | 6.70E-01 | 0.08  | 6.94E-01 |
| NWD2           | 0.16  | 4.25E-01 | 0.08  | 6.94E-01 |
| OSGEP          | -0.25 | 2.02E-01 | 0.08  | 6.94E-01 |
| PRTG           | -0.06 | 7.60E-01 | 0.08  | 6.94E-01 |
| RBM5-AS1       | -0.06 | 7.73E-01 | -0.08 | 6.94E-01 |
| RNU6-1111P     | -0.01 | 9.75E-01 | 0.08  | 6.94E-01 |
| RP11-1060J15.3 | 0.07  | 7.09E-01 | -0.08 | 6.94E-01 |
| RP11-1103G16.1 | -0.22 | 2.54E-01 | -0.08 | 6.94E-01 |
| RP11-111A22.1  | 0.21  | 2.95E-01 | -0.08 | 6.94E-01 |
| RP11-345K20.2  | -0.40 | 3.56E-02 | -0.08 | 6.94E-01 |
| RP11-438E8.2   | -0.37 | 5.16E-02 | 0.08  | 6.94E-01 |
| RP11-798M19.6  | 0.12  | 5.54E-01 | -0.08 | 6.94E-01 |
| RPS21          | 0.13  | 5.08E-01 | 0.08  | 6.94E-01 |
| RYR3           | -0.09 | 6.56E-01 | 0.08  | 6.94E-01 |



|               |       |          |       |          |
|---------------|-------|----------|-------|----------|
| SCARA5        | -0.28 | 1.54E-01 | -0.08 | 6.94E-01 |
| SEMA4G        | -0.01 | 9.74E-01 | -0.08 | 6.94E-01 |
| 15-Sep        | 0.17  | 3.74E-01 | -0.08 | 6.94E-01 |
| SPATS2        | -0.15 | 4.49E-01 | 0.08  | 6.94E-01 |
| TARDBP        | -0.11 | 5.67E-01 | 0.08  | 6.94E-01 |
| TBCC          | 0.27  | 1.70E-01 | -0.08 | 6.94E-01 |
| VPS37C        | 0.20  | 3.10E-01 | 0.08  | 6.94E-01 |
| XLOC_006303   | 0.30  | 1.16E-01 | 0.08  | 6.94E-01 |
| XLOC_013950   | 0.10  | 5.99E-01 | 0.08  | 6.94E-01 |
| AC007038.7    | -0.01 | 9.69E-01 | -0.08 | 6.95E-01 |
| BEND3         | 0.17  | 3.86E-01 | -0.08 | 6.95E-01 |
| BLCAP         | 0.19  | 3.29E-01 | 0.08  | 6.95E-01 |
| C1QTNF9B-AS1  | -0.03 | 8.86E-01 | -0.08 | 6.95E-01 |
| CCT2          | 0.13  | 5.03E-01 | -0.08 | 6.95E-01 |
| CTB-3M24.1    | 0.08  | 6.99E-01 | -0.08 | 6.95E-01 |
| CTD-2215E18.3 | -0.01 | 9.70E-01 | -0.08 | 6.95E-01 |
| CTD-2568A17.1 | 0.06  | 7.46E-01 | -0.08 | 6.95E-01 |
| CTD-3051D23.4 | -0.31 | 1.07E-01 | 0.08  | 6.95E-01 |
| CYTL1         | -0.24 | 2.25E-01 | 0.08  | 6.95E-01 |
| DCAF16        | -0.16 | 4.19E-01 | -0.08 | 6.95E-01 |
| EGFR-AS1      | -0.19 | 3.24E-01 | -0.08 | 6.95E-01 |
| FGF16         | -0.01 | 9.61E-01 | -0.08 | 6.95E-01 |
| G23691        | 0.25  | 2.08E-01 | 0.08  | 6.95E-01 |
| GTF2IP20      | -0.14 | 4.63E-01 | 0.08  | 6.95E-01 |
| IVNS1ABP      | 0.16  | 4.11E-01 | -0.08 | 6.95E-01 |
| MTFR1         | -0.01 | 9.59E-01 | -0.08 | 6.95E-01 |
| PLRG1         | 0.21  | 2.89E-01 | 0.08  | 6.95E-01 |
| POLR2J        | 0.16  | 4.20E-01 | 0.08  | 6.95E-01 |
| RP1-179N16.3  | -0.11 | 5.68E-01 | -0.08 | 6.95E-01 |
| RP11-10017.3  | 0.05  | 7.82E-01 | -0.08 | 6.95E-01 |
| RP11-322E11.2 | -0.23 | 2.41E-01 | 0.08  | 6.95E-01 |
| RP11-357N13.3 | -0.39 | 3.82E-02 | 0.08  | 6.95E-01 |
| RP11-378A12.1 | 0.46  | 1.32E-02 | -0.08 | 6.95E-01 |
| RP11-612J15.1 | -0.19 | 3.26E-01 | 0.08  | 6.95E-01 |
| RP11-85B7.4   | -0.09 | 6.52E-01 | 0.08  | 6.95E-01 |
| RP5-902P8.10  | -0.12 | 5.32E-01 | -0.08 | 6.95E-01 |
| SLC37A2       | 0.05  | 8.12E-01 | 0.08  | 6.95E-01 |
| SLMAP         | 0.19  | 3.22E-01 | 0.08  | 6.95E-01 |
| SNORA1        | -0.14 | 4.76E-01 | -0.08 | 6.95E-01 |
| TPST2P1       | 0.06  | 7.79E-01 | -0.08 | 6.95E-01 |
| TSC22D4       | -0.10 | 6.20E-01 | 0.08  | 6.95E-01 |
| TXNDC11       | 0.02  | 9.39E-01 | -0.08 | 6.95E-01 |
| UHRF1         | -0.03 | 8.61E-01 | -0.08 | 6.95E-01 |
| XLOC_012740   | 0.00  | 9.86E-01 | 0.08  | 6.95E-01 |
| ZP3           | 0.08  | 6.72E-01 | 0.08  | 6.95E-01 |
| AC006946.16   | -0.19 | 3.36E-01 | 0.08  | 6.96E-01 |
| ALDH8A1       | 0.29  | 1.42E-01 | -0.08 | 6.96E-01 |

|                      |       |          |       |          |
|----------------------|-------|----------|-------|----------|
| <b>BMP2K</b>         | 0.31  | 1.05E-01 | 0.08  | 6.96E-01 |
| <b>BTN2A3P</b>       | -0.16 | 4.20E-01 | 0.08  | 6.96E-01 |
| <b>CLK3</b>          | -0.16 | 4.28E-01 | 0.08  | 6.96E-01 |
| <b>CTB-134H23.3</b>  | -0.08 | 6.80E-01 | -0.08 | 6.96E-01 |
| <b>CTB-50L17.9</b>   | -0.17 | 3.85E-01 | 0.08  | 6.96E-01 |
| <b>CTBS</b>          | 0.03  | 8.70E-01 | -0.08 | 6.96E-01 |
| <b>CXCL14</b>        | 0.09  | 6.38E-01 | 0.08  | 6.96E-01 |
| <b>DBIL5P2</b>       | -0.08 | 7.03E-01 | -0.08 | 6.96E-01 |
| <b>DCAF10</b>        | 0.28  | 1.51E-01 | -0.08 | 6.96E-01 |
| <b>DPY19L2P2</b>     | 0.15  | 4.37E-01 | -0.08 | 6.96E-01 |
| <b>EMC8</b>          | 0.10  | 6.24E-01 | -0.08 | 6.96E-01 |
| <b>EP400</b>         | -0.19 | 3.30E-01 | -0.08 | 6.96E-01 |
| <b>ETV5</b>          | -0.16 | 4.19E-01 | -0.08 | 6.96E-01 |
| <b>ETV7</b>          | 0.07  | 7.30E-01 | 0.08  | 6.96E-01 |
| <b>FAM171A2</b>      | -0.04 | 8.27E-01 | -0.08 | 6.96E-01 |
| <b>G31903</b>        | -0.10 | 6.06E-01 | -0.08 | 6.96E-01 |
| <b>G34396</b>        | -0.16 | 4.21E-01 | -0.08 | 6.96E-01 |
| <b>HPN</b>           | -0.20 | 3.00E-01 | 0.08  | 6.96E-01 |
| <b>HSPE1P11</b>      | -0.01 | 9.56E-01 | 0.08  | 6.96E-01 |
| <b>MIPEPP1</b>       | 0.15  | 4.40E-01 | 0.08  | 6.96E-01 |
| <b>MIR581</b>        | -0.27 | 1.71E-01 | -0.08 | 6.96E-01 |
| <b>MRPL40</b>        | 0.15  | 4.60E-01 | 0.08  | 6.96E-01 |
| <b>NUS1P1</b>        | 0.14  | 4.86E-01 | 0.08  | 6.96E-01 |
| <b>PTP4A1</b>        | 0.18  | 3.48E-01 | -0.08 | 6.96E-01 |
| <b>PYCR2</b>         | 0.24  | 2.14E-01 | 0.08  | 6.96E-01 |
| <b>RN7SL587P</b>     | 0.02  | 9.10E-01 | 0.08  | 6.96E-01 |
| <b>RNU6-541P</b>     | -0.17 | 3.87E-01 | 0.08  | 6.96E-01 |
| <b>RP11-128N14.5</b> | -0.16 | 4.04E-01 | -0.08 | 6.96E-01 |
| <b>RP11-163E9.1</b>  | -0.01 | 9.79E-01 | -0.08 | 6.96E-01 |
| <b>RP11-290L1.4</b>  | 0.19  | 3.27E-01 | -0.08 | 6.96E-01 |
| <b>RP11-319G6.1</b>  | 0.02  | 9.04E-01 | 0.08  | 6.96E-01 |
| <b>RP11-374M1.9</b>  | 0.04  | 8.49E-01 | -0.08 | 6.96E-01 |
| <b>RP11-973H7.3</b>  | 0.15  | 4.36E-01 | -0.08 | 6.96E-01 |
| <b>RP3-403L10.3</b>  | 0.06  | 7.58E-01 | -0.08 | 6.96E-01 |
| <b>STK38</b>         | -0.05 | 7.89E-01 | 0.08  | 6.96E-01 |
| <b>TES</b>           | 0.06  | 7.67E-01 | -0.08 | 6.96E-01 |
| <b>TFDP2</b>         | 0.08  | 6.86E-01 | 0.08  | 6.96E-01 |
| <b>TXNDC5</b>        | 0.35  | 7.20E-02 | 0.08  | 6.96E-01 |
| <b>UBL7-AS1</b>      | -0.08 | 6.94E-01 | -0.08 | 6.96E-01 |
| <b>XLOC_001013</b>   | -0.07 | 7.29E-01 | -0.08 | 6.96E-01 |
| <b>XLOC_005289</b>   | 0.02  | 9.22E-01 | 0.08  | 6.96E-01 |
| <b>AC005253.2</b>    | 0.14  | 4.64E-01 | -0.08 | 6.97E-01 |
| <b>AC008391.1</b>    | -0.01 | 9.76E-01 | 0.08  | 6.97E-01 |
| <b>ASLP1</b>         | 0.34  | 7.42E-02 | -0.08 | 6.97E-01 |
| <b>ATP5G3</b>        | 0.17  | 3.93E-01 | 0.08  | 6.97E-01 |
| <b>BCYRN1</b>        | -0.37 | 5.60E-02 | -0.08 | 6.97E-01 |
| <b>BOLA2B</b>        | -0.15 | 4.49E-01 | -0.08 | 6.97E-01 |

|               |       |          |       |          |
|---------------|-------|----------|-------|----------|
| CCDC127       | -0.06 | 7.73E-01 | 0.08  | 6.97E-01 |
| CTD-2342J14.6 | -0.11 | 5.81E-01 | -0.08 | 6.97E-01 |
| DMD           | -0.32 | 9.33E-02 | -0.08 | 6.97E-01 |
| DNAJC9        | 0.06  | 7.60E-01 | -0.08 | 6.97E-01 |
| GANAB         | 0.02  | 9.06E-01 | 0.08  | 6.97E-01 |
| HSPA8P14      | -0.30 | 1.24E-01 | -0.08 | 6.97E-01 |
| HYLS1         | 0.15  | 4.49E-01 | -0.08 | 6.97E-01 |
| IFFO1         | -0.07 | 7.36E-01 | 0.08  | 6.97E-01 |
| KAT2B         | 0.17  | 4.00E-01 | -0.08 | 6.97E-01 |
| KCTD7         | -0.05 | 8.10E-01 | 0.08  | 6.97E-01 |
| KPTN          | 0.21  | 2.85E-01 | 0.08  | 6.97E-01 |
| LINC00847     | 0.17  | 4.01E-01 | -0.08 | 6.97E-01 |
| LRRC16A       | 0.03  | 8.63E-01 | 0.08  | 6.97E-01 |
| MALRD1        | -0.01 | 9.46E-01 | -0.08 | 6.97E-01 |
| MAST4         | 0.17  | 3.79E-01 | 0.08  | 6.97E-01 |
| MIR100HG      | -0.18 | 3.60E-01 | -0.08 | 6.97E-01 |
| MTMR2         | -0.06 | 7.63E-01 | -0.08 | 6.97E-01 |
| MYH3          | 0.00  | 9.92E-01 | 0.08  | 6.97E-01 |
| PAQR6         | -0.07 | 7.14E-01 | -0.08 | 6.97E-01 |
| PRMT3         | 0.24  | 2.09E-01 | 0.08  | 6.97E-01 |
| PSMA2P1       | 0.19  | 3.29E-01 | -0.08 | 6.97E-01 |
| RCBTB2P1      | 0.01  | 9.59E-01 | -0.08 | 6.97E-01 |
| RNU6-780P     | 0.09  | 6.37E-01 | 0.08  | 6.97E-01 |
| RP1-168P16.1  | -0.13 | 5.09E-01 | -0.08 | 6.97E-01 |
| RP1-261D10.1  | -0.09 | 6.37E-01 | 0.08  | 6.97E-01 |
| RP11-106M3.2  | -0.36 | 5.99E-02 | -0.08 | 6.97E-01 |
| RP11-123C21.1 | 0.40  | 3.73E-02 | -0.08 | 6.97E-01 |
| RP11-136K14.3 | -0.05 | 7.82E-01 | -0.08 | 6.97E-01 |
| RP11-252K23.2 | 0.16  | 4.28E-01 | -0.08 | 6.97E-01 |
| RP11-270F18.2 | 0.15  | 4.43E-01 | 0.08  | 6.97E-01 |
| RP11-429J17.8 | 0.12  | 5.48E-01 | 0.08  | 6.97E-01 |
| RP11-617F23.1 | -0.22 | 2.58E-01 | 0.08  | 6.97E-01 |
| RP11-641C17.3 | -0.15 | 4.53E-01 | 0.08  | 6.97E-01 |
| RPL7AP60      | 0.28  | 1.42E-01 | 0.08  | 6.97E-01 |
| RPLP1         | 0.18  | 3.67E-01 | 0.08  | 6.97E-01 |
| TMEM51-AS1    | 0.26  | 1.76E-01 | 0.08  | 6.97E-01 |
| TRPM1         | -0.33 | 8.45E-02 | -0.08 | 6.97E-01 |
| UBXN7         | -0.02 | 9.17E-01 | 0.08  | 6.97E-01 |
| WNT4          | -0.08 | 6.69E-01 | 0.08  | 6.97E-01 |
| COL4A5        | 0.07  | 7.32E-01 | -0.08 | 6.98E-01 |
| CTD-3222D19.2 | -0.03 | 8.85E-01 | -0.08 | 6.98E-01 |
| FAM192A       | 0.04  | 8.50E-01 | 0.08  | 6.98E-01 |
| GJA6P         | -0.44 | 1.89E-02 | -0.08 | 6.98E-01 |
| HLA-F         | -0.18 | 3.59E-01 | 0.08  | 6.98E-01 |
| IL12RB2       | 0.21  | 2.76E-01 | 0.08  | 6.98E-01 |
| IPPK          | 0.17  | 3.88E-01 | 0.08  | 6.98E-01 |
| KEL           | 0.00  | 9.92E-01 | 0.08  | 6.98E-01 |

|                |       |          |       |          |
|----------------|-------|----------|-------|----------|
| KIAA0368       | 0.07  | 7.11E-01 | -0.08 | 6.98E-01 |
| LINC00865      | 0.03  | 8.74E-01 | -0.08 | 6.98E-01 |
| LINC01545      | -0.18 | 3.62E-01 | -0.08 | 6.98E-01 |
| LRRC74B        | 0.12  | 5.32E-01 | -0.08 | 6.98E-01 |
| MGAT1          | 0.02  | 9.12E-01 | 0.08  | 6.98E-01 |
| MIR215         | -0.17 | 3.86E-01 | -0.08 | 6.98E-01 |
| MVD            | 0.02  | 9.24E-01 | -0.08 | 6.98E-01 |
| NPM1           | 0.13  | 5.11E-01 | -0.08 | 6.98E-01 |
| PHACTR1        | -0.13 | 5.25E-01 | -0.08 | 6.98E-01 |
| PTPRH          | 0.08  | 6.95E-01 | 0.08  | 6.98E-01 |
| RP1-170O19.24  | -0.11 | 5.71E-01 | 0.08  | 6.98E-01 |
| RP1-256G22.2   | -0.19 | 3.46E-01 | -0.08 | 6.98E-01 |
| RP11-1109F11.3 | -0.14 | 4.72E-01 | -0.08 | 6.98E-01 |
| RP11-388M20.1  | -0.05 | 8.11E-01 | -0.08 | 6.98E-01 |
| RP11-831F12.2  | 0.12  | 5.29E-01 | 0.08  | 6.98E-01 |
| RP4-798A10.7   | -0.31 | 1.09E-01 | 0.08  | 6.98E-01 |
| RP5-1011O1.2   | -0.02 | 9.32E-01 | -0.08 | 6.98E-01 |
| SCAF11         | 0.12  | 5.40E-01 | -0.08 | 6.98E-01 |
| 7-Sep          | 0.04  | 8.32E-01 | -0.08 | 6.98E-01 |
| SERPINB7       | 0.22  | 2.55E-01 | -0.08 | 6.98E-01 |
| TAPT1-AS1      | 0.00  | 9.80E-01 | -0.08 | 6.98E-01 |
| TMUB1          | 0.09  | 6.41E-01 | 0.08  | 6.98E-01 |
| TOP2A          | 0.12  | 5.55E-01 | 0.08  | 6.98E-01 |
| ZNF557         | 0.01  | 9.51E-01 | -0.08 | 6.98E-01 |
| AC019118.4     | -0.07 | 7.09E-01 | 0.08  | 6.99E-01 |
| AC093668.2     | 0.00  | 9.89E-01 | 0.08  | 6.99E-01 |
| AC097455.1     | 0.06  | 7.44E-01 | 0.08  | 6.99E-01 |
| AFF4           | 0.19  | 3.24E-01 | -0.08 | 6.99E-01 |
| ATF6           | 0.04  | 8.57E-01 | -0.08 | 6.99E-01 |
| CCL3L1         | -0.01 | 9.79E-01 | 0.08  | 6.99E-01 |
| CDH18          | 0.01  | 9.63E-01 | -0.08 | 6.99E-01 |
| CEBPD          | 0.27  | 1.72E-01 | 0.08  | 6.99E-01 |
| DLGAP4-AS1     | -0.14 | 4.79E-01 | -0.08 | 6.99E-01 |
| DSN1           | -0.04 | 8.24E-01 | 0.08  | 6.99E-01 |
| FAM127A        | 0.03  | 8.73E-01 | 0.08  | 6.99E-01 |
| G23966         | -0.12 | 5.46E-01 | -0.08 | 6.99E-01 |
| GBP7           | 0.26  | 1.79E-01 | 0.08  | 6.99E-01 |
| GFAP           | -0.16 | 4.19E-01 | 0.08  | 6.99E-01 |
| IFNK           | 0.05  | 7.87E-01 | -0.08 | 6.99E-01 |
| KIF22          | 0.09  | 6.35E-01 | 0.08  | 6.99E-01 |
| KRT40          | -0.02 | 9.08E-01 | 0.08  | 6.99E-01 |
| LARP6          | -0.29 | 1.29E-01 | -0.08 | 6.99E-01 |
| LPIN3          | -0.13 | 5.12E-01 | 0.08  | 6.99E-01 |
| LRPPRC         | 0.24  | 2.17E-01 | -0.08 | 6.99E-01 |
| MT-ND6         | 0.32  | 9.84E-02 | -0.08 | 6.99E-01 |
| PGAM1          | 0.29  | 1.36E-01 | 0.08  | 6.99E-01 |
| RN7SKP283      | -0.02 | 9.11E-01 | 0.08  | 6.99E-01 |

|               |       |          |       |          |
|---------------|-------|----------|-------|----------|
| RP11-502F1.1  | -0.40 | 3.27E-02 | -0.08 | 6.99E-01 |
| RP5-1154E9.7  | -0.13 | 5.22E-01 | 0.08  | 6.99E-01 |
| RUSC2         | 0.13  | 4.97E-01 | 0.08  | 6.99E-01 |
| SOS1-IT1      | -0.14 | 4.76E-01 | -0.08 | 6.99E-01 |
| TTLL4         | -0.25 | 1.99E-01 | -0.08 | 6.99E-01 |
| TVP23C        | -0.08 | 6.82E-01 | -0.08 | 6.99E-01 |
| AC104653.1    | 0.08  | 6.98E-01 | 0.08  | 7.01E-01 |
| AC109642.1    | 0.16  | 4.12E-01 | -0.08 | 7.01E-01 |
| ASTN2         | 0.02  | 9.09E-01 | 0.08  | 7.01E-01 |
| CD27-AS1      | -0.12 | 5.50E-01 | 0.08  | 7.01E-01 |
| COIL          | 0.04  | 8.49E-01 | 0.08  | 7.01E-01 |
| CTC-534A2.2   | 0.09  | 6.41E-01 | -0.08 | 7.01E-01 |
| FAM95B1       | -0.01 | 9.78E-01 | -0.08 | 7.01E-01 |
| GAPDHP51      | -0.28 | 1.45E-01 | 0.08  | 7.01E-01 |
| HS6ST1P1      | -0.23 | 2.36E-01 | -0.08 | 7.01E-01 |
| HSP90AB2P     | 0.01  | 9.59E-01 | 0.08  | 7.01E-01 |
| IFI44L        | 0.30  | 1.16E-01 | 0.08  | 7.01E-01 |
| ISOC2         | 0.23  | 2.48E-01 | 0.08  | 7.01E-01 |
| LDHAL6B       | 0.06  | 7.47E-01 | 0.08  | 7.01E-01 |
| MRPL3         | 0.05  | 8.17E-01 | -0.08 | 7.01E-01 |
| MXRA7         | -0.09 | 6.47E-01 | -0.08 | 7.01E-01 |
| RN7SL390P     | -0.06 | 7.61E-01 | -0.08 | 7.01E-01 |
| RP1-78B3.1    | -0.03 | 8.94E-01 | -0.08 | 7.01E-01 |
| RP11-323F24.4 | -0.21 | 2.89E-01 | -0.08 | 7.01E-01 |
| RP11-480I12.2 | -0.01 | 9.42E-01 | 0.08  | 7.01E-01 |
| RP11-504A18.1 | -0.13 | 5.25E-01 | 0.08  | 7.01E-01 |
| RP11-54D18.2  | -0.09 | 6.67E-01 | 0.08  | 7.01E-01 |
| RP11-744O11.2 | -0.05 | 7.82E-01 | 0.08  | 7.01E-01 |
| RP4-775C13.1  | -0.51 | 5.07E-03 | 0.08  | 7.01E-01 |
| RP6-191P20.4  | -0.03 | 8.93E-01 | -0.08 | 7.01E-01 |
| SERBP1        | 0.17  | 3.80E-01 | 0.08  | 7.01E-01 |
| SMIM12        | 0.30  | 1.19E-01 | 0.08  | 7.01E-01 |
| SUPT4H1P1     | 0.14  | 4.83E-01 | 0.08  | 7.01E-01 |
| TTBK2         | -0.23 | 2.39E-01 | 0.08  | 7.01E-01 |
| XLOC_001153   | -0.51 | 5.68E-03 | 0.08  | 7.01E-01 |
| XLOC_004677   | -0.08 | 6.73E-01 | 0.08  | 7.01E-01 |
| ZNF618        | -0.23 | 2.40E-01 | -0.08 | 7.01E-01 |
| AC002398.11   | -0.08 | 6.77E-01 | 0.08  | 7.02E-01 |
| AL137059.1    | -0.16 | 4.20E-01 | -0.08 | 7.02E-01 |
| ANKRD16       | 0.07  | 7.28E-01 | -0.08 | 7.02E-01 |
| BCAS2P2       | -0.12 | 5.34E-01 | -0.08 | 7.02E-01 |
| CFI           | -0.08 | 6.75E-01 | 0.08  | 7.02E-01 |
| CFL2          | 0.09  | 6.65E-01 | -0.08 | 7.02E-01 |
| CTC-239J10.1  | -0.08 | 6.72E-01 | -0.08 | 7.02E-01 |
| CTC-499B15.5  | -0.21 | 2.94E-01 | -0.08 | 7.02E-01 |
| EIF2AK4       | -0.09 | 6.57E-01 | 0.08  | 7.02E-01 |
| ERCC6L        | 0.04  | 8.49E-01 | -0.08 | 7.02E-01 |

|                      |       |          |       |          |
|----------------------|-------|----------|-------|----------|
| <b>FBXO39</b>        | 0.05  | 7.87E-01 | -0.08 | 7.02E-01 |
| <b>FHDC1</b>         | 0.30  | 1.17E-01 | -0.08 | 7.02E-01 |
| <b>FTOP1</b>         | 0.30  | 1.24E-01 | 0.08  | 7.02E-01 |
| <b>G40865</b>        | 0.16  | 4.12E-01 | -0.08 | 7.02E-01 |
| <b>G5931</b>         | -0.19 | 3.33E-01 | 0.08  | 7.02E-01 |
| <b>GAREM</b>         | 0.27  | 1.64E-01 | 0.08  | 7.02E-01 |
| <b>GSTP1</b>         | 0.08  | 6.79E-01 | 0.08  | 7.02E-01 |
| <b>GXYLT1P4</b>      | 0.13  | 4.96E-01 | 0.08  | 7.02E-01 |
| <b>HSPA1B</b>        | -0.22 | 2.62E-01 | 0.08  | 7.02E-01 |
| <b>IGHV5-51</b>      | 0.25  | 1.93E-01 | 0.08  | 7.02E-01 |
| <b>KRT18P34</b>      | 0.22  | 2.58E-01 | 0.08  | 7.02E-01 |
| <b>LMNTD2</b>        | 0.07  | 7.36E-01 | -0.08 | 7.02E-01 |
| <b>MIR194-2HG</b>    | -0.05 | 7.85E-01 | -0.08 | 7.02E-01 |
| <b>NANOGP4</b>       | -0.11 | 5.65E-01 | -0.08 | 7.02E-01 |
| <b>PIM2</b>          | 0.32  | 9.99E-02 | 0.08  | 7.02E-01 |
| <b>PNRC2</b>         | 0.30  | 1.20E-01 | 0.08  | 7.02E-01 |
| <b>PPP1R7</b>        | -0.07 | 7.07E-01 | 0.08  | 7.02E-01 |
| <b>RNU6-1034P</b>    | 0.13  | 5.22E-01 | -0.08 | 7.02E-01 |
| <b>RP11-31207.2</b>  | -0.21 | 2.80E-01 | -0.08 | 7.02E-01 |
| <b>RP11-358L22.3</b> | -0.01 | 9.49E-01 | 0.08  | 7.02E-01 |
| <b>RP11-471B22.2</b> | 0.07  | 7.16E-01 | -0.08 | 7.02E-01 |
| <b>RP11-510N19.5</b> | -0.02 | 9.05E-01 | 0.08  | 7.02E-01 |
| <b>RP11-574O16.1</b> | 0.08  | 6.92E-01 | -0.08 | 7.02E-01 |
| <b>RP5-965F6.2</b>   | -0.03 | 8.92E-01 | 0.08  | 7.02E-01 |
| <b>RPS12P26</b>      | -0.41 | 2.96E-02 | -0.08 | 7.02E-01 |
| <b>SNHG12</b>        | 0.20  | 3.07E-01 | 0.08  | 7.02E-01 |
| <b>THOC7-AS1</b>     | 0.15  | 4.51E-01 | 0.08  | 7.02E-01 |
| <b>THUMPD3-AS1</b>   | -0.11 | 5.63E-01 | -0.08 | 7.02E-01 |
| <b>TMEM71</b>        | 0.00  | 9.99E-01 | 0.08  | 7.02E-01 |
| <b>TRPC4AP</b>       | 0.08  | 6.91E-01 | 0.08  | 7.02E-01 |
| <b>WFDC21P</b>       | 0.08  | 6.69E-01 | -0.08 | 7.02E-01 |
| <b>AC068831.16</b>   | 0.40  | 3.72E-02 | 0.08  | 7.03E-01 |
| <b>ADCY6</b>         | -0.29 | 1.33E-01 | 0.08  | 7.03E-01 |
| <b>ATG4C</b>         | 0.13  | 5.09E-01 | 0.08  | 7.03E-01 |
| <b>ATP5J2</b>        | 0.17  | 4.00E-01 | 0.08  | 7.03E-01 |
| <b>BPGM</b>          | 0.01  | 9.40E-01 | 0.08  | 7.03E-01 |
| <b>CD24P4</b>        | 0.33  | 8.62E-02 | 0.08  | 7.03E-01 |
| <b>CTNNA1</b>        | 0.00  | 9.93E-01 | -0.08 | 7.03E-01 |
| <b>KRT8P44</b>       | -0.08 | 6.72E-01 | -0.08 | 7.03E-01 |
| <b>KRTAP10-4</b>     | -0.15 | 4.32E-01 | 0.08  | 7.03E-01 |
| <b>NDUFB5</b>        | 0.22  | 2.55E-01 | 0.08  | 7.03E-01 |
| <b>NUP98</b>         | 0.13  | 5.18E-01 | -0.08 | 7.03E-01 |
| <b>PDPK1</b>         | 0.02  | 9.08E-01 | -0.08 | 7.03E-01 |
| <b>POFUT1</b>        | 0.32  | 9.53E-02 | 0.08  | 7.03E-01 |
| <b>PPP1R14BP3</b>    | -0.23 | 2.35E-01 | -0.08 | 7.03E-01 |
| <b>PRNP</b>          | 0.12  | 5.41E-01 | 0.08  | 7.03E-01 |
| <b>PRODH</b>         | -0.13 | 5.07E-01 | 0.08  | 7.03E-01 |

|               |       |          |       |          |
|---------------|-------|----------|-------|----------|
| RNGTT         | 0.26  | 1.83E-01 | 0.08  | 7.03E-01 |
| RP11-115H15.2 | 0.03  | 8.98E-01 | 0.08  | 7.03E-01 |
| RP11-274A11.4 | 0.04  | 8.37E-01 | -0.08 | 7.03E-01 |
| RP11-27G14.4  | 0.09  | 6.38E-01 | 0.08  | 7.03E-01 |
| RP3-449M8.9   | -0.09 | 6.33E-01 | -0.08 | 7.03E-01 |
| SCRG1         | -0.25 | 1.94E-01 | -0.08 | 7.03E-01 |
| TARS2         | -0.24 | 2.27E-01 | 0.08  | 7.03E-01 |
| TMEM143       | -0.17 | 3.89E-01 | -0.08 | 7.03E-01 |
| TSR3          | -0.07 | 7.07E-01 | 0.08  | 7.03E-01 |
| WDR46         | 0.11  | 5.78E-01 | -0.08 | 7.03E-01 |
| XRCC4         | 0.11  | 5.92E-01 | -0.08 | 7.03E-01 |
| ZFP36L2       | 0.14  | 4.70E-01 | -0.08 | 7.03E-01 |
| AC000089.3    | 0.20  | 3.01E-01 | 0.08  | 7.04E-01 |
| ATF5          | 0.47  | 1.19E-02 | 0.08  | 7.04E-01 |
| C5orf24       | 0.20  | 3.18E-01 | 0.08  | 7.04E-01 |
| CTD-2545G14.6 | -0.18 | 3.48E-01 | 0.08  | 7.04E-01 |
| CYP51A1       | 0.12  | 5.53E-01 | 0.08  | 7.04E-01 |
| DUSP11        | -0.03 | 8.97E-01 | 0.08  | 7.04E-01 |
| E2F2          | 0.15  | 4.44E-01 | 0.08  | 7.04E-01 |
| LAP3          | 0.33  | 8.40E-02 | 0.08  | 7.04E-01 |
| LRRC8B        | 0.33  | 8.40E-02 | 0.08  | 7.04E-01 |
| PANX1         | 0.12  | 5.27E-01 | 0.08  | 7.04E-01 |
| RP11-425L10.1 | 0.06  | 7.73E-01 | 0.08  | 7.04E-01 |
| RPL7L1        | 0.16  | 4.25E-01 | 0.08  | 7.04E-01 |
| AC006262.5    | 0.00  | 9.93E-01 | -0.08 | 7.04E-01 |
| ANKRD40       | 0.18  | 3.71E-01 | -0.08 | 7.04E-01 |
| C5orf63       | 0.05  | 8.15E-01 | -0.08 | 7.04E-01 |
| FAM228B       | -0.19 | 3.44E-01 | -0.08 | 7.04E-01 |
| G39662        | -0.20 | 3.00E-01 | -0.08 | 7.04E-01 |
| G5880         | 0.31  | 1.14E-01 | -0.08 | 7.04E-01 |
| IMPAD1        | 0.12  | 5.41E-01 | -0.08 | 7.04E-01 |
| LHFPL2        | -0.16 | 4.22E-01 | -0.08 | 7.04E-01 |
| MIR200A       | -0.16 | 4.03E-01 | -0.08 | 7.04E-01 |
| NR3C2         | -0.31 | 1.12E-01 | -0.08 | 7.04E-01 |
| PFKM          | 0.02  | 9.04E-01 | -0.08 | 7.04E-01 |
| RP11-57K17.1  | -0.12 | 5.29E-01 | -0.08 | 7.04E-01 |
| RP11-641C17.2 | -0.32 | 9.81E-02 | -0.08 | 7.04E-01 |
| RP11-930O11.2 | 0.11  | 5.79E-01 | -0.08 | 7.04E-01 |
| RP11-98C1.2   | 0.27  | 1.60E-01 | -0.08 | 7.04E-01 |
| RP4-633I8.3   | 0.00  | 9.86E-01 | -0.08 | 7.04E-01 |
| SCMH1         | 0.13  | 5.25E-01 | -0.08 | 7.04E-01 |
| SPTBN5        | 0.09  | 6.64E-01 | -0.08 | 7.04E-01 |
| TCP1          | 0.06  | 7.76E-01 | -0.08 | 7.04E-01 |
| ZNF879        | 0.20  | 2.96E-01 | -0.08 | 7.04E-01 |
| BNIP2         | 0.15  | 4.51E-01 | -0.08 | 7.05E-01 |
| DHRS12        | -0.03 | 8.88E-01 | -0.08 | 7.05E-01 |
| DRC3          | 0.08  | 6.75E-01 | -0.08 | 7.05E-01 |

|                 |       |          |       |          |
|-----------------|-------|----------|-------|----------|
| ESRP1           | 0.03  | 8.68E-01 | -0.08 | 7.05E-01 |
| EXT1            | 0.15  | 4.32E-01 | -0.08 | 7.05E-01 |
| FGFR1           | -0.35 | 7.10E-02 | -0.08 | 7.05E-01 |
| HNMT            | -0.25 | 1.95E-01 | -0.08 | 7.05E-01 |
| INPP5E          | -0.03 | 8.78E-01 | -0.08 | 7.05E-01 |
| LRRC10B         | -0.09 | 6.52E-01 | -0.08 | 7.05E-01 |
| RP11-366L5.1    | -0.26 | 1.74E-01 | -0.08 | 7.05E-01 |
| RP11-600F24.7   | -0.17 | 3.73E-01 | -0.08 | 7.05E-01 |
| RPL21P123       | 0.12  | 5.58E-01 | -0.08 | 7.05E-01 |
| SAA1            | 0.28  | 1.51E-01 | -0.08 | 7.05E-01 |
| TPCN2           | -0.08 | 6.68E-01 | -0.08 | 7.05E-01 |
| ZSCAN16         | 0.09  | 6.62E-01 | -0.08 | 7.05E-01 |
| AL160011.1      | -0.25 | 1.93E-01 | 0.08  | 7.05E-01 |
| BAALC-AS2       | 0.14  | 4.79E-01 | 0.08  | 7.05E-01 |
| ENTPD5          | 0.23  | 2.49E-01 | 0.08  | 7.05E-01 |
| GUCY2C          | 0.11  | 5.68E-01 | 0.08  | 7.05E-01 |
| GYG1            | 0.21  | 2.74E-01 | 0.08  | 7.05E-01 |
| HIST1H2BF       | -0.09 | 6.46E-01 | 0.08  | 7.05E-01 |
| HMMR            | 0.25  | 2.02E-01 | 0.08  | 7.05E-01 |
| KANSL3          | 0.29  | 1.32E-01 | 0.08  | 7.05E-01 |
| LMAN2           | 0.10  | 6.06E-01 | 0.08  | 7.05E-01 |
| MRPL28          | 0.13  | 5.19E-01 | 0.08  | 7.05E-01 |
| PRB1            | 0.02  | 9.01E-01 | 0.08  | 7.05E-01 |
| PRSS16          | 0.00  | 9.98E-01 | 0.08  | 7.05E-01 |
| RP1-102G20.4    | -0.10 | 6.14E-01 | 0.08  | 7.05E-01 |
| RP11-104E19.1   | -0.13 | 4.96E-01 | 0.08  | 7.05E-01 |
| RP11-680G24.5   | 0.17  | 3.78E-01 | 0.08  | 7.05E-01 |
| RP11-96D1.5     | -0.04 | 8.51E-01 | 0.08  | 7.05E-01 |
| RP5-855F16.1    | 0.19  | 3.22E-01 | 0.08  | 7.05E-01 |
| RP5-875H3.2     | 0.04  | 8.27E-01 | 0.08  | 7.05E-01 |
| ZMIZ1           | 0.10  | 6.13E-01 | 0.08  | 7.05E-01 |
| AC027601.1      | -0.10 | 6.11E-01 | -0.08 | 7.06E-01 |
| AC092377.1      | 0.16  | 4.15E-01 | -0.08 | 7.06E-01 |
| AMIGO1          | 0.30  | 1.15E-01 | 0.08  | 7.06E-01 |
| CETN2           | 0.12  | 5.52E-01 | 0.08  | 7.06E-01 |
| CKS2            | 0.06  | 7.54E-01 | 0.08  | 7.06E-01 |
| CTB-111H14.1    | 0.08  | 6.68E-01 | -0.08 | 7.06E-01 |
| DBX2            | -0.23 | 2.29E-01 | -0.08 | 7.06E-01 |
| G19572          | -0.07 | 7.37E-01 | -0.08 | 7.06E-01 |
| G24237          | 0.07  | 7.12E-01 | -0.08 | 7.06E-01 |
| G42645          | -0.22 | 2.54E-01 | 0.08  | 7.06E-01 |
| GAL3ST2         | 0.00  | 9.92E-01 | 0.08  | 7.06E-01 |
| GPHA2           | -0.01 | 9.60E-01 | 0.08  | 7.06E-01 |
| KIAA1257        | 0.14  | 4.69E-01 | 0.08  | 7.06E-01 |
| KRT39           | -0.06 | 7.71E-01 | 0.08  | 7.06E-01 |
| LOXNC01-131B10. | 0.11  | 5.87E-01 | 0.08  | 7.06E-01 |
| NAALADL2-AS2    | 0.05  | 8.10E-01 | 0.08  | 7.06E-01 |



|                       |       |          |       |          |
|-----------------------|-------|----------|-------|----------|
| <b>NEMP1</b>          | -0.05 | 8.15E-01 | -0.08 | 7.06E-01 |
| <b>PAK7</b>           | -0.27 | 1.64E-01 | -0.08 | 7.06E-01 |
| <b>PPIL1</b>          | 0.18  | 3.62E-01 | 0.08  | 7.06E-01 |
| <b>PPP2R3A</b>        | 0.16  | 4.02E-01 | 0.08  | 7.06E-01 |
| <b>RNU6-1266P</b>     | 0.15  | 4.39E-01 | -0.08 | 7.06E-01 |
| <b>RP11-1105G2.3</b>  | 0.01  | 9.65E-01 | -0.08 | 7.06E-01 |
| <b>RP11-250B2.5</b>   | -0.06 | 7.75E-01 | 0.08  | 7.06E-01 |
| <b>RP11-304L19.13</b> | -0.06 | 7.45E-01 | 0.08  | 7.06E-01 |
| <b>RP11-426C22.1</b>  | 0.01  | 9.43E-01 | -0.08 | 7.06E-01 |
| <b>RP11-624M8.1</b>   | -0.04 | 8.42E-01 | -0.08 | 7.06E-01 |
| <b>RP11-98I9.4</b>    | 0.00  | 9.90E-01 | -0.08 | 7.06E-01 |
| <b>RP5-1057I20.4</b>  | 0.35  | 7.03E-02 | -0.08 | 7.06E-01 |
| <b>SLC25A23</b>       | 0.17  | 3.94E-01 | -0.08 | 7.06E-01 |
| <b>SLFN12L</b>        | 0.01  | 9.47E-01 | 0.08  | 7.06E-01 |
| <b>SZT2</b>           | -0.15 | 4.55E-01 | -0.08 | 7.06E-01 |
| <b>TMEM125</b>        | -0.09 | 6.58E-01 | -0.08 | 7.06E-01 |
| <b>TRAJ16</b>         | 0.09  | 6.50E-01 | 0.08  | 7.06E-01 |
| <b>TRAV12-2</b>       | 0.36  | 5.78E-02 | 0.08  | 7.06E-01 |
| <b>WWC3</b>           | -0.07 | 7.36E-01 | -0.08 | 7.06E-01 |
| <b>ZFP2</b>           | 0.04  | 8.44E-01 | 0.08  | 7.06E-01 |
| <b>AC016909.1</b>     | -0.04 | 8.23E-01 | 0.08  | 7.07E-01 |
| <b>AFAP1-AS1</b>      | -0.03 | 8.80E-01 | 0.08  | 7.07E-01 |
| <b>AL022476.2</b>     | -0.04 | 8.55E-01 | 0.08  | 7.07E-01 |
| <b>ALOX12-AS1</b>     | 0.02  | 9.15E-01 | 0.08  | 7.07E-01 |
| <b>CRIPT</b>          | -0.07 | 7.33E-01 | 0.08  | 7.07E-01 |
| <b>CTB-189B5.3</b>    | -0.04 | 8.29E-01 | 0.08  | 7.07E-01 |
| <b>FAM111A</b>        | 0.04  | 8.44E-01 | 0.08  | 7.07E-01 |
| <b>GNLY</b>           | 0.17  | 3.96E-01 | 0.08  | 7.07E-01 |
| <b>LAGE3P1</b>        | -0.42 | 2.71E-02 | 0.08  | 7.07E-01 |
| <b>LNX1-AS2</b>       | -0.20 | 3.13E-01 | 0.08  | 7.07E-01 |
| <b>PRRC2B</b>         | -0.17 | 3.82E-01 | 0.08  | 7.07E-01 |
| <b>RP11-278C7.4</b>   | 0.03  | 8.95E-01 | 0.08  | 7.07E-01 |
| <b>RP4-569M23.5</b>   | 0.15  | 4.48E-01 | 0.08  | 7.07E-01 |
| <b>SLC38A10</b>       | 0.04  | 8.56E-01 | 0.08  | 7.07E-01 |
| <b>TIGD3</b>          | 0.15  | 4.38E-01 | 0.08  | 7.07E-01 |
| <b>TOX4</b>           | 0.23  | 2.29E-01 | 0.08  | 7.07E-01 |
| <b>AC006547.13</b>    | -0.11 | 5.81E-01 | -0.08 | 7.07E-01 |
| <b>AC012360.4</b>     | 0.19  | 3.34E-01 | -0.08 | 7.07E-01 |
| <b>AL049542.1</b>     | -0.09 | 6.63E-01 | -0.08 | 7.07E-01 |
| <b>AMDHD1</b>         | -0.11 | 5.68E-01 | -0.08 | 7.07E-01 |
| <b>FCN1</b>           | -0.01 | 9.55E-01 | -0.08 | 7.07E-01 |
| <b>HNRNPA1L2</b>      | -0.23 | 2.33E-01 | -0.08 | 7.07E-01 |
| <b>LINC01124</b>      | 0.09  | 6.41E-01 | -0.08 | 7.07E-01 |
| <b>PIGM</b>           | 0.15  | 4.57E-01 | -0.08 | 7.07E-01 |
| <b>RP11-227G15.10</b> | 0.09  | 6.35E-01 | -0.08 | 7.07E-01 |
| <b>RP11-403A21.1</b>  | 0.24  | 2.17E-01 | -0.08 | 7.07E-01 |
| <b>RP11-473M20.9</b>  | 0.00  | 9.82E-01 | -0.08 | 7.07E-01 |

|                      |       |          |       |          |
|----------------------|-------|----------|-------|----------|
| <b>RP11-589F5.3</b>  | 0.15  | 4.45E-01 | -0.08 | 7.07E-01 |
| <b>SRCAP</b>         | -0.23 | 2.32E-01 | -0.08 | 7.07E-01 |
| <b>TAX1BP1</b>       | -0.07 | 7.31E-01 | -0.08 | 7.07E-01 |
| <b>XLOC_009740</b>   | -0.12 | 5.38E-01 | -0.08 | 7.07E-01 |
| <b>ZNF429</b>        | -0.01 | 9.50E-01 | -0.08 | 7.07E-01 |
| <b>AC010150.1</b>    | 0.28  | 1.48E-01 | -0.08 | 7.08E-01 |
| <b>AURKAIP1</b>      | 0.04  | 8.37E-01 | -0.08 | 7.08E-01 |
| <b>BAG4</b>          | 0.21  | 2.91E-01 | 0.08  | 7.08E-01 |
| <b>CBX3</b>          | 0.14  | 4.93E-01 | -0.08 | 7.08E-01 |
| <b>CEACAM5</b>       | 0.22  | 2.52E-01 | -0.08 | 7.08E-01 |
| <b>CGN</b>           | -0.09 | 6.55E-01 | -0.08 | 7.08E-01 |
| <b>ERP27</b>         | 0.09  | 6.43E-01 | 0.08  | 7.08E-01 |
| <b>FASTK</b>         | 0.18  | 3.53E-01 | 0.08  | 7.08E-01 |
| <b>G22770</b>        | -0.40 | 3.65E-02 | -0.08 | 7.08E-01 |
| <b>G39423</b>        | -0.14 | 4.62E-01 | -0.08 | 7.08E-01 |
| <b>HNRNPA2B1</b>     | 0.01  | 9.79E-01 | 0.08  | 7.08E-01 |
| <b>LINC00393</b>     | 0.31  | 1.04E-01 | -0.08 | 7.08E-01 |
| <b>MINPP1</b>        | 0.14  | 4.78E-01 | 0.08  | 7.08E-01 |
| <b>NOL4L</b>         | 0.06  | 7.43E-01 | 0.08  | 7.08E-01 |
| <b>RBM12B</b>        | 0.20  | 3.17E-01 | 0.08  | 7.08E-01 |
| <b>RBP4</b>          | 0.29  | 1.39E-01 | -0.08 | 7.08E-01 |
| <b>RCC2</b>          | 0.09  | 6.62E-01 | 0.08  | 7.08E-01 |
| <b>RN7SKP185</b>     | 0.16  | 4.16E-01 | -0.08 | 7.08E-01 |
| <b>ROR1-AS1</b>      | -0.03 | 8.67E-01 | -0.08 | 7.08E-01 |
| <b>RP1-92O14.6</b>   | -0.17 | 3.86E-01 | 0.08  | 7.08E-01 |
| <b>RP11-271C24.3</b> | -0.38 | 4.56E-02 | -0.08 | 7.08E-01 |
| <b>RP11-287D1.3</b>  | 0.03  | 8.71E-01 | -0.08 | 7.08E-01 |
| <b>RP11-485G7.6</b>  | -0.14 | 4.79E-01 | -0.08 | 7.08E-01 |
| <b>RP11-621L6.2</b>  | -0.04 | 8.41E-01 | 0.08  | 7.08E-01 |
| <b>RP11-667K14.5</b> | -0.29 | 1.38E-01 | -0.08 | 7.08E-01 |
| <b>RP11-70C1.1</b>   | 0.02  | 9.32E-01 | 0.08  | 7.08E-01 |
| <b>SCEL-AS1</b>      | -0.34 | 8.10E-02 | -0.08 | 7.08E-01 |
| <b>SERPINE2</b>      | -0.15 | 4.51E-01 | -0.08 | 7.08E-01 |
| <b>SLC25A39</b>      | 0.34  | 7.54E-02 | 0.08  | 7.08E-01 |
| <b>SLC9A1</b>        | 0.11  | 5.65E-01 | 0.08  | 7.08E-01 |
| <b>SPG7</b>          | -0.11 | 5.92E-01 | -0.08 | 7.08E-01 |
| <b>SRPX2</b>         | -0.07 | 7.41E-01 | -0.08 | 7.08E-01 |
| <b>TALDO1</b>        | 0.16  | 4.25E-01 | 0.08  | 7.08E-01 |
| <b>TMEM123</b>       | 0.30  | 1.26E-01 | 0.08  | 7.08E-01 |
| <b>TPRA1</b>         | 0.03  | 8.66E-01 | 0.08  | 7.08E-01 |
| <b>XLOC_013474</b>   | 0.17  | 3.91E-01 | 0.08  | 7.08E-01 |
| <b>XLOC_014081</b>   | -0.13 | 5.01E-01 | -0.08 | 7.08E-01 |
| <b>ZNF286B</b>       | 0.06  | 7.70E-01 | -0.08 | 7.08E-01 |
| <b>ARHGAP11B</b>     | -0.08 | 6.75E-01 | -0.08 | 7.10E-01 |
| <b>C4orf47</b>       | -0.14 | 4.88E-01 | -0.08 | 7.10E-01 |
| <b>CYP20A1</b>       | -0.01 | 9.48E-01 | -0.08 | 7.10E-01 |
| <b>G26897</b>        | 0.13  | 5.20E-01 | -0.08 | 7.10E-01 |

|               |       |          |       |          |
|---------------|-------|----------|-------|----------|
| GLRX5         | 0.16  | 4.14E-01 | -0.08 | 7.10E-01 |
| HYPK          | -0.15 | 4.41E-01 | -0.08 | 7.10E-01 |
| KRT8P33       | -0.02 | 9.10E-01 | -0.08 | 7.10E-01 |
| MIR93         | -0.06 | 7.48E-01 | -0.08 | 7.10E-01 |
| RDH13         | -0.03 | 8.61E-01 | -0.08 | 7.10E-01 |
| RN7SL724P     | 0.07  | 7.28E-01 | -0.08 | 7.10E-01 |
| RP11-420B22.2 | -0.24 | 2.15E-01 | -0.08 | 7.10E-01 |
| RP11-571L19.8 | 0.12  | 5.59E-01 | -0.08 | 7.10E-01 |
| RP11-58K22.5  | 0.15  | 4.60E-01 | -0.08 | 7.10E-01 |
| RP3-467D16.3  | -0.35 | 7.20E-02 | -0.08 | 7.10E-01 |
| XLOC_001189   | 0.09  | 6.66E-01 | -0.08 | 7.10E-01 |
| XLOC_009869   | -0.25 | 1.93E-01 | -0.08 | 7.10E-01 |
| AC104306.1    | 0.07  | 7.40E-01 | 0.08  | 7.10E-01 |
| ADAMTSL4      | -0.29 | 1.34E-01 | 0.08  | 7.10E-01 |
| CCNT1         | 0.09  | 6.32E-01 | 0.08  | 7.10E-01 |
| DSP           | -0.13 | 5.09E-01 | 0.08  | 7.10E-01 |
| ENSA          | 0.26  | 1.85E-01 | 0.08  | 7.10E-01 |
| FCF1P8        | 0.06  | 7.48E-01 | 0.08  | 7.10E-01 |
| LGALS7B       | -0.09 | 6.41E-01 | 0.08  | 7.10E-01 |
| LINC01057     | -0.06 | 7.62E-01 | 0.08  | 7.10E-01 |
| MAD2L2        | 0.05  | 8.08E-01 | 0.08  | 7.10E-01 |
| MIRLET7BHG    | 0.12  | 5.36E-01 | 0.08  | 7.10E-01 |
| N6AMT2        | 0.09  | 6.39E-01 | 0.08  | 7.10E-01 |
| RP1-137D17.1  | -0.12 | 5.43E-01 | 0.08  | 7.10E-01 |
| RP11-139E19.3 | 0.27  | 1.73E-01 | 0.08  | 7.10E-01 |
| RP11-326N17.1 | -0.14 | 4.79E-01 | 0.08  | 7.10E-01 |
| RP11-529H20.3 | -0.02 | 9.28E-01 | 0.08  | 7.10E-01 |
| RP11-572F4.1  | 0.00  | 9.89E-01 | 0.08  | 7.10E-01 |
| U4            | 0.00  | 9.93E-01 | 0.08  | 7.10E-01 |
| UBTD2         | 0.19  | 3.37E-01 | 0.08  | 7.10E-01 |
| AP001347.6    | -0.13 | 5.09E-01 | -0.07 | 7.11E-01 |
| AP001962.3    | -0.12 | 5.55E-01 | 0.07  | 7.11E-01 |
| CTCF          | 0.07  | 7.32E-01 | 0.07  | 7.11E-01 |
| CTD-2270L9.2  | 0.01  | 9.78E-01 | 0.07  | 7.11E-01 |
| CTD-3247H4.2  | 0.01  | 9.69E-01 | -0.07 | 7.11E-01 |
| DTX1          | 0.01  | 9.66E-01 | 0.07  | 7.11E-01 |
| FAM103A1      | -0.07 | 7.23E-01 | 0.07  | 7.11E-01 |
| FITM2         | 0.04  | 8.28E-01 | -0.07 | 7.11E-01 |
| FUCA1P1       | -0.08 | 6.70E-01 | -0.07 | 7.11E-01 |
| G22346        | -0.12 | 5.29E-01 | 0.07  | 7.11E-01 |
| G26809        | -0.14 | 4.66E-01 | 0.07  | 7.11E-01 |
| GSTM4         | 0.29  | 1.33E-01 | 0.07  | 7.11E-01 |
| KRT18P5       | 0.10  | 5.96E-01 | -0.07 | 7.11E-01 |
| LIN7A         | -0.09 | 6.51E-01 | 0.07  | 7.11E-01 |
| LRFN4         | 0.19  | 3.34E-01 | 0.07  | 7.11E-01 |
| MMADHC        | 0.04  | 8.39E-01 | 0.07  | 7.11E-01 |
| PHLDB3        | 0.18  | 3.59E-01 | 0.07  | 7.11E-01 |

|                      |       |          |       |          |
|----------------------|-------|----------|-------|----------|
| <b>RN7SL398P</b>     | 0.07  | 7.10E-01 | 0.07  | 7.11E-01 |
| <b>RNU6-879P</b>     | -0.03 | 8.69E-01 | 0.07  | 7.11E-01 |
| <b>RNU7-3P</b>       | -0.11 | 5.85E-01 | 0.07  | 7.11E-01 |
| <b>RP11-230C9.3</b>  | -0.15 | 4.42E-01 | 0.07  | 7.11E-01 |
| <b>RP11-254F7.4</b>  | -0.09 | 6.41E-01 | -0.07 | 7.11E-01 |
| <b>RP11-486A14.2</b> | -0.07 | 7.17E-01 | 0.07  | 7.11E-01 |
| <b>RP11-510J16.5</b> | 0.46  | 1.49E-02 | 0.07  | 7.11E-01 |
| <b>RP11-529F4.1</b>  | -0.06 | 7.79E-01 | -0.07 | 7.11E-01 |
| <b>RP11-737O24.5</b> | -0.22 | 2.62E-01 | -0.07 | 7.11E-01 |
| <b>RP11-758P17.3</b> | -0.14 | 4.86E-01 | -0.07 | 7.11E-01 |
| <b>RP11-887P2.3</b>  | 0.29  | 1.30E-01 | 0.07  | 7.11E-01 |
| <b>SCUBE3</b>        | 0.01  | 9.43E-01 | -0.07 | 7.11E-01 |
| <b>TMEM109</b>       | 0.03  | 8.73E-01 | 0.07  | 7.11E-01 |
| <b>UBR4</b>          | -0.23 | 2.31E-01 | 0.07  | 7.11E-01 |
| <b>UPK1A-AS1</b>     | -0.11 | 5.67E-01 | -0.07 | 7.11E-01 |
| <b>YTHDF3</b>        | 0.17  | 3.89E-01 | 0.07  | 7.11E-01 |
| <b>ZNF256</b>        | -0.17 | 3.87E-01 | -0.07 | 7.11E-01 |
| <b>JAK1</b>          | -0.12 | 5.32E-01 | -0.07 | 7.12E-01 |
| <b>KLF5</b>          | 0.05  | 8.17E-01 | -0.07 | 7.12E-01 |
| <b>LAMTOR5-AS1</b>   | -0.05 | 8.12E-01 | -0.07 | 7.12E-01 |
| <b>LINC00696</b>     | 0.04  | 8.57E-01 | -0.07 | 7.12E-01 |
| <b>MAGED2</b>        | -0.17 | 3.89E-01 | -0.07 | 7.12E-01 |
| <b>POLR3B</b>        | 0.13  | 4.94E-01 | -0.07 | 7.12E-01 |
| <b>RP11-296A18.6</b> | -0.04 | 8.51E-01 | -0.07 | 7.12E-01 |
| <b>RP11-517P14.7</b> | -0.22 | 2.62E-01 | -0.07 | 7.12E-01 |
| <b>RP11-793A3.1</b>  | -0.19 | 3.23E-01 | -0.07 | 7.12E-01 |
| <b>RP5-956O18.2</b>  | -0.01 | 9.65E-01 | -0.07 | 7.12E-01 |
| <b>TRPV4</b>         | -0.08 | 6.79E-01 | -0.07 | 7.12E-01 |
| <b>YWHAZ</b>         | -0.06 | 7.59E-01 | -0.07 | 7.12E-01 |
| <b>ARSE</b>          | -0.33 | 8.37E-02 | 0.07  | 7.12E-01 |
| <b>C22orf15</b>      | -0.08 | 6.90E-01 | 0.07  | 7.12E-01 |
| <b>FGF13</b>         | -0.18 | 3.69E-01 | 0.07  | 7.12E-01 |
| <b>IL20RB-AS1</b>    | -0.01 | 9.61E-01 | 0.07  | 7.12E-01 |
| <b>L1CAM</b>         | -0.22 | 2.62E-01 | 0.07  | 7.12E-01 |
| <b>MINA</b>          | 0.35  | 6.89E-02 | 0.07  | 7.12E-01 |
| <b>NUP62</b>         | 0.12  | 5.49E-01 | 0.07  | 7.12E-01 |
| <b>RN7SKP237</b>     | 0.06  | 7.70E-01 | 0.07  | 7.12E-01 |
| <b>RN7SL834P</b>     | -0.08 | 7.03E-01 | 0.07  | 7.12E-01 |
| <b>RNU4-49P</b>      | 0.02  | 9.11E-01 | 0.07  | 7.12E-01 |
| <b>RP11-195B17.1</b> | -0.33 | 8.29E-02 | 0.07  | 7.12E-01 |
| <b>RP11-402L5.2</b>  | -0.03 | 8.81E-01 | 0.07  | 7.12E-01 |
| <b>RP4-758J24.4</b>  | -0.48 | 9.05E-03 | 0.07  | 7.12E-01 |
| <b>ST3GAL1</b>       | 0.22  | 2.68E-01 | 0.07  | 7.12E-01 |
| <b>TMEM92-AS1</b>    | 0.26  | 1.81E-01 | 0.07  | 7.12E-01 |
| <b>TRIM16</b>        | 0.09  | 6.58E-01 | 0.07  | 7.12E-01 |
| <b>U52111.14</b>     | 0.05  | 7.87E-01 | 0.07  | 7.12E-01 |
| <b>UQCR11</b>        | 0.33  | 8.64E-02 | 0.07  | 7.12E-01 |

|               |       |          |       |          |
|---------------|-------|----------|-------|----------|
| URI1          | 0.01  | 9.70E-01 | 0.07  | 7.12E-01 |
| ZNF311        | 0.20  | 2.97E-01 | 0.07  | 7.12E-01 |
| BCDIN3D-AS1   | 0.00  | 9.90E-01 | 0.07  | 7.13E-01 |
| C20orf144     | 0.26  | 1.79E-01 | 0.07  | 7.13E-01 |
| C2orf82       | -0.12 | 5.45E-01 | -0.07 | 7.13E-01 |
| CTC-1337H24.4 | -0.30 | 1.15E-01 | -0.07 | 7.13E-01 |
| CWC25         | -0.22 | 2.71E-01 | -0.07 | 7.13E-01 |
| DLX3          | -0.16 | 4.20E-01 | 0.07  | 7.13E-01 |
| ENOSF1        | -0.08 | 6.86E-01 | -0.07 | 7.13E-01 |
| FAM72B        | 0.26  | 1.78E-01 | -0.07 | 7.13E-01 |
| KCNAB2        | -0.40 | 3.37E-02 | 0.07  | 7.13E-01 |
| KIAA0825      | -0.35 | 6.68E-02 | 0.07  | 7.13E-01 |
| KIAA1429      | -0.08 | 6.81E-01 | 0.07  | 7.13E-01 |
| L3MBTL1       | -0.14 | 4.81E-01 | -0.07 | 7.13E-01 |
| NRCAM         | 0.10  | 6.09E-01 | 0.07  | 7.13E-01 |
| PDGFRL        | -0.20 | 3.08E-01 | -0.07 | 7.13E-01 |
| PKD1P1        | -0.04 | 8.26E-01 | -0.07 | 7.13E-01 |
| PPP2CB        | 0.18  | 3.47E-01 | -0.07 | 7.13E-01 |
| RN7SL781P     | 0.02  | 9.34E-01 | -0.07 | 7.13E-01 |
| RP11-181K12.2 | -0.39 | 4.12E-02 | 0.07  | 7.13E-01 |
| RP11-21M24.3  | 0.26  | 1.88E-01 | -0.07 | 7.13E-01 |
| RP11-274H2.3  | -0.23 | 2.47E-01 | -0.07 | 7.13E-01 |
| RP11-313A24.1 | 0.31  | 1.08E-01 | -0.07 | 7.13E-01 |
| RP11-521B24.3 | 0.20  | 3.11E-01 | 0.07  | 7.13E-01 |
| RP13-638C3.6  | -0.34 | 7.22E-02 | -0.07 | 7.13E-01 |
| RUSC1         | 0.02  | 9.11E-01 | 0.07  | 7.13E-01 |
| SNX31         | -0.08 | 6.77E-01 | -0.07 | 7.13E-01 |
| SRP14         | -0.07 | 7.27E-01 | 0.07  | 7.13E-01 |
| SWT1          | -0.11 | 5.70E-01 | -0.07 | 7.13E-01 |
| TFAP2B        | -0.48 | 1.06E-02 | -0.07 | 7.13E-01 |
| ZDHHC4        | 0.06  | 7.48E-01 | 0.07  | 7.13E-01 |
| AC130360.8    | -0.07 | 7.32E-01 | -0.07 | 7.14E-01 |
| ACAD9         | -0.06 | 7.50E-01 | 0.07  | 7.14E-01 |
| AP000692.9    | 0.12  | 5.44E-01 | 0.07  | 7.14E-01 |
| BRCC3         | 0.07  | 7.37E-01 | 0.07  | 7.14E-01 |
| C14orf2       | 0.13  | 5.08E-01 | 0.07  | 7.14E-01 |
| CBX5          | 0.00  | 9.98E-01 | -0.07 | 7.14E-01 |
| CCM2L         | -0.22 | 2.63E-01 | 0.07  | 7.14E-01 |
| COPE          | 0.14  | 4.72E-01 | 0.07  | 7.14E-01 |
| DMRTA1        | -0.20 | 3.20E-01 | -0.07 | 7.14E-01 |
| EEF1B2P1      | 0.08  | 7.03E-01 | -0.07 | 7.14E-01 |
| FBP2          | -0.01 | 9.55E-01 | -0.07 | 7.14E-01 |
| FUBP3         | 0.04  | 8.56E-01 | -0.07 | 7.14E-01 |
| KDM5A         | -0.20 | 3.16E-01 | -0.07 | 7.14E-01 |
| KDM8          | 0.40  | 3.73E-02 | -0.07 | 7.14E-01 |
| LINC00265     | -0.22 | 2.52E-01 | -0.07 | 7.14E-01 |
| MIR4419A      | -0.10 | 6.05E-01 | -0.07 | 7.14E-01 |

|                |       |          |       |          |
|----------------|-------|----------|-------|----------|
| MIR5579        | -0.40 | 3.60E-02 | -0.07 | 7.14E-01 |
| NCALD          | -0.42 | 2.71E-02 | -0.07 | 7.14E-01 |
| NR2F1-AS1      | -0.09 | 6.67E-01 | 0.07  | 7.14E-01 |
| PCDH19         | -0.14 | 4.77E-01 | 0.07  | 7.14E-01 |
| RNU6-310P      | -0.10 | 6.08E-01 | 0.07  | 7.14E-01 |
| RP11-144I2.1   | 0.11  | 5.63E-01 | 0.07  | 7.14E-01 |
| RP11-156L14.1  | 0.08  | 6.75E-01 | -0.07 | 7.14E-01 |
| RP11-203J24.8  | 0.17  | 4.01E-01 | 0.07  | 7.14E-01 |
| RP11-214K3.22  | -0.08 | 6.77E-01 | 0.07  | 7.14E-01 |
| RP11-218C14.8  | 0.04  | 8.31E-01 | -0.07 | 7.14E-01 |
| RP11-339B21.13 | 0.01  | 9.79E-01 | 0.07  | 7.14E-01 |
| RP11-543B16.1  | -0.18 | 3.60E-01 | 0.07  | 7.14E-01 |
| RP11-59O6.3    | -0.15 | 4.39E-01 | 0.07  | 7.14E-01 |
| RP3-393E18.2   | -0.19 | 3.40E-01 | 0.07  | 7.14E-01 |
| RP4-800G7.1    | 0.16  | 4.22E-01 | -0.07 | 7.14E-01 |
| RPL4           | 0.10  | 5.99E-01 | -0.07 | 7.14E-01 |
| RPS27          | 0.23  | 2.47E-01 | 0.07  | 7.14E-01 |
| SEC61A1        | 0.13  | 5.19E-01 | 0.07  | 7.14E-01 |
| SLC45A3        | 0.17  | 3.80E-01 | 0.07  | 7.14E-01 |
| SNORD103A      | -0.05 | 7.91E-01 | 0.07  | 7.14E-01 |
| STK32A         | -0.45 | 1.53E-02 | -0.07 | 7.14E-01 |
| SUGT1P         | 0.04  | 8.40E-01 | 0.07  | 7.14E-01 |
| TCEB3B         | -0.02 | 9.34E-01 | -0.07 | 7.14E-01 |
| TMEM14C        | 0.09  | 6.63E-01 | 0.07  | 7.14E-01 |
| USP42          | -0.07 | 7.30E-01 | 0.07  | 7.14E-01 |
| ZMIZ2          | 0.04  | 8.27E-01 | 0.07  | 7.14E-01 |
| AGAP9          | 0.16  | 4.02E-01 | 0.07  | 7.15E-01 |
| ALDOB          | 0.29  | 1.39E-01 | -0.07 | 7.15E-01 |
| BBOF1          | 0.19  | 3.27E-01 | 0.07  | 7.15E-01 |
| C22orf34       | -0.14 | 4.90E-01 | 0.07  | 7.15E-01 |
| COG3           | 0.17  | 3.79E-01 | 0.07  | 7.15E-01 |
| ERBB2          | 0.01  | 9.72E-01 | 0.07  | 7.15E-01 |
| FOXF2          | -0.06 | 7.53E-01 | -0.07 | 7.15E-01 |
| G29778         | -0.18 | 3.66E-01 | -0.07 | 7.15E-01 |
| G8261          | 0.00  | 9.90E-01 | 0.07  | 7.15E-01 |
| HDAC9          | -0.21 | 2.89E-01 | 0.07  | 7.15E-01 |
| HLA-A          | -0.06 | 7.55E-01 | 0.07  | 7.15E-01 |
| HOGA1          | 0.17  | 3.79E-01 | -0.07 | 7.15E-01 |
| KCNJ16         | -0.26 | 1.78E-01 | -0.07 | 7.15E-01 |
| KRTAP3-1       | -0.16 | 4.14E-01 | 0.07  | 7.15E-01 |
| MAML2          | -0.38 | 4.31E-02 | 0.07  | 7.15E-01 |
| MAML3          | 0.13  | 5.20E-01 | 0.07  | 7.15E-01 |
| MARCKS         | 0.26  | 1.77E-01 | -0.07 | 7.15E-01 |
| MIR34AHG       | 0.16  | 4.16E-01 | 0.07  | 7.15E-01 |
| MRPL13         | 0.12  | 5.51E-01 | 0.07  | 7.15E-01 |
| NARS           | 0.21  | 2.78E-01 | 0.07  | 7.15E-01 |
| NTF3           | -0.17 | 3.76E-01 | 0.07  | 7.15E-01 |

|               |       |          |       |          |
|---------------|-------|----------|-------|----------|
| PCBD1         | -0.12 | 5.33E-01 | 0.07  | 7.15E-01 |
| PHLDA1        | 0.05  | 7.85E-01 | -0.07 | 7.15E-01 |
| PPP1R37       | 0.13  | 5.01E-01 | -0.07 | 7.15E-01 |
| RP11-144C15.1 | -0.09 | 6.60E-01 | -0.07 | 7.15E-01 |
| RP11-156E6.1  | 0.06  | 7.48E-01 | -0.07 | 7.15E-01 |
| RP11-452L6.1  | 0.24  | 2.16E-01 | -0.07 | 7.15E-01 |
| RP11-484D2.3  | -0.11 | 5.68E-01 | -0.07 | 7.15E-01 |
| RP11-551G24.2 | -0.03 | 8.79E-01 | 0.07  | 7.15E-01 |
| RP11-556O9.2  | -0.13 | 4.96E-01 | -0.07 | 7.15E-01 |
| RP11-705C15.2 | 0.02  | 9.35E-01 | -0.07 | 7.15E-01 |
| RP3-439F8.1   | -0.18 | 3.66E-01 | 0.07  | 7.15E-01 |
| RP5-1099D15.1 | 0.24  | 2.15E-01 | 0.07  | 7.15E-01 |
| RPS24P8       | -0.09 | 6.56E-01 | 0.07  | 7.15E-01 |
| SLC7A2        | 0.23  | 2.41E-01 | 0.07  | 7.15E-01 |
| SLC7A5P1      | 0.04  | 8.51E-01 | 0.07  | 7.15E-01 |
| SNORD14       | -0.14 | 4.81E-01 | 0.07  | 7.15E-01 |
| SPINT1        | 0.17  | 3.81E-01 | 0.07  | 7.15E-01 |
| TP53RK        | 0.24  | 2.22E-01 | -0.07 | 7.15E-01 |
| TTC16         | -0.13 | 5.20E-01 | -0.07 | 7.15E-01 |
| WDR13         | 0.25  | 1.98E-01 | 0.07  | 7.15E-01 |
| XPOTP1        | 0.21  | 2.76E-01 | 0.07  | 7.15E-01 |
| YAE1D1        | 0.07  | 7.23E-01 | 0.07  | 7.15E-01 |
| ZFR           | -0.10 | 6.31E-01 | -0.07 | 7.15E-01 |
| ZMAT2         | 0.01  | 9.66E-01 | -0.07 | 7.15E-01 |
| ZNF132        | 0.23  | 2.36E-01 | -0.07 | 7.15E-01 |
| AATF          | 0.05  | 7.84E-01 | 0.07  | 7.16E-01 |
| AC016700.5    | -0.19 | 3.41E-01 | -0.07 | 7.16E-01 |
| AF124730.4    | 0.04  | 8.49E-01 | 0.07  | 7.16E-01 |
| AL353698.1    | 0.28  | 1.48E-01 | 0.07  | 7.16E-01 |
| ASIC1         | -0.01 | 9.58E-01 | 0.07  | 7.16E-01 |
| BRCC3P1       | -0.10 | 6.01E-01 | 0.07  | 7.16E-01 |
| BRD4          | 0.04  | 8.52E-01 | 0.07  | 7.16E-01 |
| BYSL          | 0.11  | 5.76E-01 | 0.07  | 7.16E-01 |
| CLOCK         | 0.23  | 2.46E-01 | 0.07  | 7.16E-01 |
| CTB-184G21.3  | 0.00  | 9.80E-01 | -0.07 | 7.16E-01 |
| CTD-2373J6.1  | 0.03  | 8.90E-01 | -0.07 | 7.16E-01 |
| CTD-2553C6.1  | 0.16  | 4.20E-01 | -0.07 | 7.16E-01 |
| CTD-3064M3.7  | -0.32 | 1.02E-01 | 0.07  | 7.16E-01 |
| DLGAP4        | 0.04  | 8.22E-01 | 0.07  | 7.16E-01 |
| G32202        | 0.27  | 1.70E-01 | -0.07 | 7.16E-01 |
| GCN1          | 0.02  | 9.25E-01 | 0.07  | 7.16E-01 |
| GEMIN7        | 0.31  | 1.14E-01 | -0.07 | 7.16E-01 |
| HCCS          | 0.01  | 9.76E-01 | 0.07  | 7.16E-01 |
| KAT7          | 0.16  | 4.03E-01 | -0.07 | 7.16E-01 |
| MYBPC3        | -0.27 | 1.58E-01 | 0.07  | 7.16E-01 |
| OR2A9P        | 0.24  | 2.23E-01 | 0.07  | 7.16E-01 |
| PCDHGA10      | -0.06 | 7.48E-01 | 0.07  | 7.16E-01 |

|                      |       |          |       |          |
|----------------------|-------|----------|-------|----------|
| <b>POC1B-GALNT4</b>  | 0.17  | 3.95E-01 | -0.07 | 7.16E-01 |
| <b>RNU6-539P</b>     | -0.19 | 3.24E-01 | 0.07  | 7.16E-01 |
| <b>RP11-173P15.9</b> | -0.12 | 5.54E-01 | -0.07 | 7.16E-01 |
| <b>RP11-211G3.3</b>  | 0.09  | 6.55E-01 | -0.07 | 7.16E-01 |
| <b>RP11-335L23.5</b> | -0.08 | 7.00E-01 | 0.07  | 7.16E-01 |
| <b>RP11-383G10.3</b> | -0.26 | 1.90E-01 | -0.07 | 7.16E-01 |
| <b>RP11-408A13.4</b> | 0.26  | 1.89E-01 | -0.07 | 7.16E-01 |
| <b>RP11-411G7.2</b>  | -0.06 | 7.76E-01 | 0.07  | 7.16E-01 |
| <b>RP11-690I21.1</b> | 0.23  | 2.44E-01 | -0.07 | 7.16E-01 |
| <b>RP11-700F16.3</b> | -0.05 | 7.89E-01 | 0.07  | 7.16E-01 |
| <b>RP11-93M12.1</b>  | 0.17  | 3.82E-01 | 0.07  | 7.16E-01 |
| <b>RP11-98L12.2</b>  | 0.18  | 3.58E-01 | -0.07 | 7.16E-01 |
| <b>RPL13AP6</b>      | -0.04 | 8.46E-01 | 0.07  | 7.16E-01 |
| <b>SEMA3B-AS1</b>    | 0.01  | 9.67E-01 | 0.07  | 7.16E-01 |
| <b>SLC9A3</b>        | 0.04  | 8.42E-01 | 0.07  | 7.16E-01 |
| <b>SORD</b>          | 0.26  | 1.77E-01 | 0.07  | 7.16E-01 |
| <b>TCN2</b>          | -0.13 | 5.23E-01 | 0.07  | 7.16E-01 |
| <b>TMEM130</b>       | 0.04  | 8.58E-01 | -0.07 | 7.16E-01 |
| <b>ZDHHC20-IT1</b>   | -0.06 | 7.46E-01 | 0.07  | 7.16E-01 |
| <b>AC007182.6</b>    | 0.09  | 6.35E-01 | 0.07  | 7.17E-01 |
| <b>AC092573.2</b>    | -0.27 | 1.71E-01 | 0.07  | 7.17E-01 |
| <b>AC139099.5</b>    | -0.04 | 8.44E-01 | 0.07  | 7.17E-01 |
| <b>ARPC4</b>         | 0.16  | 4.25E-01 | 0.07  | 7.17E-01 |
| <b>B4GALT4-AS1</b>   | -0.21 | 2.73E-01 | -0.07 | 7.17E-01 |
| <b>BRSK2</b>         | 0.02  | 9.10E-01 | -0.07 | 7.17E-01 |
| <b>CAMKK2</b>        | -0.11 | 5.64E-01 | 0.07  | 7.17E-01 |
| <b>CDKN3</b>         | 0.13  | 5.15E-01 | 0.07  | 7.17E-01 |
| <b>CST7</b>          | 0.30  | 1.22E-01 | 0.07  | 7.17E-01 |
| <b>CTD-2373N4.3</b>  | 0.06  | 7.58E-01 | -0.07 | 7.17E-01 |
| <b>DUSP7</b>         | 0.20  | 3.14E-01 | -0.07 | 7.17E-01 |
| <b>FANCL</b>         | 0.14  | 4.87E-01 | -0.07 | 7.17E-01 |
| <b>FLAD1</b>         | 0.09  | 6.65E-01 | 0.07  | 7.17E-01 |
| <b>HSPA8P18</b>      | 0.12  | 5.41E-01 | 0.07  | 7.17E-01 |
| <b>IL12A</b>         | -0.19 | 3.27E-01 | -0.07 | 7.17E-01 |
| <b>LAMB4</b>         | -0.17 | 3.76E-01 | -0.07 | 7.17E-01 |
| <b>LINC00659</b>     | 0.13  | 5.02E-01 | -0.07 | 7.17E-01 |
| <b>LINC01136</b>     | -0.11 | 5.85E-01 | 0.07  | 7.17E-01 |
| <b>MYZAP</b>         | -0.05 | 8.02E-01 | 0.07  | 7.17E-01 |
| <b>NAMA</b>          | 0.00  | 1.00E+00 | 0.07  | 7.17E-01 |
| <b>NBAT1</b>         | -0.27 | 1.73E-01 | 0.07  | 7.17E-01 |
| <b>POLA2</b>         | -0.14 | 4.62E-01 | 0.07  | 7.17E-01 |
| <b>RAB11A</b>        | 0.19  | 3.25E-01 | 0.07  | 7.17E-01 |
| <b>RNASEH2B</b>      | -0.12 | 5.54E-01 | -0.07 | 7.17E-01 |
| <b>RNU6-181P</b>     | -0.17 | 3.84E-01 | 0.07  | 7.17E-01 |
| <b>RP11-115C21.4</b> | -0.14 | 4.70E-01 | -0.07 | 7.17E-01 |
| <b>RP11-13N13.6</b>  | -0.04 | 8.40E-01 | -0.07 | 7.17E-01 |
| <b>RP11-1C8.6</b>    | -0.06 | 7.57E-01 | -0.07 | 7.17E-01 |



|               |       |          |       |          |
|---------------|-------|----------|-------|----------|
| RP11-348N5.9  | -0.01 | 9.50E-01 | -0.07 | 7.17E-01 |
| RP11-356J5.4  | 0.14  | 4.86E-01 | -0.07 | 7.17E-01 |
| RP11-368P15.2 | 0.10  | 5.95E-01 | -0.07 | 7.17E-01 |
| RP11-423E7.2  | -0.46 | 1.42E-02 | 0.07  | 7.17E-01 |
| RP11-666F17.2 | -0.11 | 5.91E-01 | -0.07 | 7.17E-01 |
| RP5-1024G6.7  | 0.25  | 1.91E-01 | 0.07  | 7.17E-01 |
| SIGLEC22P     | 0.00  | 9.83E-01 | -0.07 | 7.17E-01 |
| SLC26A8       | -0.07 | 7.42E-01 | 0.07  | 7.17E-01 |
| SNORD101      | 0.11  | 5.71E-01 | -0.07 | 7.17E-01 |
| SPIN2B        | -0.15 | 4.57E-01 | 0.07  | 7.17E-01 |
| TDRKH         | -0.14 | 4.92E-01 | 0.07  | 7.17E-01 |
| TMPRSS5       | -0.18 | 3.71E-01 | -0.07 | 7.17E-01 |
| TOLLIP-AS1    | 0.18  | 3.60E-01 | -0.07 | 7.17E-01 |
| ULBP3         | 0.07  | 7.35E-01 | 0.07  | 7.17E-01 |
| AC003986.7    | 0.21  | 2.85E-01 | -0.07 | 7.19E-01 |
| AC079834.2    | -0.26 | 1.82E-01 | 0.07  | 7.19E-01 |
| AQP4-AS1      | -0.01 | 9.74E-01 | 0.07  | 7.19E-01 |
| CTC-308K20.1  | -0.07 | 7.23E-01 | -0.07 | 7.19E-01 |
| CYBB          | 0.19  | 3.34E-01 | 0.07  | 7.19E-01 |
| DKFZP434K028  | 0.05  | 7.84E-01 | -0.07 | 7.19E-01 |
| ENO1-IT1      | -0.11 | 5.75E-01 | 0.07  | 7.19E-01 |
| FAT3          | 0.03  | 8.95E-01 | -0.07 | 7.19E-01 |
| G34277        | 0.18  | 3.66E-01 | -0.07 | 7.19E-01 |
| G8112         | 0.13  | 5.19E-01 | 0.07  | 7.19E-01 |
| GOLPH3        | 0.11  | 5.89E-01 | -0.07 | 7.19E-01 |
| GPR52         | 0.02  | 9.26E-01 | -0.07 | 7.19E-01 |
| HINFP         | -0.07 | 7.36E-01 | 0.07  | 7.19E-01 |
| HIST2H2AA3    | -0.21 | 2.78E-01 | 0.07  | 7.19E-01 |
| MAGOH         | -0.01 | 9.74E-01 | -0.07 | 7.19E-01 |
| PDZD2         | -0.19 | 3.32E-01 | -0.07 | 7.19E-01 |
| PPM1H         | 0.22  | 2.51E-01 | -0.07 | 7.19E-01 |
| PSMC4         | 0.15  | 4.37E-01 | 0.07  | 7.19E-01 |
| RHOQ          | -0.01 | 9.74E-01 | 0.07  | 7.19E-01 |
| RNY4P10       | 0.04  | 8.56E-01 | -0.07 | 7.19E-01 |
| RP11-10C24.2  | 0.09  | 6.38E-01 | 0.07  | 7.19E-01 |
| RP11-182J1.14 | -0.18 | 3.70E-01 | -0.07 | 7.19E-01 |
| RP11-725P16.2 | -0.02 | 9.16E-01 | -0.07 | 7.19E-01 |
| RPLP0         | 0.23  | 2.48E-01 | 0.07  | 7.19E-01 |
| SLITRK4       | -0.09 | 6.39E-01 | 0.07  | 7.19E-01 |
| SPON1         | -0.10 | 6.28E-01 | 0.07  | 7.19E-01 |
| TAF4          | -0.24 | 2.09E-01 | 0.07  | 7.19E-01 |
| UBXN11        | -0.22 | 2.70E-01 | -0.07 | 7.19E-01 |
| XLOC_002220   | 0.14  | 4.90E-01 | -0.07 | 7.19E-01 |
| YPEL5P2       | -0.15 | 4.54E-01 | -0.07 | 7.19E-01 |
| AC026202.3    | -0.16 | 4.29E-01 | 0.07  | 7.20E-01 |
| AC062017.1    | -0.13 | 5.12E-01 | 0.07  | 7.20E-01 |
| AC091633.3    | 0.17  | 3.84E-01 | -0.07 | 7.20E-01 |

|               |       |          |       |          |
|---------------|-------|----------|-------|----------|
| AL163953.3    | -0.22 | 2.56E-01 | -0.07 | 7.20E-01 |
| AP002495.1    | 0.50  | 7.03E-03 | -0.07 | 7.20E-01 |
| ARL6IP4       | 0.07  | 7.33E-01 | -0.07 | 7.20E-01 |
| CPSF7         | 0.03  | 8.86E-01 | 0.07  | 7.20E-01 |
| CTD-2165H16.4 | 0.05  | 8.12E-01 | 0.07  | 7.20E-01 |
| DDB1          | 0.01  | 9.63E-01 | -0.07 | 7.20E-01 |
| EFTUD1P1      | -0.28 | 1.48E-01 | 0.07  | 7.20E-01 |
| GNB2          | 0.21  | 2.91E-01 | 0.07  | 7.20E-01 |
| GPR160        | 0.14  | 4.86E-01 | -0.07 | 7.20E-01 |
| HPR           | 0.48  | 1.02E-02 | 0.07  | 7.20E-01 |
| ORM2          | 0.22  | 2.71E-01 | 0.07  | 7.20E-01 |
| PHOX2A        | -0.03 | 8.64E-01 | -0.07 | 7.20E-01 |
| RCAN3         | 0.37  | 4.94E-02 | 0.07  | 7.20E-01 |
| RN7SKP243     | 0.20  | 3.05E-01 | 0.07  | 7.20E-01 |
| RN7SL242P     | 0.32  | 9.65E-02 | 0.07  | 7.20E-01 |
| RNU6-404P     | 0.07  | 7.28E-01 | -0.07 | 7.20E-01 |
| RP11-24B13.1  | -0.13 | 5.14E-01 | -0.07 | 7.20E-01 |
| RP11-338E21.3 | -0.06 | 7.45E-01 | 0.07  | 7.20E-01 |
| RP11-357G3.1  | 0.18  | 3.71E-01 | 0.07  | 7.20E-01 |
| RP11-707P17.2 | -0.17 | 3.79E-01 | 0.07  | 7.20E-01 |
| RP11-797H7.1  | -0.22 | 2.61E-01 | 0.07  | 7.20E-01 |
| RP11-932O9.10 | -0.11 | 5.88E-01 | -0.07 | 7.20E-01 |
| RPL35AP32     | 0.15  | 4.32E-01 | 0.07  | 7.20E-01 |
| RPL7P46       | -0.18 | 3.67E-01 | -0.07 | 7.20E-01 |
| ZDHHCS        | 0.18  | 3.52E-01 | 0.07  | 7.20E-01 |
| AC079776.2    | 0.20  | 3.17E-01 | 0.07  | 7.21E-01 |
| AMH           | -0.19 | 3.22E-01 | -0.07 | 7.21E-01 |
| ART1          | -0.14 | 4.69E-01 | 0.07  | 7.21E-01 |
| CEACAMP5      | -0.20 | 3.00E-01 | 0.07  | 7.21E-01 |
| CSNK1G2-AS1   | -0.06 | 7.62E-01 | -0.07 | 7.21E-01 |
| CTD-2576D5.4  | 0.20  | 3.11E-01 | -0.07 | 7.21E-01 |
| CYB561        | -0.05 | 8.09E-01 | 0.07  | 7.21E-01 |
| DCHS1         | -0.16 | 4.23E-01 | -0.07 | 7.21E-01 |
| EFTUD2        | 0.10  | 6.08E-01 | 0.07  | 7.21E-01 |
| EPHA1-AS1     | -0.26 | 1.86E-01 | 0.07  | 7.21E-01 |
| FAM118A       | 0.34  | 8.00E-02 | 0.07  | 7.21E-01 |
| FCF1P1        | -0.17 | 3.88E-01 | -0.07 | 7.21E-01 |
| GPR174        | 0.13  | 5.15E-01 | -0.07 | 7.21E-01 |
| GPR183        | 0.00  | 9.80E-01 | -0.07 | 7.21E-01 |
| IL17RD        | -0.11 | 5.73E-01 | 0.07  | 7.21E-01 |
| KRT85         | -0.12 | 5.31E-01 | -0.07 | 7.21E-01 |
| MSN           | -0.09 | 6.45E-01 | 0.07  | 7.21E-01 |
| PDCD2         | 0.06  | 7.60E-01 | 0.07  | 7.21E-01 |
| PDCL2         | -0.14 | 4.64E-01 | -0.07 | 7.21E-01 |
| PEMT          | 0.13  | 5.02E-01 | -0.07 | 7.21E-01 |
| PKP4          | 0.06  | 7.55E-01 | 0.07  | 7.21E-01 |
| RNU6-1043P    | -0.02 | 9.10E-01 | -0.07 | 7.21E-01 |

|                      |       |          |       |          |
|----------------------|-------|----------|-------|----------|
| <b>RNU6-288P</b>     | -0.07 | 7.21E-01 | -0.07 | 7.21E-01 |
| <b>RNU6-28P</b>      | -0.05 | 8.10E-01 | 0.07  | 7.21E-01 |
| <b>RNY4P7</b>        | 0.01  | 9.40E-01 | 0.07  | 7.21E-01 |
| <b>RP11-144C15.2</b> | 0.14  | 4.86E-01 | 0.07  | 7.21E-01 |
| <b>RP11-214N9.1</b>  | 0.03  | 8.99E-01 | 0.07  | 7.21E-01 |
| <b>RP11-327F22.6</b> | -0.02 | 9.39E-01 | 0.07  | 7.21E-01 |
| <b>RP11-358B23.7</b> | -0.10 | 6.05E-01 | 0.07  | 7.21E-01 |
| <b>RP11-383B4.4</b>  | -0.41 | 3.15E-02 | 0.07  | 7.21E-01 |
| <b>RP11-3D4.4</b>    | 0.12  | 5.51E-01 | -0.07 | 7.21E-01 |
| <b>RP11-484D2.2</b>  | 0.04  | 8.53E-01 | 0.07  | 7.21E-01 |
| <b>RPF1</b>          | 0.13  | 4.94E-01 | -0.07 | 7.21E-01 |
| <b>RSRP1</b>         | 0.04  | 8.41E-01 | -0.07 | 7.21E-01 |
| <b>SOX30</b>         | -0.37 | 5.31E-02 | -0.07 | 7.21E-01 |
| <b>SSR4</b>          | 0.25  | 2.00E-01 | 0.07  | 7.21E-01 |
| <b>A2ML1-AS2</b>     | 0.01  | 9.75E-01 | -0.07 | 7.22E-01 |
| <b>AC093724.2</b>    | 0.36  | 6.22E-02 | 0.07  | 7.22E-01 |
| <b>BRI3P1</b>        | 0.14  | 4.67E-01 | 0.07  | 7.22E-01 |
| <b>C8orf82</b>       | 0.05  | 7.96E-01 | 0.07  | 7.22E-01 |
| <b>CENPM</b>         | 0.13  | 4.93E-01 | 0.07  | 7.22E-01 |
| <b>CNTNAP1</b>       | -0.09 | 6.43E-01 | -0.07 | 7.22E-01 |
| <b>CTC-343N3.1</b>   | -0.07 | 7.26E-01 | -0.07 | 7.22E-01 |
| <b>DKK3</b>          | 0.03  | 8.68E-01 | 0.07  | 7.22E-01 |
| <b>ERH</b>           | 0.17  | 3.79E-01 | 0.07  | 7.22E-01 |
| <b>ESCO2</b>         | 0.02  | 9.01E-01 | -0.07 | 7.22E-01 |
| <b>FAM20C</b>        | -0.07 | 7.42E-01 | 0.07  | 7.22E-01 |
| <b>FGF7</b>          | -0.20 | 3.09E-01 | -0.07 | 7.22E-01 |
| <b>GAPDHP42</b>      | 0.05  | 8.13E-01 | 0.07  | 7.22E-01 |
| <b>HOXC10</b>        | 0.31  | 1.07E-01 | -0.07 | 7.22E-01 |
| <b>LINC01431</b>     | -0.29 | 1.31E-01 | -0.07 | 7.22E-01 |
| <b>MEOX2-AS1</b>     | -0.11 | 5.89E-01 | 0.07  | 7.22E-01 |
| <b>NIPBL</b>         | -0.17 | 3.92E-01 | -0.07 | 7.22E-01 |
| <b>NOM1</b>          | 0.11  | 5.71E-01 | -0.07 | 7.22E-01 |
| <b>NR5A2</b>         | -0.01 | 9.59E-01 | 0.07  | 7.22E-01 |
| <b>NRARP</b>         | 0.07  | 7.14E-01 | -0.07 | 7.22E-01 |
| <b>NUDT6</b>         | -0.27 | 1.60E-01 | 0.07  | 7.22E-01 |
| <b>OSTCP8</b>        | -0.11 | 5.81E-01 | -0.07 | 7.22E-01 |
| <b>PIR</b>           | 0.03  | 8.66E-01 | -0.07 | 7.22E-01 |
| <b>PPL</b>           | -0.06 | 7.51E-01 | 0.07  | 7.22E-01 |
| <b>PRCD</b>          | 0.03  | 8.70E-01 | -0.07 | 7.22E-01 |
| <b>RAB14</b>         | 0.10  | 6.12E-01 | -0.07 | 7.22E-01 |
| <b>RAF1</b>          | 0.21  | 2.82E-01 | -0.07 | 7.22E-01 |
| <b>RP1-140A9.1</b>   | 0.14  | 4.79E-01 | 0.07  | 7.22E-01 |
| <b>RP1-68D18.4</b>   | -0.17 | 3.86E-01 | -0.07 | 7.22E-01 |
| <b>RP11-172H24.4</b> | 0.13  | 5.05E-01 | -0.07 | 7.22E-01 |
| <b>RP11-210M15.2</b> | -0.63 | 2.86E-04 | 0.07  | 7.22E-01 |
| <b>RP11-231L11.3</b> | 0.14  | 4.92E-01 | -0.07 | 7.22E-01 |
| <b>RP11-455F5.5</b>  | -0.02 | 9.04E-01 | -0.07 | 7.22E-01 |

|               |       |          |       |          |
|---------------|-------|----------|-------|----------|
| RP11-497D6.3  | 0.08  | 7.01E-01 | 0.07  | 7.22E-01 |
| RP11-506O24.2 | -0.24 | 2.24E-01 | -0.07 | 7.22E-01 |
| RP11-527N22.1 | -0.24 | 2.18E-01 | 0.07  | 7.22E-01 |
| RP11-575G13.2 | 0.15  | 4.34E-01 | -0.07 | 7.22E-01 |
| RP4-597N16.4  | -0.34 | 7.29E-02 | -0.07 | 7.22E-01 |
| SRSF5         | -0.08 | 6.95E-01 | -0.07 | 7.22E-01 |
| STK36         | -0.12 | 5.29E-01 | 0.07  | 7.22E-01 |
| TFR2          | 0.04  | 8.49E-01 | -0.07 | 7.22E-01 |
| TREH          | 0.00  | 9.93E-01 | 0.07  | 7.22E-01 |
| USP37         | 0.03  | 8.79E-01 | 0.07  | 7.22E-01 |
| XLOC_009415   | -0.11 | 5.92E-01 | -0.07 | 7.22E-01 |
| XLOC_009942   | -0.11 | 5.92E-01 | -0.07 | 7.22E-01 |
| XLOC_014271   | 0.14  | 4.80E-01 | 0.07  | 7.22E-01 |
| AC127904.2    | -0.12 | 5.58E-01 | -0.07 | 7.23E-01 |
| CLK1          | 0.07  | 7.23E-01 | -0.07 | 7.23E-01 |
| CTD-2152M20.2 | 0.03  | 8.63E-01 | -0.07 | 7.23E-01 |
| CTD-3157E16.1 | -0.20 | 3.15E-01 | -0.07 | 7.23E-01 |
| G40298        | 0.10  | 6.09E-01 | -0.07 | 7.23E-01 |
| GRSF1         | 0.23  | 2.41E-01 | -0.07 | 7.23E-01 |
| LA16c-425C2.1 | -0.20 | 3.08E-01 | -0.07 | 7.23E-01 |
| NBPF24        | -0.06 | 7.69E-01 | -0.07 | 7.23E-01 |
| NEUROD2       | -0.18 | 3.66E-01 | -0.07 | 7.23E-01 |
| RP11-463O12.5 | 0.08  | 6.76E-01 | -0.07 | 7.23E-01 |
| RP11-567O18.1 | -0.24 | 2.22E-01 | -0.07 | 7.23E-01 |
| RTN4RL1       | -0.21 | 2.75E-01 | -0.07 | 7.23E-01 |
| SFTPD-AS1     | 0.17  | 3.97E-01 | -0.07 | 7.23E-01 |
| SMARCE1       | -0.09 | 6.43E-01 | -0.07 | 7.23E-01 |
| SNRPA         | -0.09 | 6.59E-01 | -0.07 | 7.23E-01 |
| BNC1          | 0.13  | 5.10E-01 | 0.07  | 7.23E-01 |
| C2orf68       | -0.04 | 8.53E-01 | 0.07  | 7.23E-01 |
| CALCOCO1      | -0.13 | 5.01E-01 | 0.07  | 7.23E-01 |
| CYFIP1        | 0.06  | 7.71E-01 | 0.07  | 7.23E-01 |
| GTF3C6        | 0.16  | 4.16E-01 | 0.07  | 7.23E-01 |
| MAGED1        | -0.21 | 2.75E-01 | 0.07  | 7.23E-01 |
| MIR1290       | -0.24 | 2.23E-01 | 0.07  | 7.23E-01 |
| PELP1         | 0.09  | 6.63E-01 | 0.07  | 7.23E-01 |
| PTPRA         | 0.04  | 8.45E-01 | 0.07  | 7.23E-01 |
| RP11-170M17.2 | -0.25 | 1.94E-01 | 0.07  | 7.23E-01 |
| RP11-226L15.5 | -0.19 | 3.34E-01 | 0.07  | 7.23E-01 |
| RP11-458F8.1  | -0.10 | 6.19E-01 | 0.07  | 7.23E-01 |
| RP11-71H17.8  | -0.04 | 8.36E-01 | 0.07  | 7.23E-01 |
| SNORD12B      | 0.33  | 8.78E-02 | 0.07  | 7.23E-01 |
| TAF15         | -0.15 | 4.36E-01 | 0.07  | 7.23E-01 |
| AC004076.5    | -0.50 | 6.78E-03 | 0.07  | 7.24E-01 |
| AC010136.2    | -0.08 | 6.99E-01 | -0.07 | 7.24E-01 |
| AC135178.1    | -0.06 | 7.44E-01 | 0.07  | 7.24E-01 |
| ADRA2A        | -0.24 | 2.10E-01 | -0.07 | 7.24E-01 |

|                      |       |          |       |          |
|----------------------|-------|----------|-------|----------|
| <b>ARHGEF33</b>      | 0.29  | 1.32E-01 | -0.07 | 7.24E-01 |
| <b>CBR4</b>          | 0.11  | 5.82E-01 | -0.07 | 7.24E-01 |
| <b>CCDC51</b>        | 0.01  | 9.66E-01 | 0.07  | 7.24E-01 |
| <b>CTC-444N24.13</b> | -0.09 | 6.38E-01 | -0.07 | 7.24E-01 |
| <b>CTD-2323K18.1</b> | -0.36 | 6.07E-02 | -0.07 | 7.24E-01 |
| <b>G4403</b>         | -0.40 | 3.69E-02 | -0.07 | 7.24E-01 |
| <b>GPR176</b>        | -0.38 | 4.76E-02 | 0.07  | 7.24E-01 |
| <b>IVD</b>           | 0.04  | 8.21E-01 | 0.07  | 7.24E-01 |
| <b>KLRG1</b>         | 0.13  | 5.08E-01 | -0.07 | 7.24E-01 |
| <b>KPNA2</b>         | 0.21  | 2.88E-01 | 0.07  | 7.24E-01 |
| <b>LINC00471</b>     | -0.16 | 4.08E-01 | 0.07  | 7.24E-01 |
| <b>LPIN1</b>         | 0.43  | 2.10E-02 | 0.07  | 7.24E-01 |
| <b>MSMO1</b>         | 0.06  | 7.46E-01 | -0.07 | 7.24E-01 |
| <b>PFDN1</b>         | -0.06 | 7.50E-01 | 0.07  | 7.24E-01 |
| <b>PGAM1P5</b>       | 0.02  | 9.25E-01 | -0.07 | 7.24E-01 |
| <b>PIK3CD-AS1</b>    | 0.08  | 6.99E-01 | 0.07  | 7.24E-01 |
| <b>PIRT</b>          | 0.18  | 3.69E-01 | -0.07 | 7.24E-01 |
| <b>PTMAP3</b>        | 0.08  | 6.74E-01 | -0.07 | 7.24E-01 |
| <b>PYROXD1</b>       | 0.11  | 5.92E-01 | -0.07 | 7.24E-01 |
| <b>RN7SL695P</b>     | -0.16 | 4.25E-01 | 0.07  | 7.24E-01 |
| <b>RNU1-91P</b>      | -0.40 | 3.55E-02 | 0.07  | 7.24E-01 |
| <b>RP11-269G24.8</b> | -0.45 | 1.63E-02 | 0.07  | 7.24E-01 |
| <b>RP11-539G18.3</b> | 0.06  | 7.46E-01 | -0.07 | 7.24E-01 |
| <b>RP11-546B15.1</b> | -0.51 | 5.10E-03 | -0.07 | 7.24E-01 |
| <b>RP11-61L19.2</b>  | 0.13  | 5.14E-01 | -0.07 | 7.24E-01 |
| <b>RP11-724M22.1</b> | 0.19  | 3.20E-01 | -0.07 | 7.24E-01 |
| <b>RP11-958N24.2</b> | 0.17  | 3.77E-01 | 0.07  | 7.24E-01 |
| <b>RP5-890E16.5</b>  | -0.31 | 1.10E-01 | -0.07 | 7.24E-01 |
| <b>RPL21P121</b>     | -0.19 | 3.37E-01 | -0.07 | 7.24E-01 |
| <b>SDHB</b>          | 0.10  | 6.18E-01 | -0.07 | 7.24E-01 |
| <b>SEH1L</b>         | 0.23  | 2.29E-01 | -0.07 | 7.24E-01 |
| <b>SERPINB2</b>      | 0.22  | 2.66E-01 | 0.07  | 7.24E-01 |
| <b>TMEM9B-AS1</b>    | -0.02 | 9.37E-01 | -0.07 | 7.24E-01 |
| <b>TP53BP2</b>       | 0.03  | 8.77E-01 | -0.07 | 7.24E-01 |
| <b>TSEN15</b>        | 0.02  | 9.10E-01 | 0.07  | 7.24E-01 |
| <b>ZNF627</b>        | -0.21 | 2.79E-01 | -0.07 | 7.24E-01 |
| <b>AHCY</b>          | 0.21  | 2.93E-01 | 0.07  | 7.25E-01 |
| <b>C9orf173</b>      | 0.02  | 9.27E-01 | 0.07  | 7.25E-01 |
| <b>EFS</b>           | -0.16 | 4.16E-01 | 0.07  | 7.25E-01 |
| <b>IL1RN</b>         | 0.10  | 5.98E-01 | 0.07  | 7.25E-01 |
| <b>LLPH</b>          | 0.06  | 7.58E-01 | 0.07  | 7.25E-01 |
| <b>RP1-37N7.1</b>    | 0.14  | 4.87E-01 | 0.07  | 7.25E-01 |
| <b>RP11-108A14.1</b> | 0.10  | 6.25E-01 | 0.07  | 7.25E-01 |
| <b>RP11-218L14.4</b> | -0.42 | 2.65E-02 | 0.07  | 7.25E-01 |
| <b>RP11-58A11.2</b>  | 0.12  | 5.54E-01 | 0.07  | 7.25E-01 |
| <b>RP11-644F5.11</b> | -0.12 | 5.54E-01 | 0.07  | 7.25E-01 |
| <b>RP4-569M23.4</b>  | 0.04  | 8.31E-01 | 0.07  | 7.25E-01 |

|                |       |          |       |          |
|----------------|-------|----------|-------|----------|
| RP5-1185I7.1   | 0.01  | 9.71E-01 | 0.07  | 7.25E-01 |
| RP5-866L20.1   | 0.11  | 5.90E-01 | 0.07  | 7.25E-01 |
| SYNPO2         | 0.00  | 9.88E-01 | 0.07  | 7.25E-01 |
| TEX35          | 0.10  | 6.05E-01 | 0.07  | 7.25E-01 |
| ZNF415         | -0.24 | 2.23E-01 | 0.07  | 7.25E-01 |
| CARD8          | -0.10 | 6.06E-01 | -0.07 | 7.25E-01 |
| CFAP57         | 0.27  | 1.62E-01 | -0.07 | 7.25E-01 |
| CTA-221G9.12   | -0.30 | 1.15E-01 | -0.07 | 7.25E-01 |
| DENND1C        | -0.01 | 9.70E-01 | -0.07 | 7.25E-01 |
| HAUS5          | 0.15  | 4.31E-01 | -0.07 | 7.25E-01 |
| HERC4          | 0.18  | 3.72E-01 | -0.07 | 7.25E-01 |
| HINT3          | 0.12  | 5.42E-01 | -0.07 | 7.25E-01 |
| RN7SL529P      | 0.27  | 1.72E-01 | -0.07 | 7.25E-01 |
| RNF175         | 0.08  | 7.01E-01 | -0.07 | 7.25E-01 |
| RP1-97D16.1    | 0.17  | 3.89E-01 | -0.07 | 7.25E-01 |
| RP11-108L7.14  | -0.08 | 6.96E-01 | -0.07 | 7.25E-01 |
| RP11-277P12.20 | 0.30  | 1.24E-01 | -0.07 | 7.25E-01 |
| RP11-38M8.1    | -0.10 | 6.29E-01 | -0.07 | 7.25E-01 |
| RP11-52J3.2    | -0.20 | 3.17E-01 | -0.07 | 7.25E-01 |
| RP11-67K19.3   | -0.11 | 5.66E-01 | -0.07 | 7.25E-01 |
| RP11-776A13.3  | -0.20 | 3.12E-01 | -0.07 | 7.25E-01 |
| RP4-814D15.1   | -0.04 | 8.48E-01 | -0.07 | 7.25E-01 |
| SVILP1         | -0.14 | 4.90E-01 | -0.07 | 7.25E-01 |
| TRAF3IP2-AS1   | -0.03 | 8.97E-01 | -0.07 | 7.25E-01 |
| AC004862.6     | -0.13 | 5.08E-01 | -0.07 | 7.27E-01 |
| ATG12P2        | 0.03  | 8.95E-01 | -0.07 | 7.27E-01 |
| C12orf80       | -0.05 | 7.88E-01 | -0.07 | 7.27E-01 |
| CAT            | 0.03  | 8.91E-01 | -0.07 | 7.27E-01 |
| KRT78          | -0.21 | 2.78E-01 | -0.07 | 7.27E-01 |
| MT2A           | 0.08  | 6.76E-01 | -0.07 | 7.27E-01 |
| PDE6C          | 0.02  | 9.12E-01 | -0.07 | 7.27E-01 |
| PUS7           | 0.03  | 8.64E-01 | -0.07 | 7.27E-01 |
| RAB30          | -0.27 | 1.69E-01 | -0.07 | 7.27E-01 |
| RITA1          | 0.25  | 1.93E-01 | -0.07 | 7.27E-01 |
| RP11-1167A19.6 | -0.16 | 4.11E-01 | -0.07 | 7.27E-01 |
| RP11-153I24.4  | -0.41 | 3.02E-02 | -0.07 | 7.27E-01 |
| RP11-365P13.5  | -0.07 | 7.36E-01 | -0.07 | 7.27E-01 |
| RP11-539G18.1  | 0.11  | 5.69E-01 | -0.07 | 7.27E-01 |
| RP3-388N13.5   | -0.19 | 3.34E-01 | -0.07 | 7.27E-01 |
| SLC25A2        | 0.03  | 8.97E-01 | -0.07 | 7.27E-01 |
| SRI            | 0.01  | 9.60E-01 | -0.07 | 7.27E-01 |
| TEFM           | 0.05  | 7.91E-01 | -0.07 | 7.27E-01 |
| TMPO           | 0.13  | 5.18E-01 | -0.07 | 7.27E-01 |
| ZNF227         | -0.08 | 6.79E-01 | -0.07 | 7.27E-01 |
| AC009961.3     | -0.13 | 5.09E-01 | 0.07  | 7.27E-01 |
| AMFR           | 0.13  | 5.23E-01 | 0.07  | 7.27E-01 |
| ATRNL1         | 0.18  | 3.66E-01 | 0.07  | 7.27E-01 |

|                      |       |          |       |          |
|----------------------|-------|----------|-------|----------|
| <b>C1orf228</b>      | -0.40 | 3.69E-02 | 0.07  | 7.27E-01 |
| <b>CCDC93</b>        | -0.12 | 5.44E-01 | 0.07  | 7.27E-01 |
| <b>CCNB1IP1P1</b>    | 0.12  | 5.44E-01 | 0.07  | 7.27E-01 |
| <b>CEACAM7</b>       | 0.05  | 7.94E-01 | 0.07  | 7.27E-01 |
| <b>G32932</b>        | 0.06  | 7.71E-01 | 0.07  | 7.27E-01 |
| <b>GTF2IP23</b>      | -0.06 | 7.77E-01 | 0.07  | 7.27E-01 |
| <b>HSPE1P13</b>      | 0.09  | 6.36E-01 | 0.07  | 7.27E-01 |
| <b>LDHA</b>          | 0.14  | 4.64E-01 | 0.07  | 7.27E-01 |
| <b>LRCH3</b>         | 0.23  | 2.33E-01 | 0.07  | 7.27E-01 |
| <b>PRKD1</b>         | -0.63 | 3.71E-04 | 0.07  | 7.27E-01 |
| <b>RNU6-658P</b>     | 0.14  | 4.91E-01 | 0.07  | 7.27E-01 |
| <b>RP5-1147A1.2</b>  | -0.27 | 1.66E-01 | 0.07  | 7.27E-01 |
| <b>SNORD62</b>       | 0.06  | 7.75E-01 | 0.07  | 7.27E-01 |
| <b>ST3GAL1P1</b>     | 0.10  | 6.24E-01 | 0.07  | 7.27E-01 |
| <b>TAGLN</b>         | 0.04  | 8.44E-01 | 0.07  | 7.27E-01 |
| <b>XLOC_004680</b>   | -0.05 | 8.07E-01 | 0.07  | 7.27E-01 |
| <b>XLOC_006658</b>   | -0.23 | 2.43E-01 | 0.07  | 7.27E-01 |
| <b>AC074011.2</b>    | 0.26  | 1.85E-01 | -0.07 | 7.28E-01 |
| <b>AC087650.1</b>    | 0.01  | 9.45E-01 | -0.07 | 7.28E-01 |
| <b>ASXL2</b>         | 0.00  | 9.94E-01 | -0.07 | 7.28E-01 |
| <b>BMPR1APS2</b>     | -0.12 | 5.42E-01 | -0.07 | 7.28E-01 |
| <b>C10orf88</b>      | -0.19 | 3.21E-01 | -0.07 | 7.28E-01 |
| <b>CCDC157</b>       | -0.02 | 9.31E-01 | -0.07 | 7.28E-01 |
| <b>CCDC171</b>       | -0.05 | 8.18E-01 | -0.07 | 7.28E-01 |
| <b>CTD-2372A4.1</b>  | -0.21 | 2.73E-01 | -0.07 | 7.28E-01 |
| <b>CTD-2515H24.2</b> | -0.38 | 4.90E-02 | -0.07 | 7.28E-01 |
| <b>CTD-3025N20.3</b> | -0.18 | 3.46E-01 | -0.07 | 7.28E-01 |
| <b>DLL1</b>          | 0.04  | 8.51E-01 | 0.07  | 7.28E-01 |
| <b>EAF1</b>          | 0.12  | 5.44E-01 | 0.07  | 7.28E-01 |
| <b>G10910</b>        | -0.32 | 1.01E-01 | -0.07 | 7.28E-01 |
| <b>G23007</b>        | -0.03 | 8.82E-01 | -0.07 | 7.28E-01 |
| <b>GRPEL2</b>        | 0.35  | 6.55E-02 | -0.07 | 7.28E-01 |
| <b>LINC01620</b>     | -0.07 | 7.05E-01 | -0.07 | 7.28E-01 |
| <b>NAPG</b>          | 0.18  | 3.54E-01 | -0.07 | 7.28E-01 |
| <b>PKDCC</b>         | -0.27 | 1.57E-01 | 0.07  | 7.28E-01 |
| <b>PLA2G4A</b>       | 0.00  | 9.99E-01 | -0.07 | 7.28E-01 |
| <b>RP11-106D4.2</b>  | 0.04  | 8.27E-01 | -0.07 | 7.28E-01 |
| <b>RP11-271M24.2</b> | 0.06  | 7.52E-01 | -0.07 | 7.28E-01 |
| <b>RP11-334E6.3</b>  | -0.07 | 7.25E-01 | 0.07  | 7.28E-01 |
| <b>RP11-386M24.3</b> | 0.29  | 1.31E-01 | 0.07  | 7.28E-01 |
| <b>RP11-451H23.1</b> | -0.24 | 2.18E-01 | -0.07 | 7.28E-01 |
| <b>RP11-504I13.3</b> | -0.11 | 5.86E-01 | -0.07 | 7.28E-01 |
| <b>SEZ6L2</b>        | -0.18 | 3.64E-01 | -0.07 | 7.28E-01 |
| <b>SLC41A3</b>       | 0.06  | 7.76E-01 | 0.07  | 7.28E-01 |
| <b>SNORD92</b>       | 0.12  | 5.31E-01 | -0.07 | 7.28E-01 |
| <b>TGFA</b>          | 0.31  | 1.09E-01 | 0.07  | 7.28E-01 |
| <b>TMEM181</b>       | 0.05  | 8.19E-01 | 0.07  | 7.28E-01 |

|                       |       |          |       |          |
|-----------------------|-------|----------|-------|----------|
| <b>TOMM20L</b>        | -0.05 | 8.01E-01 | 0.07  | 7.28E-01 |
| <b>XLOC_008981</b>    | -0.18 | 3.60E-01 | 0.07  | 7.28E-01 |
| <b>ZC3H10</b>         | -0.09 | 6.56E-01 | 0.07  | 7.28E-01 |
| <b>ZNF654</b>         | -0.01 | 9.76E-01 | 0.07  | 7.28E-01 |
| <b>ADH7</b>           | 0.17  | 3.82E-01 | -0.07 | 7.29E-01 |
| <b>C11orf87</b>       | 0.14  | 4.80E-01 | -0.07 | 7.29E-01 |
| <b>CBARP</b>          | -0.09 | 6.52E-01 | 0.07  | 7.29E-01 |
| <b>CD1C</b>           | 0.10  | 6.09E-01 | 0.07  | 7.29E-01 |
| <b>CENPBD1P1</b>      | -0.17 | 3.82E-01 | -0.07 | 7.29E-01 |
| <b>CLUHP6</b>         | -0.09 | 6.56E-01 | -0.07 | 7.29E-01 |
| <b>DDX47</b>          | -0.30 | 1.25E-01 | -0.07 | 7.29E-01 |
| <b>EFCAB6</b>         | -0.17 | 4.00E-01 | -0.07 | 7.29E-01 |
| <b>EPB41L4A</b>       | 0.09  | 6.35E-01 | -0.07 | 7.29E-01 |
| <b>FUT8-AS1</b>       | -0.06 | 7.48E-01 | 0.07  | 7.29E-01 |
| <b>G22256</b>         | 0.04  | 8.37E-01 | 0.07  | 7.29E-01 |
| <b>GDF9</b>           | -0.16 | 4.18E-01 | -0.07 | 7.29E-01 |
| <b>GLI4</b>           | -0.04 | 8.31E-01 | -0.07 | 7.29E-01 |
| <b>GPR27</b>          | -0.31 | 1.07E-01 | -0.07 | 7.29E-01 |
| <b>HCP5B</b>          | -0.28 | 1.46E-01 | 0.07  | 7.29E-01 |
| <b>LINC00844</b>      | -0.14 | 4.71E-01 | 0.07  | 7.29E-01 |
| <b>MBNL3</b>          | 0.30  | 1.27E-01 | 0.07  | 7.29E-01 |
| <b>MIR5692C1</b>      | -0.18 | 3.49E-01 | 0.07  | 7.29E-01 |
| <b>RFXANK</b>         | -0.05 | 7.95E-01 | 0.07  | 7.29E-01 |
| <b>RGL4</b>           | 0.10  | 6.20E-01 | -0.07 | 7.29E-01 |
| <b>RN7SL288P</b>      | 0.01  | 9.61E-01 | 0.07  | 7.29E-01 |
| <b>RP11-1348G14.4</b> | -0.09 | 6.54E-01 | -0.07 | 7.29E-01 |
| <b>RP11-1609.2</b>    | 0.01  | 9.78E-01 | -0.07 | 7.29E-01 |
| <b>RP11-338I21.1</b>  | -0.01 | 9.71E-01 | -0.07 | 7.29E-01 |
| <b>RP11-538P18.1</b>  | -0.02 | 9.17E-01 | -0.07 | 7.29E-01 |
| <b>RP11-576I22.2</b>  | -0.31 | 1.10E-01 | -0.07 | 7.29E-01 |
| <b>RPL3</b>           | -0.14 | 4.64E-01 | 0.07  | 7.29E-01 |
| <b>SHC3</b>           | 0.41  | 3.15E-02 | -0.07 | 7.29E-01 |
| <b>SLC14A2</b>        | 0.06  | 7.50E-01 | -0.07 | 7.29E-01 |
| <b>SPATA12</b>        | -0.21 | 2.80E-01 | 0.07  | 7.29E-01 |
| <b>TLR1</b>           | 0.18  | 3.65E-01 | 0.07  | 7.29E-01 |
| <b>TNPO3</b>          | 0.12  | 5.32E-01 | 0.07  | 7.29E-01 |
| <b>TRMT61A</b>        | 0.09  | 6.34E-01 | 0.07  | 7.29E-01 |
| <b>UBTD1</b>          | 0.00  | 9.93E-01 | -0.07 | 7.29E-01 |
| <b>AC002467.7</b>     | -0.32 | 1.02E-01 | 0.07  | 7.30E-01 |
| <b>AF131215.5</b>     | -0.11 | 5.77E-01 | -0.07 | 7.30E-01 |
| <b>AL035422.1</b>     | -0.10 | 6.21E-01 | -0.07 | 7.30E-01 |
| <b>ANKRD26P4</b>      | 0.04  | 8.57E-01 | -0.07 | 7.30E-01 |
| <b>ANKRD44-IT1</b>    | 0.09  | 6.38E-01 | -0.07 | 7.30E-01 |
| <b>ASF1B</b>          | 0.21  | 2.83E-01 | 0.07  | 7.30E-01 |
| <b>BNIP3P42</b>       | 0.18  | 3.70E-01 | -0.07 | 7.30E-01 |
| <b>CASQ2</b>          | 0.14  | 4.80E-01 | 0.07  | 7.30E-01 |
| <b>CD59</b>           | -0.21 | 2.86E-01 | -0.07 | 7.30E-01 |



|               |       |          |       |          |
|---------------|-------|----------|-------|----------|
| G34066        | 0.11  | 5.90E-01 | 0.07  | 7.30E-01 |
| GNE           | -0.17 | 4.00E-01 | 0.07  | 7.30E-01 |
| IL1RL1        | -0.22 | 2.64E-01 | -0.07 | 7.30E-01 |
| KCNIP1        | 0.02  | 9.16E-01 | -0.07 | 7.30E-01 |
| KIF23         | 0.15  | 4.35E-01 | 0.07  | 7.30E-01 |
| LINC01116     | -0.28 | 1.44E-01 | -0.07 | 7.30E-01 |
| MT-RNR1       | 0.35  | 6.55E-02 | 0.07  | 7.30E-01 |
| MTOR-AS1      | -0.03 | 8.91E-01 | -0.07 | 7.30E-01 |
| PPP1R32       | -0.13 | 5.08E-01 | -0.07 | 7.30E-01 |
| RNU6-83P      | 0.12  | 5.36E-01 | -0.07 | 7.30E-01 |
| RNY3P6        | 0.16  | 4.16E-01 | -0.07 | 7.30E-01 |
| RP11-120K24.3 | 0.01  | 9.70E-01 | -0.07 | 7.30E-01 |
| RP11-362K14.5 | 0.33  | 8.32E-02 | 0.07  | 7.30E-01 |
| RP11-486B10.3 | -0.15 | 4.56E-01 | -0.07 | 7.30E-01 |
| RP11-495P10.1 | -0.12 | 5.35E-01 | 0.07  | 7.30E-01 |
| RP11-662M24.1 | -0.02 | 9.16E-01 | 0.07  | 7.30E-01 |
| RP5-1184F4.5  | -0.26 | 1.84E-01 | 0.07  | 7.30E-01 |
| SEC24D        | -0.04 | 8.33E-01 | -0.07 | 7.30E-01 |
| 10-Sep        | -0.02 | 9.33E-01 | 0.07  | 7.30E-01 |
| SRSF1         | 0.05  | 7.87E-01 | -0.07 | 7.30E-01 |
| ST8SIA5       | 0.02  | 9.34E-01 | 0.07  | 7.30E-01 |
| SULT2B1       | 0.23  | 2.36E-01 | 0.07  | 7.30E-01 |
| TGFB1I1       | -0.17 | 3.81E-01 | -0.07 | 7.30E-01 |
| TK1           | 0.06  | 7.43E-01 | 0.07  | 7.30E-01 |
| TMTC1         | 0.03  | 8.89E-01 | -0.07 | 7.30E-01 |
| XLOC_013181   | 0.03  | 8.87E-01 | -0.07 | 7.30E-01 |
| YIPF1         | 0.04  | 8.50E-01 | -0.07 | 7.30E-01 |
| ZNF285        | 0.16  | 4.20E-01 | -0.07 | 7.30E-01 |
| AC116366.6    | -0.16 | 4.04E-01 | -0.07 | 7.31E-01 |
| ANKRD53       | -0.18 | 3.68E-01 | -0.07 | 7.31E-01 |
| BACE1-AS      | -0.16 | 4.13E-01 | -0.07 | 7.31E-01 |
| CADPS         | -0.22 | 2.65E-01 | -0.07 | 7.31E-01 |
| COX10-AS1     | -0.03 | 8.77E-01 | 0.07  | 7.31E-01 |
| CTB-58E17.9   | -0.29 | 1.28E-01 | 0.07  | 7.31E-01 |
| CTD-2003C8.2  | -0.33 | 8.98E-02 | -0.07 | 7.31E-01 |
| FAAHP1        | 0.26  | 1.78E-01 | 0.07  | 7.31E-01 |
| KAT2A         | -0.07 | 7.23E-01 | 0.07  | 7.31E-01 |
| LINC01219     | -0.05 | 8.11E-01 | -0.07 | 7.31E-01 |
| MAP1S         | 0.21  | 2.76E-01 | -0.07 | 7.31E-01 |
| MED27         | 0.19  | 3.46E-01 | 0.07  | 7.31E-01 |
| MRPL44        | 0.25  | 1.94E-01 | -0.07 | 7.31E-01 |
| MTHFD2        | 0.26  | 1.87E-01 | -0.07 | 7.31E-01 |
| NPPC          | 0.01  | 9.77E-01 | -0.07 | 7.31E-01 |
| PRKAR2A       | 0.14  | 4.84E-01 | 0.07  | 7.31E-01 |
| PTPRC         | 0.27  | 1.68E-01 | 0.07  | 7.31E-01 |
| RN7SL300P     | 0.06  | 7.66E-01 | -0.07 | 7.31E-01 |
| RN7SL721P     | 0.32  | 1.01E-01 | 0.07  | 7.31E-01 |

|                      |       |          |       |          |
|----------------------|-------|----------|-------|----------|
| <b>RNA5SP305</b>     | -0.02 | 9.20E-01 | -0.07 | 7.31E-01 |
| <b>RNU6-509P</b>     | 0.04  | 8.24E-01 | 0.07  | 7.31E-01 |
| <b>RP11-104N10.2</b> | 0.09  | 6.46E-01 | -0.07 | 7.31E-01 |
| <b>RP11-269F20.1</b> | 0.03  | 8.82E-01 | -0.07 | 7.31E-01 |
| <b>RP11-322D14.1</b> | 0.03  | 8.93E-01 | -0.07 | 7.31E-01 |
| <b>RP11-386M24.6</b> | 0.28  | 1.45E-01 | 0.07  | 7.31E-01 |
| <b>RP11-477H21.2</b> | 0.14  | 4.75E-01 | 0.07  | 7.31E-01 |
| <b>RP11-504G3.2</b>  | -0.02 | 9.37E-01 | -0.07 | 7.31E-01 |
| <b>RP11-661C3.2</b>  | -0.20 | 3.09E-01 | 0.07  | 7.31E-01 |
| <b>RP11-762L8.6</b>  | 0.04  | 8.30E-01 | -0.07 | 7.31E-01 |
| <b>RP11-93K22.6</b>  | 0.05  | 8.17E-01 | 0.07  | 7.31E-01 |
| <b>RPS15AP16</b>     | 0.04  | 8.24E-01 | 0.07  | 7.31E-01 |
| <b>SERPINI2</b>      | -0.23 | 2.30E-01 | -0.07 | 7.31E-01 |
| <b>SNORD37</b>       | 0.33  | 8.21E-02 | -0.07 | 7.31E-01 |
| <b>SNORD72</b>       | 0.00  | 9.91E-01 | 0.07  | 7.31E-01 |
| <b>TMEM254</b>       | -0.01 | 9.44E-01 | -0.07 | 7.31E-01 |
| <b>TMEM70</b>        | 0.19  | 3.31E-01 | 0.07  | 7.31E-01 |
| <b>TUBA1C</b>        | 0.12  | 5.27E-01 | 0.07  | 7.31E-01 |
| <b>XIAP-AS1</b>      | -0.37 | 5.14E-02 | 0.07  | 7.31E-01 |
| <b>ZNF98</b>         | 0.10  | 5.95E-01 | -0.07 | 7.31E-01 |
| <b>ANO8</b>          | -0.21 | 2.87E-01 | 0.07  | 7.32E-01 |
| <b>C4A</b>           | -0.17 | 3.81E-01 | 0.07  | 7.32E-01 |
| <b>CACNA1C-AS4</b>   | 0.08  | 6.87E-01 | 0.07  | 7.32E-01 |
| <b>CAPN9</b>         | -0.11 | 5.83E-01 | 0.07  | 7.32E-01 |
| <b>CNRIP1</b>        | -0.35 | 6.57E-02 | 0.07  | 7.32E-01 |
| <b>FAM81A</b>        | -0.07 | 7.42E-01 | -0.07 | 7.32E-01 |
| <b>FBXW9</b>         | 0.21  | 2.75E-01 | 0.07  | 7.32E-01 |
| <b>GINS1</b>         | 0.29  | 1.33E-01 | -0.07 | 7.32E-01 |
| <b>HARS</b>          | 0.15  | 4.34E-01 | 0.07  | 7.32E-01 |
| <b>HERPUD2</b>       | -0.01 | 9.42E-01 | 0.07  | 7.32E-01 |
| <b>HSD17B14</b>      | 0.10  | 6.26E-01 | -0.07 | 7.32E-01 |
| <b>KRT17</b>         | 0.14  | 4.75E-01 | 0.07  | 7.32E-01 |
| <b>LST1</b>          | 0.02  | 9.02E-01 | 0.07  | 7.32E-01 |
| <b>MIR1276</b>       | -0.12 | 5.29E-01 | 0.07  | 7.32E-01 |
| <b>MIR320D1</b>      | -0.30 | 1.26E-01 | 0.07  | 7.32E-01 |
| <b>MKNK1-AS1</b>     | 0.01  | 9.69E-01 | -0.07 | 7.32E-01 |
| <b>PAAF1</b>         | -0.05 | 8.15E-01 | 0.07  | 7.32E-01 |
| <b>RP11-120C12.3</b> | -0.11 | 5.64E-01 | 0.07  | 7.32E-01 |
| <b>RP11-227G15.9</b> | -0.22 | 2.65E-01 | 0.07  | 7.32E-01 |
| <b>RP11-274B21.4</b> | -0.06 | 7.53E-01 | 0.07  | 7.32E-01 |
| <b>RP11-317J9.1</b>  | 0.08  | 7.01E-01 | -0.07 | 7.32E-01 |
| <b>RP11-328D5.1</b>  | -0.50 | 6.61E-03 | 0.07  | 7.32E-01 |
| <b>RP11-93B14.10</b> | -0.19 | 3.22E-01 | -0.07 | 7.32E-01 |
| <b>RP5-1092L12.2</b> | -0.28 | 1.49E-01 | -0.07 | 7.32E-01 |
| <b>SYCE1L</b>        | -0.29 | 1.35E-01 | 0.07  | 7.32E-01 |
| <b>TFDP1</b>         | 0.18  | 3.60E-01 | 0.07  | 7.32E-01 |
| <b>TNFAIP6</b>       | -0.29 | 1.40E-01 | 0.07  | 7.32E-01 |

|               |       |          |       |          |
|---------------|-------|----------|-------|----------|
| TPK1          | 0.25  | 1.93E-01 | 0.07  | 7.32E-01 |
| XLOC_007879   | 0.16  | 4.04E-01 | -0.07 | 7.32E-01 |
| ZNF260        | 0.06  | 7.66E-01 | -0.07 | 7.32E-01 |
| ZNF624        | 0.04  | 8.42E-01 | 0.07  | 7.32E-01 |
| ZNF835        | 0.05  | 7.96E-01 | -0.07 | 7.32E-01 |
| ZNRD1         | -0.14 | 4.86E-01 | 0.07  | 7.32E-01 |
| AC007365.3    | 0.07  | 7.28E-01 | -0.07 | 7.33E-01 |
| AC064874.1    | -0.07 | 7.31E-01 | -0.07 | 7.33E-01 |
| C5orf34       | 0.12  | 5.47E-01 | -0.07 | 7.33E-01 |
| CTC-458I2.2   | 0.00  | 9.89E-01 | -0.07 | 7.33E-01 |
| FRG2DP        | -0.21 | 2.73E-01 | -0.07 | 7.33E-01 |
| G28007        | -0.01 | 9.56E-01 | -0.07 | 7.33E-01 |
| GSPT1         | 0.36  | 5.68E-02 | -0.07 | 7.33E-01 |
| KCNT1         | 0.36  | 5.84E-02 | -0.07 | 7.33E-01 |
| MYBPC1        | -0.26 | 1.85E-01 | -0.07 | 7.33E-01 |
| MYLK-AS2      | 0.04  | 8.23E-01 | -0.07 | 7.33E-01 |
| QTRTD1        | 0.08  | 7.02E-01 | -0.07 | 7.33E-01 |
| RCN1          | 0.06  | 7.45E-01 | -0.07 | 7.33E-01 |
| RN7SL187P     | -0.05 | 7.98E-01 | -0.07 | 7.33E-01 |
| RP11-23N2.4   | 0.08  | 7.04E-01 | -0.07 | 7.33E-01 |
| RP11-255H23.4 | -0.03 | 8.62E-01 | -0.07 | 7.33E-01 |
| RP11-525E9.1  | 0.13  | 5.01E-01 | -0.07 | 7.33E-01 |
| RP11-640I15.1 | -0.02 | 9.16E-01 | -0.07 | 7.33E-01 |
| RP11-82O19.1  | -0.11 | 5.62E-01 | -0.07 | 7.33E-01 |
| RP3-521E19.2  | 0.33  | 8.32E-02 | -0.07 | 7.33E-01 |
| USP12-AS1     | -0.19 | 3.40E-01 | -0.07 | 7.33E-01 |
| VWA5B2        | 0.23  | 2.37E-01 | -0.07 | 7.33E-01 |
| Y_RNA         | -0.09 | 6.47E-01 | -0.07 | 7.33E-01 |
| ZNF765        | 0.02  | 9.23E-01 | -0.07 | 7.33E-01 |
| AL133493.2    | 0.07  | 7.22E-01 | 0.07  | 7.33E-01 |
| CABP4         | -0.23 | 2.48E-01 | 0.07  | 7.33E-01 |
| CTC-353G13.1  | 0.31  | 1.03E-01 | 0.07  | 7.33E-01 |
| DGCR6L        | 0.09  | 6.60E-01 | 0.07  | 7.33E-01 |
| G10060        | 0.03  | 8.78E-01 | 0.07  | 7.33E-01 |
| GNA13         | 0.17  | 3.82E-01 | 0.07  | 7.33E-01 |
| MGAT4B        | 0.22  | 2.63E-01 | 0.07  | 7.33E-01 |
| NAPEPLD       | 0.06  | 7.79E-01 | 0.07  | 7.33E-01 |
| RGS1          | 0.03  | 8.70E-01 | 0.07  | 7.33E-01 |
| RP11-473M20.5 | -0.07 | 7.30E-01 | 0.07  | 7.33E-01 |
| SDR16C5       | -0.13 | 4.98E-01 | 0.07  | 7.33E-01 |
| SFRP2         | -0.01 | 9.46E-01 | 0.07  | 7.33E-01 |
| SLC35E2       | -0.15 | 4.44E-01 | 0.07  | 7.33E-01 |
| TIMM10        | 0.09  | 6.63E-01 | 0.07  | 7.33E-01 |
| TSHZ3         | 0.06  | 7.54E-01 | 0.07  | 7.33E-01 |
| AC009299.5    | 0.14  | 4.74E-01 | 0.07  | 7.35E-01 |
| AC018766.6    | -0.09 | 6.60E-01 | -0.07 | 7.35E-01 |
| ACCS          | -0.11 | 5.94E-01 | 0.07  | 7.35E-01 |

|                      |       |          |       |          |
|----------------------|-------|----------|-------|----------|
| <b>ANKS6</b>         | -0.03 | 8.98E-01 | -0.07 | 7.35E-01 |
| <b>ARHGEF6</b>       | -0.18 | 3.68E-01 | 0.07  | 7.35E-01 |
| <b>C7orf73</b>       | 0.08  | 6.85E-01 | 0.07  | 7.35E-01 |
| <b>CTD-2561J22.2</b> | -0.39 | 3.95E-02 | -0.07 | 7.35E-01 |
| <b>CTD-3138B18.4</b> | 0.22  | 2.59E-01 | -0.07 | 7.35E-01 |
| <b>CTNND1</b>        | 0.02  | 9.26E-01 | -0.07 | 7.35E-01 |
| <b>DUSP9</b>         | 0.25  | 1.99E-01 | -0.07 | 7.35E-01 |
| <b>EEF1GP1</b>       | 0.17  | 3.90E-01 | 0.07  | 7.35E-01 |
| <b>FAM13C</b>        | -0.02 | 9.11E-01 | -0.07 | 7.35E-01 |
| <b>FAM96B</b>        | -0.16 | 4.05E-01 | -0.07 | 7.35E-01 |
| <b>FBLL1</b>         | 0.21  | 2.94E-01 | -0.07 | 7.35E-01 |
| <b>KB-1517D11.2</b>  | -0.07 | 7.10E-01 | -0.07 | 7.35E-01 |
| <b>PHAX</b>          | 0.12  | 5.38E-01 | -0.07 | 7.35E-01 |
| <b>PXDNL</b>         | 0.31  | 1.10E-01 | 0.07  | 7.35E-01 |
| <b>RGSL1</b>         | 0.16  | 4.05E-01 | -0.07 | 7.35E-01 |
| <b>RMRPP3</b>        | -0.19 | 3.21E-01 | -0.07 | 7.35E-01 |
| <b>RNA5SP155</b>     | -0.14 | 4.91E-01 | -0.07 | 7.35E-01 |
| <b>RP11-106D4.3</b>  | -0.14 | 4.89E-01 | 0.07  | 7.35E-01 |
| <b>RP11-1148L6.9</b> | 0.04  | 8.40E-01 | -0.07 | 7.35E-01 |
| <b>RP11-166O4.4</b>  | -0.10 | 6.15E-01 | 0.07  | 7.35E-01 |
| <b>RP11-357N13.6</b> | -0.14 | 4.91E-01 | -0.07 | 7.35E-01 |
| <b>RP11-474I16.8</b> | -0.22 | 2.67E-01 | -0.07 | 7.35E-01 |
| <b>RP11-483P21.2</b> | -0.02 | 9.38E-01 | 0.07  | 7.35E-01 |
| <b>RP11-571I18.5</b> | 0.06  | 7.66E-01 | -0.07 | 7.35E-01 |
| <b>RP11-637A17.2</b> | -0.01 | 9.79E-01 | -0.07 | 7.35E-01 |
| <b>RP11-894P9.1</b>  | -0.11 | 5.64E-01 | -0.07 | 7.35E-01 |
| <b>TCHHL1</b>        | -0.13 | 5.20E-01 | 0.07  | 7.35E-01 |
| <b>TJP3</b>          | -0.39 | 3.91E-02 | 0.07  | 7.35E-01 |
| <b>UTP6</b>          | 0.16  | 4.13E-01 | 0.07  | 7.35E-01 |
| <b>WBP1</b>          | -0.16 | 4.12E-01 | -0.07 | 7.35E-01 |
| <b>WISP2</b>         | -0.10 | 6.31E-01 | 0.07  | 7.35E-01 |
| <b>AL022341.3</b>    | 0.01  | 9.72E-01 | -0.07 | 7.36E-01 |
| <b>CGB7</b>          | -0.23 | 2.48E-01 | -0.07 | 7.36E-01 |
| <b>DNAAF2</b>        | 0.23  | 2.46E-01 | -0.07 | 7.36E-01 |
| <b>GKAP1</b>         | -0.17 | 3.79E-01 | -0.07 | 7.36E-01 |
| <b>HAUS2</b>         | 0.03  | 8.89E-01 | -0.07 | 7.36E-01 |
| <b>PDE8A</b>         | 0.32  | 9.93E-02 | -0.07 | 7.36E-01 |
| <b>RN7SL663P</b>     | -0.06 | 7.50E-01 | -0.07 | 7.36E-01 |
| <b>RNU6-1042P</b>    | -0.15 | 4.56E-01 | -0.07 | 7.36E-01 |
| <b>RP11-420L9.5</b>  | 0.04  | 8.56E-01 | -0.07 | 7.36E-01 |
| <b>RP11-46A10.6</b>  | 0.01  | 9.48E-01 | -0.07 | 7.36E-01 |
| <b>SRMS</b>          | 0.37  | 5.12E-02 | -0.07 | 7.36E-01 |
| <b>STAG3L3</b>       | -0.15 | 4.59E-01 | -0.07 | 7.36E-01 |
| <b>TEX21P</b>        | -0.08 | 6.78E-01 | -0.07 | 7.36E-01 |
| <b>XLOC_004107</b>   | 0.06  | 7.72E-01 | -0.07 | 7.36E-01 |
| <b>XLOC_008024</b>   | 0.00  | 9.88E-01 | -0.07 | 7.36E-01 |
| <b>AC005753.1</b>    | -0.11 | 5.93E-01 | 0.07  | 7.36E-01 |

|                |       |          |       |          |
|----------------|-------|----------|-------|----------|
| CDC42-IT1      | 0.17  | 3.77E-01 | 0.07  | 7.36E-01 |
| CTD-2184D3.7   | -0.21 | 2.91E-01 | 0.07  | 7.36E-01 |
| DDX11L9        | -0.31 | 1.04E-01 | 0.07  | 7.36E-01 |
| DPP3           | 0.23  | 2.33E-01 | 0.07  | 7.36E-01 |
| FDXACB1        | 0.15  | 4.43E-01 | 0.07  | 7.36E-01 |
| GPATCH4        | 0.12  | 5.44E-01 | 0.07  | 7.36E-01 |
| KRT18P31       | -0.07 | 7.26E-01 | 0.07  | 7.36E-01 |
| PDE1C          | -0.02 | 9.27E-01 | 0.07  | 7.36E-01 |
| PGK1           | 0.21  | 2.85E-01 | 0.07  | 7.36E-01 |
| PITX2          | 0.12  | 5.43E-01 | 0.07  | 7.36E-01 |
| RAB4A          | 0.14  | 4.79E-01 | 0.07  | 7.36E-01 |
| RP11-219E7.1   | 0.03  | 8.69E-01 | 0.07  | 7.36E-01 |
| RP11-356O9.2   | -0.14 | 4.92E-01 | 0.07  | 7.36E-01 |
| RP11-549L6.3   | 0.16  | 4.20E-01 | 0.07  | 7.36E-01 |
| RPS26P28       | 0.32  | 1.01E-01 | 0.07  | 7.36E-01 |
| SDHAF3         | -0.09 | 6.64E-01 | 0.07  | 7.36E-01 |
| SMIM2-AS1      | -0.16 | 4.27E-01 | 0.07  | 7.36E-01 |
| STK4-AS1       | -0.14 | 4.73E-01 | 0.07  | 7.36E-01 |
| AC093381.2     | -0.15 | 4.60E-01 | -0.07 | 7.37E-01 |
| CGRRF1         | -0.04 | 8.53E-01 | -0.07 | 7.37E-01 |
| HSF4           | -0.26 | 1.83E-01 | -0.07 | 7.37E-01 |
| IGFBP3         | -0.09 | 6.37E-01 | -0.07 | 7.37E-01 |
| LAMTOR5        | 0.05  | 8.16E-01 | -0.07 | 7.37E-01 |
| LINCR-0001     | -0.03 | 8.75E-01 | -0.07 | 7.37E-01 |
| MIR374A        | -0.12 | 5.54E-01 | -0.07 | 7.37E-01 |
| OXGR1          | -0.20 | 3.07E-01 | -0.07 | 7.37E-01 |
| PIEZO2         | 0.02  | 9.31E-01 | -0.07 | 7.37E-01 |
| PIN4           | -0.06 | 7.67E-01 | -0.07 | 7.37E-01 |
| RP11-132J14.3  | -0.15 | 4.46E-01 | -0.07 | 7.37E-01 |
| RP11-174G6.5   | 0.18  | 3.72E-01 | -0.07 | 7.37E-01 |
| RP11-261P13.6  | 0.17  | 3.82E-01 | -0.07 | 7.37E-01 |
| RP11-302K17.3  | -0.22 | 2.65E-01 | -0.07 | 7.37E-01 |
| RP11-338K17.10 | -0.02 | 9.06E-01 | -0.07 | 7.37E-01 |
| RP11-401F2.4   | 0.18  | 3.49E-01 | -0.07 | 7.37E-01 |
| RP11-439A17.9  | -0.03 | 8.81E-01 | -0.07 | 7.37E-01 |
| RP3-510D11.4   | -0.05 | 7.91E-01 | -0.07 | 7.37E-01 |
| RP5-1050D4.2   | -0.41 | 3.23E-02 | -0.07 | 7.37E-01 |
| SNORA48        | -0.30 | 1.21E-01 | -0.07 | 7.37E-01 |
| BIVM           | 0.11  | 5.94E-01 | 0.07  | 7.37E-01 |
| C20orf27       | 0.10  | 6.10E-01 | 0.07  | 7.37E-01 |
| CARD10         | 0.28  | 1.51E-01 | 0.07  | 7.37E-01 |
| CDX1           | 0.10  | 6.11E-01 | 0.07  | 7.37E-01 |
| CNBP           | 0.21  | 2.88E-01 | 0.07  | 7.37E-01 |
| FLII           | -0.08 | 6.75E-01 | 0.07  | 7.37E-01 |
| GS1-115G20.1   | -0.09 | 6.56E-01 | 0.07  | 7.37E-01 |
| KLHL21         | 0.14  | 4.83E-01 | 0.07  | 7.37E-01 |
| NEMF           | -0.23 | 2.45E-01 | 0.07  | 7.37E-01 |

|               |       |          |       |          |
|---------------|-------|----------|-------|----------|
| PCNX          | 0.07  | 7.21E-01 | 0.07  | 7.37E-01 |
| PDHB          | 0.02  | 9.05E-01 | 0.07  | 7.37E-01 |
| PLPP3         | -0.15 | 4.53E-01 | 0.07  | 7.37E-01 |
| RBM47         | 0.16  | 4.19E-01 | 0.07  | 7.37E-01 |
| RPSAP13       | -0.17 | 3.91E-01 | 0.07  | 7.37E-01 |
| TIFA          | 0.08  | 6.85E-01 | 0.07  | 7.37E-01 |
| TMEM147       | 0.00  | 9.85E-01 | 0.07  | 7.37E-01 |
| WDR83OS       | 0.10  | 6.09E-01 | 0.07  | 7.37E-01 |
| ZNF804A       | -0.01 | 9.61E-01 | 0.07  | 7.37E-01 |
| AC141586.5    | -0.13 | 5.10E-01 | -0.07 | 7.38E-01 |
| CD79A         | 0.30  | 1.22E-01 | 0.07  | 7.38E-01 |
| CTC-503J8.4   | -0.05 | 8.01E-01 | -0.07 | 7.38E-01 |
| DAZAP1        | 0.43  | 2.21E-02 | -0.07 | 7.38E-01 |
| DZANK1        | -0.36 | 6.11E-02 | -0.07 | 7.38E-01 |
| EIF4E2P1      | -0.19 | 3.25E-01 | -0.07 | 7.38E-01 |
| FOXM1         | 0.14  | 4.77E-01 | 0.07  | 7.38E-01 |
| FUNDC2        | 0.10  | 6.17E-01 | -0.07 | 7.38E-01 |
| G14548        | -0.03 | 8.90E-01 | -0.07 | 7.38E-01 |
| G18316        | -0.05 | 7.96E-01 | 0.07  | 7.38E-01 |
| GULOP         | -0.13 | 4.93E-01 | -0.07 | 7.38E-01 |
| KIAA1841      | -0.26 | 1.73E-01 | -0.07 | 7.38E-01 |
| KIFC2         | -0.11 | 5.70E-01 | -0.07 | 7.38E-01 |
| LINC01054     | 0.06  | 7.66E-01 | -0.07 | 7.38E-01 |
| MTPN          | 0.27  | 1.66E-01 | 0.07  | 7.38E-01 |
| NDUFB9        | 0.16  | 4.22E-01 | -0.07 | 7.38E-01 |
| NOL8P1        | 0.11  | 5.69E-01 | 0.07  | 7.38E-01 |
| PCNAP4        | 0.15  | 4.61E-01 | -0.07 | 7.38E-01 |
| PIGHP1        | -0.10 | 6.02E-01 | -0.07 | 7.38E-01 |
| PRB4          | -0.21 | 2.93E-01 | 0.07  | 7.38E-01 |
| RAB8B         | 0.14  | 4.77E-01 | -0.07 | 7.38E-01 |
| RN7SL55P      | -0.18 | 3.54E-01 | -0.07 | 7.38E-01 |
| RP1-85F18.6   | 0.24  | 2.15E-01 | -0.07 | 7.38E-01 |
| RP11-134K13.4 | -0.17 | 3.76E-01 | -0.07 | 7.38E-01 |
| RP11-231I16.1 | -0.21 | 2.87E-01 | -0.07 | 7.38E-01 |
| RP11-252I14.2 | -0.19 | 3.27E-01 | -0.07 | 7.38E-01 |
| RP11-434H14.1 | -0.38 | 4.54E-02 | -0.07 | 7.38E-01 |
| RP11-529K1.2  | -0.12 | 5.30E-01 | 0.07  | 7.38E-01 |
| RP11-554D20.1 | 0.12  | 5.37E-01 | -0.07 | 7.38E-01 |
| RUNDC1        | 0.09  | 6.62E-01 | 0.07  | 7.38E-01 |
| SDHAP1        | -0.13 | 5.14E-01 | -0.07 | 7.38E-01 |
| SLC25A51      | 0.13  | 4.97E-01 | 0.07  | 7.38E-01 |
| SMAD5-AS1     | -0.09 | 6.49E-01 | -0.07 | 7.38E-01 |
| TCF3P1        | -0.22 | 2.61E-01 | -0.07 | 7.38E-01 |
| TPBGL         | -0.36 | 5.96E-02 | 0.07  | 7.38E-01 |
| ZNF845        | -0.15 | 4.41E-01 | 0.07  | 7.38E-01 |
| AL023583.1    | 0.23  | 2.45E-01 | -0.07 | 7.39E-01 |
| APOO          | 0.22  | 2.54E-01 | 0.07  | 7.39E-01 |

|               |       |          |       |          |
|---------------|-------|----------|-------|----------|
| ATP6V0E1      | 0.12  | 5.50E-01 | 0.07  | 7.39E-01 |
| CACNA1H       | -0.10 | 6.19E-01 | 0.07  | 7.39E-01 |
| CAPN12        | 0.10  | 6.27E-01 | -0.07 | 7.39E-01 |
| CD79B         | 0.00  | 9.92E-01 | -0.07 | 7.39E-01 |
| CFAP221       | 0.16  | 4.30E-01 | -0.07 | 7.39E-01 |
| EYA3          | 0.05  | 8.00E-01 | 0.07  | 7.39E-01 |
| FAM91A1       | 0.24  | 2.18E-01 | -0.07 | 7.39E-01 |
| G34509        | -0.17 | 3.86E-01 | -0.07 | 7.39E-01 |
| JDP2          | -0.12 | 5.33E-01 | 0.07  | 7.39E-01 |
| LINC01422     | -0.12 | 5.27E-01 | -0.07 | 7.39E-01 |
| MAD2L1BP      | 0.07  | 7.35E-01 | 0.07  | 7.39E-01 |
| MTHFD1L       | -0.04 | 8.48E-01 | -0.07 | 7.39E-01 |
| RINT1         | 0.18  | 3.66E-01 | -0.07 | 7.39E-01 |
| RNU6-101P     | -0.50 | 7.00E-03 | 0.07  | 7.39E-01 |
| RP11-157H4.1  | 0.10  | 6.26E-01 | 0.07  | 7.39E-01 |
| RP11-17A4.2   | -0.15 | 4.41E-01 | -0.07 | 7.39E-01 |
| RP11-20I23.2  | 0.33  | 8.59E-02 | 0.07  | 7.39E-01 |
| RP11-399E6.4  | 0.17  | 3.74E-01 | 0.07  | 7.39E-01 |
| RP11-426J5.3  | -0.07 | 7.19E-01 | -0.07 | 7.39E-01 |
| RP11-475C16.1 | 0.01  | 9.40E-01 | 0.07  | 7.39E-01 |
| RP11-92K15.1  | -0.13 | 5.05E-01 | 0.07  | 7.39E-01 |
| RP13-554M15.7 | -0.07 | 7.06E-01 | -0.07 | 7.39E-01 |
| RP4-802A10.1  | 0.05  | 8.14E-01 | -0.07 | 7.39E-01 |
| SMIM10L1      | 0.13  | 5.21E-01 | 0.07  | 7.39E-01 |
| SSNA1         | 0.16  | 4.02E-01 | 0.07  | 7.39E-01 |
| TNNC2         | 0.06  | 7.63E-01 | -0.07 | 7.39E-01 |
| WBSCR16       | 0.14  | 4.73E-01 | 0.07  | 7.39E-01 |
| AC003101.1    | 0.05  | 7.89E-01 | 0.07  | 7.40E-01 |
| AC017048.1    | -0.09 | 6.44E-01 | -0.07 | 7.40E-01 |
| AL033378.1    | -0.20 | 3.17E-01 | 0.07  | 7.40E-01 |
| ALG8          | 0.01  | 9.56E-01 | 0.07  | 7.40E-01 |
| BCL11A        | 0.07  | 7.37E-01 | -0.07 | 7.40E-01 |
| BNIP3P25      | -0.16 | 4.12E-01 | -0.07 | 7.40E-01 |
| CADPS2        | -0.42 | 2.80E-02 | -0.07 | 7.40E-01 |
| CLEC5A        | 0.28  | 1.48E-01 | 0.07  | 7.40E-01 |
| CTC-490E21.11 | -0.12 | 5.50E-01 | -0.07 | 7.40E-01 |
| EHD2          | -0.16 | 4.02E-01 | 0.07  | 7.40E-01 |
| FRS2          | -0.09 | 6.33E-01 | -0.07 | 7.40E-01 |
| G17702        | 0.04  | 8.44E-01 | 0.07  | 7.40E-01 |
| GAPDHP23      | -0.07 | 7.32E-01 | 0.07  | 7.40E-01 |
| GOLGA7        | -0.02 | 9.27E-01 | -0.07 | 7.40E-01 |
| HNRNPA1P76    | 0.00  | 1.00E+00 | -0.07 | 7.40E-01 |
| MCHR1         | -0.08 | 7.02E-01 | 0.07  | 7.40E-01 |
| MIR4513       | 0.25  | 2.06E-01 | 0.07  | 7.40E-01 |
| MIR5009       | -0.40 | 3.44E-02 | 0.07  | 7.40E-01 |
| PPIAP19       | -0.15 | 4.57E-01 | -0.07 | 7.40E-01 |
| PSMC3         | 0.04  | 8.43E-01 | 0.07  | 7.40E-01 |

|                      |       |          |       |          |
|----------------------|-------|----------|-------|----------|
| <b>RBMS3-AS3</b>     | -0.35 | 6.64E-02 | -0.07 | 7.40E-01 |
| <b>RBPMSLP</b>       | 0.29  | 1.35E-01 | 0.07  | 7.40E-01 |
| <b>RCE1</b>          | 0.18  | 3.50E-01 | 0.07  | 7.40E-01 |
| <b>RP11-146F11.5</b> | 0.31  | 1.13E-01 | -0.07 | 7.40E-01 |
| <b>RP11-258F1.2</b>  | -0.03 | 8.64E-01 | 0.07  | 7.40E-01 |
| <b>RP11-39M21.1</b>  | -0.25 | 2.04E-01 | -0.07 | 7.40E-01 |
| <b>RP11-452J21.2</b> | -0.21 | 2.75E-01 | -0.07 | 7.40E-01 |
| <b>RP11-574K11.5</b> | -0.16 | 4.15E-01 | 0.07  | 7.40E-01 |
| <b>RP11-627K11.1</b> | 0.08  | 6.87E-01 | -0.07 | 7.40E-01 |
| <b>SGF29</b>         | -0.13 | 5.26E-01 | 0.07  | 7.40E-01 |
| <b>SMC1A</b>         | -0.22 | 2.59E-01 | -0.07 | 7.40E-01 |
| <b>TRAJ15</b>        | -0.16 | 4.16E-01 | 0.07  | 7.40E-01 |
| <b>WDR73</b>         | -0.01 | 9.72E-01 | 0.07  | 7.40E-01 |
| <b>ZNF133</b>        | 0.30  | 1.25E-01 | 0.07  | 7.40E-01 |
| <b>AC067742.1</b>    | 0.41  | 3.14E-02 | 0.07  | 7.41E-01 |
| <b>AC093162.5</b>    | -0.04 | 8.54E-01 | -0.07 | 7.41E-01 |
| <b>AP001258.5</b>    | -0.23 | 2.33E-01 | 0.07  | 7.41E-01 |
| <b>CCDC30</b>        | -0.13 | 5.14E-01 | -0.07 | 7.41E-01 |
| <b>CEP131</b>        | -0.15 | 4.34E-01 | 0.07  | 7.41E-01 |
| <b>COPS2</b>         | 0.19  | 3.21E-01 | 0.07  | 7.41E-01 |
| <b>CTC-281F24.1</b>  | -0.22 | 2.71E-01 | -0.07 | 7.41E-01 |
| <b>CTC-453G23.5</b>  | -0.11 | 5.66E-01 | -0.07 | 7.41E-01 |
| <b>CTD-2083E4.4</b>  | 0.15  | 4.54E-01 | -0.07 | 7.41E-01 |
| <b>CTD-2649C14.2</b> | -0.04 | 8.28E-01 | -0.07 | 7.41E-01 |
| <b>DNAJC18</b>       | 0.22  | 2.59E-01 | -0.07 | 7.41E-01 |
| <b>GPN3</b>          | -0.09 | 6.62E-01 | -0.07 | 7.41E-01 |
| <b>KCNS3</b>         | -0.01 | 9.78E-01 | 0.07  | 7.41E-01 |
| <b>METRNL</b>        | 0.06  | 7.59E-01 | 0.07  | 7.41E-01 |
| <b>MRM1</b>          | 0.23  | 2.34E-01 | 0.07  | 7.41E-01 |
| <b>PFN1P3</b>        | 0.07  | 7.18E-01 | -0.07 | 7.41E-01 |
| <b>POLR2M</b>        | 0.20  | 3.17E-01 | -0.07 | 7.41E-01 |
| <b>PSMA2</b>         | 0.11  | 5.72E-01 | -0.07 | 7.41E-01 |
| <b>PSMG3</b>         | -0.01 | 9.79E-01 | -0.07 | 7.41E-01 |
| <b>RP11-420K14.1</b> | 0.20  | 3.19E-01 | -0.07 | 7.41E-01 |
| <b>RP11-466A19.1</b> | 0.03  | 8.89E-01 | -0.07 | 7.41E-01 |
| <b>RP11-572M11.4</b> | 0.25  | 2.05E-01 | -0.07 | 7.41E-01 |
| <b>RP11-697E2.9</b>  | 0.00  | 9.91E-01 | -0.07 | 7.41E-01 |
| <b>RPL39P3</b>       | -0.12 | 5.28E-01 | 0.07  | 7.41E-01 |
| <b>SLC25A37</b>      | 0.38  | 4.37E-02 | 0.07  | 7.41E-01 |
| <b>SLC7A9</b>        | -0.17 | 3.76E-01 | -0.07 | 7.41E-01 |
| <b>SPTBN2</b>        | -0.13 | 4.94E-01 | -0.07 | 7.41E-01 |
| <b>STX12</b>         | 0.04  | 8.58E-01 | 0.07  | 7.41E-01 |
| <b>TAGLN2</b>        | -0.03 | 8.68E-01 | 0.07  | 7.41E-01 |
| <b>TMA16P2</b>       | -0.17 | 3.73E-01 | 0.07  | 7.41E-01 |
| <b>TNKS1BP1</b>      | 0.01  | 9.42E-01 | -0.07 | 7.41E-01 |
| <b>UBE2FP1</b>       | -0.08 | 6.90E-01 | -0.07 | 7.41E-01 |
| <b>VPS50</b>         | 0.05  | 7.89E-01 | -0.07 | 7.41E-01 |



|                      |       |          |       |          |
|----------------------|-------|----------|-------|----------|
| <b>XLOC_000986</b>   | 0.22  | 2.61E-01 | 0.07  | 7.41E-01 |
| <b>AC019097.7</b>    | -0.03 | 8.70E-01 | -0.07 | 7.43E-01 |
| <b>AC073326.3</b>    | -0.35 | 7.12E-02 | 0.07  | 7.43E-01 |
| <b>AF064858.6</b>    | 0.14  | 4.89E-01 | -0.07 | 7.43E-01 |
| <b>AK4</b>           | 0.25  | 1.93E-01 | -0.07 | 7.43E-01 |
| <b>CAPN11</b>        | -0.07 | 7.31E-01 | 0.07  | 7.43E-01 |
| <b>CYP2T3P</b>       | 0.37  | 5.42E-02 | -0.07 | 7.43E-01 |
| <b>DACT3-AS1</b>     | -0.06 | 7.62E-01 | 0.07  | 7.43E-01 |
| <b>DDX49</b>         | 0.00  | 9.86E-01 | -0.07 | 7.43E-01 |
| <b>EPB41L5</b>       | -0.03 | 8.89E-01 | -0.07 | 7.43E-01 |
| <b>FKBP3</b>         | -0.09 | 6.48E-01 | 0.07  | 7.43E-01 |
| <b>G18874</b>        | -0.07 | 7.31E-01 | -0.07 | 7.43E-01 |
| <b>GCNT6</b>         | -0.21 | 2.94E-01 | -0.07 | 7.43E-01 |
| <b>LDLRAD4</b>       | -0.17 | 3.93E-01 | -0.07 | 7.43E-01 |
| <b>LINC01118</b>     | -0.34 | 8.13E-02 | 0.07  | 7.43E-01 |
| <b>MAPK6PS3</b>      | 0.04  | 8.30E-01 | 0.07  | 7.43E-01 |
| <b>MIR326</b>        | 0.05  | 8.13E-01 | 0.07  | 7.43E-01 |
| <b>MIR661</b>        | 0.31  | 1.10E-01 | 0.07  | 7.43E-01 |
| <b>NUP88</b>         | 0.07  | 7.32E-01 | -0.07 | 7.43E-01 |
| <b>RN7SKP292</b>     | -0.14 | 4.85E-01 | -0.07 | 7.43E-01 |
| <b>RND2</b>          | -0.11 | 5.72E-01 | 0.07  | 7.43E-01 |
| <b>RP11-120K24.4</b> | -0.14 | 4.82E-01 | -0.07 | 7.43E-01 |
| <b>RP11-211A18.2</b> | -0.03 | 8.82E-01 | 0.07  | 7.43E-01 |
| <b>RP11-219E7.4</b>  | 0.11  | 5.88E-01 | -0.07 | 7.43E-01 |
| <b>RP11-326K13.5</b> | 0.32  | 9.15E-02 | 0.07  | 7.43E-01 |
| <b>RP11-434H6.7</b>  | -0.06 | 7.48E-01 | 0.07  | 7.43E-01 |
| <b>RP11-564D11.3</b> | 0.03  | 8.92E-01 | -0.07 | 7.43E-01 |
| <b>RP11-671E7.1</b>  | 0.04  | 8.48E-01 | 0.07  | 7.43E-01 |
| <b>RP11-770E5.1</b>  | 0.18  | 3.60E-01 | -0.07 | 7.43E-01 |
| <b>RP11-778D9.12</b> | 0.14  | 4.70E-01 | -0.07 | 7.43E-01 |
| <b>RP11-881I8.2</b>  | -0.18 | 3.59E-01 | -0.07 | 7.43E-01 |
| <b>RP4-646N3.1</b>   | 0.06  | 7.75E-01 | -0.07 | 7.43E-01 |
| <b>RPL13</b>         | 0.17  | 3.78E-01 | -0.07 | 7.43E-01 |
| <b>SLC30A2</b>       | -0.17 | 3.83E-01 | 0.07  | 7.43E-01 |
| <b>ST7L</b>          | 0.02  | 9.04E-01 | -0.07 | 7.43E-01 |
| <b>STOM</b>          | 0.08  | 6.97E-01 | -0.07 | 7.43E-01 |
| <b>TCTN3</b>         | 0.24  | 2.22E-01 | 0.07  | 7.43E-01 |
| <b>XLOC_008971</b>   | -0.08 | 6.84E-01 | -0.07 | 7.43E-01 |
| <b>XLOC_011798</b>   | -0.01 | 9.50E-01 | -0.07 | 7.43E-01 |
| <b>ZNF649-AS1</b>    | -0.01 | 9.57E-01 | -0.07 | 7.43E-01 |
| <b>bP-218909.3</b>   | 0.03  | 8.93E-01 | 0.07  | 7.43E-01 |
| <b>AASDHPPT</b>      | 0.36  | 5.62E-02 | 0.07  | 7.44E-01 |
| <b>AC006272.1</b>    | -0.21 | 2.93E-01 | 0.07  | 7.44E-01 |
| <b>CACNA1C-AS1</b>   | 0.15  | 4.54E-01 | 0.07  | 7.44E-01 |
| <b>CCDC114</b>       | -0.26 | 1.90E-01 | 0.07  | 7.44E-01 |
| <b>COX5B</b>         | 0.08  | 6.83E-01 | 0.07  | 7.44E-01 |
| <b>EMC4</b>          | 0.13  | 5.20E-01 | 0.07  | 7.44E-01 |

|                      |       |          |       |          |
|----------------------|-------|----------|-------|----------|
| <b>EPS8L2</b>        | -0.04 | 8.29E-01 | 0.07  | 7.44E-01 |
| <b>G1863</b>         | -0.04 | 8.31E-01 | 0.07  | 7.44E-01 |
| <b>GLRX3</b>         | 0.08  | 6.85E-01 | 0.07  | 7.44E-01 |
| <b>NOTCH4</b>        | -0.08 | 6.68E-01 | 0.07  | 7.44E-01 |
| <b>OR10AD1</b>       | -0.02 | 9.22E-01 | 0.07  | 7.44E-01 |
| <b>POLR3C</b>        | 0.18  | 3.66E-01 | 0.07  | 7.44E-01 |
| <b>PRSS35</b>        | 0.03  | 8.87E-01 | 0.07  | 7.44E-01 |
| <b>RALBP1</b>        | -0.02 | 9.10E-01 | 0.07  | 7.44E-01 |
| <b>REC114</b>        | -0.21 | 2.80E-01 | 0.07  | 7.44E-01 |
| <b>RNU7-13P</b>      | -0.02 | 9.11E-01 | 0.07  | 7.44E-01 |
| <b>RP11-165M1.1</b>  | -0.09 | 6.64E-01 | 0.07  | 7.44E-01 |
| <b>RP13-635I23.3</b> | -0.24 | 2.24E-01 | 0.07  | 7.44E-01 |
| <b>RP3-461P17.10</b> | 0.05  | 7.87E-01 | 0.07  | 7.44E-01 |
| <b>RP4-597J3.1</b>   | -0.33 | 8.92E-02 | 0.07  | 7.44E-01 |
| <b>RP4-657E11.10</b> | -0.29 | 1.40E-01 | 0.07  | 7.44E-01 |
| <b>SIX2</b>          | -0.27 | 1.67E-01 | 0.07  | 7.44E-01 |
| <b>SLC25A12</b>      | 0.31  | 1.12E-01 | 0.07  | 7.44E-01 |
| <b>SLC25A30</b>      | 0.17  | 3.96E-01 | 0.07  | 7.44E-01 |
| <b>AC005757.6</b>    | -0.26 | 1.74E-01 | -0.07 | 7.44E-01 |
| <b>AC009120.5</b>    | -0.07 | 7.36E-01 | -0.07 | 7.44E-01 |
| <b>AC100830.3</b>    | -0.50 | 6.54E-03 | -0.07 | 7.44E-01 |
| <b>ACTL7A</b>        | 0.13  | 4.99E-01 | -0.07 | 7.44E-01 |
| <b>CTD-2323K18.2</b> | 0.16  | 4.29E-01 | -0.07 | 7.44E-01 |
| <b>CUL7</b>          | -0.04 | 8.25E-01 | -0.07 | 7.44E-01 |
| <b>ITCH-IT1</b>      | -0.27 | 1.70E-01 | -0.07 | 7.44E-01 |
| <b>NUDT13</b>        | 0.10  | 6.14E-01 | -0.07 | 7.44E-01 |
| <b>PVRIG</b>         | 0.19  | 3.44E-01 | -0.07 | 7.44E-01 |
| <b>RP1-68D18.2</b>   | -0.19 | 3.39E-01 | -0.07 | 7.44E-01 |
| <b>RP11-114M1.2</b>  | -0.29 | 1.28E-01 | -0.07 | 7.44E-01 |
| <b>RP11-438N5.2</b>  | 0.04  | 8.29E-01 | -0.07 | 7.44E-01 |
| <b>RP11-46O21.2</b>  | 0.03  | 8.61E-01 | -0.07 | 7.44E-01 |
| <b>RP11-642D21.2</b> | 0.02  | 9.06E-01 | -0.07 | 7.44E-01 |
| <b>VIMP</b>          | -0.07 | 7.21E-01 | -0.07 | 7.44E-01 |
| <b>ABHD3</b>         | 0.09  | 6.40E-01 | 0.07  | 7.45E-01 |
| <b>AC004593.3</b>    | 0.03  | 8.98E-01 | 0.07  | 7.45E-01 |
| <b>AC009487.6</b>    | 0.20  | 3.09E-01 | -0.07 | 7.45E-01 |
| <b>AC104113.3</b>    | 0.23  | 2.41E-01 | 0.07  | 7.45E-01 |
| <b>ARHGAP28</b>      | 0.26  | 1.75E-01 | -0.07 | 7.45E-01 |
| <b>CCDC82</b>        | 0.01  | 9.50E-01 | -0.07 | 7.45E-01 |
| <b>CELSR3</b>        | 0.01  | 9.57E-01 | -0.07 | 7.45E-01 |
| <b>CNTN4-AS2</b>     | 0.02  | 9.12E-01 | -0.07 | 7.45E-01 |
| <b>CTTN</b>          | 0.14  | 4.79E-01 | 0.07  | 7.45E-01 |
| <b>DYNC1LI1</b>      | 0.07  | 7.26E-01 | 0.07  | 7.45E-01 |
| <b>EIF3D</b>         | 0.17  | 4.00E-01 | 0.07  | 7.45E-01 |
| <b>FAM212A</b>       | 0.05  | 7.97E-01 | 0.07  | 7.45E-01 |
| <b>GOS2</b>          | 0.00  | 9.85E-01 | 0.07  | 7.45E-01 |
| <b>G34668</b>        | -0.24 | 2.18E-01 | 0.07  | 7.45E-01 |

|               |       |          |       |          |
|---------------|-------|----------|-------|----------|
| G36510        | -0.01 | 9.47E-01 | -0.07 | 7.45E-01 |
| KRT18P60      | -0.13 | 5.13E-01 | -0.07 | 7.45E-01 |
| NOX5          | 0.10  | 6.08E-01 | -0.07 | 7.45E-01 |
| PFKP          | 0.20  | 3.07E-01 | 0.07  | 7.45E-01 |
| RAB22A        | 0.07  | 7.38E-01 | -0.07 | 7.45E-01 |
| RN7SL47P      | -0.06 | 7.80E-01 | 0.07  | 7.45E-01 |
| RP11-29B2.6   | -0.14 | 4.86E-01 | -0.07 | 7.45E-01 |
| RP11-449J21.3 | 0.27  | 1.57E-01 | -0.07 | 7.45E-01 |
| RP11-53I6.1   | -0.22 | 2.65E-01 | -0.07 | 7.45E-01 |
| RP11-797D24.3 | 0.05  | 7.93E-01 | 0.07  | 7.45E-01 |
| RP13-714J12.1 | -0.03 | 8.77E-01 | -0.07 | 7.45E-01 |
| RP4-555D20.2  | -0.13 | 4.96E-01 | -0.07 | 7.45E-01 |
| RP4-777O23.2  | -0.20 | 3.20E-01 | -0.07 | 7.45E-01 |
| RPS29         | 0.33  | 8.53E-02 | 0.07  | 7.45E-01 |
| SIGLEC15      | 0.11  | 5.92E-01 | 0.07  | 7.45E-01 |
| SLC20A1       | 0.14  | 4.86E-01 | -0.07 | 7.45E-01 |
| SLC38A6       | -0.19 | 3.31E-01 | 0.07  | 7.45E-01 |
| SLPI          | 0.16  | 4.24E-01 | 0.07  | 7.45E-01 |
| SMAD5         | 0.26  | 1.90E-01 | 0.07  | 7.45E-01 |
| TMEM81        | -0.13 | 5.15E-01 | -0.07 | 7.45E-01 |
| TSSC2         | 0.08  | 6.88E-01 | -0.07 | 7.45E-01 |
| UQCRFS1       | 0.09  | 6.47E-01 | -0.07 | 7.45E-01 |
| AC005086.1    | 0.16  | 4.06E-01 | -0.07 | 7.46E-01 |
| AC006111.1    | 0.25  | 2.04E-01 | -0.07 | 7.46E-01 |
| AC010327.1    | -0.05 | 8.19E-01 | -0.07 | 7.46E-01 |
| AC015849.13   | 0.06  | 7.58E-01 | 0.07  | 7.46E-01 |
| AC131097.4    | 0.19  | 3.20E-01 | -0.07 | 7.46E-01 |
| ARMCX4        | -0.29 | 1.32E-01 | -0.07 | 7.46E-01 |
| CHRD          | -0.27 | 1.57E-01 | 0.07  | 7.46E-01 |
| CTA-126B4.7   | -0.07 | 7.21E-01 | 0.07  | 7.46E-01 |
| CTD-2313J17.5 | 0.17  | 3.82E-01 | -0.07 | 7.46E-01 |
| ENDOG         | 0.13  | 5.21E-01 | 0.07  | 7.46E-01 |
| ERCC3         | -0.08 | 6.94E-01 | 0.07  | 7.46E-01 |
| G24514        | 0.36  | 5.96E-02 | 0.07  | 7.46E-01 |
| G39214        | 0.19  | 3.39E-01 | -0.07 | 7.46E-01 |
| KB-1742H10.3  | -0.03 | 8.91E-01 | 0.07  | 7.46E-01 |
| KRBOX4        | 0.40  | 3.41E-02 | 0.07  | 7.46E-01 |
| KRTAP12-1     | -0.09 | 6.34E-01 | 0.07  | 7.46E-01 |
| NDUFB2        | 0.04  | 8.40E-01 | 0.07  | 7.46E-01 |
| NEGR1         | -0.04 | 8.40E-01 | -0.07 | 7.46E-01 |
| OAT           | 0.19  | 3.22E-01 | -0.07 | 7.46E-01 |
| RAE1          | 0.14  | 4.75E-01 | -0.07 | 7.46E-01 |
| RNA5SP88      | 0.08  | 6.79E-01 | -0.07 | 7.46E-01 |
| RNU6-853P     | 0.01  | 9.68E-01 | -0.07 | 7.46E-01 |
| RP11-237N19.3 | -0.10 | 6.19E-01 | 0.07  | 7.46E-01 |
| RP11-286B14.2 | -0.14 | 4.92E-01 | 0.07  | 7.46E-01 |
| RP11-288I21.1 | -0.38 | 4.78E-02 | 0.07  | 7.46E-01 |

|                      |       |          |       |          |
|----------------------|-------|----------|-------|----------|
| <b>RP11-395P16.1</b> | 0.01  | 9.44E-01 | 0.07  | 7.46E-01 |
| <b>RP11-415J8.3</b>  | 0.22  | 2.58E-01 | -0.07 | 7.46E-01 |
| <b>RP11-711K1.7</b>  | -0.01 | 9.40E-01 | 0.07  | 7.46E-01 |
| <b>RP11-95D17.1</b>  | 0.34  | 7.27E-02 | -0.07 | 7.46E-01 |
| <b>RP11-98D18.3</b>  | -0.03 | 8.82E-01 | 0.07  | 7.46E-01 |
| <b>SHE</b>           | -0.27 | 1.62E-01 | -0.07 | 7.46E-01 |
| <b>SKAP2</b>         | -0.01 | 9.79E-01 | 0.07  | 7.46E-01 |
| <b>SNORD89</b>       | -0.13 | 4.99E-01 | 0.07  | 7.46E-01 |
| <b>TACR3</b>         | -0.19 | 3.29E-01 | -0.07 | 7.46E-01 |
| <b>THBS3</b>         | -0.18 | 3.54E-01 | 0.07  | 7.46E-01 |
| <b>TRAJ5</b>         | -0.07 | 7.17E-01 | 0.07  | 7.46E-01 |
| <b>TRBV2</b>         | 0.15  | 4.55E-01 | 0.07  | 7.46E-01 |
| <b>bp-21264C1.2</b>  | 0.05  | 7.87E-01 | -0.07 | 7.46E-01 |
| <b>AC009994.2</b>    | -0.22 | 2.69E-01 | 0.07  | 7.47E-01 |
| <b>AKR1B1</b>        | 0.31  | 1.11E-01 | 0.07  | 7.47E-01 |
| <b>ANKRD13B</b>      | 0.07  | 7.12E-01 | 0.07  | 7.47E-01 |
| <b>BUB1B</b>         | 0.12  | 5.39E-01 | 0.07  | 7.47E-01 |
| <b>C12orf65</b>      | 0.23  | 2.38E-01 | 0.07  | 7.47E-01 |
| <b>CATSPER1</b>      | -0.05 | 8.10E-01 | 0.07  | 7.47E-01 |
| <b>GS1-259H13.7</b>  | -0.10 | 6.07E-01 | 0.07  | 7.47E-01 |
| <b>HOXC-AS2</b>      | 0.13  | 5.21E-01 | 0.07  | 7.47E-01 |
| <b>ISG20</b>         | 0.30  | 1.21E-01 | 0.07  | 7.47E-01 |
| <b>MAD2L1</b>        | 0.13  | 5.20E-01 | 0.07  | 7.47E-01 |
| <b>PILRA</b>         | 0.14  | 4.65E-01 | 0.07  | 7.47E-01 |
| <b>POLR2H</b>        | 0.16  | 4.13E-01 | 0.07  | 7.47E-01 |
| <b>PRSS23</b>        | 0.09  | 6.58E-01 | 0.07  | 7.47E-01 |
| <b>RP11-184A2.3</b>  | 0.13  | 5.03E-01 | 0.07  | 7.47E-01 |
| <b>RP11-679C8.2</b>  | -0.19 | 3.39E-01 | 0.07  | 7.47E-01 |
| <b>RPL12P38</b>      | 0.01  | 9.57E-01 | 0.07  | 7.47E-01 |
| <b>SF1</b>           | 0.09  | 6.59E-01 | 0.07  | 7.47E-01 |
| <b>ST8SIA2</b>       | -0.02 | 9.16E-01 | 0.07  | 7.47E-01 |
| <b>TMED7-TICAM2</b>  | -0.08 | 6.83E-01 | 0.07  | 7.47E-01 |
| <b>VAR5</b>          | 0.19  | 3.20E-01 | 0.07  | 7.47E-01 |
| <b>WI2-8325B5.1</b>  | -0.01 | 9.69E-01 | 0.07  | 7.47E-01 |
| <b>XLOC_002925</b>   | -0.12 | 5.29E-01 | 0.07  | 7.47E-01 |
| <b>ZFP14</b>         | -0.09 | 6.56E-01 | 0.07  | 7.47E-01 |
| <b>ZSCAN30</b>       | 0.05  | 7.94E-01 | 0.07  | 7.47E-01 |
| <b>BNIP3P38</b>      | 0.15  | 4.54E-01 | -0.07 | 7.47E-01 |
| <b>CTB-75G16.1</b>   | -0.14 | 4.73E-01 | -0.07 | 7.47E-01 |
| <b>CYP1B1-AS1</b>    | -0.11 | 5.84E-01 | -0.07 | 7.47E-01 |
| <b>DBR1</b>          | 0.02  | 9.08E-01 | -0.07 | 7.47E-01 |
| <b>GPR143</b>        | -0.12 | 5.30E-01 | -0.07 | 7.47E-01 |
| <b>HYDIN</b>         | -0.09 | 6.50E-01 | -0.07 | 7.47E-01 |
| <b>LYRM1</b>         | -0.01 | 9.69E-01 | -0.07 | 7.47E-01 |
| <b>MIR1255A</b>      | -0.32 | 9.81E-02 | -0.07 | 7.47E-01 |
| <b>MORC4</b>         | -0.03 | 8.63E-01 | -0.07 | 7.47E-01 |
| <b>NDUFAF2</b>       | 0.10  | 6.09E-01 | -0.07 | 7.47E-01 |

|               |       |          |       |          |
|---------------|-------|----------|-------|----------|
| RP1-199J3.5   | -0.25 | 2.09E-01 | -0.07 | 7.47E-01 |
| RP11-481G8.2  | 0.01  | 9.65E-01 | -0.07 | 7.47E-01 |
| RP11-876N24.5 | 0.23  | 2.45E-01 | -0.07 | 7.47E-01 |
| RP4-785G19.2  | 0.21  | 2.95E-01 | -0.07 | 7.47E-01 |
| RP5-903E17.2  | 0.05  | 8.08E-01 | -0.07 | 7.47E-01 |
| SLF2          | 0.03  | 8.62E-01 | -0.07 | 7.47E-01 |
| UQCRB         | 0.19  | 3.32E-01 | -0.07 | 7.47E-01 |
| AC017083.1    | -0.17 | 3.78E-01 | 0.06  | 7.48E-01 |
| AC068657.2    | -0.14 | 4.86E-01 | -0.06 | 7.48E-01 |
| AC114812.9    | -0.01 | 9.77E-01 | -0.06 | 7.48E-01 |
| C3            | -0.19 | 3.27E-01 | 0.06  | 7.48E-01 |
| CAMSAP2       | 0.30  | 1.24E-01 | -0.06 | 7.48E-01 |
| CTD-237103.2  | 0.22  | 2.58E-01 | 0.06  | 7.48E-01 |
| CYB5R2        | 0.38  | 4.52E-02 | -0.06 | 7.48E-01 |
| GAPDHP49      | -0.08 | 6.99E-01 | 0.06  | 7.48E-01 |
| GYPC          | -0.14 | 4.80E-01 | -0.06 | 7.48E-01 |
| HNRNPUL1      | 0.08  | 6.86E-01 | 0.06  | 7.48E-01 |
| HRAS          | 0.17  | 3.89E-01 | 0.06  | 7.48E-01 |
| IL7R          | 0.29  | 1.36E-01 | 0.06  | 7.48E-01 |
| ITGB3         | -0.08 | 6.83E-01 | -0.06 | 7.48E-01 |
| LATS2-AS1     | -0.05 | 7.99E-01 | 0.06  | 7.48E-01 |
| LINC00957     | 0.10  | 5.96E-01 | 0.06  | 7.48E-01 |
| LOXL1         | 0.17  | 3.86E-01 | -0.06 | 7.48E-01 |
| MRPL18        | -0.07 | 7.26E-01 | -0.06 | 7.48E-01 |
| MRPL53P1      | -0.29 | 1.34E-01 | 0.06  | 7.48E-01 |
| MTRF1LP2      | -0.35 | 6.50E-02 | 0.06  | 7.48E-01 |
| NPM1P37       | -0.17 | 3.73E-01 | 0.06  | 7.48E-01 |
| OXNAD1        | 0.03  | 8.66E-01 | 0.06  | 7.48E-01 |
| PNMA5         | 0.05  | 7.97E-01 | 0.06  | 7.48E-01 |
| PPP2R5E       | -0.02 | 9.23E-01 | 0.06  | 7.48E-01 |
| PTPRD         | 0.07  | 7.11E-01 | -0.06 | 7.48E-01 |
| PYGB          | 0.34  | 7.54E-02 | 0.06  | 7.48E-01 |
| RNF17         | -0.09 | 6.63E-01 | 0.06  | 7.48E-01 |
| RP11-262H14.3 | 0.03  | 8.78E-01 | -0.06 | 7.48E-01 |
| RP11-514F3.4  | 0.04  | 8.29E-01 | -0.06 | 7.48E-01 |
| RP11-532F6.3  | -0.21 | 2.75E-01 | -0.06 | 7.48E-01 |
| RP5-1098D14.1 | 0.04  | 8.53E-01 | -0.06 | 7.48E-01 |
| RUNDC3B       | 0.00  | 9.88E-01 | -0.06 | 7.48E-01 |
| SMCR8         | -0.08 | 6.81E-01 | 0.06  | 7.48E-01 |
| SRRT          | -0.11 | 5.78E-01 | -0.06 | 7.48E-01 |
| USP39         | -0.15 | 4.46E-01 | 0.06  | 7.48E-01 |
| VN1R1         | -0.08 | 6.94E-01 | -0.06 | 7.48E-01 |
| AC004022.7    | 0.04  | 8.23E-01 | -0.06 | 7.49E-01 |
| AC073109.2    | -0.36 | 6.01E-02 | -0.06 | 7.49E-01 |
| AL136218.1    | -0.15 | 4.60E-01 | -0.06 | 7.49E-01 |
| ALDH1A1       | 0.30  | 1.16E-01 | 0.06  | 7.49E-01 |
| CAMSAP1       | 0.17  | 3.91E-01 | 0.06  | 7.49E-01 |

|                       |       |          |       |          |
|-----------------------|-------|----------|-------|----------|
| <b>CTD-2373H9.3</b>   | -0.01 | 9.61E-01 | -0.06 | 7.49E-01 |
| <b>DDX24</b>          | 0.00  | 9.87E-01 | 0.06  | 7.49E-01 |
| <b>DNAH8</b>          | -0.32 | 9.21E-02 | 0.06  | 7.49E-01 |
| <b>FLRT2</b>          | 0.04  | 8.57E-01 | -0.06 | 7.49E-01 |
| <b>G358</b>           | -0.22 | 2.57E-01 | 0.06  | 7.49E-01 |
| <b>GATC</b>           | -0.02 | 9.27E-01 | 0.06  | 7.49E-01 |
| <b>LINC00520</b>      | -0.02 | 9.06E-01 | 0.06  | 7.49E-01 |
| <b>LRRC38</b>         | 0.23  | 2.45E-01 | 0.06  | 7.49E-01 |
| <b>MCAT</b>           | 0.28  | 1.44E-01 | -0.06 | 7.49E-01 |
| <b>MIR591</b>         | -0.35 | 7.03E-02 | 0.06  | 7.49E-01 |
| <b>NFIA-AS1</b>       | -0.21 | 2.85E-01 | -0.06 | 7.49E-01 |
| <b>OTUD4</b>          | 0.03  | 8.94E-01 | 0.06  | 7.49E-01 |
| <b>POLR2C</b>         | 0.20  | 3.07E-01 | -0.06 | 7.49E-01 |
| <b>PSRC1</b>          | 0.03  | 8.69E-01 | 0.06  | 7.49E-01 |
| <b>RAB2B</b>          | 0.17  | 3.81E-01 | 0.06  | 7.49E-01 |
| <b>RP11-139F4.2</b>   | -0.20 | 2.97E-01 | 0.06  | 7.49E-01 |
| <b>RP11-16E12.2</b>   | -0.05 | 8.17E-01 | -0.06 | 7.49E-01 |
| <b>RP11-384C4.6</b>   | 0.18  | 3.57E-01 | -0.06 | 7.49E-01 |
| <b>RP11-711G10.1</b>  | -0.25 | 2.00E-01 | -0.06 | 7.49E-01 |
| <b>RP11-834C11.11</b> | -0.05 | 7.86E-01 | -0.06 | 7.49E-01 |
| <b>RP11-89N17.1</b>   | -0.08 | 6.79E-01 | -0.06 | 7.49E-01 |
| <b>RTN4IP1</b>        | 0.07  | 7.37E-01 | 0.06  | 7.49E-01 |
| <b>SEC61B</b>         | 0.04  | 8.55E-01 | -0.06 | 7.49E-01 |
| <b>SHF</b>            | -0.15 | 4.60E-01 | -0.06 | 7.49E-01 |
| <b>SLC26A4-AS1</b>    | 0.14  | 4.86E-01 | 0.06  | 7.49E-01 |
| <b>SYT14</b>          | -0.06 | 7.63E-01 | -0.06 | 7.49E-01 |
| <b>WDYHV1</b>         | 0.00  | 9.96E-01 | 0.06  | 7.49E-01 |
| <b>ZNF280B</b>        | -0.10 | 6.20E-01 | -0.06 | 7.49E-01 |
| <b>AC004471.9</b>     | 0.05  | 7.85E-01 | 0.06  | 7.51E-01 |
| <b>AC009473.1</b>     | 0.10  | 6.12E-01 | 0.06  | 7.51E-01 |
| <b>AP006621.6</b>     | -0.01 | 9.69E-01 | 0.06  | 7.51E-01 |
| <b>CCDC80</b>         | -0.25 | 1.95E-01 | -0.06 | 7.51E-01 |
| <b>CHMP6</b>          | 0.21  | 2.88E-01 | 0.06  | 7.51E-01 |
| <b>EVC2</b>           | -0.16 | 4.28E-01 | 0.06  | 7.51E-01 |
| <b>G2591</b>          | -0.13 | 5.26E-01 | -0.06 | 7.51E-01 |
| <b>HADHB</b>          | 0.16  | 4.28E-01 | 0.06  | 7.51E-01 |
| <b>HIST2H3A</b>       | -0.13 | 5.19E-01 | -0.06 | 7.51E-01 |
| <b>HUWE1</b>          | -0.19 | 3.29E-01 | -0.06 | 7.51E-01 |
| <b>IRS1</b>           | -0.19 | 3.39E-01 | -0.06 | 7.51E-01 |
| <b>KCNG1</b>          | -0.32 | 1.02E-01 | -0.06 | 7.51E-01 |
| <b>KCNH3</b>          | -0.25 | 1.93E-01 | 0.06  | 7.51E-01 |
| <b>KLF13</b>          | 0.09  | 6.33E-01 | -0.06 | 7.51E-01 |
| <b>LINC01135</b>      | -0.07 | 7.25E-01 | -0.06 | 7.51E-01 |
| <b>MGMT</b>           | 0.06  | 7.45E-01 | 0.06  | 7.51E-01 |
| <b>MIR3939</b>        | 0.23  | 2.39E-01 | 0.06  | 7.51E-01 |
| <b>MRPL57</b>         | -0.02 | 9.38E-01 | 0.06  | 7.51E-01 |
| <b>MYL6BP1</b>        | -0.11 | 5.85E-01 | -0.06 | 7.51E-01 |

|                |       |          |       |          |
|----------------|-------|----------|-------|----------|
| NXT1           | 0.21  | 2.91E-01 | -0.06 | 7.51E-01 |
| PCAT1          | 0.41  | 3.20E-02 | 0.06  | 7.51E-01 |
| PCBP2          | -0.10 | 6.25E-01 | -0.06 | 7.51E-01 |
| PEX14          | 0.27  | 1.73E-01 | 0.06  | 7.51E-01 |
| PIGW           | 0.09  | 6.65E-01 | -0.06 | 7.51E-01 |
| RALGAPA2       | 0.10  | 6.18E-01 | 0.06  | 7.51E-01 |
| RP11-264B14.1  | -0.04 | 8.45E-01 | -0.06 | 7.51E-01 |
| RP11-290D2.3   | -0.01 | 9.58E-01 | -0.06 | 7.51E-01 |
| RP11-305O4.2   | 0.17  | 3.77E-01 | -0.06 | 7.51E-01 |
| RP11-307C12.12 | -0.32 | 1.01E-01 | -0.06 | 7.51E-01 |
| RP11-33I11.2   | -0.12 | 5.42E-01 | -0.06 | 7.51E-01 |
| RP11-351D16.3  | 0.24  | 2.14E-01 | 0.06  | 7.51E-01 |
| RP11-485M7.3   | -0.15 | 4.35E-01 | -0.06 | 7.51E-01 |
| RP11-619I22.1  | -0.20 | 3.10E-01 | 0.06  | 7.51E-01 |
| RP11-797J4.1   | -0.10 | 6.00E-01 | 0.06  | 7.51E-01 |
| RP11-848G14.5  | -0.03 | 8.61E-01 | 0.06  | 7.51E-01 |
| RPL36AL        | 0.08  | 6.92E-01 | -0.06 | 7.51E-01 |
| SLC25A15P5     | -0.19 | 3.38E-01 | -0.06 | 7.51E-01 |
| SLC30A5        | 0.11  | 5.93E-01 | -0.06 | 7.51E-01 |
| STRN4          | 0.18  | 3.47E-01 | 0.06  | 7.51E-01 |
| THAP5          | 0.14  | 4.62E-01 | -0.06 | 7.51E-01 |
| TMEM199        | 0.15  | 4.42E-01 | -0.06 | 7.51E-01 |
| TSPAN1         | -0.17 | 4.01E-01 | -0.06 | 7.51E-01 |
| TVP23CP1       | -0.37 | 5.23E-02 | 0.06  | 7.51E-01 |
| ZNF587P1       | -0.43 | 2.20E-02 | -0.06 | 7.51E-01 |
| AC018647.3     | -0.13 | 5.19E-01 | 0.06  | 7.52E-01 |
| ANKRD18B       | -0.12 | 5.54E-01 | 0.06  | 7.52E-01 |
| AQP11          | 0.09  | 6.38E-01 | 0.06  | 7.52E-01 |
| AVPI1          | -0.03 | 8.67E-01 | 0.06  | 7.52E-01 |
| CHDH           | -0.19 | 3.29E-01 | 0.06  | 7.52E-01 |
| CUL3           | 0.02  | 9.21E-01 | 0.06  | 7.52E-01 |
| EVPLL          | 0.10  | 6.04E-01 | 0.06  | 7.52E-01 |
| FMR1           | 0.06  | 7.47E-01 | -0.06 | 7.52E-01 |
| G10181         | -0.18 | 3.69E-01 | -0.06 | 7.52E-01 |
| G1997          | 0.07  | 7.22E-01 | -0.06 | 7.52E-01 |
| HINT1          | 0.17  | 3.80E-01 | -0.06 | 7.52E-01 |
| IL11           | 0.27  | 1.73E-01 | 0.06  | 7.52E-01 |
| IQCD           | -0.25 | 2.01E-01 | -0.06 | 7.52E-01 |
| LECT1          | 0.10  | 6.27E-01 | -0.06 | 7.52E-01 |
| LRP5L          | -0.50 | 6.58E-03 | -0.06 | 7.52E-01 |
| MTMR1          | 0.10  | 6.00E-01 | -0.06 | 7.52E-01 |
| MYO15A         | -0.16 | 4.07E-01 | 0.06  | 7.52E-01 |
| PRR15L         | -0.27 | 1.71E-01 | -0.06 | 7.52E-01 |
| RDH5           | -0.22 | 2.52E-01 | -0.06 | 7.52E-01 |
| RP11-110I1.5   | 0.16  | 4.10E-01 | 0.06  | 7.52E-01 |
| RP11-157F20.3  | 0.18  | 3.70E-01 | 0.06  | 7.52E-01 |
| RP11-168K11.2  | -0.04 | 8.32E-01 | 0.06  | 7.52E-01 |

|               |       |          |       |          |
|---------------|-------|----------|-------|----------|
| RP11-182I10.1 | -0.02 | 9.28E-01 | -0.06 | 7.52E-01 |
| RP11-557F20.2 | 0.04  | 8.40E-01 | -0.06 | 7.52E-01 |
| RP5-1115A15.1 | 0.07  | 7.06E-01 | 0.06  | 7.52E-01 |
| SAAL1         | 0.14  | 4.70E-01 | 0.06  | 7.52E-01 |
| ST7-OT4       | 0.13  | 5.19E-01 | -0.06 | 7.52E-01 |
| SUDS3P1       | -0.08 | 6.84E-01 | -0.06 | 7.52E-01 |
| TMEM262       | -0.12 | 5.54E-01 | -0.06 | 7.52E-01 |
| TMEM86B       | 0.12  | 5.42E-01 | -0.06 | 7.52E-01 |
| UQCRQ         | 0.17  | 3.79E-01 | 0.06  | 7.52E-01 |
| AC011524.3    | -0.47 | 1.20E-02 | 0.06  | 7.53E-01 |
| AURKB         | 0.15  | 4.34E-01 | 0.06  | 7.53E-01 |
| C19orf38      | 0.31  | 1.04E-01 | 0.06  | 7.53E-01 |
| CASC10        | 0.13  | 5.06E-01 | 0.06  | 7.53E-01 |
| CRISP3        | 0.22  | 2.61E-01 | 0.06  | 7.53E-01 |
| G16026        | -0.02 | 9.21E-01 | 0.06  | 7.53E-01 |
| KRT42P        | -0.02 | 9.15E-01 | 0.06  | 7.53E-01 |
| MARK4         | 0.24  | 2.18E-01 | 0.06  | 7.53E-01 |
| MIF4GD        | -0.02 | 9.06E-01 | 0.06  | 7.53E-01 |
| OR1J1         | 0.01  | 9.68E-01 | 0.06  | 7.53E-01 |
| PLEKHH2       | -0.30 | 1.15E-01 | 0.06  | 7.53E-01 |
| RBM43         | -0.06 | 7.77E-01 | 0.06  | 7.53E-01 |
| RP11-75C10.9  | -0.03 | 8.92E-01 | 0.06  | 7.53E-01 |
| RP3-428L16.1  | 0.14  | 4.71E-01 | 0.06  | 7.53E-01 |
| SLC6A4        | 0.07  | 7.32E-01 | 0.06  | 7.53E-01 |
| AC006116.19   | 0.31  | 1.06E-01 | -0.06 | 7.53E-01 |
| CDNF          | -0.09 | 6.43E-01 | -0.06 | 7.53E-01 |
| CHCHD4P5      | -0.09 | 6.37E-01 | -0.06 | 7.53E-01 |
| DCUN1D5       | 0.04  | 8.35E-01 | -0.06 | 7.53E-01 |
| DPY19L1       | -0.06 | 7.54E-01 | -0.06 | 7.53E-01 |
| HNRNPAB       | 0.18  | 3.71E-01 | -0.06 | 7.53E-01 |
| MIR193B       | -0.08 | 6.79E-01 | -0.06 | 7.53E-01 |
| RAB6C         | 0.06  | 7.50E-01 | -0.06 | 7.53E-01 |
| RNU6-1333P    | 0.03  | 8.78E-01 | -0.06 | 7.53E-01 |
| RP11-472N13.3 | -0.09 | 6.54E-01 | -0.06 | 7.53E-01 |
| RP11-608O8.2  | -0.09 | 6.38E-01 | -0.06 | 7.53E-01 |
| SENCR         | -0.24 | 2.17E-01 | -0.06 | 7.53E-01 |
| SNORA73       | -0.22 | 2.68E-01 | -0.06 | 7.53E-01 |
| AC016757.3    | -0.04 | 8.51E-01 | 0.06  | 7.54E-01 |
| EIF2S3L       | 0.22  | 2.51E-01 | 0.06  | 7.54E-01 |
| ITGBL1        | -0.22 | 2.69E-01 | 0.06  | 7.54E-01 |
| NCAM1         | -0.09 | 6.47E-01 | 0.06  | 7.54E-01 |
| NFIA          | 0.06  | 7.66E-01 | 0.06  | 7.54E-01 |
| PEA15         | 0.32  | 1.01E-01 | 0.06  | 7.54E-01 |
| PEX11A        | -0.02 | 9.34E-01 | 0.06  | 7.54E-01 |
| PFDN5         | -0.04 | 8.26E-01 | 0.06  | 7.54E-01 |
| RBM12B-AS1    | 0.26  | 1.87E-01 | 0.06  | 7.54E-01 |
| RP11-116O18.1 | -0.22 | 2.60E-01 | 0.06  | 7.54E-01 |



|               |       |          |       |          |
|---------------|-------|----------|-------|----------|
| RP11-120E11.2 | -0.34 | 8.13E-02 | 0.06  | 7.54E-01 |
| RP11-299M14.2 | -0.01 | 9.76E-01 | 0.06  | 7.54E-01 |
| RP11-567L7.3  | -0.13 | 5.04E-01 | 0.06  | 7.54E-01 |
| RPL10A        | 0.17  | 3.96E-01 | 0.06  | 7.54E-01 |
| SIVA1         | -0.02 | 9.23E-01 | 0.06  | 7.54E-01 |
| SMAD9-IT1     | -0.29 | 1.30E-01 | 0.06  | 7.54E-01 |
| TBC1D24       | 0.03  | 8.88E-01 | 0.06  | 7.54E-01 |
| TMEM91        | 0.02  | 9.04E-01 | 0.06  | 7.54E-01 |
| XLOC_002654   | -0.01 | 9.70E-01 | 0.06  | 7.54E-01 |
| ZNF286A       | 0.19  | 3.35E-01 | 0.06  | 7.54E-01 |
| ATXN7L2       | 0.05  | 8.14E-01 | -0.06 | 7.54E-01 |
| GAPDHP38      | 0.30  | 1.24E-01 | -0.06 | 7.54E-01 |
| KIF1B         | -0.18 | 3.59E-01 | -0.06 | 7.54E-01 |
| PODXL2        | 0.07  | 7.33E-01 | -0.06 | 7.54E-01 |
| RBMS3         | -0.11 | 5.70E-01 | -0.06 | 7.54E-01 |
| RN7SL127P     | -0.08 | 6.98E-01 | -0.06 | 7.54E-01 |
| RNU6-272P     | -0.19 | 3.20E-01 | -0.06 | 7.54E-01 |
| RNU6-611P     | 0.01  | 9.55E-01 | -0.06 | 7.54E-01 |
| RP11-35015.2  | -0.04 | 8.42E-01 | -0.06 | 7.54E-01 |
| SEC16B        | 0.05  | 7.88E-01 | -0.06 | 7.54E-01 |
| UHRF1BP1L     | 0.24  | 2.14E-01 | -0.06 | 7.54E-01 |
| ZC2HC1A       | -0.03 | 8.94E-01 | -0.06 | 7.54E-01 |
| ZWILCH        | 0.17  | 3.82E-01 | -0.06 | 7.54E-01 |
| A1CF          | 0.24  | 2.09E-01 | -0.06 | 7.55E-01 |
| ACAT2         | 0.02  | 9.15E-01 | -0.06 | 7.55E-01 |
| ACTG1         | -0.05 | 8.01E-01 | -0.06 | 7.55E-01 |
| ADH1A         | -0.19 | 3.43E-01 | -0.06 | 7.55E-01 |
| ATP10A        | -0.21 | 2.77E-01 | -0.06 | 7.55E-01 |
| C7            | 0.07  | 7.40E-01 | -0.06 | 7.55E-01 |
| EIF4EP1       | 0.09  | 6.60E-01 | -0.06 | 7.55E-01 |
| FNBP1         | 0.22  | 2.54E-01 | -0.06 | 7.55E-01 |
| G3030         | -0.19 | 3.36E-01 | -0.06 | 7.55E-01 |
| GHR           | 0.14  | 4.81E-01 | -0.06 | 7.55E-01 |
| HAT1          | 0.00  | 9.81E-01 | -0.06 | 7.55E-01 |
| NDNL2         | 0.14  | 4.71E-01 | -0.06 | 7.55E-01 |
| POC1B         | -0.01 | 9.79E-01 | -0.06 | 7.55E-01 |
| PPT2-EGFL8    | -0.15 | 4.42E-01 | -0.06 | 7.55E-01 |
| RNU6-1188P    | -0.20 | 3.20E-01 | -0.06 | 7.55E-01 |
| RP11-164N3.3  | 0.15  | 4.55E-01 | -0.06 | 7.55E-01 |
| RP11-253E3.3  | -0.14 | 4.80E-01 | -0.06 | 7.55E-01 |
| RP11-619J20.1 | -0.22 | 2.58E-01 | -0.06 | 7.55E-01 |
| RP11-887P2.6  | 0.11  | 5.77E-01 | -0.06 | 7.55E-01 |
| RP4-575N6.5   | 0.11  | 5.87E-01 | -0.06 | 7.55E-01 |
| RPL7L1P9      | 0.01  | 9.64E-01 | -0.06 | 7.55E-01 |
| SLC12A2       | 0.16  | 4.24E-01 | -0.06 | 7.55E-01 |
| TMEM256       | -0.09 | 6.52E-01 | -0.06 | 7.55E-01 |
| VWA3B         | 0.01  | 9.43E-01 | -0.06 | 7.55E-01 |

|              |       |          |       |          |
|--------------|-------|----------|-------|----------|
| ADCY5        | 0.09  | 6.34E-01 | 0.06  | 7.55E-01 |
| G18793       | -0.35 | 6.94E-02 | 0.06  | 7.55E-01 |
| GOT2         | 0.14  | 4.76E-01 | 0.06  | 7.55E-01 |
| HMGB1P21     | 0.09  | 6.67E-01 | 0.06  | 7.55E-01 |
| LETM1        | 0.09  | 6.60E-01 | 0.06  | 7.55E-01 |
| LINC00704    | 0.38  | 4.73E-02 | 0.06  | 7.55E-01 |
| MT-TM        | 0.10  | 6.03E-01 | 0.06  | 7.55E-01 |
| NBPF15       | -0.25 | 1.97E-01 | 0.06  | 7.55E-01 |
| PCDHB10      | -0.11 | 5.72E-01 | 0.06  | 7.55E-01 |
| PPFIA1       | -0.20 | 3.09E-01 | 0.06  | 7.55E-01 |
| RP11-319G9.3 | 0.12  | 5.29E-01 | 0.06  | 7.55E-01 |
| RP11-78O7.1  | -0.27 | 1.65E-01 | 0.06  | 7.55E-01 |
| SF3B5        | 0.10  | 6.24E-01 | 0.06  | 7.55E-01 |
| SLC19A1      | 0.10  | 6.23E-01 | 0.06  | 7.55E-01 |
| SNU13        | 0.02  | 9.34E-01 | 0.06  | 7.55E-01 |
| TAS2R30      | -0.03 | 8.76E-01 | 0.06  | 7.55E-01 |
| XLOC_010097  | 0.09  | 6.53E-01 | 0.06  | 7.55E-01 |
| YES1P1       | 0.09  | 6.54E-01 | 0.06  | 7.55E-01 |
| AC074117.10  | 0.08  | 6.79E-01 | -0.06 | 7.56E-01 |
| AC092597.3   | -0.07 | 7.05E-01 | -0.06 | 7.56E-01 |
| AC093627.8   | -0.12 | 5.42E-01 | 0.06  | 7.56E-01 |
| AQP3         | 0.06  | 7.71E-01 | 0.06  | 7.56E-01 |
| BICD2        | 0.02  | 9.04E-01 | 0.06  | 7.56E-01 |
| C1orf195     | -0.37 | 5.46E-02 | -0.06 | 7.56E-01 |
| CNIH1        | 0.08  | 6.83E-01 | 0.06  | 7.56E-01 |
| EMC2         | -0.20 | 3.19E-01 | 0.06  | 7.56E-01 |
| FLJ26245     | 0.12  | 5.28E-01 | 0.06  | 7.56E-01 |
| G10846       | 0.05  | 7.99E-01 | 0.06  | 7.56E-01 |
| GNPTAB       | -0.08 | 6.94E-01 | -0.06 | 7.56E-01 |
| H3F3AP1      | -0.14 | 4.76E-01 | 0.06  | 7.56E-01 |
| HUS1B        | -0.23 | 2.40E-01 | -0.06 | 7.56E-01 |
| INPP5F       | 0.05  | 7.86E-01 | -0.06 | 7.56E-01 |
| LRRC56       | -0.01 | 9.47E-01 | -0.06 | 7.56E-01 |
| LY6G5B       | -0.31 | 1.11E-01 | -0.06 | 7.56E-01 |
| MIR942       | -0.35 | 7.17E-02 | -0.06 | 7.56E-01 |
| MYDGF        | 0.14  | 4.74E-01 | -0.06 | 7.56E-01 |
| NAE1         | 0.01  | 9.43E-01 | -0.06 | 7.56E-01 |
| NAMPTP1      | -0.08 | 6.83E-01 | 0.06  | 7.56E-01 |
| NDC80        | 0.16  | 4.06E-01 | 0.06  | 7.56E-01 |
| PANO1        | 0.23  | 2.44E-01 | -0.06 | 7.56E-01 |
| PARP4        | 0.07  | 7.36E-01 | 0.06  | 7.56E-01 |
| POFUT2       | 0.07  | 7.27E-01 | -0.06 | 7.56E-01 |
| RN7SL506P    | 0.12  | 5.59E-01 | -0.06 | 7.56E-01 |
| RNU6-375P    | -0.25 | 2.00E-01 | -0.06 | 7.56E-01 |
| RP1-41C23.1  | -0.05 | 8.16E-01 | -0.06 | 7.56E-01 |
| RP11-15E18.1 | -0.06 | 7.73E-01 | 0.06  | 7.56E-01 |
| RP11-192P3.4 | -0.25 | 2.08E-01 | 0.06  | 7.56E-01 |

|                |       |          |       |          |
|----------------|-------|----------|-------|----------|
| RP11-206L10.3  | -0.24 | 2.21E-01 | -0.06 | 7.56E-01 |
| RP11-473O4.1   | -0.19 | 3.45E-01 | -0.06 | 7.56E-01 |
| RP11-658F2.8   | 0.01  | 9.67E-01 | -0.06 | 7.56E-01 |
| RP11-771K4.3   | -0.21 | 2.88E-01 | -0.06 | 7.56E-01 |
| RP11-7F17.5    | -0.17 | 3.82E-01 | 0.06  | 7.56E-01 |
| SLC5A2         | -0.11 | 5.92E-01 | -0.06 | 7.56E-01 |
| ST7            | -0.03 | 8.77E-01 | -0.06 | 7.56E-01 |
| WDSUB1         | -0.50 | 6.34E-03 | -0.06 | 7.56E-01 |
| XLOC_002995    | -0.01 | 9.61E-01 | 0.06  | 7.56E-01 |
| AC000068.10    | -0.05 | 7.82E-01 | 0.06  | 7.58E-01 |
| AC010525.4     | -0.29 | 1.40E-01 | 0.06  | 7.58E-01 |
| BLM            | 0.13  | 5.05E-01 | 0.06  | 7.58E-01 |
| DUSP6          | 0.40  | 3.66E-02 | 0.06  | 7.58E-01 |
| LINC01433      | -0.16 | 4.06E-01 | 0.06  | 7.58E-01 |
| MIR1972-1      | 0.00  | 9.86E-01 | 0.06  | 7.58E-01 |
| NPCDR1         | -0.32 | 1.01E-01 | 0.06  | 7.58E-01 |
| RP11-192H23.7  | -0.02 | 9.12E-01 | 0.06  | 7.58E-01 |
| RP11-245P10.4  | -0.12 | 5.41E-01 | 0.06  | 7.58E-01 |
| RP11-271K21.12 | -0.09 | 6.33E-01 | 0.06  | 7.58E-01 |
| RP11-5N19.3    | -0.16 | 4.02E-01 | 0.06  | 7.58E-01 |
| RP3-348I23.2   | 0.07  | 7.24E-01 | 0.06  | 7.58E-01 |
| SPIN2A         | 0.01  | 9.64E-01 | 0.06  | 7.58E-01 |
| XLOC_001188    | 0.20  | 3.04E-01 | 0.06  | 7.58E-01 |
| ASXL3          | 0.21  | 2.87E-01 | -0.06 | 7.58E-01 |
| CTA-204B4.2    | 0.13  | 5.03E-01 | -0.06 | 7.58E-01 |
| CTC-232P5.1    | -0.28 | 1.54E-01 | -0.06 | 7.58E-01 |
| FTH1P16        | 0.00  | 9.85E-01 | -0.06 | 7.58E-01 |
| G25594         | 0.15  | 4.41E-01 | -0.06 | 7.58E-01 |
| GGT7           | 0.16  | 4.12E-01 | -0.06 | 7.58E-01 |
| GOLGA8M        | -0.36 | 6.37E-02 | -0.06 | 7.58E-01 |
| HMG1P12        | 0.17  | 3.82E-01 | -0.06 | 7.58E-01 |
| MAPKBP1        | -0.23 | 2.45E-01 | -0.06 | 7.58E-01 |
| MIR23A         | 0.03  | 8.91E-01 | -0.06 | 7.58E-01 |
| PCDHB14        | -0.13 | 5.00E-01 | -0.06 | 7.58E-01 |
| RN7SL706P      | -0.06 | 7.59E-01 | -0.06 | 7.58E-01 |
| RP11-213G2.3   | -0.05 | 7.96E-01 | -0.06 | 7.58E-01 |
| RP11-359D14.2  | -0.23 | 2.36E-01 | -0.06 | 7.58E-01 |
| RP11-410E4.1   | 0.34  | 7.59E-02 | -0.06 | 7.58E-01 |
| RP11-452D12.1  | -0.15 | 4.53E-01 | -0.06 | 7.58E-01 |
| RPS3AP2        | -0.12 | 5.54E-01 | -0.06 | 7.58E-01 |
| SCARB1         | 0.05  | 7.85E-01 | -0.06 | 7.58E-01 |
| SLC35F2        | -0.09 | 6.48E-01 | -0.06 | 7.58E-01 |
| STRAP          | 0.11  | 5.93E-01 | -0.06 | 7.58E-01 |
| TRBV7-3        | -0.21 | 2.89E-01 | -0.06 | 7.58E-01 |
| AC002310.12    | 0.00  | 9.88E-01 | -0.06 | 7.59E-01 |
| ARNT           | -0.32 | 1.02E-01 | -0.06 | 7.59E-01 |
| CLK2           | -0.13 | 4.98E-01 | 0.06  | 7.59E-01 |

|                      |       |          |       |          |
|----------------------|-------|----------|-------|----------|
| <b>COX6B1</b>        | 0.10  | 6.12E-01 | 0.06  | 7.59E-01 |
| <b>CRYZL1</b>        | -0.25 | 1.94E-01 | 0.06  | 7.59E-01 |
| <b>CTC-321K16.4</b>  | -0.06 | 7.52E-01 | -0.06 | 7.59E-01 |
| <b>CTD-2026K11.5</b> | 0.10  | 5.98E-01 | 0.06  | 7.59E-01 |
| <b>CTD-2319I12.4</b> | 0.01  | 9.61E-01 | 0.06  | 7.59E-01 |
| <b>DDIT4L</b>        | -0.30 | 1.23E-01 | -0.06 | 7.59E-01 |
| <b>DKC1</b>          | 0.17  | 3.86E-01 | -0.06 | 7.59E-01 |
| <b>ECSIT</b>         | 0.15  | 4.46E-01 | 0.06  | 7.59E-01 |
| <b>ELAVL1</b>        | 0.16  | 4.15E-01 | -0.06 | 7.59E-01 |
| <b>G18243</b>        | 0.01  | 9.43E-01 | -0.06 | 7.59E-01 |
| <b>IL17RE</b>        | -0.22 | 2.54E-01 | 0.06  | 7.59E-01 |
| <b>IQCC</b>          | -0.15 | 4.57E-01 | -0.06 | 7.59E-01 |
| <b>KCNS2</b>         | -0.04 | 8.58E-01 | 0.06  | 7.59E-01 |
| <b>LCMT2</b>         | 0.06  | 7.69E-01 | -0.06 | 7.59E-01 |
| <b>LMLN</b>          | -0.09 | 6.49E-01 | -0.06 | 7.59E-01 |
| <b>LSAMP-AS1</b>     | 0.09  | 6.67E-01 | 0.06  | 7.59E-01 |
| <b>MARK2P9</b>       | -0.04 | 8.29E-01 | 0.06  | 7.59E-01 |
| <b>MTDH</b>          | 0.08  | 6.74E-01 | -0.06 | 7.59E-01 |
| <b>NAPSA</b>         | -0.13 | 4.96E-01 | 0.06  | 7.59E-01 |
| <b>NDUFAB1</b>       | 0.14  | 4.81E-01 | -0.06 | 7.59E-01 |
| <b>PARK2</b>         | -0.04 | 8.29E-01 | -0.06 | 7.59E-01 |
| <b>RALA</b>          | -0.01 | 9.46E-01 | -0.06 | 7.59E-01 |
| <b>RN7SL118P</b>     | 0.05  | 8.12E-01 | 0.06  | 7.59E-01 |
| <b>RNF41</b>         | 0.04  | 8.43E-01 | -0.06 | 7.59E-01 |
| <b>RNU7-135P</b>     | -0.30 | 1.25E-01 | -0.06 | 7.59E-01 |
| <b>RP11-282O18.7</b> | 0.26  | 1.82E-01 | 0.06  | 7.59E-01 |
| <b>RP11-325L7.1</b>  | 0.04  | 8.37E-01 | -0.06 | 7.59E-01 |
| <b>RP11-36N20.1</b>  | -0.22 | 2.56E-01 | 0.06  | 7.59E-01 |
| <b>RP11-782C8.5</b>  | -0.09 | 6.38E-01 | -0.06 | 7.59E-01 |
| <b>RP5-1126H10.2</b> | -0.16 | 4.23E-01 | -0.06 | 7.59E-01 |
| <b>RPL18</b>         | 0.27  | 1.67E-01 | 0.06  | 7.59E-01 |
| <b>RPSAP51</b>       | -0.22 | 2.51E-01 | -0.06 | 7.59E-01 |
| <b>SCARNA11</b>      | 0.21  | 2.85E-01 | 0.06  | 7.59E-01 |
| <b>SEMA6A-AS1</b>    | 0.19  | 3.29E-01 | -0.06 | 7.59E-01 |
| <b>6-Sep</b>         | 0.21  | 2.89E-01 | 0.06  | 7.59E-01 |
| <b>SPATA5L1</b>      | 0.14  | 4.81E-01 | 0.06  | 7.59E-01 |
| <b>SRSF8</b>         | 0.15  | 4.35E-01 | -0.06 | 7.59E-01 |
| <b>TAS2R18</b>       | -0.24 | 2.20E-01 | -0.06 | 7.59E-01 |
| <b>TRAJ13</b>        | 0.16  | 4.28E-01 | -0.06 | 7.59E-01 |
| <b>ABHD10</b>        | 0.17  | 3.97E-01 | 0.06  | 7.60E-01 |
| <b>AC007040.11</b>   | -0.09 | 6.32E-01 | -0.06 | 7.60E-01 |
| <b>AC007283.4</b>    | -0.07 | 7.42E-01 | 0.06  | 7.60E-01 |
| <b>ACRV1</b>         | 0.22  | 2.60E-01 | 0.06  | 7.60E-01 |
| <b>AP003064.1</b>    | -0.23 | 2.35E-01 | 0.06  | 7.60E-01 |
| <b>CCT5P1</b>        | -0.24 | 2.18E-01 | -0.06 | 7.60E-01 |
| <b>CNR1</b>          | -0.01 | 9.40E-01 | 0.06  | 7.60E-01 |
| <b>CTA-315H11.2</b>  | -0.07 | 7.42E-01 | -0.06 | 7.60E-01 |

|                      |       |          |       |          |
|----------------------|-------|----------|-------|----------|
| <b>CTC-425O23.2</b>  | -0.32 | 9.93E-02 | -0.06 | 7.60E-01 |
| <b>ERI3-IT1</b>      | -0.12 | 5.40E-01 | 0.06  | 7.60E-01 |
| <b>FLJ37453</b>      | 0.30  | 1.25E-01 | 0.06  | 7.60E-01 |
| <b>GZMM</b>          | 0.03  | 8.64E-01 | 0.06  | 7.60E-01 |
| <b>HACD1</b>         | -0.15 | 4.35E-01 | -0.06 | 7.60E-01 |
| <b>KRTAP4-1</b>      | -0.24 | 2.24E-01 | 0.06  | 7.60E-01 |
| <b>LINC01108</b>     | -0.02 | 9.14E-01 | -0.06 | 7.60E-01 |
| <b>LYSMD1</b>        | 0.09  | 6.50E-01 | 0.06  | 7.60E-01 |
| <b>3-Mar</b>         | -0.05 | 7.85E-01 | -0.06 | 7.60E-01 |
| <b>METTL14</b>       | -0.02 | 9.25E-01 | -0.06 | 7.60E-01 |
| <b>MIR1280</b>       | -0.27 | 1.65E-01 | 0.06  | 7.60E-01 |
| <b>NDUFA7</b>        | -0.02 | 9.18E-01 | -0.06 | 7.60E-01 |
| <b>NKIRAS1</b>       | 0.31  | 1.05E-01 | -0.06 | 7.60E-01 |
| <b>PREX1</b>         | 0.15  | 4.60E-01 | 0.06  | 7.60E-01 |
| <b>RNF208</b>        | 0.21  | 2.77E-01 | 0.06  | 7.60E-01 |
| <b>RNU6-540P</b>     | -0.29 | 1.31E-01 | -0.06 | 7.60E-01 |
| <b>RP11-686G8.1</b>  | -0.03 | 8.86E-01 | -0.06 | 7.60E-01 |
| <b>RP11-705C15.3</b> | 0.04  | 8.58E-01 | -0.06 | 7.60E-01 |
| <b>RP11-750H9.7</b>  | 0.22  | 2.58E-01 | -0.06 | 7.60E-01 |
| <b>RP11-83B20.3</b>  | -0.25 | 1.94E-01 | 0.06  | 7.60E-01 |
| <b>RPL21P135</b>     | -0.03 | 8.70E-01 | 0.06  | 7.60E-01 |
| <b>SH3D21</b>        | -0.07 | 7.11E-01 | -0.06 | 7.60E-01 |
| <b>SPEF1</b>         | 0.08  | 6.75E-01 | -0.06 | 7.60E-01 |
| <b>THPO</b>          | 0.10  | 6.27E-01 | 0.06  | 7.60E-01 |
| <b>TMPOP1</b>        | -0.17 | 3.76E-01 | -0.06 | 7.60E-01 |
| <b>TPP1</b>          | -0.11 | 5.63E-01 | 0.06  | 7.60E-01 |
| <b>VPS51</b>         | 0.03  | 8.86E-01 | 0.06  | 7.60E-01 |
| <b>XLOC_005024</b>   | 0.15  | 4.43E-01 | -0.06 | 7.60E-01 |
| <b>BNIP1</b>         | 0.27  | 1.58E-01 | 0.06  | 7.61E-01 |
| <b>C8G</b>           | 0.01  | 9.40E-01 | 0.06  | 7.61E-01 |
| <b>CRLF3</b>         | 0.53  | 3.87E-03 | 0.06  | 7.61E-01 |
| <b>EMP2</b>          | 0.01  | 9.47E-01 | 0.06  | 7.61E-01 |
| <b>GAPDHP60</b>      | 0.03  | 8.81E-01 | 0.06  | 7.61E-01 |
| <b>GS1-124K5.2</b>   | 0.11  | 5.77E-01 | 0.06  | 7.61E-01 |
| <b>MLIP-IT1</b>      | 0.00  | 9.88E-01 | 0.06  | 7.61E-01 |
| <b>RP11-130C19.3</b> | 0.42  | 2.59E-02 | 0.06  | 7.61E-01 |
| <b>RP11-132G19.3</b> | -0.21 | 2.83E-01 | 0.06  | 7.61E-01 |
| <b>RP11-445F6.2</b>  | -0.12 | 5.46E-01 | 0.06  | 7.61E-01 |
| <b>RP11-497H17.1</b> | -0.20 | 3.13E-01 | 0.06  | 7.61E-01 |
| <b>RP11-659P15.2</b> | -0.14 | 4.93E-01 | 0.06  | 7.61E-01 |
| <b>RP11-9L18.3</b>   | -0.04 | 8.40E-01 | 0.06  | 7.61E-01 |
| <b>RP13-228J13.6</b> | 0.05  | 8.13E-01 | 0.06  | 7.61E-01 |
| <b>SMYD2</b>         | 0.17  | 3.96E-01 | 0.06  | 7.61E-01 |
| <b>SRPK1</b>         | 0.01  | 9.59E-01 | 0.06  | 7.61E-01 |
| <b>TMEM151B</b>      | 0.17  | 3.78E-01 | 0.06  | 7.61E-01 |
| <b>YPEL1</b>         | -0.15 | 4.53E-01 | 0.06  | 7.61E-01 |
| <b>ABLIM3</b>        | -0.38 | 4.37E-02 | -0.06 | 7.61E-01 |

|                      |       |          |       |          |
|----------------------|-------|----------|-------|----------|
| <b>AC008746.12</b>   | -0.08 | 7.00E-01 | -0.06 | 7.61E-01 |
| <b>AC022538.1</b>    | 0.12  | 5.56E-01 | -0.06 | 7.61E-01 |
| <b>C2orf50</b>       | -0.10 | 6.11E-01 | -0.06 | 7.61E-01 |
| <b>CDCA4</b>         | -0.05 | 8.15E-01 | -0.06 | 7.61E-01 |
| <b>COLCA1</b>        | -0.12 | 5.29E-01 | -0.06 | 7.61E-01 |
| <b>DESI2</b>         | 0.12  | 5.43E-01 | -0.06 | 7.61E-01 |
| <b>KAT6B</b>         | -0.20 | 3.09E-01 | -0.06 | 7.61E-01 |
| <b>KIF28P</b>        | -0.08 | 6.69E-01 | -0.06 | 7.61E-01 |
| <b>KRTAP4-4</b>      | -0.23 | 2.29E-01 | -0.06 | 7.61E-01 |
| <b>PMEPA1</b>        | 0.11  | 5.68E-01 | -0.06 | 7.61E-01 |
| <b>RARS2</b>         | -0.03 | 8.62E-01 | -0.06 | 7.61E-01 |
| <b>RP11-201O14.1</b> | -0.06 | 7.70E-01 | -0.06 | 7.61E-01 |
| <b>RP11-2C24.9</b>   | 0.16  | 4.15E-01 | -0.06 | 7.61E-01 |
| <b>RP11-473O4.4</b>  | 0.00  | 9.88E-01 | -0.06 | 7.61E-01 |
| <b>RP5-966M1.4</b>   | -0.23 | 2.38E-01 | -0.06 | 7.61E-01 |
| <b>SRGAP3-AS1</b>    | -0.12 | 5.58E-01 | -0.06 | 7.61E-01 |
| <b>TUBB4B</b>        | 0.14  | 4.90E-01 | -0.06 | 7.61E-01 |
| <b>UCKL1-AS1</b>     | -0.05 | 7.96E-01 | -0.06 | 7.61E-01 |
| <b>ZNF782</b>        | 0.04  | 8.51E-01 | -0.06 | 7.61E-01 |
| <b>AP1B1</b>         | 0.17  | 3.78E-01 | 0.06  | 7.62E-01 |
| <b>BAZ2A</b>         | -0.04 | 8.25E-01 | 0.06  | 7.62E-01 |
| <b>BTBD7</b>         | -0.05 | 8.16E-01 | -0.06 | 7.62E-01 |
| <b>C14orf79</b>      | 0.11  | 5.72E-01 | 0.06  | 7.62E-01 |
| <b>C1orf220</b>      | -0.06 | 7.71E-01 | 0.06  | 7.62E-01 |
| <b>CHL1-AS1</b>      | 0.02  | 9.08E-01 | 0.06  | 7.62E-01 |
| <b>CITED1</b>        | 0.18  | 3.51E-01 | 0.06  | 7.62E-01 |
| <b>CPOX</b>          | 0.37  | 5.18E-02 | 0.06  | 7.62E-01 |
| <b>CS</b>            | 0.03  | 8.95E-01 | 0.06  | 7.62E-01 |
| <b>CTA-989H11.1</b>  | 0.13  | 4.96E-01 | 0.06  | 7.62E-01 |
| <b>CTC-338M12.2</b>  | -0.07 | 7.38E-01 | -0.06 | 7.62E-01 |
| <b>CTC-497E21.5</b>  | 0.05  | 7.89E-01 | 0.06  | 7.62E-01 |
| <b>CTD-2110K23.1</b> | 0.00  | 9.97E-01 | 0.06  | 7.62E-01 |
| <b>CTD-2547E10.3</b> | -0.34 | 7.24E-02 | -0.06 | 7.62E-01 |
| <b>DGUOK</b>         | -0.04 | 8.33E-01 | -0.06 | 7.62E-01 |
| <b>DHRS9</b>         | 0.22  | 2.69E-01 | 0.06  | 7.62E-01 |
| <b>DMBT1</b>         | 0.23  | 2.29E-01 | 0.06  | 7.62E-01 |
| <b>G17695</b>        | -0.02 | 9.35E-01 | -0.06 | 7.62E-01 |
| <b>GTF2H4</b>        | -0.01 | 9.49E-01 | -0.06 | 7.62E-01 |
| <b>HSPD1</b>         | 0.07  | 7.17E-01 | -0.06 | 7.62E-01 |
| <b>KRT19</b>         | -0.07 | 7.37E-01 | -0.06 | 7.62E-01 |
| <b>LINGO4</b>        | -0.22 | 2.65E-01 | -0.06 | 7.62E-01 |
| <b>MCM7</b>          | -0.02 | 9.20E-01 | -0.06 | 7.62E-01 |
| <b>MCPH1-AS1</b>     | -0.11 | 5.92E-01 | -0.06 | 7.62E-01 |
| <b>NCAPG</b>         | 0.08  | 6.92E-01 | 0.06  | 7.62E-01 |
| <b>NRXN1</b>         | -0.15 | 4.42E-01 | -0.06 | 7.62E-01 |
| <b>PCBP1</b>         | -0.13 | 5.25E-01 | 0.06  | 7.62E-01 |
| <b>RBM15B</b>        | 0.27  | 1.69E-01 | 0.06  | 7.62E-01 |

|                      |       |          |       |          |
|----------------------|-------|----------|-------|----------|
| <b>RBM8A</b>         | 0.14  | 4.74E-01 | -0.06 | 7.62E-01 |
| <b>RN7SL109P</b>     | -0.18 | 3.69E-01 | -0.06 | 7.62E-01 |
| <b>RNU6-880P</b>     | 0.15  | 4.55E-01 | -0.06 | 7.62E-01 |
| <b>RP11-1D12.1</b>   | 0.09  | 6.66E-01 | -0.06 | 7.62E-01 |
| <b>RP11-244F12.3</b> | -0.02 | 9.06E-01 | 0.06  | 7.62E-01 |
| <b>RP11-26J3.3</b>   | 0.04  | 8.41E-01 | -0.06 | 7.62E-01 |
| <b>RP11-391L3.3</b>  | -0.12 | 5.32E-01 | -0.06 | 7.62E-01 |
| <b>RP11-651L5.2</b>  | 0.38  | 4.59E-02 | -0.06 | 7.62E-01 |
| <b>RP4-800M22.2</b>  | -0.04 | 8.49E-01 | -0.06 | 7.62E-01 |
| <b>RRP12</b>         | 0.17  | 3.96E-01 | 0.06  | 7.62E-01 |
| <b>SLC15A1</b>       | 0.23  | 2.34E-01 | 0.06  | 7.62E-01 |
| <b>SLC39A7</b>       | 0.04  | 8.35E-01 | 0.06  | 7.62E-01 |
| <b>XLOC_006923</b>   | 0.31  | 1.07E-01 | -0.06 | 7.62E-01 |
| <b>AC005841.1</b>    | -0.07 | 7.38E-01 | -0.06 | 7.63E-01 |
| <b>ADGRA2</b>        | -0.33 | 8.84E-02 | -0.06 | 7.63E-01 |
| <b>CA3-AS1</b>       | -0.14 | 4.70E-01 | -0.06 | 7.63E-01 |
| <b>CD63</b>          | -0.11 | 5.94E-01 | -0.06 | 7.63E-01 |
| <b>DHX57</b>         | -0.13 | 5.15E-01 | -0.06 | 7.63E-01 |
| <b>DOCK1</b>         | -0.08 | 6.70E-01 | -0.06 | 7.63E-01 |
| <b>ESD</b>           | -0.03 | 8.82E-01 | -0.06 | 7.63E-01 |
| <b>G26250</b>        | 0.30  | 1.15E-01 | -0.06 | 7.63E-01 |
| <b>HAPLN1</b>        | -0.09 | 6.37E-01 | -0.06 | 7.63E-01 |
| <b>LINC00240</b>     | 0.01  | 9.75E-01 | -0.06 | 7.63E-01 |
| <b>OR10V2P</b>       | 0.16  | 4.26E-01 | -0.06 | 7.63E-01 |
| <b>RBBP4</b>         | 0.11  | 5.73E-01 | -0.06 | 7.63E-01 |
| <b>RNF207</b>        | 0.05  | 7.93E-01 | -0.06 | 7.63E-01 |
| <b>RNF5</b>          | -0.03 | 8.97E-01 | -0.06 | 7.63E-01 |
| <b>RP11-124D2.7</b>  | 0.03  | 8.97E-01 | -0.06 | 7.63E-01 |
| <b>RP11-63K6.1</b>   | -0.41 | 3.12E-02 | -0.06 | 7.63E-01 |
| <b>RP11-862L9.2</b>  | 0.33  | 8.40E-02 | -0.06 | 7.63E-01 |
| <b>S100A10</b>       | -0.22 | 2.61E-01 | -0.06 | 7.63E-01 |
| <b>TCEA1</b>         | 0.00  | 9.86E-01 | -0.06 | 7.63E-01 |
| <b>WDR59</b>         | -0.10 | 6.25E-01 | -0.06 | 7.63E-01 |
| <b>ANP32B</b>        | -0.11 | 5.90E-01 | 0.06  | 7.63E-01 |
| <b>DNAAF5</b>        | 0.16  | 4.26E-01 | 0.06  | 7.63E-01 |
| <b>DNMT1</b>         | -0.13 | 5.03E-01 | 0.06  | 7.63E-01 |
| <b>DUSP5P1</b>       | -0.15 | 4.47E-01 | 0.06  | 7.63E-01 |
| <b>IL15</b>          | -0.21 | 2.95E-01 | 0.06  | 7.63E-01 |
| <b>KCMF1</b>         | 0.14  | 4.93E-01 | 0.06  | 7.63E-01 |
| <b>LZTS1-AS1</b>     | 0.04  | 8.32E-01 | 0.06  | 7.63E-01 |
| <b>MRPS21</b>        | 0.04  | 8.39E-01 | 0.06  | 7.63E-01 |
| <b>NSMCE1</b>        | 0.01  | 9.74E-01 | 0.06  | 7.63E-01 |
| <b>RNA5SP295</b>     | 0.02  | 9.14E-01 | 0.06  | 7.63E-01 |
| <b>RNU1-59P</b>      | 0.09  | 6.36E-01 | 0.06  | 7.63E-01 |
| <b>RP1-151F17.1</b>  | 0.31  | 1.06E-01 | 0.06  | 7.63E-01 |
| <b>RP11-353N4.6</b>  | -0.30 | 1.27E-01 | 0.06  | 7.63E-01 |
| <b>RP11-368J21.3</b> | -0.06 | 7.57E-01 | 0.06  | 7.63E-01 |

|                |       |          |       |          |
|----------------|-------|----------|-------|----------|
| RP11-408I18.9  | -0.29 | 1.31E-01 | 0.06  | 7.63E-01 |
| RP11-841C19.1  | -0.01 | 9.77E-01 | 0.06  | 7.63E-01 |
| RP11-982M15.6  | 0.27  | 1.65E-01 | 0.06  | 7.63E-01 |
| THSD4-AS1      | -0.07 | 7.38E-01 | 0.06  | 7.63E-01 |
| TXNDC15        | 0.06  | 7.58E-01 | 0.06  | 7.63E-01 |
| UGGT1          | 0.17  | 3.92E-01 | 0.06  | 7.63E-01 |
| ZKSCAN2        | 0.01  | 9.70E-01 | 0.06  | 7.63E-01 |
| ACTR1A         | 0.12  | 5.29E-01 | 0.06  | 7.64E-01 |
| ALG6           | 0.20  | 3.04E-01 | 0.06  | 7.64E-01 |
| BTF3L4         | 0.23  | 2.44E-01 | -0.06 | 7.64E-01 |
| CCNL2          | -0.01 | 9.42E-01 | -0.06 | 7.64E-01 |
| CD46           | -0.13 | 4.95E-01 | -0.06 | 7.64E-01 |
| CLDN10-AS1     | -0.22 | 2.62E-01 | -0.06 | 7.64E-01 |
| CYP7A1         | 0.11  | 5.70E-01 | 0.06  | 7.64E-01 |
| DACT3          | 0.01  | 9.78E-01 | -0.06 | 7.64E-01 |
| DERA           | 0.13  | 4.99E-01 | 0.06  | 7.64E-01 |
| DKK2           | -0.22 | 2.54E-01 | -0.06 | 7.64E-01 |
| G119           | 0.07  | 7.13E-01 | -0.06 | 7.64E-01 |
| GTF2IP1        | -0.12 | 5.45E-01 | -0.06 | 7.64E-01 |
| IRAK1          | 0.19  | 3.40E-01 | 0.06  | 7.64E-01 |
| LYAR           | 0.14  | 4.91E-01 | 0.06  | 7.64E-01 |
| MTFMT          | 0.26  | 1.90E-01 | 0.06  | 7.64E-01 |
| MUC16          | -0.23 | 2.31E-01 | -0.06 | 7.64E-01 |
| PCDHGB7        | -0.08 | 6.73E-01 | -0.06 | 7.64E-01 |
| PCIF1          | -0.13 | 5.12E-01 | -0.06 | 7.64E-01 |
| PPOX           | -0.51 | 5.27E-03 | -0.06 | 7.64E-01 |
| PRPF3          | -0.23 | 2.36E-01 | -0.06 | 7.64E-01 |
| RBFA           | 0.22  | 2.67E-01 | -0.06 | 7.64E-01 |
| RBM22P4        | -0.12 | 5.34E-01 | -0.06 | 7.64E-01 |
| RCOR3          | -0.23 | 2.40E-01 | -0.06 | 7.64E-01 |
| RN7SKP255      | 0.12  | 5.32E-01 | 0.06  | 7.64E-01 |
| RNU4-54P       | -0.15 | 4.44E-01 | 0.06  | 7.64E-01 |
| RNU6-430P      | -0.18 | 3.69E-01 | -0.06 | 7.64E-01 |
| RP1-232L22_B.1 | 0.04  | 8.29E-01 | 0.06  | 7.64E-01 |
| RP11-259N19.1  | 0.24  | 2.20E-01 | 0.06  | 7.64E-01 |
| RP11-403B2.7   | -0.21 | 2.91E-01 | -0.06 | 7.64E-01 |
| RP11-423G4.10  | -0.05 | 7.93E-01 | -0.06 | 7.64E-01 |
| RP11-466F5.10  | 0.06  | 7.79E-01 | -0.06 | 7.64E-01 |
| RP11-643M14.1  | -0.23 | 2.50E-01 | -0.06 | 7.64E-01 |
| RP11-837J7.3   | -0.19 | 3.39E-01 | -0.06 | 7.64E-01 |
| RPSA           | 0.21  | 2.78E-01 | -0.06 | 7.64E-01 |
| SARS           | 0.14  | 4.76E-01 | 0.06  | 7.64E-01 |
| SIKE1          | 0.06  | 7.54E-01 | -0.06 | 7.64E-01 |
| SMN2           | -0.32 | 9.71E-02 | -0.06 | 7.64E-01 |
| TM6SF1         | -0.24 | 2.23E-01 | 0.06  | 7.64E-01 |
| TTC37          | -0.06 | 7.55E-01 | 0.06  | 7.64E-01 |
| AC098820.3     | 0.20  | 3.18E-01 | 0.06  | 7.66E-01 |



|               |       |          |       |          |
|---------------|-------|----------|-------|----------|
| ADAM28        | -0.07 | 7.42E-01 | 0.06  | 7.66E-01 |
| CDC25A        | 0.01  | 9.60E-01 | -0.06 | 7.66E-01 |
| COX7A2L       | 0.13  | 5.07E-01 | -0.06 | 7.66E-01 |
| CTA-351J1.1   | -0.29 | 1.42E-01 | -0.06 | 7.66E-01 |
| DHTKD1        | 0.06  | 7.54E-01 | 0.06  | 7.66E-01 |
| ELMOD2        | 0.06  | 7.75E-01 | -0.06 | 7.66E-01 |
| FABP3         | 0.08  | 6.96E-01 | 0.06  | 7.66E-01 |
| FIG4          | -0.15 | 4.49E-01 | -0.06 | 7.66E-01 |
| GORASP2       | 0.15  | 4.61E-01 | 0.06  | 7.66E-01 |
| IGBP1-AS2     | -0.17 | 3.76E-01 | -0.06 | 7.66E-01 |
| ITGA4         | 0.27  | 1.64E-01 | 0.06  | 7.66E-01 |
| LIPC          | -0.29 | 1.38E-01 | 0.06  | 7.66E-01 |
| MIR149        | 0.04  | 8.22E-01 | -0.06 | 7.66E-01 |
| PI4KA         | -0.04 | 8.45E-01 | 0.06  | 7.66E-01 |
| RP1-313I6.12  | -0.21 | 2.85E-01 | 0.06  | 7.66E-01 |
| RP11-164P12.4 | 0.00  | 9.85E-01 | -0.06 | 7.66E-01 |
| RP11-26L20.4  | 0.10  | 6.23E-01 | 0.06  | 7.66E-01 |
| RP11-43D4.2   | 0.26  | 1.74E-01 | -0.06 | 7.66E-01 |
| RP11-459F6.1  | 0.09  | 6.64E-01 | -0.06 | 7.66E-01 |
| RP11-550A5.2  | 0.21  | 2.75E-01 | 0.06  | 7.66E-01 |
| RP5-875O13.1  | -0.04 | 8.30E-01 | -0.06 | 7.66E-01 |
| SACS          | 0.07  | 7.20E-01 | 0.06  | 7.66E-01 |
| SIN3A         | -0.34 | 7.79E-02 | 0.06  | 7.66E-01 |
| SLC12A8       | 0.23  | 2.29E-01 | 0.06  | 7.66E-01 |
| SNX32         | -0.37 | 5.10E-02 | 0.06  | 7.66E-01 |
| TBL2          | 0.12  | 5.40E-01 | 0.06  | 7.66E-01 |
| TCEA3         | -0.12 | 5.40E-01 | -0.06 | 7.66E-01 |
| XLOC_014010   | 0.11  | 5.70E-01 | -0.06 | 7.66E-01 |
| ZNF781        | -0.26 | 1.87E-01 | -0.06 | 7.66E-01 |
| AC005082.12   | -0.10 | 6.20E-01 | -0.06 | 7.67E-01 |
| AC006369.2    | -0.05 | 8.03E-01 | -0.06 | 7.67E-01 |
| AC012594.1    | -0.17 | 3.84E-01 | 0.06  | 7.67E-01 |
| AC016730.1    | 0.07  | 7.40E-01 | -0.06 | 7.67E-01 |
| AMOTL2        | 0.16  | 4.18E-01 | 0.06  | 7.67E-01 |
| CBR3-AS1      | -0.02 | 9.09E-01 | 0.06  | 7.67E-01 |
| CEP55         | 0.16  | 4.30E-01 | 0.06  | 7.67E-01 |
| COQ10BP2      | 0.05  | 7.82E-01 | 0.06  | 7.67E-01 |
| COX5BP3       | -0.08 | 6.75E-01 | -0.06 | 7.67E-01 |
| CSTF2T        | 0.14  | 4.79E-01 | 0.06  | 7.67E-01 |
| FAM57A        | 0.02  | 9.21E-01 | -0.06 | 7.67E-01 |
| G21880        | 0.31  | 1.06E-01 | -0.06 | 7.67E-01 |
| G40864        | -0.13 | 4.98E-01 | 0.06  | 7.67E-01 |
| GCKR          | -0.02 | 9.22E-01 | 0.06  | 7.67E-01 |
| GS1-124K5.10  | 0.10  | 6.00E-01 | -0.06 | 7.67E-01 |
| HIST1H2BI     | 0.00  | 9.99E-01 | 0.06  | 7.67E-01 |
| KRTAP5-11     | -0.16 | 4.11E-01 | 0.06  | 7.67E-01 |
| NDP           | 0.34  | 7.24E-02 | -0.06 | 7.67E-01 |

|                       |       |          |       |          |
|-----------------------|-------|----------|-------|----------|
| <b>NLRP6</b>          | 0.05  | 7.82E-01 | 0.06  | 7.67E-01 |
| <b>NR1H3</b>          | 0.04  | 8.50E-01 | -0.06 | 7.67E-01 |
| <b>OSBPL11</b>        | -0.02 | 9.16E-01 | -0.06 | 7.67E-01 |
| <b>RP11-674I16.1</b>  | -0.13 | 5.00E-01 | 0.06  | 7.67E-01 |
| <b>RP3-473L9.4</b>    | -0.08 | 6.80E-01 | -0.06 | 7.67E-01 |
| <b>SRRM5</b>          | 0.36  | 6.37E-02 | -0.06 | 7.67E-01 |
| <b>TAF5</b>           | 0.18  | 3.61E-01 | 0.06  | 7.67E-01 |
| <b>TAZ</b>            | -0.14 | 4.66E-01 | -0.06 | 7.67E-01 |
| <b>TBCB</b>           | 0.13  | 5.16E-01 | 0.06  | 7.67E-01 |
| <b>TMEM218</b>        | 0.15  | 4.36E-01 | 0.06  | 7.67E-01 |
| <b>TUBGCP6</b>        | -0.16 | 4.13E-01 | -0.06 | 7.67E-01 |
| <b>AC007557.4</b>     | -0.05 | 7.86E-01 | 0.06  | 7.68E-01 |
| <b>AC069213.4</b>     | -0.23 | 2.35E-01 | 0.06  | 7.68E-01 |
| <b>AC137934.1</b>     | -0.04 | 8.21E-01 | -0.06 | 7.68E-01 |
| <b>BIN3</b>           | -0.05 | 8.09E-01 | -0.06 | 7.68E-01 |
| <b>CEACAM1</b>        | 0.25  | 2.07E-01 | -0.06 | 7.68E-01 |
| <b>CEP295NL</b>       | -0.10 | 6.18E-01 | -0.06 | 7.68E-01 |
| <b>CHCHD5</b>         | 0.17  | 4.01E-01 | 0.06  | 7.68E-01 |
| <b>CHRAC1</b>         | 0.14  | 4.86E-01 | -0.06 | 7.68E-01 |
| <b>CLINT1</b>         | 0.16  | 4.14E-01 | 0.06  | 7.68E-01 |
| <b>CTB-47B11.3</b>    | 0.10  | 6.12E-01 | 0.06  | 7.68E-01 |
| <b>DTHD1</b>          | 0.09  | 6.45E-01 | -0.06 | 7.68E-01 |
| <b>EEF1B2</b>         | 0.14  | 4.69E-01 | -0.06 | 7.68E-01 |
| <b>EGFL8</b>          | -0.19 | 3.31E-01 | -0.06 | 7.68E-01 |
| <b>FAM129B</b>        | 0.17  | 3.93E-01 | 0.06  | 7.68E-01 |
| <b>FGF10</b>          | 0.27  | 1.60E-01 | 0.06  | 7.68E-01 |
| <b>G19546</b>         | 0.00  | 9.80E-01 | -0.06 | 7.68E-01 |
| <b>IFT140</b>         | -0.22 | 2.50E-01 | -0.06 | 7.68E-01 |
| <b>ITGB5-AS1</b>      | -0.41 | 3.06E-02 | -0.06 | 7.68E-01 |
| <b>MIR2909</b>        | 0.09  | 6.56E-01 | -0.06 | 7.68E-01 |
| <b>MIR568</b>         | -0.33 | 8.16E-02 | -0.06 | 7.68E-01 |
| <b>PDE11A</b>         | 0.02  | 9.02E-01 | -0.06 | 7.68E-01 |
| <b>PP7080</b>         | 0.04  | 8.53E-01 | -0.06 | 7.68E-01 |
| <b>PPFIA2</b>         | -0.09 | 6.47E-01 | 0.06  | 7.68E-01 |
| <b>RANP4</b>          | -0.36 | 6.37E-02 | -0.06 | 7.68E-01 |
| <b>RN7SL57P</b>       | 0.22  | 2.53E-01 | -0.06 | 7.68E-01 |
| <b>RNU6-613P</b>      | 0.02  | 9.39E-01 | 0.06  | 7.68E-01 |
| <b>RNU6-897P</b>      | 0.04  | 8.29E-01 | -0.06 | 7.68E-01 |
| <b>RP1-102E24.8</b>   | 0.09  | 6.46E-01 | -0.06 | 7.68E-01 |
| <b>RP11-108K3.3</b>   | -0.09 | 6.65E-01 | 0.06  | 7.68E-01 |
| <b>RP11-1149M10.1</b> | -0.07 | 7.32E-01 | 0.06  | 7.68E-01 |
| <b>RP11-241J12.3</b>  | -0.19 | 3.44E-01 | -0.06 | 7.68E-01 |
| <b>RP11-326C3.11</b>  | 0.03  | 8.79E-01 | 0.06  | 7.68E-01 |
| <b>RP11-342L8.2</b>   | -0.04 | 8.46E-01 | -0.06 | 7.68E-01 |
| <b>RP11-435B5.5</b>   | -0.05 | 7.87E-01 | -0.06 | 7.68E-01 |
| <b>RP11-453N18.1</b>  | -0.07 | 7.19E-01 | -0.06 | 7.68E-01 |
| <b>RP11-685N10.1</b>  | -0.14 | 4.72E-01 | -0.06 | 7.68E-01 |

|                |       |          |       |          |
|----------------|-------|----------|-------|----------|
| RP11-834C11.7  | 0.39  | 3.98E-02 | -0.06 | 7.68E-01 |
| RP11-88E10.5   | 0.15  | 4.40E-01 | 0.06  | 7.68E-01 |
| RP11-97N19.3   | -0.21 | 2.94E-01 | 0.06  | 7.68E-01 |
| RP13-20L14.4   | 0.17  | 3.97E-01 | -0.06 | 7.68E-01 |
| RP3-333A15.2   | 0.32  | 1.01E-01 | 0.06  | 7.68E-01 |
| RP5-997D24.3   | 0.31  | 1.14E-01 | -0.06 | 7.68E-01 |
| SLC12A7        | -0.09 | 6.40E-01 | -0.06 | 7.68E-01 |
| SNRPGP18       | -0.21 | 2.91E-01 | 0.06  | 7.68E-01 |
| TIMM17B        | 0.36  | 5.99E-02 | 0.06  | 7.68E-01 |
| TRIQK          | -0.08 | 6.84E-01 | 0.06  | 7.68E-01 |
| TRMT1          | 0.20  | 3.02E-01 | 0.06  | 7.68E-01 |
| TSNAXIP1       | 0.09  | 6.63E-01 | -0.06 | 7.68E-01 |
| UBE2M          | -0.02 | 9.33E-01 | 0.06  | 7.68E-01 |
| WFDC13         | -0.24 | 2.27E-01 | -0.06 | 7.68E-01 |
| XLOC_013913    | -0.01 | 9.58E-01 | -0.06 | 7.68E-01 |
| YY2            | 0.03  | 8.74E-01 | -0.06 | 7.68E-01 |
| ZBTB26         | -0.15 | 4.34E-01 | 0.06  | 7.68E-01 |
| AC007099.1     | -0.02 | 9.13E-01 | 0.06  | 7.69E-01 |
| AC027612.6     | -0.31 | 1.04E-01 | -0.06 | 7.69E-01 |
| AC068587.2     | -0.31 | 1.04E-01 | -0.06 | 7.69E-01 |
| AP000998.2     | -0.17 | 3.96E-01 | 0.06  | 7.69E-01 |
| APOBEC2        | -0.34 | 7.61E-02 | -0.06 | 7.69E-01 |
| BCDIN3D        | -0.02 | 9.04E-01 | -0.06 | 7.69E-01 |
| C2CD3          | -0.23 | 2.45E-01 | 0.06  | 7.69E-01 |
| C2orf54        | 0.09  | 6.34E-01 | 0.06  | 7.69E-01 |
| CLIP1          | -0.08 | 6.86E-01 | -0.06 | 7.69E-01 |
| COX7B          | 0.06  | 7.57E-01 | 0.06  | 7.69E-01 |
| CR392039.1     | -0.46 | 1.48E-02 | -0.06 | 7.69E-01 |
| CTC-428G20.1   | 0.02  | 9.37E-01 | -0.06 | 7.69E-01 |
| CTD-2046J7.1   | -0.19 | 3.32E-01 | 0.06  | 7.69E-01 |
| CTD-2373H9.5   | 0.04  | 8.22E-01 | 0.06  | 7.69E-01 |
| EID2           | 0.00  | 9.82E-01 | 0.06  | 7.69E-01 |
| GLP2R          | -0.17 | 3.93E-01 | -0.06 | 7.69E-01 |
| HCN4           | 0.08  | 6.99E-01 | -0.06 | 7.69E-01 |
| HIST1H2BB      | 0.03  | 8.85E-01 | 0.06  | 7.69E-01 |
| KLF16          | 0.23  | 2.34E-01 | 0.06  | 7.69E-01 |
| LILRA1         | -0.23 | 2.44E-01 | -0.06 | 7.69E-01 |
| NARF-IT1       | 0.06  | 7.68E-01 | 0.06  | 7.69E-01 |
| OCM            | -0.29 | 1.37E-01 | 0.06  | 7.69E-01 |
| POLRMT         | 0.18  | 3.58E-01 | 0.06  | 7.69E-01 |
| RP11-1070A24.2 | -0.17 | 3.96E-01 | -0.06 | 7.69E-01 |
| RP11-204L24.2  | 0.03  | 8.61E-01 | 0.06  | 7.69E-01 |
| RP11-274J7.2   | -0.10 | 6.31E-01 | -0.06 | 7.69E-01 |
| RP11-28G8.1    | -0.03 | 8.61E-01 | -0.06 | 7.69E-01 |
| RP11-385F5.5   | -0.02 | 9.23E-01 | -0.06 | 7.69E-01 |
| RP11-44N21.1   | 0.13  | 5.20E-01 | -0.06 | 7.69E-01 |
| RP11-57B24.1   | -0.08 | 6.81E-01 | 0.06  | 7.69E-01 |

|                |       |          |       |          |
|----------------|-------|----------|-------|----------|
| RP11-802F5.1   | -0.24 | 2.20E-01 | -0.06 | 7.69E-01 |
| RP3-355L5.5    | -0.11 | 5.62E-01 | -0.06 | 7.69E-01 |
| RP4-604G5.1    | -0.02 | 9.10E-01 | -0.06 | 7.69E-01 |
| RSF1-IT2       | 0.04  | 8.26E-01 | 0.06  | 7.69E-01 |
| SLC13A3        | 0.06  | 7.72E-01 | -0.06 | 7.69E-01 |
| SLC23A3        | 0.05  | 7.85E-01 | 0.06  | 7.69E-01 |
| SNORD113-4     | -0.06 | 7.71E-01 | 0.06  | 7.69E-01 |
| TBCA           | 0.22  | 2.63E-01 | -0.06 | 7.69E-01 |
| TRIM29         | -0.02 | 9.08E-01 | 0.06  | 7.69E-01 |
| UBAC1          | 0.06  | 7.55E-01 | 0.06  | 7.69E-01 |
| ZNF354B        | -0.03 | 8.92E-01 | -0.06 | 7.69E-01 |
| AAR2           | 0.14  | 4.81E-01 | -0.06 | 7.70E-01 |
| AC008277.1     | -0.26 | 1.83E-01 | -0.06 | 7.70E-01 |
| AKR1A1         | 0.02  | 9.29E-01 | 0.06  | 7.70E-01 |
| ATAT1          | 0.20  | 3.05E-01 | -0.06 | 7.70E-01 |
| ATF4P3         | -0.29 | 1.39E-01 | 0.06  | 7.70E-01 |
| ATP5SL         | 0.21  | 2.84E-01 | 0.06  | 7.70E-01 |
| BAP1           | 0.11  | 5.84E-01 | 0.06  | 7.70E-01 |
| CLEC2B         | 0.05  | 7.96E-01 | 0.06  | 7.70E-01 |
| CTB-180A7.6    | 0.26  | 1.78E-01 | -0.06 | 7.70E-01 |
| CTD-2235C13.2  | 0.04  | 8.42E-01 | 0.06  | 7.70E-01 |
| DSTNP2         | -0.01 | 9.47E-01 | 0.06  | 7.70E-01 |
| ENPEP          | -0.22 | 2.63E-01 | 0.06  | 7.70E-01 |
| ESR2           | -0.09 | 6.40E-01 | -0.06 | 7.70E-01 |
| FKBP10         | -0.10 | 6.28E-01 | 0.06  | 7.70E-01 |
| GPAT4          | -0.07 | 7.30E-01 | -0.06 | 7.70E-01 |
| IFI27L1        | 0.12  | 5.46E-01 | 0.06  | 7.70E-01 |
| IFIT1B         | 0.01  | 9.71E-01 | -0.06 | 7.70E-01 |
| JRK            | 0.14  | 4.83E-01 | -0.06 | 7.70E-01 |
| KARSP1         | -0.35 | 6.98E-02 | -0.06 | 7.70E-01 |
| LRRTM1         | -0.01 | 9.42E-01 | -0.06 | 7.70E-01 |
| MC5R           | 0.14  | 4.68E-01 | -0.06 | 7.70E-01 |
| MYBPH          | 0.09  | 6.61E-01 | 0.06  | 7.70E-01 |
| OPN1SW         | -0.20 | 3.02E-01 | -0.06 | 7.70E-01 |
| PHYKPL         | -0.29 | 1.38E-01 | -0.06 | 7.70E-01 |
| PLA1A          | -0.13 | 4.93E-01 | -0.06 | 7.70E-01 |
| RP11-17G12.3   | 0.16  | 4.29E-01 | -0.06 | 7.70E-01 |
| RP11-461G12.2  | -0.24 | 2.23E-01 | 0.06  | 7.70E-01 |
| RP11-519G16.3  | -0.01 | 9.68E-01 | -0.06 | 7.70E-01 |
| RP11-571I18.2  | 0.08  | 6.99E-01 | 0.06  | 7.70E-01 |
| RP11-665G4.1   | 0.00  | 9.90E-01 | 0.06  | 7.70E-01 |
| RP11-73M11.3   | 0.15  | 4.46E-01 | -0.06 | 7.70E-01 |
| RP11-867G23.12 | 0.12  | 5.48E-01 | 0.06  | 7.70E-01 |
| RP4-724E13.2   | -0.40 | 3.49E-02 | -0.06 | 7.70E-01 |
| RP5-864K19.6   | -0.02 | 9.16E-01 | -0.06 | 7.70E-01 |
| RP5-908M14.9   | 0.11  | 5.85E-01 | 0.06  | 7.70E-01 |
| SC22CB-1D7.1   | -0.25 | 1.99E-01 | -0.06 | 7.70E-01 |

|                |       |          |       |          |
|----------------|-------|----------|-------|----------|
| SRPK2          | -0.24 | 2.11E-01 | -0.06 | 7.70E-01 |
| TMEM167A       | 0.01  | 9.45E-01 | -0.06 | 7.70E-01 |
| UNC5CL         | 0.00  | 9.92E-01 | -0.06 | 7.70E-01 |
| WI2-85898F10.2 | -0.23 | 2.32E-01 | 0.06  | 7.70E-01 |
| YIF1A          | 0.01  | 9.57E-01 | 0.06  | 7.70E-01 |
| AC007743.1     | 0.09  | 6.67E-01 | 0.06  | 7.71E-01 |
| AC078864.1     | -0.03 | 8.93E-01 | -0.06 | 7.71E-01 |
| ACACB          | -0.08 | 7.02E-01 | -0.06 | 7.71E-01 |
| AOX1           | -0.08 | 6.93E-01 | -0.06 | 7.71E-01 |
| API5           | 0.07  | 7.38E-01 | -0.06 | 7.71E-01 |
| C1QL3          | 0.15  | 4.34E-01 | 0.06  | 7.71E-01 |
| C9orf106       | -0.05 | 8.14E-01 | -0.06 | 7.71E-01 |
| CTB-2L9.1      | 0.01  | 9.50E-01 | -0.06 | 7.71E-01 |
| CTD-2001C12.1  | -0.02 | 9.18E-01 | -0.06 | 7.71E-01 |
| CYP4Z1         | -0.28 | 1.52E-01 | 0.06  | 7.71E-01 |
| DYDC2          | -0.10 | 6.04E-01 | 0.06  | 7.71E-01 |
| G24802         | -0.03 | 8.79E-01 | -0.06 | 7.71E-01 |
| G32166         | -0.04 | 8.54E-01 | -0.06 | 7.71E-01 |
| G32695         | 0.23  | 2.48E-01 | -0.06 | 7.71E-01 |
| G43485         | 0.15  | 4.43E-01 | -0.06 | 7.71E-01 |
| GSG1L          | 0.03  | 8.78E-01 | 0.06  | 7.71E-01 |
| HLA-DQB1-AS1   | -0.42 | 2.52E-02 | 0.06  | 7.71E-01 |
| HOTAIRM1       | -0.21 | 2.83E-01 | -0.06 | 7.71E-01 |
| KCNG3          | 0.09  | 6.66E-01 | -0.06 | 7.71E-01 |
| LINC01090      | -0.24 | 2.25E-01 | 0.06  | 7.71E-01 |
| MIR3942        | -0.08 | 7.00E-01 | 0.06  | 7.71E-01 |
| NPM1P41        | 0.07  | 7.11E-01 | -0.06 | 7.71E-01 |
| POLD2          | 0.00  | 9.99E-01 | 0.06  | 7.71E-01 |
| POLR2D         | 0.08  | 6.88E-01 | -0.06 | 7.71E-01 |
| RP11-13K12.5   | -0.01 | 9.47E-01 | -0.06 | 7.71E-01 |
| RP11-21B21.4   | -0.33 | 8.45E-02 | 0.06  | 7.71E-01 |
| RP11-307L14.2  | 0.38  | 4.71E-02 | -0.06 | 7.71E-01 |
| RP11-46A10.5   | -0.26 | 1.88E-01 | -0.06 | 7.71E-01 |
| RP11-849N15.3  | -0.22 | 2.56E-01 | 0.06  | 7.71E-01 |
| RP3-368A4.6    | 0.05  | 8.02E-01 | -0.06 | 7.71E-01 |
| RPL39          | 0.18  | 3.54E-01 | 0.06  | 7.71E-01 |
| SIL1           | 0.17  | 3.97E-01 | 0.06  | 7.71E-01 |
| SNRPEP9        | 0.21  | 2.93E-01 | 0.06  | 7.71E-01 |
| TOMM40         | 0.22  | 2.63E-01 | -0.06 | 7.71E-01 |
| TPMTP2         | 0.10  | 6.15E-01 | -0.06 | 7.71E-01 |
| TRAJ37         | 0.06  | 7.44E-01 | -0.06 | 7.71E-01 |
| WDR45B         | 0.28  | 1.49E-01 | 0.06  | 7.71E-01 |
| XK             | 0.07  | 7.39E-01 | -0.06 | 7.71E-01 |
| XPC            | 0.03  | 8.82E-01 | 0.06  | 7.71E-01 |
| ZFH2           | -0.12 | 5.31E-01 | 0.06  | 7.71E-01 |
| ZNF200         | 0.14  | 4.78E-01 | -0.06 | 7.71E-01 |
| ARL3           | -0.01 | 9.64E-01 | -0.06 | 7.73E-01 |

|               |       |          |       |          |
|---------------|-------|----------|-------|----------|
| CAPNS2        | 0.08  | 6.96E-01 | 0.06  | 7.73E-01 |
| CCNC          | 0.12  | 5.40E-01 | -0.06 | 7.73E-01 |
| CEP126        | -0.34 | 7.37E-02 | -0.06 | 7.73E-01 |
| CHAF1B        | -0.09 | 6.34E-01 | 0.06  | 7.73E-01 |
| CLUL1         | 0.34  | 7.72E-02 | -0.06 | 7.73E-01 |
| CTD-2298J14.2 | -0.19 | 3.37E-01 | -0.06 | 7.73E-01 |
| CTD-2649C14.3 | -0.08 | 6.96E-01 | 0.06  | 7.73E-01 |
| EBLN3         | -0.03 | 8.71E-01 | -0.06 | 7.73E-01 |
| ENOX1         | -0.06 | 7.79E-01 | -0.06 | 7.73E-01 |
| FAM159A       | -0.10 | 6.04E-01 | -0.06 | 7.73E-01 |
| FANCI         | -0.05 | 7.82E-01 | -0.06 | 7.73E-01 |
| HES1          | 0.01  | 9.58E-01 | -0.06 | 7.73E-01 |
| LRFN2         | 0.37  | 5.60E-02 | 0.06  | 7.73E-01 |
| MAPK8IP2      | 0.08  | 6.76E-01 | -0.06 | 7.73E-01 |
| MIR186        | -0.28 | 1.51E-01 | -0.06 | 7.73E-01 |
| MPLKIP        | -0.03 | 8.78E-01 | -0.06 | 7.73E-01 |
| MRPS18C       | 0.07  | 7.15E-01 | -0.06 | 7.73E-01 |
| RN7SL189P     | -0.19 | 3.21E-01 | -0.06 | 7.73E-01 |
| RP11-272L13.2 | -0.13 | 5.01E-01 | 0.06  | 7.73E-01 |
| RP11-665C16.5 | 0.21  | 2.75E-01 | -0.06 | 7.73E-01 |
| RP13-766D20.2 | -0.18 | 3.60E-01 | -0.06 | 7.73E-01 |
| RPL11         | 0.14  | 4.81E-01 | -0.06 | 7.73E-01 |
| SLC30A6       | 0.35  | 6.96E-02 | 0.06  | 7.73E-01 |
| SNORA70B      | 0.13  | 5.10E-01 | -0.06 | 7.73E-01 |
| TCL1A         | 0.17  | 3.76E-01 | -0.06 | 7.73E-01 |
| TDRD10        | -0.36 | 5.94E-02 | -0.06 | 7.73E-01 |
| TEPP          | 0.19  | 3.33E-01 | -0.06 | 7.73E-01 |
| TRAPPC3       | 0.19  | 3.41E-01 | 0.06  | 7.73E-01 |
| XLOC_006941   | -0.15 | 4.34E-01 | -0.06 | 7.73E-01 |
| AC002400.1    | -0.26 | 1.84E-01 | -0.06 | 7.74E-01 |
| AC017028.8    | 0.02  | 9.39E-01 | -0.06 | 7.74E-01 |
| AGRP          | 0.24  | 2.25E-01 | 0.06  | 7.74E-01 |
| ARHGAP40      | 0.00  | 9.80E-01 | -0.06 | 7.74E-01 |
| BCORL1        | -0.24 | 2.25E-01 | 0.06  | 7.74E-01 |
| CALM1         | 0.20  | 2.99E-01 | 0.06  | 7.74E-01 |
| CAPZA1        | 0.28  | 1.56E-01 | 0.06  | 7.74E-01 |
| CTB-175E5.7   | 0.41  | 2.98E-02 | -0.06 | 7.74E-01 |
| CYP1A1        | -0.20 | 3.10E-01 | -0.06 | 7.74E-01 |
| EHMT1-IT1     | -0.19 | 3.28E-01 | 0.06  | 7.74E-01 |
| EIF4EBP3      | -0.01 | 9.51E-01 | -0.06 | 7.74E-01 |
| EXOSC3        | 0.08  | 6.86E-01 | -0.06 | 7.74E-01 |
| G12163        | -0.13 | 5.16E-01 | 0.06  | 7.74E-01 |
| G5143         | 0.17  | 3.73E-01 | -0.06 | 7.74E-01 |
| GBGT1         | 0.39  | 4.14E-02 | 0.06  | 7.74E-01 |
| HIST1H2BJ     | -0.01 | 9.66E-01 | 0.06  | 7.74E-01 |
| KMT2A         | -0.09 | 6.61E-01 | 0.06  | 7.74E-01 |
| LINC01420     | 0.35  | 6.44E-02 | 0.06  | 7.74E-01 |

|               |       |          |       |          |
|---------------|-------|----------|-------|----------|
| LINC01546     | 0.09  | 6.43E-01 | 0.06  | 7.74E-01 |
| LRRC8E        | 0.10  | 5.97E-01 | -0.06 | 7.74E-01 |
| MAFG-AS1      | 0.11  | 5.84E-01 | 0.06  | 7.74E-01 |
| MAPRE1        | 0.29  | 1.35E-01 | -0.06 | 7.74E-01 |
| MTA1          | -0.13 | 5.13E-01 | 0.06  | 7.74E-01 |
| MUC7          | 0.01  | 9.55E-01 | 0.06  | 7.74E-01 |
| NOL10         | 0.05  | 8.02E-01 | -0.06 | 7.74E-01 |
| ODF3          | -0.05 | 8.00E-01 | -0.06 | 7.74E-01 |
| OXTR          | -0.39 | 4.23E-02 | 0.06  | 7.74E-01 |
| PIP           | -0.15 | 4.60E-01 | -0.06 | 7.74E-01 |
| PLK3          | 0.06  | 7.70E-01 | 0.06  | 7.74E-01 |
| RAD51         | 0.07  | 7.39E-01 | -0.06 | 7.74E-01 |
| RFC2          | -0.14 | 4.66E-01 | -0.06 | 7.74E-01 |
| RNU6-415P     | -0.03 | 8.98E-01 | -0.06 | 7.74E-01 |
| RP11-126O1.4  | 0.07  | 7.29E-01 | 0.06  | 7.74E-01 |
| RP11-197K3.1  | -0.02 | 9.29E-01 | 0.06  | 7.74E-01 |
| RP11-236P24.3 | -0.08 | 6.96E-01 | -0.06 | 7.74E-01 |
| RP11-295D4.3  | 0.02  | 9.06E-01 | -0.06 | 7.74E-01 |
| RP11-299P2.1  | -0.07 | 7.41E-01 | 0.06  | 7.74E-01 |
| RP11-463D19.1 | 0.12  | 5.50E-01 | -0.06 | 7.74E-01 |
| RP11-477J21.2 | -0.01 | 9.60E-01 | 0.06  | 7.74E-01 |
| RP11-627K11.3 | 0.05  | 8.18E-01 | 0.06  | 7.74E-01 |
| RP11-680G24.6 | 0.19  | 3.37E-01 | -0.06 | 7.74E-01 |
| RP13-1032I1.7 | 0.15  | 4.34E-01 | -0.06 | 7.74E-01 |
| RP5-1021I20.4 | -0.18 | 3.60E-01 | -0.06 | 7.74E-01 |
| RPL36AP29     | -0.55 | 2.46E-03 | -0.06 | 7.74E-01 |
| RPL37A        | 0.22  | 2.70E-01 | -0.06 | 7.74E-01 |
| STT3A         | 0.07  | 7.33E-01 | 0.06  | 7.74E-01 |
| TMEM205       | 0.31  | 1.13E-01 | 0.06  | 7.74E-01 |
| ZBTB40        | -0.01 | 9.77E-01 | 0.06  | 7.74E-01 |
| AC016683.5    | 0.00  | 9.99E-01 | 0.06  | 7.75E-01 |
| AGPS          | -0.09 | 6.36E-01 | 0.06  | 7.75E-01 |
| ALDH3A1       | -0.06 | 7.44E-01 | -0.06 | 7.75E-01 |
| ATP5O         | 0.23  | 2.38E-01 | -0.06 | 7.75E-01 |
| BMPR1APS1     | -0.16 | 4.04E-01 | 0.06  | 7.75E-01 |
| CAMK2D        | 0.03  | 8.73E-01 | -0.06 | 7.75E-01 |
| CCT6P3        | 0.07  | 7.14E-01 | -0.06 | 7.75E-01 |
| CSPG4P11      | -0.09 | 6.34E-01 | -0.06 | 7.75E-01 |
| CTD-2002H8.2  | 0.12  | 5.42E-01 | 0.06  | 7.75E-01 |
| CTD-2666L21.1 | -0.05 | 7.99E-01 | -0.06 | 7.75E-01 |
| DANCR         | 0.06  | 7.64E-01 | 0.06  | 7.75E-01 |
| DLG2          | -0.06 | 7.69E-01 | -0.06 | 7.75E-01 |
| FARP1         | -0.43 | 2.39E-02 | -0.06 | 7.75E-01 |
| FLJ20306      | 0.08  | 6.94E-01 | 0.06  | 7.75E-01 |
| GNL2          | 0.15  | 4.61E-01 | -0.06 | 7.75E-01 |
| GRPR          | -0.25 | 2.03E-01 | 0.06  | 7.75E-01 |
| L3MBTL4-AS1   | -0.08 | 6.79E-01 | 0.06  | 7.75E-01 |

|               |       |          |       |          |
|---------------|-------|----------|-------|----------|
| LAGE3         | 0.05  | 8.00E-01 | 0.06  | 7.75E-01 |
| LHCGR         | -0.25 | 2.05E-01 | 0.06  | 7.75E-01 |
| LUM           | -0.22 | 2.59E-01 | -0.06 | 7.75E-01 |
| MAFTRR        | -0.12 | 5.53E-01 | 0.06  | 7.75E-01 |
| MFF           | 0.01  | 9.75E-01 | -0.06 | 7.75E-01 |
| PARP2         | -0.22 | 2.59E-01 | -0.06 | 7.75E-01 |
| PCDH1         | 0.10  | 5.96E-01 | 0.06  | 7.75E-01 |
| PIK3R4        | 0.01  | 9.69E-01 | -0.06 | 7.75E-01 |
| PPT1          | 0.20  | 3.05E-01 | 0.06  | 7.75E-01 |
| PTPRF         | -0.05 | 8.03E-01 | 0.06  | 7.75E-01 |
| RFC1          | 0.08  | 6.87E-01 | -0.06 | 7.75E-01 |
| RP11-119K6.6  | -0.14 | 4.88E-01 | 0.06  | 7.75E-01 |
| RP11-157P1.4  | 0.15  | 4.51E-01 | 0.06  | 7.75E-01 |
| RP11-407B7.1  | 0.15  | 4.54E-01 | -0.06 | 7.75E-01 |
| RP11-4K3__A.3 | 0.02  | 9.12E-01 | 0.06  | 7.75E-01 |
| RP11-50I19.1  | -0.38 | 4.44E-02 | -0.06 | 7.75E-01 |
| RP11-537I16.2 | 0.06  | 7.53E-01 | -0.06 | 7.75E-01 |
| RP4-737E23.7  | 0.06  | 7.79E-01 | 0.06  | 7.75E-01 |
| RTFDC1        | 0.05  | 7.97E-01 | 0.06  | 7.75E-01 |
| TMEM50B       | -0.15 | 4.34E-01 | -0.06 | 7.75E-01 |
| TNS4          | 0.18  | 3.66E-01 | -0.06 | 7.75E-01 |
| TOX3          | -0.31 | 1.14E-01 | -0.06 | 7.75E-01 |
| TRIP4         | -0.10 | 5.95E-01 | 0.06  | 7.75E-01 |
| XLOC_007718   | -0.42 | 2.81E-02 | -0.06 | 7.75E-01 |
| XLOC_014080   | -0.35 | 7.03E-02 | -0.06 | 7.75E-01 |
| ZNF444        | 0.21  | 2.83E-01 | -0.06 | 7.75E-01 |
| AC009120.11   | -0.21 | 2.86E-01 | -0.06 | 7.76E-01 |
| AC109992.1    | -0.05 | 8.13E-01 | 0.06  | 7.76E-01 |
| AP000266.7    | 0.14  | 4.83E-01 | 0.06  | 7.76E-01 |
| C21orf91-OT1  | -0.01 | 9.49E-01 | 0.06  | 7.76E-01 |
| CAB39         | 0.21  | 2.87E-01 | -0.06 | 7.76E-01 |
| COX20P1       | -0.45 | 1.74E-02 | 0.06  | 7.76E-01 |
| EFCAB5        | -0.14 | 4.82E-01 | 0.06  | 7.76E-01 |
| EIF1B-AS1     | 0.11  | 5.79E-01 | 0.06  | 7.76E-01 |
| FAM58A        | 0.15  | 4.33E-01 | 0.06  | 7.76E-01 |
| FEM1B         | 0.13  | 4.94E-01 | -0.06 | 7.76E-01 |
| G28021        | -0.06 | 7.43E-01 | -0.06 | 7.76E-01 |
| GATM-AS1      | 0.08  | 6.68E-01 | 0.06  | 7.76E-01 |
| HMGB3P14      | 0.10  | 5.97E-01 | -0.06 | 7.76E-01 |
| LRRC28        | -0.15 | 4.54E-01 | 0.06  | 7.76E-01 |
| LTBP4         | 0.09  | 6.33E-01 | -0.06 | 7.76E-01 |
| MARK2P13      | -0.19 | 3.29E-01 | -0.06 | 7.76E-01 |
| NEIL1         | -0.20 | 3.15E-01 | -0.06 | 7.76E-01 |
| NOXA1         | -0.21 | 2.83E-01 | -0.06 | 7.76E-01 |
| NRXN2         | 0.16  | 4.24E-01 | 0.06  | 7.76E-01 |
| PCP4          | 0.15  | 4.44E-01 | -0.06 | 7.76E-01 |
| PLA2G6        | -0.05 | 8.18E-01 | -0.06 | 7.76E-01 |



|                      |       |          |       |          |
|----------------------|-------|----------|-------|----------|
| <b>RNU6-160P</b>     | 0.21  | 2.90E-01 | 0.06  | 7.76E-01 |
| <b>RP11-203M5.7</b>  | -0.12 | 5.40E-01 | -0.06 | 7.76E-01 |
| <b>RP11-59C5.3</b>   | 0.03  | 8.89E-01 | 0.06  | 7.76E-01 |
| <b>RP13-210D15.8</b> | 0.03  | 8.61E-01 | 0.06  | 7.76E-01 |
| <b>RP4-735C1.4</b>   | 0.07  | 7.07E-01 | -0.06 | 7.76E-01 |
| <b>RP5-991G20.2</b>  | 0.04  | 8.45E-01 | -0.06 | 7.76E-01 |
| <b>SRSF7</b>         | 0.06  | 7.58E-01 | -0.06 | 7.76E-01 |
| <b>THAP1</b>         | 0.15  | 4.61E-01 | 0.06  | 7.76E-01 |
| <b>TSPYL2</b>        | -0.07 | 7.30E-01 | 0.06  | 7.76E-01 |
| <b>ZNF33BP1</b>      | -0.27 | 1.66E-01 | -0.06 | 7.76E-01 |
| <b>ABCA12</b>        | 0.13  | 5.19E-01 | 0.06  | 7.77E-01 |
| <b>AC092782.1</b>    | 0.22  | 2.59E-01 | 0.06  | 7.77E-01 |
| <b>AL359542.1</b>    | -0.05 | 7.95E-01 | -0.06 | 7.77E-01 |
| <b>AP1M1</b>         | -0.03 | 8.85E-01 | 0.06  | 7.77E-01 |
| <b>ARHGAP6</b>       | 0.00  | 9.93E-01 | 0.06  | 7.77E-01 |
| <b>AXIN1</b>         | 0.21  | 2.78E-01 | 0.06  | 7.77E-01 |
| <b>CDK1</b>          | 0.24  | 2.23E-01 | -0.06 | 7.77E-01 |
| <b>CYP2C19</b>       | -0.20 | 3.02E-01 | -0.06 | 7.77E-01 |
| <b>DDX56</b>         | 0.17  | 3.92E-01 | 0.06  | 7.77E-01 |
| <b>ETV2</b>          | -0.02 | 9.21E-01 | 0.06  | 7.77E-01 |
| <b>G16821</b>        | 0.03  | 8.89E-01 | 0.06  | 7.77E-01 |
| <b>G36172</b>        | 0.11  | 5.83E-01 | -0.06 | 7.77E-01 |
| <b>GRHPR</b>         | -0.04 | 8.25E-01 | 0.06  | 7.77E-01 |
| <b>LA16c-380H5.5</b> | -0.03 | 8.68E-01 | 0.06  | 7.77E-01 |
| <b>LINC00475</b>     | 0.03  | 8.79E-01 | 0.06  | 7.77E-01 |
| <b>MRPL23-AS1</b>    | -0.19 | 3.36E-01 | -0.06 | 7.77E-01 |
| <b>MTRNR2L8</b>      | 0.20  | 3.06E-01 | 0.06  | 7.77E-01 |
| <b>NLRC5</b>         | 0.13  | 5.09E-01 | -0.06 | 7.77E-01 |
| <b>NR2E3</b>         | 0.09  | 6.63E-01 | -0.06 | 7.77E-01 |
| <b>RABGAP1L-IT1</b>  | -0.01 | 9.48E-01 | 0.06  | 7.77E-01 |
| <b>RMST</b>          | -0.08 | 6.98E-01 | -0.06 | 7.77E-01 |
| <b>RNF138P1</b>      | -0.24 | 2.13E-01 | -0.06 | 7.77E-01 |
| <b>RP11-219A15.1</b> | -0.23 | 2.35E-01 | -0.06 | 7.77E-01 |
| <b>RP11-386I14.2</b> | -0.10 | 6.24E-01 | -0.06 | 7.77E-01 |
| <b>RP11-67L3.4</b>   | 0.05  | 8.02E-01 | 0.06  | 7.77E-01 |
| <b>RP11-70L8.5</b>   | -0.03 | 8.99E-01 | -0.06 | 7.77E-01 |
| <b>RP11-814H16.2</b> | 0.10  | 5.95E-01 | -0.06 | 7.77E-01 |
| <b>RP5-1009E24.8</b> | -0.12 | 5.53E-01 | 0.06  | 7.77E-01 |
| <b>RPS11</b>         | 0.13  | 5.25E-01 | 0.06  | 7.77E-01 |
| <b>RPS3AP47</b>      | -0.22 | 2.56E-01 | 0.06  | 7.77E-01 |
| <b>SLC2A11</b>       | -0.19 | 3.37E-01 | -0.06 | 7.77E-01 |
| <b>SLC39A10</b>      | -0.03 | 8.91E-01 | -0.06 | 7.77E-01 |
| <b>SYNJ1</b>         | 0.10  | 6.17E-01 | 0.06  | 7.77E-01 |
| <b>TOMM20P2</b>      | 0.02  | 9.36E-01 | -0.06 | 7.77E-01 |
| <b>TRBV9</b>         | 0.09  | 6.52E-01 | 0.06  | 7.77E-01 |
| <b>XLOC_010695</b>   | 0.04  | 8.50E-01 | 0.06  | 7.77E-01 |
| <b>ATP2A2</b>        | 0.01  | 9.74E-01 | -0.06 | 7.78E-01 |

|               |       |          |       |          |
|---------------|-------|----------|-------|----------|
| BEX1          | -0.48 | 1.05E-02 | -0.06 | 7.78E-01 |
| COMMD4        | 0.06  | 7.79E-01 | -0.06 | 7.78E-01 |
| DPH2          | 0.10  | 6.29E-01 | 0.06  | 7.78E-01 |
| EIF2S3        | 0.09  | 6.36E-01 | -0.06 | 7.78E-01 |
| EIF5A         | 0.13  | 5.03E-01 | 0.06  | 7.78E-01 |
| ITGB1BP1      | -0.09 | 6.40E-01 | -0.06 | 7.78E-01 |
| KHDRBS1       | 0.07  | 7.07E-01 | 0.06  | 7.78E-01 |
| LRBA          | -0.02 | 9.17E-01 | -0.06 | 7.78E-01 |
| MIR640        | 0.13  | 5.23E-01 | 0.06  | 7.78E-01 |
| MPPE1         | 0.18  | 3.52E-01 | 0.06  | 7.78E-01 |
| MYO1E         | 0.15  | 4.38E-01 | 0.06  | 7.78E-01 |
| PCDH17        | 0.07  | 7.09E-01 | -0.06 | 7.78E-01 |
| PPT2          | 0.10  | 6.23E-01 | -0.06 | 7.78E-01 |
| RNU6-204P     | 0.11  | 5.71E-01 | -0.06 | 7.78E-01 |
| RNU6-930P     | 0.13  | 5.24E-01 | 0.06  | 7.78E-01 |
| RP1-224A6.8   | -0.10 | 6.29E-01 | -0.06 | 7.78E-01 |
| RP11-30K9.4   | -0.07 | 7.05E-01 | -0.06 | 7.78E-01 |
| RP11-403P17.6 | 0.28  | 1.48E-01 | -0.06 | 7.78E-01 |
| RP11-451B8.1  | -0.05 | 8.18E-01 | -0.06 | 7.78E-01 |
| RP11-508N12.3 | -0.35 | 7.01E-02 | -0.06 | 7.78E-01 |
| RP11-568J23.6 | -0.07 | 7.18E-01 | 0.06  | 7.78E-01 |
| RP3-333H23.9  | -0.20 | 3.00E-01 | -0.06 | 7.78E-01 |
| RP3-508I15.21 | -0.13 | 4.99E-01 | 0.06  | 7.78E-01 |
| RPS5          | 0.16  | 4.21E-01 | 0.06  | 7.78E-01 |
| SERP1         | 0.09  | 6.55E-01 | -0.06 | 7.78E-01 |
| SMPDL3B       | 0.14  | 4.71E-01 | 0.06  | 7.78E-01 |
| STX18-IT1     | -0.08 | 7.04E-01 | 0.06  | 7.78E-01 |
| UHRF1BP1      | 0.15  | 4.31E-01 | 0.06  | 7.78E-01 |
| WASF2         | 0.07  | 7.22E-01 | 0.06  | 7.78E-01 |
| AC002066.1    | 0.13  | 5.05E-01 | 0.06  | 7.80E-01 |
| AF146191.4    | -0.07 | 7.40E-01 | 0.06  | 7.80E-01 |
| AL354808.2    | -0.08 | 6.84E-01 | -0.06 | 7.80E-01 |
| AL358815.1    | -0.02 | 9.10E-01 | -0.06 | 7.80E-01 |
| CCNB1IP1      | 0.09  | 6.64E-01 | 0.06  | 7.80E-01 |
| CTD-2587M2.1  | 0.00  | 9.82E-01 | 0.06  | 7.80E-01 |
| DCTN2         | 0.05  | 7.83E-01 | 0.06  | 7.80E-01 |
| DNLZ          | 0.23  | 2.34E-01 | -0.06 | 7.80E-01 |
| GABARAPL2     | -0.03 | 8.95E-01 | 0.06  | 7.80E-01 |
| GMEB1         | 0.09  | 6.50E-01 | 0.06  | 7.80E-01 |
| GS1-124K5.12  | 0.02  | 9.33E-01 | -0.06 | 7.80E-01 |
| KLHDC7A       | 0.33  | 9.07E-02 | 0.06  | 7.80E-01 |
| LGALS3        | -0.22 | 2.58E-01 | -0.06 | 7.80E-01 |
| MAP6D1        | 0.12  | 5.29E-01 | -0.06 | 7.80E-01 |
| MIR491        | 0.23  | 2.49E-01 | 0.06  | 7.80E-01 |
| NDUFA9P1      | -0.18 | 3.68E-01 | -0.06 | 7.80E-01 |
| PRKAR1AP      | -0.26 | 1.81E-01 | -0.06 | 7.80E-01 |
| PTOV1         | 0.15  | 4.55E-01 | 0.06  | 7.80E-01 |

|                       |       |          |       |          |
|-----------------------|-------|----------|-------|----------|
| <b>RBM3</b>           | 0.29  | 1.40E-01 | 0.06  | 7.80E-01 |
| <b>RP11-1002K11.1</b> | -0.18 | 3.49E-01 | -0.06 | 7.80E-01 |
| <b>RP11-18H7.1</b>    | -0.07 | 7.20E-01 | -0.06 | 7.80E-01 |
| <b>RP11-508N22.12</b> | -0.22 | 2.63E-01 | -0.06 | 7.80E-01 |
| <b>RP11-568G11.4</b>  | -0.33 | 8.45E-02 | -0.06 | 7.80E-01 |
| <b>RP11-644F5.10</b>  | -0.10 | 6.08E-01 | 0.06  | 7.80E-01 |
| <b>RP11-674I16.2</b>  | -0.06 | 7.62E-01 | 0.06  | 7.80E-01 |
| <b>RP13-638C3.2</b>   | -0.17 | 3.97E-01 | 0.06  | 7.80E-01 |
| <b>RP4-657D16.6</b>   | -0.16 | 4.19E-01 | 0.06  | 7.80E-01 |
| <b>RPL21P8</b>        | -0.40 | 3.49E-02 | 0.06  | 7.80E-01 |
| <b>TP53TG3D</b>       | 0.13  | 5.15E-01 | 0.06  | 7.80E-01 |
| <b>TRAP1</b>          | 0.13  | 5.05E-01 | -0.06 | 7.80E-01 |
| <b>TTC21A</b>         | -0.05 | 8.15E-01 | 0.06  | 7.80E-01 |
| <b>USP34</b>          | -0.07 | 7.36E-01 | -0.06 | 7.80E-01 |
| <b>ZFP82</b>          | -0.19 | 3.39E-01 | 0.06  | 7.80E-01 |
| <b>AC093838.4</b>     | -0.47 | 1.13E-02 | -0.06 | 7.81E-01 |
| <b>AC124914.3</b>     | 0.04  | 8.44E-01 | -0.06 | 7.81E-01 |
| <b>ADSL</b>           | 0.20  | 3.03E-01 | 0.06  | 7.81E-01 |
| <b>AHSA1</b>          | -0.08 | 6.99E-01 | -0.06 | 7.81E-01 |
| <b>BRAFP1</b>         | -0.12 | 5.34E-01 | -0.06 | 7.81E-01 |
| <b>COL18A1-AS1</b>    | -0.07 | 7.21E-01 | 0.06  | 7.81E-01 |
| <b>DOCK9-AS1</b>      | 0.26  | 1.89E-01 | -0.06 | 7.81E-01 |
| <b>FAM175B</b>        | 0.08  | 6.96E-01 | -0.06 | 7.81E-01 |
| <b>FDPSP3</b>         | 0.44  | 1.82E-02 | 0.06  | 7.81E-01 |
| <b>FOXN3-AS2</b>      | 0.05  | 8.10E-01 | -0.06 | 7.81E-01 |
| <b>G26856</b>         | -0.11 | 5.65E-01 | -0.06 | 7.81E-01 |
| <b>HTT</b>            | -0.23 | 2.39E-01 | -0.06 | 7.81E-01 |
| <b>LAMA4</b>          | -0.36 | 6.07E-02 | 0.06  | 7.81E-01 |
| <b>MT1L</b>           | 0.13  | 5.25E-01 | 0.06  | 7.81E-01 |
| <b>MTHFD1</b>         | 0.13  | 4.99E-01 | 0.06  | 7.81E-01 |
| <b>NDUFB1</b>         | 0.10  | 6.31E-01 | 0.06  | 7.81E-01 |
| <b>NUP35</b>          | 0.22  | 2.59E-01 | 0.06  | 7.81E-01 |
| <b>PPP4R1</b>         | 0.07  | 7.36E-01 | 0.06  | 7.81E-01 |
| <b>PRKAB1</b>         | 0.03  | 8.93E-01 | 0.06  | 7.81E-01 |
| <b>RN7SL481P</b>      | -0.01 | 9.75E-01 | -0.06 | 7.81E-01 |
| <b>RNU6-495P</b>      | -0.31 | 1.09E-01 | -0.06 | 7.81E-01 |
| <b>RP1-168P16.3</b>   | -0.13 | 4.98E-01 | -0.06 | 7.81E-01 |
| <b>RP1-77H15.1</b>    | -0.11 | 5.64E-01 | 0.06  | 7.81E-01 |
| <b>RP11-1072C15.1</b> | 0.21  | 2.85E-01 | -0.06 | 7.81E-01 |
| <b>RP11-1094H24.4</b> | -0.07 | 7.16E-01 | -0.06 | 7.81E-01 |
| <b>RP11-128N14.4</b>  | -0.04 | 8.32E-01 | -0.06 | 7.81E-01 |
| <b>RP11-131L12.4</b>  | 0.23  | 2.41E-01 | -0.06 | 7.81E-01 |
| <b>RP11-138H8.8</b>   | -0.18 | 3.59E-01 | -0.06 | 7.81E-01 |
| <b>RP11-375N9.2</b>   | -0.04 | 8.25E-01 | 0.06  | 7.81E-01 |
| <b>RP11-443P15.2</b>  | -0.19 | 3.45E-01 | -0.06 | 7.81E-01 |
| <b>RP11-632P5.1</b>   | -0.27 | 1.64E-01 | -0.06 | 7.81E-01 |
| <b>RP11-748C4.1</b>   | 0.06  | 7.63E-01 | -0.06 | 7.81E-01 |

|                |       |          |       |          |
|----------------|-------|----------|-------|----------|
| RP11-863H1.1   | -0.01 | 9.79E-01 | -0.06 | 7.81E-01 |
| RP11-930P14.2  | 0.07  | 7.05E-01 | 0.06  | 7.81E-01 |
| SMYD5          | 0.21  | 2.75E-01 | 0.06  | 7.81E-01 |
| TIMM17A        | 0.20  | 2.96E-01 | -0.06 | 7.81E-01 |
| TMEM184C       | 0.16  | 4.28E-01 | 0.06  | 7.81E-01 |
| TNNI3K         | -0.12 | 5.42E-01 | -0.06 | 7.81E-01 |
| TSACC          | -0.12 | 5.57E-01 | -0.06 | 7.81E-01 |
| TUSC8          | -0.11 | 5.92E-01 | 0.06  | 7.81E-01 |
| USP11          | -0.03 | 8.62E-01 | -0.06 | 7.81E-01 |
| XLOC_005369    | -0.19 | 3.24E-01 | -0.06 | 7.81E-01 |
| ZNF655         | -0.25 | 1.99E-01 | -0.06 | 7.81E-01 |
| ADGRE5         | -0.18 | 3.66E-01 | -0.06 | 7.82E-01 |
| AP000351.10    | 0.03  | 8.80E-01 | 0.06  | 7.82E-01 |
| CD2BP2         | 0.36  | 6.01E-02 | -0.06 | 7.82E-01 |
| CMTM2          | -0.16 | 4.19E-01 | -0.06 | 7.82E-01 |
| COMMD8         | 0.24  | 2.16E-01 | -0.06 | 7.82E-01 |
| CSTL1          | -0.19 | 3.24E-01 | -0.06 | 7.82E-01 |
| CTD-2283N19.1  | 0.10  | 6.14E-01 | -0.06 | 7.82E-01 |
| CYB5RL         | 0.30  | 1.17E-01 | 0.06  | 7.82E-01 |
| FRMD6-AS2      | 0.15  | 4.37E-01 | -0.06 | 7.82E-01 |
| GJA4           | -0.21 | 2.89E-01 | 0.06  | 7.82E-01 |
| HIST1H3B       | 0.04  | 8.43E-01 | -0.06 | 7.82E-01 |
| KB-1254G8.1    | -0.16 | 4.20E-01 | 0.06  | 7.82E-01 |
| MB             | -0.06 | 7.70E-01 | 0.06  | 7.82E-01 |
| MKRN3          | -0.09 | 6.41E-01 | 0.06  | 7.82E-01 |
| MYH9           | 0.22  | 2.71E-01 | 0.06  | 7.82E-01 |
| N6AMT1         | 0.11  | 5.70E-01 | -0.06 | 7.82E-01 |
| NPBWR1         | -0.07 | 7.18E-01 | 0.06  | 7.82E-01 |
| PSMD10         | -0.16 | 4.24E-01 | -0.06 | 7.82E-01 |
| RP11-10A14.9   | -0.45 | 1.74E-02 | 0.06  | 7.82E-01 |
| RP11-10C24.3   | -0.07 | 7.18E-01 | 0.06  | 7.82E-01 |
| RP11-1280N14.3 | 0.02  | 9.04E-01 | -0.06 | 7.82E-01 |
| RP11-190J23.1  | -0.25 | 2.05E-01 | -0.06 | 7.82E-01 |
| RP11-278C7.2   | -0.22 | 2.57E-01 | -0.06 | 7.82E-01 |
| RP11-420A23.1  | 0.36  | 6.09E-02 | 0.06  | 7.82E-01 |
| RPS26          | 0.14  | 4.82E-01 | 0.06  | 7.82E-01 |
| SEL1L3         | 0.16  | 4.10E-01 | 0.06  | 7.82E-01 |
| TGS1           | 0.41  | 2.95E-02 | -0.06 | 7.82E-01 |
| TRIAP1         | 0.00  | 9.96E-01 | -0.06 | 7.82E-01 |
| TUSC5          | 0.18  | 3.60E-01 | -0.06 | 7.82E-01 |
| UTAT33         | -0.17 | 3.91E-01 | -0.06 | 7.82E-01 |
| VAMP5          | -0.06 | 7.50E-01 | -0.06 | 7.82E-01 |
| WDR88          | -0.04 | 8.30E-01 | 0.06  | 7.82E-01 |
| ZPR1           | 0.10  | 5.97E-01 | -0.06 | 7.82E-01 |
| AC006946.17    | -0.24 | 2.21E-01 | 0.06  | 7.83E-01 |
| ACTR1B         | 0.17  | 3.97E-01 | 0.06  | 7.83E-01 |
| ANXA5          | -0.06 | 7.51E-01 | -0.06 | 7.83E-01 |

|                |       |          |       |          |
|----------------|-------|----------|-------|----------|
| ARL4C          | 0.13  | 5.23E-01 | 0.06  | 7.83E-01 |
| ASNSP6         | -0.04 | 8.27E-01 | 0.06  | 7.83E-01 |
| ATP6V1D        | 0.17  | 3.74E-01 | 0.06  | 7.83E-01 |
| C17orf78       | 0.06  | 7.79E-01 | 0.06  | 7.83E-01 |
| C5orf17        | -0.10 | 6.15E-01 | 0.06  | 7.83E-01 |
| C9orf40        | 0.11  | 5.92E-01 | 0.06  | 7.83E-01 |
| CDHR1          | -0.29 | 1.28E-01 | -0.06 | 7.83E-01 |
| CTC-421K24.1   | 0.15  | 4.54E-01 | 0.06  | 7.83E-01 |
| CTD-2024I7.13  | -0.34 | 7.44E-02 | -0.06 | 7.83E-01 |
| CTD-2381F24.1  | -0.08 | 6.90E-01 | -0.06 | 7.83E-01 |
| EVA1B          | 0.03  | 8.99E-01 | 0.06  | 7.83E-01 |
| FAM86B2        | -0.23 | 2.31E-01 | -0.06 | 7.83E-01 |
| GS1-124K5.3    | 0.12  | 5.43E-01 | 0.06  | 7.83E-01 |
| HGH1           | 0.19  | 3.40E-01 | -0.06 | 7.83E-01 |
| HSDL2          | -0.13 | 5.02E-01 | 0.06  | 7.83E-01 |
| KIFAP3         | -0.01 | 9.70E-01 | 0.06  | 7.83E-01 |
| LINC00926      | 0.11  | 5.89E-01 | 0.06  | 7.83E-01 |
| 8-Mar          | -0.04 | 8.40E-01 | -0.06 | 7.83E-01 |
| MDK            | -0.05 | 8.05E-01 | -0.06 | 7.83E-01 |
| MLIP-AS1       | 0.06  | 7.61E-01 | 0.06  | 7.83E-01 |
| PCID2          | 0.11  | 5.71E-01 | -0.06 | 7.83E-01 |
| PTH1R          | -0.35 | 6.77E-02 | -0.06 | 7.83E-01 |
| RHOXF2         | -0.06 | 7.78E-01 | -0.06 | 7.83E-01 |
| RP1-232P20.1   | 0.14  | 4.80E-01 | 0.06  | 7.83E-01 |
| RP11-123N4.4   | 0.00  | 9.92E-01 | 0.06  | 7.83E-01 |
| RP11-296A18.5  | 0.15  | 4.49E-01 | 0.06  | 7.83E-01 |
| RP11-299L17.1  | 0.04  | 8.38E-01 | -0.06 | 7.83E-01 |
| RP11-335G20.7  | -0.20 | 3.09E-01 | -0.06 | 7.83E-01 |
| RP11-574K11.32 | -0.25 | 2.07E-01 | -0.06 | 7.83E-01 |
| RP11-94P14.1   | -0.39 | 4.21E-02 | 0.06  | 7.83E-01 |
| RPL15P2        | -0.15 | 4.49E-01 | 0.06  | 7.83E-01 |
| STK19B         | -0.14 | 4.89E-01 | 0.06  | 7.83E-01 |
| TEX22          | 0.10  | 6.23E-01 | -0.06 | 7.83E-01 |
| TRAJ17         | -0.17 | 3.99E-01 | -0.06 | 7.83E-01 |
| XLOC_013543    | 0.38  | 4.83E-02 | 0.06  | 7.83E-01 |
| AL049539.1     | -0.24 | 2.26E-01 | 0.06  | 7.84E-01 |
| ALG10B         | 0.09  | 6.40E-01 | -0.06 | 7.84E-01 |
| C11orf96       | -0.07 | 7.21E-01 | -0.06 | 7.84E-01 |
| CCT3           | 0.16  | 4.28E-01 | -0.06 | 7.84E-01 |
| CTD-2555O16.2  | -0.11 | 5.70E-01 | -0.06 | 7.84E-01 |
| DDX31          | 0.05  | 7.94E-01 | -0.06 | 7.84E-01 |
| EPAS1          | 0.00  | 9.99E-01 | -0.06 | 7.84E-01 |
| ESRG           | -0.11 | 5.60E-01 | -0.06 | 7.84E-01 |
| FAM35BP        | 0.23  | 2.37E-01 | 0.06  | 7.84E-01 |
| G10141         | 0.27  | 1.65E-01 | -0.06 | 7.84E-01 |
| G35261         | -0.04 | 8.27E-01 | -0.06 | 7.84E-01 |
| GAPDHP46       | -0.14 | 4.64E-01 | 0.06  | 7.84E-01 |

|                      |       |          |       |          |
|----------------------|-------|----------|-------|----------|
| <b>GPR33</b>         | 0.02  | 9.00E-01 | 0.06  | 7.84E-01 |
| <b>LRRC29</b>        | 0.16  | 4.11E-01 | -0.06 | 7.84E-01 |
| <b>MIEF1</b>         | 0.31  | 1.12E-01 | -0.06 | 7.84E-01 |
| <b>MIR1180</b>       | -0.08 | 6.79E-01 | -0.06 | 7.84E-01 |
| <b>NMNAT1P1</b>      | -0.20 | 3.16E-01 | 0.06  | 7.84E-01 |
| <b>NSUN2</b>         | 0.15  | 4.47E-01 | -0.06 | 7.84E-01 |
| <b>PCDHB9</b>        | -0.23 | 2.36E-01 | 0.06  | 7.84E-01 |
| <b>PSG1</b>          | 0.33  | 8.48E-02 | 0.06  | 7.84E-01 |
| <b>RP1-168L15.5</b>  | -0.19 | 3.23E-01 | 0.06  | 7.84E-01 |
| <b>RP1-197B17.7</b>  | -0.02 | 9.11E-01 | 0.06  | 7.84E-01 |
| <b>RP11-76C10.5</b>  | 0.11  | 5.87E-01 | -0.06 | 7.84E-01 |
| <b>RP11-83J16.3</b>  | 0.31  | 1.11E-01 | 0.06  | 7.84E-01 |
| <b>RP4-784A16.2</b>  | -0.14 | 4.82E-01 | -0.06 | 7.84E-01 |
| <b>SERPINH1</b>      | -0.07 | 7.39E-01 | -0.06 | 7.84E-01 |
| <b>SLC25A14P1</b>    | -0.26 | 1.87E-01 | -0.06 | 7.84E-01 |
| <b>SNX12</b>         | 0.21  | 2.78E-01 | 0.06  | 7.84E-01 |
| <b>TCP11L2</b>       | -0.16 | 4.04E-01 | -0.06 | 7.84E-01 |
| <b>TUBAP2</b>        | -0.08 | 6.85E-01 | 0.06  | 7.84E-01 |
| <b>XLOC_014083</b>   | 0.18  | 3.49E-01 | 0.06  | 7.84E-01 |
| <b>A4GALT</b>        | -0.22 | 2.68E-01 | -0.05 | 7.85E-01 |
| <b>AC009237.8</b>    | -0.31 | 1.08E-01 | -0.05 | 7.85E-01 |
| <b>CFAP100</b>       | -0.05 | 8.01E-01 | -0.05 | 7.85E-01 |
| <b>CTC-492K19.4</b>  | -0.08 | 6.96E-01 | -0.05 | 7.85E-01 |
| <b>CTD-2515A14.1</b> | 0.31  | 1.09E-01 | -0.05 | 7.85E-01 |
| <b>CTD-2651B20.6</b> | 0.23  | 2.41E-01 | -0.05 | 7.85E-01 |
| <b>KAT8</b>          | -0.08 | 6.97E-01 | -0.05 | 7.85E-01 |
| <b>LINC00517</b>     | 0.24  | 2.24E-01 | -0.05 | 7.85E-01 |
| <b>LINC00899</b>     | -0.11 | 5.71E-01 | -0.05 | 7.85E-01 |
| <b>LSG1</b>          | 0.21  | 2.77E-01 | -0.05 | 7.85E-01 |
| <b>MRPS12</b>        | 0.10  | 6.09E-01 | -0.05 | 7.85E-01 |
| <b>NFIX</b>          | -0.02 | 9.28E-01 | -0.05 | 7.85E-01 |
| <b>PDZD9</b>         | -0.21 | 2.73E-01 | -0.05 | 7.85E-01 |
| <b>PHKA2</b>         | 0.16  | 4.27E-01 | -0.05 | 7.85E-01 |
| <b>RP11-118M9.3</b>  | -0.17 | 4.00E-01 | -0.05 | 7.85E-01 |
| <b>RP11-392O1.4</b>  | 0.04  | 8.43E-01 | -0.05 | 7.85E-01 |
| <b>RP11-526K21.2</b> | -0.40 | 3.29E-02 | -0.05 | 7.85E-01 |
| <b>RP11-64K7.1</b>   | 0.04  | 8.36E-01 | -0.05 | 7.85E-01 |
| <b>AC114969.1</b>    | -0.43 | 2.34E-02 | 0.05  | 7.85E-01 |
| <b>BDKRB1</b>        | -0.03 | 8.71E-01 | 0.05  | 7.85E-01 |
| <b>CIAPIN1</b>       | 0.27  | 1.57E-01 | 0.05  | 7.85E-01 |
| <b>CTD-2595P9.2</b>  | -0.04 | 8.22E-01 | 0.05  | 7.85E-01 |
| <b>DLGAP5</b>        | 0.10  | 6.04E-01 | 0.05  | 7.85E-01 |
| <b>EXOSC7</b>        | -0.11 | 5.77E-01 | 0.05  | 7.85E-01 |
| <b>G11276</b>        | 0.27  | 1.66E-01 | 0.05  | 7.85E-01 |
| <b>HEY1</b>          | -0.12 | 5.59E-01 | 0.05  | 7.85E-01 |
| <b>HN1L</b>          | 0.09  | 6.45E-01 | 0.05  | 7.85E-01 |
| <b>LINC01268</b>     | -0.11 | 5.67E-01 | 0.05  | 7.85E-01 |

|               |       |          |       |          |
|---------------|-------|----------|-------|----------|
| MT-TV         | 0.05  | 8.19E-01 | 0.05  | 7.85E-01 |
| PITHD1        | 0.04  | 8.53E-01 | 0.05  | 7.85E-01 |
| RP11-440L14.4 | 0.20  | 2.97E-01 | 0.05  | 7.85E-01 |
| RP11-46A10.8  | -0.11 | 5.72E-01 | 0.05  | 7.85E-01 |
| RP11-680G10.1 | -0.06 | 7.48E-01 | 0.05  | 7.85E-01 |
| RP4-730K3.3   | 0.10  | 6.23E-01 | 0.05  | 7.85E-01 |
| RPL29P24      | -0.07 | 7.33E-01 | 0.05  | 7.85E-01 |
| RPS18P9       | 0.31  | 1.09E-01 | 0.05  | 7.85E-01 |
| S100A13       | -0.05 | 8.09E-01 | 0.05  | 7.85E-01 |
| SBSN          | 0.07  | 7.18E-01 | 0.05  | 7.85E-01 |
| U6            | -0.01 | 9.47E-01 | 0.05  | 7.85E-01 |
| UBE2I         | 0.05  | 7.95E-01 | 0.05  | 7.85E-01 |
| XLOC_006312   | -0.16 | 4.10E-01 | 0.05  | 7.85E-01 |
| AC005224.2    | -0.15 | 4.46E-01 | -0.05 | 7.87E-01 |
| AP000462.1    | 0.18  | 3.46E-01 | 0.05  | 7.87E-01 |
| ASXL1         | 0.09  | 6.34E-01 | 0.05  | 7.87E-01 |
| BFAR          | 0.14  | 4.69E-01 | -0.05 | 7.87E-01 |
| C19orf70      | 0.15  | 4.36E-01 | -0.05 | 7.87E-01 |
| CAPN5         | -0.12 | 5.44E-01 | 0.05  | 7.87E-01 |
| CTC-366B18.4  | -0.16 | 4.04E-01 | -0.05 | 7.87E-01 |
| CTC-428G20.6  | 0.10  | 5.96E-01 | -0.05 | 7.87E-01 |
| EMC3          | 0.19  | 3.30E-01 | 0.05  | 7.87E-01 |
| FAM71C        | -0.05 | 8.10E-01 | -0.05 | 7.87E-01 |
| FBXW4P1       | 0.03  | 8.64E-01 | 0.05  | 7.87E-01 |
| G354          | 0.06  | 7.77E-01 | 0.05  | 7.87E-01 |
| HESX1         | -0.29 | 1.28E-01 | 0.05  | 7.87E-01 |
| INCENP        | 0.06  | 7.59E-01 | -0.05 | 7.87E-01 |
| KLRC1         | -0.05 | 7.86E-01 | -0.05 | 7.87E-01 |
| KRT18P15      | 0.15  | 4.53E-01 | 0.05  | 7.87E-01 |
| LRRC26        | -0.18 | 3.51E-01 | 0.05  | 7.87E-01 |
| MIR4263       | -0.04 | 8.22E-01 | 0.05  | 7.87E-01 |
| NUP85         | 0.03  | 8.74E-01 | 0.05  | 7.87E-01 |
| POU5F1P5      | -0.18 | 3.55E-01 | 0.05  | 7.87E-01 |
| RN7SKP239     | -0.13 | 5.15E-01 | -0.05 | 7.87E-01 |
| RNU6-1291P    | 0.03  | 8.90E-01 | -0.05 | 7.87E-01 |
| RP1-118J21.25 | 0.16  | 4.26E-01 | -0.05 | 7.87E-01 |
| RP11-138I1.3  | 0.16  | 4.16E-01 | -0.05 | 7.87E-01 |
| RP11-156K13.1 | 0.27  | 1.72E-01 | -0.05 | 7.87E-01 |
| RP11-161M6.6  | -0.15 | 4.60E-01 | -0.05 | 7.87E-01 |
| RP11-206F17.2 | 0.07  | 7.33E-01 | 0.05  | 7.87E-01 |
| RP11-289H16.1 | -0.71 | 2.25E-05 | -0.05 | 7.87E-01 |
| RP11-812I20.2 | -0.09 | 6.40E-01 | -0.05 | 7.87E-01 |
| RP11-89K11.1  | -0.18 | 3.63E-01 | 0.05  | 7.87E-01 |
| RP5-963E22.6  | 0.30  | 1.15E-01 | -0.05 | 7.87E-01 |
| RTL1          | -0.16 | 4.08E-01 | -0.05 | 7.87E-01 |
| SLC15A2       | 0.04  | 8.58E-01 | -0.05 | 7.87E-01 |
| SLIT2-IT1     | 0.03  | 8.78E-01 | -0.05 | 7.87E-01 |

|               |       |          |       |          |
|---------------|-------|----------|-------|----------|
| SMYD3         | -0.14 | 4.92E-01 | 0.05  | 7.87E-01 |
| SNRPCP3       | -0.37 | 5.21E-02 | -0.05 | 7.87E-01 |
| SS18L2        | 0.07  | 7.15E-01 | 0.05  | 7.87E-01 |
| URGCP         | 0.10  | 5.97E-01 | 0.05  | 7.87E-01 |
| XLOC_005768   | -0.23 | 2.29E-01 | 0.05  | 7.87E-01 |
| XLOC_006645   | 0.09  | 6.59E-01 | 0.05  | 7.87E-01 |
| ALAS2         | -0.21 | 2.78E-01 | 0.05  | 7.88E-01 |
| BNIP3P8       | 0.03  | 8.71E-01 | -0.05 | 7.88E-01 |
| CCDC144B      | 0.07  | 7.26E-01 | 0.05  | 7.88E-01 |
| CTD-2544H17.1 | -0.22 | 2.56E-01 | -0.05 | 7.88E-01 |
| FOXJ1         | 0.06  | 7.71E-01 | -0.05 | 7.88E-01 |
| HCAR1         | 0.03  | 8.97E-01 | -0.05 | 7.88E-01 |
| HNF1A         | -0.30 | 1.27E-01 | 0.05  | 7.88E-01 |
| ILK           | -0.35 | 6.84E-02 | -0.05 | 7.88E-01 |
| MIR1539       | -0.11 | 5.63E-01 | -0.05 | 7.88E-01 |
| MIRLET7A1     | 0.10  | 6.15E-01 | 0.05  | 7.88E-01 |
| MRPS11        | 0.26  | 1.74E-01 | 0.05  | 7.88E-01 |
| P2RX6P        | 0.42  | 2.72E-02 | -0.05 | 7.88E-01 |
| PGAM1P4       | 0.33  | 8.81E-02 | 0.05  | 7.88E-01 |
| PRDX6         | 0.02  | 9.34E-01 | -0.05 | 7.88E-01 |
| RN7SKP154     | 0.03  | 8.73E-01 | -0.05 | 7.88E-01 |
| RNA5SP82      | 0.26  | 1.90E-01 | 0.05  | 7.88E-01 |
| RP11-211A18.1 | -0.15 | 4.43E-01 | -0.05 | 7.88E-01 |
| RP11-288G3.4  | -0.22 | 2.71E-01 | -0.05 | 7.88E-01 |
| RP11-377D9.3  | -0.08 | 6.95E-01 | 0.05  | 7.88E-01 |
| RP11-684B2.3  | -0.34 | 7.34E-02 | -0.05 | 7.88E-01 |
| RP5-937E21.8  | 0.10  | 6.19E-01 | -0.05 | 7.88E-01 |
| SCARNA10      | -0.07 | 7.16E-01 | 0.05  | 7.88E-01 |
| SCRN2         | -0.21 | 2.85E-01 | 0.05  | 7.88E-01 |
| SEPT7P6       | -0.01 | 9.64E-01 | -0.05 | 7.88E-01 |
| SGMS1-AS1     | -0.14 | 4.89E-01 | 0.05  | 7.88E-01 |
| SH3GL3        | 0.12  | 5.52E-01 | 0.05  | 7.88E-01 |
| THUMPD3       | 0.13  | 5.14E-01 | 0.05  | 7.88E-01 |
| TRDC          | 0.05  | 8.12E-01 | -0.05 | 7.88E-01 |
| XLOC_004166   | 0.29  | 1.33E-01 | -0.05 | 7.88E-01 |
| ZDHHC13       | 0.28  | 1.48E-01 | -0.05 | 7.88E-01 |
| AC007383.3    | -0.08 | 6.89E-01 | 0.05  | 7.89E-01 |
| ATP5C1        | 0.07  | 7.12E-01 | -0.05 | 7.89E-01 |
| C10orf35      | -0.04 | 8.54E-01 | -0.05 | 7.89E-01 |
| CTD-2666L21.3 | 0.03  | 8.61E-01 | -0.05 | 7.89E-01 |
| DPY19L3       | 0.01  | 9.57E-01 | -0.05 | 7.89E-01 |
| EIF4A2P2      | 0.18  | 3.60E-01 | -0.05 | 7.89E-01 |
| FIGNL1        | 0.16  | 4.08E-01 | 0.05  | 7.89E-01 |
| KLK5          | -0.21 | 2.79E-01 | -0.05 | 7.89E-01 |
| LAMA5-AS1     | -0.20 | 3.19E-01 | -0.05 | 7.89E-01 |
| PCDHAC1       | -0.14 | 4.66E-01 | -0.05 | 7.89E-01 |
| PHLDA2        | 0.21  | 2.80E-01 | 0.05  | 7.89E-01 |



|                |       |          |       |          |
|----------------|-------|----------|-------|----------|
| PRMT1P1        | -0.40 | 3.48E-02 | -0.05 | 7.89E-01 |
| RNU6-745P      | 0.29  | 1.33E-01 | -0.05 | 7.89E-01 |
| RP11-1017G21.6 | -0.07 | 7.36E-01 | -0.05 | 7.89E-01 |
| RP11-1246C19.1 | -0.18 | 3.66E-01 | -0.05 | 7.89E-01 |
| RP11-139H15.6  | -0.12 | 5.53E-01 | -0.05 | 7.89E-01 |
| RP11-211C9.1   | -0.49 | 8.49E-03 | 0.05  | 7.89E-01 |
| RP11-22B23.2   | 0.12  | 5.39E-01 | 0.05  | 7.89E-01 |
| RP11-267N12.2  | -0.18 | 3.65E-01 | 0.05  | 7.89E-01 |
| RP11-2J18.1    | -0.31 | 1.08E-01 | -0.05 | 7.89E-01 |
| RP11-435B5.4   | -0.11 | 5.89E-01 | 0.05  | 7.89E-01 |
| RP11-739P1.2   | 0.11  | 5.82E-01 | -0.05 | 7.89E-01 |
| RP11-96D1.3    | 0.17  | 3.93E-01 | -0.05 | 7.89E-01 |
| RP5-882O7.1    | 0.03  | 8.89E-01 | -0.05 | 7.89E-01 |
| RPAIN          | -0.24 | 2.18E-01 | -0.05 | 7.89E-01 |
| RPL8           | 0.03  | 8.82E-01 | 0.05  | 7.89E-01 |
| SDAD1          | 0.25  | 2.01E-01 | -0.05 | 7.89E-01 |
| SLC25A52       | -0.48 | 8.97E-03 | -0.05 | 7.89E-01 |
| SMIM10L2A      | -0.20 | 3.05E-01 | -0.05 | 7.89E-01 |
| SNORA2A        | 0.18  | 3.60E-01 | 0.05  | 7.89E-01 |
| SNRPN          | -0.27 | 1.65E-01 | -0.05 | 7.89E-01 |
| SNX13          | 0.20  | 3.11E-01 | 0.05  | 7.89E-01 |
| SRXN1          | 0.31  | 1.13E-01 | -0.05 | 7.89E-01 |
| TYRO3          | 0.06  | 7.79E-01 | 0.05  | 7.89E-01 |
| AP003025.2     | 0.06  | 7.52E-01 | 0.05  | 7.90E-01 |
| APH1B          | 0.05  | 7.82E-01 | 0.05  | 7.90E-01 |
| ASGR2          | -0.17 | 3.96E-01 | 0.05  | 7.90E-01 |
| BOP1           | 0.13  | 5.10E-01 | 0.05  | 7.90E-01 |
| BTNL2          | -0.11 | 5.78E-01 | 0.05  | 7.90E-01 |
| CIDCEP         | -0.16 | 4.29E-01 | -0.05 | 7.90E-01 |
| CMAS           | 0.21  | 2.95E-01 | 0.05  | 7.90E-01 |
| CTC-277H1.6    | 0.03  | 8.95E-01 | -0.05 | 7.90E-01 |
| CTD-2228K2.7   | -0.16 | 4.10E-01 | 0.05  | 7.90E-01 |
| DZIP1          | 0.17  | 3.83E-01 | 0.05  | 7.90E-01 |
| FAM65B         | 0.14  | 4.66E-01 | 0.05  | 7.90E-01 |
| FTH1P8         | 0.12  | 5.35E-01 | 0.05  | 7.90E-01 |
| HOKK1          | -0.14 | 4.86E-01 | -0.05 | 7.90E-01 |
| HSPE1P8        | 0.09  | 6.54E-01 | -0.05 | 7.90E-01 |
| KDELR1         | 0.10  | 6.23E-01 | 0.05  | 7.90E-01 |
| LINC01122      | -0.10 | 6.13E-01 | -0.05 | 7.90E-01 |
| LYPLA2         | 0.24  | 2.11E-01 | 0.05  | 7.90E-01 |
| MMD            | -0.45 | 1.73E-02 | 0.05  | 7.90E-01 |
| NALCN-AS1      | -0.08 | 6.80E-01 | 0.05  | 7.90E-01 |
| NOD1           | -0.09 | 6.40E-01 | 0.05  | 7.90E-01 |
| PIP5K1B        | -0.36 | 6.24E-02 | 0.05  | 7.90E-01 |
| PPIAP10        | 0.21  | 2.85E-01 | -0.05 | 7.90E-01 |
| RN7SKP78       | 0.08  | 6.98E-01 | -0.05 | 7.90E-01 |
| RNU6-652P      | 0.04  | 8.56E-01 | 0.05  | 7.90E-01 |

|                |       |          |       |          |
|----------------|-------|----------|-------|----------|
| RP1-274L7.4    | -0.25 | 1.97E-01 | 0.05  | 7.90E-01 |
| RP11-146G7.2   | 0.07  | 7.33E-01 | -0.05 | 7.90E-01 |
| RP11-160O5.1   | -0.51 | 5.18E-03 | 0.05  | 7.90E-01 |
| RP11-235E17.4  | 0.10  | 6.15E-01 | 0.05  | 7.90E-01 |
| RP11-270M14.4  | -0.40 | 3.53E-02 | 0.05  | 7.90E-01 |
| RP11-274J7.3   | -0.43 | 2.31E-02 | -0.05 | 7.90E-01 |
| RP11-498M5.2   | 0.17  | 4.00E-01 | -0.05 | 7.90E-01 |
| RP11-701H24.5  | -0.14 | 4.75E-01 | -0.05 | 7.90E-01 |
| RP6-109B7.2    | 0.26  | 1.80E-01 | -0.05 | 7.90E-01 |
| RPL36AP13      | 0.13  | 4.98E-01 | 0.05  | 7.90E-01 |
| SS18           | 0.22  | 2.66E-01 | 0.05  | 7.90E-01 |
| STAM           | 0.12  | 5.47E-01 | 0.05  | 7.90E-01 |
| SVIL-AS1       | 0.25  | 2.08E-01 | 0.05  | 7.90E-01 |
| UPF3A          | -0.22 | 2.70E-01 | 0.05  | 7.90E-01 |
| YWHABP2        | -0.01 | 9.58E-01 | 0.05  | 7.90E-01 |
| CNR2           | 0.03  | 8.90E-01 | -0.05 | 7.91E-01 |
| ERICH6         | -0.16 | 4.02E-01 | -0.05 | 7.91E-01 |
| GSN            | 0.06  | 7.47E-01 | -0.05 | 7.91E-01 |
| MAPK1IP1L      | 0.09  | 6.50E-01 | -0.05 | 7.91E-01 |
| MYL6           | -0.03 | 8.83E-01 | -0.05 | 7.91E-01 |
| RN7SKP274      | -0.33 | 8.90E-02 | -0.05 | 7.91E-01 |
| RP11-122K13.7  | 0.07  | 7.23E-01 | -0.05 | 7.91E-01 |
| RP11-677M14.7  | 0.56  | 2.08E-03 | -0.05 | 7.91E-01 |
| RP11-723D22.3  | -0.14 | 4.85E-01 | -0.05 | 7.91E-01 |
| RP11-834C11.8  | -0.10 | 6.22E-01 | -0.05 | 7.91E-01 |
| RP3-476K8.4    | -0.26 | 1.88E-01 | -0.05 | 7.91E-01 |
| SUMO4          | -0.16 | 4.23E-01 | -0.05 | 7.91E-01 |
| UBXN2B         | 0.00  | 9.86E-01 | -0.05 | 7.91E-01 |
| YDJC           | 0.09  | 6.55E-01 | -0.05 | 7.91E-01 |
| ABC6           | -0.22 | 2.57E-01 | 0.05  | 7.91E-01 |
| AC084082.3     | 0.15  | 4.58E-01 | 0.05  | 7.91E-01 |
| AL021917.1     | 0.03  | 8.71E-01 | 0.05  | 7.91E-01 |
| ARID1B         | -0.11 | 5.76E-01 | 0.05  | 7.91E-01 |
| ARPC1A         | 0.13  | 5.19E-01 | 0.05  | 7.91E-01 |
| C2CD4B         | 0.11  | 5.71E-01 | 0.05  | 7.91E-01 |
| CCNJP2         | 0.02  | 9.04E-01 | 0.05  | 7.91E-01 |
| FKBPL          | 0.17  | 3.86E-01 | 0.05  | 7.91E-01 |
| LLNLR-268E12.1 | -0.03 | 8.81E-01 | 0.05  | 7.91E-01 |
| MRPL45         | 0.18  | 3.48E-01 | 0.05  | 7.91E-01 |
| POLE2          | 0.01  | 9.54E-01 | 0.05  | 7.91E-01 |
| PRKACB         | 0.13  | 5.26E-01 | 0.05  | 7.91E-01 |
| RN7SL37P       | -0.05 | 7.94E-01 | 0.05  | 7.91E-01 |
| RP11-133K1.9   | 0.18  | 3.52E-01 | 0.05  | 7.91E-01 |
| RP11-401E9.3   | -0.14 | 4.87E-01 | 0.05  | 7.91E-01 |
| RP11-933H2.4   | -0.16 | 4.16E-01 | 0.05  | 7.91E-01 |
| RPS7P10        | -0.21 | 2.93E-01 | 0.05  | 7.91E-01 |
| SNUPN          | 0.22  | 2.71E-01 | 0.05  | 7.91E-01 |

|               |       |          |       |          |
|---------------|-------|----------|-------|----------|
| UBR2          | -0.17 | 3.90E-01 | 0.05  | 7.91E-01 |
| AMD1          | 0.05  | 8.00E-01 | -0.05 | 7.92E-01 |
| AP000223.42   | -0.30 | 1.16E-01 | -0.05 | 7.92E-01 |
| ATG10         | -0.09 | 6.58E-01 | -0.05 | 7.92E-01 |
| CRYAB         | -0.01 | 9.67E-01 | -0.05 | 7.92E-01 |
| CTC-529G1.1   | 0.23  | 2.48E-01 | -0.05 | 7.92E-01 |
| DNAJA2        | 0.12  | 5.54E-01 | -0.05 | 7.92E-01 |
| EIF4E         | 0.29  | 1.36E-01 | -0.05 | 7.92E-01 |
| ELK1          | 0.20  | 3.02E-01 | -0.05 | 7.92E-01 |
| FAM149A       | -0.10 | 6.31E-01 | -0.05 | 7.92E-01 |
| FAM86C2P      | 0.11  | 5.88E-01 | -0.05 | 7.92E-01 |
| FLJ21408      | -0.11 | 5.72E-01 | -0.05 | 7.92E-01 |
| G31252        | 0.02  | 9.02E-01 | -0.05 | 7.92E-01 |
| GTF2IP14      | -0.03 | 8.99E-01 | -0.05 | 7.92E-01 |
| IL1RAP        | 0.34  | 7.66E-02 | -0.05 | 7.92E-01 |
| RNF11B        | -0.39 | 3.76E-02 | -0.05 | 7.92E-01 |
| RP11-304F15.6 | -0.15 | 4.55E-01 | -0.05 | 7.92E-01 |
| RP11-69I8.3   | -0.13 | 5.11E-01 | -0.05 | 7.92E-01 |
| RP11-762I7.4  | -0.11 | 5.92E-01 | -0.05 | 7.92E-01 |
| RP11-92F20.1  | -0.18 | 3.58E-01 | -0.05 | 7.92E-01 |
| RPL13P4       | -0.08 | 6.79E-01 | -0.05 | 7.92E-01 |
| SND1          | 0.07  | 7.05E-01 | -0.05 | 7.92E-01 |
| TBX5          | -0.06 | 7.67E-01 | -0.05 | 7.92E-01 |
| TM7SF2        | 0.06  | 7.59E-01 | -0.05 | 7.92E-01 |
| ZNF131        | 0.33  | 8.16E-02 | -0.05 | 7.92E-01 |
| AP001437.1    | -0.25 | 2.03E-01 | 0.05  | 7.92E-01 |
| CBY3          | -0.23 | 2.37E-01 | 0.05  | 7.92E-01 |
| CCPG1         | -0.13 | 4.97E-01 | 0.05  | 7.92E-01 |
| DGCR11        | 0.25  | 2.03E-01 | 0.05  | 7.92E-01 |
| RP11-172F4.2  | 0.06  | 7.66E-01 | 0.05  | 7.92E-01 |
| RP11-374A4.1  | -0.18 | 3.69E-01 | 0.05  | 7.92E-01 |
| RP11-467K18.2 | -0.05 | 8.12E-01 | 0.05  | 7.92E-01 |
| RP11-484N16.1 | -0.17 | 3.76E-01 | 0.05  | 7.92E-01 |
| RP3-406P24.3  | 0.06  | 7.70E-01 | 0.05  | 7.92E-01 |
| RPL15P3       | 0.23  | 2.46E-01 | 0.05  | 7.92E-01 |
| TMEM30A       | 0.12  | 5.38E-01 | 0.05  | 7.92E-01 |
| TRMT112       | 0.15  | 4.52E-01 | 0.05  | 7.92E-01 |
| ZNF346-IT1    | -0.06 | 7.55E-01 | 0.05  | 7.92E-01 |
| ZNF724P       | 0.11  | 5.78E-01 | 0.05  | 7.92E-01 |
| AC006126.4    | -0.05 | 8.10E-01 | -0.05 | 7.94E-01 |
| AC012146.7    | 0.14  | 4.75E-01 | 0.05  | 7.94E-01 |
| AP000462.2    | 0.00  | 9.87E-01 | 0.05  | 7.94E-01 |
| ARF4-AS1      | 0.03  | 8.87E-01 | 0.05  | 7.94E-01 |
| ASS1P2        | 0.10  | 6.29E-01 | 0.05  | 7.94E-01 |
| C11orf80      | 0.03  | 8.88E-01 | 0.05  | 7.94E-01 |
| C1orf106      | 0.03  | 8.75E-01 | 0.05  | 7.94E-01 |
| CHCHD2P2      | 0.10  | 6.19E-01 | -0.05 | 7.94E-01 |

|                 |       |          |       |          |
|-----------------|-------|----------|-------|----------|
| COL6A4P1        | -0.14 | 4.70E-01 | 0.05  | 7.94E-01 |
| CTD-2012K14.5   | 0.00  | 9.96E-01 | 0.05  | 7.94E-01 |
| CTD-2307P3.1    | 0.30  | 1.18E-01 | -0.05 | 7.94E-01 |
| CTD-3065B20.2   | -0.23 | 2.37E-01 | -0.05 | 7.94E-01 |
| CYFIP2          | 0.09  | 6.49E-01 | -0.05 | 7.94E-01 |
| DHH             | -0.39 | 3.89E-02 | 0.05  | 7.94E-01 |
| ELAC1           | 0.19  | 3.30E-01 | 0.05  | 7.94E-01 |
| EME1            | -0.02 | 9.04E-01 | -0.05 | 7.94E-01 |
| FLT4            | -0.01 | 9.63E-01 | 0.05  | 7.94E-01 |
| G33271          | 0.17  | 4.00E-01 | 0.05  | 7.94E-01 |
| GPOR1           | 0.06  | 7.68E-01 | 0.05  | 7.94E-01 |
| HIST1H2AB       | 0.00  | 9.85E-01 | 0.05  | 7.94E-01 |
| IKZF4           | 0.07  | 7.18E-01 | 0.05  | 7.94E-01 |
| IMPA1           | 0.19  | 3.39E-01 | -0.05 | 7.94E-01 |
| ISCU            | -0.10 | 6.14E-01 | -0.05 | 7.94E-01 |
| LZIC            | -0.11 | 5.84E-01 | 0.05  | 7.94E-01 |
| MADD            | -0.09 | 6.51E-01 | 0.05  | 7.94E-01 |
| MTHFSD          | -0.32 | 9.74E-02 | 0.05  | 7.94E-01 |
| PARP1           | 0.02  | 9.12E-01 | 0.05  | 7.94E-01 |
| RASGRF1         | 0.14  | 4.72E-01 | -0.05 | 7.94E-01 |
| RBMS2           | -0.10 | 6.19E-01 | 0.05  | 7.94E-01 |
| RCL1            | 0.32  | 9.27E-02 | -0.05 | 7.94E-01 |
| RNU6-828P       | -0.03 | 8.98E-01 | 0.05  | 7.94E-01 |
| RP1-283E3.8     | -0.27 | 1.61E-01 | -0.05 | 7.94E-01 |
| RP11-311B14.1   | -0.18 | 3.46E-01 | -0.05 | 7.94E-01 |
| RP11-420A21.1   | -0.08 | 6.96E-01 | -0.05 | 7.94E-01 |
| RP11-44N11.1    | -0.20 | 3.06E-01 | 0.05  | 7.94E-01 |
| RP11-461O7.1    | 0.02  | 9.12E-01 | 0.05  | 7.94E-01 |
| RP11-523O18.7   | 0.04  | 8.55E-01 | -0.05 | 7.94E-01 |
| RP11-747H7.3    | 0.17  | 3.96E-01 | 0.05  | 7.94E-01 |
| RP4-612C19.1    | -0.45 | 1.53E-02 | 0.05  | 7.94E-01 |
| RPL23A          | 0.15  | 4.54E-01 | 0.05  | 7.94E-01 |
| RPL5P13         | -0.05 | 7.97E-01 | 0.05  | 7.94E-01 |
| RPS2P5          | -0.34 | 8.08E-02 | 0.05  | 7.94E-01 |
| SERTAD3         | -0.06 | 7.59E-01 | -0.05 | 7.94E-01 |
| SLTM            | 0.10  | 6.19E-01 | 0.05  | 7.94E-01 |
| SPRED3          | -0.18 | 3.48E-01 | 0.05  | 7.94E-01 |
| XLOC_013942     | -0.10 | 5.99E-01 | 0.05  | 7.94E-01 |
| XX-DJ76P10__A.2 | -0.33 | 8.51E-02 | -0.05 | 7.94E-01 |
| ZBTB48          | 0.30  | 1.22E-01 | 0.05  | 7.94E-01 |
| ZNF774          | 0.20  | 3.20E-01 | 0.05  | 7.94E-01 |
| AC099048.1      | 0.29  | 1.36E-01 | -0.05 | 7.95E-01 |
| CTA-440B3.1     | -0.10 | 6.06E-01 | -0.05 | 7.95E-01 |
| FAM46A          | 0.37  | 5.44E-02 | -0.05 | 7.95E-01 |
| FANK1           | -0.02 | 9.17E-01 | -0.05 | 7.95E-01 |
| HDAC2           | 0.27  | 1.58E-01 | -0.05 | 7.95E-01 |
| HRCT1           | -0.26 | 1.74E-01 | -0.05 | 7.95E-01 |

|                 |       |          |       |          |
|-----------------|-------|----------|-------|----------|
| KLHL41          | -0.30 | 1.27E-01 | -0.05 | 7.95E-01 |
| RP11-266K4.14   | -0.33 | 8.21E-02 | -0.05 | 7.95E-01 |
| RP11-288E14.2   | 0.18  | 3.69E-01 | -0.05 | 7.95E-01 |
| RP11-43F13.4    | -0.04 | 8.21E-01 | -0.05 | 7.95E-01 |
| RP3-388E23.2    | -0.10 | 6.00E-01 | -0.05 | 7.95E-01 |
| SNRPE           | 0.04  | 8.35E-01 | -0.05 | 7.95E-01 |
| TRIM52          | 0.07  | 7.25E-01 | -0.05 | 7.95E-01 |
| WBSCR22         | 0.22  | 2.51E-01 | -0.05 | 7.95E-01 |
| ZFAT            | 0.11  | 5.92E-01 | -0.05 | 7.95E-01 |
| AC007036.4      | 0.00  | 9.89E-01 | 0.05  | 7.95E-01 |
| BLOC1S6         | 0.38  | 4.51E-02 | 0.05  | 7.95E-01 |
| BTF3P7          | -0.29 | 1.36E-01 | 0.05  | 7.95E-01 |
| C11orf31        | 0.08  | 6.76E-01 | 0.05  | 7.95E-01 |
| CACNA1D         | -0.19 | 3.38E-01 | 0.05  | 7.95E-01 |
| DBNDD2          | -0.07 | 7.24E-01 | 0.05  | 7.95E-01 |
| MTCO2P12        | 0.01  | 9.51E-01 | 0.05  | 7.95E-01 |
| RP11-53B2.1     | -0.04 | 8.36E-01 | 0.05  | 7.95E-01 |
| RP4-806M20.3    | 0.03  | 8.77E-01 | 0.05  | 7.95E-01 |
| RP5-1092A11.2   | 0.17  | 3.76E-01 | 0.05  | 7.95E-01 |
| SLC25A15        | 0.30  | 1.22E-01 | 0.05  | 7.95E-01 |
| SLC6A9          | 0.08  | 6.77E-01 | 0.05  | 7.95E-01 |
| SOCS2-AS1       | -0.30 | 1.23E-01 | 0.05  | 7.95E-01 |
| TPSAB1          | 0.17  | 3.82E-01 | 0.05  | 7.95E-01 |
| TRAV8-6         | 0.18  | 3.49E-01 | 0.05  | 7.95E-01 |
| XPR1            | 0.04  | 8.27E-01 | 0.05  | 7.95E-01 |
| AC093382.1      | 0.17  | 3.92E-01 | 0.05  | 7.96E-01 |
| ADHFE1          | -0.26 | 1.86E-01 | 0.05  | 7.96E-01 |
| CADM3-AS1       | -0.06 | 7.77E-01 | -0.05 | 7.96E-01 |
| CDC42EP5        | 0.35  | 6.75E-02 | -0.05 | 7.96E-01 |
| CLTB            | 0.09  | 6.58E-01 | 0.05  | 7.96E-01 |
| CRB3            | -0.07 | 7.42E-01 | -0.05 | 7.96E-01 |
| CSRP3           | -0.23 | 2.42E-01 | 0.05  | 7.96E-01 |
| CTA-363E6.2     | -0.12 | 5.41E-01 | 0.05  | 7.96E-01 |
| DAPL1           | 0.13  | 4.99E-01 | 0.05  | 7.96E-01 |
| DNAH17-AS1      | 0.11  | 5.71E-01 | -0.05 | 7.96E-01 |
| EBNA1BP2        | 0.10  | 5.97E-01 | -0.05 | 7.96E-01 |
| ENO1P3          | -0.11 | 5.85E-01 | -0.05 | 7.96E-01 |
| EXO1            | 0.07  | 7.05E-01 | -0.05 | 7.96E-01 |
| G22214          | -0.05 | 7.94E-01 | 0.05  | 7.96E-01 |
| GGT2            | 0.07  | 7.16E-01 | 0.05  | 7.96E-01 |
| GSX2            | 0.08  | 7.04E-01 | 0.05  | 7.96E-01 |
| HKDC1           | 0.32  | 9.96E-02 | 0.05  | 7.96E-01 |
| KDM1A           | 0.14  | 4.73E-01 | 0.05  | 7.96E-01 |
| KRT41P          | 0.21  | 2.95E-01 | -0.05 | 7.96E-01 |
| LINC01191       | -0.02 | 9.16E-01 | -0.05 | 7.96E-01 |
| LL22NC03-86G7.1 | 0.04  | 8.49E-01 | 0.05  | 7.96E-01 |
| MAPT            | -0.11 | 5.80E-01 | 0.05  | 7.96E-01 |

|                |       |          |       |          |
|----------------|-------|----------|-------|----------|
| PLPPR1         | -0.16 | 4.20E-01 | 0.05  | 7.96E-01 |
| RBM17P4        | -0.11 | 5.79E-01 | -0.05 | 7.96E-01 |
| RCOR1          | 0.20  | 3.04E-01 | -0.05 | 7.96E-01 |
| RNU6-1112P     | -0.24 | 2.24E-01 | -0.05 | 7.96E-01 |
| RP11-1007O24.2 | -0.04 | 8.38E-01 | -0.05 | 7.96E-01 |
| RP11-177C12.1  | 0.17  | 3.95E-01 | -0.05 | 7.96E-01 |
| RP11-383C6.2   | -0.27 | 1.69E-01 | 0.05  | 7.96E-01 |
| RP11-626G11.6  | 0.28  | 1.48E-01 | 0.05  | 7.96E-01 |
| RP11-732M18.2  | -0.09 | 6.65E-01 | -0.05 | 7.96E-01 |
| RP11-767N6.2   | -0.28 | 1.48E-01 | -0.05 | 7.96E-01 |
| RP3-402G11.27  | 0.13  | 5.07E-01 | 0.05  | 7.96E-01 |
| S100A2         | 0.01  | 9.69E-01 | 0.05  | 7.96E-01 |
| TSPAN2         | -0.06 | 7.58E-01 | -0.05 | 7.96E-01 |
| UHRF2P1        | 0.13  | 5.25E-01 | 0.05  | 7.96E-01 |
| YAP1P1         | -0.04 | 8.21E-01 | -0.05 | 7.96E-01 |
| ZUFSP          | 0.24  | 2.21E-01 | -0.05 | 7.96E-01 |
| ANXA7          | 0.04  | 8.50E-01 | 0.05  | 7.97E-01 |
| C2orf72        | 0.13  | 5.18E-01 | 0.05  | 7.97E-01 |
| CGGBP1         | 0.08  | 6.82E-01 | 0.05  | 7.97E-01 |
| DCTN3          | -0.07 | 7.18E-01 | 0.05  | 7.97E-01 |
| NSD1           | 0.01  | 9.57E-01 | 0.05  | 7.97E-01 |
| PGD            | 0.32  | 9.81E-02 | 0.05  | 7.97E-01 |
| RP11-25G10.2   | 0.18  | 3.59E-01 | 0.05  | 7.97E-01 |
| RP11-326L2.1   | -0.01 | 9.54E-01 | 0.05  | 7.97E-01 |
| RP11-476C8.2   | 0.12  | 5.37E-01 | 0.05  | 7.97E-01 |
| RP11-6I2.3     | -0.11 | 5.71E-01 | 0.05  | 7.97E-01 |
| RP11-74E22.8   | -0.29 | 1.35E-01 | 0.05  | 7.97E-01 |
| RP5-884C9.2    | -0.12 | 5.34E-01 | 0.05  | 7.97E-01 |
| SLC25A42       | -0.01 | 9.70E-01 | 0.05  | 7.97E-01 |
| SMAD3          | 0.25  | 2.06E-01 | 0.05  | 7.97E-01 |
| UMPS           | 0.15  | 4.37E-01 | 0.05  | 7.97E-01 |
| ZNF438         | -0.17 | 3.86E-01 | 0.05  | 7.97E-01 |
| AC004951.6     | 0.08  | 6.80E-01 | -0.05 | 7.97E-01 |
| AK3P3          | 0.05  | 7.84E-01 | -0.05 | 7.97E-01 |
| C8orf33        | 0.02  | 9.32E-01 | -0.05 | 7.97E-01 |
| CTC-435M10.12  | 0.19  | 3.39E-01 | -0.05 | 7.97E-01 |
| DUS3L          | -0.10 | 6.00E-01 | -0.05 | 7.97E-01 |
| GPR62          | 0.08  | 6.80E-01 | -0.05 | 7.97E-01 |
| KRTAP4-6       | -0.26 | 1.89E-01 | -0.05 | 7.97E-01 |
| NCKAP5-IT1     | 0.12  | 5.38E-01 | -0.05 | 7.97E-01 |
| NCR1           | 0.16  | 4.09E-01 | -0.05 | 7.97E-01 |
| PSORS1C1       | 0.17  | 3.73E-01 | -0.05 | 7.97E-01 |
| RNU6-638P      | -0.10 | 6.29E-01 | -0.05 | 7.97E-01 |
| RP11-290F5.1   | 0.24  | 2.23E-01 | -0.05 | 7.97E-01 |
| RP11-439E19.10 | -0.02 | 9.25E-01 | -0.05 | 7.97E-01 |
| RP11-57H14.5   | 0.15  | 4.60E-01 | -0.05 | 7.97E-01 |
| RP11-630D6.5   | 0.06  | 7.53E-01 | -0.05 | 7.97E-01 |

|                      |       |          |       |          |
|----------------------|-------|----------|-------|----------|
| <b>RP11-950C14.3</b> | -0.29 | 1.30E-01 | -0.05 | 7.97E-01 |
| <b>RP13-204A15.5</b> | -0.29 | 1.39E-01 | -0.05 | 7.97E-01 |
| <b>RPL21P75</b>      | 0.34  | 7.44E-02 | -0.05 | 7.97E-01 |
| <b>RPS6KA2-IT1</b>   | -0.10 | 6.23E-01 | -0.05 | 7.97E-01 |
| <b>RRP7A</b>         | 0.34  | 7.59E-02 | -0.05 | 7.97E-01 |
| <b>TMCO5A</b>        | -0.08 | 6.87E-01 | -0.05 | 7.97E-01 |
| <b>VTI1A</b>         | -0.04 | 8.54E-01 | -0.05 | 7.97E-01 |
| <b>ZC3H6</b>         | -0.18 | 3.72E-01 | -0.05 | 7.97E-01 |
| <b>ZNF330</b>        | 0.05  | 7.99E-01 | -0.05 | 7.97E-01 |
| <b>ZNF436-AS1</b>    | -0.28 | 1.52E-01 | -0.05 | 7.97E-01 |
| <b>ZNF518A</b>       | -0.08 | 6.84E-01 | -0.05 | 7.97E-01 |
| <b>AAMP</b>          | 0.12  | 5.53E-01 | -0.05 | 7.98E-01 |
| <b>AC007016.3</b>    | -0.15 | 4.60E-01 | -0.05 | 7.98E-01 |
| <b>CELF2</b>         | -0.34 | 7.27E-02 | -0.05 | 7.98E-01 |
| <b>FCF1P7</b>        | -0.26 | 1.76E-01 | -0.05 | 7.98E-01 |
| <b>G5246</b>         | -0.18 | 3.57E-01 | -0.05 | 7.98E-01 |
| <b>RP11-109D20.1</b> | 0.27  | 1.58E-01 | -0.05 | 7.98E-01 |
| <b>RP11-538D16.3</b> | 0.15  | 4.60E-01 | -0.05 | 7.98E-01 |
| <b>TCEB1P33</b>      | 0.33  | 8.64E-02 | -0.05 | 7.98E-01 |
| <b>TFAM</b>          | 0.32  | 9.45E-02 | -0.05 | 7.98E-01 |
| <b>TNFRSF25</b>      | -0.17 | 3.79E-01 | -0.05 | 7.98E-01 |
| <b>TNPO1P1</b>       | -0.06 | 7.54E-01 | -0.05 | 7.98E-01 |
| <b>USP2-AS1</b>      | 0.20  | 3.12E-01 | -0.05 | 7.98E-01 |
| <b>ABHD15</b>        | 0.19  | 3.26E-01 | 0.05  | 7.98E-01 |
| <b>GAS1</b>          | -0.09 | 6.39E-01 | 0.05  | 7.98E-01 |
| <b>GTF3C2</b>        | 0.38  | 4.74E-02 | 0.05  | 7.98E-01 |
| <b>HLX</b>           | -0.04 | 8.55E-01 | 0.05  | 7.98E-01 |
| <b>LRRC47</b>        | 0.21  | 2.74E-01 | 0.05  | 7.98E-01 |
| <b>OGT</b>           | 0.01  | 9.40E-01 | 0.05  | 7.98E-01 |
| <b>PROS1</b>         | 0.13  | 5.13E-01 | 0.05  | 7.98E-01 |
| <b>RP1-90J20.8</b>   | -0.09 | 6.58E-01 | 0.05  | 7.98E-01 |
| <b>RP11-118E18.1</b> | 0.00  | 9.82E-01 | 0.05  | 7.98E-01 |
| <b>RP11-50D16.4</b>  | -0.08 | 6.80E-01 | 0.05  | 7.98E-01 |
| <b>SLX4</b>          | 0.11  | 5.86E-01 | 0.05  | 7.98E-01 |
| <b>UBE2D1</b>        | 0.18  | 3.70E-01 | 0.05  | 7.98E-01 |
| <b>AL590452.1</b>    | -0.23 | 2.36E-01 | -0.05 | 7.99E-01 |
| <b>BCL7C</b>         | 0.04  | 8.37E-01 | -0.05 | 7.99E-01 |
| <b>CDK8</b>          | -0.05 | 8.17E-01 | 0.05  | 7.99E-01 |
| <b>COL11A2</b>       | -0.08 | 6.77E-01 | 0.05  | 7.99E-01 |
| <b>COPS5</b>         | -0.06 | 7.77E-01 | -0.05 | 7.99E-01 |
| <b>CTD-2006C1.2</b>  | -0.18 | 3.57E-01 | 0.05  | 7.99E-01 |
| <b>EFCAB13</b>       | -0.09 | 6.51E-01 | -0.05 | 7.99E-01 |
| <b>ERMARD</b>        | -0.05 | 8.19E-01 | -0.05 | 7.99E-01 |
| <b>FAM126A</b>       | -0.01 | 9.59E-01 | -0.05 | 7.99E-01 |
| <b>FANCD2</b>        | 0.03  | 8.73E-01 | -0.05 | 7.99E-01 |
| <b>G25119</b>        | -0.35 | 6.44E-02 | 0.05  | 7.99E-01 |
| <b>G33706</b>        | -0.23 | 2.37E-01 | -0.05 | 7.99E-01 |

|                      |       |          |       |          |
|----------------------|-------|----------|-------|----------|
| <b>G3900</b>         | -0.05 | 8.03E-01 | 0.05  | 7.99E-01 |
| <b>G41767</b>        | -0.33 | 9.12E-02 | 0.05  | 7.99E-01 |
| <b>GABPA</b>         | 0.07  | 7.22E-01 | -0.05 | 7.99E-01 |
| <b>GIPC1</b>         | 0.21  | 2.95E-01 | 0.05  | 7.99E-01 |
| <b>HIST1H2AI</b>     | -0.09 | 6.42E-01 | -0.05 | 7.99E-01 |
| <b>LINC00654</b>     | -0.16 | 4.13E-01 | 0.05  | 7.99E-01 |
| <b>MBL1P</b>         | -0.06 | 7.67E-01 | 0.05  | 7.99E-01 |
| <b>MTAPP2</b>        | -0.19 | 3.21E-01 | 0.05  | 7.99E-01 |
| <b>NUP107</b>        | 0.09  | 6.48E-01 | -0.05 | 7.99E-01 |
| <b>RP1-184J9.2</b>   | -0.18 | 3.50E-01 | -0.05 | 7.99E-01 |
| <b>RP11-403H13.1</b> | 0.01  | 9.65E-01 | -0.05 | 7.99E-01 |
| <b>RP11-4B16.1</b>   | 0.00  | 9.99E-01 | 0.05  | 7.99E-01 |
| <b>RP11-571M6.17</b> | 0.07  | 7.21E-01 | 0.05  | 7.99E-01 |
| <b>RP11-665C16.1</b> | -0.23 | 2.29E-01 | 0.05  | 7.99E-01 |
| <b>RP3-523C21.2</b>  | -0.24 | 2.23E-01 | -0.05 | 7.99E-01 |
| <b>RPL7L1P12</b>     | 0.19  | 3.42E-01 | -0.05 | 7.99E-01 |
| <b>RPS6KA4</b>       | 0.10  | 5.98E-01 | 0.05  | 7.99E-01 |
| <b>S100A14</b>       | 0.10  | 6.25E-01 | -0.05 | 7.99E-01 |
| <b>SENP8</b>         | 0.15  | 4.49E-01 | 0.05  | 7.99E-01 |
| <b>SLC39A4</b>       | -0.05 | 8.14E-01 | -0.05 | 7.99E-01 |
| <b>SNORD117</b>      | 0.06  | 7.69E-01 | -0.05 | 7.99E-01 |
| <b>TSN</b>           | 0.09  | 6.58E-01 | -0.05 | 7.99E-01 |
| <b>USP14</b>         | -0.05 | 7.85E-01 | -0.05 | 7.99E-01 |
| <b>XLOC_004054</b>   | 0.15  | 4.35E-01 | 0.05  | 7.99E-01 |
| <b>ZIC2</b>          | 0.08  | 6.75E-01 | -0.05 | 7.99E-01 |
| <b>ZNF426</b>        | 0.24  | 2.15E-01 | 0.05  | 7.99E-01 |
| <b>AC106873.4</b>    | 0.01  | 9.53E-01 | 0.05  | 8.01E-01 |
| <b>AF131215.3</b>    | -0.05 | 7.99E-01 | 0.05  | 8.01E-01 |
| <b>CTB-79E8.3</b>    | -0.04 | 8.25E-01 | 0.05  | 8.01E-01 |
| <b>ELAC2</b>         | 0.12  | 5.48E-01 | 0.05  | 8.01E-01 |
| <b>RBBP9</b>         | -0.02 | 9.01E-01 | 0.05  | 8.01E-01 |
| <b>RNU6-1020P</b>    | -0.21 | 2.89E-01 | 0.05  | 8.01E-01 |
| <b>RP11-83B20.1</b>  | -0.43 | 2.36E-02 | 0.05  | 8.01E-01 |
| <b>SLC40A1</b>       | 0.26  | 1.77E-01 | 0.05  | 8.01E-01 |
| <b>XLOC_012057</b>   | 0.03  | 8.70E-01 | 0.05  | 8.01E-01 |
| <b>B4GALT2</b>       | -0.03 | 8.78E-01 | -0.05 | 8.01E-01 |
| <b>C8orf34</b>       | -0.13 | 5.07E-01 | -0.05 | 8.01E-01 |
| <b>CDH16</b>         | -0.18 | 3.67E-01 | -0.05 | 8.01E-01 |
| <b>ERP44</b>         | 0.10  | 6.26E-01 | -0.05 | 8.01E-01 |
| <b>FCHO1</b>         | -0.21 | 2.80E-01 | -0.05 | 8.01E-01 |
| <b>HIST2H3DP1</b>    | 0.03  | 8.80E-01 | -0.05 | 8.01E-01 |
| <b>LENG8</b>         | -0.09 | 6.54E-01 | -0.05 | 8.01E-01 |
| <b>NEFM</b>          | 0.06  | 7.61E-01 | -0.05 | 8.01E-01 |
| <b>PDXP</b>          | -0.06 | 7.71E-01 | -0.05 | 8.01E-01 |
| <b>PTPRT</b>         | -0.15 | 4.35E-01 | -0.05 | 8.01E-01 |
| <b>RP11-380M21.4</b> | 0.03  | 8.95E-01 | -0.05 | 8.01E-01 |
| <b>RP11-409K20.6</b> | 0.21  | 2.84E-01 | -0.05 | 8.01E-01 |



|               |       |          |       |          |
|---------------|-------|----------|-------|----------|
| RP11-67C2.2   | -0.19 | 3.44E-01 | -0.05 | 8.01E-01 |
| RP11-768B22.2 | 0.36  | 6.37E-02 | -0.05 | 8.01E-01 |
| RP11-837J7.4  | -0.01 | 9.59E-01 | -0.05 | 8.01E-01 |
| RP3-468K18.6  | -0.09 | 6.40E-01 | -0.05 | 8.01E-01 |
| SNRPGP2       | -0.25 | 2.08E-01 | -0.05 | 8.01E-01 |
| TRMU          | 0.00  | 9.85E-01 | -0.05 | 8.01E-01 |
| TTC33         | 0.08  | 7.03E-01 | -0.05 | 8.01E-01 |
| ZNF449        | 0.15  | 4.60E-01 | -0.05 | 8.01E-01 |
| AC008592.7    | -0.01 | 9.71E-01 | -0.05 | 8.02E-01 |
| ALG10         | 0.16  | 4.04E-01 | -0.05 | 8.02E-01 |
| AMN           | 0.25  | 2.01E-01 | -0.05 | 8.02E-01 |
| CCL28         | 0.07  | 7.09E-01 | -0.05 | 8.02E-01 |
| CLEC2L        | 0.35  | 7.08E-02 | -0.05 | 8.02E-01 |
| CLIC4         | 0.02  | 9.10E-01 | -0.05 | 8.02E-01 |
| G33346        | -0.13 | 4.98E-01 | -0.05 | 8.02E-01 |
| G33807        | -0.06 | 7.57E-01 | -0.05 | 8.02E-01 |
| G5909         | -0.09 | 6.58E-01 | -0.05 | 8.02E-01 |
| GPN1          | -0.02 | 9.09E-01 | -0.05 | 8.02E-01 |
| GRIN2B        | -0.32 | 9.96E-02 | -0.05 | 8.02E-01 |
| LGALS12       | -0.09 | 6.51E-01 | -0.05 | 8.02E-01 |
| MT-TS2        | 0.10  | 6.08E-01 | -0.05 | 8.02E-01 |
| NKAIN2        | -0.09 | 6.35E-01 | -0.05 | 8.02E-01 |
| PDF           | 0.21  | 2.83E-01 | -0.05 | 8.02E-01 |
| RP11-223P11.3 | -0.39 | 4.25E-02 | -0.05 | 8.02E-01 |
| RPL5P23       | 0.06  | 7.44E-01 | -0.05 | 8.02E-01 |
| TEX30         | 0.03  | 8.75E-01 | -0.05 | 8.02E-01 |
| TRAJ23        | 0.02  | 9.01E-01 | -0.05 | 8.02E-01 |
| WDR12         | 0.20  | 3.05E-01 | -0.05 | 8.02E-01 |
| YIPF4         | 0.31  | 1.10E-01 | -0.05 | 8.02E-01 |
| ZNF587B       | 0.28  | 1.44E-01 | -0.05 | 8.02E-01 |
| AC010149.4    | 0.10  | 6.15E-01 | 0.05  | 8.02E-01 |
| ADCY4         | -0.37 | 5.48E-02 | 0.05  | 8.02E-01 |
| AP003068.23   | 0.23  | 2.29E-01 | 0.05  | 8.02E-01 |
| CDCA3         | -0.04 | 8.58E-01 | 0.05  | 8.02E-01 |
| CTA-407F11.7  | -0.19 | 3.33E-01 | 0.05  | 8.02E-01 |
| ELK4          | 0.13  | 5.07E-01 | 0.05  | 8.02E-01 |
| GATA1         | -0.02 | 9.21E-01 | 0.05  | 8.02E-01 |
| JTBP1         | -0.17 | 3.99E-01 | 0.05  | 8.02E-01 |
| LIX1L         | -0.14 | 4.64E-01 | 0.05  | 8.02E-01 |
| MCCD1         | 0.25  | 1.96E-01 | 0.05  | 8.02E-01 |
| MRPL12        | 0.12  | 5.43E-01 | 0.05  | 8.02E-01 |
| OLFML1        | -0.21 | 2.95E-01 | 0.05  | 8.02E-01 |
| PARD3-AS1     | 0.08  | 6.81E-01 | 0.05  | 8.02E-01 |
| PEX6          | -0.10 | 6.31E-01 | 0.05  | 8.02E-01 |
| PKP1          | -0.06 | 7.66E-01 | 0.05  | 8.02E-01 |
| RHOB          | -0.06 | 7.61E-01 | 0.05  | 8.02E-01 |
| RP11-384P7.7  | 0.05  | 8.01E-01 | 0.05  | 8.02E-01 |

|               |       |          |       |          |
|---------------|-------|----------|-------|----------|
| RP11-62C3.6   | 0.12  | 5.44E-01 | 0.05  | 8.02E-01 |
| RPSAP15       | -0.14 | 4.72E-01 | 0.05  | 8.02E-01 |
| SCARNA24      | -0.15 | 4.52E-01 | 0.05  | 8.02E-01 |
| SHC4          | -0.10 | 6.04E-01 | 0.05  | 8.02E-01 |
| ST13P10       | -0.25 | 2.03E-01 | 0.05  | 8.02E-01 |
| TPI1P4        | 0.05  | 7.93E-01 | 0.05  | 8.02E-01 |
| XLOC_011506   | -0.37 | 5.14E-02 | 0.05  | 8.02E-01 |
| XXYLT1-AS1    | 0.26  | 1.85E-01 | 0.05  | 8.02E-01 |
| ZRANB2-AS1    | 0.17  | 3.96E-01 | 0.05  | 8.02E-01 |
| AC006042.6    | -0.03 | 8.80E-01 | -0.05 | 8.03E-01 |
| AC133106.2    | -0.25 | 2.06E-01 | -0.05 | 8.03E-01 |
| C10orf131     | 0.08  | 6.76E-01 | -0.05 | 8.03E-01 |
| ENPP7P5       | 0.02  | 9.02E-01 | -0.05 | 8.03E-01 |
| GDI2          | 0.07  | 7.33E-01 | -0.05 | 8.03E-01 |
| HDCC2         | 0.21  | 2.93E-01 | -0.05 | 8.03E-01 |
| HIST2H3D      | -0.09 | 6.62E-01 | -0.05 | 8.03E-01 |
| INPP4A        | 0.24  | 2.28E-01 | -0.05 | 8.03E-01 |
| KRTAP1-5      | -0.16 | 4.14E-01 | -0.05 | 8.03E-01 |
| MFN1          | 0.39  | 4.20E-02 | -0.05 | 8.03E-01 |
| MSANTD1       | 0.09  | 6.32E-01 | -0.05 | 8.03E-01 |
| NOMO3         | -0.02 | 9.15E-01 | -0.05 | 8.03E-01 |
| RNU6-97P      | -0.04 | 8.52E-01 | -0.05 | 8.03E-01 |
| RP11-161I6.2  | -0.09 | 6.57E-01 | -0.05 | 8.03E-01 |
| RP11-196B3.2  | -0.01 | 9.42E-01 | -0.05 | 8.03E-01 |
| RP11-2H3.7    | -0.03 | 8.67E-01 | -0.05 | 8.03E-01 |
| RP11-317N8.3  | 0.09  | 6.34E-01 | -0.05 | 8.03E-01 |
| RP11-373N22.3 | 0.04  | 8.46E-01 | -0.05 | 8.03E-01 |
| RP11-74D7.3   | -0.13 | 4.93E-01 | -0.05 | 8.03E-01 |
| RPL7P25       | -0.06 | 7.58E-01 | -0.05 | 8.03E-01 |
| SLC10A7       | -0.03 | 8.97E-01 | -0.05 | 8.03E-01 |
| SMOC2         | -0.06 | 7.58E-01 | -0.05 | 8.03E-01 |
| ZNF862        | -0.17 | 4.00E-01 | -0.05 | 8.03E-01 |
| ABCC5         | 0.11  | 5.88E-01 | 0.05  | 8.03E-01 |
| B3GNT7        | 0.06  | 7.68E-01 | 0.05  | 8.03E-01 |
| C17orf49      | 0.01  | 9.78E-01 | 0.05  | 8.03E-01 |
| G33789        | 0.09  | 6.38E-01 | 0.05  | 8.03E-01 |
| GSKIP         | -0.06 | 7.45E-01 | 0.05  | 8.03E-01 |
| RNF111        | 0.07  | 7.26E-01 | 0.05  | 8.03E-01 |
| RP11-423E7.1  | -0.02 | 9.21E-01 | 0.05  | 8.03E-01 |
| RP11-531F16.3 | -0.01 | 9.67E-01 | 0.05  | 8.03E-01 |
| RPS14         | 0.09  | 6.38E-01 | 0.05  | 8.03E-01 |
| RPS2P55       | -0.02 | 9.34E-01 | 0.05  | 8.03E-01 |
| SNX3          | 0.01  | 9.49E-01 | 0.05  | 8.03E-01 |
| AC011242.5    | -0.23 | 2.32E-01 | -0.05 | 8.04E-01 |
| AC023590.1    | -0.01 | 9.59E-01 | 0.05  | 8.04E-01 |
| ATAD3B        | -0.02 | 9.01E-01 | -0.05 | 8.04E-01 |
| C1GALT1C1L    | -0.17 | 3.82E-01 | 0.05  | 8.04E-01 |

|                |       |          |       |          |
|----------------|-------|----------|-------|----------|
| CDHR3          | -0.44 | 1.91E-02 | -0.05 | 8.04E-01 |
| DDIAS          | 0.24  | 2.09E-01 | -0.05 | 8.04E-01 |
| DSG2           | -0.01 | 9.76E-01 | -0.05 | 8.04E-01 |
| ECHDC3         | 0.30  | 1.16E-01 | 0.05  | 8.04E-01 |
| FAM104B        | -0.09 | 6.54E-01 | -0.05 | 8.04E-01 |
| FAM157B        | 0.15  | 4.43E-01 | 0.05  | 8.04E-01 |
| FAM89A         | -0.03 | 8.62E-01 | -0.05 | 8.04E-01 |
| FBR5           | 0.19  | 3.33E-01 | 0.05  | 8.04E-01 |
| G28013         | -0.09 | 6.44E-01 | -0.05 | 8.04E-01 |
| GNG5           | 0.11  | 5.64E-01 | -0.05 | 8.04E-01 |
| HIPK3          | 0.13  | 4.98E-01 | -0.05 | 8.04E-01 |
| KRT18P37       | 0.21  | 2.91E-01 | -0.05 | 8.04E-01 |
| LA16c-380A1.2  | -0.19 | 3.40E-01 | -0.05 | 8.04E-01 |
| MRGPRX3        | 0.39  | 4.07E-02 | 0.05  | 8.04E-01 |
| PLA2G12AP1     | 0.11  | 5.68E-01 | -0.05 | 8.04E-01 |
| PRPSAP2        | 0.23  | 2.38E-01 | 0.05  | 8.04E-01 |
| RNU2-27P       | 0.17  | 3.85E-01 | -0.05 | 8.04E-01 |
| RNU2-46P       | 0.06  | 7.61E-01 | -0.05 | 8.04E-01 |
| RP1-206D15.6   | -0.08 | 6.71E-01 | 0.05  | 8.04E-01 |
| RP11-1017G21.3 | -0.09 | 6.66E-01 | 0.05  | 8.04E-01 |
| RP11-107E5.4   | -0.20 | 3.14E-01 | 0.05  | 8.04E-01 |
| RP11-111F5.4   | -0.23 | 2.49E-01 | -0.05 | 8.04E-01 |
| RP11-375N15.2  | -0.32 | 9.78E-02 | -0.05 | 8.04E-01 |
| RP11-756J15.2  | -0.01 | 9.53E-01 | -0.05 | 8.04E-01 |
| RP5-1099C19.2  | -0.18 | 3.47E-01 | -0.05 | 8.04E-01 |
| RPL31P60       | -0.47 | 1.13E-02 | -0.05 | 8.04E-01 |
| SLC12A1        | -0.06 | 7.60E-01 | 0.05  | 8.04E-01 |
| SMIM15         | 0.34  | 7.87E-02 | 0.05  | 8.04E-01 |
| THEMIS3P       | -0.03 | 8.77E-01 | -0.05 | 8.04E-01 |
| TMEM14A        | 0.13  | 5.01E-01 | 0.05  | 8.04E-01 |
| TMTC2          | 0.08  | 7.01E-01 | 0.05  | 8.04E-01 |
| TRPC3          | 0.12  | 5.47E-01 | -0.05 | 8.04E-01 |
| TUBB4A         | -0.21 | 2.82E-01 | -0.05 | 8.04E-01 |
| WDR18          | 0.22  | 2.69E-01 | -0.05 | 8.04E-01 |
| ANO5           | -0.09 | 6.35E-01 | -0.05 | 8.05E-01 |
| APEH           | 0.21  | 2.89E-01 | 0.05  | 8.05E-01 |
| ARSJ           | 0.21  | 2.78E-01 | 0.05  | 8.05E-01 |
| C5orf66-AS2    | -0.15 | 4.49E-01 | -0.05 | 8.05E-01 |
| CCDC84         | -0.22 | 2.59E-01 | -0.05 | 8.05E-01 |
| CHSY3          | -0.22 | 2.53E-01 | -0.05 | 8.05E-01 |
| CTB-181H17.1   | 0.00  | 9.89E-01 | 0.05  | 8.05E-01 |
| CTSK           | -0.11 | 5.76E-01 | 0.05  | 8.05E-01 |
| CXorf21        | 0.09  | 6.37E-01 | 0.05  | 8.05E-01 |
| EME2           | -0.08 | 6.82E-01 | -0.05 | 8.05E-01 |
| G42720         | 0.13  | 4.93E-01 | 0.05  | 8.05E-01 |
| MKI67          | -0.13 | 5.12E-01 | 0.05  | 8.05E-01 |
| OR9I1          | -0.06 | 7.76E-01 | -0.05 | 8.05E-01 |

|                |       |          |       |          |
|----------------|-------|----------|-------|----------|
| P2RX1          | 0.17  | 3.92E-01 | -0.05 | 8.05E-01 |
| PCOLCE         | -0.19 | 3.45E-01 | -0.05 | 8.05E-01 |
| PSMD14         | -0.01 | 9.47E-01 | -0.05 | 8.05E-01 |
| PTPRVP         | -0.23 | 2.49E-01 | -0.05 | 8.05E-01 |
| RP1-278E11.3   | -0.08 | 6.73E-01 | 0.05  | 8.05E-01 |
| RP11-312B8.2   | -0.15 | 4.54E-01 | -0.05 | 8.05E-01 |
| RP11-328C8.2   | -0.09 | 6.33E-01 | -0.05 | 8.05E-01 |
| RP11-33N16.2   | -0.08 | 6.69E-01 | -0.05 | 8.05E-01 |
| RP11-435O5.4   | -0.05 | 7.83E-01 | 0.05  | 8.05E-01 |
| RP11-488C13.5  | 0.21  | 2.75E-01 | -0.05 | 8.05E-01 |
| RP11-492I21.1  | 0.00  | 9.94E-01 | 0.05  | 8.05E-01 |
| RP11-90C4.1    | -0.01 | 9.56E-01 | 0.05  | 8.05E-01 |
| RPL34P22       | -0.13 | 5.17E-01 | -0.05 | 8.05E-01 |
| RPS3A          | 0.07  | 7.26E-01 | -0.05 | 8.05E-01 |
| SLC25A5-AS1    | 0.05  | 8.13E-01 | -0.05 | 8.05E-01 |
| SNAPC1         | 0.08  | 6.72E-01 | -0.05 | 8.05E-01 |
| SNED1          | -0.31 | 1.06E-01 | 0.05  | 8.05E-01 |
| SPARCL1        | -0.05 | 7.87E-01 | 0.05  | 8.05E-01 |
| SYN3           | -0.19 | 3.36E-01 | -0.05 | 8.05E-01 |
| UBE2A          | -0.03 | 8.62E-01 | -0.05 | 8.05E-01 |
| UHL3           | 0.02  | 9.14E-01 | 0.05  | 8.05E-01 |
| AP1G1          | 0.25  | 2.07E-01 | 0.05  | 8.06E-01 |
| CTD-2525I3.6   | 0.01  | 9.66E-01 | 0.05  | 8.06E-01 |
| CWF19L1        | 0.13  | 5.14E-01 | -0.05 | 8.06E-01 |
| CYP4F2         | 0.21  | 2.88E-01 | -0.05 | 8.06E-01 |
| ENPP7P6        | -0.08 | 6.79E-01 | -0.05 | 8.06E-01 |
| EZR-AS1        | -0.27 | 1.57E-01 | 0.05  | 8.06E-01 |
| GIN5           | 0.06  | 7.71E-01 | 0.05  | 8.06E-01 |
| GNA14          | 0.19  | 3.35E-01 | -0.05 | 8.06E-01 |
| GPC3           | -0.05 | 7.83E-01 | -0.05 | 8.06E-01 |
| GS1-251I9.3    | -0.38 | 4.73E-02 | -0.05 | 8.06E-01 |
| HMGB1P7        | -0.11 | 5.71E-01 | -0.05 | 8.06E-01 |
| HMG2P23        | 0.07  | 7.24E-01 | 0.05  | 8.06E-01 |
| LOR            | -0.11 | 5.71E-01 | -0.05 | 8.06E-01 |
| LRRC4B         | 0.00  | 9.83E-01 | 0.05  | 8.06E-01 |
| MRPS28         | 0.27  | 1.57E-01 | -0.05 | 8.06E-01 |
| NOMO1          | 0.12  | 5.57E-01 | -0.05 | 8.06E-01 |
| OR7E2P         | -0.15 | 4.51E-01 | -0.05 | 8.06E-01 |
| PSMA3          | 0.10  | 6.28E-01 | -0.05 | 8.06E-01 |
| RP11-1112G13.3 | -0.07 | 7.05E-01 | -0.05 | 8.06E-01 |
| RP11-112J3.16  | -0.11 | 5.65E-01 | 0.05  | 8.06E-01 |
| RP11-148B6.1   | -0.10 | 6.24E-01 | 0.05  | 8.06E-01 |
| RP11-21B23.1   | -0.11 | 5.77E-01 | 0.05  | 8.06E-01 |
| RP11-344N10.2  | 0.25  | 1.92E-01 | 0.05  | 8.06E-01 |
| RP11-466A19.3  | -0.10 | 6.03E-01 | -0.05 | 8.06E-01 |
| RP11-61A14.4   | -0.06 | 7.58E-01 | 0.05  | 8.06E-01 |
| RP11-650J17.2  | 0.09  | 6.55E-01 | 0.05  | 8.06E-01 |

|                      |       |          |       |          |
|----------------------|-------|----------|-------|----------|
| <b>RP11-817J15.3</b> | 0.04  | 8.55E-01 | 0.05  | 8.06E-01 |
| <b>RP11-973F15.2</b> | 0.01  | 9.48E-01 | -0.05 | 8.06E-01 |
| <b>ZNF652P1</b>      | -0.13 | 5.16E-01 | -0.05 | 8.06E-01 |
| <b>AC003682.16</b>   | -0.21 | 2.92E-01 | -0.05 | 8.08E-01 |
| <b>AC007078.4</b>    | -0.21 | 2.76E-01 | 0.05  | 8.08E-01 |
| <b>ALOX12</b>        | -0.22 | 2.65E-01 | 0.05  | 8.08E-01 |
| <b>AMMECR1-IT1</b>   | 0.00  | 9.99E-01 | 0.05  | 8.08E-01 |
| <b>C5orf22</b>       | 0.00  | 9.92E-01 | -0.05 | 8.08E-01 |
| <b>CDC34</b>         | 0.10  | 5.96E-01 | 0.05  | 8.08E-01 |
| <b>CTB-49A3.5</b>    | 0.07  | 7.29E-01 | 0.05  | 8.08E-01 |
| <b>DNAJC28</b>       | 0.18  | 3.71E-01 | 0.05  | 8.08E-01 |
| <b>ECE2</b>          | 0.11  | 5.88E-01 | -0.05 | 8.08E-01 |
| <b>EP400NL</b>       | 0.11  | 5.76E-01 | -0.05 | 8.08E-01 |
| <b>EXOSC2</b>        | 0.04  | 8.44E-01 | 0.05  | 8.08E-01 |
| <b>GOLGA2</b>        | -0.11 | 5.83E-01 | 0.05  | 8.08E-01 |
| <b>HIST2H2BF</b>     | -0.01 | 9.51E-01 | -0.05 | 8.08E-01 |
| <b>KIFC3</b>         | -0.15 | 4.54E-01 | 0.05  | 8.08E-01 |
| <b>MIR3155A</b>      | 0.12  | 5.29E-01 | 0.05  | 8.08E-01 |
| <b>NDUFA12</b>       | 0.03  | 8.93E-01 | 0.05  | 8.08E-01 |
| <b>P2RX2</b>         | -0.31 | 1.11E-01 | -0.05 | 8.08E-01 |
| <b>RNU6-335P</b>     | -0.07 | 7.13E-01 | -0.05 | 8.08E-01 |
| <b>RP1-167A14.2</b>  | 0.20  | 2.98E-01 | 0.05  | 8.08E-01 |
| <b>RP1-180M12.1</b>  | -0.35 | 6.68E-02 | -0.05 | 8.08E-01 |
| <b>RP11-107F6.4</b>  | 0.07  | 7.10E-01 | -0.05 | 8.08E-01 |
| <b>RP11-166N17.1</b> | 0.11  | 5.74E-01 | -0.05 | 8.08E-01 |
| <b>RP11-166N17.3</b> | 0.03  | 8.65E-01 | 0.05  | 8.08E-01 |
| <b>RP11-171G2.1</b>  | -0.18 | 3.53E-01 | 0.05  | 8.08E-01 |
| <b>RP11-216N14.5</b> | -0.13 | 5.00E-01 | -0.05 | 8.08E-01 |
| <b>RP11-305O6.3</b>  | -0.18 | 3.60E-01 | -0.05 | 8.08E-01 |
| <b>RP11-354B3.1</b>  | 0.13  | 5.07E-01 | -0.05 | 8.08E-01 |
| <b>RP11-420B22.1</b> | -0.12 | 5.44E-01 | -0.05 | 8.08E-01 |
| <b>RP11-429J17.2</b> | -0.07 | 7.10E-01 | 0.05  | 8.08E-01 |
| <b>RP11-431N15.2</b> | -0.25 | 1.93E-01 | -0.05 | 8.08E-01 |
| <b>RP11-45M22.3</b>  | 0.03  | 8.99E-01 | -0.05 | 8.08E-01 |
| <b>RP11-83B20.6</b>  | 0.02  | 9.23E-01 | -0.05 | 8.08E-01 |
| <b>RYR1</b>          | 0.21  | 2.75E-01 | -0.05 | 8.08E-01 |
| <b>SRP72P2</b>       | -0.13 | 5.07E-01 | -0.05 | 8.08E-01 |
| <b>TNKS</b>          | -0.09 | 6.37E-01 | -0.05 | 8.08E-01 |
| <b>WNT2</b>          | -0.24 | 2.19E-01 | 0.05  | 8.08E-01 |
| <b>XRCC5</b>         | 0.12  | 5.37E-01 | -0.05 | 8.08E-01 |
| <b>ZEB2</b>          | -0.45 | 1.60E-02 | -0.05 | 8.08E-01 |
| <b>ZNF594</b>        | 0.15  | 4.54E-01 | -0.05 | 8.08E-01 |
| <b>ZNF605</b>        | 0.08  | 6.72E-01 | -0.05 | 8.08E-01 |
| <b>ADGRG2</b>        | -0.23 | 2.36E-01 | -0.05 | 8.09E-01 |
| <b>AL450226.2</b>    | 0.18  | 3.71E-01 | -0.05 | 8.09E-01 |
| <b>CTC-450M9.1</b>   | -0.37 | 5.23E-02 | -0.05 | 8.09E-01 |
| <b>CTC-490G23.6</b>  | 0.43  | 2.09E-02 | -0.05 | 8.09E-01 |

|                      |       |          |       |          |
|----------------------|-------|----------|-------|----------|
| <b>CTD-2270P14.2</b> | 0.06  | 7.52E-01 | -0.05 | 8.09E-01 |
| <b>FAM106DP</b>      | 0.09  | 6.59E-01 | -0.05 | 8.09E-01 |
| <b>KRTAP4-11</b>     | 0.06  | 7.61E-01 | -0.05 | 8.09E-01 |
| <b>NRP1</b>          | 0.28  | 1.45E-01 | -0.05 | 8.09E-01 |
| <b>OACYLP</b>        | -0.16 | 4.12E-01 | -0.05 | 8.09E-01 |
| <b>RBM33</b>         | -0.12 | 5.52E-01 | -0.05 | 8.09E-01 |
| <b>RNU7-49P</b>      | 0.07  | 7.27E-01 | -0.05 | 8.09E-01 |
| <b>RP11-640B6.1</b>  | 0.17  | 3.95E-01 | -0.05 | 8.09E-01 |
| <b>RP11-989F5.1</b>  | 0.04  | 8.42E-01 | -0.05 | 8.09E-01 |
| <b>RPS15AP6</b>      | -0.23 | 2.48E-01 | -0.05 | 8.09E-01 |
| <b>UHRF2</b>         | -0.33 | 8.37E-02 | -0.05 | 8.09E-01 |
| <b>XLOC_012332</b>   | -0.16 | 4.13E-01 | -0.05 | 8.09E-01 |
| <b>AC008982.2</b>    | 0.02  | 9.33E-01 | 0.05  | 8.09E-01 |
| <b>AC069257.8</b>    | -0.17 | 4.00E-01 | 0.05  | 8.09E-01 |
| <b>ACAD10</b>        | -0.02 | 9.28E-01 | 0.05  | 8.09E-01 |
| <b>ADARB2</b>        | 0.12  | 5.52E-01 | 0.05  | 8.09E-01 |
| <b>AL355531.2</b>    | -0.05 | 7.83E-01 | 0.05  | 8.09E-01 |
| <b>CENPT</b>         | 0.03  | 8.92E-01 | 0.05  | 8.09E-01 |
| <b>HEY2</b>          | -0.05 | 7.94E-01 | 0.05  | 8.09E-01 |
| <b>HNRNPA1P49</b>    | 0.17  | 3.98E-01 | 0.05  | 8.09E-01 |
| <b>HOOK2</b>         | -0.05 | 7.87E-01 | 0.05  | 8.09E-01 |
| <b>LINC01073</b>     | -0.06 | 7.60E-01 | 0.05  | 8.09E-01 |
| <b>MRPL30</b>        | 0.22  | 2.50E-01 | 0.05  | 8.09E-01 |
| <b>QKI</b>           | -0.05 | 7.98E-01 | 0.05  | 8.09E-01 |
| <b>RP11-367J11.3</b> | -0.13 | 4.93E-01 | 0.05  | 8.09E-01 |
| <b>RP11-380M21.3</b> | -0.09 | 6.49E-01 | 0.05  | 8.09E-01 |
| <b>SHANK3</b>        | -0.13 | 5.03E-01 | 0.05  | 8.09E-01 |
| <b>SNORA43</b>       | 0.20  | 3.03E-01 | 0.05  | 8.09E-01 |
| <b>AC016722.4</b>    | -0.10 | 6.15E-01 | 0.05  | 8.10E-01 |
| <b>ACA64</b>         | -0.09 | 6.48E-01 | -0.05 | 8.10E-01 |
| <b>AP000704.5</b>    | -0.16 | 4.16E-01 | -0.05 | 8.10E-01 |
| <b>BACH1-IT2</b>     | -0.04 | 8.55E-01 | -0.05 | 8.10E-01 |
| <b>BLOC1S4</b>       | 0.05  | 8.10E-01 | -0.05 | 8.10E-01 |
| <b>CD96</b>          | 0.32  | 9.68E-02 | 0.05  | 8.10E-01 |
| <b>CEP57</b>         | 0.17  | 3.89E-01 | 0.05  | 8.10E-01 |
| <b>CTC-344H19.6</b>  | -0.18 | 3.63E-01 | -0.05 | 8.10E-01 |
| <b>DPF1</b>          | -0.09 | 6.52E-01 | -0.05 | 8.10E-01 |
| <b>DPYD-AS1</b>      | -0.22 | 2.66E-01 | -0.05 | 8.10E-01 |
| <b>DYNLT3</b>        | 0.04  | 8.39E-01 | 0.05  | 8.10E-01 |
| <b>EMP3</b>          | -0.08 | 6.91E-01 | 0.05  | 8.10E-01 |
| <b>G3524</b>         | -0.11 | 5.62E-01 | 0.05  | 8.10E-01 |
| <b>G8972</b>         | 0.02  | 9.22E-01 | -0.05 | 8.10E-01 |
| <b>HCST</b>          | 0.08  | 6.86E-01 | 0.05  | 8.10E-01 |
| <b>KANTR</b>         | 0.06  | 7.49E-01 | 0.05  | 8.10E-01 |
| <b>MON1A</b>         | 0.22  | 2.56E-01 | 0.05  | 8.10E-01 |
| <b>NCAPH</b>         | 0.11  | 5.71E-01 | 0.05  | 8.10E-01 |
| <b>ONECUT2</b>       | 0.10  | 6.29E-01 | 0.05  | 8.10E-01 |

|               |       |          |       |          |
|---------------|-------|----------|-------|----------|
| POT1          | 0.05  | 7.87E-01 | -0.05 | 8.10E-01 |
| RAP1GDS1      | 0.08  | 6.97E-01 | -0.05 | 8.10E-01 |
| RP11-205A8.3  | -0.12 | 5.42E-01 | -0.05 | 8.10E-01 |
| RP11-218D6.4  | 0.02  | 9.25E-01 | -0.05 | 8.10E-01 |
| RP11-27M5.1   | 0.07  | 7.17E-01 | 0.05  | 8.10E-01 |
| RP11-498E2.9  | -0.17 | 3.92E-01 | 0.05  | 8.10E-01 |
| RP11-498P14.3 | -0.15 | 4.39E-01 | 0.05  | 8.10E-01 |
| RP11-659E9.4  | 0.10  | 6.24E-01 | 0.05  | 8.10E-01 |
| RP11-77M5.1   | 0.05  | 7.84E-01 | 0.05  | 8.10E-01 |
| RP11-793H13.3 | 0.01  | 9.49E-01 | 0.05  | 8.10E-01 |
| SHROOM4       | -0.14 | 4.65E-01 | -0.05 | 8.10E-01 |
| SKIV2L        | 0.21  | 2.85E-01 | -0.05 | 8.10E-01 |
| SLC2A4RG      | 0.03  | 8.73E-01 | 0.05  | 8.10E-01 |
| TMEM65        | 0.29  | 1.34E-01 | 0.05  | 8.10E-01 |
| XLOC_007628   | -0.01 | 9.69E-01 | 0.05  | 8.10E-01 |
| XLOC_008109   | 0.12  | 5.38E-01 | -0.05 | 8.10E-01 |
| ZNF676        | 0.09  | 6.50E-01 | -0.05 | 8.10E-01 |
| AC009501.4    | 0.18  | 3.70E-01 | 0.05  | 8.11E-01 |
| AC009505.2    | 0.31  | 1.04E-01 | -0.05 | 8.11E-01 |
| AF127936.9    | 0.02  | 9.39E-01 | -0.05 | 8.11E-01 |
| BLVRB         | 0.05  | 8.09E-01 | 0.05  | 8.11E-01 |
| BMS1P15       | -0.17 | 3.78E-01 | -0.05 | 8.11E-01 |
| CAND1         | 0.22  | 2.59E-01 | 0.05  | 8.11E-01 |
| CCDC40        | -0.25 | 2.00E-01 | -0.05 | 8.11E-01 |
| CNOT8         | 0.01  | 9.61E-01 | -0.05 | 8.11E-01 |
| CRKL          | -0.06 | 7.67E-01 | 0.05  | 8.11E-01 |
| DECR2         | 0.17  | 3.90E-01 | -0.05 | 8.11E-01 |
| G231          | 0.03  | 8.63E-01 | 0.05  | 8.11E-01 |
| HOXA10-AS     | 0.00  | 9.86E-01 | 0.05  | 8.11E-01 |
| KRTAP4-8      | -0.09 | 6.40E-01 | 0.05  | 8.11E-01 |
| LINC00854     | -0.24 | 2.27E-01 | 0.05  | 8.11E-01 |
| LRP3          | -0.07 | 7.35E-01 | 0.05  | 8.11E-01 |
| MED10         | 0.04  | 8.54E-01 | 0.05  | 8.11E-01 |
| RP1-257A7.4   | 0.09  | 6.63E-01 | -0.05 | 8.11E-01 |
| RP11-255A11.4 | 0.16  | 4.16E-01 | 0.05  | 8.11E-01 |
| RP11-428G5.7  | 0.13  | 4.97E-01 | 0.05  | 8.11E-01 |
| RP13-20L14.6  | 0.05  | 7.86E-01 | 0.05  | 8.11E-01 |
| RP4-631H13.6  | -0.29 | 1.40E-01 | -0.05 | 8.11E-01 |
| RPL39P6       | 0.00  | 9.87E-01 | 0.05  | 8.11E-01 |
| RPL7AP3       | 0.05  | 7.96E-01 | 0.05  | 8.11E-01 |
| RPS27AP3      | -0.06 | 7.72E-01 | -0.05 | 8.11E-01 |
| SEC23B        | 0.17  | 3.86E-01 | -0.05 | 8.11E-01 |
| SERPINB11     | 0.14  | 4.79E-01 | -0.05 | 8.11E-01 |
| TOPORS-AS1    | -0.07 | 7.25E-01 | 0.05  | 8.11E-01 |
| WRAP53        | -0.03 | 8.85E-01 | -0.05 | 8.11E-01 |
| XDH           | 0.29  | 1.34E-01 | -0.05 | 8.11E-01 |
| XLOC_001025   | 0.23  | 2.45E-01 | -0.05 | 8.11E-01 |

|                       |       |          |       |          |
|-----------------------|-------|----------|-------|----------|
| <b>XLOC_006637</b>    | -0.02 | 9.15E-01 | -0.05 | 8.11E-01 |
| <b>AARSD1</b>         | -0.19 | 3.26E-01 | -0.05 | 8.12E-01 |
| <b>AC011742.3</b>     | -0.09 | 6.38E-01 | 0.05  | 8.12E-01 |
| <b>ARID4B</b>         | -0.12 | 5.36E-01 | -0.05 | 8.12E-01 |
| <b>BLMH</b>           | -0.24 | 2.13E-01 | -0.05 | 8.12E-01 |
| <b>CELF2-AS1</b>      | -0.02 | 9.10E-01 | -0.05 | 8.12E-01 |
| <b>CTC-453G23.8</b>   | 0.23  | 2.48E-01 | -0.05 | 8.12E-01 |
| <b>CTD-2319I12.2</b>  | 0.26  | 1.86E-01 | 0.05  | 8.12E-01 |
| <b>CWC27</b>          | -0.19 | 3.22E-01 | -0.05 | 8.12E-01 |
| <b>EIF5B</b>          | 0.00  | 9.99E-01 | -0.05 | 8.12E-01 |
| <b>FAM136A</b>        | 0.19  | 3.39E-01 | -0.05 | 8.12E-01 |
| <b>FBXW10</b>         | 0.01  | 9.57E-01 | -0.05 | 8.12E-01 |
| <b>G24559</b>         | -0.39 | 4.21E-02 | -0.05 | 8.12E-01 |
| <b>LINC00431</b>      | -0.12 | 5.49E-01 | -0.05 | 8.12E-01 |
| <b>MACROD1</b>        | -0.08 | 6.93E-01 | -0.05 | 8.12E-01 |
| <b>MT1M</b>           | -0.08 | 6.91E-01 | -0.05 | 8.12E-01 |
| <b>MTND5P12</b>       | -0.38 | 4.66E-02 | 0.05  | 8.12E-01 |
| <b>NXF3</b>           | -0.27 | 1.63E-01 | -0.05 | 8.12E-01 |
| <b>OXER1</b>          | -0.07 | 7.36E-01 | 0.05  | 8.12E-01 |
| <b>PKD2L2</b>         | 0.01  | 9.77E-01 | -0.05 | 8.12E-01 |
| <b>PRR7-AS1</b>       | -0.08 | 7.00E-01 | -0.05 | 8.12E-01 |
| <b>RBM43P1</b>        | -0.05 | 8.03E-01 | -0.05 | 8.12E-01 |
| <b>RBMX2</b>          | -0.16 | 4.17E-01 | -0.05 | 8.12E-01 |
| <b>RBP5</b>           | -0.24 | 2.11E-01 | 0.05  | 8.12E-01 |
| <b>ROBO2</b>          | -0.19 | 3.39E-01 | 0.05  | 8.12E-01 |
| <b>RP11-307C12.11</b> | -0.14 | 4.92E-01 | 0.05  | 8.12E-01 |
| <b>RP5-965G21.3</b>   | -0.12 | 5.40E-01 | 0.05  | 8.12E-01 |
| <b>SLC7A5</b>         | 0.20  | 3.03E-01 | -0.05 | 8.12E-01 |
| <b>SLC9A7P1</b>       | 0.01  | 9.66E-01 | -0.05 | 8.12E-01 |
| <b>SSR1</b>           | 0.10  | 6.04E-01 | 0.05  | 8.12E-01 |
| <b>STRADA</b>         | -0.25 | 1.91E-01 | -0.05 | 8.12E-01 |
| <b>SUMO2P15</b>       | 0.12  | 5.36E-01 | 0.05  | 8.12E-01 |
| <b>TPT1P4</b>         | 0.08  | 7.03E-01 | -0.05 | 8.12E-01 |
| <b>UBR5</b>           | 0.06  | 7.46E-01 | -0.05 | 8.12E-01 |
| <b>UTP14A</b>         | 0.16  | 4.24E-01 | -0.05 | 8.12E-01 |
| <b>XLOC_001223</b>    | -0.05 | 8.09E-01 | 0.05  | 8.12E-01 |
| <b>ZCCHC8</b>         | 0.13  | 4.98E-01 | 0.05  | 8.12E-01 |
| <b>ZDHC3</b>          | 0.01  | 9.59E-01 | 0.05  | 8.12E-01 |
| <b>ZNF345</b>         | -0.11 | 5.77E-01 | 0.05  | 8.12E-01 |
| <b>ZNF621</b>         | 0.15  | 4.50E-01 | 0.05  | 8.12E-01 |
| <b>AP1S1</b>          | -0.31 | 1.05E-01 | -0.05 | 8.13E-01 |
| <b>ASB14</b>          | -0.19 | 3.45E-01 | 0.05  | 8.13E-01 |
| <b>C9orf78</b>        | 0.14  | 4.77E-01 | -0.05 | 8.13E-01 |
| <b>COPS4</b>          | 0.18  | 3.63E-01 | 0.05  | 8.13E-01 |
| <b>CTD-2114J12.1</b>  | -0.08 | 7.04E-01 | -0.05 | 8.13E-01 |
| <b>DEPDC4</b>         | 0.25  | 1.94E-01 | -0.05 | 8.13E-01 |
| <b>G30964</b>         | 0.17  | 3.93E-01 | 0.05  | 8.13E-01 |



|               |       |          |       |          |
|---------------|-------|----------|-------|----------|
| GOSR1         | 0.16  | 4.03E-01 | -0.05 | 8.13E-01 |
| HTR3A         | -0.09 | 6.52E-01 | -0.05 | 8.13E-01 |
| KIAA0895L     | 0.09  | 6.56E-01 | -0.05 | 8.13E-01 |
| KIAA1456      | -0.37 | 5.37E-02 | -0.05 | 8.13E-01 |
| LARP4P        | -0.29 | 1.41E-01 | 0.05  | 8.13E-01 |
| LTF           | 0.50  | 6.82E-03 | 0.05  | 8.13E-01 |
| MAP2K4        | 0.17  | 3.90E-01 | -0.05 | 8.13E-01 |
| MAP7          | 0.07  | 7.27E-01 | 0.05  | 8.13E-01 |
| MIR548O       | 0.27  | 1.67E-01 | 0.05  | 8.13E-01 |
| RN7SL179P     | 0.07  | 7.26E-01 | 0.05  | 8.13E-01 |
| RP1-102G20.2  | 0.06  | 7.52E-01 | -0.05 | 8.13E-01 |
| RP11-108K3.4  | 0.43  | 2.20E-02 | 0.05  | 8.13E-01 |
| RP11-34P13.9  | -0.05 | 7.95E-01 | -0.05 | 8.13E-01 |
| RP11-44D5.1   | -0.54 | 3.08E-03 | 0.05  | 8.13E-01 |
| RP11-539L10.3 | 0.04  | 8.36E-01 | 0.05  | 8.13E-01 |
| RP11-592N21.2 | -0.16 | 4.15E-01 | 0.05  | 8.13E-01 |
| RP11-64K12.8  | 0.23  | 2.37E-01 | -0.05 | 8.13E-01 |
| STAP2         | -0.03 | 8.99E-01 | 0.05  | 8.13E-01 |
| STK40         | 0.10  | 6.14E-01 | -0.05 | 8.13E-01 |
| TBCEL         | 0.01  | 9.78E-01 | 0.05  | 8.13E-01 |
| THAP7         | 0.10  | 6.23E-01 | -0.05 | 8.13E-01 |
| TLX2          | -0.02 | 9.15E-01 | -0.05 | 8.13E-01 |
| WDR3          | 0.33  | 8.73E-02 | 0.05  | 8.13E-01 |
| ZNF197        | 0.23  | 2.31E-01 | -0.05 | 8.13E-01 |
| ASB6          | 0.15  | 4.36E-01 | -0.05 | 8.15E-01 |
| ATP6V1B2      | 0.19  | 3.29E-01 | 0.05  | 8.15E-01 |
| BCL7B         | 0.13  | 5.00E-01 | 0.05  | 8.15E-01 |
| CDK5RAP1      | 0.03  | 8.95E-01 | -0.05 | 8.15E-01 |
| CGA           | -0.30 | 1.24E-01 | -0.05 | 8.15E-01 |
| CTD-2366F13.1 | -0.05 | 8.13E-01 | -0.05 | 8.15E-01 |
| CTR9          | 0.16  | 4.07E-01 | 0.05  | 8.15E-01 |
| CWC22         | 0.12  | 5.59E-01 | -0.05 | 8.15E-01 |
| DENND6A       | 0.12  | 5.49E-01 | 0.05  | 8.15E-01 |
| DLEC1         | -0.03 | 8.69E-01 | 0.05  | 8.15E-01 |
| G12464        | -0.12 | 5.28E-01 | 0.05  | 8.15E-01 |
| HMGA1P2       | -0.10 | 6.15E-01 | -0.05 | 8.15E-01 |
| HSPA12B       | -0.24 | 2.19E-01 | 0.05  | 8.15E-01 |
| KMT2D         | -0.11 | 5.87E-01 | 0.05  | 8.15E-01 |
| LINC00710     | 0.30  | 1.27E-01 | -0.05 | 8.15E-01 |
| LINC00884     | -0.19 | 3.41E-01 | 0.05  | 8.15E-01 |
| MICB          | -0.05 | 8.01E-01 | 0.05  | 8.15E-01 |
| MIR4449       | 0.22  | 2.56E-01 | 0.05  | 8.15E-01 |
| NOLC1         | 0.15  | 4.39E-01 | -0.05 | 8.15E-01 |
| NOTUM         | -0.08 | 6.96E-01 | 0.05  | 8.15E-01 |
| OR7E89P       | -0.05 | 8.01E-01 | -0.05 | 8.15E-01 |
| PHC2          | 0.36  | 6.24E-02 | 0.05  | 8.15E-01 |
| PKMYT1        | 0.03  | 8.93E-01 | 0.05  | 8.15E-01 |

|                      |       |          |       |          |
|----------------------|-------|----------|-------|----------|
| <b>PLEKHM3</b>       | -0.09 | 6.64E-01 | 0.05  | 8.15E-01 |
| <b>POLR2J3</b>       | -0.12 | 5.43E-01 | -0.05 | 8.15E-01 |
| <b>RNU6-1165P</b>    | -0.06 | 7.79E-01 | -0.05 | 8.15E-01 |
| <b>RNU6-866P</b>     | -0.17 | 3.96E-01 | -0.05 | 8.15E-01 |
| <b>RNU6ATAC12P</b>   | -0.13 | 5.15E-01 | -0.05 | 8.15E-01 |
| <b>RP11-177F15.1</b> | 0.15  | 4.45E-01 | 0.05  | 8.15E-01 |
| <b>RP11-241J12.1</b> | -0.38 | 4.83E-02 | 0.05  | 8.15E-01 |
| <b>RP11-411K7.1</b>  | 0.21  | 2.93E-01 | -0.05 | 8.15E-01 |
| <b>RP11-421L21.3</b> | -0.08 | 6.97E-01 | -0.05 | 8.15E-01 |
| <b>RP11-426D19.1</b> | -0.10 | 6.09E-01 | 0.05  | 8.15E-01 |
| <b>RP11-495P10.3</b> | 0.06  | 7.72E-01 | -0.05 | 8.15E-01 |
| <b>RP11-500C11.3</b> | 0.13  | 5.05E-01 | 0.05  | 8.15E-01 |
| <b>RP11-536C12.1</b> | -0.30 | 1.21E-01 | -0.05 | 8.15E-01 |
| <b>RP11-585F1.6</b>  | 0.20  | 3.02E-01 | -0.05 | 8.15E-01 |
| <b>RP4-705D16.3</b>  | -0.29 | 1.35E-01 | -0.05 | 8.15E-01 |
| <b>S100PBP</b>       | 0.08  | 6.82E-01 | 0.05  | 8.15E-01 |
| <b>SEC63</b>         | -0.11 | 5.83E-01 | 0.05  | 8.15E-01 |
| <b>SLC3A2</b>        | 0.14  | 4.89E-01 | 0.05  | 8.15E-01 |
| <b>SLCO4A1</b>       | 0.04  | 8.45E-01 | 0.05  | 8.15E-01 |
| <b>SNHG11</b>        | -0.28 | 1.44E-01 | -0.05 | 8.15E-01 |
| <b>TMC3-AS1</b>      | 0.02  | 9.31E-01 | 0.05  | 8.15E-01 |
| <b>TSPYL1</b>        | 0.29  | 1.38E-01 | -0.05 | 8.15E-01 |
| <b>TUBB6</b>         | 0.27  | 1.63E-01 | 0.05  | 8.15E-01 |
| <b>WDR62</b>         | 0.15  | 4.51E-01 | -0.05 | 8.15E-01 |
| <b>ZNF468</b>        | 0.01  | 9.74E-01 | -0.05 | 8.15E-01 |
| <b>ANXA8L2</b>       | 0.13  | 5.07E-01 | 0.05  | 8.16E-01 |
| <b>MFSD1P1</b>       | -0.26 | 1.76E-01 | 0.05  | 8.16E-01 |
| <b>NAT9</b>          | 0.32  | 9.78E-02 | 0.05  | 8.16E-01 |
| <b>RFXAP</b>         | -0.10 | 6.24E-01 | 0.05  | 8.16E-01 |
| <b>RNFT1</b>         | -0.17 | 3.93E-01 | 0.05  | 8.16E-01 |
| <b>RP11-365O16.1</b> | 0.13  | 5.19E-01 | 0.05  | 8.16E-01 |
| <b>RPL34P21</b>      | 0.17  | 3.85E-01 | 0.05  | 8.16E-01 |
| <b>RPL7P21</b>       | 0.03  | 8.62E-01 | 0.05  | 8.16E-01 |
| <b>SLC44A5</b>       | 0.14  | 4.67E-01 | 0.05  | 8.16E-01 |
| <b>TRUB2</b>         | 0.21  | 2.75E-01 | 0.05  | 8.16E-01 |
| <b>AC099684.1</b>    | -0.34 | 7.97E-02 | -0.05 | 8.16E-01 |
| <b>ANKRD27</b>       | -0.09 | 6.66E-01 | -0.05 | 8.16E-01 |
| <b>BSDC1</b>         | -0.07 | 7.26E-01 | -0.05 | 8.16E-01 |
| <b>C3orf14</b>       | -0.08 | 6.71E-01 | -0.05 | 8.16E-01 |
| <b>DDHD2</b>         | 0.01  | 9.65E-01 | -0.05 | 8.16E-01 |
| <b>ISLR2</b>         | -0.12 | 5.58E-01 | -0.05 | 8.16E-01 |
| <b>LRR59</b>         | 0.17  | 3.93E-01 | -0.05 | 8.16E-01 |
| <b>RP11-165F24.3</b> | -0.25 | 1.93E-01 | -0.05 | 8.16E-01 |
| <b>RP11-230F18.5</b> | -0.03 | 8.80E-01 | -0.05 | 8.16E-01 |
| <b>RP11-513D5.2</b>  | 0.04  | 8.54E-01 | -0.05 | 8.16E-01 |
| <b>RP11-531A24.5</b> | -0.04 | 8.45E-01 | -0.05 | 8.16E-01 |
| <b>RP11-61L19.1</b>  | -0.04 | 8.38E-01 | -0.05 | 8.16E-01 |

|               |       |          |       |          |
|---------------|-------|----------|-------|----------|
| RP4-803A2.2   | -0.11 | 5.83E-01 | -0.05 | 8.16E-01 |
| RP5-1153D9.5  | -0.27 | 1.67E-01 | -0.05 | 8.16E-01 |
| RTN2          | -0.19 | 3.28E-01 | -0.05 | 8.16E-01 |
| SNORA72       | -0.02 | 9.39E-01 | -0.05 | 8.16E-01 |
| SOX8          | -0.12 | 5.29E-01 | -0.05 | 8.16E-01 |
| TCF4-AS2      | -0.32 | 9.45E-02 | -0.05 | 8.16E-01 |
| AC090804.1    | -0.27 | 1.64E-01 | 0.05  | 8.17E-01 |
| AC105760.2    | -0.12 | 5.41E-01 | -0.05 | 8.17E-01 |
| AP004290.1    | -0.05 | 8.08E-01 | -0.05 | 8.17E-01 |
| ARL13A        | -0.09 | 6.60E-01 | 0.05  | 8.17E-01 |
| CCDC65        | -0.04 | 8.50E-01 | -0.05 | 8.17E-01 |
| DDX50P2       | -0.23 | 2.33E-01 | 0.05  | 8.17E-01 |
| DGKQ          | -0.14 | 4.75E-01 | -0.05 | 8.17E-01 |
| F2RL1         | 0.04  | 8.25E-01 | 0.05  | 8.17E-01 |
| LINC00668     | 0.05  | 7.87E-01 | -0.05 | 8.17E-01 |
| LINC01347     | 0.05  | 8.12E-01 | -0.05 | 8.17E-01 |
| MAPT-IT1      | -0.12 | 5.29E-01 | -0.05 | 8.17E-01 |
| MDH1B         | 0.04  | 8.49E-01 | -0.05 | 8.17E-01 |
| PDZRN4        | -0.21 | 2.94E-01 | -0.05 | 8.17E-01 |
| PTTG1         | 0.27  | 1.67E-01 | 0.05  | 8.17E-01 |
| RP1-29C18.9   | 0.02  | 9.34E-01 | -0.05 | 8.17E-01 |
| RP11-1191J2.4 | -0.09 | 6.52E-01 | -0.05 | 8.17E-01 |
| RP11-214O14.1 | -0.04 | 8.21E-01 | 0.05  | 8.17E-01 |
| RP11-253M7.1  | 0.24  | 2.17E-01 | -0.05 | 8.17E-01 |
| RP11-3K24.2   | 0.08  | 6.92E-01 | -0.05 | 8.17E-01 |
| RP11-449L13.2 | -0.14 | 4.90E-01 | -0.05 | 8.17E-01 |
| RP11-99A14.1  | 0.16  | 4.08E-01 | -0.05 | 8.17E-01 |
| RPP40         | 0.09  | 6.39E-01 | -0.05 | 8.17E-01 |
| STK4          | -0.01 | 9.57E-01 | 0.05  | 8.17E-01 |
| TNPO1         | 0.08  | 6.79E-01 | -0.05 | 8.17E-01 |
| TPRN          | 0.05  | 8.08E-01 | -0.05 | 8.17E-01 |
| TRAJ3         | -0.08 | 6.83E-01 | -0.05 | 8.17E-01 |
| XLOC_006901   | -0.04 | 8.25E-01 | 0.05  | 8.17E-01 |
| YWHAQP5       | -0.18 | 3.66E-01 | 0.05  | 8.17E-01 |
| AC002472.1    | 0.14  | 4.80E-01 | -0.05 | 8.18E-01 |
| AC005336.4    | 0.01  | 9.76E-01 | 0.05  | 8.18E-01 |
| AC009831.1    | 0.06  | 7.80E-01 | -0.05 | 8.18E-01 |
| AC012442.6    | -0.05 | 8.08E-01 | -0.05 | 8.18E-01 |
| AC139100.4    | -0.02 | 9.14E-01 | -0.05 | 8.18E-01 |
| ADH1C         | -0.14 | 4.88E-01 | -0.05 | 8.18E-01 |
| AREGB         | -0.07 | 7.29E-01 | -0.05 | 8.18E-01 |
| COX8A         | 0.06  | 7.62E-01 | 0.05  | 8.18E-01 |
| DHX16         | 0.07  | 7.23E-01 | 0.05  | 8.18E-01 |
| EIF4G1        | 0.00  | 9.91E-01 | -0.05 | 8.18E-01 |
| FAM86GP       | -0.22 | 2.62E-01 | -0.05 | 8.18E-01 |
| FLJ43879      | 0.30  | 1.26E-01 | 0.05  | 8.18E-01 |
| FPR2          | 0.15  | 4.55E-01 | 0.05  | 8.18E-01 |

|                      |       |          |       |          |
|----------------------|-------|----------|-------|----------|
| <b>G27953</b>        | 0.22  | 2.59E-01 | -0.05 | 8.18E-01 |
| <b>HNRNPA1P62</b>    | -0.36 | 6.18E-02 | -0.05 | 8.18E-01 |
| <b>IQSEC1</b>        | 0.23  | 2.32E-01 | 0.05  | 8.18E-01 |
| <b>KLF3P1</b>        | 0.11  | 5.74E-01 | -0.05 | 8.18E-01 |
| <b>KLHDC2</b>        | -0.16 | 4.19E-01 | -0.05 | 8.18E-01 |
| <b>KRT74</b>         | 0.00  | 9.92E-01 | 0.05  | 8.18E-01 |
| <b>LANCL1</b>        | -0.06 | 7.80E-01 | -0.05 | 8.18E-01 |
| <b>MRPS31</b>        | 0.24  | 2.15E-01 | -0.05 | 8.18E-01 |
| <b>NAPSB</b>         | 0.10  | 6.20E-01 | 0.05  | 8.18E-01 |
| <b>NPIPP1</b>        | -0.29 | 1.39E-01 | -0.05 | 8.18E-01 |
| <b>RHOD</b>          | -0.09 | 6.60E-01 | -0.05 | 8.18E-01 |
| <b>RNF8</b>          | 0.16  | 4.20E-01 | -0.05 | 8.18E-01 |
| <b>RNU6-212P</b>     | -0.09 | 6.51E-01 | 0.05  | 8.18E-01 |
| <b>RP1-286D6.5</b>   | -0.18 | 3.49E-01 | -0.05 | 8.18E-01 |
| <b>RP11-247A12.2</b> | 0.10  | 6.16E-01 | 0.05  | 8.18E-01 |
| <b>RP11-384A12.1</b> | -0.11 | 5.81E-01 | 0.05  | 8.18E-01 |
| <b>RP11-43N16.4</b>  | -0.10 | 6.01E-01 | -0.05 | 8.18E-01 |
| <b>RP11-732A21.2</b> | -0.16 | 4.18E-01 | -0.05 | 8.18E-01 |
| <b>RP11-932O9.8</b>  | -0.09 | 6.61E-01 | -0.05 | 8.18E-01 |
| <b>SLC25A18</b>      | 0.10  | 6.18E-01 | -0.05 | 8.18E-01 |
| <b>SNRNP25</b>       | 0.01  | 9.40E-01 | 0.05  | 8.18E-01 |
| <b>TBC1D32</b>       | -0.09 | 6.67E-01 | -0.05 | 8.18E-01 |
| <b>TCTN2</b>         | -0.05 | 8.08E-01 | -0.05 | 8.18E-01 |
| <b>TM9SF3</b>        | 0.27  | 1.70E-01 | -0.05 | 8.18E-01 |
| <b>XAB2</b>          | -0.40 | 3.55E-02 | 0.05  | 8.18E-01 |
| <b>ZBTB7B</b>        | -0.04 | 8.48E-01 | -0.05 | 8.18E-01 |
| <b>AC091729.7</b>    | -0.19 | 3.40E-01 | 0.05  | 8.19E-01 |
| <b>ANTXRLP1</b>      | -0.28 | 1.53E-01 | 0.05  | 8.19E-01 |
| <b>BNIP3P27</b>      | 0.37  | 5.40E-02 | 0.05  | 8.19E-01 |
| <b>IRX3</b>          | 0.27  | 1.71E-01 | 0.05  | 8.19E-01 |
| <b>JAM2</b>          | -0.34 | 7.77E-02 | 0.05  | 8.19E-01 |
| <b>LAPTM4A</b>       | 0.04  | 8.52E-01 | 0.05  | 8.19E-01 |
| <b>LINC01343</b>     | 0.19  | 3.41E-01 | 0.05  | 8.19E-01 |
| <b>MMP27</b>         | -0.23 | 2.44E-01 | 0.05  | 8.19E-01 |
| <b>NFATC4</b>        | -0.28 | 1.46E-01 | 0.05  | 8.19E-01 |
| <b>POPDC3</b>        | -0.30 | 1.19E-01 | 0.05  | 8.19E-01 |
| <b>PXYLP1</b>        | -0.04 | 8.22E-01 | 0.05  | 8.19E-01 |
| <b>RNU6-1285P</b>    | -0.02 | 9.05E-01 | 0.05  | 8.19E-01 |
| <b>SCML4</b>         | -0.26 | 1.78E-01 | 0.05  | 8.19E-01 |
| <b>SPPL3</b>         | 0.13  | 5.09E-01 | 0.05  | 8.19E-01 |
| <b>TRAK1</b>         | 0.44  | 2.01E-02 | 0.05  | 8.19E-01 |
| <b>TTLL7</b>         | 0.09  | 6.34E-01 | 0.05  | 8.19E-01 |
| <b>AL353671.1</b>    | -0.25 | 1.98E-01 | -0.05 | 8.19E-01 |
| <b>COPZ1</b>         | 0.10  | 6.29E-01 | -0.05 | 8.19E-01 |
| <b>DDX39A</b>        | 0.15  | 4.53E-01 | -0.05 | 8.19E-01 |
| <b>DDX55P1</b>       | 0.04  | 8.57E-01 | -0.05 | 8.19E-01 |
| <b>FTSJ2</b>         | 0.11  | 5.70E-01 | -0.05 | 8.19E-01 |

|                 |       |          |       |          |
|-----------------|-------|----------|-------|----------|
| LINC00562       | -0.34 | 7.64E-02 | -0.05 | 8.19E-01 |
| NDUFA4          | 0.15  | 4.53E-01 | -0.05 | 8.19E-01 |
| PTGES2-AS1      | -0.07 | 7.15E-01 | -0.05 | 8.19E-01 |
| RBBP7           | -0.14 | 4.78E-01 | -0.05 | 8.19E-01 |
| RCN3            | -0.24 | 2.26E-01 | -0.05 | 8.19E-01 |
| RN7SKP230       | 0.13  | 5.01E-01 | -0.05 | 8.19E-01 |
| RP11-175O19.4   | 0.20  | 2.98E-01 | -0.05 | 8.19E-01 |
| RP11-235E17.2   | 0.04  | 8.58E-01 | -0.05 | 8.19E-01 |
| RP11-320P11.1   | -0.07 | 7.20E-01 | -0.05 | 8.19E-01 |
| RP11-597M17.3   | 0.11  | 5.77E-01 | -0.05 | 8.19E-01 |
| RP11-775C24.3   | -0.03 | 8.88E-01 | -0.05 | 8.19E-01 |
| RPL7AP2         | -0.20 | 3.15E-01 | -0.05 | 8.19E-01 |
| SAPCD1          | -0.17 | 3.76E-01 | -0.05 | 8.19E-01 |
| SNORD116-2      | -0.01 | 9.70E-01 | -0.05 | 8.19E-01 |
| SPCS1           | 0.13  | 5.05E-01 | -0.05 | 8.19E-01 |
| THEMIS2         | 0.02  | 9.09E-01 | -0.05 | 8.19E-01 |
| XXbac-B476C20.9 | -0.25 | 2.05E-01 | -0.05 | 8.19E-01 |
| AC105053.3      | 0.20  | 3.18E-01 | -0.05 | 8.20E-01 |
| ALG5            | 0.07  | 7.07E-01 | -0.05 | 8.20E-01 |
| BRPF1           | -0.20 | 2.98E-01 | 0.05  | 8.20E-01 |
| CSRP2           | -0.04 | 8.59E-01 | 0.05  | 8.20E-01 |
| CTA-221G9.10    | -0.48 | 9.05E-03 | -0.05 | 8.20E-01 |
| FAM186A         | 0.06  | 7.44E-01 | -0.05 | 8.20E-01 |
| G40352          | -0.34 | 7.61E-02 | -0.05 | 8.20E-01 |
| LINC00839       | -0.47 | 1.14E-02 | 0.05  | 8.20E-01 |
| LRRC14          | -0.01 | 9.51E-01 | -0.05 | 8.20E-01 |
| MAFF            | 0.05  | 7.82E-01 | 0.05  | 8.20E-01 |
| MAP2K7          | 0.11  | 5.88E-01 | 0.05  | 8.20E-01 |
| MIR3140         | -0.20 | 3.11E-01 | -0.05 | 8.20E-01 |
| NEK10           | -0.11 | 5.80E-01 | -0.05 | 8.20E-01 |
| NRBF2P5         | 0.18  | 3.46E-01 | -0.05 | 8.20E-01 |
| PAK2            | 0.19  | 3.41E-01 | 0.05  | 8.20E-01 |
| PLEC            | -0.03 | 8.65E-01 | 0.05  | 8.20E-01 |
| RBM14           | -0.13 | 4.99E-01 | 0.05  | 8.20E-01 |
| RN7SL75P        | -0.01 | 9.42E-01 | -0.05 | 8.20E-01 |
| RNU6-42P        | 0.39  | 3.91E-02 | 0.05  | 8.20E-01 |
| RP11-152N13.16  | -0.02 | 9.16E-01 | 0.05  | 8.20E-01 |
| RP11-50I19.2    | -0.07 | 7.30E-01 | 0.05  | 8.20E-01 |
| RP11-98J23.2    | 0.00  | 9.89E-01 | -0.05 | 8.20E-01 |
| RP5-1132H15.1   | -0.28 | 1.56E-01 | -0.05 | 8.20E-01 |
| RPL13AP5        | 0.10  | 6.00E-01 | -0.05 | 8.20E-01 |
| RPL38           | 0.05  | 8.19E-01 | 0.05  | 8.20E-01 |
| RPL39L          | -0.05 | 8.08E-01 | -0.05 | 8.20E-01 |
| RPN2            | 0.08  | 6.68E-01 | -0.05 | 8.20E-01 |
| SAP30BP         | 0.06  | 7.54E-01 | 0.05  | 8.20E-01 |
| TET2            | -0.13 | 5.15E-01 | -0.05 | 8.20E-01 |
| TMED4           | 0.25  | 1.91E-01 | 0.05  | 8.20E-01 |

|                      |       |          |       |          |
|----------------------|-------|----------|-------|----------|
| <b>XLOC_012036</b>   | -0.06 | 7.57E-01 | 0.05  | 8.20E-01 |
| <b>AL627171.2</b>    | -0.15 | 4.44E-01 | -0.05 | 8.22E-01 |
| <b>ANKRD54</b>       | 0.19  | 3.32E-01 | 0.05  | 8.22E-01 |
| <b>CTD-3179P9.1</b>  | -0.05 | 7.87E-01 | -0.05 | 8.22E-01 |
| <b>DLL4</b>          | 0.12  | 5.46E-01 | 0.05  | 8.22E-01 |
| <b>FAM86C1</b>       | 0.10  | 6.18E-01 | 0.05  | 8.22E-01 |
| <b>FKBP9P1</b>       | 0.25  | 2.04E-01 | 0.05  | 8.22E-01 |
| <b>HNRNPA1P27</b>    | -0.05 | 8.02E-01 | 0.05  | 8.22E-01 |
| <b>LACTB</b>         | 0.27  | 1.69E-01 | 0.05  | 8.22E-01 |
| <b>MIR3609</b>       | -0.13 | 5.02E-01 | -0.05 | 8.22E-01 |
| <b>MXN1</b>          | -0.23 | 2.44E-01 | 0.05  | 8.22E-01 |
| <b>NDUFB4P2</b>      | -0.24 | 2.16E-01 | -0.05 | 8.22E-01 |
| <b>NDUFS6</b>        | 0.14  | 4.82E-01 | 0.05  | 8.22E-01 |
| <b>OCLN</b>          | 0.21  | 2.83E-01 | -0.05 | 8.22E-01 |
| <b>PIK3CD-AS2</b>    | -0.06 | 7.66E-01 | 0.05  | 8.22E-01 |
| <b>PRICKLE2-AS3</b>  | -0.15 | 4.42E-01 | 0.05  | 8.22E-01 |
| <b>RGN</b>           | -0.15 | 4.31E-01 | -0.05 | 8.22E-01 |
| <b>RNU6-123P</b>     | -0.21 | 2.92E-01 | -0.05 | 8.22E-01 |
| <b>RP11-136C24.2</b> | 0.26  | 1.82E-01 | -0.05 | 8.22E-01 |
| <b>RP11-376P6.3</b>  | -0.35 | 7.08E-02 | -0.05 | 8.22E-01 |
| <b>RP11-691F15.1</b> | -0.52 | 4.52E-03 | -0.05 | 8.22E-01 |
| <b>RP11-782C8.1</b>  | 0.00  | 9.82E-01 | 0.05  | 8.22E-01 |
| <b>RP11-83A24.1</b>  | -0.33 | 8.24E-02 | -0.05 | 8.22E-01 |
| <b>RP11-85B7.2</b>   | 0.01  | 9.70E-01 | 0.05  | 8.22E-01 |
| <b>RPL12P20</b>      | -0.10 | 6.06E-01 | -0.05 | 8.22E-01 |
| <b>SEPSECS-AS1</b>   | -0.01 | 9.45E-01 | 0.05  | 8.22E-01 |
| <b>TRDV1</b>         | 0.06  | 7.68E-01 | 0.05  | 8.22E-01 |
| <b>UBL5</b>          | 0.13  | 5.18E-01 | 0.05  | 8.22E-01 |
| <b>WRB</b>           | 0.05  | 7.88E-01 | -0.05 | 8.22E-01 |
| <b>XLOC_003411</b>   | -0.03 | 8.91E-01 | -0.05 | 8.22E-01 |
| <b>XLOC_013499</b>   | -0.28 | 1.56E-01 | -0.05 | 8.22E-01 |
| <b>ZNF358</b>        | 0.15  | 4.41E-01 | 0.05  | 8.22E-01 |
| <b>ZNF614</b>        | -0.06 | 7.65E-01 | 0.05  | 8.22E-01 |
| <b>AC004057.1</b>    | 0.14  | 4.66E-01 | -0.05 | 8.23E-01 |
| <b>AC012627.1</b>    | 0.39  | 3.91E-02 | -0.05 | 8.23E-01 |
| <b>AC073215.1</b>    | -0.11 | 5.69E-01 | 0.05  | 8.23E-01 |
| <b>AC110084.1</b>    | -0.21 | 2.78E-01 | -0.05 | 8.23E-01 |
| <b>C11orf30</b>      | -0.05 | 8.10E-01 | -0.05 | 8.23E-01 |
| <b>C5orf51</b>       | 0.17  | 3.86E-01 | -0.05 | 8.23E-01 |
| <b>CACNA1A</b>       | 0.04  | 8.37E-01 | -0.05 | 8.23E-01 |
| <b>CHST6</b>         | 0.00  | 9.83E-01 | -0.05 | 8.23E-01 |
| <b>CTC-497E21.3</b>  | 0.17  | 3.88E-01 | -0.05 | 8.23E-01 |
| <b>CYR61</b>         | -0.01 | 9.60E-01 | 0.05  | 8.23E-01 |
| <b>DONSON</b>        | -0.09 | 6.55E-01 | -0.05 | 8.23E-01 |
| <b>G18355</b>        | -0.13 | 4.94E-01 | -0.05 | 8.23E-01 |
| <b>G31717</b>        | -0.02 | 9.01E-01 | -0.05 | 8.23E-01 |
| <b>GRIK4</b>         | -0.16 | 4.12E-01 | -0.05 | 8.23E-01 |

|               |       |          |       |          |
|---------------|-------|----------|-------|----------|
| HEATR3        | 0.22  | 2.52E-01 | 0.05  | 8.23E-01 |
| HIST1H1A      | -0.23 | 2.47E-01 | -0.05 | 8.23E-01 |
| LGALS8-AS1    | 0.14  | 4.65E-01 | -0.05 | 8.23E-01 |
| LNX1          | 0.08  | 6.74E-01 | -0.05 | 8.23E-01 |
| MIR30C1       | 0.31  | 1.09E-01 | -0.05 | 8.23E-01 |
| MPP2          | -0.43 | 2.38E-02 | -0.05 | 8.23E-01 |
| MTFR2         | 0.12  | 5.43E-01 | 0.05  | 8.23E-01 |
| MTND2P5       | 0.08  | 6.94E-01 | -0.05 | 8.23E-01 |
| NBEA          | -0.22 | 2.54E-01 | -0.05 | 8.23E-01 |
| NLGN1-AS1     | -0.08 | 6.77E-01 | -0.05 | 8.23E-01 |
| NLRP2         | 0.07  | 7.14E-01 | 0.05  | 8.23E-01 |
| NPY6R         | -0.15 | 4.51E-01 | 0.05  | 8.23E-01 |
| PAPSS2        | 0.13  | 4.94E-01 | -0.05 | 8.23E-01 |
| PARD6A        | 0.33  | 8.40E-02 | -0.05 | 8.23E-01 |
| PDIA3P2       | -0.22 | 2.65E-01 | -0.05 | 8.23E-01 |
| PGAM5         | 0.08  | 6.68E-01 | 0.05  | 8.23E-01 |
| REC8          | 0.04  | 8.41E-01 | 0.05  | 8.23E-01 |
| RP11-217B1.2  | -0.13 | 5.05E-01 | -0.05 | 8.23E-01 |
| RP11-305E17.4 | -0.01 | 9.42E-01 | -0.05 | 8.23E-01 |
| RP11-325E5.1  | 0.18  | 3.63E-01 | -0.05 | 8.23E-01 |
| RP11-855A2.3  | -0.10 | 6.21E-01 | -0.05 | 8.23E-01 |
| RP5-1024N4.4  | -0.17 | 3.95E-01 | -0.05 | 8.23E-01 |
| SAXO2         | 0.19  | 3.36E-01 | -0.05 | 8.23E-01 |
| SETD9         | 0.37  | 5.52E-02 | 0.05  | 8.23E-01 |
| TMEM132D      | 0.30  | 1.24E-01 | 0.05  | 8.23E-01 |
| TSR1          | 0.27  | 1.67E-01 | -0.05 | 8.23E-01 |
| TUBB2A        | 0.06  | 7.79E-01 | 0.05  | 8.23E-01 |
| UBE2T         | 0.04  | 8.57E-01 | -0.05 | 8.23E-01 |
| XLOC_006699   | 0.41  | 3.12E-02 | 0.05  | 8.23E-01 |
| ZNF692        | 0.04  | 8.52E-01 | 0.05  | 8.23E-01 |
| AC012513.4    | -0.08 | 6.91E-01 | -0.04 | 8.24E-01 |
| AC073657.1    | 0.14  | 4.80E-01 | -0.04 | 8.24E-01 |
| BANF1P1       | -0.11 | 5.73E-01 | -0.04 | 8.24E-01 |
| DGKD          | -0.10 | 6.15E-01 | -0.04 | 8.24E-01 |
| DIRC3-AS1     | 0.14  | 4.86E-01 | -0.04 | 8.24E-01 |
| IRX1          | -0.23 | 2.47E-01 | -0.04 | 8.24E-01 |
| LARP4B        | 0.34  | 7.42E-02 | -0.04 | 8.24E-01 |
| MRPL39        | -0.02 | 9.34E-01 | -0.04 | 8.24E-01 |
| NUDCD1        | 0.09  | 6.38E-01 | -0.04 | 8.24E-01 |
| PDCD6IPP1     | -0.11 | 5.71E-01 | -0.04 | 8.24E-01 |
| RNU6-766P     | -0.09 | 6.34E-01 | -0.04 | 8.24E-01 |
| RP11-840I19.5 | -0.06 | 7.44E-01 | -0.04 | 8.24E-01 |
| RPL19         | 0.15  | 4.54E-01 | -0.04 | 8.24E-01 |
| UST-AS1       | 0.10  | 6.19E-01 | -0.04 | 8.24E-01 |
| ZMYM2         | 0.08  | 6.94E-01 | -0.04 | 8.24E-01 |
| ANXA4         | 0.04  | 8.51E-01 | 0.04  | 8.24E-01 |
| CTB-26E19.1   | -0.12 | 5.42E-01 | 0.04  | 8.24E-01 |

|               |       |          |       |          |
|---------------|-------|----------|-------|----------|
| HS6ST3        | 0.14  | 4.70E-01 | 0.04  | 8.24E-01 |
| ILF3-AS1      | -0.19 | 3.23E-01 | 0.04  | 8.24E-01 |
| KDM6B         | 0.13  | 5.11E-01 | 0.04  | 8.24E-01 |
| PLGRKT        | 0.52  | 5.02E-03 | 0.04  | 8.24E-01 |
| PROS2P        | -0.22 | 2.59E-01 | 0.04  | 8.24E-01 |
| RP11-379F4.6  | 0.12  | 5.51E-01 | 0.04  | 8.24E-01 |
| RP11-43A14.1  | -0.39 | 4.04E-02 | 0.04  | 8.24E-01 |
| RP11-552C15.1 | -0.01 | 9.54E-01 | 0.04  | 8.24E-01 |
| RSPO1         | -0.14 | 4.80E-01 | 0.04  | 8.24E-01 |
| SNORA2B       | -0.05 | 8.19E-01 | 0.04  | 8.24E-01 |
| SNX5          | 0.27  | 1.63E-01 | 0.04  | 8.24E-01 |
| TMEM180       | -0.14 | 4.81E-01 | 0.04  | 8.24E-01 |
| XLOC_005514   | -0.15 | 4.54E-01 | 0.04  | 8.24E-01 |
| ZNF148        | -0.02 | 9.36E-01 | 0.04  | 8.24E-01 |
| ZNF807        | 0.07  | 7.20E-01 | 0.04  | 8.24E-01 |
| AC093585.6    | 0.06  | 7.49E-01 | -0.04 | 8.25E-01 |
| AGBL1         | -0.31 | 1.06E-01 | 0.04  | 8.25E-01 |
| AL360176.1    | -0.04 | 8.59E-01 | -0.04 | 8.25E-01 |
| AP002954.3    | -0.17 | 3.86E-01 | -0.04 | 8.25E-01 |
| C6orf132      | 0.04  | 8.32E-01 | 0.04  | 8.25E-01 |
| CAMTA1        | -0.03 | 8.79E-01 | 0.04  | 8.25E-01 |
| CTA-243E7.4   | 0.18  | 3.50E-01 | -0.04 | 8.25E-01 |
| CTB-178M22.2  | -0.31 | 1.10E-01 | 0.04  | 8.25E-01 |
| FAM127C       | 0.24  | 2.11E-01 | 0.04  | 8.25E-01 |
| GNG5P3        | -0.26 | 1.77E-01 | -0.04 | 8.25E-01 |
| GTF2H2        | -0.24 | 2.11E-01 | 0.04  | 8.25E-01 |
| JMJD7         | -0.19 | 3.22E-01 | -0.04 | 8.25E-01 |
| KIFC1         | 0.15  | 4.36E-01 | 0.04  | 8.25E-01 |
| MAGI1-AS1     | -0.20 | 3.14E-01 | 0.04  | 8.25E-01 |
| NUP43         | -0.11 | 5.87E-01 | -0.04 | 8.25E-01 |
| PPM1G         | 0.06  | 7.61E-01 | 0.04  | 8.25E-01 |
| RAB39A        | 0.03  | 8.79E-01 | -0.04 | 8.25E-01 |
| RP11-321A17.6 | -0.21 | 2.74E-01 | -0.04 | 8.25E-01 |
| RP11-435F17.1 | 0.38  | 4.89E-02 | -0.04 | 8.25E-01 |
| RP11-552F3.10 | -0.07 | 7.25E-01 | -0.04 | 8.25E-01 |
| RP11-556H2.4  | -0.06 | 7.49E-01 | 0.04  | 8.25E-01 |
| RP11-56B16.1  | 0.05  | 7.82E-01 | 0.04  | 8.25E-01 |
| RP11-573M3.6  | -0.04 | 8.31E-01 | 0.04  | 8.25E-01 |
| RP11-618L22.1 | 0.19  | 3.39E-01 | 0.04  | 8.25E-01 |
| RP11-848P1.7  | 0.24  | 2.24E-01 | -0.04 | 8.25E-01 |
| RP3-324O17.7  | 0.05  | 7.99E-01 | -0.04 | 8.25E-01 |
| RPSAP54       | -0.10 | 6.15E-01 | -0.04 | 8.25E-01 |
| SAMD4B        | 0.02  | 9.05E-01 | -0.04 | 8.25E-01 |
| SLC22A25      | -0.24 | 2.26E-01 | 0.04  | 8.25E-01 |
| TAS2R12       | -0.24 | 2.16E-01 | 0.04  | 8.25E-01 |
| TMEM110-MUSTN | 0.30  | 1.15E-01 | -0.04 | 8.25E-01 |
| TMEM201       | 0.14  | 4.79E-01 | 0.04  | 8.25E-01 |



|                  |       |          |       |          |
|------------------|-------|----------|-------|----------|
| TMEM59           | 0.22  | 2.70E-01 | 0.04  | 8.25E-01 |
| U2AF2            | 0.14  | 4.79E-01 | 0.04  | 8.25E-01 |
| AC003002.6       | 0.24  | 2.12E-01 | -0.04 | 8.26E-01 |
| ATP5B            | 0.20  | 3.03E-01 | 0.04  | 8.26E-01 |
| BOLA2P2          | 0.07  | 7.24E-01 | 0.04  | 8.26E-01 |
| CACYBP           | -0.09 | 6.38E-01 | -0.04 | 8.26E-01 |
| CCDC22           | 0.33  | 9.09E-02 | 0.04  | 8.26E-01 |
| CDRT15           | 0.26  | 1.87E-01 | 0.04  | 8.26E-01 |
| CTD-3035K23.7    | -0.43 | 2.39E-02 | -0.04 | 8.26E-01 |
| CTNNB1           | -0.01 | 9.54E-01 | 0.04  | 8.26E-01 |
| FAM105A          | 0.49  | 7.99E-03 | -0.04 | 8.26E-01 |
| G33852           | -0.09 | 6.56E-01 | -0.04 | 8.26E-01 |
| HIST1H4F         | -0.23 | 2.50E-01 | 0.04  | 8.26E-01 |
| IL5              | -0.07 | 7.32E-01 | -0.04 | 8.26E-01 |
| KRTAP26-1        | -0.15 | 4.58E-01 | 0.04  | 8.26E-01 |
| LRRC70           | 0.22  | 2.50E-01 | -0.04 | 8.26E-01 |
| NCOA2            | -0.13 | 5.04E-01 | -0.04 | 8.26E-01 |
| POLR3D           | 0.14  | 4.67E-01 | -0.04 | 8.26E-01 |
| RP11-244N9.4     | -0.23 | 2.41E-01 | 0.04  | 8.26E-01 |
| RP11-290O12.2    | 0.06  | 7.67E-01 | -0.04 | 8.26E-01 |
| RP11-295D4.7     | -0.22 | 2.56E-01 | -0.04 | 8.26E-01 |
| RP11-332H18.3    | -0.36 | 6.11E-02 | -0.04 | 8.26E-01 |
| RP11-47J17.1     | 0.00  | 9.81E-01 | 0.04  | 8.26E-01 |
| RP11-661O13.1    | -0.23 | 2.40E-01 | 0.04  | 8.26E-01 |
| RP11-67L3.2      | 0.20  | 3.07E-01 | -0.04 | 8.26E-01 |
| RP13-39P12.3     | -0.18 | 3.70E-01 | -0.04 | 8.26E-01 |
| RP3-416H24.1     | 0.18  | 3.66E-01 | -0.04 | 8.26E-01 |
| SAA2             | 0.17  | 3.86E-01 | -0.04 | 8.26E-01 |
| TAF9B            | -0.07 | 7.21E-01 | 0.04  | 8.26E-01 |
| UBQLN4           | 0.08  | 6.84E-01 | 0.04  | 8.26E-01 |
| WDR5B            | -0.20 | 3.07E-01 | -0.04 | 8.26E-01 |
| XLOC_000757      | -0.39 | 4.21E-02 | -0.04 | 8.26E-01 |
| XLOC_010453      | -0.22 | 2.52E-01 | -0.04 | 8.26E-01 |
| (Xbac-BPG252P9.4 | -0.19 | 3.21E-01 | -0.04 | 8.26E-01 |
| ZADH2            | -0.41 | 2.84E-02 | 0.04  | 8.26E-01 |
| ZNF469           | -0.02 | 9.20E-01 | 0.04  | 8.26E-01 |
| ADGRE4P          | -0.14 | 4.79E-01 | -0.04 | 8.28E-01 |
| ADGRG3           | 0.03  | 8.77E-01 | -0.04 | 8.28E-01 |
| C21orf58         | -0.03 | 8.68E-01 | -0.04 | 8.28E-01 |
| CAMK4            | 0.04  | 8.21E-01 | 0.04  | 8.28E-01 |
| CDKN2A           | 0.19  | 3.22E-01 | 0.04  | 8.28E-01 |
| CH507-42P11.8    | -0.23 | 2.32E-01 | -0.04 | 8.28E-01 |
| CTC-218B8.3      | -0.40 | 3.44E-02 | 0.04  | 8.28E-01 |
| G17634           | 0.12  | 5.42E-01 | -0.04 | 8.28E-01 |
| G4026            | 0.37  | 5.31E-02 | -0.04 | 8.28E-01 |
| GPAM             | 0.17  | 3.82E-01 | 0.04  | 8.28E-01 |
| KCNE4            | -0.46 | 1.49E-02 | 0.04  | 8.28E-01 |

|               |       |          |       |          |
|---------------|-------|----------|-------|----------|
| MELK          | 0.13  | 5.15E-01 | -0.04 | 8.28E-01 |
| MLH1          | 0.10  | 6.17E-01 | -0.04 | 8.28E-01 |
| MST1P2        | 0.03  | 8.88E-01 | -0.04 | 8.28E-01 |
| RP11-481J2.2  | -0.04 | 8.30E-01 | 0.04  | 8.28E-01 |
| RP11-500G22.4 | -0.17 | 3.84E-01 | 0.04  | 8.28E-01 |
| RP11-87H9.4   | 0.10  | 6.31E-01 | -0.04 | 8.28E-01 |
| RP3-510L9.1   | -0.14 | 4.67E-01 | -0.04 | 8.28E-01 |
| RP5-966M1.6   | -0.18 | 3.64E-01 | -0.04 | 8.28E-01 |
| RP6-99M1.3    | 0.07  | 7.37E-01 | -0.04 | 8.28E-01 |
| RPL39P5       | 0.04  | 8.21E-01 | 0.04  | 8.28E-01 |
| RUSC1-AS1     | 0.16  | 4.29E-01 | -0.04 | 8.28E-01 |
| SMARCA5-AS1   | 0.00  | 9.97E-01 | -0.04 | 8.28E-01 |
| SNRPC         | 0.10  | 5.95E-01 | 0.04  | 8.28E-01 |
| XLOC_004697   | 0.06  | 7.77E-01 | -0.04 | 8.28E-01 |
| ANP32A        | -0.27 | 1.65E-01 | 0.04  | 8.29E-01 |
| AP000892.4    | 0.01  | 9.75E-01 | 0.04  | 8.29E-01 |
| FXN           | -0.02 | 9.03E-01 | 0.04  | 8.29E-01 |
| GLTSCR2       | 0.01  | 9.42E-01 | 0.04  | 8.29E-01 |
| GTF2IP12      | -0.11 | 5.86E-01 | 0.04  | 8.29E-01 |
| HDGFP1        | -0.19 | 3.41E-01 | 0.04  | 8.29E-01 |
| HIST1H4A      | -0.02 | 9.01E-01 | 0.04  | 8.29E-01 |
| IMP4          | 0.16  | 4.28E-01 | 0.04  | 8.29E-01 |
| NXPH3         | 0.07  | 7.23E-01 | 0.04  | 8.29E-01 |
| PENK          | -0.08 | 7.02E-01 | 0.04  | 8.29E-01 |
| RN7SL739P     | -0.06 | 7.75E-01 | 0.04  | 8.29E-01 |
| RNU6-623P     | -0.02 | 9.00E-01 | 0.04  | 8.29E-01 |
| RP11-103B5.4  | -0.30 | 1.25E-01 | 0.04  | 8.29E-01 |
| RP11-152L20.3 | -0.40 | 3.41E-02 | 0.04  | 8.29E-01 |
| RP11-570L15.1 | 0.01  | 9.48E-01 | 0.04  | 8.29E-01 |
| RP11-640N11.2 | 0.24  | 2.10E-01 | 0.04  | 8.29E-01 |
| RP11-734J24.1 | -0.19 | 3.42E-01 | 0.04  | 8.29E-01 |
| RPL14P1       | 0.03  | 8.65E-01 | 0.04  | 8.29E-01 |
| RSU1P2        | -0.16 | 4.17E-01 | 0.04  | 8.29E-01 |
| SVBP          | 0.02  | 9.29E-01 | 0.04  | 8.29E-01 |
| TTC39C        | -0.04 | 8.43E-01 | 0.04  | 8.29E-01 |
| ZNF33B        | 0.07  | 7.18E-01 | 0.04  | 8.29E-01 |
| ZNF780A       | 0.15  | 4.45E-01 | 0.04  | 8.29E-01 |
| AC007308.6    | -0.02 | 9.36E-01 | -0.04 | 8.29E-01 |
| DCAF17        | -0.01 | 9.61E-01 | -0.04 | 8.29E-01 |
| MAFK          | -0.48 | 9.05E-03 | -0.04 | 8.29E-01 |
| PGBD3         | 0.15  | 4.45E-01 | -0.04 | 8.29E-01 |
| RNU6-1062P    | -0.03 | 8.98E-01 | -0.04 | 8.29E-01 |
| RP1-161N10.1  | -0.17 | 3.76E-01 | -0.04 | 8.29E-01 |
| RP11-131L12.3 | 0.05  | 8.00E-01 | -0.04 | 8.29E-01 |
| RP11-142L4.3  | 0.14  | 4.90E-01 | -0.04 | 8.29E-01 |
| RP11-762H8.2  | -0.06 | 7.48E-01 | -0.04 | 8.29E-01 |
| RP4-569M23.2  | 0.00  | 9.94E-01 | -0.04 | 8.29E-01 |

|                       |       |          |       |          |
|-----------------------|-------|----------|-------|----------|
| <b>TMEM39A</b>        | -0.34 | 7.59E-02 | -0.04 | 8.29E-01 |
| <b>XLOC_005405</b>    | -0.30 | 1.25E-01 | -0.04 | 8.29E-01 |
| <b>ACAD8</b>          | 0.37  | 5.29E-02 | 0.04  | 8.30E-01 |
| <b>CHI3L2</b>         | 0.38  | 4.52E-02 | 0.04  | 8.30E-01 |
| <b>COX5A</b>          | 0.15  | 4.51E-01 | 0.04  | 8.30E-01 |
| <b>COX6A1P2</b>       | 0.31  | 1.09E-01 | 0.04  | 8.30E-01 |
| <b>G38278</b>         | 0.20  | 3.19E-01 | 0.04  | 8.30E-01 |
| <b>GRAMD1C</b>        | 0.15  | 4.54E-01 | 0.04  | 8.30E-01 |
| <b>INO80C</b>         | 0.26  | 1.75E-01 | 0.04  | 8.30E-01 |
| <b>KRTAP9-8</b>       | -0.11 | 5.79E-01 | 0.04  | 8.30E-01 |
| <b>LTA</b>            | 0.31  | 1.05E-01 | 0.04  | 8.30E-01 |
| <b>MAFB</b>           | -0.05 | 8.09E-01 | 0.04  | 8.30E-01 |
| <b>MIR135A1</b>       | -0.30 | 1.18E-01 | 0.04  | 8.30E-01 |
| <b>NUP54</b>          | 0.15  | 4.53E-01 | 0.04  | 8.30E-01 |
| <b>RP11-70L8.4</b>    | -0.33 | 8.90E-02 | 0.04  | 8.30E-01 |
| <b>SNHG9</b>          | 0.06  | 7.81E-01 | 0.04  | 8.30E-01 |
| <b>VRK2</b>           | 0.12  | 5.32E-01 | 0.04  | 8.30E-01 |
| <b>ALOXE3</b>         | -0.08 | 6.79E-01 | -0.04 | 8.30E-01 |
| <b>DIS3L2</b>         | -0.15 | 4.37E-01 | -0.04 | 8.30E-01 |
| <b>M6PR</b>           | 0.15  | 4.46E-01 | -0.04 | 8.30E-01 |
| <b>NAA15</b>          | 0.18  | 3.71E-01 | -0.04 | 8.30E-01 |
| <b>OLIG1</b>          | -0.05 | 8.04E-01 | -0.04 | 8.30E-01 |
| <b>PARD6G-AS1</b>     | 0.10  | 6.10E-01 | -0.04 | 8.30E-01 |
| <b>PHF2</b>           | 0.36  | 5.78E-02 | -0.04 | 8.30E-01 |
| <b>PP14571</b>        | 0.07  | 7.23E-01 | -0.04 | 8.30E-01 |
| <b>RP11-12D24.10</b>  | -0.11 | 5.75E-01 | -0.04 | 8.30E-01 |
| <b>RP11-274A11.3</b>  | -0.29 | 1.33E-01 | -0.04 | 8.30E-01 |
| <b>RP11-79P5.10</b>   | -0.16 | 4.16E-01 | -0.04 | 8.30E-01 |
| <b>RP5-1119A7.14</b>  | -0.12 | 5.45E-01 | -0.04 | 8.30E-01 |
| <b>RPL14</b>          | 0.13  | 5.19E-01 | -0.04 | 8.30E-01 |
| <b>SEC13</b>          | 0.03  | 8.97E-01 | -0.04 | 8.30E-01 |
| <b>3-Sep</b>          | -0.08 | 6.94E-01 | -0.04 | 8.30E-01 |
| <b>SLC22A9</b>        | -0.12 | 5.41E-01 | -0.04 | 8.30E-01 |
| <b>SMC6</b>           | 0.13  | 5.02E-01 | -0.04 | 8.30E-01 |
| <b>TBC1D1</b>         | 0.20  | 3.09E-01 | -0.04 | 8.30E-01 |
| <b>TMEM242</b>        | 0.34  | 7.97E-02 | -0.04 | 8.30E-01 |
| <b>TXNDC12-AS1</b>    | -0.16 | 4.26E-01 | -0.04 | 8.30E-01 |
| <b>UBE2D2</b>         | 0.19  | 3.34E-01 | -0.04 | 8.30E-01 |
| <b>VAX2</b>           | 0.01  | 9.71E-01 | -0.04 | 8.30E-01 |
| <b>ZNF154</b>         | -0.14 | 4.72E-01 | -0.04 | 8.30E-01 |
| <b>AC010522.1</b>     | 0.24  | 2.27E-01 | -0.04 | 8.31E-01 |
| <b>VKRD62P1-PARP4</b> | -0.01 | 9.58E-01 | -0.04 | 8.31E-01 |
| <b>ARHGEF12</b>       | -0.01 | 9.47E-01 | -0.04 | 8.31E-01 |
| <b>CCDC53</b>         | -0.18 | 3.49E-01 | -0.04 | 8.31E-01 |
| <b>CTD-3220F14.1</b>  | -0.13 | 5.17E-01 | -0.04 | 8.31E-01 |
| <b>FAM216A</b>        | -0.11 | 5.94E-01 | -0.04 | 8.31E-01 |
| <b>GS1-25M2.1</b>     | 0.34  | 7.59E-02 | -0.04 | 8.31E-01 |

|                |       |          |       |          |
|----------------|-------|----------|-------|----------|
| LAMTOR4        | -0.13 | 5.08E-01 | -0.04 | 8.31E-01 |
| LINC00907      | 0.06  | 7.78E-01 | -0.04 | 8.31E-01 |
| MED4           | -0.02 | 9.11E-01 | -0.04 | 8.31E-01 |
| PLEKHG5        | -0.14 | 4.86E-01 | -0.04 | 8.31E-01 |
| PRH2           | -0.33 | 8.51E-02 | -0.04 | 8.31E-01 |
| RASL11B        | 0.16  | 4.28E-01 | -0.04 | 8.31E-01 |
| RN7SKP217      | -0.30 | 1.15E-01 | -0.04 | 8.31E-01 |
| RN7SL801P      | 0.05  | 8.03E-01 | -0.04 | 8.31E-01 |
| RP11-104O19.4  | -0.13 | 4.95E-01 | -0.04 | 8.31E-01 |
| RP11-18F14.4   | 0.03  | 8.71E-01 | -0.04 | 8.31E-01 |
| RP11-225N10.3  | -0.02 | 9.05E-01 | -0.04 | 8.31E-01 |
| RP11-344N10.4  | 0.09  | 6.66E-01 | -0.04 | 8.31E-01 |
| RP11-454C18.1  | 0.15  | 4.34E-01 | -0.04 | 8.31E-01 |
| RP11-78A19.4   | -0.14 | 4.79E-01 | -0.04 | 8.31E-01 |
| RPUSD1         | 0.28  | 1.51E-01 | -0.04 | 8.31E-01 |
| SNRPCP4        | 0.10  | 6.06E-01 | -0.04 | 8.31E-01 |
| SOX15          | 0.10  | 6.11E-01 | -0.04 | 8.31E-01 |
| STAC           | -0.27 | 1.65E-01 | -0.04 | 8.31E-01 |
| TDRD1          | -0.19 | 3.42E-01 | -0.04 | 8.31E-01 |
| TTL11-IT1      | -0.24 | 2.23E-01 | -0.04 | 8.31E-01 |
| ZNF225         | -0.07 | 7.33E-01 | -0.04 | 8.31E-01 |
| DIABLO         | 0.04  | 8.39E-01 | 0.04  | 8.31E-01 |
| DNAH17         | -0.12 | 5.48E-01 | 0.04  | 8.31E-01 |
| FAM156A        | -0.08 | 6.79E-01 | 0.04  | 8.31E-01 |
| G5833          | 0.09  | 6.47E-01 | 0.04  | 8.31E-01 |
| KCNC1          | -0.41 | 2.99E-02 | 0.04  | 8.31E-01 |
| MEF2D          | -0.33 | 8.37E-02 | 0.04  | 8.31E-01 |
| PYY2           | 0.01  | 9.47E-01 | 0.04  | 8.31E-01 |
| RNU6-2         | 0.06  | 7.63E-01 | 0.04  | 8.31E-01 |
| RP11-277P12.10 | 0.04  | 8.57E-01 | 0.04  | 8.31E-01 |
| SCGB1A1        | -0.06 | 7.57E-01 | 0.04  | 8.31E-01 |
| SHMT2          | 0.22  | 2.67E-01 | 0.04  | 8.31E-01 |
| SNORD114-3     | -0.41 | 3.14E-02 | 0.04  | 8.31E-01 |
| TRIM39         | 0.14  | 4.63E-01 | 0.04  | 8.31E-01 |
| UBR7           | -0.05 | 7.98E-01 | 0.04  | 8.31E-01 |
| XLOC_004672    | -0.22 | 2.59E-01 | 0.04  | 8.31E-01 |
| AC084809.3     | -0.01 | 9.53E-01 | -0.04 | 8.32E-01 |
| BCO2           | 0.15  | 4.37E-01 | -0.04 | 8.32E-01 |
| C10orf105      | -0.09 | 6.46E-01 | -0.04 | 8.32E-01 |
| CAPS           | 0.02  | 9.14E-01 | 0.04  | 8.32E-01 |
| CCDC109B       | 0.10  | 5.95E-01 | 0.04  | 8.32E-01 |
| CD5L           | -0.09 | 6.32E-01 | -0.04 | 8.32E-01 |
| G30934         | -0.11 | 5.69E-01 | -0.04 | 8.32E-01 |
| GLA            | -0.22 | 2.64E-01 | -0.04 | 8.32E-01 |
| GLRX           | 0.24  | 2.21E-01 | -0.04 | 8.32E-01 |
| HIST1H1D       | 0.02  | 9.36E-01 | 0.04  | 8.32E-01 |
| HIST1H4L       | 0.04  | 8.50E-01 | -0.04 | 8.32E-01 |

|                |       |          |       |          |
|----------------|-------|----------|-------|----------|
| HMGB3          | 0.19  | 3.23E-01 | -0.04 | 8.32E-01 |
| HMGCLL1        | -0.40 | 3.47E-02 | -0.04 | 8.32E-01 |
| HNRNPLP2       | -0.09 | 6.59E-01 | -0.04 | 8.32E-01 |
| HYOU1          | 0.06  | 7.76E-01 | 0.04  | 8.32E-01 |
| IQCG           | -0.30 | 1.20E-01 | 0.04  | 8.32E-01 |
| LINC01167      | -0.06 | 7.54E-01 | -0.04 | 8.32E-01 |
| LSM14A         | 0.02  | 9.09E-01 | -0.04 | 8.32E-01 |
| MGAT4C         | 0.20  | 3.15E-01 | -0.04 | 8.32E-01 |
| NF2            | 0.14  | 4.81E-01 | -0.04 | 8.32E-01 |
| PCDH9          | 0.19  | 3.27E-01 | 0.04  | 8.32E-01 |
| PLEKHA8        | 0.02  | 9.08E-01 | 0.04  | 8.32E-01 |
| PRDX1P1        | -0.09 | 6.39E-01 | 0.04  | 8.32E-01 |
| PTCHD1         | -0.01 | 9.71E-01 | -0.04 | 8.32E-01 |
| RNU6-378P      | -0.09 | 6.60E-01 | -0.04 | 8.32E-01 |
| RP1-56K13.2    | -0.22 | 2.53E-01 | -0.04 | 8.32E-01 |
| RP1-95L4.2     | -0.17 | 3.96E-01 | -0.04 | 8.32E-01 |
| RP11-1191J2.5  | -0.09 | 6.57E-01 | -0.04 | 8.32E-01 |
| RP11-1223D19.3 | -0.24 | 2.17E-01 | 0.04  | 8.32E-01 |
| RP11-154J22.1  | -0.06 | 7.81E-01 | -0.04 | 8.32E-01 |
| RP11-2E17.2    | 0.12  | 5.52E-01 | -0.04 | 8.32E-01 |
| RP11-487E1.2   | 0.04  | 8.52E-01 | -0.04 | 8.32E-01 |
| RP11-53M11.3   | -0.05 | 7.91E-01 | -0.04 | 8.32E-01 |
| RP11-650J17.1  | 0.38  | 4.85E-02 | 0.04  | 8.32E-01 |
| RP11-650L12.1  | 0.19  | 3.39E-01 | -0.04 | 8.32E-01 |
| RP11-733O18.1  | -0.19 | 3.23E-01 | -0.04 | 8.32E-01 |
| RP11-736K20.4  | -0.39 | 4.10E-02 | 0.04  | 8.32E-01 |
| SIDT2          | -0.02 | 9.13E-01 | -0.04 | 8.32E-01 |
| SOX7           | 0.00  | 9.99E-01 | -0.04 | 8.32E-01 |
| SPTB           | -0.01 | 9.68E-01 | -0.04 | 8.32E-01 |
| STRN           | 0.15  | 4.41E-01 | -0.04 | 8.32E-01 |
| SUGP2          | -0.06 | 7.75E-01 | -0.04 | 8.32E-01 |
| TMEM167B       | 0.08  | 6.72E-01 | -0.04 | 8.32E-01 |
| WDR82          | 0.23  | 2.43E-01 | 0.04  | 8.32E-01 |
| ZCCHC3         | -0.11 | 5.82E-01 | -0.04 | 8.32E-01 |
| AC004791.2     | 0.02  | 9.17E-01 | 0.04  | 8.33E-01 |
| AC005740.5     | 0.09  | 6.35E-01 | 0.04  | 8.33E-01 |
| AC007091.1     | -0.29 | 1.40E-01 | 0.04  | 8.33E-01 |
| AC016831.7     | -0.11 | 5.78E-01 | 0.04  | 8.33E-01 |
| AC068831.6     | -0.05 | 8.13E-01 | -0.04 | 8.33E-01 |
| ACTR2          | 0.12  | 5.59E-01 | 0.04  | 8.33E-01 |
| C19orf53       | 0.18  | 3.49E-01 | 0.04  | 8.33E-01 |
| CCDC121        | -0.16 | 4.29E-01 | -0.04 | 8.33E-01 |
| COQ3           | 0.19  | 3.34E-01 | -0.04 | 8.33E-01 |
| DAPK1-IT1      | -0.09 | 6.63E-01 | -0.04 | 8.33E-01 |
| EIF2S2         | 0.12  | 5.45E-01 | -0.04 | 8.33E-01 |
| G16268         | 0.14  | 4.77E-01 | -0.04 | 8.33E-01 |
| G29706         | -0.31 | 1.08E-01 | 0.04  | 8.33E-01 |

|                  |       |          |       |          |
|------------------|-------|----------|-------|----------|
| KRTAP1-1         | -0.05 | 8.10E-01 | 0.04  | 8.33E-01 |
| LPP-AS2          | 0.12  | 5.55E-01 | -0.04 | 8.33E-01 |
| MAPK12           | 0.00  | 9.83E-01 | -0.04 | 8.33E-01 |
| MAX              | 0.13  | 5.21E-01 | 0.04  | 8.33E-01 |
| MRPL2            | 0.07  | 7.40E-01 | -0.04 | 8.33E-01 |
| MRPL38           | -0.10 | 6.14E-01 | -0.04 | 8.33E-01 |
| MSH5             | -0.20 | 3.10E-01 | -0.04 | 8.33E-01 |
| PATZ1            | -0.11 | 5.70E-01 | -0.04 | 8.33E-01 |
| POM121C          | 0.11  | 5.65E-01 | -0.04 | 8.33E-01 |
| PPP2CA           | 0.05  | 7.97E-01 | -0.04 | 8.33E-01 |
| PPP2R5B          | 0.05  | 7.83E-01 | 0.04  | 8.33E-01 |
| RAB3GAP2         | 0.07  | 7.18E-01 | 0.04  | 8.33E-01 |
| RAD17            | 0.09  | 6.37E-01 | 0.04  | 8.33E-01 |
| RNASEH1          | 0.05  | 7.86E-01 | 0.04  | 8.33E-01 |
| RP11-109N23.6    | -0.38 | 4.56E-02 | 0.04  | 8.33E-01 |
| RP11-158M2.2     | 0.04  | 8.57E-01 | -0.04 | 8.33E-01 |
| RP11-210H10__A.1 | -0.06 | 7.61E-01 | -0.04 | 8.33E-01 |
| RP11-324E6.10    | -0.08 | 6.89E-01 | -0.04 | 8.33E-01 |
| RPL7AP4          | -0.54 | 2.77E-03 | 0.04  | 8.33E-01 |
| SDAD1P1          | -0.05 | 8.13E-01 | 0.04  | 8.33E-01 |
| SLIT3            | -0.16 | 4.24E-01 | 0.04  | 8.33E-01 |
| SPSB2            | 0.02  | 9.20E-01 | -0.04 | 8.33E-01 |
| STK17B           | 0.17  | 3.95E-01 | 0.04  | 8.33E-01 |
| TUBGCP4          | -0.24 | 2.14E-01 | -0.04 | 8.33E-01 |
| UBE2E2           | 0.16  | 4.30E-01 | -0.04 | 8.33E-01 |
| WBP4             | 0.00  | 9.94E-01 | -0.04 | 8.33E-01 |
| WDFY3-AS2        | -0.20 | 3.11E-01 | 0.04  | 8.33E-01 |
| XLOC_009603      | 0.22  | 2.63E-01 | 0.04  | 8.33E-01 |
| Xbac-B476C20.14  | -0.03 | 8.91E-01 | 0.04  | 8.33E-01 |
| ZNF837           | 0.02  | 9.05E-01 | -0.04 | 8.33E-01 |
| ABLIM1           | -0.16 | 4.30E-01 | -0.04 | 8.35E-01 |
| ALKBH3           | 0.11  | 5.88E-01 | -0.04 | 8.35E-01 |
| ARPC3P5          | -0.22 | 2.68E-01 | 0.04  | 8.35E-01 |
| BZRAP1-AS1       | -0.01 | 9.78E-01 | -0.04 | 8.35E-01 |
| CACNG4           | -0.35 | 7.01E-02 | -0.04 | 8.35E-01 |
| CPNE7            | 0.03  | 8.69E-01 | -0.04 | 8.35E-01 |
| DEFB1            | 0.17  | 3.74E-01 | 0.04  | 8.35E-01 |
| DPY19L4          | 0.18  | 3.54E-01 | -0.04 | 8.35E-01 |
| FAM83G           | 0.24  | 2.17E-01 | 0.04  | 8.35E-01 |
| FBXL12           | 0.06  | 7.44E-01 | -0.04 | 8.35E-01 |
| G32314           | 0.15  | 4.38E-01 | -0.04 | 8.35E-01 |
| GOLGA5P1         | -0.06 | 7.69E-01 | 0.04  | 8.35E-01 |
| GPR75-ASB3       | -0.11 | 5.61E-01 | -0.04 | 8.35E-01 |
| MRGPRX2          | -0.17 | 3.98E-01 | -0.04 | 8.35E-01 |
| OXCT1            | 0.16  | 4.12E-01 | 0.04  | 8.35E-01 |
| PRR4             | -0.09 | 6.66E-01 | -0.04 | 8.35E-01 |
| RAB40AL          | -0.10 | 5.96E-01 | -0.04 | 8.35E-01 |

|                |       |          |       |          |
|----------------|-------|----------|-------|----------|
| RANP1          | 0.36  | 5.68E-02 | 0.04  | 8.35E-01 |
| RBM24          | -0.09 | 6.43E-01 | -0.04 | 8.35E-01 |
| RING1          | 0.05  | 7.93E-01 | 0.04  | 8.35E-01 |
| RNU6-312P      | -0.25 | 2.02E-01 | 0.04  | 8.35E-01 |
| RNU6-874P      | -0.09 | 6.35E-01 | -0.04 | 8.35E-01 |
| RP1-121G13.3   | -0.39 | 4.03E-02 | -0.04 | 8.35E-01 |
| RP11-180C16.1  | 0.00  | 9.99E-01 | -0.04 | 8.35E-01 |
| RP11-264B17.4  | 0.10  | 6.13E-01 | -0.04 | 8.35E-01 |
| RP11-267J23.4  | -0.25 | 1.93E-01 | -0.04 | 8.35E-01 |
| RP11-384L8.2   | -0.28 | 1.51E-01 | 0.04  | 8.35E-01 |
| RP11-474L11.5  | -0.17 | 3.84E-01 | 0.04  | 8.35E-01 |
| RP3-406A7.7    | -0.23 | 2.36E-01 | 0.04  | 8.35E-01 |
| RP5-1107A17.4  | -0.20 | 2.98E-01 | -0.04 | 8.35E-01 |
| SIGLEC11       | -0.26 | 1.87E-01 | 0.04  | 8.35E-01 |
| SNRPGP14       | -0.21 | 2.80E-01 | 0.04  | 8.35E-01 |
| SRGAP2         | -0.35 | 6.55E-02 | -0.04 | 8.35E-01 |
| SUMO2P1        | 0.06  | 7.43E-01 | -0.04 | 8.35E-01 |
| TTC24          | 0.17  | 3.93E-01 | -0.04 | 8.35E-01 |
| U51244.2       | -0.04 | 8.43E-01 | 0.04  | 8.35E-01 |
| UGDH           | 0.06  | 7.46E-01 | -0.04 | 8.35E-01 |
| AC008850.3     | -0.19 | 3.33E-01 | -0.04 | 8.36E-01 |
| AC090945.1     | 0.01  | 9.42E-01 | 0.04  | 8.36E-01 |
| ADSSL1         | -0.37 | 5.01E-02 | 0.04  | 8.36E-01 |
| C6orf141       | -0.01 | 9.72E-01 | 0.04  | 8.36E-01 |
| CCDC149        | -0.17 | 3.75E-01 | 0.04  | 8.36E-01 |
| CCNA2          | 0.12  | 5.33E-01 | 0.04  | 8.36E-01 |
| CTB-193M12.3   | -0.14 | 4.89E-01 | 0.04  | 8.36E-01 |
| CTB-5506.12    | -0.08 | 6.69E-01 | 0.04  | 8.36E-01 |
| DISC1-IT1      | -0.14 | 4.93E-01 | 0.04  | 8.36E-01 |
| G1580          | 0.13  | 5.14E-01 | 0.04  | 8.36E-01 |
| G26933         | -0.17 | 3.93E-01 | 0.04  | 8.36E-01 |
| G30718         | 0.26  | 1.83E-01 | -0.04 | 8.36E-01 |
| G42703         | -0.16 | 4.15E-01 | -0.04 | 8.36E-01 |
| G511           | 0.06  | 7.78E-01 | -0.04 | 8.36E-01 |
| HSPA5          | 0.01  | 9.79E-01 | 0.04  | 8.36E-01 |
| IGLV1-40       | 0.34  | 7.51E-02 | -0.04 | 8.36E-01 |
| LINC00449      | 0.01  | 9.45E-01 | 0.04  | 8.36E-01 |
| MIR378H        | 0.34  | 7.54E-02 | 0.04  | 8.36E-01 |
| MRTO4          | 0.15  | 4.39E-01 | -0.04 | 8.36E-01 |
| MS4A2          | -0.17 | 3.89E-01 | -0.04 | 8.36E-01 |
| NELFE          | 0.04  | 8.31E-01 | 0.04  | 8.36E-01 |
| NPHP3-ACAD11   | -0.05 | 7.98E-01 | -0.04 | 8.36E-01 |
| OSTM1          | 0.00  | 9.80E-01 | -0.04 | 8.36E-01 |
| RNU6-315P      | 0.41  | 3.18E-02 | -0.04 | 8.36E-01 |
| RNU6-422P      | -0.11 | 5.78E-01 | -0.04 | 8.36E-01 |
| RNU7-16P       | -0.06 | 7.60E-01 | -0.04 | 8.36E-01 |
| RP11-347C12.10 | -0.03 | 8.82E-01 | -0.04 | 8.36E-01 |

|               |       |          |       |          |
|---------------|-------|----------|-------|----------|
| RP11-357N13.2 | -0.33 | 8.67E-02 | 0.04  | 8.36E-01 |
| RP11-44F21.5  | -0.07 | 7.07E-01 | -0.04 | 8.36E-01 |
| RP11-48B3.5   | 0.06  | 7.45E-01 | -0.04 | 8.36E-01 |
| RP11-712B9.2  | 0.20  | 2.99E-01 | 0.04  | 8.36E-01 |
| SPICE1        | -0.21 | 2.75E-01 | 0.04  | 8.36E-01 |
| THAP5P1       | 0.26  | 1.82E-01 | 0.04  | 8.36E-01 |
| TIAM2         | -0.25 | 2.04E-01 | -0.04 | 8.36E-01 |
| TMED2         | 0.20  | 3.18E-01 | -0.04 | 8.36E-01 |
| XRN2          | 0.18  | 3.70E-01 | -0.04 | 8.36E-01 |
| AP000857.2    | 0.07  | 7.26E-01 | -0.04 | 8.37E-01 |
| APCDD1L       | -0.19 | 3.23E-01 | -0.04 | 8.37E-01 |
| ARHGEF18      | 0.01  | 9.46E-01 | -0.04 | 8.37E-01 |
| ARNTL2-AS1    | 0.08  | 6.95E-01 | 0.04  | 8.37E-01 |
| CHRNA10       | 0.19  | 3.36E-01 | 0.04  | 8.37E-01 |
| CTC-332L22.1  | -0.07 | 7.20E-01 | 0.04  | 8.37E-01 |
| CTC-529I10.2  | -0.19 | 3.39E-01 | -0.04 | 8.37E-01 |
| EBLN2         | -0.08 | 6.93E-01 | -0.04 | 8.37E-01 |
| GPR79         | 0.03  | 8.98E-01 | -0.04 | 8.37E-01 |
| INTS10        | -0.07 | 7.24E-01 | 0.04  | 8.37E-01 |
| ISPD          | 0.39  | 3.97E-02 | 0.04  | 8.37E-01 |
| LINC01094     | 0.22  | 2.58E-01 | -0.04 | 8.37E-01 |
| LINC01587     | -0.06 | 7.79E-01 | -0.04 | 8.37E-01 |
| MCM3AP-AS1    | 0.28  | 1.56E-01 | -0.04 | 8.37E-01 |
| MEX3C         | 0.10  | 6.20E-01 | -0.04 | 8.37E-01 |
| MIR548V       | -0.08 | 6.89E-01 | -0.04 | 8.37E-01 |
| OR52B6        | -0.19 | 3.44E-01 | 0.04  | 8.37E-01 |
| PCAT2         | -0.21 | 2.81E-01 | 0.04  | 8.37E-01 |
| PLPP7         | -0.05 | 8.16E-01 | 0.04  | 8.37E-01 |
| PLXNA4        | -0.07 | 7.21E-01 | 0.04  | 8.37E-01 |
| PRAM1         | 0.33  | 8.37E-02 | -0.04 | 8.37E-01 |
| RAD54L        | 0.06  | 7.69E-01 | -0.04 | 8.37E-01 |
| RNU7-45P      | -0.16 | 4.29E-01 | 0.04  | 8.37E-01 |
| RP11-133K1.11 | 0.20  | 3.04E-01 | 0.04  | 8.37E-01 |
| RP11-161I2.1  | -0.10 | 5.98E-01 | 0.04  | 8.37E-01 |
| RP11-347P5.1  | 0.17  | 3.90E-01 | 0.04  | 8.37E-01 |
| RP11-382A20.5 | 0.11  | 5.90E-01 | -0.04 | 8.37E-01 |
| RP11-406H21.2 | 0.17  | 3.83E-01 | 0.04  | 8.37E-01 |
| RP11-780K2.1  | -0.25 | 2.08E-01 | -0.04 | 8.37E-01 |
| RPL13P12      | 0.13  | 5.06E-01 | -0.04 | 8.37E-01 |
| RUVBL2        | 0.09  | 6.36E-01 | 0.04  | 8.37E-01 |
| SETD3         | 0.42  | 2.49E-02 | 0.04  | 8.37E-01 |
| SIX4          | 0.07  | 7.15E-01 | -0.04 | 8.37E-01 |
| SLC43A3       | 0.31  | 1.08E-01 | 0.04  | 8.37E-01 |
| SPATA32       | -0.15 | 4.58E-01 | -0.04 | 8.37E-01 |
| WTAPP1        | 0.24  | 2.21E-01 | -0.04 | 8.37E-01 |
| ZNF414        | -0.09 | 6.34E-01 | 0.04  | 8.37E-01 |
| AC007000.10   | 0.11  | 5.66E-01 | -0.04 | 8.38E-01 |



|                      |       |          |       |          |
|----------------------|-------|----------|-------|----------|
| <b>AC110769.3</b>    | -0.05 | 7.88E-01 | 0.04  | 8.38E-01 |
| <b>ACTR8</b>         | 0.10  | 6.25E-01 | 0.04  | 8.38E-01 |
| <b>ARFGAP2</b>       | 0.06  | 7.71E-01 | 0.04  | 8.38E-01 |
| <b>ATAD3C</b>        | 0.29  | 1.35E-01 | -0.04 | 8.38E-01 |
| <b>BAIAP2L2</b>      | 0.04  | 8.29E-01 | 0.04  | 8.38E-01 |
| <b>BDNF</b>          | -0.17 | 3.94E-01 | 0.04  | 8.38E-01 |
| <b>C1orf56</b>       | -0.14 | 4.66E-01 | 0.04  | 8.38E-01 |
| <b>CELF1</b>         | 0.06  | 7.69E-01 | -0.04 | 8.38E-01 |
| <b>CENPO</b>         | -0.08 | 6.74E-01 | 0.04  | 8.38E-01 |
| <b>CHST15</b>        | 0.31  | 1.04E-01 | -0.04 | 8.38E-01 |
| <b>CTD-2008L17.2</b> | -0.27 | 1.62E-01 | -0.04 | 8.38E-01 |
| <b>DYNC1H1</b>       | -0.19 | 3.46E-01 | 0.04  | 8.38E-01 |
| <b>EML1</b>          | -0.27 | 1.71E-01 | 0.04  | 8.38E-01 |
| <b>G13086</b>        | 0.13  | 5.05E-01 | 0.04  | 8.38E-01 |
| <b>HIC1</b>          | -0.36 | 5.82E-02 | -0.04 | 8.38E-01 |
| <b>HIPK2</b>         | 0.18  | 3.49E-01 | 0.04  | 8.38E-01 |
| <b>KCNQ5</b>         | -0.16 | 4.24E-01 | -0.04 | 8.38E-01 |
| <b>MEG3</b>          | -0.26 | 1.85E-01 | -0.04 | 8.38E-01 |
| <b>NGFR</b>          | 0.24  | 2.28E-01 | 0.04  | 8.38E-01 |
| <b>OLFM5P</b>        | -0.10 | 6.29E-01 | 0.04  | 8.38E-01 |
| <b>PDAP1</b>         | 0.12  | 5.43E-01 | 0.04  | 8.38E-01 |
| <b>PLCB1</b>         | -0.15 | 4.58E-01 | 0.04  | 8.38E-01 |
| <b>RNU7-181P</b>     | -0.06 | 7.70E-01 | -0.04 | 8.38E-01 |
| <b>RP11-177G23.1</b> | -0.19 | 3.38E-01 | -0.04 | 8.38E-01 |
| <b>RP11-216B9.6</b>  | -0.02 | 9.13E-01 | 0.04  | 8.38E-01 |
| <b>RP11-231G3.1</b>  | -0.03 | 8.71E-01 | -0.04 | 8.38E-01 |
| <b>RP11-298D21.2</b> | -0.24 | 2.09E-01 | -0.04 | 8.38E-01 |
| <b>RP11-345N11.1</b> | 0.11  | 5.68E-01 | 0.04  | 8.38E-01 |
| <b>RP11-440D17.4</b> | 0.06  | 7.53E-01 | 0.04  | 8.38E-01 |
| <b>RP11-44M6.3</b>   | -0.16 | 4.19E-01 | 0.04  | 8.38E-01 |
| <b>RP11-573D15.9</b> | -0.08 | 6.74E-01 | 0.04  | 8.38E-01 |
| <b>RP11-603J24.5</b> | -0.33 | 8.24E-02 | -0.04 | 8.38E-01 |
| <b>RP11-661G16.2</b> | -0.35 | 6.80E-02 | -0.04 | 8.38E-01 |
| <b>RP5-881P19.7</b>  | 0.14  | 4.71E-01 | -0.04 | 8.38E-01 |
| <b>RPS24</b>         | 0.12  | 5.58E-01 | -0.04 | 8.38E-01 |
| <b>SHISA6</b>        | 0.19  | 3.32E-01 | 0.04  | 8.38E-01 |
| <b>SUMO2P17</b>      | 0.11  | 5.94E-01 | 0.04  | 8.38E-01 |
| <b>XPA</b>           | 0.17  | 4.00E-01 | 0.04  | 8.38E-01 |
| <b>ZBTB20</b>        | -0.40 | 3.63E-02 | 0.04  | 8.38E-01 |
| <b>ZDHHC14</b>       | 0.10  | 6.01E-01 | -0.04 | 8.38E-01 |
| <b>AC005154.8</b>    | -0.20 | 3.14E-01 | 0.04  | 8.39E-01 |
| <b>AC018766.4</b>    | 0.09  | 6.52E-01 | 0.04  | 8.39E-01 |
| <b>ANKRD11</b>       | 0.10  | 6.29E-01 | 0.04  | 8.39E-01 |
| <b>CDC37L1-AS1</b>   | 0.09  | 6.62E-01 | 0.04  | 8.39E-01 |
| <b>DRG1</b>          | 0.06  | 7.46E-01 | 0.04  | 8.39E-01 |
| <b>EWSAT1</b>        | -0.19 | 3.40E-01 | 0.04  | 8.39E-01 |
| <b>FAM205C</b>       | -0.19 | 3.33E-01 | 0.04  | 8.39E-01 |

|               |       |          |       |          |
|---------------|-------|----------|-------|----------|
| FAM213A       | 0.04  | 8.39E-01 | 0.04  | 8.39E-01 |
| KIAA1755      | -0.13 | 5.05E-01 | 0.04  | 8.39E-01 |
| LINC00276     | 0.11  | 5.80E-01 | 0.04  | 8.39E-01 |
| RN7SL65P      | 0.12  | 5.51E-01 | 0.04  | 8.39E-01 |
| RNU1-124P     | 0.32  | 9.90E-02 | 0.04  | 8.39E-01 |
| RP11-1000B6.7 | -0.26 | 1.84E-01 | 0.04  | 8.39E-01 |
| RP11-248G5.9  | -0.02 | 9.23E-01 | 0.04  | 8.39E-01 |
| RP11-291I6.2  | -0.10 | 6.04E-01 | 0.04  | 8.39E-01 |
| RP11-401P9.4  | -0.07 | 7.13E-01 | 0.04  | 8.39E-01 |
| RP11-452N17.1 | 0.05  | 7.96E-01 | 0.04  | 8.39E-01 |
| RPS20P15      | -0.13 | 5.24E-01 | 0.04  | 8.39E-01 |
| SLC9A6        | 0.08  | 6.76E-01 | 0.04  | 8.39E-01 |
| AC005288.1    | -0.14 | 4.85E-01 | -0.04 | 8.39E-01 |
| AGBL5-IT1     | 0.13  | 4.95E-01 | -0.04 | 8.39E-01 |
| DGCR6         | 0.17  | 3.86E-01 | -0.04 | 8.39E-01 |
| EIF3C         | 0.21  | 2.81E-01 | -0.04 | 8.39E-01 |
| G15372        | -0.22 | 2.68E-01 | -0.04 | 8.39E-01 |
| LINC00612     | -0.29 | 1.30E-01 | -0.04 | 8.39E-01 |
| MLLT4-AS1     | 0.20  | 3.06E-01 | -0.04 | 8.39E-01 |
| MYOC          | -0.13 | 4.95E-01 | -0.04 | 8.39E-01 |
| PDCD7         | 0.19  | 3.29E-01 | -0.04 | 8.39E-01 |
| RP11-229P13.2 | 0.02  | 9.38E-01 | -0.04 | 8.39E-01 |
| RP11-299G20.5 | 0.11  | 5.61E-01 | -0.04 | 8.39E-01 |
| RP11-532F6.5  | 0.02  | 9.35E-01 | -0.04 | 8.39E-01 |
| RP11-680F8.3  | -0.12 | 5.51E-01 | -0.04 | 8.39E-01 |
| RP11-80H18.4  | 0.13  | 5.10E-01 | -0.04 | 8.39E-01 |
| RPL7P9        | 0.00  | 9.80E-01 | -0.04 | 8.39E-01 |
| SCFD1         | 0.20  | 3.05E-01 | -0.04 | 8.39E-01 |
| SPRN          | 0.08  | 7.01E-01 | -0.04 | 8.39E-01 |
| THSD7B        | -0.42 | 2.73E-02 | -0.04 | 8.39E-01 |
| TMPRSS12      | -0.23 | 2.36E-01 | -0.04 | 8.39E-01 |
| TPGS2         | 0.09  | 6.44E-01 | -0.04 | 8.39E-01 |
| XLOC_008811   | 0.28  | 1.48E-01 | -0.04 | 8.39E-01 |
| ADAMTSL1      | -0.25 | 2.04E-01 | -0.04 | 8.41E-01 |
| ANKS3         | -0.14 | 4.83E-01 | -0.04 | 8.41E-01 |
| AP2B1         | -0.15 | 4.57E-01 | 0.04  | 8.41E-01 |
| CLEC2D        | 0.22  | 2.60E-01 | 0.04  | 8.41E-01 |
| CLEC4A        | -0.03 | 8.74E-01 | 0.04  | 8.41E-01 |
| CSF3          | 0.19  | 3.33E-01 | 0.04  | 8.41E-01 |
| DYNLL2        | 0.02  | 9.17E-01 | 0.04  | 8.41E-01 |
| EIF4BP7       | 0.14  | 4.81E-01 | -0.04 | 8.41E-01 |
| FBXO22        | 0.11  | 5.93E-01 | -0.04 | 8.41E-01 |
| FPR1          | 0.15  | 4.31E-01 | -0.04 | 8.41E-01 |
| GGCX          | 0.01  | 9.64E-01 | 0.04  | 8.41E-01 |
| ITGAD         | 0.04  | 8.28E-01 | 0.04  | 8.41E-01 |
| NDST3         | 0.23  | 2.42E-01 | -0.04 | 8.41E-01 |
| NOMO2         | -0.13 | 5.01E-01 | -0.04 | 8.41E-01 |

|                |       |          |       |          |
|----------------|-------|----------|-------|----------|
| PLCE1-AS2      | -0.36 | 5.78E-02 | 0.04  | 8.41E-01 |
| PLET1          | -0.19 | 3.23E-01 | 0.04  | 8.41E-01 |
| PMPCA          | 0.19  | 3.42E-01 | 0.04  | 8.41E-01 |
| RP11-117L5.3   | -0.03 | 8.87E-01 | -0.04 | 8.41E-01 |
| RP11-277I20.3  | 0.07  | 7.20E-01 | -0.04 | 8.41E-01 |
| RP11-347C12.12 | -0.33 | 8.37E-02 | -0.04 | 8.41E-01 |
| RP11-393I2.2   | 0.18  | 3.52E-01 | -0.04 | 8.41E-01 |
| RP11-541N10.3  | 0.24  | 2.10E-01 | 0.04  | 8.41E-01 |
| RP11-927P21.2  | -0.10 | 6.03E-01 | -0.04 | 8.41E-01 |
| SUPT4H1        | 0.05  | 8.11E-01 | 0.04  | 8.41E-01 |
| TCTEX1D2       | 0.14  | 4.72E-01 | 0.04  | 8.41E-01 |
| ZNF699         | -0.06 | 7.65E-01 | -0.04 | 8.41E-01 |
| ZSCAN4         | -0.10 | 6.27E-01 | -0.04 | 8.41E-01 |
| ATG7           | 0.10  | 6.13E-01 | 0.04  | 8.42E-01 |
| CDC42SE1       | 0.16  | 4.25E-01 | 0.04  | 8.42E-01 |
| EHD1           | 0.02  | 9.10E-01 | 0.04  | 8.42E-01 |
| KRT8P29        | 0.16  | 4.03E-01 | 0.04  | 8.42E-01 |
| LINC00239      | 0.19  | 3.27E-01 | 0.04  | 8.42E-01 |
| LINC00840      | -0.42 | 2.62E-02 | 0.04  | 8.42E-01 |
| LINC01239      | -0.09 | 6.45E-01 | 0.04  | 8.42E-01 |
| OR7D2          | -0.13 | 4.93E-01 | 0.04  | 8.42E-01 |
| RP11-488I20.8  | 0.06  | 7.71E-01 | 0.04  | 8.42E-01 |
| RP3-508I15.14  | -0.18 | 3.60E-01 | 0.04  | 8.42E-01 |
| SENP5          | 0.24  | 2.27E-01 | 0.04  | 8.42E-01 |
| SPDYE3         | 0.14  | 4.85E-01 | 0.04  | 8.42E-01 |
| TMEM145        | 0.16  | 4.02E-01 | 0.04  | 8.42E-01 |
| TTC17          | -0.08 | 6.82E-01 | 0.04  | 8.42E-01 |
| XLOC_000648    | -0.01 | 9.57E-01 | 0.04  | 8.42E-01 |
| XPO5           | 0.14  | 4.76E-01 | 0.04  | 8.42E-01 |
| ZFP1           | 0.02  | 9.09E-01 | 0.04  | 8.42E-01 |
| bP-2171C21.6   | -0.27 | 1.72E-01 | 0.04  | 8.42E-01 |
| AC002116.7     | -0.25 | 2.00E-01 | -0.04 | 8.42E-01 |
| AC007969.5     | 0.10  | 6.22E-01 | -0.04 | 8.42E-01 |
| ARHGAP27       | 0.17  | 3.74E-01 | -0.04 | 8.42E-01 |
| CTD-2529P6.3   | -0.08 | 6.96E-01 | -0.04 | 8.42E-01 |
| DDX54          | 0.20  | 3.05E-01 | -0.04 | 8.42E-01 |
| HID1           | -0.25 | 2.06E-01 | -0.04 | 8.42E-01 |
| HMG1P8         | -0.07 | 7.10E-01 | -0.04 | 8.42E-01 |
| KLRC4-KLRK1    | -0.15 | 4.42E-01 | -0.04 | 8.42E-01 |
| ME2            | 0.11  | 5.61E-01 | -0.04 | 8.42E-01 |
| NAMPT          | 0.15  | 4.47E-01 | -0.04 | 8.42E-01 |
| PCSK4          | -0.13 | 5.17E-01 | -0.04 | 8.42E-01 |
| PHF13          | 0.18  | 3.70E-01 | -0.04 | 8.42E-01 |
| PSORS1C3       | -0.16 | 4.26E-01 | -0.04 | 8.42E-01 |
| RNA5SP37       | -0.15 | 4.39E-01 | -0.04 | 8.42E-01 |
| RP11-366M4.11  | 0.16  | 4.18E-01 | -0.04 | 8.42E-01 |
| RP11-44F14.7   | 0.10  | 5.95E-01 | -0.04 | 8.42E-01 |

|                      |       |          |       |          |
|----------------------|-------|----------|-------|----------|
| <b>RP11-467L13.7</b> | 0.26  | 1.74E-01 | -0.04 | 8.42E-01 |
| <b>RP11-473O4.3</b>  | 0.22  | 2.59E-01 | -0.04 | 8.42E-01 |
| <b>RP11-708J19.1</b> | 0.19  | 3.36E-01 | -0.04 | 8.42E-01 |
| <b>RP13-225O21.2</b> | -0.37 | 4.98E-02 | -0.04 | 8.42E-01 |
| <b>RP5-1024G6.5</b>  | 0.13  | 4.97E-01 | -0.04 | 8.42E-01 |
| <b>SLC16A4</b>       | 0.02  | 9.10E-01 | -0.04 | 8.42E-01 |
| <b>SRSF10P1</b>      | -0.21 | 2.86E-01 | -0.04 | 8.42E-01 |
| <b>TGIF2P1</b>       | 0.18  | 3.67E-01 | -0.04 | 8.42E-01 |
| <b>TLE1</b>          | -0.29 | 1.36E-01 | -0.04 | 8.42E-01 |
| <b>ABHD5</b>         | 0.04  | 8.53E-01 | -0.04 | 8.43E-01 |
| <b>AC004812.1</b>    | -0.04 | 8.53E-01 | 0.04  | 8.43E-01 |
| <b>AC013468.1</b>    | -0.16 | 4.26E-01 | 0.04  | 8.43E-01 |
| <b>ADAMTS10</b>      | -0.27 | 1.66E-01 | 0.04  | 8.43E-01 |
| <b>ALOX5</b>         | -0.06 | 7.48E-01 | 0.04  | 8.43E-01 |
| <b>CHD8</b>          | -0.09 | 6.37E-01 | -0.04 | 8.43E-01 |
| <b>CLEC12A</b>       | -0.05 | 7.93E-01 | 0.04  | 8.43E-01 |
| <b>CLEC18B</b>       | -0.03 | 8.90E-01 | 0.04  | 8.43E-01 |
| <b>CSDE1</b>         | 0.09  | 6.41E-01 | 0.04  | 8.43E-01 |
| <b>DGKB</b>          | -0.51 | 5.56E-03 | 0.04  | 8.43E-01 |
| <b>FBXO36</b>        | 0.18  | 3.60E-01 | 0.04  | 8.43E-01 |
| <b>FMO4</b>          | 0.12  | 5.57E-01 | -0.04 | 8.43E-01 |
| <b>HES5</b>          | -0.20 | 3.02E-01 | -0.04 | 8.43E-01 |
| <b>HMGA1</b>         | 0.08  | 6.82E-01 | -0.04 | 8.43E-01 |
| <b>MT-CYB</b>        | 0.27  | 1.64E-01 | 0.04  | 8.43E-01 |
| <b>PCED1B-AS1</b>    | -0.02 | 9.12E-01 | 0.04  | 8.43E-01 |
| <b>PRED57</b>        | 0.07  | 7.33E-01 | -0.04 | 8.43E-01 |
| <b>RGPD4</b>         | 0.13  | 5.24E-01 | 0.04  | 8.43E-01 |
| <b>RNF133</b>        | -0.21 | 2.82E-01 | -0.04 | 8.43E-01 |
| <b>RP1-12G14.9</b>   | -0.26 | 1.90E-01 | -0.04 | 8.43E-01 |
| <b>RP11-102N12.2</b> | -0.05 | 8.05E-01 | 0.04  | 8.43E-01 |
| <b>RP11-117L5.4</b>  | -0.28 | 1.55E-01 | -0.04 | 8.43E-01 |
| <b>RP11-399E6.1</b>  | -0.28 | 1.43E-01 | -0.04 | 8.43E-01 |
| <b>RP11-597D13.7</b> | 0.35  | 7.05E-02 | -0.04 | 8.43E-01 |
| <b>RP11-881M11.4</b> | 0.05  | 7.96E-01 | -0.04 | 8.43E-01 |
| <b>RP11-999E24.3</b> | -0.12 | 5.50E-01 | -0.04 | 8.43E-01 |
| <b>S100A1</b>        | -0.07 | 7.07E-01 | -0.04 | 8.43E-01 |
| <b>SIRT2</b>         | 0.04  | 8.50E-01 | 0.04  | 8.43E-01 |
| <b>ST13P5</b>        | -0.17 | 3.97E-01 | 0.04  | 8.43E-01 |
| <b>UBE2J1</b>        | -0.03 | 8.67E-01 | -0.04 | 8.43E-01 |
| <b>VENTXP6</b>       | 0.00  | 9.87E-01 | -0.04 | 8.43E-01 |
| <b>bP-2189O9.2</b>   | -0.02 | 9.28E-01 | -0.04 | 8.43E-01 |
| <b>AL953854.2</b>    | -0.35 | 6.66E-02 | -0.04 | 8.44E-01 |
| <b>ARHGAP15</b>      | 0.18  | 3.68E-01 | 0.04  | 8.44E-01 |
| <b>C1orf229</b>      | -0.04 | 8.40E-01 | -0.04 | 8.44E-01 |
| <b>CBX8</b>          | -0.34 | 7.29E-02 | -0.04 | 8.44E-01 |
| <b>CDC42</b>         | 0.14  | 4.74E-01 | -0.04 | 8.44E-01 |
| <b>CFAP20</b>        | 0.17  | 3.74E-01 | -0.04 | 8.44E-01 |

|               |       |          |       |          |
|---------------|-------|----------|-------|----------|
| CLNK          | -0.16 | 4.24E-01 | 0.04  | 8.44E-01 |
| COX6B1P5      | 0.08  | 6.74E-01 | 0.04  | 8.44E-01 |
| EPN2-AS1      | -0.31 | 1.07E-01 | 0.04  | 8.44E-01 |
| G1876         | 0.04  | 8.35E-01 | -0.04 | 8.44E-01 |
| G31133        | -0.01 | 9.67E-01 | -0.04 | 8.44E-01 |
| GAB2          | -0.25 | 1.97E-01 | -0.04 | 8.44E-01 |
| GATAD2B       | -0.15 | 4.52E-01 | 0.04  | 8.44E-01 |
| HLA-G         | 0.11  | 5.71E-01 | 0.04  | 8.44E-01 |
| KIF12         | -0.20 | 3.09E-01 | -0.04 | 8.44E-01 |
| OR7E12P       | -0.18 | 3.59E-01 | 0.04  | 8.44E-01 |
| PLEKHA4       | -0.04 | 8.55E-01 | -0.04 | 8.44E-01 |
| PRPF38A       | -0.01 | 9.44E-01 | -0.04 | 8.44E-01 |
| PSMD1         | 0.07  | 7.17E-01 | -0.04 | 8.44E-01 |
| RNU2-5P       | -0.15 | 4.49E-01 | -0.04 | 8.44E-01 |
| RP11-159H22.2 | 0.10  | 6.12E-01 | -0.04 | 8.44E-01 |
| RP11-274B21.3 | 0.29  | 1.28E-01 | 0.04  | 8.44E-01 |
| RP11-486O13.4 | -0.19 | 3.26E-01 | -0.04 | 8.44E-01 |
| RP11-516A11.1 | 0.31  | 1.04E-01 | -0.04 | 8.44E-01 |
| RP11-548H18.2 | -0.04 | 8.44E-01 | -0.04 | 8.44E-01 |
| RP11-573N10.1 | -0.02 | 9.36E-01 | 0.04  | 8.44E-01 |
| RP4-769N13.7  | -0.15 | 4.47E-01 | 0.04  | 8.44E-01 |
| RP9           | 0.07  | 7.37E-01 | 0.04  | 8.44E-01 |
| RPL10P3       | 0.31  | 1.04E-01 | -0.04 | 8.44E-01 |
| RPL23AP64     | -0.20 | 3.05E-01 | -0.04 | 8.44E-01 |
| SLC9A5        | -0.09 | 6.58E-01 | 0.04  | 8.44E-01 |
| THNSL2        | 0.08  | 6.91E-01 | 0.04  | 8.44E-01 |
| TMEM203       | 0.09  | 6.47E-01 | 0.04  | 8.44E-01 |
| WNT2B         | 0.00  | 9.89E-01 | 0.04  | 8.44E-01 |
| XLOC_007556   | -0.52 | 4.18E-03 | 0.04  | 8.44E-01 |
| AC133785.1    | 0.19  | 3.37E-01 | 0.04  | 8.45E-01 |
| C10orf2       | 0.19  | 3.29E-01 | 0.04  | 8.45E-01 |
| CTD-2525I3.3  | -0.25 | 2.03E-01 | 0.04  | 8.45E-01 |
| FBXL19        | 0.40  | 3.53E-02 | 0.04  | 8.45E-01 |
| GATM          | 0.11  | 5.93E-01 | 0.04  | 8.45E-01 |
| GTF3C5        | 0.17  | 3.94E-01 | 0.04  | 8.45E-01 |
| PHBP2         | -0.11 | 5.86E-01 | 0.04  | 8.45E-01 |
| RN7SKP285     | -0.34 | 7.97E-02 | 0.04  | 8.45E-01 |
| RP11-127I20.7 | 0.14  | 4.77E-01 | 0.04  | 8.45E-01 |
| RP11-231P20.2 | 0.34  | 7.87E-02 | 0.04  | 8.45E-01 |
| RP11-24C3.2   | -0.23 | 2.37E-01 | 0.04  | 8.45E-01 |
| RP11-351I21.7 | 0.21  | 2.93E-01 | 0.04  | 8.45E-01 |
| RP11-964E11.3 | 0.08  | 6.81E-01 | 0.04  | 8.45E-01 |
| RPL29         | 0.09  | 6.66E-01 | 0.04  | 8.45E-01 |
| SLC25A5       | 0.17  | 4.01E-01 | 0.04  | 8.45E-01 |
| TSC22D2       | 0.02  | 9.08E-01 | 0.04  | 8.45E-01 |
| C1RL-AS1      | 0.13  | 4.96E-01 | -0.04 | 8.45E-01 |
| CHORDC1       | -0.06 | 7.59E-01 | -0.04 | 8.45E-01 |

|                         |       |          |       |          |
|-------------------------|-------|----------|-------|----------|
| <b>FUK</b>              | -0.28 | 1.49E-01 | -0.04 | 8.45E-01 |
| <b>GUSBP2</b>           | 0.10  | 6.14E-01 | -0.04 | 8.45E-01 |
| <b>HNRNPA3P9</b>        | -0.26 | 1.76E-01 | -0.04 | 8.45E-01 |
| <b>ID2-AS1</b>          | 0.00  | 9.97E-01 | -0.04 | 8.45E-01 |
| <b>MIR222HG</b>         | 0.14  | 4.67E-01 | -0.04 | 8.45E-01 |
| <b>OMG</b>              | 0.08  | 6.91E-01 | -0.04 | 8.45E-01 |
| <b>PKD1L3</b>           | -0.35 | 6.91E-02 | -0.04 | 8.45E-01 |
| <b>PTMS</b>             | 0.21  | 2.77E-01 | -0.04 | 8.45E-01 |
| <b>REXO1</b>            | -0.05 | 7.95E-01 | -0.04 | 8.45E-01 |
| <b>RP11-1023L17.1</b>   | -0.03 | 8.66E-01 | -0.04 | 8.45E-01 |
| <b>RP11-676J12.7</b>    | -0.21 | 2.77E-01 | -0.04 | 8.45E-01 |
| <b>RP11-770J1.5</b>     | -0.20 | 3.13E-01 | -0.04 | 8.45E-01 |
| <b>RP4-798P15.3</b>     | -0.08 | 6.91E-01 | -0.04 | 8.45E-01 |
| <b>RPS9</b>             | 0.13  | 5.01E-01 | -0.04 | 8.45E-01 |
| <b>Kbac-BPG299F13.1</b> | -0.15 | 4.49E-01 | -0.04 | 8.45E-01 |
| <b>ZNF23</b>            | 0.04  | 8.44E-01 | -0.04 | 8.45E-01 |
| <b>AC005042.4</b>       | 0.01  | 9.60E-01 | 0.04  | 8.46E-01 |
| <b>ARL5B</b>            | 0.11  | 5.66E-01 | 0.04  | 8.46E-01 |
| <b>ASF1A</b>            | -0.11 | 5.92E-01 | 0.04  | 8.46E-01 |
| <b>C15orf48</b>         | 0.30  | 1.24E-01 | 0.04  | 8.46E-01 |
| <b>HIST1H4J</b>         | 0.13  | 5.23E-01 | 0.04  | 8.46E-01 |
| <b>HSPH1</b>            | 0.07  | 7.13E-01 | 0.04  | 8.46E-01 |
| <b>JOSD1</b>            | 0.12  | 5.28E-01 | 0.04  | 8.46E-01 |
| <b>MED28P3</b>          | -0.30 | 1.23E-01 | 0.04  | 8.46E-01 |
| <b>MZT2B</b>            | 0.27  | 1.63E-01 | 0.04  | 8.46E-01 |
| <b>RP11-110I1.12</b>    | 0.27  | 1.70E-01 | 0.04  | 8.46E-01 |
| <b>RP11-24F11.2</b>     | -0.03 | 8.82E-01 | 0.04  | 8.46E-01 |
| <b>RP11-317B17.4</b>    | -0.24 | 2.23E-01 | 0.04  | 8.46E-01 |
| <b>RP11-69L16.4</b>     | -0.10 | 6.29E-01 | 0.04  | 8.46E-01 |
| <b>RP5-882C2.2</b>      | -0.05 | 8.19E-01 | 0.04  | 8.46E-01 |
| <b>RPL17P19</b>         | -0.03 | 8.93E-01 | 0.04  | 8.46E-01 |
| <b>SNORA33</b>          | 0.03  | 8.93E-01 | 0.04  | 8.46E-01 |
| <b>TRMT61B</b>          | 0.17  | 3.82E-01 | 0.04  | 8.46E-01 |
| <b>TWF1</b>             | 0.11  | 5.82E-01 | 0.04  | 8.46E-01 |
| <b>ZNF620</b>           | 0.37  | 5.56E-02 | 0.04  | 8.46E-01 |
| <b>ACOT8</b>            | -0.15 | 4.60E-01 | -0.04 | 8.46E-01 |
| <b>ADK</b>              | 0.03  | 8.98E-01 | -0.04 | 8.46E-01 |
| <b>AF131215.8</b>       | 0.11  | 5.68E-01 | -0.04 | 8.46E-01 |
| <b>ANO2</b>             | -0.46 | 1.37E-02 | -0.04 | 8.46E-01 |
| <b>C1QTNF2</b>          | -0.02 | 9.10E-01 | -0.04 | 8.46E-01 |
| <b>CRAMP1</b>           | 0.07  | 7.25E-01 | -0.04 | 8.46E-01 |
| <b>CTD-2193G5.1</b>     | -0.30 | 1.19E-01 | -0.04 | 8.46E-01 |
| <b>CTD-2538C1.2</b>     | -0.05 | 8.11E-01 | -0.04 | 8.46E-01 |
| <b>CTSH</b>             | 0.09  | 6.45E-01 | -0.04 | 8.46E-01 |
| <b>EIF3F</b>            | -0.06 | 7.71E-01 | -0.04 | 8.46E-01 |
| <b>GMFB</b>             | 0.17  | 3.95E-01 | -0.04 | 8.46E-01 |
| <b>IGLV1-47</b>         | 0.26  | 1.76E-01 | -0.04 | 8.46E-01 |

|                |       |          |       |          |
|----------------|-------|----------|-------|----------|
| KCNMB2         | 0.05  | 7.93E-01 | -0.04 | 8.46E-01 |
| LVRN           | -0.19 | 3.39E-01 | -0.04 | 8.46E-01 |
| MAGEF1         | 0.19  | 3.41E-01 | -0.04 | 8.46E-01 |
| MRPS2          | 0.13  | 5.14E-01 | -0.04 | 8.46E-01 |
| NKD1           | -0.34 | 8.08E-02 | -0.04 | 8.46E-01 |
| RNU6-444P      | -0.35 | 6.41E-02 | -0.04 | 8.46E-01 |
| RP11-209M4.1   | 0.09  | 6.40E-01 | -0.04 | 8.46E-01 |
| RP11-227G15.12 | -0.05 | 7.97E-01 | -0.04 | 8.46E-01 |
| RP11-380F14.2  | -0.06 | 7.54E-01 | -0.04 | 8.46E-01 |
| RP11-44N12.5   | -0.08 | 6.78E-01 | -0.04 | 8.46E-01 |
| RP13-942N8.1   | 0.02  | 9.09E-01 | -0.04 | 8.46E-01 |
| RP5-1187M17.10 | -0.04 | 8.42E-01 | -0.04 | 8.46E-01 |
| SMAD1-AS1      | 0.30  | 1.15E-01 | -0.04 | 8.46E-01 |
| TMEM33         | 0.27  | 1.59E-01 | -0.04 | 8.46E-01 |
| AGAP10P        | 0.21  | 2.87E-01 | -0.04 | 8.48E-01 |
| ARHGEF38       | 0.16  | 4.29E-01 | -0.04 | 8.48E-01 |
| ASNSD1         | 0.17  | 3.87E-01 | 0.04  | 8.48E-01 |
| BX649597.1     | -0.06 | 7.79E-01 | -0.04 | 8.48E-01 |
| C11orf49       | 0.12  | 5.29E-01 | -0.04 | 8.48E-01 |
| CHAD           | -0.05 | 7.88E-01 | -0.04 | 8.48E-01 |
| CMB9-22P13.1   | 0.10  | 6.30E-01 | -0.04 | 8.48E-01 |
| CNOT4          | -0.19 | 3.25E-01 | 0.04  | 8.48E-01 |
| CPEB4          | 0.28  | 1.54E-01 | 0.04  | 8.48E-01 |
| CTA-313A17.2   | 0.26  | 1.86E-01 | 0.04  | 8.48E-01 |
| DPH1           | -0.20 | 3.16E-01 | -0.04 | 8.48E-01 |
| FDPS           | 0.20  | 3.00E-01 | 0.04  | 8.48E-01 |
| GAS5-AS1       | -0.04 | 8.25E-01 | -0.04 | 8.48E-01 |
| HMSD           | -0.11 | 5.87E-01 | 0.04  | 8.48E-01 |
| HNRNPA1P10     | -0.06 | 7.60E-01 | 0.04  | 8.48E-01 |
| HSPE1          | 0.05  | 7.84E-01 | 0.04  | 8.48E-01 |
| HTT-AS         | -0.08 | 6.79E-01 | 0.04  | 8.48E-01 |
| KANK3          | -0.05 | 7.88E-01 | 0.04  | 8.48E-01 |
| LINC01317      | -0.51 | 5.71E-03 | -0.04 | 8.48E-01 |
| MED13          | 0.17  | 3.78E-01 | 0.04  | 8.48E-01 |
| NOS1AP         | -0.27 | 1.70E-01 | -0.04 | 8.48E-01 |
| ODF2-AS1       | 0.01  | 9.76E-01 | -0.04 | 8.48E-01 |
| RP11-128M1.1   | 0.08  | 6.79E-01 | 0.04  | 8.48E-01 |
| RP11-160H22.3  | 0.37  | 5.25E-02 | 0.04  | 8.48E-01 |
| RP11-20I23.10  | 0.19  | 3.22E-01 | 0.04  | 8.48E-01 |
| RP11-598F7.4   | 0.04  | 8.51E-01 | 0.04  | 8.48E-01 |
| RP3-441A12.1   | 0.01  | 9.70E-01 | 0.04  | 8.48E-01 |
| RP5-855D21.1   | 0.00  | 9.85E-01 | -0.04 | 8.48E-01 |
| SLC35B1        | -0.02 | 9.39E-01 | -0.04 | 8.48E-01 |
| SMIM5          | -0.01 | 9.56E-01 | 0.04  | 8.48E-01 |
| SNHG16         | 0.14  | 4.66E-01 | 0.04  | 8.48E-01 |
| SPP1           | 0.12  | 5.51E-01 | -0.04 | 8.48E-01 |
| ZNF18          | -0.16 | 4.28E-01 | -0.04 | 8.48E-01 |

|               |       |          |       |          |
|---------------|-------|----------|-------|----------|
| AC018890.6    | 0.00  | 9.81E-01 | 0.04  | 8.49E-01 |
| AP000462.3    | 0.18  | 3.56E-01 | 0.04  | 8.49E-01 |
| ARHGEF10L     | 0.08  | 7.01E-01 | 0.04  | 8.49E-01 |
| ASAP1-IT2     | 0.01  | 9.47E-01 | 0.04  | 8.49E-01 |
| CDPF1         | -0.02 | 9.28E-01 | 0.04  | 8.49E-01 |
| CYP11A1       | 0.16  | 4.12E-01 | 0.04  | 8.49E-01 |
| DENND5A       | -0.12 | 5.46E-01 | 0.04  | 8.49E-01 |
| DOCK4         | -0.15 | 4.34E-01 | 0.04  | 8.49E-01 |
| FAM66E        | -0.15 | 4.36E-01 | 0.04  | 8.49E-01 |
| GOT1          | 0.20  | 3.04E-01 | 0.04  | 8.49E-01 |
| IL6ST         | 0.18  | 3.69E-01 | 0.04  | 8.49E-01 |
| LRP12         | -0.02 | 9.08E-01 | 0.04  | 8.49E-01 |
| RP11-172E10.1 | -0.16 | 4.15E-01 | 0.04  | 8.49E-01 |
| RP11-90O23.1  | -0.07 | 7.40E-01 | 0.04  | 8.49E-01 |
| RPL31P52      | 0.13  | 5.21E-01 | 0.04  | 8.49E-01 |
| SLC25A43      | 0.08  | 6.85E-01 | 0.04  | 8.49E-01 |
| SPG21         | 0.07  | 7.26E-01 | 0.04  | 8.49E-01 |
| TBC1D10C      | 0.06  | 7.66E-01 | 0.04  | 8.49E-01 |
| TPTE2P1       | -0.39 | 3.88E-02 | 0.04  | 8.49E-01 |
| TTC28         | -0.16 | 4.05E-01 | 0.04  | 8.49E-01 |
| YWHAH         | 0.06  | 7.43E-01 | 0.04  | 8.49E-01 |
| AR            | -0.21 | 2.82E-01 | -0.04 | 8.49E-01 |
| CNKSR3        | 0.26  | 1.78E-01 | -0.04 | 8.49E-01 |
| CREBL2        | -0.04 | 8.52E-01 | -0.04 | 8.49E-01 |
| HBA1          | 0.02  | 9.04E-01 | -0.04 | 8.49E-01 |
| LDHAP7        | -0.01 | 9.76E-01 | -0.04 | 8.49E-01 |
| MYBBP1A       | 0.22  | 2.53E-01 | -0.04 | 8.49E-01 |
| RN7SKP16      | -0.09 | 6.44E-01 | -0.04 | 8.49E-01 |
| SETP12        | 0.05  | 7.88E-01 | -0.04 | 8.49E-01 |
| SNX21         | -0.21 | 2.89E-01 | -0.04 | 8.49E-01 |
| ST13P20       | 0.00  | 9.99E-01 | -0.04 | 8.49E-01 |
| STOML2        | 0.14  | 4.84E-01 | -0.04 | 8.49E-01 |
| TRNP1         | 0.15  | 4.52E-01 | -0.04 | 8.49E-01 |
| WNK1          | -0.14 | 4.80E-01 | -0.04 | 8.49E-01 |
| ZNF71         | 0.00  | 9.80E-01 | -0.04 | 8.49E-01 |
| AP000560.1    | -0.07 | 7.11E-01 | 0.04  | 8.50E-01 |
| ATP2B4        | -0.24 | 2.22E-01 | 0.04  | 8.50E-01 |
| CD101         | -0.14 | 4.75E-01 | 0.04  | 8.50E-01 |
| GSN-AS1       | -0.21 | 2.88E-01 | 0.04  | 8.50E-01 |
| GTF2E2        | -0.02 | 9.05E-01 | 0.04  | 8.50E-01 |
| HYAL3         | 0.16  | 4.12E-01 | 0.04  | 8.50E-01 |
| PEX10         | 0.08  | 6.91E-01 | 0.04  | 8.50E-01 |
| RP11-416A17.1 | -0.19 | 3.34E-01 | 0.04  | 8.50E-01 |
| RPL27         | 0.23  | 2.31E-01 | 0.04  | 8.50E-01 |
| SNORA30       | -0.20 | 3.17E-01 | 0.04  | 8.50E-01 |
| AL627309.1    | -0.04 | 8.53E-01 | -0.04 | 8.50E-01 |
| ANKRD30B      | -0.11 | 5.69E-01 | -0.04 | 8.50E-01 |



|               |       |          |       |          |
|---------------|-------|----------|-------|----------|
| CAPZA3        | -0.03 | 8.93E-01 | -0.04 | 8.50E-01 |
| CCDC43        | 0.02  | 9.13E-01 | -0.04 | 8.50E-01 |
| CTD-2024P10.1 | 0.13  | 5.26E-01 | -0.04 | 8.50E-01 |
| ELANE         | 0.00  | 9.82E-01 | -0.04 | 8.50E-01 |
| FBXW12        | -0.03 | 8.78E-01 | -0.04 | 8.50E-01 |
| ITGA6         | -0.09 | 6.63E-01 | -0.04 | 8.50E-01 |
| ITGA7         | 0.07  | 7.07E-01 | -0.04 | 8.50E-01 |
| MTND4P14      | -0.04 | 8.31E-01 | -0.04 | 8.50E-01 |
| PCMT1         | 0.03  | 8.81E-01 | -0.04 | 8.50E-01 |
| PIANP         | 0.16  | 4.29E-01 | -0.04 | 8.50E-01 |
| PTCH2         | -0.44 | 1.85E-02 | -0.04 | 8.50E-01 |
| RN7SL246P     | 0.00  | 9.97E-01 | -0.04 | 8.50E-01 |
| ROPN1         | -0.50 | 6.31E-03 | -0.04 | 8.50E-01 |
| RP11-341N2.1  | -0.06 | 7.71E-01 | -0.04 | 8.50E-01 |
| SMARCA2       | -0.25 | 1.93E-01 | -0.04 | 8.50E-01 |
| SUMF1         | 0.16  | 4.14E-01 | -0.04 | 8.50E-01 |
| TCEB3-AS1     | 0.14  | 4.72E-01 | -0.04 | 8.50E-01 |
| TMX1          | 0.24  | 2.27E-01 | -0.04 | 8.50E-01 |
| WI2-3658N16.1 | -0.17 | 3.84E-01 | -0.04 | 8.50E-01 |
| ABHD1         | -0.06 | 7.57E-01 | -0.04 | 8.51E-01 |
| AC003104.1    | -0.27 | 1.59E-01 | 0.04  | 8.51E-01 |
| AC007050.17   | -0.05 | 8.14E-01 | 0.04  | 8.51E-01 |
| APOM          | -0.08 | 6.82E-01 | -0.04 | 8.51E-01 |
| ARL9          | -0.42 | 2.65E-02 | -0.04 | 8.51E-01 |
| ATP6V0B       | 0.12  | 5.43E-01 | -0.04 | 8.51E-01 |
| B3GALNT2      | -0.13 | 4.96E-01 | -0.04 | 8.51E-01 |
| CHST9         | 0.08  | 6.93E-01 | 0.04  | 8.51E-01 |
| G20113        | -0.23 | 2.38E-01 | 0.04  | 8.51E-01 |
| G26311        | 0.02  | 9.06E-01 | -0.04 | 8.51E-01 |
| G36779        | 0.02  | 9.18E-01 | 0.04  | 8.51E-01 |
| GNG12         | -0.06 | 7.80E-01 | -0.04 | 8.51E-01 |
| GRIP1         | -0.25 | 2.08E-01 | -0.04 | 8.51E-01 |
| MIR4714       | 0.21  | 2.89E-01 | 0.04  | 8.51E-01 |
| MYCL          | -0.07 | 7.29E-01 | -0.04 | 8.51E-01 |
| NCOA3         | 0.11  | 5.93E-01 | 0.04  | 8.51E-01 |
| NVL           | -0.04 | 8.52E-01 | 0.04  | 8.51E-01 |
| PCDHB18P      | -0.16 | 4.05E-01 | -0.04 | 8.51E-01 |
| PTGFRN        | 0.13  | 5.04E-01 | 0.04  | 8.51E-01 |
| RFC4          | -0.02 | 9.03E-01 | -0.04 | 8.51E-01 |
| RN7SKP95      | -0.26 | 1.90E-01 | -0.04 | 8.51E-01 |
| RN7SL351P     | 0.10  | 6.16E-01 | 0.04  | 8.51E-01 |
| RNU6-482P     | -0.23 | 2.37E-01 | -0.04 | 8.51E-01 |
| RP1-309F20.4  | -0.23 | 2.32E-01 | 0.04  | 8.51E-01 |
| RP11-142C4.4  | 0.05  | 7.96E-01 | -0.04 | 8.51E-01 |
| RP11-318C24.2 | 0.20  | 3.13E-01 | -0.04 | 8.51E-01 |
| RP11-437F6.1  | -0.38 | 4.46E-02 | 0.04  | 8.51E-01 |
| RP11-780M14.1 | -0.11 | 5.61E-01 | -0.04 | 8.51E-01 |

|               |       |          |       |          |
|---------------|-------|----------|-------|----------|
| SLC13A2       | -0.16 | 4.02E-01 | 0.04  | 8.51E-01 |
| SSR2          | 0.00  | 9.99E-01 | -0.04 | 8.51E-01 |
| TPM1          | -0.04 | 8.55E-01 | 0.04  | 8.51E-01 |
| TSNARE1       | -0.32 | 9.96E-02 | 0.04  | 8.51E-01 |
| VANGL1        | 0.31  | 1.14E-01 | -0.04 | 8.51E-01 |
| WWC3-AS1      | -0.44 | 2.06E-02 | 0.04  | 8.51E-01 |
| XLOC_012736   | -0.08 | 6.72E-01 | 0.04  | 8.51E-01 |
| ZNF407        | -0.22 | 2.57E-01 | -0.04 | 8.51E-01 |
| ZNF766        | -0.18 | 3.57E-01 | -0.04 | 8.51E-01 |
| COL17A1       | -0.03 | 8.82E-01 | 0.04  | 8.52E-01 |
| FEM1C         | 0.08  | 7.03E-01 | 0.04  | 8.52E-01 |
| FLRT3         | 0.42  | 2.50E-02 | 0.04  | 8.52E-01 |
| G28011        | -0.12 | 5.52E-01 | 0.04  | 8.52E-01 |
| LY6D          | 0.06  | 7.60E-01 | 0.04  | 8.52E-01 |
| MRPL35        | 0.21  | 2.91E-01 | 0.04  | 8.52E-01 |
| OLFM2         | -0.13 | 5.10E-01 | 0.04  | 8.52E-01 |
| RP11-188P17.2 | -0.10 | 6.00E-01 | 0.04  | 8.52E-01 |
| RP11-553L6.5  | -0.31 | 1.06E-01 | 0.04  | 8.52E-01 |
| RP5-1158E12.3 | 0.29  | 1.31E-01 | 0.04  | 8.52E-01 |
| SLC23A2       | 0.27  | 1.65E-01 | 0.04  | 8.52E-01 |
| TRAV8-3       | 0.15  | 4.37E-01 | 0.04  | 8.52E-01 |
| XLOC_010312   | -0.08 | 6.91E-01 | 0.04  | 8.52E-01 |
| ZNHIT2        | 0.12  | 5.38E-01 | 0.04  | 8.52E-01 |
| ARHGEF40      | -0.43 | 2.15E-02 | -0.04 | 8.52E-01 |
| ECHDC2        | -0.03 | 8.77E-01 | -0.04 | 8.52E-01 |
| FAM129C       | -0.15 | 4.31E-01 | -0.04 | 8.52E-01 |
| FRY-AS1       | -0.04 | 8.25E-01 | -0.04 | 8.52E-01 |
| G35131        | -0.13 | 5.22E-01 | -0.04 | 8.52E-01 |
| G42780        | -0.16 | 4.25E-01 | -0.04 | 8.52E-01 |
| HSP90B2P      | 0.04  | 8.58E-01 | -0.04 | 8.52E-01 |
| LAMC3         | -0.13 | 5.10E-01 | -0.04 | 8.52E-01 |
| LANCL3        | 0.29  | 1.29E-01 | -0.04 | 8.52E-01 |
| NUP210L       | 0.23  | 2.45E-01 | -0.04 | 8.52E-01 |
| PSMC2         | 0.00  | 9.80E-01 | -0.04 | 8.52E-01 |
| RP1-267D11.1  | 0.17  | 4.00E-01 | -0.04 | 8.52E-01 |
| RP11-30L15.4  | -0.20 | 3.17E-01 | -0.04 | 8.52E-01 |
| RP11-554A11.8 | -0.16 | 4.25E-01 | -0.04 | 8.52E-01 |
| RP11-739L10.1 | 0.09  | 6.57E-01 | -0.04 | 8.52E-01 |
| RP4-784A16.4  | -0.04 | 8.54E-01 | -0.04 | 8.52E-01 |
| NORD53_SNORD9 | -0.15 | 4.34E-01 | -0.04 | 8.52E-01 |
| TAS2R46       | 0.24  | 2.12E-01 | -0.04 | 8.52E-01 |
| TMEM35        | -0.01 | 9.56E-01 | -0.04 | 8.52E-01 |
| AP5Z1         | -0.05 | 8.17E-01 | -0.04 | 8.54E-01 |
| ATP5G1P6      | -0.11 | 5.92E-01 | -0.04 | 8.54E-01 |
| BUB3          | 0.09  | 6.48E-01 | -0.04 | 8.54E-01 |
| CA12          | 0.20  | 3.18E-01 | -0.04 | 8.54E-01 |
| CANX          | 0.16  | 4.03E-01 | -0.04 | 8.54E-01 |

|                       |       |          |       |          |
|-----------------------|-------|----------|-------|----------|
| <b>G3BP2</b>          | -0.06 | 7.50E-01 | -0.04 | 8.54E-01 |
| <b>GLTSCR1</b>        | -0.03 | 8.85E-01 | -0.04 | 8.54E-01 |
| <b>KLC1</b>           | 0.11  | 5.89E-01 | -0.04 | 8.54E-01 |
| <b>LINC00681</b>      | 0.11  | 5.90E-01 | -0.04 | 8.54E-01 |
| <b>MIATNB</b>         | 0.03  | 8.91E-01 | -0.04 | 8.54E-01 |
| <b>PTGR2</b>          | -0.13 | 4.99E-01 | -0.04 | 8.54E-01 |
| <b>RAB9A</b>          | -0.06 | 7.69E-01 | -0.04 | 8.54E-01 |
| <b>RP11-185E8.2</b>   | -0.10 | 6.06E-01 | -0.04 | 8.54E-01 |
| <b>RP11-392P7.6</b>   | -0.12 | 5.57E-01 | -0.04 | 8.54E-01 |
| <b>RP11-755F10.3</b>  | -0.17 | 3.99E-01 | -0.04 | 8.54E-01 |
| <b>SNHG1</b>          | -0.05 | 7.87E-01 | -0.04 | 8.54E-01 |
| <b>THG1L</b>          | -0.13 | 4.97E-01 | -0.04 | 8.54E-01 |
| <b>AC002553.4</b>     | -0.08 | 6.70E-01 | 0.04  | 8.54E-01 |
| <b>AF064858.11</b>    | -0.09 | 6.65E-01 | 0.04  | 8.54E-01 |
| <b>BOD1</b>           | 0.02  | 9.26E-01 | 0.04  | 8.54E-01 |
| <b>CCDC85A</b>        | -0.14 | 4.93E-01 | 0.04  | 8.54E-01 |
| <b>CEP68</b>          | -0.15 | 4.37E-01 | 0.04  | 8.54E-01 |
| <b>CTB-5212.4</b>     | -0.29 | 1.33E-01 | 0.04  | 8.54E-01 |
| <b>FTH1P4</b>         | -0.28 | 1.56E-01 | 0.04  | 8.54E-01 |
| <b>G32140</b>         | -0.05 | 7.85E-01 | 0.04  | 8.54E-01 |
| <b>PDCL3P6</b>        | -0.01 | 9.42E-01 | 0.04  | 8.54E-01 |
| <b>PIDD1</b>          | -0.14 | 4.86E-01 | 0.04  | 8.54E-01 |
| <b>PPM1N</b>          | -0.01 | 9.49E-01 | 0.04  | 8.54E-01 |
| <b>RN7SL153P</b>      | -0.04 | 8.28E-01 | 0.04  | 8.54E-01 |
| <b>RP11-1094M14.7</b> | 0.22  | 2.61E-01 | 0.04  | 8.54E-01 |
| <b>RP11-249C24.10</b> | 0.13  | 4.99E-01 | 0.04  | 8.54E-01 |
| <b>RP11-596D21.1</b>  | -0.27 | 1.63E-01 | 0.04  | 8.54E-01 |
| <b>SLC25A19</b>       | 0.17  | 3.81E-01 | 0.04  | 8.54E-01 |
| <b>SYNC</b>           | 0.09  | 6.65E-01 | 0.04  | 8.54E-01 |
| <b>TOMM5</b>          | -0.06 | 7.71E-01 | 0.04  | 8.54E-01 |
| <b>VN1R84P</b>        | 0.05  | 8.16E-01 | 0.04  | 8.54E-01 |
| <b>ZBTB32</b>         | 0.19  | 3.27E-01 | 0.04  | 8.54E-01 |
| <b>AC004453.8</b>     | 0.27  | 1.67E-01 | 0.04  | 8.55E-01 |
| <b>AC004893.11</b>    | 0.30  | 1.20E-01 | -0.04 | 8.55E-01 |
| <b>AC007318.5</b>     | 0.08  | 6.90E-01 | -0.04 | 8.55E-01 |
| <b>AC087501.1</b>     | -0.21 | 2.75E-01 | 0.04  | 8.55E-01 |
| <b>AC144831.3</b>     | -0.36 | 5.80E-02 | -0.04 | 8.55E-01 |
| <b>AMPH</b>           | -0.32 | 9.42E-02 | -0.04 | 8.55E-01 |
| <b>AP000936.1</b>     | 0.01  | 9.46E-01 | 0.04  | 8.55E-01 |
| <b>CCDC63</b>         | -0.14 | 4.89E-01 | -0.04 | 8.55E-01 |
| <b>CDC42EP2</b>       | 0.33  | 8.40E-02 | -0.04 | 8.55E-01 |
| <b>CTA-445C9.14</b>   | -0.05 | 7.94E-01 | -0.04 | 8.55E-01 |
| <b>CTB-89H12.4</b>    | -0.08 | 6.91E-01 | 0.04  | 8.55E-01 |
| <b>CTC-459M5.2</b>    | 0.12  | 5.48E-01 | 0.04  | 8.55E-01 |
| <b>DNAJC12</b>        | -0.20 | 3.12E-01 | 0.04  | 8.55E-01 |
| <b>FNIP2</b>          | -0.19 | 3.21E-01 | -0.04 | 8.55E-01 |
| <b>GALNT13</b>        | -0.14 | 4.70E-01 | 0.04  | 8.55E-01 |

|               |       |          |       |          |
|---------------|-------|----------|-------|----------|
| ITGA10        | -0.05 | 8.14E-01 | -0.04 | 8.55E-01 |
| LINC00582     | 0.12  | 5.30E-01 | 0.04  | 8.55E-01 |
| MT1F          | 0.06  | 7.62E-01 | -0.04 | 8.55E-01 |
| NDUFB11       | 0.13  | 4.99E-01 | 0.04  | 8.55E-01 |
| NREP          | 0.04  | 8.35E-01 | -0.04 | 8.55E-01 |
| NRSN2-AS1     | 0.59  | 8.70E-04 | -0.04 | 8.55E-01 |
| PLCL2         | -0.12 | 5.28E-01 | -0.04 | 8.55E-01 |
| PRC1          | 0.10  | 6.28E-01 | 0.04  | 8.55E-01 |
| PTOV1-AS2     | -0.31 | 1.12E-01 | -0.04 | 8.55E-01 |
| RHD           | -0.28 | 1.54E-01 | 0.04  | 8.55E-01 |
| RMDN1         | 0.12  | 5.29E-01 | -0.04 | 8.55E-01 |
| RNU5F-3P      | -0.10 | 6.19E-01 | 0.04  | 8.55E-01 |
| RP11-10L12.2  | 0.05  | 7.99E-01 | 0.04  | 8.55E-01 |
| RP11-156K23.3 | -0.09 | 6.45E-01 | 0.04  | 8.55E-01 |
| RP11-316N24.2 | 0.13  | 5.23E-01 | -0.04 | 8.55E-01 |
| RP11-346C16.2 | 0.07  | 7.41E-01 | 0.04  | 8.55E-01 |
| RP11-433J8.1  | -0.11 | 5.86E-01 | 0.04  | 8.55E-01 |
| RP11-646E18.2 | -0.08 | 6.73E-01 | -0.04 | 8.55E-01 |
| RRM1          | 0.08  | 6.95E-01 | 0.04  | 8.55E-01 |
| STMN3         | 0.22  | 2.68E-01 | 0.04  | 8.55E-01 |
| TSPAN9-IT1    | -0.14 | 4.64E-01 | -0.04 | 8.55E-01 |
| UGDH-AS1      | -0.05 | 7.97E-01 | 0.04  | 8.55E-01 |
| XLOC_005302   | -0.23 | 2.47E-01 | 0.04  | 8.55E-01 |
| ZNF221        | 0.02  | 9.27E-01 | -0.04 | 8.55E-01 |
| ANGPT2        | 0.25  | 1.93E-01 | 0.04  | 8.56E-01 |
| BGN           | -0.26 | 1.88E-01 | 0.04  | 8.56E-01 |
| CTC-236F12.4  | 0.22  | 2.57E-01 | 0.04  | 8.56E-01 |
| CYBRD1        | -0.30 | 1.23E-01 | 0.04  | 8.56E-01 |
| G12085        | 0.52  | 4.83E-03 | 0.04  | 8.56E-01 |
| G30725        | -0.24 | 2.15E-01 | 0.04  | 8.56E-01 |
| HSD17B10      | 0.06  | 7.53E-01 | 0.04  | 8.56E-01 |
| IK            | -0.09 | 6.39E-01 | 0.04  | 8.56E-01 |
| KIAA1462      | 0.03  | 8.70E-01 | 0.04  | 8.56E-01 |
| LINC01320     | -0.12 | 5.36E-01 | 0.04  | 8.56E-01 |
| MIA3          | -0.20 | 3.15E-01 | 0.04  | 8.56E-01 |
| NENF          | 0.02  | 9.23E-01 | 0.04  | 8.56E-01 |
| PUS3          | 0.04  | 8.21E-01 | 0.04  | 8.56E-01 |
| RP11-419I17.1 | 0.05  | 8.10E-01 | 0.04  | 8.56E-01 |
| RP11-425D17.2 | -0.16 | 4.08E-01 | 0.04  | 8.56E-01 |
| RP11-507K2.6  | -0.05 | 7.97E-01 | 0.04  | 8.56E-01 |
| RPL34P18      | -0.16 | 4.25E-01 | 0.04  | 8.56E-01 |
| SCAPER        | 0.21  | 2.91E-01 | 0.04  | 8.56E-01 |
| DNASE1L3      | -0.08 | 7.01E-01 | -0.04 | 8.56E-01 |
| G30340        | 0.29  | 1.28E-01 | -0.04 | 8.56E-01 |
| MTMR3         | -0.18 | 3.50E-01 | -0.04 | 8.56E-01 |
| P4HA2-AS1     | 0.10  | 6.17E-01 | -0.04 | 8.56E-01 |
| PABPC5        | -0.02 | 9.24E-01 | -0.04 | 8.56E-01 |

|               |       |          |       |          |
|---------------|-------|----------|-------|----------|
| PDCL3         | -0.03 | 8.79E-01 | -0.04 | 8.56E-01 |
| PVR           | 0.10  | 6.31E-01 | -0.04 | 8.56E-01 |
| RP11-459D22.1 | -0.31 | 1.13E-01 | -0.04 | 8.56E-01 |
| RP11-575L7.8  | -0.03 | 8.95E-01 | -0.04 | 8.56E-01 |
| RP11-720D4.2  | -0.12 | 5.56E-01 | -0.04 | 8.56E-01 |
| RP11-79L9.2   | -0.29 | 1.42E-01 | -0.04 | 8.56E-01 |
| SPCS2         | -0.04 | 8.51E-01 | -0.04 | 8.56E-01 |
| STYXL1        | 0.04  | 8.42E-01 | -0.04 | 8.56E-01 |
| ABL1          | 0.25  | 1.92E-01 | 0.04  | 8.57E-01 |
| AC004854.5    | -0.12 | 5.45E-01 | -0.04 | 8.57E-01 |
| AC010492.2    | 0.03  | 8.66E-01 | 0.04  | 8.57E-01 |
| BBX           | -0.17 | 3.98E-01 | -0.04 | 8.57E-01 |
| CCDC60        | -0.06 | 7.50E-01 | -0.04 | 8.57E-01 |
| CD81          | -0.01 | 9.48E-01 | 0.04  | 8.57E-01 |
| CTC-559E9.5   | -0.24 | 2.20E-01 | -0.04 | 8.57E-01 |
| DDX51         | 0.02  | 9.04E-01 | 0.04  | 8.57E-01 |
| EIF2B3        | 0.22  | 2.71E-01 | 0.04  | 8.57E-01 |
| EMC10         | 0.13  | 5.25E-01 | 0.04  | 8.57E-01 |
| FAM65A        | -0.08 | 6.80E-01 | 0.04  | 8.57E-01 |
| FAU           | 0.18  | 3.63E-01 | 0.04  | 8.57E-01 |
| G25089        | -0.22 | 2.68E-01 | -0.04 | 8.57E-01 |
| GAS7          | -0.06 | 7.71E-01 | -0.04 | 8.57E-01 |
| HDAC6         | 0.09  | 6.58E-01 | -0.04 | 8.57E-01 |
| HNRNPA1       | -0.05 | 7.92E-01 | -0.04 | 8.57E-01 |
| HNRNPF        | 0.13  | 5.26E-01 | -0.04 | 8.57E-01 |
| IQCH          | -0.06 | 7.61E-01 | 0.04  | 8.57E-01 |
| KDSR          | -0.11 | 5.76E-01 | -0.04 | 8.57E-01 |
| KIAA0101      | 0.24  | 2.18E-01 | -0.04 | 8.57E-01 |
| LINC00189     | -0.11 | 5.73E-01 | -0.04 | 8.57E-01 |
| MSRB3         | 0.00  | 9.96E-01 | -0.04 | 8.57E-01 |
| POLR1B        | 0.15  | 4.39E-01 | -0.04 | 8.57E-01 |
| PPIA          | 0.13  | 4.93E-01 | 0.04  | 8.57E-01 |
| QRSL1         | 0.18  | 3.63E-01 | -0.04 | 8.57E-01 |
| RBPM5         | -0.07 | 7.30E-01 | -0.04 | 8.57E-01 |
| RP11-127L20.3 | 0.03  | 8.67E-01 | -0.04 | 8.57E-01 |
| RP11-342M1.3  | -0.05 | 7.84E-01 | -0.04 | 8.57E-01 |
| RP11-53B2.5   | 0.13  | 5.13E-01 | 0.04  | 8.57E-01 |
| RP4-534N18.2  | 0.26  | 1.83E-01 | 0.04  | 8.57E-01 |
| RPL34         | 0.19  | 3.39E-01 | -0.04 | 8.57E-01 |
| RPS23P6       | 0.05  | 8.19E-01 | 0.04  | 8.57E-01 |
| RPSAP53       | 0.17  | 3.96E-01 | 0.04  | 8.57E-01 |
| SUOX          | 0.18  | 3.49E-01 | 0.04  | 8.57E-01 |
| TMEM213       | -0.06 | 7.44E-01 | -0.04 | 8.57E-01 |
| TNRC6A        | -0.18 | 3.53E-01 | 0.04  | 8.57E-01 |
| TPRG1L        | -0.07 | 7.13E-01 | 0.04  | 8.57E-01 |
| XLOC_008050   | -0.09 | 6.57E-01 | 0.04  | 8.57E-01 |
| XLOC_010591   | 0.15  | 4.37E-01 | 0.04  | 8.57E-01 |

|                         |       |          |       |          |
|-------------------------|-------|----------|-------|----------|
| <b>KXbac-B562F10.11</b> | -0.18 | 3.59E-01 | 0.04  | 8.57E-01 |
| <b>ZNF85</b>            | -0.02 | 9.02E-01 | 0.04  | 8.57E-01 |
| <b>ABCC4</b>            | -0.23 | 2.39E-01 | -0.04 | 8.58E-01 |
| <b>BTF3L4P2</b>         | 0.01  | 9.64E-01 | 0.04  | 8.58E-01 |
| <b>C20orf24</b>         | 0.25  | 1.99E-01 | 0.04  | 8.58E-01 |
| <b>CHCHD7</b>           | 0.07  | 7.29E-01 | 0.04  | 8.58E-01 |
| <b>G42332</b>           | -0.04 | 8.37E-01 | 0.04  | 8.58E-01 |
| <b>GPR135</b>           | -0.22 | 2.66E-01 | 0.04  | 8.58E-01 |
| <b>GRIK1-AS1</b>        | 0.19  | 3.41E-01 | -0.04 | 8.58E-01 |
| <b>HOXA3</b>            | 0.06  | 7.49E-01 | 0.04  | 8.58E-01 |
| <b>IL16</b>             | -0.23 | 2.37E-01 | 0.04  | 8.58E-01 |
| <b>KLK9</b>             | -0.04 | 8.50E-01 | -0.04 | 8.58E-01 |
| <b>LINC00863</b>        | -0.10 | 6.13E-01 | 0.04  | 8.58E-01 |
| <b>MIR26B</b>           | -0.04 | 8.35E-01 | -0.04 | 8.58E-01 |
| <b>MIR941-1</b>         | 0.12  | 5.54E-01 | -0.04 | 8.58E-01 |
| <b>NPC1L1</b>           | 0.40  | 3.65E-02 | 0.04  | 8.58E-01 |
| <b>PABPN1</b>           | 0.01  | 9.45E-01 | -0.04 | 8.58E-01 |
| <b>PERP</b>             | 0.07  | 7.18E-01 | 0.04  | 8.58E-01 |
| <b>PHKA2-AS1</b>        | -0.13 | 5.01E-01 | 0.04  | 8.58E-01 |
| <b>PPAN</b>             | 0.23  | 2.44E-01 | 0.04  | 8.58E-01 |
| <b>PTPRG-AS1</b>        | -0.24 | 2.10E-01 | -0.04 | 8.58E-01 |
| <b>RAET1E-AS1</b>       | -0.27 | 1.60E-01 | -0.04 | 8.58E-01 |
| <b>RBM12</b>            | 0.19  | 3.44E-01 | 0.04  | 8.58E-01 |
| <b>RN7SL501P</b>        | 0.39  | 3.95E-02 | 0.04  | 8.58E-01 |
| <b>RN7SL696P</b>        | -0.19 | 3.36E-01 | 0.04  | 8.58E-01 |
| <b>RP11-139H15.5</b>    | 0.04  | 8.42E-01 | -0.04 | 8.58E-01 |
| <b>RP11-190C22.8</b>    | -0.06 | 7.51E-01 | -0.04 | 8.58E-01 |
| <b>RP11-20O24.1</b>     | -0.02 | 9.21E-01 | -0.04 | 8.58E-01 |
| <b>RP11-349G13.3</b>    | 0.28  | 1.46E-01 | -0.04 | 8.58E-01 |
| <b>RP11-441O15.3</b>    | 0.22  | 2.52E-01 | -0.04 | 8.58E-01 |
| <b>RP11-473C19.1</b>    | -0.07 | 7.23E-01 | 0.04  | 8.58E-01 |
| <b>RP11-485M7.1</b>     | 0.30  | 1.27E-01 | 0.04  | 8.58E-01 |
| <b>RP11-501C14.9</b>    | 0.06  | 7.55E-01 | -0.04 | 8.58E-01 |
| <b>RP11-537E18.1</b>    | -0.05 | 8.03E-01 | -0.04 | 8.58E-01 |
| <b>RP5-1136G13.2</b>    | 0.43  | 2.37E-02 | 0.04  | 8.58E-01 |
| <b>STARD6</b>           | 0.09  | 6.56E-01 | -0.04 | 8.58E-01 |
| <b>TAGLN3</b>           | 0.05  | 8.10E-01 | 0.04  | 8.58E-01 |
| <b>TBRG1</b>            | 0.10  | 6.16E-01 | -0.04 | 8.58E-01 |
| <b>TRAPPC6A</b>         | -0.15 | 4.53E-01 | 0.04  | 8.58E-01 |
| <b>UBE2B</b>            | -0.36 | 6.35E-02 | 0.04  | 8.58E-01 |
| <b>XLOC_008020</b>      | 0.05  | 7.86E-01 | 0.04  | 8.58E-01 |
| <b>XLOC_009723</b>      | 0.37  | 5.01E-02 | -0.04 | 8.58E-01 |
| <b>XLOC_010575</b>      | -0.10 | 6.01E-01 | -0.04 | 8.58E-01 |
| <b>AC007679.4</b>       | -0.08 | 6.95E-01 | 0.04  | 8.60E-01 |
| <b>AK7</b>              | -0.22 | 2.63E-01 | -0.04 | 8.60E-01 |
| <b>AP001055.6</b>       | -0.04 | 8.42E-01 | 0.04  | 8.60E-01 |
| <b>ARMC4</b>            | 0.11  | 5.74E-01 | 0.04  | 8.60E-01 |

|                |       |          |       |          |
|----------------|-------|----------|-------|----------|
| BTBD8          | 0.09  | 6.63E-01 | 0.04  | 8.60E-01 |
| CALCR          | -0.05 | 8.01E-01 | 0.04  | 8.60E-01 |
| CTA-963H5.5    | 0.26  | 1.86E-01 | -0.04 | 8.60E-01 |
| DNAJC19P6      | -0.07 | 7.40E-01 | 0.04  | 8.60E-01 |
| EFNB1          | 0.05  | 7.91E-01 | -0.04 | 8.60E-01 |
| ELOF1          | 0.04  | 8.41E-01 | 0.04  | 8.60E-01 |
| GFOD1          | 0.01  | 9.58E-01 | 0.04  | 8.60E-01 |
| HEXB           | 0.06  | 7.52E-01 | 0.04  | 8.60E-01 |
| KPNA3          | -0.05 | 7.85E-01 | 0.04  | 8.60E-01 |
| LYSMD2         | 0.16  | 4.11E-01 | -0.04 | 8.60E-01 |
| MCM5           | 0.13  | 5.18E-01 | 0.04  | 8.60E-01 |
| MIR548E        | 0.18  | 3.72E-01 | -0.04 | 8.60E-01 |
| PDHX           | 0.20  | 3.12E-01 | -0.04 | 8.60E-01 |
| RAB5C          | 0.00  | 9.80E-01 | 0.04  | 8.60E-01 |
| RASGRF2        | -0.16 | 4.14E-01 | -0.04 | 8.60E-01 |
| RNF145         | 0.13  | 5.10E-01 | 0.04  | 8.60E-01 |
| RNU6-757P      | -0.21 | 2.93E-01 | 0.04  | 8.60E-01 |
| RP11-117D22.2  | 0.01  | 9.77E-01 | -0.04 | 8.60E-01 |
| RP11-243J18.2  | 0.09  | 6.54E-01 | -0.04 | 8.60E-01 |
| RP11-285G1.14  | 0.12  | 5.38E-01 | -0.04 | 8.60E-01 |
| RP11-367E12.4  | -0.20 | 3.00E-01 | 0.04  | 8.60E-01 |
| RP11-385F5.4   | -0.02 | 9.28E-01 | 0.04  | 8.60E-01 |
| RP11-394B5.2   | 0.25  | 1.97E-01 | 0.04  | 8.60E-01 |
| RP11-474P2.2   | 0.00  | 9.91E-01 | -0.04 | 8.60E-01 |
| RP11-506M12.1  | 0.04  | 8.42E-01 | 0.04  | 8.60E-01 |
| RP11-736K20.6  | -0.06 | 7.51E-01 | -0.04 | 8.60E-01 |
| RP3-323P24.3   | 0.29  | 1.40E-01 | -0.04 | 8.60E-01 |
| RP4-682C21.5   | -0.23 | 2.37E-01 | -0.04 | 8.60E-01 |
| RPL4P5         | -0.11 | 5.72E-01 | 0.04  | 8.60E-01 |
| SLC24A2        | -0.45 | 1.72E-02 | -0.04 | 8.60E-01 |
| TIMM50         | -0.02 | 9.04E-01 | -0.04 | 8.60E-01 |
| VIPR1-AS1      | 0.06  | 7.70E-01 | -0.04 | 8.60E-01 |
| XLOC_009885    | -0.21 | 2.82E-01 | -0.04 | 8.60E-01 |
| YWHAZP2        | -0.06 | 7.71E-01 | -0.04 | 8.60E-01 |
| AACSP1         | 0.27  | 1.60E-01 | -0.04 | 8.61E-01 |
| AC007000.11    | -0.26 | 1.78E-01 | -0.04 | 8.61E-01 |
| AC092811.1     | -0.06 | 7.67E-01 | 0.04  | 8.61E-01 |
| AC139530.1     | -0.14 | 4.72E-01 | -0.04 | 8.61E-01 |
| C11orf85       | 0.12  | 5.51E-01 | -0.04 | 8.61E-01 |
| CAPS2          | -0.04 | 8.40E-01 | 0.04  | 8.61E-01 |
| CEP76          | -0.02 | 9.14E-01 | -0.04 | 8.61E-01 |
| CPED1          | -0.04 | 8.22E-01 | 0.04  | 8.61E-01 |
| CTC-297N7.1    | 0.13  | 4.98E-01 | -0.04 | 8.61E-01 |
| CTD-2013N17.7  | 0.20  | 3.10E-01 | -0.04 | 8.61E-01 |
| CTD-2192J16.26 | 0.34  | 7.54E-02 | 0.04  | 8.61E-01 |
| CTD-2547L16.3  | -0.37 | 5.14E-02 | 0.04  | 8.61E-01 |
| FAM26F         | -0.05 | 7.85E-01 | 0.04  | 8.61E-01 |

|                      |       |          |       |          |
|----------------------|-------|----------|-------|----------|
| <b>GALNT12</b>       | -0.36 | 6.33E-02 | -0.04 | 8.61E-01 |
| <b>LA16c-329F2.2</b> | 0.05  | 7.95E-01 | -0.04 | 8.61E-01 |
| <b>MACROD2-AS1</b>   | 0.27  | 1.58E-01 | 0.04  | 8.61E-01 |
| <b>MRPS17</b>        | 0.19  | 3.31E-01 | 0.04  | 8.61E-01 |
| <b>MRRF</b>          | 0.32  | 9.87E-02 | 0.04  | 8.61E-01 |
| <b>MYCBP2</b>        | -0.10 | 6.11E-01 | 0.04  | 8.61E-01 |
| <b>NR3C1</b>         | -0.07 | 7.05E-01 | -0.04 | 8.61E-01 |
| <b>PFDN4</b>         | 0.04  | 8.42E-01 | -0.04 | 8.61E-01 |
| <b>PLP2</b>          | -0.06 | 7.43E-01 | 0.04  | 8.61E-01 |
| <b>PPCS</b>          | 0.17  | 3.96E-01 | 0.04  | 8.61E-01 |
| <b>RNU7-140P</b>     | 0.08  | 6.87E-01 | -0.04 | 8.61E-01 |
| <b>RP11-347C18.1</b> | 0.13  | 5.20E-01 | 0.04  | 8.61E-01 |
| <b>RP11-555K12.2</b> | -0.11 | 5.84E-01 | 0.04  | 8.61E-01 |
| <b>RP11-818O24.3</b> | -0.23 | 2.38E-01 | -0.04 | 8.61E-01 |
| <b>RP4-671O14.5</b>  | 0.23  | 2.48E-01 | 0.04  | 8.61E-01 |
| <b>RPL35</b>         | 0.09  | 6.41E-01 | -0.04 | 8.61E-01 |
| <b>SGOL1</b>         | 0.04  | 8.57E-01 | 0.04  | 8.61E-01 |
| <b>SKINTL</b>        | 0.05  | 7.89E-01 | 0.04  | 8.61E-01 |
| <b>SNORA17</b>       | -0.12 | 5.30E-01 | 0.04  | 8.61E-01 |
| <b>SNRPD3</b>        | 0.19  | 3.43E-01 | 0.04  | 8.61E-01 |
| <b>SNX2</b>          | -0.15 | 4.59E-01 | -0.04 | 8.61E-01 |
| <b>TRABD2A</b>       | 0.02  | 9.08E-01 | 0.04  | 8.61E-01 |
| <b>TRAJ14</b>        | 0.05  | 8.18E-01 | -0.04 | 8.61E-01 |
| <b>TRAJ26</b>        | 0.38  | 4.68E-02 | -0.04 | 8.61E-01 |
| <b>UBC</b>           | -0.10 | 5.97E-01 | 0.04  | 8.61E-01 |
| <b>AC013463.2</b>    | 0.07  | 7.30E-01 | 0.04  | 8.62E-01 |
| <b>AF011889.2</b>    | -0.16 | 4.05E-01 | 0.04  | 8.62E-01 |
| <b>AQP7</b>          | -0.08 | 6.83E-01 | -0.04 | 8.62E-01 |
| <b>ASCC3</b>         | 0.02  | 9.02E-01 | -0.04 | 8.62E-01 |
| <b>CATSPER2P1</b>    | -0.04 | 8.42E-01 | -0.04 | 8.62E-01 |
| <b>CTD-2287O16.5</b> | 0.17  | 3.87E-01 | 0.04  | 8.62E-01 |
| <b>CTD-2330K9.3</b>  | 0.06  | 7.44E-01 | 0.04  | 8.62E-01 |
| <b>DENND5B-AS1</b>   | -0.30 | 1.27E-01 | 0.04  | 8.62E-01 |
| <b>DMTF1</b>         | -0.14 | 4.91E-01 | -0.04 | 8.62E-01 |
| <b>EEF2KMT</b>       | 0.26  | 1.80E-01 | -0.04 | 8.62E-01 |
| <b>EFR3A</b>         | 0.10  | 6.03E-01 | -0.04 | 8.62E-01 |
| <b>EIF2S2P3</b>      | -0.21 | 2.73E-01 | 0.04  | 8.62E-01 |
| <b>FAM111B</b>       | 0.01  | 9.43E-01 | 0.04  | 8.62E-01 |
| <b>GPX8</b>          | -0.28 | 1.43E-01 | 0.04  | 8.62E-01 |
| <b>HOMER2</b>        | -0.11 | 5.66E-01 | -0.04 | 8.62E-01 |
| <b>IP6K2</b>         | -0.12 | 5.28E-01 | -0.04 | 8.62E-01 |
| <b>LINC00640</b>     | -0.24 | 2.28E-01 | -0.04 | 8.62E-01 |
| <b>LINC01058</b>     | -0.18 | 3.56E-01 | 0.04  | 8.62E-01 |
| <b>LRWD1</b>         | 0.16  | 4.17E-01 | 0.04  | 8.62E-01 |
| <b>MIR4731</b>       | 0.10  | 6.03E-01 | -0.04 | 8.62E-01 |
| <b>MSRA</b>          | -0.01 | 9.78E-01 | 0.04  | 8.62E-01 |
| <b>MTND2P26</b>      | 0.15  | 4.45E-01 | 0.04  | 8.62E-01 |



|               |       |          |       |          |
|---------------|-------|----------|-------|----------|
| MYOM2         | -0.21 | 2.83E-01 | -0.04 | 8.62E-01 |
| NPM1P27       | 0.11  | 5.83E-01 | -0.04 | 8.62E-01 |
| NUTM2G        | -0.07 | 7.24E-01 | 0.04  | 8.62E-01 |
| PBX3          | -0.11 | 5.63E-01 | -0.04 | 8.62E-01 |
| RAET1E        | -0.02 | 9.00E-01 | 0.04  | 8.62E-01 |
| RN7SKP9       | -0.08 | 6.84E-01 | 0.04  | 8.62E-01 |
| RP1-71H19.2   | 0.23  | 2.29E-01 | -0.04 | 8.62E-01 |
| RP11-121A14.2 | 0.09  | 6.53E-01 | 0.04  | 8.62E-01 |
| RP11-246E12.2 | 0.18  | 3.52E-01 | -0.04 | 8.62E-01 |
| RP11-793A3.2  | -0.15 | 4.54E-01 | -0.04 | 8.62E-01 |
| RP4-781K5.5   | 0.03  | 8.89E-01 | -0.04 | 8.62E-01 |
| RPL18AP7      | 0.10  | 6.12E-01 | 0.04  | 8.62E-01 |
| RPS12         | 0.32  | 1.01E-01 | -0.04 | 8.62E-01 |
| SLIT1         | -0.05 | 8.00E-01 | 0.04  | 8.62E-01 |
| TAOK2         | 0.07  | 7.24E-01 | 0.04  | 8.62E-01 |
| TERF2         | 0.14  | 4.72E-01 | -0.04 | 8.62E-01 |
| TMEM208       | 0.15  | 4.37E-01 | -0.04 | 8.62E-01 |
| UQCRH         | 0.12  | 5.48E-01 | 0.04  | 8.62E-01 |
| VPS8          | -0.20 | 3.04E-01 | -0.04 | 8.62E-01 |
| XLOC_008666   | 0.10  | 6.00E-01 | -0.04 | 8.62E-01 |
| AC005013.5    | -0.19 | 3.41E-01 | -0.03 | 8.63E-01 |
| AC083875.1    | 0.37  | 4.94E-02 | -0.03 | 8.63E-01 |
| ADCK2         | -0.02 | 9.06E-01 | 0.03  | 8.63E-01 |
| AKNAD1        | 0.22  | 2.67E-01 | -0.03 | 8.63E-01 |
| ALDH1B1       | 0.04  | 8.59E-01 | -0.03 | 8.63E-01 |
| BAZ2B         | -0.11 | 5.93E-01 | 0.03  | 8.63E-01 |
| CTD-3128G10.6 | -0.03 | 8.66E-01 | -0.03 | 8.63E-01 |
| CTD-3154N5.1  | -0.23 | 2.46E-01 | 0.03  | 8.63E-01 |
| DGKA          | -0.18 | 3.60E-01 | 0.03  | 8.63E-01 |
| KCNB1         | -0.05 | 8.02E-01 | 0.03  | 8.63E-01 |
| LINC00999     | -0.30 | 1.17E-01 | -0.03 | 8.63E-01 |
| PTCD1         | 0.17  | 3.82E-01 | -0.03 | 8.63E-01 |
| PURB          | 0.19  | 3.45E-01 | -0.03 | 8.63E-01 |
| RHBDL1        | 0.23  | 2.33E-01 | -0.03 | 8.63E-01 |
| RN7SL490P     | -0.02 | 9.09E-01 | -0.03 | 8.63E-01 |
| RNU6-484P     | -0.13 | 5.21E-01 | 0.03  | 8.63E-01 |
| RP11-278C7.3  | -0.38 | 4.39E-02 | 0.03  | 8.63E-01 |
| RP11-342M3.5  | -0.15 | 4.43E-01 | 0.03  | 8.63E-01 |
| RP11-51J9.5   | 0.15  | 4.41E-01 | -0.03 | 8.63E-01 |
| RP3-507I15.2  | -0.01 | 9.48E-01 | -0.03 | 8.63E-01 |
| RYBP          | -0.08 | 7.03E-01 | 0.03  | 8.63E-01 |
| SOWAHA        | 0.35  | 6.89E-02 | 0.03  | 8.63E-01 |
| ZNF600        | -0.18 | 3.55E-01 | 0.03  | 8.63E-01 |
| ZNF761        | -0.07 | 7.35E-01 | -0.03 | 8.63E-01 |
| ATG101        | 0.05  | 8.09E-01 | -0.03 | 8.64E-01 |
| C6orf62       | 0.32  | 9.15E-02 | 0.03  | 8.64E-01 |
| CNOT6L        | -0.05 | 8.03E-01 | -0.03 | 8.64E-01 |

|                       |       |          |       |          |
|-----------------------|-------|----------|-------|----------|
| <b>HOXD-AS2</b>       | -0.13 | 4.99E-01 | -0.03 | 8.64E-01 |
| <b>L34079.3</b>       | -0.30 | 1.16E-01 | -0.03 | 8.64E-01 |
| <b>LAMA5</b>          | -0.08 | 6.74E-01 | 0.03  | 8.64E-01 |
| <b>MCU</b>            | 0.02  | 9.26E-01 | -0.03 | 8.64E-01 |
| <b>METTL15</b>        | 0.07  | 7.33E-01 | -0.03 | 8.64E-01 |
| <b>MITD1</b>          | -0.18 | 3.60E-01 | 0.03  | 8.64E-01 |
| <b>NOC3L</b>          | 0.07  | 7.41E-01 | -0.03 | 8.64E-01 |
| <b>PEX5</b>           | 0.21  | 2.85E-01 | 0.03  | 8.64E-01 |
| <b>PPIL3</b>          | 0.15  | 4.49E-01 | -0.03 | 8.64E-01 |
| <b>PSMD5-AS1</b>      | -0.10 | 6.30E-01 | 0.03  | 8.64E-01 |
| <b>REM1</b>           | -0.21 | 2.89E-01 | 0.03  | 8.64E-01 |
| <b>RGS17P1</b>        | -0.08 | 6.74E-01 | -0.03 | 8.64E-01 |
| <b>RNU6-881P</b>      | -0.38 | 4.78E-02 | -0.03 | 8.64E-01 |
| <b>RP11-1012E15.2</b> | 0.03  | 8.87E-01 | 0.03  | 8.64E-01 |
| <b>RP11-1281K21.1</b> | -0.18 | 3.57E-01 | -0.03 | 8.64E-01 |
| <b>RP11-154F14.3</b>  | 0.15  | 4.39E-01 | 0.03  | 8.64E-01 |
| <b>RP11-226M10.3</b>  | 0.04  | 8.44E-01 | -0.03 | 8.64E-01 |
| <b>RP11-438N5.4</b>   | -0.26 | 1.87E-01 | 0.03  | 8.64E-01 |
| <b>RP11-561C5.4</b>   | -0.16 | 4.11E-01 | 0.03  | 8.64E-01 |
| <b>RP11-573M3.3</b>   | -0.05 | 8.11E-01 | -0.03 | 8.64E-01 |
| <b>RP4-647C14.3</b>   | 0.38  | 4.89E-02 | -0.03 | 8.64E-01 |
| <b>RP5-1071N3.1</b>   | -0.07 | 7.26E-01 | 0.03  | 8.64E-01 |
| <b>RPS24P16</b>       | -0.05 | 7.94E-01 | 0.03  | 8.64E-01 |
| <b>SOBP</b>           | -0.14 | 4.81E-01 | 0.03  | 8.64E-01 |
| <b>ST13P4</b>         | -0.16 | 4.09E-01 | 0.03  | 8.64E-01 |
| <b>TAS2R3</b>         | -0.21 | 2.91E-01 | -0.03 | 8.64E-01 |
| <b>TTC28-AS1</b>      | 0.03  | 8.61E-01 | 0.03  | 8.64E-01 |
| <b>AC092338.5</b>     | -0.34 | 7.37E-02 | -0.03 | 8.65E-01 |
| <b>AGPAT2</b>         | 0.06  | 7.53E-01 | -0.03 | 8.65E-01 |
| <b>AP006621.5</b>     | -0.01 | 9.43E-01 | -0.03 | 8.65E-01 |
| <b>BLK</b>            | -0.03 | 8.77E-01 | 0.03  | 8.65E-01 |
| <b>C9orf16</b>        | 0.33  | 8.48E-02 | -0.03 | 8.65E-01 |
| <b>CCDC189</b>        | 0.23  | 2.43E-01 | 0.03  | 8.65E-01 |
| <b>CDRT15P1</b>       | -0.31 | 1.06E-01 | 0.03  | 8.65E-01 |
| <b>DAPK1</b>          | -0.06 | 7.65E-01 | -0.03 | 8.65E-01 |
| <b>ERLIN1</b>         | 0.01  | 9.79E-01 | -0.03 | 8.65E-01 |
| <b>FREM1</b>          | -0.17 | 3.99E-01 | 0.03  | 8.65E-01 |
| <b>G25496</b>         | -0.11 | 5.81E-01 | 0.03  | 8.65E-01 |
| <b>GRK5-IT1</b>       | -0.16 | 4.20E-01 | -0.03 | 8.65E-01 |
| <b>IGHEP2</b>         | -0.04 | 8.57E-01 | -0.03 | 8.65E-01 |
| <b>LINC01139</b>      | 0.05  | 7.85E-01 | -0.03 | 8.65E-01 |
| <b>MND1</b>           | -0.07 | 7.42E-01 | 0.03  | 8.65E-01 |
| <b>MTCO2P11</b>       | -0.06 | 7.62E-01 | 0.03  | 8.65E-01 |
| <b>PNPLA4</b>         | -0.30 | 1.20E-01 | 0.03  | 8.65E-01 |
| <b>PUF60</b>          | 0.11  | 5.93E-01 | 0.03  | 8.65E-01 |
| <b>RACGAP1</b>        | 0.08  | 6.84E-01 | 0.03  | 8.65E-01 |
| <b>RNU6-432P</b>      | 0.07  | 7.35E-01 | -0.03 | 8.65E-01 |

|               |       |          |       |          |
|---------------|-------|----------|-------|----------|
| RP11-148B18.1 | -0.12 | 5.50E-01 | -0.03 | 8.65E-01 |
| RP11-295H24.5 | 0.32  | 9.62E-02 | 0.03  | 8.65E-01 |
| RP11-362L22.1 | 0.12  | 5.54E-01 | -0.03 | 8.65E-01 |
| RP11-440I14.3 | -0.05 | 8.18E-01 | -0.03 | 8.65E-01 |
| RP11-648O15.1 | 0.13  | 5.04E-01 | 0.03  | 8.65E-01 |
| RP5-837J1.4   | 0.28  | 1.52E-01 | -0.03 | 8.65E-01 |
| SEC62-AS1     | 0.05  | 7.89E-01 | -0.03 | 8.65E-01 |
| SLC22A18AS    | 0.07  | 7.18E-01 | 0.03  | 8.65E-01 |
| TDGF1P5       | 0.22  | 2.61E-01 | -0.03 | 8.65E-01 |
| VN1R42P       | 0.14  | 4.82E-01 | 0.03  | 8.65E-01 |
| XLOC_009000   | 0.01  | 9.48E-01 | -0.03 | 8.65E-01 |
| ZNF597        | 0.29  | 1.32E-01 | -0.03 | 8.65E-01 |
| ACTB          | 0.14  | 4.73E-01 | 0.03  | 8.67E-01 |
| ARMC6         | 0.04  | 8.51E-01 | 0.03  | 8.67E-01 |
| BACH1         | 0.10  | 6.22E-01 | 0.03  | 8.67E-01 |
| DNAJA3        | 0.21  | 2.86E-01 | 0.03  | 8.67E-01 |
| PARK7         | 0.16  | 4.25E-01 | 0.03  | 8.67E-01 |
| RN7SL247P     | 0.29  | 1.35E-01 | 0.03  | 8.67E-01 |
| RP11-335O4.3  | 0.25  | 1.95E-01 | 0.03  | 8.67E-01 |
| RP11-384C4.2  | 0.21  | 2.73E-01 | 0.03  | 8.67E-01 |
| RP11-5L12.1   | 0.01  | 9.51E-01 | 0.03  | 8.67E-01 |
| RTF1          | -0.07 | 7.41E-01 | 0.03  | 8.67E-01 |
| SAMD8         | 0.50  | 6.14E-03 | 0.03  | 8.67E-01 |
| UTP11L        | 0.31  | 1.10E-01 | 0.03  | 8.67E-01 |
| XLOC_001286   | -0.07 | 7.24E-01 | 0.03  | 8.67E-01 |
| AC005351.1    | 0.19  | 3.41E-01 | -0.03 | 8.67E-01 |
| AC138965.1    | 0.03  | 8.81E-01 | -0.03 | 8.67E-01 |
| CASC5         | 0.06  | 7.73E-01 | -0.03 | 8.67E-01 |
| CTD-2281E23.2 | 0.00  | 9.88E-01 | -0.03 | 8.67E-01 |
| ITIH4         | -0.13 | 5.03E-01 | -0.03 | 8.67E-01 |
| KRIT1         | 0.08  | 7.00E-01 | -0.03 | 8.67E-01 |
| LINC00909     | 0.38  | 4.78E-02 | -0.03 | 8.67E-01 |
| RP11-136F16.2 | 0.33  | 8.21E-02 | -0.03 | 8.67E-01 |
| RP11-390K5.6  | -0.10 | 6.25E-01 | -0.03 | 8.67E-01 |
| RP5-935K16.2  | -0.06 | 7.70E-01 | -0.03 | 8.67E-01 |
| RPN1          | 0.05  | 8.10E-01 | -0.03 | 8.67E-01 |
| SIRT5         | 0.00  | 9.87E-01 | -0.03 | 8.67E-01 |
| SNORD96B      | 0.07  | 7.36E-01 | -0.03 | 8.67E-01 |
| TIMP3         | -0.23 | 2.41E-01 | -0.03 | 8.67E-01 |
| WWC2          | -0.04 | 8.38E-01 | -0.03 | 8.67E-01 |
| AC007563.1    | -0.18 | 3.56E-01 | -0.03 | 8.68E-01 |
| AC116366.5    | -0.30 | 1.15E-01 | -0.03 | 8.68E-01 |
| AD000684.2    | 0.13  | 4.95E-01 | 0.03  | 8.68E-01 |
| C9orf64       | 0.05  | 8.09E-01 | -0.03 | 8.68E-01 |
| CEACAM4       | -0.07 | 7.24E-01 | -0.03 | 8.68E-01 |
| CECR3         | -0.10 | 6.14E-01 | 0.03  | 8.68E-01 |
| CSDC2         | -0.13 | 5.20E-01 | 0.03  | 8.68E-01 |

|                |       |          |       |          |
|----------------|-------|----------|-------|----------|
| CTD-2331H12.5  | -0.09 | 6.62E-01 | -0.03 | 8.68E-01 |
| CTD-2503O16.4  | -0.07 | 7.25E-01 | -0.03 | 8.68E-01 |
| CTD-3099C6.11  | -0.21 | 2.78E-01 | 0.03  | 8.68E-01 |
| DIAPH1         | -0.02 | 9.32E-01 | 0.03  | 8.68E-01 |
| EML4           | 0.11  | 5.75E-01 | 0.03  | 8.68E-01 |
| FAM71E1        | 0.09  | 6.66E-01 | -0.03 | 8.68E-01 |
| GGCT           | -0.16 | 4.29E-01 | -0.03 | 8.68E-01 |
| HMGB3P4        | 0.20  | 3.02E-01 | -0.03 | 8.68E-01 |
| ITPKB          | -0.37 | 5.38E-02 | 0.03  | 8.68E-01 |
| LIF            | -0.13 | 4.93E-01 | -0.03 | 8.68E-01 |
| LINC01119      | 0.05  | 7.82E-01 | -0.03 | 8.68E-01 |
| MIR548H1       | 0.17  | 3.74E-01 | 0.03  | 8.68E-01 |
| PNPT1          | 0.18  | 3.49E-01 | 0.03  | 8.68E-01 |
| PVT1           | 0.01  | 9.58E-01 | 0.03  | 8.68E-01 |
| RADIL          | -0.22 | 2.62E-01 | 0.03  | 8.68E-01 |
| RARB           | 0.05  | 8.02E-01 | -0.03 | 8.68E-01 |
| RP11-1018N14.5 | -0.16 | 4.18E-01 | -0.03 | 8.68E-01 |
| RP11-214K3.19  | -0.09 | 6.43E-01 | 0.03  | 8.68E-01 |
| RP11-365F18.3  | -0.22 | 2.56E-01 | 0.03  | 8.68E-01 |
| RP11-413H22.2  | 0.10  | 6.15E-01 | -0.03 | 8.68E-01 |
| RP11-498M15.1  | 0.13  | 5.23E-01 | -0.03 | 8.68E-01 |
| RP11-582E3.2   | -0.33 | 8.62E-02 | 0.03  | 8.68E-01 |
| RPS13P2        | 0.08  | 6.83E-01 | -0.03 | 8.68E-01 |
| SLC25A25       | 0.09  | 6.65E-01 | 0.03  | 8.68E-01 |
| TRAV12-1       | 0.05  | 8.11E-01 | -0.03 | 8.68E-01 |
| URB2           | 0.09  | 6.53E-01 | 0.03  | 8.68E-01 |
| ATXN2          | -0.29 | 1.39E-01 | 0.03  | 8.69E-01 |
| COL4A3BP       | -0.22 | 2.62E-01 | 0.03  | 8.69E-01 |
| COQ10B         | 0.22  | 2.70E-01 | 0.03  | 8.69E-01 |
| DNAJB5-AS1     | 0.19  | 3.44E-01 | 0.03  | 8.69E-01 |
| G42644         | -0.07 | 7.13E-01 | 0.03  | 8.69E-01 |
| GHRL           | -0.21 | 2.89E-01 | 0.03  | 8.69E-01 |
| KNOP1          | 0.06  | 7.50E-01 | 0.03  | 8.69E-01 |
| LMF1-AS1       | -0.21 | 2.73E-01 | 0.03  | 8.69E-01 |
| OST4           | 0.02  | 9.27E-01 | 0.03  | 8.69E-01 |
| PCAT14         | -0.25 | 1.95E-01 | 0.03  | 8.69E-01 |
| PRDX1          | 0.10  | 6.22E-01 | 0.03  | 8.69E-01 |
| RAB10          | 0.21  | 2.84E-01 | 0.03  | 8.69E-01 |
| RNA5SP168      | -0.08 | 6.94E-01 | 0.03  | 8.69E-01 |
| RNA5SP300      | 0.03  | 8.93E-01 | 0.03  | 8.69E-01 |
| RP11-359M6.2   | -0.34 | 7.22E-02 | 0.03  | 8.69E-01 |
| RP11-64C12.3   | -0.27 | 1.70E-01 | 0.03  | 8.69E-01 |
| RP5-1000K24.2  | -0.03 | 8.80E-01 | 0.03  | 8.69E-01 |
| RP5-864K19.4   | -0.34 | 7.87E-02 | 0.03  | 8.69E-01 |
| RPL31          | 0.19  | 3.31E-01 | 0.03  | 8.69E-01 |
| SKA1           | 0.07  | 7.36E-01 | 0.03  | 8.69E-01 |
| SLC39A3        | 0.10  | 6.14E-01 | 0.03  | 8.69E-01 |

|                      |       |          |       |          |
|----------------------|-------|----------|-------|----------|
| <b>SLC4A4</b>        | -0.18 | 3.48E-01 | 0.03  | 8.69E-01 |
| <b>SNAP47-AS1</b>    | -0.23 | 2.44E-01 | 0.03  | 8.69E-01 |
| <b>SRPRB</b>         | 0.33  | 8.92E-02 | 0.03  | 8.69E-01 |
| <b>TM2D3</b>         | 0.07  | 7.09E-01 | 0.03  | 8.69E-01 |
| <b>TRIM28</b>        | 0.03  | 8.74E-01 | 0.03  | 8.69E-01 |
| <b>YWHAQ</b>         | 0.26  | 1.80E-01 | 0.03  | 8.69E-01 |
| <b>ZNF616</b>        | -0.25 | 2.07E-01 | 0.03  | 8.69E-01 |
| <b>CCDC138</b>       | 0.18  | 3.55E-01 | -0.03 | 8.69E-01 |
| <b>CCT6A</b>         | 0.19  | 3.30E-01 | -0.03 | 8.69E-01 |
| <b>CETP</b>          | -0.10 | 6.14E-01 | -0.03 | 8.69E-01 |
| <b>CTB-131B5.2</b>   | -0.36 | 6.22E-02 | -0.03 | 8.69E-01 |
| <b>CTD-2659N19.9</b> | 0.12  | 5.35E-01 | -0.03 | 8.69E-01 |
| <b>FAM114A1</b>      | 0.02  | 9.18E-01 | -0.03 | 8.69E-01 |
| <b>GHITM</b>         | 0.22  | 2.71E-01 | -0.03 | 8.69E-01 |
| <b>HLA-B</b>         | -0.05 | 8.16E-01 | -0.03 | 8.69E-01 |
| <b>LRRC16B</b>       | 0.08  | 6.97E-01 | -0.03 | 8.69E-01 |
| <b>NANOGP9</b>       | 0.07  | 7.28E-01 | -0.03 | 8.69E-01 |
| <b>NSMF</b>          | 0.09  | 6.39E-01 | -0.03 | 8.69E-01 |
| <b>OPN1LW</b>        | 0.07  | 7.36E-01 | -0.03 | 8.69E-01 |
| <b>OTUD6B-AS1</b>    | 0.01  | 9.65E-01 | -0.03 | 8.69E-01 |
| <b>PPP1R15B</b>      | 0.16  | 4.13E-01 | -0.03 | 8.69E-01 |
| <b>RP1-244F24.1</b>  | 0.09  | 6.37E-01 | -0.03 | 8.69E-01 |
| <b>RP11-293M10.6</b> | -0.07 | 7.30E-01 | -0.03 | 8.69E-01 |
| <b>RP3-466I7.1</b>   | 0.02  | 9.08E-01 | -0.03 | 8.69E-01 |
| <b>RP5-1115A15.2</b> | -0.14 | 4.66E-01 | -0.03 | 8.69E-01 |
| <b>RRM2P3</b>        | -0.19 | 3.29E-01 | -0.03 | 8.69E-01 |
| <b>SNORD66</b>       | 0.10  | 5.99E-01 | -0.03 | 8.69E-01 |
| <b>AC002550.6</b>    | 0.00  | 9.86E-01 | 0.03  | 8.70E-01 |
| <b>AC008073.9</b>    | 0.13  | 5.15E-01 | -0.03 | 8.70E-01 |
| <b>AC068580.6</b>    | -0.07 | 7.27E-01 | -0.03 | 8.70E-01 |
| <b>ARHGAP35</b>      | 0.15  | 4.49E-01 | 0.03  | 8.70E-01 |
| <b>ARTN</b>          | 0.07  | 7.33E-01 | 0.03  | 8.70E-01 |
| <b>CCDC142</b>       | 0.10  | 6.13E-01 | 0.03  | 8.70E-01 |
| <b>CHMP1B</b>        | 0.07  | 7.17E-01 | -0.03 | 8.70E-01 |
| <b>CTC-301O7.4</b>   | 0.03  | 8.70E-01 | -0.03 | 8.70E-01 |
| <b>FBRSL1</b>        | 0.18  | 3.72E-01 | -0.03 | 8.70E-01 |
| <b>GCAT</b>          | 0.33  | 8.98E-02 | 0.03  | 8.70E-01 |
| <b>GMPPB</b>         | 0.01  | 9.60E-01 | 0.03  | 8.70E-01 |
| <b>GRB2</b>          | 0.10  | 5.96E-01 | 0.03  | 8.70E-01 |
| <b>HIST1H2BE</b>     | -0.02 | 9.00E-01 | 0.03  | 8.70E-01 |
| <b>METTL22</b>       | -0.15 | 4.53E-01 | -0.03 | 8.70E-01 |
| <b>NIF3L1</b>        | 0.07  | 7.17E-01 | 0.03  | 8.70E-01 |
| <b>NSA2</b>          | 0.13  | 5.14E-01 | -0.03 | 8.70E-01 |
| <b>OSTC</b>          | 0.12  | 5.34E-01 | -0.03 | 8.70E-01 |
| <b>PALLD</b>         | 0.20  | 3.06E-01 | 0.03  | 8.70E-01 |
| <b>PKNOX2-AS1</b>    | 0.18  | 3.63E-01 | -0.03 | 8.70E-01 |
| <b>PTRF</b>          | -0.14 | 4.92E-01 | -0.03 | 8.70E-01 |

|                       |       |          |       |          |
|-----------------------|-------|----------|-------|----------|
| <b>RN7SKP35</b>       | 0.03  | 8.98E-01 | -0.03 | 8.70E-01 |
| <b>RP11-1250I15.2</b> | -0.22 | 2.55E-01 | -0.03 | 8.70E-01 |
| <b>RP11-454H13.1</b>  | 0.12  | 5.29E-01 | 0.03  | 8.70E-01 |
| <b>RP11-47I22.2</b>   | -0.05 | 7.91E-01 | -0.03 | 8.70E-01 |
| <b>RP11-834C11.5</b>  | -0.06 | 7.80E-01 | -0.03 | 8.70E-01 |
| <b>SERPINB10</b>      | 0.00  | 9.83E-01 | 0.03  | 8.70E-01 |
| <b>SPNS1</b>          | -0.14 | 4.87E-01 | 0.03  | 8.70E-01 |
| <b>STRIP2</b>         | -0.09 | 6.32E-01 | 0.03  | 8.70E-01 |
| <b>TMEM87B</b>        | 0.34  | 8.02E-02 | 0.03  | 8.70E-01 |
| <b>TRBV3-1</b>        | 0.22  | 2.57E-01 | 0.03  | 8.70E-01 |
| <b>UBE2J2</b>         | 0.16  | 4.06E-01 | -0.03 | 8.70E-01 |
| <b>UBQLNL</b>         | 0.16  | 4.05E-01 | -0.03 | 8.70E-01 |
| <b>ZNF808</b>         | -0.02 | 9.04E-01 | 0.03  | 8.70E-01 |
| <b>AC005189.6</b>     | -0.21 | 2.75E-01 | -0.03 | 8.71E-01 |
| <b>AC005776.1</b>     | -0.24 | 2.16E-01 | -0.03 | 8.71E-01 |
| <b>ATG4A</b>          | 0.24  | 2.14E-01 | -0.03 | 8.71E-01 |
| <b>C8orf59</b>        | -0.26 | 1.88E-01 | -0.03 | 8.71E-01 |
| <b>CTD-2206N4.4</b>   | 0.19  | 3.27E-01 | -0.03 | 8.71E-01 |
| <b>DEFB4B</b>         | 0.26  | 1.78E-01 | -0.03 | 8.71E-01 |
| <b>DYNLRB2</b>        | -0.15 | 4.58E-01 | -0.03 | 8.71E-01 |
| <b>FTX</b>            | 0.03  | 8.98E-01 | -0.03 | 8.71E-01 |
| <b>G35150</b>         | 0.04  | 8.35E-01 | -0.03 | 8.71E-01 |
| <b>GAS8-AS1</b>       | -0.07 | 7.11E-01 | -0.03 | 8.71E-01 |
| <b>GPSM2</b>          | 0.43  | 2.30E-02 | -0.03 | 8.71E-01 |
| <b>HEMK1</b>          | -0.05 | 8.16E-01 | -0.03 | 8.71E-01 |
| <b>IGLV3-1</b>        | 0.34  | 7.61E-02 | -0.03 | 8.71E-01 |
| <b>LINC00479</b>      | -0.21 | 2.93E-01 | -0.03 | 8.71E-01 |
| <b>MIR3139</b>        | 0.20  | 3.17E-01 | -0.03 | 8.71E-01 |
| <b>NCBP1</b>          | -0.01 | 9.65E-01 | -0.03 | 8.71E-01 |
| <b>PERM1</b>          | -0.03 | 8.77E-01 | -0.03 | 8.71E-01 |
| <b>PSMC6</b>          | 0.14  | 4.69E-01 | -0.03 | 8.71E-01 |
| <b>RP11-554F20.1</b>  | -0.29 | 1.35E-01 | -0.03 | 8.71E-01 |
| <b>RP11-616K22.2</b>  | 0.20  | 3.07E-01 | -0.03 | 8.71E-01 |
| <b>RP3-426I6.6</b>    | 0.50  | 6.89E-03 | -0.03 | 8.71E-01 |
| <b>RP6-109B7.4</b>    | -0.19 | 3.30E-01 | -0.03 | 8.71E-01 |
| <b>SESN1</b>          | 0.17  | 3.92E-01 | -0.03 | 8.71E-01 |
| <b>SIGIRR</b>         | 0.02  | 9.27E-01 | -0.03 | 8.71E-01 |
| <b>SOCS5</b>          | 0.04  | 8.29E-01 | -0.03 | 8.71E-01 |
| <b>AC092574.2</b>     | 0.22  | 2.63E-01 | 0.03  | 8.71E-01 |
| <b>ARF1P2</b>         | -0.27 | 1.66E-01 | 0.03  | 8.71E-01 |
| <b>FBXO24</b>         | 0.00  | 9.96E-01 | 0.03  | 8.71E-01 |
| <b>GDPD1</b>          | -0.10 | 6.17E-01 | 0.03  | 8.71E-01 |
| <b>INSC</b>           | -0.15 | 4.54E-01 | 0.03  | 8.71E-01 |
| <b>INTS3</b>          | -0.18 | 3.53E-01 | 0.03  | 8.71E-01 |
| <b>KIAA1549</b>       | -0.18 | 3.66E-01 | 0.03  | 8.71E-01 |
| <b>KRCC1</b>          | 0.01  | 9.50E-01 | 0.03  | 8.71E-01 |
| <b>MED24</b>          | 0.26  | 1.74E-01 | 0.03  | 8.71E-01 |

|                |       |          |       |          |
|----------------|-------|----------|-------|----------|
| NR1H2          | 0.32  | 1.02E-01 | 0.03  | 8.71E-01 |
| RBBP6          | 0.08  | 6.91E-01 | 0.03  | 8.71E-01 |
| RP11-142C4.5   | 0.26  | 1.87E-01 | 0.03  | 8.71E-01 |
| RP11-513M16.7  | -0.07 | 7.06E-01 | 0.03  | 8.71E-01 |
| RP11-687E1.2   | -0.01 | 9.70E-01 | 0.03  | 8.71E-01 |
| RP11-77A13.1   | 0.19  | 3.38E-01 | 0.03  | 8.71E-01 |
| RP11-834C11.15 | -0.20 | 3.05E-01 | 0.03  | 8.71E-01 |
| SNAP23P        | 0.16  | 4.05E-01 | 0.03  | 8.71E-01 |
| SPTLC1         | 0.07  | 7.26E-01 | 0.03  | 8.71E-01 |
| ST3GAL4-AS1    | -0.17 | 3.82E-01 | 0.03  | 8.71E-01 |
| AFF1           | -0.28 | 1.49E-01 | -0.03 | 8.73E-01 |
| AGPAT5         | 0.12  | 5.50E-01 | -0.03 | 8.73E-01 |
| AL136303.1     | -0.02 | 9.01E-01 | -0.03 | 8.73E-01 |
| AP003774.4     | 0.05  | 7.86E-01 | -0.03 | 8.73E-01 |
| AUNIP          | 0.36  | 5.84E-02 | -0.03 | 8.73E-01 |
| BCAM           | 0.11  | 5.90E-01 | 0.03  | 8.73E-01 |
| C15orf40       | 0.10  | 6.25E-01 | -0.03 | 8.73E-01 |
| CLIC5          | -0.27 | 1.70E-01 | 0.03  | 8.73E-01 |
| CTC-518B2.9    | 0.22  | 2.61E-01 | -0.03 | 8.73E-01 |
| EIF3L          | -0.05 | 7.84E-01 | -0.03 | 8.73E-01 |
| EXTL2          | 0.00  | 9.86E-01 | -0.03 | 8.73E-01 |
| KDELC1P1       | 0.03  | 8.90E-01 | -0.03 | 8.73E-01 |
| MTND5P26       | -0.12 | 5.52E-01 | -0.03 | 8.73E-01 |
| NLK            | -0.10 | 6.30E-01 | -0.03 | 8.73E-01 |
| PPM1L          | -0.11 | 5.83E-01 | 0.03  | 8.73E-01 |
| RAB6A          | 0.24  | 2.27E-01 | -0.03 | 8.73E-01 |
| RDM1           | 0.12  | 5.50E-01 | 0.03  | 8.73E-01 |
| RN7SKP171      | -0.16 | 4.02E-01 | 0.03  | 8.73E-01 |
| RNU4-87P       | -0.08 | 6.87E-01 | -0.03 | 8.73E-01 |
| RNU6-96P       | 0.22  | 2.54E-01 | 0.03  | 8.73E-01 |
| RP11-141C7.3   | 0.04  | 8.42E-01 | 0.03  | 8.73E-01 |
| RP11-216N14.7  | -0.05 | 8.09E-01 | -0.03 | 8.73E-01 |
| RP11-268P4.6   | -0.12 | 5.32E-01 | -0.03 | 8.73E-01 |
| RP11-370K11.1  | -0.21 | 2.89E-01 | -0.03 | 8.73E-01 |
| RP11-3B7.1     | 0.00  | 9.93E-01 | 0.03  | 8.73E-01 |
| RP11-571I18.4  | 0.11  | 5.76E-01 | -0.03 | 8.73E-01 |
| RP4-761J14.8   | -0.21 | 2.73E-01 | -0.03 | 8.73E-01 |
| RPRM           | -0.04 | 8.50E-01 | 0.03  | 8.73E-01 |
| SRSF10         | -0.04 | 8.58E-01 | -0.03 | 8.73E-01 |
| STRCP1         | -0.33 | 8.84E-02 | -0.03 | 8.73E-01 |
| TCEB1          | 0.12  | 5.58E-01 | 0.03  | 8.73E-01 |
| UNC5B-AS1      | 0.14  | 4.70E-01 | -0.03 | 8.73E-01 |
| XLOC_013424    | 0.39  | 3.79E-02 | -0.03 | 8.73E-01 |
| ZFAS1          | 0.16  | 4.04E-01 | 0.03  | 8.73E-01 |
| C1DP1          | -0.21 | 2.87E-01 | 0.03  | 8.74E-01 |
| CLASP1         | -0.14 | 4.70E-01 | -0.03 | 8.74E-01 |
| CTD-2015G9.2   | 0.11  | 5.78E-01 | 0.03  | 8.74E-01 |

|                      |       |          |       |          |
|----------------------|-------|----------|-------|----------|
| <b>CTD-2531D15.4</b> | -0.22 | 2.60E-01 | -0.03 | 8.74E-01 |
| <b>CTD-2566J3.2</b>  | -0.30 | 1.25E-01 | -0.03 | 8.74E-01 |
| <b>CYCSP40</b>       | 0.09  | 6.51E-01 | -0.03 | 8.74E-01 |
| <b>ERAL1</b>         | 0.01  | 9.69E-01 | -0.03 | 8.74E-01 |
| <b>EYA1</b>          | -0.21 | 2.79E-01 | 0.03  | 8.74E-01 |
| <b>GAS2L2</b>        | 0.05  | 7.98E-01 | -0.03 | 8.74E-01 |
| <b>LAMTOR3P2</b>     | 0.06  | 7.44E-01 | 0.03  | 8.74E-01 |
| <b>LDHD</b>          | 0.31  | 1.11E-01 | 0.03  | 8.74E-01 |
| <b>LINC00982</b>     | -0.19 | 3.28E-01 | 0.03  | 8.74E-01 |
| <b>MAPRE3</b>        | -0.18 | 3.64E-01 | 0.03  | 8.74E-01 |
| <b>MIR95</b>         | 0.04  | 8.53E-01 | 0.03  | 8.74E-01 |
| <b>PIGP</b>          | -0.17 | 3.79E-01 | 0.03  | 8.74E-01 |
| <b>PMEL</b>          | -0.27 | 1.63E-01 | -0.03 | 8.74E-01 |
| <b>PSMD12</b>        | 0.16  | 4.24E-01 | -0.03 | 8.74E-01 |
| <b>PTCD3</b>         | 0.12  | 5.41E-01 | -0.03 | 8.74E-01 |
| <b>RNU6-1016P</b>    | -0.23 | 2.32E-01 | -0.03 | 8.74E-01 |
| <b>RP11-15F12.1</b>  | 0.10  | 5.96E-01 | 0.03  | 8.74E-01 |
| <b>RP11-303E16.7</b> | 0.31  | 1.09E-01 | 0.03  | 8.74E-01 |
| <b>RP11-53B2.2</b>   | -0.14 | 4.76E-01 | 0.03  | 8.74E-01 |
| <b>RP11-567P19.1</b> | 0.09  | 6.56E-01 | -0.03 | 8.74E-01 |
| <b>RP11-72B4.2</b>   | -0.26 | 1.84E-01 | 0.03  | 8.74E-01 |
| <b>RP11-863P13.5</b> | 0.11  | 5.63E-01 | -0.03 | 8.74E-01 |
| <b>RP4-742C19.13</b> | -0.19 | 3.46E-01 | -0.03 | 8.74E-01 |
| <b>RP4-791M13.4</b>  | 0.47  | 1.23E-02 | 0.03  | 8.74E-01 |
| <b>RPA2</b>          | -0.07 | 7.42E-01 | -0.03 | 8.74E-01 |
| <b>RPL24P2</b>       | 0.01  | 9.44E-01 | 0.03  | 8.74E-01 |
| <b>RPL5P11</b>       | -0.23 | 2.32E-01 | 0.03  | 8.74E-01 |
| <b>SAP18</b>         | 0.10  | 6.16E-01 | 0.03  | 8.74E-01 |
| <b>SPHKAP</b>        | -0.11 | 5.74E-01 | 0.03  | 8.74E-01 |
| <b>TMEM126B</b>      | 0.02  | 9.17E-01 | 0.03  | 8.74E-01 |
| <b>VPS72</b>         | 0.10  | 6.07E-01 | 0.03  | 8.74E-01 |
| <b>YARS</b>          | 0.11  | 5.63E-01 | 0.03  | 8.74E-01 |
| <b>YME1L1</b>        | 0.10  | 6.05E-01 | -0.03 | 8.74E-01 |
| <b>ZCCHC18</b>       | -0.01 | 9.71E-01 | 0.03  | 8.74E-01 |
| <b>ZNF707</b>        | -0.49 | 7.87E-03 | -0.03 | 8.74E-01 |
| <b>BABAM1</b>        | -0.16 | 4.10E-01 | -0.03 | 8.75E-01 |
| <b>C6orf203</b>      | 0.32  | 9.56E-02 | -0.03 | 8.75E-01 |
| <b>CTD-2007H13.3</b> | 0.08  | 6.80E-01 | -0.03 | 8.75E-01 |
| <b>FKBP4</b>         | 0.08  | 6.68E-01 | -0.03 | 8.75E-01 |
| <b>G1115</b>         | -0.19 | 3.43E-01 | -0.03 | 8.75E-01 |
| <b>G24512</b>        | 0.06  | 7.67E-01 | -0.03 | 8.75E-01 |
| <b>G35510</b>        | 0.02  | 9.09E-01 | -0.03 | 8.75E-01 |
| <b>GTPBP4</b>        | 0.15  | 4.52E-01 | -0.03 | 8.75E-01 |
| <b>HIST1H2AE</b>     | -0.12 | 5.30E-01 | -0.03 | 8.75E-01 |
| <b>HTR1B</b>         | -0.30 | 1.20E-01 | -0.03 | 8.75E-01 |
| <b>METTL13</b>       | 0.27  | 1.61E-01 | -0.03 | 8.75E-01 |
| <b>METTL16</b>       | 0.02  | 9.36E-01 | -0.03 | 8.75E-01 |



|               |       |          |       |          |
|---------------|-------|----------|-------|----------|
| MRPL37P1      | 0.15  | 4.43E-01 | -0.03 | 8.75E-01 |
| RN7SL487P     | 0.07  | 7.30E-01 | -0.03 | 8.75E-01 |
| THA1P         | -0.12 | 5.55E-01 | -0.03 | 8.75E-01 |
| AC005077.14   | -0.41 | 2.93E-02 | 0.03  | 8.75E-01 |
| CTD-2639E6.9  | -0.43 | 2.19E-02 | 0.03  | 8.75E-01 |
| KIAA1586      | -0.11 | 5.92E-01 | 0.03  | 8.75E-01 |
| KPNB1         | 0.13  | 5.19E-01 | 0.03  | 8.75E-01 |
| LA16c-390E6.3 | 0.13  | 5.19E-01 | 0.03  | 8.75E-01 |
| LINC00964     | -0.10 | 6.08E-01 | 0.03  | 8.75E-01 |
| OFCC1         | 0.11  | 5.63E-01 | 0.03  | 8.75E-01 |
| RP11-120K19.3 | -0.27 | 1.59E-01 | 0.03  | 8.75E-01 |
| RP11-22H5.2   | -0.14 | 4.83E-01 | 0.03  | 8.75E-01 |
| RP11-287D1.4  | 0.25  | 2.06E-01 | 0.03  | 8.75E-01 |
| RP11-390D11.1 | 0.17  | 3.79E-01 | 0.03  | 8.75E-01 |
| RP11-434B12.1 | -0.30 | 1.27E-01 | 0.03  | 8.75E-01 |
| RP11-490O6.2  | -0.11 | 5.76E-01 | 0.03  | 8.75E-01 |
| RP5-1021I20.1 | 0.09  | 6.32E-01 | 0.03  | 8.75E-01 |
| RP5-858L17.1  | 0.19  | 3.44E-01 | 0.03  | 8.75E-01 |
| TBL3          | 0.22  | 2.57E-01 | 0.03  | 8.75E-01 |
| ZNF628        | -0.19 | 3.29E-01 | 0.03  | 8.75E-01 |
| AC007389.3    | -0.12 | 5.54E-01 | 0.03  | 8.76E-01 |
| AC092798.2    | -0.15 | 4.60E-01 | 0.03  | 8.76E-01 |
| AC144831.1    | -0.04 | 8.48E-01 | -0.03 | 8.76E-01 |
| ARF1          | 0.05  | 8.10E-01 | 0.03  | 8.76E-01 |
| ARF4          | 0.06  | 7.76E-01 | 0.03  | 8.76E-01 |
| ATG12         | 0.16  | 4.12E-01 | -0.03 | 8.76E-01 |
| BTBD10        | 0.16  | 4.29E-01 | -0.03 | 8.76E-01 |
| CLDN19        | -0.16 | 4.16E-01 | 0.03  | 8.76E-01 |
| CREB3L2       | -0.41 | 2.92E-02 | 0.03  | 8.76E-01 |
| CTA-228A9.4   | -0.01 | 9.48E-01 | 0.03  | 8.76E-01 |
| CTC-351M12.1  | -0.14 | 4.83E-01 | 0.03  | 8.76E-01 |
| CTD-2528A14.5 | -0.08 | 7.00E-01 | 0.03  | 8.76E-01 |
| CTPS1         | 0.29  | 1.30E-01 | 0.03  | 8.76E-01 |
| EBPL          | 0.28  | 1.53E-01 | 0.03  | 8.76E-01 |
| EDC3          | 0.09  | 6.36E-01 | 0.03  | 8.76E-01 |
| EGR2          | -0.06 | 7.70E-01 | -0.03 | 8.76E-01 |
| FADS3         | 0.13  | 5.11E-01 | -0.03 | 8.76E-01 |
| FOXO3         | -0.09 | 6.44E-01 | 0.03  | 8.76E-01 |
| FRMD6-AS1     | -0.12 | 5.54E-01 | -0.03 | 8.76E-01 |
| HIST1H3A      | -0.18 | 3.62E-01 | 0.03  | 8.76E-01 |
| HMGB1P44      | -0.19 | 3.29E-01 | 0.03  | 8.76E-01 |
| IRF4          | -0.20 | 3.13E-01 | -0.03 | 8.76E-01 |
| KIAA2012      | -0.07 | 7.35E-01 | 0.03  | 8.76E-01 |
| KRTAP1-3      | -0.08 | 6.91E-01 | 0.03  | 8.76E-01 |
| LINC00691     | -0.36 | 5.90E-02 | 0.03  | 8.76E-01 |
| LUZP2         | 0.42  | 2.51E-02 | -0.03 | 8.76E-01 |
| MIR219A2      | -0.12 | 5.42E-01 | -0.03 | 8.76E-01 |

|                      |       |          |       |          |
|----------------------|-------|----------|-------|----------|
| <b>NGLY1</b>         | 0.12  | 5.38E-01 | -0.03 | 8.76E-01 |
| <b>NPIP15</b>        | -0.09 | 6.65E-01 | 0.03  | 8.76E-01 |
| <b>NUF2</b>          | 0.17  | 3.82E-01 | 0.03  | 8.76E-01 |
| <b>RAB12</b>         | 0.48  | 1.02E-02 | 0.03  | 8.76E-01 |
| <b>RP11-1398P2.1</b> | -0.20 | 3.00E-01 | -0.03 | 8.76E-01 |
| <b>RP11-15A1.3</b>   | -0.08 | 6.97E-01 | -0.03 | 8.76E-01 |
| <b>RP11-162A23.5</b> | 0.10  | 6.08E-01 | -0.03 | 8.76E-01 |
| <b>RP11-212I21.2</b> | -0.37 | 4.98E-02 | 0.03  | 8.76E-01 |
| <b>RP11-276H19.1</b> | -0.17 | 3.96E-01 | -0.03 | 8.76E-01 |
| <b>RP11-382D12.2</b> | -0.01 | 9.64E-01 | 0.03  | 8.76E-01 |
| <b>RP11-483H20.4</b> | -0.14 | 4.67E-01 | -0.03 | 8.76E-01 |
| <b>RP11-48B14.1</b>  | 0.08  | 6.94E-01 | -0.03 | 8.76E-01 |
| <b>RP11-543P15.3</b> | -0.01 | 9.58E-01 | -0.03 | 8.76E-01 |
| <b>RP11-571F15.3</b> | -0.14 | 4.84E-01 | 0.03  | 8.76E-01 |
| <b>RP11-647O20.1</b> | -0.13 | 5.03E-01 | -0.03 | 8.76E-01 |
| <b>RP11-700F16.2</b> | 0.00  | 9.92E-01 | 0.03  | 8.76E-01 |
| <b>RP13-39P12.2</b>  | 0.06  | 7.58E-01 | 0.03  | 8.76E-01 |
| <b>RP5-884G6.2</b>   | -0.13 | 5.04E-01 | -0.03 | 8.76E-01 |
| <b>RPL39P36</b>      | -0.30 | 1.25E-01 | 0.03  | 8.76E-01 |
| <b>SETP11</b>        | -0.04 | 8.58E-01 | -0.03 | 8.76E-01 |
| <b>SF3B3</b>         | 0.20  | 3.03E-01 | 0.03  | 8.76E-01 |
| <b>TMEM183A</b>      | 0.12  | 5.37E-01 | -0.03 | 8.76E-01 |
| <b>USP9X</b>         | -0.22 | 2.62E-01 | 0.03  | 8.76E-01 |
| <b>ZSCAN22</b>       | 0.13  | 5.14E-01 | -0.03 | 8.76E-01 |
| <b>AC009506.1</b>    | -0.02 | 9.36E-01 | 0.03  | 8.77E-01 |
| <b>AGO4</b>          | -0.13 | 5.02E-01 | 0.03  | 8.77E-01 |
| <b>ALPK1</b>         | -0.05 | 8.07E-01 | 0.03  | 8.77E-01 |
| <b>AMMECR1L</b>      | 0.08  | 6.97E-01 | -0.03 | 8.77E-01 |
| <b>CSPG4P13</b>      | -0.15 | 4.60E-01 | 0.03  | 8.77E-01 |
| <b>CTA-228A9.3</b>   | -0.22 | 2.66E-01 | 0.03  | 8.77E-01 |
| <b>CTD-2044J15.1</b> | -0.07 | 7.24E-01 | -0.03 | 8.77E-01 |
| <b>D2HGDH</b>        | -0.05 | 7.92E-01 | -0.03 | 8.77E-01 |
| <b>DDX1</b>          | 0.10  | 6.04E-01 | 0.03  | 8.77E-01 |
| <b>DSTN</b>          | 0.00  | 9.96E-01 | -0.03 | 8.77E-01 |
| <b>EIF3CL</b>        | -0.11 | 5.77E-01 | 0.03  | 8.77E-01 |
| <b>EPS15L1</b>       | 0.01  | 9.53E-01 | 0.03  | 8.77E-01 |
| <b>GAPDHP59</b>      | 0.32  | 9.50E-02 | 0.03  | 8.77E-01 |
| <b>GATS</b>          | -0.30 | 1.19E-01 | 0.03  | 8.77E-01 |
| <b>GNG7</b>          | -0.35 | 7.08E-02 | -0.03 | 8.77E-01 |
| <b>GOLGA8N</b>       | -0.05 | 7.83E-01 | -0.03 | 8.77E-01 |
| <b>GPX1P1</b>        | -0.12 | 5.45E-01 | 0.03  | 8.77E-01 |
| <b>LACC1</b>         | 0.07  | 7.09E-01 | -0.03 | 8.77E-01 |
| <b>LDHB</b>          | 0.14  | 4.64E-01 | -0.03 | 8.77E-01 |
| <b>MBD4</b>          | 0.39  | 4.28E-02 | -0.03 | 8.77E-01 |
| <b>MUC6</b>          | -0.16 | 4.16E-01 | 0.03  | 8.77E-01 |
| <b>NPPA</b>          | 0.03  | 8.82E-01 | 0.03  | 8.77E-01 |
| <b>OR52B5P</b>       | -0.13 | 5.26E-01 | 0.03  | 8.77E-01 |

|                |       |          |       |          |
|----------------|-------|----------|-------|----------|
| P3H2           | 0.01  | 9.54E-01 | -0.03 | 8.77E-01 |
| PGPEP1         | 0.11  | 5.67E-01 | 0.03  | 8.77E-01 |
| PHBP15         | -0.04 | 8.28E-01 | 0.03  | 8.77E-01 |
| PHF8           | -0.02 | 9.21E-01 | 0.03  | 8.77E-01 |
| PLXDC2         | -0.01 | 9.74E-01 | -0.03 | 8.77E-01 |
| PQBP1          | 0.04  | 8.28E-01 | 0.03  | 8.77E-01 |
| PRMT7          | -0.10 | 5.98E-01 | 0.03  | 8.77E-01 |
| PXN            | 0.02  | 9.15E-01 | 0.03  | 8.77E-01 |
| RNU5A-6P       | 0.03  | 8.77E-01 | -0.03 | 8.77E-01 |
| RNU6-731P      | -0.24 | 2.18E-01 | -0.03 | 8.77E-01 |
| RP1-128M12.3   | -0.32 | 1.01E-01 | 0.03  | 8.77E-01 |
| RP11-386M24.4  | -0.09 | 6.54E-01 | -0.03 | 8.77E-01 |
| RP11-486O12.2  | -0.23 | 2.45E-01 | 0.03  | 8.77E-01 |
| RP11-492E3.2   | -0.15 | 4.61E-01 | 0.03  | 8.77E-01 |
| RP11-51F16.9   | -0.26 | 1.82E-01 | -0.03 | 8.77E-01 |
| RP11-51J9.4    | -0.11 | 5.73E-01 | -0.03 | 8.77E-01 |
| RP11-686D22.10 | 0.08  | 6.69E-01 | 0.03  | 8.77E-01 |
| RP11-8H2.1     | 0.26  | 1.80E-01 | 0.03  | 8.77E-01 |
| SEC11A         | 0.12  | 5.46E-01 | 0.03  | 8.77E-01 |
| SNORD111B      | 0.20  | 3.09E-01 | -0.03 | 8.77E-01 |
| SUZ12          | 0.18  | 3.69E-01 | 0.03  | 8.77E-01 |
| TUBA4B         | -0.43 | 2.22E-02 | 0.03  | 8.77E-01 |
| WASL           | 0.30  | 1.26E-01 | 0.03  | 8.77E-01 |
| XLOC_002996    | 0.05  | 8.10E-01 | -0.03 | 8.77E-01 |
| XLOC_011616    | -0.12 | 5.53E-01 | -0.03 | 8.77E-01 |
| BRSK1          | 0.00  | 9.98E-01 | -0.03 | 8.79E-01 |
| C16orf71       | -0.15 | 4.39E-01 | -0.03 | 8.79E-01 |
| EEF1B2P3       | -0.21 | 2.73E-01 | -0.03 | 8.79E-01 |
| FAM90A2P       | -0.37 | 4.96E-02 | -0.03 | 8.79E-01 |
| KC6            | 0.05  | 8.05E-01 | -0.03 | 8.79E-01 |
| KRT18P57       | -0.24 | 2.26E-01 | -0.03 | 8.79E-01 |
| PDE3B          | 0.06  | 7.55E-01 | -0.03 | 8.79E-01 |
| RNU6-100P      | -0.31 | 1.13E-01 | -0.03 | 8.79E-01 |
| RNU6-399P      | -0.10 | 6.29E-01 | -0.03 | 8.79E-01 |
| RP11-315D13.1  | -0.14 | 4.68E-01 | -0.03 | 8.79E-01 |
| RP11-468E2.11  | -0.02 | 9.39E-01 | -0.03 | 8.79E-01 |
| RP11-678G15.2  | 0.19  | 3.34E-01 | -0.03 | 8.79E-01 |
| RP3-389A20.5   | -0.25 | 1.98E-01 | -0.03 | 8.79E-01 |
| TNFAIP3        | -0.26 | 1.89E-01 | -0.03 | 8.79E-01 |
| TWSG1          | 0.30  | 1.20E-01 | -0.03 | 8.79E-01 |
| AC004054.1     | 0.18  | 3.58E-01 | 0.03  | 8.79E-01 |
| BOLA3          | 0.09  | 6.34E-01 | 0.03  | 8.79E-01 |
| CBX3P3         | -0.04 | 8.59E-01 | 0.03  | 8.79E-01 |
| CTD-2542C24.9  | 0.08  | 6.98E-01 | 0.03  | 8.79E-01 |
| ITK            | 0.24  | 2.27E-01 | 0.03  | 8.79E-01 |
| MIR648         | -0.19 | 3.23E-01 | 0.03  | 8.79E-01 |
| PABPC1P1       | -0.20 | 3.11E-01 | 0.03  | 8.79E-01 |

|               |       |          |       |          |
|---------------|-------|----------|-------|----------|
| PPRC1         | 0.18  | 3.49E-01 | 0.03  | 8.79E-01 |
| RP11-139K1.2  | -0.05 | 8.12E-01 | 0.03  | 8.79E-01 |
| RP11-400N13.3 | -0.02 | 9.39E-01 | 0.03  | 8.79E-01 |
| RP11-660M5.1  | 0.21  | 2.79E-01 | 0.03  | 8.79E-01 |
| RP11-782C8.7  | -0.03 | 8.86E-01 | 0.03  | 8.79E-01 |
| SCHIP1        | -0.46 | 1.27E-02 | 0.03  | 8.79E-01 |
| SLC39A1       | 0.04  | 8.45E-01 | 0.03  | 8.79E-01 |
| WIPI1         | 0.18  | 3.56E-01 | 0.03  | 8.79E-01 |
| AC079613.1    | 0.20  | 3.16E-01 | 0.03  | 8.80E-01 |
| ADCY10P1      | -0.03 | 8.77E-01 | 0.03  | 8.80E-01 |
| CARNMT1       | 0.14  | 4.65E-01 | 0.03  | 8.80E-01 |
| CELF5         | 0.33  | 9.07E-02 | -0.03 | 8.80E-01 |
| CREG2         | 0.05  | 7.86E-01 | 0.03  | 8.80E-01 |
| EMC1          | 0.25  | 1.93E-01 | -0.03 | 8.80E-01 |
| G31329        | -0.03 | 8.83E-01 | -0.03 | 8.80E-01 |
| HIST1H2BO     | 0.03  | 8.85E-01 | 0.03  | 8.80E-01 |
| HMG1P24       | 0.04  | 8.37E-01 | 0.03  | 8.80E-01 |
| LA16c-306A4.2 | -0.02 | 9.18E-01 | -0.03 | 8.80E-01 |
| LINC01220     | 0.05  | 8.10E-01 | 0.03  | 8.80E-01 |
| METTL9        | 0.36  | 5.90E-02 | 0.03  | 8.80E-01 |
| MGP           | -0.21 | 2.76E-01 | -0.03 | 8.80E-01 |
| MIR148B       | 0.10  | 6.09E-01 | -0.03 | 8.80E-01 |
| MIR4484       | -0.17 | 3.79E-01 | -0.03 | 8.80E-01 |
| MYO19         | 0.08  | 6.72E-01 | 0.03  | 8.80E-01 |
| NARS2         | 0.05  | 8.14E-01 | 0.03  | 8.80E-01 |
| NBPF3         | -0.21 | 2.85E-01 | 0.03  | 8.80E-01 |
| NEAT1         | -0.03 | 8.92E-01 | 0.03  | 8.80E-01 |
| NYAP1         | 0.02  | 9.09E-01 | 0.03  | 8.80E-01 |
| PABPC1P4      | -0.12 | 5.54E-01 | -0.03 | 8.80E-01 |
| PBOV1         | -0.12 | 5.36E-01 | -0.03 | 8.80E-01 |
| RP11-165M1.3  | -0.21 | 2.85E-01 | -0.03 | 8.80E-01 |
| RP11-17A1.3   | 0.01  | 9.67E-01 | 0.03  | 8.80E-01 |
| RP11-25C19.3  | -0.11 | 5.69E-01 | -0.03 | 8.80E-01 |
| RP11-386I14.4 | 0.07  | 7.05E-01 | -0.03 | 8.80E-01 |
| RP11-407G23.4 | 0.01  | 9.49E-01 | -0.03 | 8.80E-01 |
| RP11-715J22.3 | 0.14  | 4.86E-01 | 0.03  | 8.80E-01 |
| RP11-798L4.1  | -0.17 | 3.96E-01 | -0.03 | 8.80E-01 |
| RP13-941N14.1 | 0.34  | 7.77E-02 | -0.03 | 8.80E-01 |
| RPL27A        | 0.28  | 1.56E-01 | 0.03  | 8.80E-01 |
| RPL41         | -0.01 | 9.69E-01 | 0.03  | 8.80E-01 |
| SLC27A2       | 0.00  | 9.91E-01 | -0.03 | 8.80E-01 |
| SPIN4         | 0.40  | 3.28E-02 | 0.03  | 8.80E-01 |
| TCOF1         | -0.12 | 5.29E-01 | 0.03  | 8.80E-01 |
| WNK3          | -0.15 | 4.49E-01 | -0.03 | 8.80E-01 |
| ZDHH8P1       | -0.35 | 6.66E-02 | -0.03 | 8.80E-01 |
| ZNF784        | 0.23  | 2.33E-01 | 0.03  | 8.80E-01 |
| AC060226.1    | 0.02  | 9.01E-01 | 0.03  | 8.81E-01 |

|                       |       |          |       |          |
|-----------------------|-------|----------|-------|----------|
| <b>AIMP2</b>          | 0.10  | 6.08E-01 | 0.03  | 8.81E-01 |
| <b>AL627171.1</b>     | -0.01 | 9.44E-01 | 0.03  | 8.81E-01 |
| <b>ATP6V1H</b>        | 0.09  | 6.33E-01 | -0.03 | 8.81E-01 |
| <b>C1QTNF9</b>        | -0.14 | 4.82E-01 | 0.03  | 8.81E-01 |
| <b>C6orf15</b>        | 0.02  | 9.12E-01 | 0.03  | 8.81E-01 |
| <b>CENPF</b>          | 0.03  | 8.87E-01 | 0.03  | 8.81E-01 |
| <b>CTC-429P9.5</b>    | 0.30  | 1.15E-01 | 0.03  | 8.81E-01 |
| <b>CTD-2525I3.2</b>   | -0.26 | 1.89E-01 | -0.03 | 8.81E-01 |
| <b>DLEU2</b>          | 0.19  | 3.39E-01 | -0.03 | 8.81E-01 |
| <b>FAF2</b>           | 0.14  | 4.80E-01 | 0.03  | 8.81E-01 |
| <b>FAM228A</b>        | -0.03 | 8.63E-01 | -0.03 | 8.81E-01 |
| <b>KBTBD4</b>         | 0.10  | 6.15E-01 | 0.03  | 8.81E-01 |
| <b>ORC6</b>           | 0.25  | 1.93E-01 | -0.03 | 8.81E-01 |
| <b>POLN</b>           | 0.08  | 6.73E-01 | -0.03 | 8.81E-01 |
| <b>RNU6-37P</b>       | 0.03  | 8.87E-01 | -0.03 | 8.81E-01 |
| <b>RNY5P1</b>         | 0.02  | 9.03E-01 | 0.03  | 8.81E-01 |
| <b>RP11-117N2.2</b>   | -0.21 | 2.86E-01 | 0.03  | 8.81E-01 |
| <b>RP11-234A1.1</b>   | -0.10 | 6.12E-01 | 0.03  | 8.81E-01 |
| <b>RP11-568G11.5</b>  | -0.15 | 4.49E-01 | -0.03 | 8.81E-01 |
| <b>XLOC_000019</b>    | -0.02 | 9.06E-01 | 0.03  | 8.81E-01 |
| <b>XLOC_008986</b>    | -0.12 | 5.58E-01 | -0.03 | 8.81E-01 |
| <b>ZSCAN2</b>         | 0.05  | 7.96E-01 | 0.03  | 8.81E-01 |
| <b>ATP11A</b>         | 0.08  | 7.02E-01 | 0.03  | 8.82E-01 |
| <b>CDK16</b>          | 0.03  | 8.87E-01 | 0.03  | 8.82E-01 |
| <b>DPP7</b>           | -0.04 | 8.41E-01 | 0.03  | 8.82E-01 |
| <b>EML2</b>           | 0.01  | 9.55E-01 | 0.03  | 8.82E-01 |
| <b>EPB42</b>          | -0.01 | 9.68E-01 | 0.03  | 8.82E-01 |
| <b>KCTD9P4</b>        | -0.14 | 4.79E-01 | 0.03  | 8.82E-01 |
| <b>LINC00271</b>      | 0.15  | 4.58E-01 | 0.03  | 8.82E-01 |
| <b>RP11-302M6.5</b>   | -0.22 | 2.65E-01 | 0.03  | 8.82E-01 |
| <b>RP11-349N19.2</b>  | -0.02 | 9.16E-01 | 0.03  | 8.82E-01 |
| <b>RP11-49O14.2</b>   | 0.22  | 2.66E-01 | 0.03  | 8.82E-01 |
| <b>RP11-504I13.2</b>  | 0.11  | 5.80E-01 | 0.03  | 8.82E-01 |
| <b>RP11-886P16.10</b> | 0.03  | 8.64E-01 | 0.03  | 8.82E-01 |
| <b>RPS3AP26</b>       | -0.02 | 9.14E-01 | 0.03  | 8.82E-01 |
| <b>SERPINB8</b>       | 0.24  | 2.10E-01 | 0.03  | 8.82E-01 |
| <b>SMAD1-AS2</b>      | 0.09  | 6.60E-01 | 0.03  | 8.82E-01 |
| <b>TMEM44-AS1</b>     | -0.18 | 3.66E-01 | 0.03  | 8.82E-01 |
| <b>WDTC1</b>          | -0.04 | 8.45E-01 | 0.03  | 8.82E-01 |
| <b>CNPY3</b>          | 0.00  | 9.89E-01 | -0.03 | 8.82E-01 |
| <b>CTC-479C5.12</b>   | -0.05 | 8.11E-01 | -0.03 | 8.82E-01 |
| <b>EEF1A1P3</b>       | -0.36 | 5.74E-02 | -0.03 | 8.82E-01 |
| <b>EIF2S2P4</b>       | -0.12 | 5.54E-01 | -0.03 | 8.82E-01 |
| <b>HIST1H1B</b>       | -0.01 | 9.44E-01 | -0.03 | 8.82E-01 |
| <b>HM13-IT1</b>       | 0.02  | 9.18E-01 | -0.03 | 8.82E-01 |
| <b>IFT52</b>          | -0.06 | 7.81E-01 | -0.03 | 8.82E-01 |
| <b>MYLK</b>           | 0.06  | 7.62E-01 | -0.03 | 8.82E-01 |

|                       |       |          |       |          |
|-----------------------|-------|----------|-------|----------|
| <b>NOP56P3</b>        | 0.04  | 8.50E-01 | -0.03 | 8.82E-01 |
| <b>NOP58</b>          | 0.14  | 4.89E-01 | -0.03 | 8.82E-01 |
| <b>OSER1-AS1</b>      | 0.02  | 9.32E-01 | -0.03 | 8.82E-01 |
| <b>PSMC1P1</b>        | 0.17  | 3.90E-01 | -0.03 | 8.82E-01 |
| <b>RP11-314C9.2</b>   | -0.01 | 9.57E-01 | -0.03 | 8.82E-01 |
| <b>RP11-66N24.4</b>   | 0.29  | 1.29E-01 | -0.03 | 8.82E-01 |
| <b>SDCBP</b>          | -0.27 | 1.64E-01 | -0.03 | 8.82E-01 |
| <b>SSU72</b>          | 0.24  | 2.18E-01 | -0.03 | 8.82E-01 |
| <b>STOX2</b>          | 0.16  | 4.20E-01 | -0.03 | 8.82E-01 |
| <b>AC007009.2</b>     | -0.04 | 8.59E-01 | -0.03 | 8.83E-01 |
| <b>ADAMTS14</b>       | -0.42 | 2.63E-02 | -0.03 | 8.83E-01 |
| <b>AK4P4</b>          | -0.02 | 9.27E-01 | -0.03 | 8.83E-01 |
| <b>AP000807.1</b>     | -0.29 | 1.36E-01 | -0.03 | 8.83E-01 |
| <b>AUTS2</b>          | 0.01  | 9.60E-01 | -0.03 | 8.83E-01 |
| <b>CDC25C</b>         | 0.04  | 8.24E-01 | -0.03 | 8.83E-01 |
| <b>CDKL3</b>          | -0.19 | 3.35E-01 | -0.03 | 8.83E-01 |
| <b>CLNS1A</b>         | 0.19  | 3.34E-01 | 0.03  | 8.83E-01 |
| <b>DCTN6</b>          | 0.42  | 2.68E-02 | -0.03 | 8.83E-01 |
| <b>DCTPP1</b>         | -0.10 | 6.06E-01 | 0.03  | 8.83E-01 |
| <b>DTL</b>            | -0.01 | 9.71E-01 | -0.03 | 8.83E-01 |
| <b>DYM</b>            | 0.12  | 5.57E-01 | -0.03 | 8.83E-01 |
| <b>FAM193B</b>        | -0.12 | 5.42E-01 | 0.03  | 8.83E-01 |
| <b>FARSB</b>          | 0.26  | 1.88E-01 | 0.03  | 8.83E-01 |
| <b>FNDC3B</b>         | -0.15 | 4.49E-01 | -0.03 | 8.83E-01 |
| <b>GNA11</b>          | 0.14  | 4.66E-01 | 0.03  | 8.83E-01 |
| <b>HMGN2P15</b>       | -0.24 | 2.09E-01 | 0.03  | 8.83E-01 |
| <b>KANK1</b>          | -0.07 | 7.11E-01 | -0.03 | 8.83E-01 |
| <b>LA16c-390E6.4</b>  | -0.08 | 6.75E-01 | -0.03 | 8.83E-01 |
| <b>MCFD2</b>          | 0.32  | 1.00E-01 | -0.03 | 8.83E-01 |
| <b>MCM6</b>           | -0.01 | 9.51E-01 | 0.03  | 8.83E-01 |
| <b>NHP2</b>           | -0.02 | 9.36E-01 | -0.03 | 8.83E-01 |
| <b>OR10AB1P</b>       | -0.01 | 9.53E-01 | -0.03 | 8.83E-01 |
| <b>PDE3A</b>          | -0.25 | 2.04E-01 | 0.03  | 8.83E-01 |
| <b>RN7SKP56</b>       | -0.35 | 7.03E-02 | -0.03 | 8.83E-01 |
| <b>RNU4ATAC18P</b>    | -0.41 | 3.13E-02 | 0.03  | 8.83E-01 |
| <b>RP11-177B4.1</b>   | -0.30 | 1.20E-01 | 0.03  | 8.83E-01 |
| <b>RP11-242J7.1</b>   | -0.20 | 3.00E-01 | -0.03 | 8.83E-01 |
| <b>RP11-366L20.2</b>  | 0.11  | 5.80E-01 | 0.03  | 8.83E-01 |
| <b>RP11-399K21.11</b> | 0.10  | 6.07E-01 | -0.03 | 8.83E-01 |
| <b>RP11-482G13.1</b>  | 0.14  | 4.73E-01 | -0.03 | 8.83E-01 |
| <b>RP11-756G20.1</b>  | -0.14 | 4.74E-01 | -0.03 | 8.83E-01 |
| <b>RP3-495K2.4</b>    | -0.10 | 6.04E-01 | 0.03  | 8.83E-01 |
| <b>RP6-206I17.1</b>   | -0.28 | 1.44E-01 | 0.03  | 8.83E-01 |
| <b>SPAG7</b>          | 0.20  | 3.17E-01 | -0.03 | 8.83E-01 |
| <b>TAF2</b>           | 0.18  | 3.57E-01 | -0.03 | 8.83E-01 |
| <b>TEAD2</b>          | 0.07  | 7.37E-01 | -0.03 | 8.83E-01 |
| <b>TULP3</b>          | -0.10 | 6.08E-01 | 0.03  | 8.83E-01 |

|               |       |          |       |          |
|---------------|-------|----------|-------|----------|
| ZNF19         | -0.31 | 1.08E-01 | 0.03  | 8.83E-01 |
| ZSWIM7        | 0.16  | 4.21E-01 | -0.03 | 8.83E-01 |
| AC107021.1    | 0.31  | 1.07E-01 | -0.03 | 8.85E-01 |
| BMP2KL        | -0.31 | 1.13E-01 | 0.03  | 8.85E-01 |
| CNGB3         | -0.32 | 9.90E-02 | -0.03 | 8.85E-01 |
| CROCC         | -0.12 | 5.39E-01 | -0.03 | 8.85E-01 |
| CTC-487M23.8  | 0.22  | 2.70E-01 | -0.03 | 8.85E-01 |
| DENND6B       | -0.46 | 1.48E-02 | -0.03 | 8.85E-01 |
| DNAH12        | -0.11 | 5.63E-01 | -0.03 | 8.85E-01 |
| FAM60BP       | -0.31 | 1.06E-01 | -0.03 | 8.85E-01 |
| FAM83H        | 0.16  | 4.29E-01 | 0.03  | 8.85E-01 |
| GLIPR2        | 0.08  | 6.80E-01 | -0.03 | 8.85E-01 |
| GNB1          | 0.00  | 9.88E-01 | 0.03  | 8.85E-01 |
| KBTBD8        | 0.29  | 1.37E-01 | -0.03 | 8.85E-01 |
| LHX6          | -0.08 | 6.75E-01 | 0.03  | 8.85E-01 |
| MASTL         | 0.35  | 6.41E-02 | 0.03  | 8.85E-01 |
| MIR3676       | 0.05  | 8.15E-01 | -0.03 | 8.85E-01 |
| P2RY1         | 0.02  | 9.16E-01 | 0.03  | 8.85E-01 |
| PDXDC1        | 0.04  | 8.22E-01 | -0.03 | 8.85E-01 |
| PPP1R35       | -0.06 | 7.62E-01 | 0.03  | 8.85E-01 |
| RP11-121A8.1  | 0.29  | 1.40E-01 | -0.03 | 8.85E-01 |
| RP11-439E19.6 | -0.05 | 8.16E-01 | 0.03  | 8.85E-01 |
| RP11-631F7.1  | 0.13  | 5.18E-01 | 0.03  | 8.85E-01 |
| RP11-762H8.1  | 0.00  | 9.93E-01 | -0.03 | 8.85E-01 |
| RPL17P17      | -0.08 | 6.93E-01 | 0.03  | 8.85E-01 |
| RPS2P32       | 0.09  | 6.51E-01 | 0.03  | 8.85E-01 |
| SAMD11P1      | 0.09  | 6.58E-01 | -0.03 | 8.85E-01 |
| SLC35D3       | -0.29 | 1.29E-01 | 0.03  | 8.85E-01 |
| SNORD121A     | -0.04 | 8.40E-01 | -0.03 | 8.85E-01 |
| SPC25         | -0.07 | 7.31E-01 | 0.03  | 8.85E-01 |
| USP5          | -0.03 | 8.89E-01 | -0.03 | 8.85E-01 |
| VPRBP         | 0.03  | 8.79E-01 | 0.03  | 8.85E-01 |
| ZNF248        | -0.03 | 8.64E-01 | -0.03 | 8.85E-01 |
| AC004022.8    | 0.32  | 9.50E-02 | -0.03 | 8.86E-01 |
| AC079779.4    | 0.22  | 2.68E-01 | 0.03  | 8.86E-01 |
| C1orf147      | 0.10  | 6.26E-01 | -0.03 | 8.86E-01 |
| CAMLG         | 0.11  | 5.77E-01 | -0.03 | 8.86E-01 |
| CBX7          | -0.32 | 9.90E-02 | -0.03 | 8.86E-01 |
| CEP152        | -0.07 | 7.26E-01 | 0.03  | 8.86E-01 |
| CLUHP3        | 0.20  | 3.05E-01 | 0.03  | 8.86E-01 |
| CTA-292E10.8  | -0.18 | 3.48E-01 | -0.03 | 8.86E-01 |
| CTB-58E17.3   | -0.04 | 8.39E-01 | -0.03 | 8.86E-01 |
| CTD-2033D15.2 | -0.05 | 8.05E-01 | 0.03  | 8.86E-01 |
| EFTUD1        | -0.06 | 7.47E-01 | 0.03  | 8.86E-01 |
| ENO2          | -0.23 | 2.33E-01 | -0.03 | 8.86E-01 |
| FAM47E        | -0.14 | 4.79E-01 | -0.03 | 8.86E-01 |
| INCA1         | 0.07  | 7.21E-01 | -0.03 | 8.86E-01 |

|                |       |          |       |          |
|----------------|-------|----------|-------|----------|
| LA16c-312E8.4  | 0.07  | 7.41E-01 | 0.03  | 8.86E-01 |
| LANCL1-AS1     | 0.20  | 3.02E-01 | -0.03 | 8.86E-01 |
| LINC01229      | -0.20 | 3.19E-01 | -0.03 | 8.86E-01 |
| MTND1P21       | 0.18  | 3.63E-01 | 0.03  | 8.86E-01 |
| NKAPL          | -0.07 | 7.06E-01 | 0.03  | 8.86E-01 |
| NOL4           | 0.13  | 5.00E-01 | -0.03 | 8.86E-01 |
| PKD2           | -0.09 | 6.60E-01 | 0.03  | 8.86E-01 |
| PPDPF          | -0.16 | 4.21E-01 | -0.03 | 8.86E-01 |
| PRADC1P1       | -0.21 | 2.82E-01 | 0.03  | 8.86E-01 |
| PTGES3         | 0.10  | 5.97E-01 | 0.03  | 8.86E-01 |
| PZP            | 0.13  | 5.25E-01 | -0.03 | 8.86E-01 |
| RABL2B         | -0.18 | 3.69E-01 | 0.03  | 8.86E-01 |
| RMDN3          | -0.04 | 8.48E-01 | -0.03 | 8.86E-01 |
| RNF34          | 0.25  | 2.06E-01 | 0.03  | 8.86E-01 |
| RP11-166B2.7   | 0.15  | 4.31E-01 | 0.03  | 8.86E-01 |
| RP11-193I22.2  | 0.26  | 1.85E-01 | -0.03 | 8.86E-01 |
| RP11-259O18.5  | 0.35  | 6.80E-02 | -0.03 | 8.86E-01 |
| RP11-380G5.2   | 0.22  | 2.66E-01 | -0.03 | 8.86E-01 |
| RP11-380G5.3   | -0.16 | 4.06E-01 | -0.03 | 8.86E-01 |
| RP11-451F14.1  | -0.18 | 3.54E-01 | 0.03  | 8.86E-01 |
| RP11-727A23.10 | -0.08 | 6.99E-01 | 0.03  | 8.86E-01 |
| RP11-834C11.10 | -0.07 | 7.30E-01 | 0.03  | 8.86E-01 |
| RP4-539M6.20   | 0.03  | 8.67E-01 | -0.03 | 8.86E-01 |
| RP5-856G1.2    | -0.11 | 5.79E-01 | 0.03  | 8.86E-01 |
| TTK            | 0.11  | 5.75E-01 | -0.03 | 8.86E-01 |
| ZNF124         | 0.03  | 8.97E-01 | -0.03 | 8.86E-01 |
| AP000640.2     | 0.17  | 3.97E-01 | 0.03  | 8.87E-01 |
| BRD7P2         | -0.03 | 8.67E-01 | -0.03 | 8.87E-01 |
| CD3EAP         | 0.34  | 8.13E-02 | -0.03 | 8.87E-01 |
| CDC45          | 0.00  | 9.98E-01 | 0.03  | 8.87E-01 |
| CEP83-AS1      | 0.18  | 3.55E-01 | 0.03  | 8.87E-01 |
| CTD-2066L21.3  | -0.14 | 4.80E-01 | 0.03  | 8.87E-01 |
| CTD-2555C10.3  | 0.13  | 4.97E-01 | -0.03 | 8.87E-01 |
| CXCL6          | 0.16  | 4.24E-01 | -0.03 | 8.87E-01 |
| CXorf65        | 0.08  | 6.74E-01 | -0.03 | 8.87E-01 |
| EXOSC5         | 0.00  | 9.93E-01 | -0.03 | 8.87E-01 |
| GPR35          | 0.14  | 4.81E-01 | 0.03  | 8.87E-01 |
| HIST1H2BM      | -0.06 | 7.71E-01 | 0.03  | 8.87E-01 |
| KTI12          | 0.21  | 2.91E-01 | -0.03 | 8.87E-01 |
| MYEOV2         | 0.04  | 8.53E-01 | 0.03  | 8.87E-01 |
| NCOA6          | 0.00  | 9.93E-01 | -0.03 | 8.87E-01 |
| NLE1           | 0.26  | 1.85E-01 | 0.03  | 8.87E-01 |
| OR7M1P         | -0.15 | 4.44E-01 | 0.03  | 8.87E-01 |
| PPIHP1         | -0.53 | 3.89E-03 | 0.03  | 8.87E-01 |
| PSMB3          | 0.05  | 7.83E-01 | -0.03 | 8.87E-01 |
| RALY           | -0.07 | 7.09E-01 | 0.03  | 8.87E-01 |
| RIOK2          | 0.12  | 5.59E-01 | -0.03 | 8.87E-01 |



|                      |       |          |       |          |
|----------------------|-------|----------|-------|----------|
| <b>RN7SL146P</b>     | 0.15  | 4.42E-01 | -0.03 | 8.87E-01 |
| <b>RNU6-619P</b>     | -0.02 | 9.03E-01 | 0.03  | 8.87E-01 |
| <b>RP1-319M7.2</b>   | 0.18  | 3.70E-01 | 0.03  | 8.87E-01 |
| <b>RP11-426C22.5</b> | -0.06 | 7.44E-01 | -0.03 | 8.87E-01 |
| <b>RP11-452G18.1</b> | 0.16  | 4.21E-01 | 0.03  | 8.87E-01 |
| <b>RP11-454F8.3</b>  | 0.00  | 9.85E-01 | -0.03 | 8.87E-01 |
| <b>RP11-730B22.1</b> | -0.06 | 7.71E-01 | -0.03 | 8.87E-01 |
| <b>RPSAP47</b>       | -0.06 | 7.77E-01 | 0.03  | 8.87E-01 |
| <b>SNORD116-6</b>    | -0.01 | 9.77E-01 | 0.03  | 8.87E-01 |
| <b>WHSC1</b>         | -0.14 | 4.66E-01 | -0.03 | 8.87E-01 |
| <b>ZNF777</b>        | -0.16 | 4.21E-01 | -0.03 | 8.87E-01 |
| <b>ABALON</b>        | -0.16 | 4.27E-01 | -0.03 | 8.88E-01 |
| <b>AC006116.20</b>   | -0.25 | 2.06E-01 | -0.03 | 8.88E-01 |
| <b>AL844165.1</b>    | 0.02  | 9.28E-01 | 0.03  | 8.88E-01 |
| <b>ANGPTL3</b>       | 0.00  | 9.92E-01 | -0.03 | 8.88E-01 |
| <b>ANKLE2</b>        | 0.00  | 9.87E-01 | -0.03 | 8.88E-01 |
| <b>ANKRD13A</b>      | 0.11  | 5.71E-01 | 0.03  | 8.88E-01 |
| <b>BOLA3-AS1</b>     | 0.04  | 8.59E-01 | 0.03  | 8.88E-01 |
| <b>C1orf210</b>      | 0.01  | 9.77E-01 | 0.03  | 8.88E-01 |
| <b>C21orf2</b>       | -0.23 | 2.29E-01 | -0.03 | 8.88E-01 |
| <b>CALR4P</b>        | -0.05 | 7.89E-01 | -0.03 | 8.88E-01 |
| <b>DEAR</b>          | -0.20 | 3.02E-01 | 0.03  | 8.88E-01 |
| <b>FAM173A</b>       | 0.09  | 6.46E-01 | 0.03  | 8.88E-01 |
| <b>FBXL5</b>         | -0.12 | 5.38E-01 | -0.03 | 8.88E-01 |
| <b>G19165</b>        | 0.22  | 2.53E-01 | -0.03 | 8.88E-01 |
| <b>G2450</b>         | -0.17 | 3.78E-01 | -0.03 | 8.88E-01 |
| <b>GIGYF1</b>        | -0.15 | 4.37E-01 | 0.03  | 8.88E-01 |
| <b>GK</b>            | 0.31  | 1.05E-01 | -0.03 | 8.88E-01 |
| <b>HRAT92</b>        | 0.08  | 7.02E-01 | 0.03  | 8.88E-01 |
| <b>IPO9-AS1</b>      | 0.01  | 9.79E-01 | 0.03  | 8.88E-01 |
| <b>KDF1</b>          | 0.08  | 7.03E-01 | 0.03  | 8.88E-01 |
| <b>LINC00441</b>     | 0.05  | 8.04E-01 | -0.03 | 8.88E-01 |
| <b>LINC00843</b>     | 0.09  | 6.50E-01 | -0.03 | 8.88E-01 |
| <b>LINC01152</b>     | 0.11  | 5.88E-01 | 0.03  | 8.88E-01 |
| <b>MCM2</b>          | 0.06  | 7.79E-01 | 0.03  | 8.88E-01 |
| <b>MYBPHL</b>        | -0.34 | 7.72E-02 | -0.03 | 8.88E-01 |
| <b>NCS1</b>          | 0.02  | 9.17E-01 | -0.03 | 8.88E-01 |
| <b>NOSTRIN</b>       | -0.26 | 1.86E-01 | 0.03  | 8.88E-01 |
| <b>RHOA</b>          | 0.19  | 3.44E-01 | -0.03 | 8.88E-01 |
| <b>RN7SKP210</b>     | -0.02 | 9.02E-01 | 0.03  | 8.88E-01 |
| <b>RN7SL629P</b>     | 0.02  | 9.35E-01 | 0.03  | 8.88E-01 |
| <b>RN7SL672P</b>     | -0.16 | 4.11E-01 | -0.03 | 8.88E-01 |
| <b>RP11-102L12.2</b> | -0.02 | 9.21E-01 | 0.03  | 8.88E-01 |
| <b>RP11-190A12.8</b> | 0.21  | 2.93E-01 | -0.03 | 8.88E-01 |
| <b>RP11-231C14.7</b> | -0.01 | 9.61E-01 | 0.03  | 8.88E-01 |
| <b>RP11-231P20.5</b> | 0.00  | 9.91E-01 | -0.03 | 8.88E-01 |
| <b>RP11-296O14.2</b> | -0.25 | 2.05E-01 | 0.03  | 8.88E-01 |

|               |       |          |       |          |
|---------------|-------|----------|-------|----------|
| RP11-354E23.4 | -0.24 | 2.11E-01 | -0.03 | 8.88E-01 |
| RP11-652G5.1  | -0.12 | 5.50E-01 | 0.03  | 8.88E-01 |
| RP11-713C5.1  | -0.27 | 1.62E-01 | -0.03 | 8.88E-01 |
| RP4-813D12.3  | 0.23  | 2.32E-01 | -0.03 | 8.88E-01 |
| RPL32P1       | -0.30 | 1.16E-01 | 0.03  | 8.88E-01 |
| SEMA4F        | -0.24 | 2.23E-01 | 0.03  | 8.88E-01 |
| SLC10A1       | 0.21  | 2.79E-01 | -0.03 | 8.88E-01 |
| SNORD20       | 0.16  | 4.23E-01 | 0.03  | 8.88E-01 |
| SNORD88       | 0.04  | 8.36E-01 | 0.03  | 8.88E-01 |
| TIMELESS      | 0.06  | 7.44E-01 | 0.03  | 8.88E-01 |
| XLOC_007998   | -0.09 | 6.36E-01 | -0.03 | 8.88E-01 |
| XLOC_013496   | -0.16 | 4.08E-01 | -0.03 | 8.88E-01 |
| AC063932.1    | 0.00  | 9.96E-01 | -0.03 | 8.89E-01 |
| AC104695.4    | 0.07  | 7.15E-01 | 0.03  | 8.89E-01 |
| AC133644.2    | 0.06  | 7.78E-01 | 0.03  | 8.89E-01 |
| ANKRD17       | -0.07 | 7.18E-01 | 0.03  | 8.89E-01 |
| BMPER         | 0.41  | 2.85E-02 | -0.03 | 8.89E-01 |
| CFAP58        | 0.06  | 7.59E-01 | -0.03 | 8.89E-01 |
| CNPY2         | 0.57  | 1.60E-03 | -0.03 | 8.89E-01 |
| CRISPLD2      | 0.07  | 7.05E-01 | 0.03  | 8.89E-01 |
| DEAF1         | 0.05  | 7.85E-01 | 0.03  | 8.89E-01 |
| E2F3          | 0.08  | 6.87E-01 | -0.03 | 8.89E-01 |
| EIF4E2        | 0.00  | 9.87E-01 | 0.03  | 8.89E-01 |
| FGF9          | -0.11 | 5.60E-01 | -0.03 | 8.89E-01 |
| G22769        | 0.19  | 3.42E-01 | 0.03  | 8.89E-01 |
| G31873        | -0.05 | 7.86E-01 | -0.03 | 8.89E-01 |
| G41235        | 0.04  | 8.40E-01 | 0.03  | 8.89E-01 |
| JPH2          | 0.13  | 5.08E-01 | -0.03 | 8.89E-01 |
| KCNQ1         | 0.14  | 4.69E-01 | 0.03  | 8.89E-01 |
| LINC00987     | 0.20  | 3.13E-01 | 0.03  | 8.89E-01 |
| PFDN6         | 0.13  | 5.10E-01 | 0.03  | 8.89E-01 |
| POLE          | -0.29 | 1.40E-01 | -0.03 | 8.89E-01 |
| PRSS48        | -0.19 | 3.34E-01 | 0.03  | 8.89E-01 |
| RN7SL336P     | 0.05  | 8.03E-01 | -0.03 | 8.89E-01 |
| RNU7-11P      | 0.01  | 9.48E-01 | 0.03  | 8.89E-01 |
| RP11-1082L8.4 | 0.13  | 5.03E-01 | -0.03 | 8.89E-01 |
| RP11-284H18.1 | -0.20 | 3.15E-01 | -0.03 | 8.89E-01 |
| RP11-416I2.1  | -0.06 | 7.52E-01 | 0.03  | 8.89E-01 |
| RP11-666A20.4 | 0.18  | 3.56E-01 | -0.03 | 8.89E-01 |
| RP11-699C17.1 | 0.28  | 1.55E-01 | 0.03  | 8.89E-01 |
| RP11-758H9.2  | -0.27 | 1.60E-01 | -0.03 | 8.89E-01 |
| RP4-682C21.2  | -0.18 | 3.65E-01 | -0.03 | 8.89E-01 |
| RP4-778K6.1   | -0.22 | 2.56E-01 | 0.03  | 8.89E-01 |
| SHOX2         | 0.01  | 9.59E-01 | -0.03 | 8.89E-01 |
| SNAP91        | -0.07 | 7.05E-01 | 0.03  | 8.89E-01 |
| SRMP2         | -0.43 | 2.34E-02 | -0.03 | 8.89E-01 |
| STRADB        | -0.29 | 1.35E-01 | 0.03  | 8.89E-01 |

|                  |       |          |       |          |
|------------------|-------|----------|-------|----------|
| TAC4             | -0.05 | 8.00E-01 | -0.03 | 8.89E-01 |
| TEAD4            | -0.19 | 3.22E-01 | -0.03 | 8.89E-01 |
| THYN1            | 0.06  | 7.47E-01 | 0.03  | 8.89E-01 |
| TMEM261          | 0.06  | 7.53E-01 | 0.03  | 8.89E-01 |
| AC007228.9       | 0.21  | 2.85E-01 | 0.03  | 8.91E-01 |
| AGAP5            | -0.07 | 7.22E-01 | 0.03  | 8.91E-01 |
| ANKRD26          | -0.33 | 8.64E-02 | -0.03 | 8.91E-01 |
| BAZ1B            | 0.09  | 6.48E-01 | 0.03  | 8.91E-01 |
| BEST4            | -0.08 | 6.76E-01 | -0.03 | 8.91E-01 |
| C2CD4A           | 0.04  | 8.49E-01 | 0.03  | 8.91E-01 |
| C8orf44          | 0.18  | 3.71E-01 | 0.03  | 8.91E-01 |
| CCT5             | 0.21  | 2.93E-01 | 0.03  | 8.91E-01 |
| CLEC16A          | 0.06  | 7.66E-01 | 0.03  | 8.91E-01 |
| CMB9-55F22.1     | -0.02 | 9.22E-01 | -0.03 | 8.91E-01 |
| CPLX2            | -0.02 | 9.08E-01 | -0.03 | 8.91E-01 |
| EIF4A1           | -0.11 | 5.86E-01 | -0.03 | 8.91E-01 |
| FAM151A          | 0.00  | 1.00E+00 | -0.03 | 8.91E-01 |
| KLRD1            | 0.03  | 8.97E-01 | -0.03 | 8.91E-01 |
| MTMR9LP          | -0.23 | 2.41E-01 | -0.03 | 8.91E-01 |
| NTM-AS1          | -0.13 | 5.15E-01 | 0.03  | 8.91E-01 |
| POLK             | -0.08 | 6.75E-01 | -0.03 | 8.91E-01 |
| PSPHP1           | -0.42 | 2.71E-02 | 0.03  | 8.91E-01 |
| RILP             | -0.09 | 6.57E-01 | -0.03 | 8.91E-01 |
| RNU6-1283P       | -0.01 | 9.55E-01 | -0.03 | 8.91E-01 |
| RP11-235E17.6    | 0.05  | 7.87E-01 | 0.03  | 8.91E-01 |
| RP11-318A15.8    | -0.04 | 8.48E-01 | -0.03 | 8.91E-01 |
| RP11-524D16__A.: | -0.14 | 4.73E-01 | -0.03 | 8.91E-01 |
| RP11-672A2.4     | -0.20 | 3.01E-01 | 0.03  | 8.91E-01 |
| RP11-82L18.2     | 0.06  | 7.45E-01 | 0.03  | 8.91E-01 |
| RP3-500L14.2     | -0.32 | 9.42E-02 | -0.03 | 8.91E-01 |
| RPL23AP63        | -0.10 | 6.31E-01 | 0.03  | 8.91E-01 |
| SLC9A4           | 0.32  | 9.84E-02 | 0.03  | 8.91E-01 |
| TMEM211          | -0.12 | 5.38E-01 | -0.03 | 8.91E-01 |
| TNFSF18          | 0.16  | 4.16E-01 | 0.03  | 8.91E-01 |
| TTC9B            | 0.14  | 4.72E-01 | 0.03  | 8.91E-01 |
| XLOC_013940      | -0.18 | 3.55E-01 | -0.03 | 8.91E-01 |
| ZNF674           | 0.27  | 1.59E-01 | 0.03  | 8.91E-01 |
| ABCC6            | -0.24 | 2.21E-01 | -0.03 | 8.92E-01 |
| AC009495.4       | 0.02  | 9.09E-01 | 0.03  | 8.92E-01 |
| ACTN3            | -0.28 | 1.44E-01 | -0.03 | 8.92E-01 |
| BRMS1            | 0.00  | 9.85E-01 | 0.03  | 8.92E-01 |
| C21orf62         | -0.13 | 4.95E-01 | 0.03  | 8.92E-01 |
| CFL1             | 0.04  | 8.30E-01 | 0.03  | 8.92E-01 |
| CTD-3162L10.3    | -0.23 | 2.47E-01 | -0.03 | 8.92E-01 |
| DNAJA1           | 0.10  | 6.19E-01 | 0.03  | 8.92E-01 |
| DPT              | -0.17 | 3.97E-01 | -0.03 | 8.92E-01 |
| ECD              | 0.12  | 5.56E-01 | 0.03  | 8.92E-01 |

|                      |       |          |       |          |
|----------------------|-------|----------|-------|----------|
| <b>HNRNPA1P48</b>    | -0.01 | 9.71E-01 | 0.03  | 8.92E-01 |
| <b>IMP3</b>          | 0.14  | 4.89E-01 | -0.03 | 8.92E-01 |
| <b>KRT8P26</b>       | 0.05  | 7.95E-01 | 0.03  | 8.92E-01 |
| <b>LINC01128</b>     | -0.13 | 5.19E-01 | 0.03  | 8.92E-01 |
| <b>MEGF10</b>        | 0.15  | 4.32E-01 | 0.03  | 8.92E-01 |
| <b>MIR4639</b>       | -0.10 | 5.96E-01 | -0.03 | 8.92E-01 |
| <b>PLAA</b>          | 0.20  | 2.98E-01 | 0.03  | 8.92E-01 |
| <b>PLEKHS1</b>       | -0.02 | 9.36E-01 | -0.03 | 8.92E-01 |
| <b>RGS4</b>          | -0.14 | 4.79E-01 | 0.03  | 8.92E-01 |
| <b>RP11-150C16.1</b> | -0.01 | 9.60E-01 | 0.03  | 8.92E-01 |
| <b>RP11-370A5.1</b>  | -0.37 | 5.31E-02 | -0.03 | 8.92E-01 |
| <b>RP11-506H20.2</b> | -0.21 | 2.85E-01 | 0.03  | 8.92E-01 |
| <b>RP4-592A1.2</b>   | -0.09 | 6.52E-01 | 0.03  | 8.92E-01 |
| <b>RP5-1057J7.7</b>  | -0.01 | 9.56E-01 | 0.03  | 8.92E-01 |
| <b>RP5-1121H13.4</b> | -0.10 | 6.21E-01 | 0.03  | 8.92E-01 |
| <b>RPL12P31</b>      | 0.14  | 4.77E-01 | -0.03 | 8.92E-01 |
| <b>RRP1</b>          | 0.26  | 1.78E-01 | -0.03 | 8.92E-01 |
| <b>SCYL3</b>         | -0.10 | 6.16E-01 | 0.03  | 8.92E-01 |
| <b>SMAP2</b>         | 0.08  | 6.93E-01 | 0.03  | 8.92E-01 |
| <b>SPIRE2</b>        | -0.18 | 3.67E-01 | -0.03 | 8.92E-01 |
| <b>STEAP1</b>        | -0.18 | 3.46E-01 | 0.03  | 8.92E-01 |
| <b>TBX18</b>         | -0.22 | 2.51E-01 | -0.03 | 8.92E-01 |
| <b>UBE3C</b>         | 0.17  | 3.92E-01 | 0.03  | 8.92E-01 |
| <b>VSTM5</b>         | -0.07 | 7.15E-01 | -0.03 | 8.92E-01 |
| <b>YTHDF3-AS1</b>    | -0.20 | 3.20E-01 | 0.03  | 8.92E-01 |
| <b>C16orf86</b>      | -0.06 | 7.67E-01 | 0.03  | 8.93E-01 |
| <b>CSAD</b>          | -0.08 | 6.69E-01 | 0.03  | 8.93E-01 |
| <b>FAM210A</b>       | 0.17  | 3.76E-01 | 0.03  | 8.93E-01 |
| <b>GIGYF2</b>        | 0.01  | 9.45E-01 | 0.03  | 8.93E-01 |
| <b>GPR137B</b>       | 0.24  | 2.09E-01 | 0.03  | 8.93E-01 |
| <b>IGHM</b>          | 0.31  | 1.14E-01 | 0.03  | 8.93E-01 |
| <b>PARD6B</b>        | 0.17  | 3.82E-01 | 0.03  | 8.93E-01 |
| <b>PTPN2</b>         | 0.10  | 6.17E-01 | 0.03  | 8.93E-01 |
| <b>RP11-104G3.7</b>  | -0.35 | 6.59E-02 | 0.03  | 8.93E-01 |
| <b>RP11-203M5.2</b>  | 0.01  | 9.69E-01 | 0.03  | 8.93E-01 |
| <b>RP11-680F8.4</b>  | -0.12 | 5.38E-01 | 0.03  | 8.93E-01 |
| <b>RP11-95G17.2</b>  | 0.15  | 4.39E-01 | 0.03  | 8.93E-01 |
| <b>TPX2</b>          | -0.05 | 8.00E-01 | 0.03  | 8.93E-01 |
| <b>USP17L1</b>       | 0.40  | 3.45E-02 | 0.03  | 8.93E-01 |
| <b>ZNF641</b>        | 0.31  | 1.05E-01 | 0.03  | 8.93E-01 |
| <b>CCDC28A</b>       | -0.14 | 4.72E-01 | -0.03 | 8.93E-01 |
| <b>DLX6-AS1</b>      | -0.14 | 4.92E-01 | -0.03 | 8.93E-01 |
| <b>ENTPD4</b>        | -0.10 | 5.97E-01 | -0.03 | 8.93E-01 |
| <b>FAM83C</b>        | 0.04  | 8.54E-01 | -0.03 | 8.93E-01 |
| <b>G26709</b>        | -0.10 | 6.29E-01 | -0.03 | 8.93E-01 |
| <b>GABPB1</b>        | 0.04  | 8.35E-01 | -0.03 | 8.93E-01 |
| <b>GRM6</b>          | 0.12  | 5.46E-01 | -0.03 | 8.93E-01 |

|                |       |          |       |          |
|----------------|-------|----------|-------|----------|
| GTF2A2         | 0.08  | 6.84E-01 | -0.03 | 8.93E-01 |
| HAUS3          | 0.01  | 9.68E-01 | -0.03 | 8.93E-01 |
| MPHOSPH10      | 0.12  | 5.43E-01 | -0.03 | 8.93E-01 |
| MPL            | -0.11 | 5.93E-01 | -0.03 | 8.93E-01 |
| MRPS34         | 0.09  | 6.36E-01 | -0.03 | 8.93E-01 |
| RN7SL16P       | -0.49 | 8.44E-03 | -0.03 | 8.93E-01 |
| RNU6-301P      | 0.03  | 8.70E-01 | -0.03 | 8.93E-01 |
| RP11-1174L13.2 | 0.10  | 6.09E-01 | -0.03 | 8.93E-01 |
| RP11-180M15.7  | -0.01 | 9.60E-01 | -0.03 | 8.93E-01 |
| RP11-325K4.2   | -0.22 | 2.59E-01 | -0.03 | 8.93E-01 |
| RP11-351I21.11 | -0.21 | 2.73E-01 | -0.03 | 8.93E-01 |
| SALRNA2        | -0.05 | 8.03E-01 | -0.03 | 8.93E-01 |
| SFPQ           | -0.08 | 7.00E-01 | -0.03 | 8.93E-01 |
| SRP9           | 0.04  | 8.48E-01 | -0.03 | 8.93E-01 |
| TLE4           | 0.40  | 3.49E-02 | -0.03 | 8.93E-01 |
| AVIL           | 0.12  | 5.45E-01 | 0.03  | 8.94E-01 |
| C1QTNF9B       | -0.26 | 1.74E-01 | -0.03 | 8.94E-01 |
| CTC-806A22.1   | 0.27  | 1.73E-01 | -0.03 | 8.94E-01 |
| CTD-2062A1.2   | 0.16  | 4.12E-01 | -0.03 | 8.94E-01 |
| CTD-2192J16.15 | 0.38  | 4.90E-02 | -0.03 | 8.94E-01 |
| CTD-2210P15.3  | 0.23  | 2.30E-01 | -0.03 | 8.94E-01 |
| CTD-2506P8.6   | 0.07  | 7.23E-01 | 0.03  | 8.94E-01 |
| DGCR8          | 0.04  | 8.41E-01 | 0.03  | 8.94E-01 |
| DPRXP4         | -0.27 | 1.66E-01 | -0.03 | 8.94E-01 |
| GAPDHP27       | -0.20 | 3.06E-01 | -0.03 | 8.94E-01 |
| GLIPR1         | 0.13  | 5.12E-01 | -0.03 | 8.94E-01 |
| HADHA          | -0.02 | 9.29E-01 | 0.03  | 8.94E-01 |
| KCNC4          | 0.13  | 5.14E-01 | -0.03 | 8.94E-01 |
| KCTD9P1        | 0.20  | 3.13E-01 | 0.03  | 8.94E-01 |
| KRTAP5-10      | -0.16 | 4.29E-01 | -0.03 | 8.94E-01 |
| NRTN           | -0.05 | 7.96E-01 | -0.03 | 8.94E-01 |
| PCDHB13        | 0.08  | 6.87E-01 | 0.03  | 8.94E-01 |
| PPIAP2         | -0.06 | 7.79E-01 | -0.03 | 8.94E-01 |
| PRR11          | 0.19  | 3.29E-01 | 0.03  | 8.94E-01 |
| PTPRJ-AS1      | -0.01 | 9.67E-01 | -0.03 | 8.94E-01 |
| RAB33A         | 0.01  | 9.64E-01 | -0.03 | 8.94E-01 |
| RNASEH2C       | -0.10 | 6.19E-01 | -0.03 | 8.94E-01 |
| RP11-109L13.1  | -0.24 | 2.11E-01 | 0.03  | 8.94E-01 |
| RP11-174O3.1   | -0.22 | 2.58E-01 | -0.03 | 8.94E-01 |
| RP11-274B21.5  | -0.45 | 1.66E-02 | 0.03  | 8.94E-01 |
| RP11-369K16.1  | -0.24 | 2.12E-01 | -0.03 | 8.94E-01 |
| RP11-758N13.3  | -0.33 | 8.53E-02 | 0.03  | 8.94E-01 |
| RP11-977G19.5  | -0.30 | 1.27E-01 | -0.03 | 8.94E-01 |
| RP4-794H19.1   | 0.08  | 6.85E-01 | -0.03 | 8.94E-01 |
| RPL29P11       | -0.19 | 3.29E-01 | -0.03 | 8.94E-01 |
| RPLP1P6        | -0.11 | 5.83E-01 | -0.03 | 8.94E-01 |
| RPS2P28        | 0.35  | 6.39E-02 | -0.03 | 8.94E-01 |

|               |       |          |       |          |
|---------------|-------|----------|-------|----------|
| RTN1          | 0.27  | 1.63E-01 | 0.03  | 8.94E-01 |
| TBC1D29       | 0.29  | 1.28E-01 | -0.03 | 8.94E-01 |
| TEX9          | 0.05  | 8.14E-01 | 0.03  | 8.94E-01 |
| TRAJ10        | 0.07  | 7.17E-01 | 0.03  | 8.94E-01 |
| TRAT1         | -0.04 | 8.25E-01 | 0.03  | 8.94E-01 |
| VPS26A        | 0.09  | 6.67E-01 | -0.03 | 8.94E-01 |
| snoU2-30      | -0.17 | 3.83E-01 | -0.03 | 8.94E-01 |
| AC006160.5    | 0.10  | 6.29E-01 | 0.03  | 8.95E-01 |
| CFAP157       | -0.02 | 9.18E-01 | 0.03  | 8.95E-01 |
| CTD-3010D24.3 | 0.01  | 9.67E-01 | 0.03  | 8.95E-01 |
| FBL           | -0.09 | 6.51E-01 | 0.03  | 8.95E-01 |
| G38112        | 0.07  | 7.41E-01 | -0.03 | 8.95E-01 |
| GCNT2         | -0.18 | 3.57E-01 | 0.03  | 8.95E-01 |
| HMGA1P5       | 0.12  | 5.36E-01 | 0.03  | 8.95E-01 |
| HSPE1P3       | 0.15  | 4.36E-01 | -0.03 | 8.95E-01 |
| KIAA1715      | 0.16  | 4.26E-01 | -0.03 | 8.95E-01 |
| MED28P1       | -0.10 | 6.00E-01 | 0.03  | 8.95E-01 |
| MIR597        | -0.26 | 1.85E-01 | -0.03 | 8.95E-01 |
| MKKS          | 0.14  | 4.79E-01 | 0.03  | 8.95E-01 |
| NAPA-AS1      | -0.20 | 3.17E-01 | 0.03  | 8.95E-01 |
| P4HA3         | -0.25 | 1.92E-01 | -0.03 | 8.95E-01 |
| PEX3          | 0.14  | 4.65E-01 | 0.03  | 8.95E-01 |
| PHACTR2P1     | -0.11 | 5.66E-01 | -0.03 | 8.95E-01 |
| RAB21         | 0.12  | 5.50E-01 | 0.03  | 8.95E-01 |
| RAB42         | -0.20 | 3.01E-01 | 0.03  | 8.95E-01 |
| RNU6-402P     | -0.03 | 8.85E-01 | -0.03 | 8.95E-01 |
| RP11-224O19.5 | -0.14 | 4.78E-01 | 0.03  | 8.95E-01 |
| RP11-295M3.2  | -0.10 | 6.20E-01 | 0.03  | 8.95E-01 |
| RP11-31F19.1  | 0.06  | 7.66E-01 | 0.03  | 8.95E-01 |
| RP11-374P20.4 | -0.16 | 4.04E-01 | 0.03  | 8.95E-01 |
| RP11-936I5.1  | 0.14  | 4.74E-01 | 0.03  | 8.95E-01 |
| RPS26P52      | 0.27  | 1.67E-01 | -0.03 | 8.95E-01 |
| SASH1         | 0.14  | 4.89E-01 | 0.03  | 8.95E-01 |
| SLC2A1        | 0.06  | 7.54E-01 | 0.03  | 8.95E-01 |
| TINAGL1       | -0.25 | 2.07E-01 | -0.03 | 8.95E-01 |
| TMPRSS15      | 0.03  | 8.79E-01 | 0.03  | 8.95E-01 |
| VPS35         | 0.02  | 9.18E-01 | 0.03  | 8.95E-01 |
| ZNF20         | 0.09  | 6.32E-01 | 0.03  | 8.95E-01 |
| CSNK1A1       | 0.27  | 1.72E-01 | 0.03  | 8.97E-01 |
| DNM1P51       | -0.37 | 5.31E-02 | 0.03  | 8.97E-01 |
| EIF1AD        | 0.25  | 1.95E-01 | 0.03  | 8.97E-01 |
| EMBP1         | -0.13 | 4.96E-01 | 0.03  | 8.97E-01 |
| HSPA4         | 0.17  | 4.01E-01 | 0.03  | 8.97E-01 |
| KRTAP29-1     | -0.08 | 6.87E-01 | 0.03  | 8.97E-01 |
| KRTAP5-3      | -0.06 | 7.58E-01 | 0.03  | 8.97E-01 |
| LMNB1         | 0.18  | 3.71E-01 | 0.03  | 8.97E-01 |
| NDUFS3        | -0.02 | 9.26E-01 | 0.03  | 8.97E-01 |

|                |       |          |       |          |
|----------------|-------|----------|-------|----------|
| PCDH18         | -0.14 | 4.80E-01 | 0.03  | 8.97E-01 |
| PSMD7          | 0.04  | 8.56E-01 | 0.03  | 8.97E-01 |
| RP11-354E23.3  | 0.32  | 9.18E-02 | 0.03  | 8.97E-01 |
| RP11-798G7.5   | -0.08 | 6.71E-01 | 0.03  | 8.97E-01 |
| SNORD105       | 0.02  | 9.23E-01 | 0.03  | 8.97E-01 |
| ASIC3          | -0.19 | 3.24E-01 | -0.03 | 8.97E-01 |
| BAG6           | 0.19  | 3.40E-01 | -0.03 | 8.97E-01 |
| CHAF1A         | -0.16 | 4.20E-01 | -0.03 | 8.97E-01 |
| DAP3           | 0.15  | 4.34E-01 | -0.03 | 8.97E-01 |
| EEF1A1P11      | 0.19  | 3.33E-01 | -0.03 | 8.97E-01 |
| GRIK2          | -0.11 | 5.78E-01 | -0.03 | 8.97E-01 |
| MAMSTR         | -0.35 | 6.52E-02 | -0.03 | 8.97E-01 |
| POP4           | 0.03  | 8.64E-01 | -0.03 | 8.97E-01 |
| RP11-1055B8.2  | 0.15  | 4.44E-01 | -0.03 | 8.97E-01 |
| RP11-466A19.4  | -0.29 | 1.28E-01 | -0.03 | 8.97E-01 |
| RP11-603J24.21 | -0.19 | 3.32E-01 | -0.03 | 8.97E-01 |
| SELT           | 0.08  | 6.95E-01 | -0.03 | 8.97E-01 |
| SLC16A6        | 0.13  | 4.94E-01 | -0.03 | 8.97E-01 |
| TMEM63A        | -0.13 | 4.96E-01 | -0.03 | 8.97E-01 |
| WTIP           | 0.22  | 2.61E-01 | -0.03 | 8.97E-01 |
| ZNF10          | 0.24  | 2.25E-01 | -0.03 | 8.97E-01 |
| AC009229.6     | -0.32 | 9.93E-02 | -0.03 | 8.98E-01 |
| AC097721.2     | 0.05  | 7.96E-01 | -0.03 | 8.98E-01 |
| CHODL          | -0.07 | 7.14E-01 | -0.03 | 8.98E-01 |
| CTB-133G6.1    | -0.01 | 9.74E-01 | -0.03 | 8.98E-01 |
| FAUP1          | 0.21  | 2.83E-01 | -0.03 | 8.98E-01 |
| FBXL17         | 0.06  | 7.79E-01 | -0.03 | 8.98E-01 |
| GALNT3         | 0.02  | 9.13E-01 | -0.03 | 8.98E-01 |
| HIF1A-AS2      | 0.26  | 1.79E-01 | -0.03 | 8.98E-01 |
| LMNB2          | 0.06  | 7.81E-01 | -0.03 | 8.98E-01 |
| LRRC37A15P     | 0.24  | 2.23E-01 | -0.03 | 8.98E-01 |
| MTND5P11       | -0.10 | 5.96E-01 | -0.03 | 8.98E-01 |
| PLA2G4E-AS1    | 0.22  | 2.57E-01 | -0.03 | 8.98E-01 |
| RP11-106M3.3   | 0.14  | 4.79E-01 | -0.03 | 8.98E-01 |
| RP11-6J21.2    | -0.07 | 7.38E-01 | -0.03 | 8.98E-01 |
| RP3-406P24.4   | -0.21 | 2.76E-01 | -0.03 | 8.98E-01 |
| SEPT7-AS1      | -0.21 | 2.89E-01 | -0.03 | 8.98E-01 |
| THOP1          | 0.10  | 6.01E-01 | -0.03 | 8.98E-01 |
| TMED10         | 0.04  | 8.42E-01 | -0.03 | 8.98E-01 |
| TMEM74B        | -0.20 | 3.09E-01 | -0.03 | 8.98E-01 |
| URAHP          | -0.12 | 5.31E-01 | -0.03 | 8.98E-01 |
| ZIC1           | -0.03 | 8.65E-01 | -0.03 | 8.98E-01 |
| ANXA2          | 0.07  | 7.16E-01 | 0.03  | 8.98E-01 |
| ARRDC4         | 0.09  | 6.34E-01 | 0.03  | 8.98E-01 |
| CAPN15         | 0.17  | 3.85E-01 | 0.03  | 8.98E-01 |
| CCDC68         | -0.03 | 8.79E-01 | 0.03  | 8.98E-01 |
| CXCL16         | 0.10  | 6.23E-01 | 0.03  | 8.98E-01 |

|                |       |          |       |          |
|----------------|-------|----------|-------|----------|
| FAM25G         | -0.10 | 6.01E-01 | 0.03  | 8.98E-01 |
| G895           | 0.11  | 5.92E-01 | 0.03  | 8.98E-01 |
| MED12L         | 0.34  | 8.05E-02 | 0.03  | 8.98E-01 |
| MRPL48         | -0.06 | 7.46E-01 | 0.03  | 8.98E-01 |
| MUC19          | -0.23 | 2.40E-01 | 0.03  | 8.98E-01 |
| PSAT1          | 0.32  | 9.53E-02 | 0.03  | 8.98E-01 |
| RP11-968A15.8  | 0.09  | 6.59E-01 | 0.03  | 8.98E-01 |
| RP11-9H20.2    | -0.20 | 2.96E-01 | 0.03  | 8.98E-01 |
| RRP36          | 0.25  | 1.94E-01 | 0.03  | 8.98E-01 |
| RUVBL1         | 0.09  | 6.53E-01 | 0.03  | 8.98E-01 |
| SCARNA2        | 0.10  | 6.12E-01 | 0.03  | 8.98E-01 |
| SLCO1C1        | -0.06 | 7.76E-01 | 0.03  | 8.98E-01 |
| ANKRA2         | 0.12  | 5.29E-01 | 0.03  | 8.99E-01 |
| ARHGAP11A      | 0.12  | 5.55E-01 | 0.03  | 8.99E-01 |
| BANF1P4        | -0.08 | 6.70E-01 | -0.03 | 8.99E-01 |
| C12orf29       | 0.13  | 5.01E-01 | -0.03 | 8.99E-01 |
| CCDC183        | -0.29 | 1.41E-01 | 0.03  | 8.99E-01 |
| CXCR2          | 0.16  | 4.24E-01 | 0.03  | 8.99E-01 |
| DFNB59         | -0.03 | 8.87E-01 | -0.03 | 8.99E-01 |
| ERVW-1         | -0.37 | 5.20E-02 | -0.03 | 8.99E-01 |
| FAM98C         | -0.09 | 6.34E-01 | 0.03  | 8.99E-01 |
| FBXL19-AS1     | 0.32  | 9.96E-02 | 0.03  | 8.99E-01 |
| FLJ42969       | 0.12  | 5.44E-01 | 0.03  | 8.99E-01 |
| IDO1           | 0.19  | 3.24E-01 | 0.03  | 8.99E-01 |
| INO80E         | -0.05 | 8.12E-01 | 0.03  | 8.99E-01 |
| MIXL1          | 0.21  | 2.91E-01 | -0.03 | 8.99E-01 |
| MYL5           | 0.02  | 9.31E-01 | 0.03  | 8.99E-01 |
| POLR2A         | -0.18 | 3.61E-01 | 0.03  | 8.99E-01 |
| POLR2B         | 0.08  | 6.85E-01 | -0.03 | 8.99E-01 |
| RNA5SP371      | 0.21  | 2.87E-01 | 0.03  | 8.99E-01 |
| RNU6-82P       | 0.25  | 1.95E-01 | -0.03 | 8.99E-01 |
| RP11-22N12.2   | -0.27 | 1.72E-01 | -0.03 | 8.99E-01 |
| RP11-370I10.12 | -0.09 | 6.42E-01 | -0.03 | 8.99E-01 |
| RP11-474P2.5   | -0.32 | 9.65E-02 | -0.03 | 8.99E-01 |
| RP11-881L2.1   | -0.24 | 2.11E-01 | -0.03 | 8.99E-01 |
| RP3-510H16.3   | -0.21 | 2.80E-01 | 0.03  | 8.99E-01 |
| RP4-756H11.3   | 0.21  | 2.73E-01 | 0.03  | 8.99E-01 |
| SLC25A3        | 0.13  | 5.23E-01 | -0.03 | 8.99E-01 |
| SLC38A3        | -0.19 | 3.39E-01 | 0.03  | 8.99E-01 |
| THOC7          | 0.01  | 9.72E-01 | -0.03 | 8.99E-01 |
| ZNF593         | 0.29  | 1.28E-01 | -0.03 | 8.99E-01 |
| AC005104.3     | -0.08 | 6.71E-01 | 0.03  | 9.00E-01 |
| AC116035.1     | -0.20 | 3.04E-01 | 0.03  | 9.00E-01 |
| ADPRHL1        | 0.17  | 3.83E-01 | 0.03  | 9.00E-01 |
| AL391416.1     | -0.07 | 7.11E-01 | 0.03  | 9.00E-01 |
| CTD-2035E11.3  | 0.01  | 9.63E-01 | 0.03  | 9.00E-01 |
| CTD-2083E4.6   | 0.20  | 3.04E-01 | 0.03  | 9.00E-01 |



|               |       |          |       |          |
|---------------|-------|----------|-------|----------|
| DHX33         | 0.18  | 3.49E-01 | 0.03  | 9.00E-01 |
| EIF3A         | 0.12  | 5.31E-01 | 0.03  | 9.00E-01 |
| G10272        | -0.03 | 8.92E-01 | 0.03  | 9.00E-01 |
| G22953        | 0.01  | 9.68E-01 | 0.03  | 9.00E-01 |
| GPR82         | 0.33  | 8.24E-02 | 0.03  | 9.00E-01 |
| HMGB1P37      | -0.15 | 4.56E-01 | 0.03  | 9.00E-01 |
| MKRN5P        | 0.00  | 9.96E-01 | 0.03  | 9.00E-01 |
| NMT2          | -0.02 | 9.08E-01 | 0.03  | 9.00E-01 |
| RP11-15M15.2  | -0.11 | 5.82E-01 | 0.03  | 9.00E-01 |
| RP11-432F4.2  | -0.06 | 7.43E-01 | 0.03  | 9.00E-01 |
| XPO7          | 0.02  | 9.20E-01 | 0.03  | 9.00E-01 |
| AC002128.5    | -0.15 | 4.39E-01 | -0.03 | 9.00E-01 |
| AC003989.4    | 0.18  | 3.57E-01 | -0.03 | 9.00E-01 |
| BCAT2         | 0.24  | 2.18E-01 | -0.03 | 9.00E-01 |
| BNIP3P5       | 0.14  | 4.81E-01 | -0.03 | 9.00E-01 |
| CLCP2         | -0.21 | 2.83E-01 | -0.03 | 9.00E-01 |
| CTD-3162L10.1 | 0.19  | 3.32E-01 | -0.03 | 9.00E-01 |
| DUSP3         | 0.05  | 8.16E-01 | -0.03 | 9.00E-01 |
| DVL1          | -0.11 | 5.69E-01 | -0.03 | 9.00E-01 |
| GRM2          | -0.10 | 6.17E-01 | -0.03 | 9.00E-01 |
| KB-318B8.7    | -0.14 | 4.66E-01 | -0.03 | 9.00E-01 |
| NR2C1         | -0.10 | 6.13E-01 | -0.03 | 9.00E-01 |
| OSGEPL1-AS1   | -0.15 | 4.39E-01 | -0.03 | 9.00E-01 |
| POMP          | 0.00  | 9.85E-01 | -0.03 | 9.00E-01 |
| PPIE          | -0.15 | 4.36E-01 | -0.03 | 9.00E-01 |
| RN7SL403P     | 0.00  | 9.89E-01 | -0.03 | 9.00E-01 |
| RP11-417N10.3 | 0.27  | 1.66E-01 | -0.03 | 9.00E-01 |
| RP11-432J24.2 | -0.18 | 3.60E-01 | -0.03 | 9.00E-01 |
| SLC25A30-AS1  | -0.12 | 5.29E-01 | -0.03 | 9.00E-01 |
| TNFSF13B      | -0.01 | 9.51E-01 | -0.03 | 9.00E-01 |
| UQCRFS1P1     | 0.07  | 7.17E-01 | -0.03 | 9.00E-01 |
| AC009480.3    | -0.01 | 9.79E-01 | 0.03  | 9.01E-01 |
| AC024568.1    | 0.23  | 2.37E-01 | 0.03  | 9.01E-01 |
| AC104667.3    | 0.22  | 2.61E-01 | 0.03  | 9.01E-01 |
| ACKR1         | -0.09 | 6.53E-01 | 0.03  | 9.01E-01 |
| ADGRL2        | 0.14  | 4.89E-01 | -0.03 | 9.01E-01 |
| AP000347.2    | -0.08 | 6.89E-01 | 0.03  | 9.01E-01 |
| AP000568.2    | -0.31 | 1.05E-01 | 0.03  | 9.01E-01 |
| CATSPER2      | 0.13  | 5.03E-01 | 0.03  | 9.01E-01 |
| CEACAM21      | -0.03 | 8.98E-01 | -0.03 | 9.01E-01 |
| CH17-335B8.4  | -0.14 | 4.90E-01 | 0.03  | 9.01E-01 |
| CTD-3065B20.3 | -0.04 | 8.58E-01 | 0.03  | 9.01E-01 |
| HDLBP         | -0.04 | 8.42E-01 | -0.03 | 9.01E-01 |
| ITFG1-AS1     | -0.16 | 4.26E-01 | 0.03  | 9.01E-01 |
| MIR644A       | -0.19 | 3.22E-01 | 0.03  | 9.01E-01 |
| NDUFB8        | 0.18  | 3.69E-01 | 0.03  | 9.01E-01 |
| OSTF1         | 0.18  | 3.49E-01 | 0.03  | 9.01E-01 |

|                      |       |          |       |          |
|----------------------|-------|----------|-------|----------|
| <b>PDCD2L</b>        | 0.04  | 8.57E-01 | 0.03  | 9.01E-01 |
| <b>PDIA3</b>         | 0.06  | 7.53E-01 | -0.03 | 9.01E-01 |
| <b>PRMT9</b>         | -0.14 | 4.72E-01 | 0.03  | 9.01E-01 |
| <b>RNA5SP160</b>     | 0.16  | 4.10E-01 | 0.03  | 9.01E-01 |
| <b>RP11-130F10.1</b> | 0.06  | 7.63E-01 | 0.03  | 9.01E-01 |
| <b>RP11-331F4.4</b>  | -0.02 | 9.35E-01 | 0.03  | 9.01E-01 |
| <b>RP11-367H1.1</b>  | 0.08  | 7.03E-01 | 0.03  | 9.01E-01 |
| <b>RP11-404F10.2</b> | -0.11 | 5.93E-01 | 0.03  | 9.01E-01 |
| <b>RP11-425D17.1</b> | 0.27  | 1.72E-01 | -0.03 | 9.01E-01 |
| <b>RP11-477D19.2</b> | -0.27 | 1.70E-01 | -0.03 | 9.01E-01 |
| <b>RP11-496H15.2</b> | -0.04 | 8.23E-01 | -0.03 | 9.01E-01 |
| <b>RP11-666A8.8</b>  | 0.03  | 8.88E-01 | -0.03 | 9.01E-01 |
| <b>RPS13</b>         | 0.15  | 4.37E-01 | -0.03 | 9.01E-01 |
| <b>RPS2P45</b>       | -0.03 | 8.88E-01 | 0.03  | 9.01E-01 |
| <b>SCARNA16</b>      | -0.09 | 6.57E-01 | -0.03 | 9.01E-01 |
| <b>SLC16A11</b>      | -0.07 | 7.16E-01 | -0.03 | 9.01E-01 |
| <b>TRMT10A</b>       | -0.07 | 7.22E-01 | -0.03 | 9.01E-01 |
| <b>UBE2L3</b>        | 0.08  | 6.78E-01 | 0.03  | 9.01E-01 |
| <b>AC093627.12</b>   | 0.31  | 1.05E-01 | 0.02  | 9.03E-01 |
| <b>ACSL4</b>         | 0.09  | 6.60E-01 | -0.02 | 9.03E-01 |
| <b>ACTR5</b>         | -0.10 | 6.03E-01 | 0.02  | 9.03E-01 |
| <b>AP001610.5</b>    | 0.09  | 6.55E-01 | 0.02  | 9.03E-01 |
| <b>CCDC113</b>       | -0.24 | 2.15E-01 | 0.02  | 9.03E-01 |
| <b>CDC123</b>        | 0.15  | 4.46E-01 | 0.02  | 9.03E-01 |
| <b>CICP16</b>        | -0.14 | 4.65E-01 | -0.02 | 9.03E-01 |
| <b>CTBP1</b>         | 0.02  | 9.01E-01 | 0.02  | 9.03E-01 |
| <b>DHRS4L1</b>       | -0.14 | 4.86E-01 | -0.02 | 9.03E-01 |
| <b>EXOC5P1</b>       | 0.13  | 5.18E-01 | -0.02 | 9.03E-01 |
| <b>FAM101A</b>       | -0.05 | 7.83E-01 | 0.02  | 9.03E-01 |
| <b>GXYLT1</b>        | -0.26 | 1.78E-01 | -0.02 | 9.03E-01 |
| <b>HEXDC</b>         | -0.13 | 4.99E-01 | -0.02 | 9.03E-01 |
| <b>HYAL2</b>         | 0.05  | 8.18E-01 | 0.02  | 9.03E-01 |
| <b>IFT20</b>         | -0.30 | 1.24E-01 | 0.02  | 9.03E-01 |
| <b>IMMP1LP1</b>      | -0.20 | 3.05E-01 | 0.02  | 9.03E-01 |
| <b>JMJD1C-AS1</b>    | -0.07 | 7.42E-01 | -0.02 | 9.03E-01 |
| <b>KCNE3</b>         | -0.01 | 9.63E-01 | -0.02 | 9.03E-01 |
| <b>MMAB</b>          | 0.13  | 5.26E-01 | -0.02 | 9.03E-01 |
| <b>MORF4L1</b>       | 0.00  | 9.85E-01 | 0.02  | 9.03E-01 |
| <b>NDUFB7</b>        | 0.10  | 6.31E-01 | 0.02  | 9.03E-01 |
| <b>NDUFS1</b>        | 0.31  | 1.10E-01 | 0.02  | 9.03E-01 |
| <b>PAN2</b>          | -0.15 | 4.50E-01 | 0.02  | 9.03E-01 |
| <b>PAXBP1-AS1</b>    | 0.28  | 1.56E-01 | 0.02  | 9.03E-01 |
| <b>PTPRD-AS1</b>     | 0.23  | 2.40E-01 | 0.02  | 9.03E-01 |
| <b>RANBP3L</b>       | 0.21  | 2.80E-01 | 0.02  | 9.03E-01 |
| <b>RBM4</b>          | 0.14  | 4.77E-01 | 0.02  | 9.03E-01 |
| <b>RNASE3</b>        | 0.17  | 3.83E-01 | 0.02  | 9.03E-01 |
| <b>RNU6-1024P</b>    | 0.00  | 9.86E-01 | 0.02  | 9.03E-01 |

|                      |       |          |       |          |
|----------------------|-------|----------|-------|----------|
| <b>RP11-100G15.4</b> | -0.04 | 8.42E-01 | 0.02  | 9.03E-01 |
| <b>RP11-228B15.4</b> | -0.13 | 5.24E-01 | -0.02 | 9.03E-01 |
| <b>RP13-20L14.10</b> | -0.35 | 7.08E-02 | 0.02  | 9.03E-01 |
| <b>RP5-908M14.10</b> | -0.10 | 6.31E-01 | -0.02 | 9.03E-01 |
| <b>RP5-965G21.4</b>  | -0.02 | 9.20E-01 | -0.02 | 9.03E-01 |
| <b>RPL22</b>         | 0.06  | 7.54E-01 | -0.02 | 9.03E-01 |
| <b>RPL36AP48</b>     | -0.23 | 2.30E-01 | -0.02 | 9.03E-01 |
| <b>SNORA9</b>        | -0.29 | 1.41E-01 | 0.02  | 9.03E-01 |
| <b>SRP72</b>         | 0.03  | 8.80E-01 | -0.02 | 9.03E-01 |
| <b>AC104534.2</b>    | -0.19 | 3.44E-01 | -0.02 | 9.04E-01 |
| <b>AP000925.2</b>    | -0.27 | 1.62E-01 | 0.02  | 9.04E-01 |
| <b>AP001172.3</b>    | 0.08  | 6.90E-01 | 0.02  | 9.04E-01 |
| <b>ARNT2</b>         | -0.16 | 4.12E-01 | -0.02 | 9.04E-01 |
| <b>CETN4P</b>        | -0.35 | 6.50E-02 | 0.02  | 9.04E-01 |
| <b>CTB-58E17.1</b>   | 0.33  | 8.45E-02 | -0.02 | 9.04E-01 |
| <b>CTD-2588E21.1</b> | 0.15  | 4.39E-01 | 0.02  | 9.04E-01 |
| <b>ERICH6B</b>       | 0.23  | 2.44E-01 | 0.02  | 9.04E-01 |
| <b>GJA1P1</b>        | 0.33  | 8.26E-02 | 0.02  | 9.04E-01 |
| <b>GPR162</b>        | 0.00  | 9.98E-01 | -0.02 | 9.04E-01 |
| <b>HADHAP1</b>       | 0.06  | 7.61E-01 | 0.02  | 9.04E-01 |
| <b>ICMT</b>          | 0.02  | 9.24E-01 | -0.02 | 9.04E-01 |
| <b>IGLV1-50</b>      | 0.24  | 2.18E-01 | -0.02 | 9.04E-01 |
| <b>LDHAL6A</b>       | -0.24 | 2.23E-01 | 0.02  | 9.04E-01 |
| <b>MIS12</b>         | -0.02 | 9.32E-01 | 0.02  | 9.04E-01 |
| <b>MS4A1</b>         | 0.18  | 3.71E-01 | -0.02 | 9.04E-01 |
| <b>NACC1</b>         | 0.23  | 2.32E-01 | 0.02  | 9.04E-01 |
| <b>NBPF13P</b>       | -0.24 | 2.16E-01 | 0.02  | 9.04E-01 |
| <b>NLGN2</b>         | -0.07 | 7.14E-01 | -0.02 | 9.04E-01 |
| <b>PA2G4</b>         | 0.09  | 6.53E-01 | -0.02 | 9.04E-01 |
| <b>PAQR7</b>         | -0.22 | 2.56E-01 | 0.02  | 9.04E-01 |
| <b>PARVA</b>         | -0.10 | 5.97E-01 | -0.02 | 9.04E-01 |
| <b>PCSK6-AS1</b>     | 0.40  | 3.73E-02 | 0.02  | 9.04E-01 |
| <b>PHTF2</b>         | 0.27  | 1.65E-01 | -0.02 | 9.04E-01 |
| <b>PUS10</b>         | 0.17  | 3.82E-01 | 0.02  | 9.04E-01 |
| <b>RP11-136K14.1</b> | 0.06  | 7.46E-01 | 0.02  | 9.04E-01 |
| <b>RP11-363N22.3</b> | 0.11  | 5.62E-01 | -0.02 | 9.04E-01 |
| <b>RP11-493E12.2</b> | 0.03  | 8.69E-01 | -0.02 | 9.04E-01 |
| <b>RP11-599B13.3</b> | 0.09  | 6.41E-01 | -0.02 | 9.04E-01 |
| <b>STARD4-AS1</b>    | -0.21 | 2.92E-01 | 0.02  | 9.04E-01 |
| <b>XPNPEP2</b>       | -0.26 | 1.86E-01 | -0.02 | 9.04E-01 |
| <b>AC005519.4</b>    | -0.22 | 2.53E-01 | -0.02 | 9.05E-01 |
| <b>AC009961.2</b>    | 0.08  | 6.88E-01 | -0.02 | 9.05E-01 |
| <b>AC016559.1</b>    | 0.00  | 9.92E-01 | 0.02  | 9.05E-01 |
| <b>AC080125.1</b>    | -0.18 | 3.54E-01 | -0.02 | 9.05E-01 |
| <b>ATAD2</b>         | 0.01  | 9.58E-01 | -0.02 | 9.05E-01 |
| <b>CMTM8</b>         | 0.08  | 6.76E-01 | 0.02  | 9.05E-01 |
| <b>CTC-510F12.7</b>  | -0.22 | 2.65E-01 | -0.02 | 9.05E-01 |

|                      |       |          |       |          |
|----------------------|-------|----------|-------|----------|
| <b>CTC-523E23.1</b>  | -0.13 | 4.95E-01 | 0.02  | 9.05E-01 |
| <b>DCAF13P3</b>      | -0.33 | 9.12E-02 | 0.02  | 9.05E-01 |
| <b>DLD</b>           | 0.23  | 2.38E-01 | -0.02 | 9.05E-01 |
| <b>ENPP7P8</b>       | 0.00  | 9.86E-01 | 0.02  | 9.05E-01 |
| <b>EVA1A</b>         | -0.27 | 1.70E-01 | 0.02  | 9.05E-01 |
| <b>G26738</b>        | 0.17  | 3.86E-01 | -0.02 | 9.05E-01 |
| <b>GPS2</b>          | -0.29 | 1.31E-01 | 0.02  | 9.05E-01 |
| <b>GRIK5</b>         | 0.28  | 1.55E-01 | -0.02 | 9.05E-01 |
| <b>HIST1H2AJ</b>     | 0.06  | 7.43E-01 | -0.02 | 9.05E-01 |
| <b>HTR5BP</b>        | -0.32 | 9.74E-02 | 0.02  | 9.05E-01 |
| <b>IFIT1P1</b>       | -0.08 | 6.92E-01 | 0.02  | 9.05E-01 |
| <b>ITGA1</b>         | 0.13  | 5.11E-01 | 0.02  | 9.05E-01 |
| <b>KLF6</b>          | -0.40 | 3.29E-02 | 0.02  | 9.05E-01 |
| <b>LSM4</b>          | 0.14  | 4.83E-01 | -0.02 | 9.05E-01 |
| <b>OTUD4P1</b>       | 0.35  | 7.15E-02 | -0.02 | 9.05E-01 |
| <b>OVOL1-AS1</b>     | -0.27 | 1.61E-01 | -0.02 | 9.05E-01 |
| <b>PITPNA-AS1</b>    | 0.00  | 9.83E-01 | 0.02  | 9.05E-01 |
| <b>PTBP3</b>         | 0.16  | 4.22E-01 | -0.02 | 9.05E-01 |
| <b>RP11-114G22.1</b> | -0.18 | 3.57E-01 | -0.02 | 9.05E-01 |
| <b>RP11-275I4.1</b>  | -0.03 | 8.95E-01 | 0.02  | 9.05E-01 |
| <b>RP11-407G23.2</b> | 0.01  | 9.71E-01 | -0.02 | 9.05E-01 |
| <b>RP11-585P4.6</b>  | 0.21  | 2.89E-01 | -0.02 | 9.05E-01 |
| <b>RP11-818O24.2</b> | -0.10 | 6.31E-01 | -0.02 | 9.05E-01 |
| <b>RP11-855A2.2</b>  | -0.28 | 1.51E-01 | 0.02  | 9.05E-01 |
| <b>RP4-714D9.2</b>   | -0.10 | 6.31E-01 | 0.02  | 9.05E-01 |
| <b>RP5-1028L10.2</b> | -0.17 | 3.83E-01 | 0.02  | 9.05E-01 |
| <b>RPL12P15</b>      | -0.11 | 5.78E-01 | -0.02 | 9.05E-01 |
| <b>SNRPF</b>         | 0.02  | 9.03E-01 | -0.02 | 9.05E-01 |
| <b>SNRPGP6</b>       | -0.01 | 9.55E-01 | -0.02 | 9.05E-01 |
| <b>SOWAHD</b>        | 0.17  | 3.88E-01 | -0.02 | 9.05E-01 |
| <b>STX16-NPEPL1</b>  | 0.05  | 7.91E-01 | -0.02 | 9.05E-01 |
| <b>TBC1D23</b>       | -0.02 | 9.26E-01 | -0.02 | 9.05E-01 |
| <b>VTA1P1</b>        | -0.41 | 3.15E-02 | 0.02  | 9.05E-01 |
| <b>WASH1</b>         | -0.31 | 1.14E-01 | 0.02  | 9.05E-01 |
| <b>ZBTB33</b>        | -0.06 | 7.78E-01 | -0.02 | 9.05E-01 |
| <b>ZC2HC1C</b>       | 0.06  | 7.51E-01 | -0.02 | 9.05E-01 |
| <b>ZNF484</b>        | 0.06  | 7.44E-01 | 0.02  | 9.05E-01 |
| <b>AC009970.1</b>    | 0.20  | 3.10E-01 | -0.02 | 9.06E-01 |
| <b>AC074366.3</b>    | 0.05  | 7.99E-01 | -0.02 | 9.06E-01 |
| <b>ACTBL2</b>        | -0.02 | 9.29E-01 | -0.02 | 9.06E-01 |
| <b>BPTF</b>          | -0.05 | 8.19E-01 | 0.02  | 9.06E-01 |
| <b>COL14A1</b>       | -0.23 | 2.34E-01 | 0.02  | 9.06E-01 |
| <b>CTD-2555A7.3</b>  | 0.02  | 9.20E-01 | -0.02 | 9.06E-01 |
| <b>FAM169A</b>       | 0.19  | 3.36E-01 | -0.02 | 9.06E-01 |
| <b>FERP1</b>         | -0.04 | 8.39E-01 | 0.02  | 9.06E-01 |
| <b>G18534</b>        | -0.43 | 2.30E-02 | -0.02 | 9.06E-01 |
| <b>G38528</b>        | -0.05 | 8.12E-01 | -0.02 | 9.06E-01 |

|               |       |          |       |          |
|---------------|-------|----------|-------|----------|
| G39254        | 0.12  | 5.42E-01 | -0.02 | 9.06E-01 |
| HOXC-AS1      | -0.18 | 3.54E-01 | 0.02  | 9.06E-01 |
| IGFL1P1       | -0.22 | 2.52E-01 | -0.02 | 9.06E-01 |
| LA16c-385E7.1 | -0.22 | 2.66E-01 | -0.02 | 9.06E-01 |
| MTND2P28      | 0.22  | 2.71E-01 | 0.02  | 9.06E-01 |
| MYOCD         | 0.12  | 5.57E-01 | 0.02  | 9.06E-01 |
| NELFCD        | 0.25  | 2.02E-01 | 0.02  | 9.06E-01 |
| POLL          | 0.16  | 4.27E-01 | 0.02  | 9.06E-01 |
| PPP3CB        | -0.06 | 7.77E-01 | -0.02 | 9.06E-01 |
| RP11-204M4.2  | -0.20 | 3.16E-01 | 0.02  | 9.06E-01 |
| RP11-242O24.3 | 0.20  | 2.98E-01 | 0.02  | 9.06E-01 |
| RP11-286H14.4 | 0.23  | 2.41E-01 | -0.02 | 9.06E-01 |
| RP11-319G6.3  | -0.31 | 1.10E-01 | -0.02 | 9.06E-01 |
| RP11-635L1.2  | -0.02 | 9.16E-01 | 0.02  | 9.06E-01 |
| RPL23         | 0.14  | 4.64E-01 | -0.02 | 9.06E-01 |
| RPS7P11       | -0.02 | 9.31E-01 | -0.02 | 9.06E-01 |
| SAP30         | -0.05 | 7.93E-01 | 0.02  | 9.06E-01 |
| SATB2-AS1     | 0.13  | 5.09E-01 | -0.02 | 9.06E-01 |
| SETD1A        | -0.28 | 1.51E-01 | 0.02  | 9.06E-01 |
| SUCLG2P2      | -0.01 | 9.63E-01 | 0.02  | 9.06E-01 |
| TIGD4         | 0.01  | 9.60E-01 | -0.02 | 9.06E-01 |
| TMEM175       | -0.05 | 8.13E-01 | 0.02  | 9.06E-01 |
| UBE2V2        | 0.21  | 2.91E-01 | -0.02 | 9.06E-01 |
| ZMYND19       | -0.24 | 2.10E-01 | 0.02  | 9.06E-01 |
| snoR442       | -0.20 | 3.15E-01 | 0.02  | 9.06E-01 |
| ADAMTSL4-AS1  | -0.20 | 3.17E-01 | -0.02 | 9.07E-01 |
| BTNL9         | -0.30 | 1.18E-01 | -0.02 | 9.07E-01 |
| C12orf4       | 0.07  | 7.15E-01 | -0.02 | 9.07E-01 |
| C19orf24      | -0.02 | 9.00E-01 | -0.02 | 9.07E-01 |
| CELA2B        | -0.01 | 9.55E-01 | 0.02  | 9.07E-01 |
| CTD-2162K18.4 | -0.12 | 5.56E-01 | 0.02  | 9.07E-01 |
| CTU1          | 0.05  | 7.86E-01 | -0.02 | 9.07E-01 |
| CUL2          | 0.10  | 6.29E-01 | 0.02  | 9.07E-01 |
| FAM214B       | 0.19  | 3.30E-01 | 0.02  | 9.07E-01 |
| FAM66D        | -0.08 | 6.87E-01 | -0.02 | 9.07E-01 |
| FOXF1         | 0.04  | 8.38E-01 | -0.02 | 9.07E-01 |
| G28331        | -0.22 | 2.62E-01 | -0.02 | 9.07E-01 |
| HBEGF         | 0.16  | 4.08E-01 | -0.02 | 9.07E-01 |
| HIST1H3F      | 0.04  | 8.22E-01 | 0.02  | 9.07E-01 |
| HLTF          | 0.16  | 4.19E-01 | 0.02  | 9.07E-01 |
| HMG1P10       | 0.11  | 5.73E-01 | -0.02 | 9.07E-01 |
| KBTBD3        | -0.15 | 4.44E-01 | -0.02 | 9.07E-01 |
| NENFP1        | -0.31 | 1.05E-01 | 0.02  | 9.07E-01 |
| PSMD11        | 0.05  | 7.83E-01 | -0.02 | 9.07E-01 |
| RHOC          | -0.25 | 1.93E-01 | -0.02 | 9.07E-01 |
| RP11-365O16.6 | 0.18  | 3.60E-01 | 0.02  | 9.07E-01 |
| RP11-390F4.3  | 0.11  | 5.80E-01 | -0.02 | 9.07E-01 |

|               |       |          |       |          |
|---------------|-------|----------|-------|----------|
| RP11-401P9.6  | -0.26 | 1.75E-01 | 0.02  | 9.07E-01 |
| RP11-409I10.2 | -0.21 | 2.80E-01 | -0.02 | 9.07E-01 |
| RPS3          | 0.23  | 2.33E-01 | -0.02 | 9.07E-01 |
| SEC61A2       | -0.01 | 9.79E-01 | 0.02  | 9.07E-01 |
| SLU7          | -0.11 | 5.76E-01 | -0.02 | 9.07E-01 |
| SPAG8         | -0.03 | 8.62E-01 | -0.02 | 9.07E-01 |
| TMEM229B      | -0.02 | 9.25E-01 | 0.02  | 9.07E-01 |
| TRAPPC12-AS1  | 0.00  | 9.85E-01 | 0.02  | 9.07E-01 |
| TULP2         | -0.03 | 8.74E-01 | -0.02 | 9.07E-01 |
| UPK1B         | -0.18 | 3.66E-01 | -0.02 | 9.07E-01 |
| USP10         | 0.33  | 8.53E-02 | 0.02  | 9.07E-01 |
| XX-C2158C6.3  | 0.07  | 7.21E-01 | -0.02 | 9.07E-01 |
| ZSWIM3        | 0.21  | 2.93E-01 | -0.02 | 9.07E-01 |
| C11orf70      | -0.02 | 9.00E-01 | -0.02 | 9.09E-01 |
| C19orf33      | 0.05  | 7.86E-01 | -0.02 | 9.09E-01 |
| C2CD2L        | -0.23 | 2.48E-01 | -0.02 | 9.09E-01 |
| EIF3K         | 0.24  | 2.25E-01 | -0.02 | 9.09E-01 |
| FAM25C        | 0.00  | 9.93E-01 | -0.02 | 9.09E-01 |
| HIST1H2AH     | -0.04 | 8.27E-01 | -0.02 | 9.09E-01 |
| MIR181A1HG    | 0.15  | 4.44E-01 | -0.02 | 9.09E-01 |
| MROH8         | -0.03 | 8.88E-01 | -0.02 | 9.09E-01 |
| RP11-25K19.1  | 0.45  | 1.68E-02 | -0.02 | 9.09E-01 |
| RP11-294N21.3 | 0.19  | 3.22E-01 | -0.02 | 9.09E-01 |
| RP11-301G23.1 | -0.09 | 6.32E-01 | -0.02 | 9.09E-01 |
| RP11-332H14.2 | 0.13  | 5.05E-01 | -0.02 | 9.09E-01 |
| SMARCE1P6     | -0.07 | 7.09E-01 | -0.02 | 9.09E-01 |
| SOD1          | 0.00  | 9.92E-01 | -0.02 | 9.09E-01 |
| SPPL2B        | 0.00  | 9.94E-01 | -0.02 | 9.09E-01 |
| TRAPPC9       | -0.15 | 4.61E-01 | -0.02 | 9.09E-01 |
| ZNF192P1      | 0.08  | 6.95E-01 | -0.02 | 9.09E-01 |
| ABCD4         | -0.07 | 7.17E-01 | 0.02  | 9.09E-01 |
| B3GALT5-AS1   | -0.11 | 5.62E-01 | 0.02  | 9.09E-01 |
| CCT6B         | 0.32  | 9.42E-02 | 0.02  | 9.09E-01 |
| COL5A1        | -0.11 | 5.76E-01 | 0.02  | 9.09E-01 |
| G32186        | -0.36 | 6.09E-02 | 0.02  | 9.09E-01 |
| GNL1          | 0.32  | 9.45E-02 | 0.02  | 9.09E-01 |
| GOT2P2        | 0.11  | 5.79E-01 | 0.02  | 9.09E-01 |
| HEMGN         | 0.20  | 3.18E-01 | 0.02  | 9.09E-01 |
| HIST1H4D      | -0.14 | 4.69E-01 | 0.02  | 9.09E-01 |
| IDH3B         | 0.05  | 8.10E-01 | 0.02  | 9.09E-01 |
| ISPD-AS1      | 0.12  | 5.43E-01 | 0.02  | 9.09E-01 |
| KCNA3         | -0.12 | 5.48E-01 | 0.02  | 9.09E-01 |
| NDUFC2        | 0.07  | 7.31E-01 | 0.02  | 9.09E-01 |
| PPARG         | 0.01  | 9.55E-01 | 0.02  | 9.09E-01 |
| RBM38         | 0.20  | 3.14E-01 | 0.02  | 9.09E-01 |
| RP11-253M7.4  | -0.08 | 7.01E-01 | 0.02  | 9.09E-01 |
| RP11-809C18.3 | -0.09 | 6.62E-01 | 0.02  | 9.09E-01 |

|                |       |          |       |          |
|----------------|-------|----------|-------|----------|
| SKIV2L2        | 0.11  | 5.82E-01 | 0.02  | 9.09E-01 |
| SLC16A8        | -0.23 | 2.31E-01 | 0.02  | 9.09E-01 |
| WDR1           | 0.25  | 2.04E-01 | 0.02  | 9.09E-01 |
| AC005082.1     | -0.22 | 2.65E-01 | -0.02 | 9.10E-01 |
| AC007919.19    | 0.00  | 9.87E-01 | -0.02 | 9.10E-01 |
| AL136531.1     | 0.34  | 7.82E-02 | 0.02  | 9.10E-01 |
| AP5M1          | 0.13  | 5.13E-01 | 0.02  | 9.10E-01 |
| BZW1           | 0.20  | 3.01E-01 | 0.02  | 9.10E-01 |
| C19orf43       | 0.12  | 5.42E-01 | 0.02  | 9.10E-01 |
| CES3           | 0.24  | 2.20E-01 | 0.02  | 9.10E-01 |
| CKLF           | 0.06  | 7.73E-01 | -0.02 | 9.10E-01 |
| CTC-268N12.3   | -0.10 | 6.16E-01 | -0.02 | 9.10E-01 |
| CTC-484P3.3    | 0.06  | 7.45E-01 | 0.02  | 9.10E-01 |
| CTD-3020H12.4  | -0.24 | 2.10E-01 | 0.02  | 9.10E-01 |
| CTD-3126B10.5  | -0.24 | 2.27E-01 | 0.02  | 9.10E-01 |
| DNAL1          | 0.02  | 9.23E-01 | 0.02  | 9.10E-01 |
| GID4           | 0.07  | 7.13E-01 | -0.02 | 9.10E-01 |
| GRHL3          | 0.24  | 2.20E-01 | 0.02  | 9.10E-01 |
| HACD3          | -0.21 | 2.95E-01 | 0.02  | 9.10E-01 |
| LLPH-AS1       | -0.23 | 2.29E-01 | -0.02 | 9.10E-01 |
| MAB21L2        | -0.17 | 3.93E-01 | 0.02  | 9.10E-01 |
| ME1            | 0.17  | 3.85E-01 | -0.02 | 9.10E-01 |
| NT5DC2         | 0.02  | 9.27E-01 | 0.02  | 9.10E-01 |
| POLE3          | 0.14  | 4.75E-01 | -0.02 | 9.10E-01 |
| PPA2           | 0.13  | 5.12E-01 | 0.02  | 9.10E-01 |
| RNA5SP496      | 0.17  | 3.82E-01 | -0.02 | 9.10E-01 |
| RP11-1012A1.7  | -0.10 | 6.02E-01 | 0.02  | 9.10E-01 |
| RP11-274B21.12 | 0.11  | 5.78E-01 | -0.02 | 9.10E-01 |
| RP11-809N8.4   | 0.23  | 2.47E-01 | -0.02 | 9.10E-01 |
| SARNP          | 0.01  | 9.69E-01 | 0.02  | 9.10E-01 |
| SNORD115       | -0.20 | 3.02E-01 | 0.02  | 9.10E-01 |
| STARD13-AS     | -0.05 | 7.95E-01 | 0.02  | 9.10E-01 |
| STIP1          | 0.12  | 5.59E-01 | -0.02 | 9.10E-01 |
| TACR1          | -0.15 | 4.55E-01 | 0.02  | 9.10E-01 |
| TRAJ31         | -0.07 | 7.19E-01 | 0.02  | 9.10E-01 |
| XLOC_012803    | 0.01  | 9.64E-01 | -0.02 | 9.10E-01 |
| XLOC_013531    | -0.13 | 5.07E-01 | 0.02  | 9.10E-01 |
| ZFHX3          | 0.09  | 6.66E-01 | -0.02 | 9.10E-01 |
| ZNF708         | 0.18  | 3.50E-01 | -0.02 | 9.10E-01 |
| AL161645.1     | -0.17 | 4.00E-01 | 0.02  | 9.11E-01 |
| BAALC          | -0.08 | 6.87E-01 | 0.02  | 9.11E-01 |
| BEND3P1        | 0.01  | 9.66E-01 | -0.02 | 9.11E-01 |
| C5orf58        | 0.13  | 5.19E-01 | -0.02 | 9.11E-01 |
| CASP16P        | 0.14  | 4.63E-01 | -0.02 | 9.11E-01 |
| CFL1P1         | -0.14 | 4.81E-01 | 0.02  | 9.11E-01 |
| DCUN1D2-AS     | 0.06  | 7.68E-01 | -0.02 | 9.11E-01 |
| FZD1           | 0.07  | 7.32E-01 | 0.02  | 9.11E-01 |

|                |       |          |       |          |
|----------------|-------|----------|-------|----------|
| G33562         | 0.22  | 2.51E-01 | -0.02 | 9.11E-01 |
| HEATR1         | 0.11  | 5.74E-01 | -0.02 | 9.11E-01 |
| HOXA2          | -0.30 | 1.27E-01 | 0.02  | 9.11E-01 |
| IGLV3-19       | 0.28  | 1.55E-01 | -0.02 | 9.11E-01 |
| INTS5          | 0.36  | 6.15E-02 | -0.02 | 9.11E-01 |
| ITFG2          | -0.18 | 3.52E-01 | -0.02 | 9.11E-01 |
| LAMP5          | -0.10 | 6.23E-01 | 0.02  | 9.11E-01 |
| MMP23B         | -0.47 | 1.17E-02 | -0.02 | 9.11E-01 |
| MTCO2P15       | 0.01  | 9.68E-01 | -0.02 | 9.11E-01 |
| NUP50          | 0.12  | 5.31E-01 | 0.02  | 9.11E-01 |
| PDLIM2         | -0.20 | 3.02E-01 | -0.02 | 9.11E-01 |
| PHGDH          | 0.14  | 4.66E-01 | 0.02  | 9.11E-01 |
| PIGBOS1        | 0.33  | 8.56E-02 | 0.02  | 9.11E-01 |
| POLR2I         | 0.05  | 7.92E-01 | 0.02  | 9.11E-01 |
| POLR3K         | 0.13  | 5.09E-01 | 0.02  | 9.11E-01 |
| RNU6-720P      | -0.09 | 6.60E-01 | -0.02 | 9.11E-01 |
| RP11-330O11.3  | 0.25  | 1.92E-01 | 0.02  | 9.11E-01 |
| RP11-401F2.3   | -0.14 | 4.86E-01 | -0.02 | 9.11E-01 |
| RP11-480I12.9  | -0.14 | 4.83E-01 | -0.02 | 9.11E-01 |
| RP11-486B10.4  | -0.24 | 2.19E-01 | 0.02  | 9.11E-01 |
| RP11-795J1.2   | -0.06 | 7.72E-01 | 0.02  | 9.11E-01 |
| RPS2           | 0.13  | 5.23E-01 | 0.02  | 9.11E-01 |
| SCGB2A2        | -0.17 | 3.89E-01 | -0.02 | 9.11E-01 |
| SFT2D1         | 0.15  | 4.39E-01 | 0.02  | 9.11E-01 |
| SIPA1L3        | 0.24  | 2.19E-01 | -0.02 | 9.11E-01 |
| TBCCD1         | -0.05 | 7.96E-01 | 0.02  | 9.11E-01 |
| USP33          | 0.09  | 6.49E-01 | -0.02 | 9.11E-01 |
| XLOC_007934    | -0.06 | 7.46E-01 | -0.02 | 9.11E-01 |
| AC090420.1     | 0.12  | 5.57E-01 | 0.02  | 9.12E-01 |
| ATP1B2         | -0.04 | 8.40E-01 | 0.02  | 9.12E-01 |
| CNTRL          | 0.04  | 8.45E-01 | 0.02  | 9.12E-01 |
| DNAH100S       | -0.32 | 9.27E-02 | 0.02  | 9.12E-01 |
| HLA-DQA1       | -0.07 | 7.05E-01 | 0.02  | 9.12E-01 |
| KRT18          | -0.02 | 9.05E-01 | 0.02  | 9.12E-01 |
| LRRRC75A-AS1   | 0.10  | 6.28E-01 | 0.02  | 9.12E-01 |
| NPM1P39        | -0.07 | 7.09E-01 | 0.02  | 9.12E-01 |
| PSMB2          | 0.14  | 4.63E-01 | 0.02  | 9.12E-01 |
| RP11-574K11.24 | -0.21 | 2.73E-01 | 0.02  | 9.12E-01 |
| RP11-68I18.10  | 0.24  | 2.28E-01 | 0.02  | 9.12E-01 |
| SNORA13        | -0.07 | 7.37E-01 | 0.02  | 9.12E-01 |
| ZNF423         | -0.37 | 5.03E-02 | 0.02  | 9.12E-01 |
| AC096732.2     | 0.03  | 8.64E-01 | -0.02 | 9.12E-01 |
| AFM            | -0.17 | 3.76E-01 | -0.02 | 9.12E-01 |
| ATP9B          | -0.10 | 6.15E-01 | -0.02 | 9.12E-01 |
| CD200          | -0.22 | 2.71E-01 | -0.02 | 9.12E-01 |
| CTA-331F8.1    | 0.08  | 6.68E-01 | -0.02 | 9.12E-01 |
| DYX1C1         | 0.09  | 6.45E-01 | -0.02 | 9.12E-01 |



|                |       |          |       |          |
|----------------|-------|----------|-------|----------|
| E2F3-IT1       | 0.28  | 1.56E-01 | -0.02 | 9.12E-01 |
| INTS6          | 0.17  | 3.96E-01 | -0.02 | 9.12E-01 |
| LINC00885      | 0.09  | 6.37E-01 | -0.02 | 9.12E-01 |
| LZTS1          | 0.10  | 6.00E-01 | -0.02 | 9.12E-01 |
| MIR4729        | 0.33  | 8.81E-02 | -0.02 | 9.12E-01 |
| PINK1-AS       | 0.24  | 2.17E-01 | -0.02 | 9.12E-01 |
| PRDX3          | 0.10  | 6.02E-01 | -0.02 | 9.12E-01 |
| RP11-588L15.2  | 0.18  | 3.65E-01 | -0.02 | 9.12E-01 |
| RP11-7F18.2    | 0.05  | 8.13E-01 | -0.02 | 9.12E-01 |
| RP5-1139B12.3  | -0.05 | 8.05E-01 | -0.02 | 9.12E-01 |
| SPTY2D1        | 0.29  | 1.32E-01 | -0.02 | 9.12E-01 |
| SSBP1          | 0.13  | 5.16E-01 | -0.02 | 9.12E-01 |
| UPF3BP4        | -0.22 | 2.57E-01 | -0.02 | 9.12E-01 |
| XLOC_007830    | 0.03  | 8.81E-01 | -0.02 | 9.12E-01 |
| AC104058.1     | -0.28 | 1.44E-01 | 0.02  | 9.13E-01 |
| AL591668.1     | -0.03 | 8.65E-01 | -0.02 | 9.13E-01 |
| AP000350.6     | -0.10 | 6.17E-01 | 0.02  | 9.13E-01 |
| ARAP1-AS2      | -0.18 | 3.63E-01 | -0.02 | 9.13E-01 |
| ATF4           | 0.02  | 9.28E-01 | -0.02 | 9.13E-01 |
| CEP70          | 0.25  | 1.96E-01 | 0.02  | 9.13E-01 |
| CH17-174L20.1  | 0.05  | 7.98E-01 | -0.02 | 9.13E-01 |
| CRLF1          | -0.01 | 9.59E-01 | 0.02  | 9.13E-01 |
| CTD-2195B23.3  | 0.02  | 9.11E-01 | 0.02  | 9.13E-01 |
| CTD-2528L19.6  | -0.05 | 7.95E-01 | -0.02 | 9.13E-01 |
| CTD-2530H12.2  | 0.02  | 9.01E-01 | -0.02 | 9.13E-01 |
| CTD-3064M3.3   | 0.07  | 7.20E-01 | -0.02 | 9.13E-01 |
| FBN3           | -0.05 | 8.09E-01 | -0.02 | 9.13E-01 |
| G13690         | 0.12  | 5.31E-01 | -0.02 | 9.13E-01 |
| G23048         | 0.12  | 5.44E-01 | 0.02  | 9.13E-01 |
| G25498         | 0.08  | 6.99E-01 | 0.02  | 9.13E-01 |
| G4573          | -0.13 | 5.07E-01 | -0.02 | 9.13E-01 |
| GLCE           | 0.03  | 8.78E-01 | -0.02 | 9.13E-01 |
| GOLGA8R        | 0.07  | 7.28E-01 | -0.02 | 9.13E-01 |
| HNRNPA3        | -0.05 | 7.98E-01 | -0.02 | 9.13E-01 |
| IMPDH1P11      | -0.10 | 5.98E-01 | 0.02  | 9.13E-01 |
| LINC01572      | -0.13 | 5.10E-01 | -0.02 | 9.13E-01 |
| LLNLR-245B6.1  | 0.03  | 8.99E-01 | -0.02 | 9.13E-01 |
| MILR1          | -0.31 | 1.12E-01 | 0.02  | 9.13E-01 |
| MSC-AS1        | -0.28 | 1.51E-01 | -0.02 | 9.13E-01 |
| MTND5P14       | 0.13  | 4.98E-01 | -0.02 | 9.13E-01 |
| NOL7           | -0.14 | 4.64E-01 | -0.02 | 9.13E-01 |
| POMZP3         | -0.22 | 2.55E-01 | 0.02  | 9.13E-01 |
| RNASEH1-AS1    | 0.15  | 4.39E-01 | 0.02  | 9.13E-01 |
| RNU4-40P       | -0.13 | 5.05E-01 | 0.02  | 9.13E-01 |
| RP1-15D23.2    | -0.12 | 5.51E-01 | 0.02  | 9.13E-01 |
| RP11-390P24.1  | -0.26 | 1.85E-01 | -0.02 | 9.13E-01 |
| RP11-400F19.18 | 0.15  | 4.51E-01 | 0.02  | 9.13E-01 |

|                |       |          |       |          |
|----------------|-------|----------|-------|----------|
| RP11-73E17.2   | 0.06  | 7.60E-01 | 0.02  | 9.13E-01 |
| SLC6A6         | -0.05 | 8.03E-01 | 0.02  | 9.13E-01 |
| SLIRP          | 0.08  | 6.77E-01 | 0.02  | 9.13E-01 |
| SMC2           | 0.05  | 8.10E-01 | -0.02 | 9.13E-01 |
| SNORD63        | -0.10 | 6.17E-01 | -0.02 | 9.13E-01 |
| ST3GAL5-AS1    | -0.22 | 2.68E-01 | -0.02 | 9.13E-01 |
| WDR76          | -0.09 | 6.65E-01 | -0.02 | 9.13E-01 |
| XLOC_000566    | -0.09 | 6.36E-01 | -0.02 | 9.13E-01 |
| AC018463.4     | -0.06 | 7.47E-01 | 0.02  | 9.15E-01 |
| AC023632.1     | 0.01  | 9.63E-01 | -0.02 | 9.15E-01 |
| ACYP1          | -0.05 | 8.08E-01 | 0.02  | 9.15E-01 |
| AL590822.1     | -0.28 | 1.56E-01 | 0.02  | 9.15E-01 |
| APLP1          | 0.01  | 9.71E-01 | 0.02  | 9.15E-01 |
| BTF3P6         | 0.17  | 3.75E-01 | -0.02 | 9.15E-01 |
| CCDC152        | -0.27 | 1.61E-01 | 0.02  | 9.15E-01 |
| CHMP3          | 0.01  | 9.79E-01 | -0.02 | 9.15E-01 |
| FAM180B        | -0.09 | 6.48E-01 | -0.02 | 9.15E-01 |
| HLA-DQB1       | -0.01 | 9.59E-01 | 0.02  | 9.15E-01 |
| LILRA2         | 0.12  | 5.30E-01 | -0.02 | 9.15E-01 |
| LINC00898      | 0.01  | 9.46E-01 | 0.02  | 9.15E-01 |
| METAP2         | 0.14  | 4.76E-01 | -0.02 | 9.15E-01 |
| MKRN2          | 0.10  | 6.29E-01 | -0.02 | 9.15E-01 |
| NOP56          | 0.11  | 5.91E-01 | -0.02 | 9.15E-01 |
| PPP1R16A       | -0.07 | 7.11E-01 | -0.02 | 9.15E-01 |
| RAD51C         | -0.08 | 7.04E-01 | -0.02 | 9.15E-01 |
| RBM15          | 0.25  | 1.97E-01 | -0.02 | 9.15E-01 |
| RNASEH2B-AS1   | -0.12 | 5.36E-01 | -0.02 | 9.15E-01 |
| RP11-103J8.1   | -0.11 | 5.67E-01 | 0.02  | 9.15E-01 |
| RP11-1102P22.3 | -0.01 | 9.55E-01 | 0.02  | 9.15E-01 |
| RP11-231E19.1  | 0.08  | 7.03E-01 | -0.02 | 9.15E-01 |
| RP11-259G18.3  | 0.05  | 7.91E-01 | 0.02  | 9.15E-01 |
| RP11-504P24.9  | -0.10 | 6.12E-01 | -0.02 | 9.15E-01 |
| RP11-573D15.8  | 0.24  | 2.27E-01 | 0.02  | 9.15E-01 |
| RP11-881M11.2  | 0.06  | 7.81E-01 | 0.02  | 9.15E-01 |
| RP5-965G21.5   | 0.10  | 6.13E-01 | 0.02  | 9.15E-01 |
| YBX1P2         | 0.15  | 4.54E-01 | -0.02 | 9.15E-01 |
| APH1A          | 0.16  | 4.24E-01 | 0.02  | 9.16E-01 |
| CRHR2          | 0.20  | 3.15E-01 | 0.02  | 9.16E-01 |
| CYP4Z2P        | 0.27  | 1.63E-01 | 0.02  | 9.16E-01 |
| EEF1DP7        | -0.18 | 3.72E-01 | 0.02  | 9.16E-01 |
| FRMPD3         | 0.17  | 3.79E-01 | 0.02  | 9.16E-01 |
| IPO7P2         | 0.13  | 5.19E-01 | 0.02  | 9.16E-01 |
| MIR3680-1      | 0.23  | 2.35E-01 | 0.02  | 9.16E-01 |
| MIR4653        | -0.09 | 6.33E-01 | 0.02  | 9.16E-01 |
| PKD1           | -0.07 | 7.05E-01 | 0.02  | 9.16E-01 |
| PPP4R3B        | -0.02 | 9.00E-01 | 0.02  | 9.16E-01 |
| RP11-3J10.7    | 0.12  | 5.29E-01 | 0.02  | 9.16E-01 |

|               |       |          |       |          |
|---------------|-------|----------|-------|----------|
| RP11-510M2.2  | -0.04 | 8.44E-01 | 0.02  | 9.16E-01 |
| RP4-585I14.3  | 0.12  | 5.30E-01 | 0.02  | 9.16E-01 |
| THSD1         | 0.36  | 6.05E-02 | 0.02  | 9.16E-01 |
| WDR93         | -0.04 | 8.55E-01 | 0.02  | 9.16E-01 |
| ADCY10        | 0.15  | 4.40E-01 | -0.02 | 9.16E-01 |
| ANKRD9        | 0.12  | 5.57E-01 | -0.02 | 9.16E-01 |
| C1orf162      | 0.10  | 6.06E-01 | -0.02 | 9.16E-01 |
| CERS6-AS1     | -0.27 | 1.63E-01 | -0.02 | 9.16E-01 |
| FKSG61        | -0.33 | 8.40E-02 | -0.02 | 9.16E-01 |
| G16199        | 0.19  | 3.29E-01 | -0.02 | 9.16E-01 |
| HSPBP1        | 0.07  | 7.18E-01 | -0.02 | 9.16E-01 |
| MIR9-3HG      | 0.01  | 9.44E-01 | -0.02 | 9.16E-01 |
| PACRG         | 0.20  | 2.99E-01 | -0.02 | 9.16E-01 |
| PLCXD2        | 0.23  | 2.35E-01 | -0.02 | 9.16E-01 |
| RN7SKP38      | 0.17  | 3.75E-01 | -0.02 | 9.16E-01 |
| RP1-111C20.4  | -0.01 | 9.67E-01 | -0.02 | 9.16E-01 |
| RP11-1148O4.2 | -0.34 | 7.64E-02 | -0.02 | 9.16E-01 |
| RP11-440L14.1 | 0.10  | 6.05E-01 | -0.02 | 9.16E-01 |
| RP11-499P20.2 | -0.06 | 7.48E-01 | -0.02 | 9.16E-01 |
| RP11-701H24.8 | -0.23 | 2.44E-01 | -0.02 | 9.16E-01 |
| RP5-875H18.10 | -0.20 | 3.01E-01 | -0.02 | 9.16E-01 |
| SLC25A40      | 0.05  | 7.99E-01 | -0.02 | 9.16E-01 |
| SLC9A9        | 0.03  | 8.86E-01 | -0.02 | 9.16E-01 |
| SNORA36       | 0.02  | 9.22E-01 | -0.02 | 9.16E-01 |
| SSRP1         | 0.07  | 7.41E-01 | -0.02 | 9.16E-01 |
| TDRP          | -0.28 | 1.42E-01 | -0.02 | 9.16E-01 |
| UBA5          | 0.09  | 6.48E-01 | -0.02 | 9.16E-01 |
| VPS45         | 0.11  | 5.66E-01 | -0.02 | 9.16E-01 |
| WSB1          | -0.01 | 9.61E-01 | -0.02 | 9.16E-01 |
| ZC3H14        | -0.06 | 7.65E-01 | -0.02 | 9.16E-01 |
| AC006994.1    | -0.25 | 1.94E-01 | 0.02  | 9.17E-01 |
| AC139100.3    | 0.03  | 8.97E-01 | -0.02 | 9.17E-01 |
| ANKRD55       | 0.06  | 7.64E-01 | -0.02 | 9.17E-01 |
| ARCN1         | 0.15  | 4.50E-01 | 0.02  | 9.17E-01 |
| B4GALT5       | 0.00  | 9.87E-01 | -0.02 | 9.17E-01 |
| BACH1-IT1     | -0.06 | 7.73E-01 | 0.02  | 9.17E-01 |
| C1orf123      | 0.24  | 2.27E-01 | -0.02 | 9.17E-01 |
| CBX3P4        | -0.08 | 6.87E-01 | -0.02 | 9.17E-01 |
| CYP4V2        | 0.21  | 2.83E-01 | -0.02 | 9.17E-01 |
| FARS2         | -0.02 | 9.04E-01 | -0.02 | 9.17E-01 |
| G25250        | 0.07  | 7.35E-01 | 0.02  | 9.17E-01 |
| G38698        | -0.05 | 8.11E-01 | 0.02  | 9.17E-01 |
| G39812        | -0.06 | 7.59E-01 | 0.02  | 9.17E-01 |
| PFDN2         | 0.01  | 9.76E-01 | 0.02  | 9.17E-01 |
| PGPEP1L       | 0.08  | 6.94E-01 | -0.02 | 9.17E-01 |
| PHRF1         | 0.10  | 6.12E-01 | 0.02  | 9.17E-01 |
| PLEKHM1P      | -0.17 | 3.79E-01 | 0.02  | 9.17E-01 |

|                      |       |          |       |          |
|----------------------|-------|----------|-------|----------|
| <b>POGLUT1</b>       | 0.45  | 1.65E-02 | -0.02 | 9.17E-01 |
| <b>PTGIR</b>         | 0.35  | 6.87E-02 | 0.02  | 9.17E-01 |
| <b>PTP4A2</b>        | 0.15  | 4.54E-01 | -0.02 | 9.17E-01 |
| <b>RBM26-AS1</b>     | 0.19  | 3.20E-01 | 0.02  | 9.17E-01 |
| <b>RECQL</b>         | -0.19 | 3.36E-01 | -0.02 | 9.17E-01 |
| <b>RIPPLY3</b>       | 0.14  | 4.68E-01 | -0.02 | 9.17E-01 |
| <b>RN7SL338P</b>     | 0.07  | 7.42E-01 | 0.02  | 9.17E-01 |
| <b>RNU6-1136P</b>    | -0.47 | 1.19E-02 | -0.02 | 9.17E-01 |
| <b>RP1-199J3.7</b>   | -0.20 | 3.07E-01 | 0.02  | 9.17E-01 |
| <b>RP11-180P8.1</b>  | -0.04 | 8.38E-01 | 0.02  | 9.17E-01 |
| <b>RP11-346D19.1</b> | 0.15  | 4.59E-01 | 0.02  | 9.17E-01 |
| <b>RP11-439L18.2</b> | -0.14 | 4.93E-01 | -0.02 | 9.17E-01 |
| <b>RP11-691N7.6</b>  | 0.00  | 9.88E-01 | -0.02 | 9.17E-01 |
| <b>RP11-711M9.2</b>  | -0.04 | 8.43E-01 | 0.02  | 9.17E-01 |
| <b>RP11-712B9.6</b>  | -0.16 | 4.28E-01 | 0.02  | 9.17E-01 |
| <b>RP11-96C23.9</b>  | 0.05  | 7.85E-01 | 0.02  | 9.17E-01 |
| <b>SNORD93</b>       | 0.11  | 5.77E-01 | 0.02  | 9.17E-01 |
| <b>TCF20</b>         | -0.02 | 9.20E-01 | 0.02  | 9.17E-01 |
| <b>U2AF1</b>         | -0.29 | 1.32E-01 | -0.02 | 9.17E-01 |
| <b>VASP</b>          | 0.09  | 6.44E-01 | -0.02 | 9.17E-01 |
| <b>ABCB1</b>         | -0.03 | 8.95E-01 | 0.02  | 9.18E-01 |
| <b>AFAP1L1</b>       | 0.05  | 8.05E-01 | -0.02 | 9.18E-01 |
| <b>C4B</b>           | -0.29 | 1.32E-01 | 0.02  | 9.18E-01 |
| <b>CDK4</b>          | -0.02 | 9.37E-01 | -0.02 | 9.18E-01 |
| <b>CTC-499B15.6</b>  | -0.23 | 2.32E-01 | -0.02 | 9.18E-01 |
| <b>CTC-523E23.4</b>  | 0.02  | 9.08E-01 | -0.02 | 9.18E-01 |
| <b>CTC-559E9.1</b>   | 0.01  | 9.50E-01 | -0.02 | 9.18E-01 |
| <b>CTD-3088G3.6</b>  | -0.19 | 3.31E-01 | 0.02  | 9.18E-01 |
| <b>EAF2</b>          | -0.09 | 6.57E-01 | -0.02 | 9.18E-01 |
| <b>FZD9</b>          | -0.02 | 9.25E-01 | 0.02  | 9.18E-01 |
| <b>G1159</b>         | 0.10  | 6.17E-01 | -0.02 | 9.18E-01 |
| <b>GPR157</b>        | 0.06  | 7.58E-01 | 0.02  | 9.18E-01 |
| <b>IDI2</b>          | 0.00  | 9.88E-01 | -0.02 | 9.18E-01 |
| <b>KIAA1191</b>      | 0.22  | 2.68E-01 | 0.02  | 9.18E-01 |
| <b>MMAA</b>          | 0.26  | 1.88E-01 | -0.02 | 9.18E-01 |
| <b>MT-ND4</b>        | 0.33  | 8.90E-02 | 0.02  | 9.18E-01 |
| <b>P4HA1</b>         | -0.05 | 7.83E-01 | -0.02 | 9.18E-01 |
| <b>PABPN1L</b>       | -0.06 | 7.73E-01 | -0.02 | 9.18E-01 |
| <b>PSMA7</b>         | 0.07  | 7.14E-01 | 0.02  | 9.18E-01 |
| <b>RP11-161H23.9</b> | 0.08  | 6.98E-01 | -0.02 | 9.18E-01 |
| <b>RP11-174O3.3</b>  | -0.39 | 3.82E-02 | -0.02 | 9.18E-01 |
| <b>RP11-178C3.2</b>  | 0.11  | 5.71E-01 | 0.02  | 9.18E-01 |
| <b>RP11-621K7.1</b>  | 0.19  | 3.21E-01 | -0.02 | 9.18E-01 |
| <b>RPL5P24</b>       | 0.08  | 6.74E-01 | -0.02 | 9.18E-01 |
| <b>SRGAP3</b>        | 0.19  | 3.21E-01 | 0.02  | 9.18E-01 |
| <b>TERF1</b>         | -0.17 | 3.98E-01 | 0.02  | 9.18E-01 |
| <b>TMOD1</b>         | -0.35 | 6.77E-02 | 0.02  | 9.18E-01 |

|                |       |          |       |          |
|----------------|-------|----------|-------|----------|
| TOR1AIP2       | 0.12  | 5.56E-01 | 0.02  | 9.18E-01 |
| TSG101         | 0.11  | 5.93E-01 | -0.02 | 9.18E-01 |
| TTBK1          | -0.17 | 3.82E-01 | -0.02 | 9.18E-01 |
| USP6           | -0.08 | 7.02E-01 | 0.02  | 9.18E-01 |
| XLOC_003839    | -0.15 | 4.54E-01 | 0.02  | 9.18E-01 |
| ZBED4          | 0.00  | 9.85E-01 | 0.02  | 9.18E-01 |
| ZNF547         | 0.09  | 6.34E-01 | -0.02 | 9.18E-01 |
| AKR7A2P1       | 0.01  | 9.60E-01 | 0.02  | 9.19E-01 |
| AVEN           | 0.01  | 9.78E-01 | 0.02  | 9.19E-01 |
| BCL2L13        | -0.11 | 5.87E-01 | 0.02  | 9.19E-01 |
| CARD8-AS1      | 0.42  | 2.50E-02 | 0.02  | 9.19E-01 |
| FLJ38576       | 0.06  | 7.51E-01 | 0.02  | 9.19E-01 |
| G12993         | 0.01  | 9.77E-01 | 0.02  | 9.19E-01 |
| G43621         | 0.22  | 2.70E-01 | 0.02  | 9.19E-01 |
| HOXA4          | -0.21 | 2.81E-01 | 0.02  | 9.19E-01 |
| KRTAP19-3      | -0.13 | 5.00E-01 | 0.02  | 9.19E-01 |
| MIR99AHG       | 0.04  | 8.23E-01 | 0.02  | 9.19E-01 |
| NDUFV1         | 0.08  | 6.69E-01 | 0.02  | 9.19E-01 |
| PSMC1          | 0.02  | 9.01E-01 | 0.02  | 9.19E-01 |
| RP11-318E3.9   | 0.02  | 9.08E-01 | 0.02  | 9.19E-01 |
| RP11-438D8.2   | 0.01  | 9.77E-01 | 0.02  | 9.19E-01 |
| RP11-552F3.4   | -0.22 | 2.56E-01 | 0.02  | 9.19E-01 |
| RP11-727F15.12 | 0.19  | 3.22E-01 | 0.02  | 9.19E-01 |
| RPL26P30       | -0.21 | 2.76E-01 | 0.02  | 9.19E-01 |
| SLC16A1        | 0.24  | 2.13E-01 | 0.02  | 9.19E-01 |
| TPTEP1         | 0.01  | 9.71E-01 | 0.02  | 9.19E-01 |
| CHCHD4P4       | -0.28 | 1.55E-01 | -0.02 | 9.19E-01 |
| CLECL1         | -0.05 | 7.95E-01 | -0.02 | 9.19E-01 |
| CMB9-94B1.2    | 0.31  | 1.07E-01 | -0.02 | 9.19E-01 |
| COX16          | 0.01  | 9.64E-01 | -0.02 | 9.19E-01 |
| ITIH6          | 0.14  | 4.68E-01 | -0.02 | 9.19E-01 |
| LRRK2          | 0.23  | 2.32E-01 | -0.02 | 9.19E-01 |
| MARK3P1        | -0.18 | 3.48E-01 | -0.02 | 9.19E-01 |
| MFAP5          | -0.14 | 4.84E-01 | -0.02 | 9.19E-01 |
| MTCO3P11       | -0.02 | 9.17E-01 | -0.02 | 9.19E-01 |
| NCAPG2         | -0.15 | 4.37E-01 | -0.02 | 9.19E-01 |
| NPAS3          | -0.24 | 2.18E-01 | -0.02 | 9.19E-01 |
| PRIM2          | -0.23 | 2.33E-01 | -0.02 | 9.19E-01 |
| RNU6-523P      | -0.29 | 1.37E-01 | -0.02 | 9.19E-01 |
| RP11-177N22.2  | -0.23 | 2.49E-01 | -0.02 | 9.19E-01 |
| RP13-631K18.3  | -0.01 | 9.74E-01 | -0.02 | 9.19E-01 |
| RP5-1057I20.5  | -0.08 | 6.94E-01 | -0.02 | 9.19E-01 |
| XLOC_000697    | -0.30 | 1.15E-01 | -0.02 | 9.19E-01 |
| ZSCAN12        | 0.32  | 9.93E-02 | -0.02 | 9.19E-01 |
| APC2           | 0.10  | 6.05E-01 | -0.02 | 9.21E-01 |
| CD164          | 0.18  | 3.46E-01 | -0.02 | 9.21E-01 |
| CROCCP2        | 0.00  | 9.85E-01 | -0.02 | 9.21E-01 |

|                |       |          |       |          |
|----------------|-------|----------|-------|----------|
| CTD-2384B11.2  | -0.08 | 6.93E-01 | 0.02  | 9.21E-01 |
| CTD-2542L18.1  | -0.07 | 7.39E-01 | -0.02 | 9.21E-01 |
| CTD-3037G24.4  | 0.17  | 3.83E-01 | -0.02 | 9.21E-01 |
| CXCL5          | 0.04  | 8.53E-01 | -0.02 | 9.21E-01 |
| DHFR           | -0.01 | 9.48E-01 | -0.02 | 9.21E-01 |
| DNAJC11        | 0.14  | 4.86E-01 | 0.02  | 9.21E-01 |
| DNM1           | -0.36 | 5.96E-02 | 0.02  | 9.21E-01 |
| FIZ1           | 0.21  | 2.85E-01 | 0.02  | 9.21E-01 |
| G13548         | -0.15 | 4.41E-01 | -0.02 | 9.21E-01 |
| G7468          | -0.06 | 7.43E-01 | 0.02  | 9.21E-01 |
| GAL3ST4        | 0.07  | 7.30E-01 | -0.02 | 9.21E-01 |
| HINT2          | 0.22  | 2.62E-01 | 0.02  | 9.21E-01 |
| ITIH2          | -0.09 | 6.65E-01 | 0.02  | 9.21E-01 |
| KB-226F1.2     | 0.16  | 4.23E-01 | 0.02  | 9.21E-01 |
| KLHL11         | 0.14  | 4.77E-01 | 0.02  | 9.21E-01 |
| KRTAP19-5      | -0.18 | 3.68E-01 | -0.02 | 9.21E-01 |
| MSC            | -0.16 | 4.18E-01 | -0.02 | 9.21E-01 |
| PSMG1          | 0.18  | 3.66E-01 | -0.02 | 9.21E-01 |
| RAD23A         | 0.14  | 4.93E-01 | 0.02  | 9.21E-01 |
| RNU1-88P       | -0.23 | 2.48E-01 | -0.02 | 9.21E-01 |
| RP11-319G9.1   | -0.14 | 4.79E-01 | -0.02 | 9.21E-01 |
| RP11-360D2.2   | -0.02 | 9.24E-01 | 0.02  | 9.21E-01 |
| RP11-405M12.3  | 0.19  | 3.43E-01 | 0.02  | 9.21E-01 |
| RP11-63P12.7   | 0.19  | 3.32E-01 | -0.02 | 9.21E-01 |
| SEC16A         | -0.11 | 5.83E-01 | -0.02 | 9.21E-01 |
| SKP1           | 0.13  | 5.24E-01 | 0.02  | 9.21E-01 |
| SMARCB1        | 0.27  | 1.64E-01 | 0.02  | 9.21E-01 |
| SNRPA1         | -0.16 | 4.18E-01 | 0.02  | 9.21E-01 |
| TBCD           | -0.13 | 5.09E-01 | -0.02 | 9.21E-01 |
| TBX20          | -0.12 | 5.31E-01 | -0.02 | 9.21E-01 |
| TMEM223        | 0.08  | 6.77E-01 | -0.02 | 9.21E-01 |
| TMX3           | 0.17  | 4.01E-01 | -0.02 | 9.21E-01 |
| TOMM22         | 0.03  | 8.98E-01 | -0.02 | 9.21E-01 |
| TRAJ38         | 0.06  | 7.61E-01 | 0.02  | 9.21E-01 |
| UVSSA          | 0.00  | 9.94E-01 | -0.02 | 9.21E-01 |
| XLOC_005574    | 0.03  | 8.99E-01 | 0.02  | 9.21E-01 |
| ZDHC18         | 0.14  | 4.78E-01 | 0.02  | 9.21E-01 |
| ZFPM2          | -0.30 | 1.17E-01 | -0.02 | 9.21E-01 |
| AC005237.4     | 0.02  | 9.10E-01 | -0.02 | 9.22E-01 |
| AC083884.8     | 0.06  | 7.81E-01 | 0.02  | 9.22E-01 |
| ACBD4          | -0.21 | 2.83E-01 | 0.02  | 9.22E-01 |
| AL133262.1     | 0.27  | 1.63E-01 | 0.02  | 9.22E-01 |
| AP001469.9     | -0.32 | 9.96E-02 | 0.02  | 9.22E-01 |
| CD180          | -0.22 | 2.54E-01 | 0.02  | 9.22E-01 |
| CPSF3          | 0.19  | 3.45E-01 | 0.02  | 9.22E-01 |
| CTB-139P11.2   | 0.09  | 6.55E-01 | 0.02  | 9.22E-01 |
| CTD-2349P21.12 | 0.24  | 2.14E-01 | 0.02  | 9.22E-01 |

|                       |       |          |       |          |
|-----------------------|-------|----------|-------|----------|
| <b>DKFZp779M0652</b>  | 0.21  | 2.83E-01 | -0.02 | 9.22E-01 |
| <b>G40866</b>         | -0.09 | 6.67E-01 | -0.02 | 9.22E-01 |
| <b>KLF3-AS1</b>       | -0.20 | 3.07E-01 | -0.02 | 9.22E-01 |
| <b>KLHL7-AS1</b>      | -0.26 | 1.87E-01 | 0.02  | 9.22E-01 |
| <b>LINC01362</b>      | 0.13  | 5.03E-01 | 0.02  | 9.22E-01 |
| <b>MIR30B</b>         | -0.02 | 9.11E-01 | 0.02  | 9.22E-01 |
| <b>MIR3687</b>        | 0.14  | 4.72E-01 | -0.02 | 9.22E-01 |
| <b>MRPL51</b>         | 0.04  | 8.25E-01 | 0.02  | 9.22E-01 |
| <b>NAV2-AS4</b>       | -0.42 | 2.81E-02 | 0.02  | 9.22E-01 |
| <b>NDFIP1</b>         | -0.19 | 3.36E-01 | 0.02  | 9.22E-01 |
| <b>NEURL2</b>         | 0.08  | 6.68E-01 | -0.02 | 9.22E-01 |
| <b>PAPLN</b>          | -0.23 | 2.35E-01 | 0.02  | 9.22E-01 |
| <b>PCDHGB2</b>        | -0.08 | 6.96E-01 | -0.02 | 9.22E-01 |
| <b>PDCD4-AS1</b>      | 0.13  | 5.19E-01 | -0.02 | 9.22E-01 |
| <b>PRPF6</b>          | -0.11 | 5.83E-01 | 0.02  | 9.22E-01 |
| <b>PTGES3P1</b>       | 0.08  | 7.02E-01 | 0.02  | 9.22E-01 |
| <b>RARA-AS1</b>       | -0.08 | 6.93E-01 | -0.02 | 9.22E-01 |
| <b>RCC1</b>           | 0.16  | 4.17E-01 | -0.02 | 9.22E-01 |
| <b>RN7SL233P</b>      | -0.20 | 3.19E-01 | 0.02  | 9.22E-01 |
| <b>RNU6-103P</b>      | -0.14 | 4.88E-01 | -0.02 | 9.22E-01 |
| <b>RP11-1084A12.1</b> | -0.13 | 5.12E-01 | -0.02 | 9.22E-01 |
| <b>RP11-413E1.2</b>   | -0.28 | 1.54E-01 | 0.02  | 9.22E-01 |
| <b>RP11-530C5.1</b>   | -0.04 | 8.44E-01 | -0.02 | 9.22E-01 |
| <b>RP11-71E19.1</b>   | -0.11 | 5.87E-01 | 0.02  | 9.22E-01 |
| <b>RP11-788M5.4</b>   | -0.07 | 7.22E-01 | 0.02  | 9.22E-01 |
| <b>RP11-95P2.3</b>    | -0.22 | 2.53E-01 | -0.02 | 9.22E-01 |
| <b>RPL17P25</b>       | -0.08 | 6.92E-01 | -0.02 | 9.22E-01 |
| <b>RPL7P11</b>        | -0.30 | 1.16E-01 | -0.02 | 9.22E-01 |
| <b>SCN8A</b>          | -0.15 | 4.44E-01 | -0.02 | 9.22E-01 |
| <b>SMC4</b>           | -0.02 | 9.35E-01 | 0.02  | 9.22E-01 |
| <b>SNRNP200</b>       | -0.04 | 8.31E-01 | -0.02 | 9.22E-01 |
| <b>TEX2</b>           | 0.03  | 8.78E-01 | 0.02  | 9.22E-01 |
| <b>TUBB</b>           | 0.13  | 4.93E-01 | 0.02  | 9.22E-01 |
| <b>TXNL1</b>          | 0.18  | 3.66E-01 | 0.02  | 9.22E-01 |
| <b>UNG</b>            | 0.03  | 8.90E-01 | -0.02 | 9.22E-01 |
| <b>UQCC2</b>          | -0.03 | 8.73E-01 | -0.02 | 9.22E-01 |
| <b>VCAN</b>           | -0.28 | 1.46E-01 | 0.02  | 9.22E-01 |
| <b>VPS13D</b>         | -0.23 | 2.41E-01 | -0.02 | 9.22E-01 |
| <b>WDPCP</b>          | -0.33 | 8.16E-02 | -0.02 | 9.22E-01 |
| <b>ZNF318</b>         | 0.03  | 8.91E-01 | 0.02  | 9.22E-01 |
| <b>ZNF623</b>         | 0.11  | 5.64E-01 | -0.02 | 9.22E-01 |
| <b>ADAMTS7P3</b>      | 0.05  | 7.84E-01 | -0.02 | 9.23E-01 |
| <b>ANO4</b>           | -0.06 | 7.72E-01 | 0.02  | 9.23E-01 |
| <b>AP000563.2</b>     | -0.24 | 2.23E-01 | -0.02 | 9.23E-01 |
| <b>ASPM</b>           | 0.04  | 8.35E-01 | 0.02  | 9.23E-01 |
| <b>CASP5</b>          | 0.29  | 1.37E-01 | -0.02 | 9.23E-01 |
| <b>CCDC85B</b>        | -0.15 | 4.55E-01 | -0.02 | 9.23E-01 |

|               |       |          |       |          |
|---------------|-------|----------|-------|----------|
| CHRD1         | -0.12 | 5.39E-01 | 0.02  | 9.23E-01 |
| CLP1          | 0.04  | 8.23E-01 | -0.02 | 9.23E-01 |
| CTC-398G3.1   | -0.03 | 8.79E-01 | -0.02 | 9.23E-01 |
| CXorf23       | -0.35 | 7.08E-02 | -0.02 | 9.23E-01 |
| DUSP5         | 0.37  | 5.37E-02 | 0.02  | 9.23E-01 |
| F2RL3         | -0.13 | 5.07E-01 | -0.02 | 9.23E-01 |
| G12890        | 0.12  | 5.51E-01 | 0.02  | 9.23E-01 |
| G8415         | 0.03  | 8.88E-01 | -0.02 | 9.23E-01 |
| GOLGA5        | 0.12  | 5.28E-01 | -0.02 | 9.23E-01 |
| MROH9         | 0.15  | 4.61E-01 | 0.02  | 9.23E-01 |
| NACA          | -0.06 | 7.43E-01 | 0.02  | 9.23E-01 |
| PGM5P3-AS1    | -0.17 | 3.78E-01 | 0.02  | 9.23E-01 |
| RP1-161P9.5   | 0.01  | 9.40E-01 | 0.02  | 9.23E-01 |
| RP11-10J21.4  | -0.37 | 5.12E-02 | -0.02 | 9.23E-01 |
| RP11-138E2.1  | -0.06 | 7.72E-01 | 0.02  | 9.23E-01 |
| RP11-333E13.4 | 0.18  | 3.60E-01 | 0.02  | 9.23E-01 |
| RP11-378J18.6 | 0.01  | 9.69E-01 | 0.02  | 9.23E-01 |
| RP11-417N10.5 | -0.05 | 8.19E-01 | -0.02 | 9.23E-01 |
| RP11-445J14.1 | -0.03 | 8.79E-01 | -0.02 | 9.23E-01 |
| RP3-512E2.2   | -0.42 | 2.80E-02 | -0.02 | 9.23E-01 |
| RRP1B         | 0.14  | 4.93E-01 | 0.02  | 9.23E-01 |
| RTP3          | -0.17 | 3.79E-01 | 0.02  | 9.23E-01 |
| SAR1A         | 0.00  | 9.86E-01 | -0.02 | 9.23E-01 |
| SLC5A10       | -0.12 | 5.31E-01 | 0.02  | 9.23E-01 |
| TMBIM6        | 0.26  | 1.81E-01 | 0.02  | 9.23E-01 |
| TRAJ28        | -0.04 | 8.36E-01 | -0.02 | 9.23E-01 |
| TUBB4BP2      | -0.10 | 6.09E-01 | -0.02 | 9.23E-01 |
| C10orf91      | -0.27 | 1.65E-01 | 0.02  | 9.24E-01 |
| CISD3         | 0.01  | 9.54E-01 | 0.02  | 9.24E-01 |
| CLUAP1        | 0.09  | 6.53E-01 | 0.02  | 9.24E-01 |
| DDX23         | 0.02  | 9.24E-01 | 0.02  | 9.24E-01 |
| FAM101B       | 0.06  | 7.68E-01 | -0.02 | 9.24E-01 |
| G34551        | 0.34  | 7.59E-02 | 0.02  | 9.24E-01 |
| HEXDC-IT1     | -0.19 | 3.27E-01 | 0.02  | 9.24E-01 |
| KRT3          | -0.05 | 8.03E-01 | 0.02  | 9.24E-01 |
| LINC00908     | 0.06  | 7.52E-01 | 0.02  | 9.24E-01 |
| LINC01176     | -0.13 | 5.26E-01 | -0.02 | 9.24E-01 |
| LMO7          | 0.05  | 8.19E-01 | -0.02 | 9.24E-01 |
| MIR548K       | 0.06  | 7.57E-01 | -0.02 | 9.24E-01 |
| MT1X          | 0.08  | 6.71E-01 | -0.02 | 9.24E-01 |
| NEXN          | -0.03 | 8.98E-01 | -0.02 | 9.24E-01 |
| PNMA1         | -0.08 | 6.85E-01 | -0.02 | 9.24E-01 |
| PRELID3B      | 0.22  | 2.70E-01 | 0.02  | 9.24E-01 |
| RP11-14I17.1  | -0.25 | 2.03E-01 | 0.02  | 9.24E-01 |
| RP11-243J16.7 | 0.20  | 3.12E-01 | 0.02  | 9.24E-01 |
| RP11-258C19.4 | 0.01  | 9.50E-01 | -0.02 | 9.24E-01 |
| RP11-57B24.2  | -0.16 | 4.23E-01 | 0.02  | 9.24E-01 |



|                |       |          |       |          |
|----------------|-------|----------|-------|----------|
| RP11-63I8.1    | -0.03 | 8.66E-01 | 0.02  | 9.24E-01 |
| RP11-82O19.2   | -0.10 | 6.17E-01 | 0.02  | 9.24E-01 |
| RP4-614O4.11   | 0.02  | 9.02E-01 | 0.02  | 9.24E-01 |
| RP5-1065J22.2  | -0.26 | 1.77E-01 | 0.02  | 9.24E-01 |
| RPL23P2        | -0.16 | 4.15E-01 | 0.02  | 9.24E-01 |
| RPSAP69        | 0.08  | 6.73E-01 | -0.02 | 9.24E-01 |
| SNORD116-8     | -0.16 | 4.04E-01 | 0.02  | 9.24E-01 |
| SPATC1         | -0.12 | 5.41E-01 | 0.02  | 9.24E-01 |
| TMEM88         | 0.12  | 5.34E-01 | 0.02  | 9.24E-01 |
| TSTD3          | -0.30 | 1.23E-01 | -0.02 | 9.24E-01 |
| AC011330.5     | -0.28 | 1.51E-01 | 0.02  | 9.25E-01 |
| AF011889.5     | -0.07 | 7.35E-01 | 0.02  | 9.25E-01 |
| ANXA8L1        | 0.02  | 9.22E-01 | 0.02  | 9.25E-01 |
| BLZF1          | 0.41  | 2.97E-02 | 0.02  | 9.25E-01 |
| CBLN3          | -0.23 | 2.43E-01 | 0.02  | 9.25E-01 |
| CREM           | 0.03  | 8.79E-01 | 0.02  | 9.25E-01 |
| CTD-2568A17.8  | 0.29  | 1.41E-01 | 0.02  | 9.25E-01 |
| CXorf40A       | 0.08  | 6.72E-01 | 0.02  | 9.25E-01 |
| MGST3          | -0.04 | 8.31E-01 | 0.02  | 9.25E-01 |
| MIR5581        | -0.07 | 7.37E-01 | 0.02  | 9.25E-01 |
| MIRLET7D       | 0.03  | 8.63E-01 | 0.02  | 9.25E-01 |
| PLAC1          | -0.13 | 5.26E-01 | 0.02  | 9.25E-01 |
| PSMB6          | 0.03  | 8.63E-01 | 0.02  | 9.25E-01 |
| PTPN4          | 0.08  | 6.99E-01 | 0.02  | 9.25E-01 |
| RAP1B          | 0.06  | 7.81E-01 | 0.02  | 9.25E-01 |
| RP1-29C18.8    | 0.20  | 3.05E-01 | 0.02  | 9.25E-01 |
| RP11-271K11.5  | -0.02 | 9.26E-01 | 0.02  | 9.25E-01 |
| RP11-390B4.3   | -0.08 | 6.73E-01 | 0.02  | 9.25E-01 |
| RP11-422P24.12 | -0.06 | 7.71E-01 | 0.02  | 9.25E-01 |
| ST13P6         | -0.05 | 8.08E-01 | 0.02  | 9.25E-01 |
| AC061992.2     | -0.08 | 6.94E-01 | -0.02 | 9.25E-01 |
| ADPRM          | 0.02  | 9.13E-01 | -0.02 | 9.25E-01 |
| ARHGAP20       | -0.24 | 2.15E-01 | -0.02 | 9.25E-01 |
| C11orf65       | -0.29 | 1.29E-01 | -0.02 | 9.25E-01 |
| CTB-25B13.5    | -0.26 | 1.74E-01 | -0.02 | 9.25E-01 |
| DTNBP1         | -0.04 | 8.53E-01 | -0.02 | 9.25E-01 |
| LAMB1          | -0.01 | 9.68E-01 | -0.02 | 9.25E-01 |
| LAMTOR3        | -0.06 | 7.55E-01 | -0.02 | 9.25E-01 |
| NCOR1          | 0.00  | 9.89E-01 | -0.02 | 9.25E-01 |
| RP1-228P16.1   | -0.09 | 6.66E-01 | -0.02 | 9.25E-01 |
| RP11-11M20.2   | -0.16 | 4.21E-01 | -0.02 | 9.25E-01 |
| RP11-133K1.8   | 0.39  | 4.01E-02 | -0.02 | 9.25E-01 |
| RP11-286N22.14 | -0.16 | 4.03E-01 | -0.02 | 9.25E-01 |
| RP11-452K12.6  | 0.03  | 8.81E-01 | -0.02 | 9.25E-01 |
| RP11-458D21.1  | -0.38 | 4.41E-02 | -0.02 | 9.25E-01 |
| RP5-849H19.2   | -0.01 | 9.53E-01 | -0.02 | 9.25E-01 |
| RRAS2          | 0.08  | 6.85E-01 | -0.02 | 9.25E-01 |

|               |       |          |       |          |
|---------------|-------|----------|-------|----------|
| TM2D2         | -0.02 | 9.26E-01 | -0.02 | 9.25E-01 |
| ZNF395        | -0.01 | 9.75E-01 | -0.02 | 9.25E-01 |
| AC114812.5    | -0.20 | 3.07E-01 | 0.02  | 9.27E-01 |
| AC138035.2    | 0.12  | 5.54E-01 | 0.02  | 9.27E-01 |
| AP001619.3    | -0.29 | 1.28E-01 | 0.02  | 9.27E-01 |
| C5orf56       | -0.07 | 7.06E-01 | 0.02  | 9.27E-01 |
| CTD-2035E11.4 | 0.34  | 7.79E-02 | 0.02  | 9.27E-01 |
| HIST1H3H      | -0.09 | 6.38E-01 | 0.02  | 9.27E-01 |
| ITGA8         | 0.09  | 6.60E-01 | 0.02  | 9.27E-01 |
| KRTAP2-1      | -0.38 | 4.46E-02 | 0.02  | 9.27E-01 |
| MAP2K5        | -0.14 | 4.69E-01 | 0.02  | 9.27E-01 |
| MIS18A        | 0.05  | 7.93E-01 | 0.02  | 9.27E-01 |
| NEURL4        | -0.08 | 6.94E-01 | 0.02  | 9.27E-01 |
| NTAN1P2       | 0.05  | 7.88E-01 | 0.02  | 9.27E-01 |
| ODCP          | 0.13  | 5.10E-01 | 0.02  | 9.27E-01 |
| OLA1P1        | -0.04 | 8.55E-01 | 0.02  | 9.27E-01 |
| RMI1          | 0.13  | 5.18E-01 | 0.02  | 9.27E-01 |
| SAMD14        | -0.25 | 1.93E-01 | 0.02  | 9.27E-01 |
| ZSWIM5        | -0.38 | 4.71E-02 | 0.02  | 9.27E-01 |
| ABHD18        | 0.25  | 2.02E-01 | -0.02 | 9.27E-01 |
| AC005154.6    | 0.05  | 8.09E-01 | -0.02 | 9.27E-01 |
| AC005682.5    | 0.06  | 7.76E-01 | -0.02 | 9.27E-01 |
| AC012360.6    | -0.13 | 5.18E-01 | -0.02 | 9.27E-01 |
| EBF2          | 0.02  | 9.06E-01 | -0.02 | 9.27E-01 |
| FOXD2         | 0.42  | 2.56E-02 | -0.02 | 9.27E-01 |
| GSG2          | -0.11 | 5.67E-01 | -0.02 | 9.27E-01 |
| GTF3A         | -0.13 | 5.14E-01 | -0.02 | 9.27E-01 |
| PRR34         | 0.07  | 7.06E-01 | -0.02 | 9.27E-01 |
| RNF219        | -0.18 | 3.52E-01 | -0.02 | 9.27E-01 |
| RP11-425M5.7  | -0.35 | 7.12E-02 | -0.02 | 9.27E-01 |
| RP11-490B18.6 | -0.13 | 5.10E-01 | -0.02 | 9.27E-01 |
| RP11-54C4.3   | 0.01  | 9.48E-01 | -0.02 | 9.27E-01 |
| RP11-673E1.3  | 0.02  | 9.13E-01 | -0.02 | 9.27E-01 |
| RP4-673D20.6  | -0.28 | 1.56E-01 | -0.02 | 9.27E-01 |
| S1PR1         | -0.01 | 9.55E-01 | -0.02 | 9.27E-01 |
| SCAF8         | -0.17 | 3.95E-01 | -0.02 | 9.27E-01 |
| TMEM38A       | -0.04 | 8.29E-01 | -0.02 | 9.27E-01 |
| ZCCHC10       | 0.23  | 2.45E-01 | -0.02 | 9.27E-01 |
| AC132008.1    | -0.01 | 9.70E-01 | -0.02 | 9.28E-01 |
| AL160291.1    | -0.09 | 6.66E-01 | -0.02 | 9.28E-01 |
| CNST          | 0.15  | 4.44E-01 | -0.02 | 9.28E-01 |
| CTD-2315M5.2  | -0.02 | 9.10E-01 | -0.02 | 9.28E-01 |
| CYCS          | 0.23  | 2.41E-01 | -0.02 | 9.28E-01 |
| G2077         | -0.03 | 8.85E-01 | -0.02 | 9.28E-01 |
| GNAI3         | 0.01  | 9.55E-01 | -0.02 | 9.28E-01 |
| HTR3B         | -0.01 | 9.51E-01 | -0.02 | 9.28E-01 |
| LINC01375     | -0.17 | 3.76E-01 | -0.02 | 9.28E-01 |

|                |       |          |       |          |
|----------------|-------|----------|-------|----------|
| LINC01558      | -0.20 | 3.11E-01 | -0.02 | 9.28E-01 |
| MT1G           | 0.07  | 7.42E-01 | -0.02 | 9.28E-01 |
| PDZD11         | 0.03  | 8.87E-01 | -0.02 | 9.28E-01 |
| RP11-187C18.2  | 0.08  | 6.87E-01 | -0.02 | 9.28E-01 |
| RP11-494M8.1   | -0.30 | 1.23E-01 | -0.02 | 9.28E-01 |
| RP11-756P10.6  | 0.15  | 4.54E-01 | -0.02 | 9.28E-01 |
| CCDC86         | 0.22  | 2.58E-01 | 0.02  | 9.28E-01 |
| CTD-2083E4.5   | 0.20  | 3.05E-01 | 0.02  | 9.28E-01 |
| CTD-2574D22.3  | 0.01  | 9.46E-01 | 0.02  | 9.28E-01 |
| DAB2IP         | 0.18  | 3.46E-01 | 0.02  | 9.28E-01 |
| DENND4B        | 0.01  | 9.76E-01 | 0.02  | 9.28E-01 |
| KIAA1324       | -0.03 | 8.64E-01 | 0.02  | 9.28E-01 |
| MB21D2         | 0.35  | 6.82E-02 | 0.02  | 9.28E-01 |
| MFN2           | 0.13  | 5.10E-01 | 0.02  | 9.28E-01 |
| PTBP1          | 0.12  | 5.37E-01 | 0.02  | 9.28E-01 |
| PTRH1          | -0.27 | 1.69E-01 | 0.02  | 9.28E-01 |
| RAB5B          | 0.01  | 9.48E-01 | 0.02  | 9.28E-01 |
| RERE           | 0.08  | 7.03E-01 | 0.02  | 9.28E-01 |
| RNU6-260P      | 0.01  | 9.68E-01 | 0.02  | 9.28E-01 |
| RP11-133K1.7   | 0.13  | 5.01E-01 | 0.02  | 9.28E-01 |
| RP11-143J12.3  | -0.14 | 4.80E-01 | 0.02  | 9.28E-01 |
| RP11-360N9.3   | 0.10  | 5.98E-01 | 0.02  | 9.28E-01 |
| RP11-50B3.4    | -0.21 | 2.80E-01 | 0.02  | 9.28E-01 |
| RPL23AP66      | -0.02 | 9.20E-01 | 0.02  | 9.28E-01 |
| SIMC1          | -0.14 | 4.82E-01 | 0.02  | 9.28E-01 |
| STK24          | 0.29  | 1.35E-01 | 0.02  | 9.28E-01 |
| TPI1P1         | -0.01 | 9.60E-01 | 0.02  | 9.28E-01 |
| XBP1           | 0.23  | 2.42E-01 | 0.02  | 9.28E-01 |
| XLOC_007047    | -0.10 | 6.02E-01 | 0.02  | 9.28E-01 |
| XLOC_008756    | -0.04 | 8.44E-01 | 0.02  | 9.28E-01 |
| XLOC_013591    | -0.03 | 8.81E-01 | 0.02  | 9.28E-01 |
| AC016995.3     | 0.05  | 8.00E-01 | 0.02  | 9.29E-01 |
| AC034220.3     | -0.55 | 2.18E-03 | -0.02 | 9.29E-01 |
| ADAM33         | -0.23 | 2.48E-01 | 0.02  | 9.29E-01 |
| AF213884.2     | 0.22  | 2.67E-01 | -0.02 | 9.29E-01 |
| ANTXR2         | -0.15 | 4.34E-01 | -0.02 | 9.29E-01 |
| ARMCX5-GPRASP2 | -0.13 | 5.00E-01 | -0.02 | 9.29E-01 |
| BTN1A1         | -0.12 | 5.45E-01 | 0.02  | 9.29E-01 |
| CCDC88A        | 0.01  | 9.42E-01 | -0.02 | 9.29E-01 |
| CTC-338M12.4   | -0.02 | 9.37E-01 | -0.02 | 9.29E-01 |
| CYBA           | 0.25  | 1.98E-01 | 0.02  | 9.29E-01 |
| DTX3           | 0.14  | 4.89E-01 | -0.02 | 9.29E-01 |
| FADD           | 0.31  | 1.12E-01 | -0.02 | 9.29E-01 |
| FCGRT          | -0.08 | 6.93E-01 | 0.02  | 9.29E-01 |
| G16028         | -0.04 | 8.37E-01 | 0.02  | 9.29E-01 |
| G8455          | -0.14 | 4.76E-01 | 0.02  | 9.29E-01 |
| GABPB2         | -0.15 | 4.36E-01 | 0.02  | 9.29E-01 |

|                        |       |          |       |          |
|------------------------|-------|----------|-------|----------|
| <b>GBA3</b>            | -0.27 | 1.72E-01 | -0.02 | 9.29E-01 |
| <b>GOLGA6L4</b>        | 0.11  | 5.64E-01 | -0.02 | 9.29E-01 |
| <b>KRTAP17-1</b>       | -0.22 | 2.69E-01 | 0.02  | 9.29E-01 |
| <b>LOX</b>             | 0.22  | 2.53E-01 | 0.02  | 9.29E-01 |
| <b>MLYCD</b>           | 0.19  | 3.29E-01 | 0.02  | 9.29E-01 |
| <b>NPM1P43</b>         | 0.24  | 2.14E-01 | -0.02 | 9.29E-01 |
| <b>OR1K1</b>           | -0.22 | 2.51E-01 | -0.02 | 9.29E-01 |
| <b>PEBP1P3</b>         | 0.05  | 8.14E-01 | -0.02 | 9.29E-01 |
| <b>PPP2R5C</b>         | 0.05  | 7.94E-01 | 0.02  | 9.29E-01 |
| <b>PRDX2P1</b>         | 0.04  | 8.38E-01 | 0.02  | 9.29E-01 |
| <b>RP11-315O6.1</b>    | -0.17 | 3.85E-01 | -0.02 | 9.29E-01 |
| <b>RP11-385F7.1</b>    | -0.12 | 5.48E-01 | 0.02  | 9.29E-01 |
| <b>RP11-53O19.2</b>    | -0.11 | 5.89E-01 | -0.02 | 9.29E-01 |
| <b>RP11-706O15.7</b>   | 0.34  | 7.82E-02 | -0.02 | 9.29E-01 |
| <b>RP11-73E6.2</b>     | 0.00  | 9.97E-01 | 0.02  | 9.29E-01 |
| <b>RP5-857K21.4</b>    | 0.15  | 4.51E-01 | -0.02 | 9.29E-01 |
| <b>RPS18</b>           | 0.26  | 1.73E-01 | 0.02  | 9.29E-01 |
| <b>RPS3AP6</b>         | -0.14 | 4.93E-01 | -0.02 | 9.29E-01 |
| <b>SNX24</b>           | 0.21  | 2.90E-01 | -0.02 | 9.29E-01 |
| <b>TTLL3</b>           | -0.12 | 5.41E-01 | -0.02 | 9.29E-01 |
| <b>AC005785.5</b>      | -0.09 | 6.34E-01 | 0.02  | 9.30E-01 |
| <b>ANKHD1-EIF4EBP3</b> | -0.07 | 7.19E-01 | 0.02  | 9.30E-01 |
| <b>CLDN34</b>          | 0.08  | 7.02E-01 | 0.02  | 9.30E-01 |
| <b>CTD-2022H16.3</b>   | 0.01  | 9.47E-01 | 0.02  | 9.30E-01 |
| <b>CTD-2561B21.11</b>  | 0.02  | 9.02E-01 | 0.02  | 9.30E-01 |
| <b>DPYD-AS2</b>        | -0.10 | 6.19E-01 | 0.02  | 9.30E-01 |
| <b>G38913</b>          | -0.31 | 1.06E-01 | 0.02  | 9.30E-01 |
| <b>G3899</b>           | -0.28 | 1.44E-01 | 0.02  | 9.30E-01 |
| <b>HIST2H2AB</b>       | 0.08  | 7.04E-01 | 0.02  | 9.30E-01 |
| <b>KIF5A</b>           | 0.13  | 5.17E-01 | 0.02  | 9.30E-01 |
| <b>NUTF2</b>           | 0.20  | 3.02E-01 | 0.02  | 9.30E-01 |
| <b>PELI1</b>           | 0.07  | 7.09E-01 | 0.02  | 9.30E-01 |
| <b>RNU6-1209P</b>      | -0.09 | 6.55E-01 | 0.02  | 9.30E-01 |
| <b>RP11-253M7.3</b>    | 0.27  | 1.61E-01 | 0.02  | 9.30E-01 |
| <b>RP11-270M14.1</b>   | -0.18 | 3.63E-01 | 0.02  | 9.30E-01 |
| <b>RP11-391M7.3</b>    | -0.11 | 5.70E-01 | 0.02  | 9.30E-01 |
| <b>RP11-641C17.1</b>   | 0.04  | 8.37E-01 | 0.02  | 9.30E-01 |
| <b>RP11-680F20.10</b>  | -0.09 | 6.54E-01 | 0.02  | 9.30E-01 |
| <b>RP3-453C12.15</b>   | 0.01  | 9.78E-01 | 0.02  | 9.30E-01 |
| <b>SCFD2</b>           | 0.19  | 3.26E-01 | 0.02  | 9.30E-01 |
| <b>SLC39A14</b>        | -0.17 | 3.98E-01 | 0.02  | 9.30E-01 |
| <b>TRIM8</b>           | -0.08 | 7.02E-01 | 0.02  | 9.30E-01 |
| <b>AL662800.1</b>      | -0.07 | 7.37E-01 | -0.02 | 9.30E-01 |
| <b>FAM135A</b>         | -0.01 | 9.67E-01 | -0.02 | 9.30E-01 |
| <b>FAXC</b>            | 0.28  | 1.42E-01 | -0.02 | 9.30E-01 |
| <b>GRIN2D</b>          | -0.01 | 9.50E-01 | -0.02 | 9.30E-01 |
| <b>HIST2H2BE</b>       | -0.02 | 9.38E-01 | -0.02 | 9.30E-01 |

|                       |       |          |       |          |
|-----------------------|-------|----------|-------|----------|
| <b>PALM3</b>          | -0.29 | 1.35E-01 | -0.02 | 9.30E-01 |
| <b>RP11-114F10.3</b>  | 0.10  | 5.96E-01 | -0.02 | 9.30E-01 |
| <b>RP11-286N3.1</b>   | 0.17  | 4.00E-01 | -0.02 | 9.30E-01 |
| <b>RP11-665C16.6</b>  | -0.17 | 3.76E-01 | -0.02 | 9.30E-01 |
| <b>TSHR</b>           | -0.20 | 3.09E-01 | -0.02 | 9.30E-01 |
| <b>AC011243.1</b>     | 0.18  | 3.49E-01 | -0.02 | 9.31E-01 |
| <b>AC018804.1</b>     | 0.04  | 8.44E-01 | -0.02 | 9.31E-01 |
| <b>AC137932.5</b>     | -0.15 | 4.34E-01 | -0.02 | 9.31E-01 |
| <b>ATP5F1</b>         | 0.08  | 6.91E-01 | -0.02 | 9.31E-01 |
| <b>ATP8A2</b>         | -0.14 | 4.93E-01 | -0.02 | 9.31E-01 |
| <b>COL15A1</b>        | -0.20 | 3.05E-01 | -0.02 | 9.31E-01 |
| <b>CTD-2619J13.8</b>  | 0.11  | 5.64E-01 | -0.02 | 9.31E-01 |
| <b>DERL2</b>          | -0.29 | 1.35E-01 | -0.02 | 9.31E-01 |
| <b>IARS</b>           | 0.06  | 7.64E-01 | -0.02 | 9.31E-01 |
| <b>IL23R</b>          | 0.35  | 6.48E-02 | -0.02 | 9.31E-01 |
| <b>LYRM4</b>          | -0.10 | 5.99E-01 | -0.02 | 9.31E-01 |
| <b>MRPS15</b>         | 0.16  | 4.08E-01 | -0.02 | 9.31E-01 |
| <b>MYL12B</b>         | 0.06  | 7.61E-01 | -0.02 | 9.31E-01 |
| <b>RN7SL168P</b>      | -0.11 | 5.61E-01 | -0.02 | 9.31E-01 |
| <b>RP11-196G11.6</b>  | -0.01 | 9.59E-01 | -0.02 | 9.31E-01 |
| <b>RP11-697E14.2</b>  | 0.15  | 4.58E-01 | -0.02 | 9.31E-01 |
| <b>RP4-781K5.4</b>    | -0.07 | 7.26E-01 | -0.02 | 9.31E-01 |
| <b>SDHDP2</b>         | -0.17 | 3.93E-01 | -0.02 | 9.31E-01 |
| <b>TAF1A-AS1</b>      | 0.03  | 8.78E-01 | -0.02 | 9.31E-01 |
| <b>AC007381.3</b>     | -0.13 | 5.07E-01 | 0.02  | 9.31E-01 |
| <b>BBOX1</b>          | -0.01 | 9.68E-01 | 0.02  | 9.31E-01 |
| <b>CTA-223H9.9</b>    | 0.01  | 9.74E-01 | 0.02  | 9.31E-01 |
| <b>HNRNPA1P15</b>     | -0.24 | 2.18E-01 | 0.02  | 9.31E-01 |
| <b>IGFBP2</b>         | -0.07 | 7.15E-01 | 0.02  | 9.31E-01 |
| <b>MIR4269</b>        | 0.05  | 7.91E-01 | 0.02  | 9.31E-01 |
| <b>MRPL21</b>         | 0.11  | 5.91E-01 | 0.02  | 9.31E-01 |
| <b>MRPS16</b>         | 0.19  | 3.43E-01 | 0.02  | 9.31E-01 |
| <b>MT1E</b>           | 0.19  | 3.44E-01 | 0.02  | 9.31E-01 |
| <b>RCAN1</b>          | 0.00  | 9.93E-01 | 0.02  | 9.31E-01 |
| <b>RP1-251I12.1</b>   | 0.01  | 9.64E-01 | 0.02  | 9.31E-01 |
| <b>RP11-505E24.3</b>  | -0.10 | 6.30E-01 | 0.02  | 9.31E-01 |
| <b>RP5-1042K10.10</b> | -0.11 | 5.72E-01 | 0.02  | 9.31E-01 |
| <b>RPL30</b>          | 0.13  | 5.17E-01 | 0.02  | 9.31E-01 |
| <b>SPDYE2B</b>        | -0.06 | 7.53E-01 | 0.02  | 9.31E-01 |
| <b>TMEM14EP</b>       | -0.29 | 1.29E-01 | 0.02  | 9.31E-01 |
| <b>XLOC_014106</b>    | -0.14 | 4.86E-01 | 0.02  | 9.31E-01 |
| <b>AC006159.5</b>     | -0.10 | 6.04E-01 | 0.02  | 9.33E-01 |
| <b>AC073283.4</b>     | 0.05  | 8.04E-01 | -0.02 | 9.33E-01 |
| <b>ADAMTS19</b>       | -0.15 | 4.39E-01 | -0.02 | 9.33E-01 |
| <b>ARL4AP2</b>        | -0.19 | 3.43E-01 | 0.02  | 9.33E-01 |
| <b>C11orf21</b>       | 0.13  | 5.11E-01 | -0.02 | 9.33E-01 |
| <b>C19orf57</b>       | 0.16  | 4.21E-01 | 0.02  | 9.33E-01 |

|               |       |          |       |          |
|---------------|-------|----------|-------|----------|
| CCDC71L       | 0.10  | 6.31E-01 | 0.02  | 9.33E-01 |
| DDX19A        | 0.35  | 6.98E-02 | 0.02  | 9.33E-01 |
| DMTN          | -0.24 | 2.20E-01 | 0.02  | 9.33E-01 |
| GGTA2P        | -0.25 | 1.93E-01 | 0.02  | 9.33E-01 |
| HHAT          | 0.16  | 4.08E-01 | 0.02  | 9.33E-01 |
| HIST1H2BK     | -0.08 | 6.91E-01 | 0.02  | 9.33E-01 |
| HMGB3P24      | -0.17 | 3.89E-01 | -0.02 | 9.33E-01 |
| IGHA2         | 0.47  | 1.24E-02 | 0.02  | 9.33E-01 |
| KB-1517D11.4  | -0.12 | 5.44E-01 | -0.02 | 9.33E-01 |
| KIF24         | -0.05 | 7.94E-01 | -0.02 | 9.33E-01 |
| LEXM          | 0.11  | 5.74E-01 | -0.02 | 9.33E-01 |
| MID1IP1       | 0.28  | 1.55E-01 | 0.02  | 9.33E-01 |
| NBPF16        | -0.09 | 6.41E-01 | 0.02  | 9.33E-01 |
| PGAM1P7       | -0.23 | 2.39E-01 | -0.02 | 9.33E-01 |
| PIGX          | 0.18  | 3.69E-01 | -0.02 | 9.33E-01 |
| PMP22         | -0.33 | 8.73E-02 | 0.02  | 9.33E-01 |
| POU2F3        | 0.04  | 8.42E-01 | 0.02  | 9.33E-01 |
| PPP1R15A      | -0.22 | 2.63E-01 | 0.02  | 9.33E-01 |
| RP1-198K11.5  | 0.25  | 2.09E-01 | 0.02  | 9.33E-01 |
| RP11-353N14.4 | -0.38 | 4.83E-02 | -0.02 | 9.33E-01 |
| RP11-383D22.1 | -0.05 | 7.94E-01 | 0.02  | 9.33E-01 |
| RP11-468H14.2 | -0.38 | 4.69E-02 | -0.02 | 9.33E-01 |
| RP11-767N6.7  | 0.02  | 9.03E-01 | -0.02 | 9.33E-01 |
| SOCS7         | 0.10  | 6.07E-01 | -0.02 | 9.33E-01 |
| TMEM139       | -0.07 | 7.32E-01 | -0.02 | 9.33E-01 |
| XLOC_002710   | -0.17 | 3.80E-01 | 0.02  | 9.33E-01 |
| Z85986.1      | -0.15 | 4.38E-01 | 0.02  | 9.33E-01 |
| ABCA9         | -0.10 | 6.28E-01 | 0.02  | 9.34E-01 |
| AC005682.6    | 0.00  | 9.97E-01 | -0.02 | 9.34E-01 |
| AC006014.1    | 0.43  | 2.21E-02 | -0.02 | 9.34E-01 |
| AC007161.5    | 0.08  | 6.76E-01 | 0.02  | 9.34E-01 |
| ANKRD45       | 0.11  | 5.86E-01 | 0.02  | 9.34E-01 |
| APRT          | 0.17  | 3.77E-01 | 0.02  | 9.34E-01 |
| C10orf71-AS1  | -0.20 | 3.02E-01 | -0.02 | 9.34E-01 |
| CBWD7         | -0.22 | 2.51E-01 | 0.02  | 9.34E-01 |
| CBX1          | 0.00  | 9.80E-01 | -0.02 | 9.34E-01 |
| CCDC184       | 0.08  | 6.93E-01 | -0.02 | 9.34E-01 |
| CCT8          | 0.05  | 7.88E-01 | -0.02 | 9.34E-01 |
| CECR9         | -0.03 | 8.66E-01 | -0.02 | 9.34E-01 |
| CES5AP1       | -0.32 | 9.30E-02 | 0.02  | 9.34E-01 |
| CTD-2235C13.3 | -0.05 | 7.98E-01 | -0.02 | 9.34E-01 |
| DCPS          | 0.01  | 9.53E-01 | -0.02 | 9.34E-01 |
| DDOST         | 0.04  | 8.45E-01 | 0.02  | 9.34E-01 |
| DHX30         | 0.04  | 8.21E-01 | 0.02  | 9.34E-01 |
| DNAJC2        | 0.14  | 4.66E-01 | 0.02  | 9.34E-01 |
| DUSP28        | -0.33 | 8.75E-02 | 0.02  | 9.34E-01 |
| FUCA2         | 0.02  | 9.38E-01 | 0.02  | 9.34E-01 |

|                      |       |          |       |          |
|----------------------|-------|----------|-------|----------|
| <b>G29811</b>        | -0.01 | 9.51E-01 | 0.02  | 9.34E-01 |
| <b>GDA</b>           | 0.17  | 3.82E-01 | 0.02  | 9.34E-01 |
| <b>KLK10</b>         | 0.07  | 7.28E-01 | -0.02 | 9.34E-01 |
| <b>KRTAP4-12</b>     | -0.19 | 3.41E-01 | 0.02  | 9.34E-01 |
| <b>LRRC57</b>        | 0.00  | 1.00E+00 | 0.02  | 9.34E-01 |
| <b>MAPK6</b>         | 0.13  | 5.04E-01 | 0.02  | 9.34E-01 |
| <b>NME6</b>          | 0.18  | 3.60E-01 | -0.02 | 9.34E-01 |
| <b>NUDT16P1</b>      | 0.22  | 2.67E-01 | -0.02 | 9.34E-01 |
| <b>PDYN</b>          | -0.21 | 2.80E-01 | 0.02  | 9.34E-01 |
| <b>PF4</b>           | 0.23  | 2.44E-01 | -0.02 | 9.34E-01 |
| <b>POLG2</b>         | 0.21  | 2.84E-01 | 0.02  | 9.34E-01 |
| <b>RAD21-AS1</b>     | 0.21  | 2.77E-01 | -0.02 | 9.34E-01 |
| <b>RN7SL809P</b>     | 0.12  | 5.57E-01 | -0.02 | 9.34E-01 |
| <b>RNU6-425P</b>     | 0.01  | 9.59E-01 | 0.02  | 9.34E-01 |
| <b>RP11-20L24.1</b>  | 0.10  | 6.15E-01 | -0.02 | 9.34E-01 |
| <b>RP11-298C3.2</b>  | 0.15  | 4.60E-01 | -0.02 | 9.34E-01 |
| <b>RP11-362F19.1</b> | -0.03 | 8.98E-01 | -0.02 | 9.34E-01 |
| <b>RP11-540B6.6</b>  | -0.05 | 7.95E-01 | 0.02  | 9.34E-01 |
| <b>RP11-785H5.2</b>  | -0.05 | 8.02E-01 | -0.02 | 9.34E-01 |
| <b>RP11-817I4.1</b>  | 0.08  | 7.01E-01 | 0.02  | 9.34E-01 |
| <b>RP5-1142A6.8</b>  | -0.03 | 8.66E-01 | 0.02  | 9.34E-01 |
| <b>RPL34P6</b>       | -0.09 | 6.44E-01 | 0.02  | 9.34E-01 |
| <b>TBC1D22B</b>      | 0.16  | 4.17E-01 | -0.02 | 9.34E-01 |
| <b>TOE1</b>          | 0.01  | 9.71E-01 | -0.02 | 9.34E-01 |
| <b>TRIM31</b>        | 0.03  | 8.63E-01 | 0.02  | 9.34E-01 |
| <b>VDAC1</b>         | 0.05  | 8.15E-01 | -0.02 | 9.34E-01 |
| <b>XRR1</b>          | -0.17 | 3.96E-01 | 0.02  | 9.34E-01 |
| <b>ZNF528</b>        | -0.05 | 7.94E-01 | -0.02 | 9.34E-01 |
| <b>ZNF776</b>        | 0.17  | 4.00E-01 | 0.02  | 9.34E-01 |
| <b>AC012358.4</b>    | -0.18 | 3.62E-01 | 0.02  | 9.35E-01 |
| <b>ADGRG5</b>        | -0.15 | 4.59E-01 | 0.02  | 9.35E-01 |
| <b>ANKRD50</b>       | 0.01  | 9.58E-01 | -0.02 | 9.35E-01 |
| <b>C8orf76</b>       | 0.05  | 7.94E-01 | -0.02 | 9.35E-01 |
| <b>CAND2</b>         | 0.01  | 9.57E-01 | -0.02 | 9.35E-01 |
| <b>EIF1</b>          | -0.27 | 1.63E-01 | 0.02  | 9.35E-01 |
| <b>ERI1</b>          | 0.31  | 1.03E-01 | 0.02  | 9.35E-01 |
| <b>ERLIN2</b>        | 0.19  | 3.35E-01 | -0.02 | 9.35E-01 |
| <b>FAM182A</b>       | -0.02 | 9.24E-01 | 0.02  | 9.35E-01 |
| <b>FHL2</b>          | 0.07  | 7.05E-01 | -0.02 | 9.35E-01 |
| <b>G19426</b>        | 0.11  | 5.84E-01 | 0.02  | 9.35E-01 |
| <b>G41074</b>        | -0.13 | 5.12E-01 | 0.02  | 9.35E-01 |
| <b>HSH2D</b>         | 0.34  | 7.66E-02 | 0.02  | 9.35E-01 |
| <b>MDH2</b>          | 0.22  | 2.62E-01 | -0.02 | 9.35E-01 |
| <b>METTL2A</b>       | -0.04 | 8.56E-01 | -0.02 | 9.35E-01 |
| <b>MIAT</b>          | -0.09 | 6.42E-01 | -0.02 | 9.35E-01 |
| <b>MXRA5</b>         | -0.22 | 2.67E-01 | 0.02  | 9.35E-01 |
| <b>NCAPD2</b>        | 0.05  | 8.11E-01 | 0.02  | 9.35E-01 |

|                |       |          |       |          |
|----------------|-------|----------|-------|----------|
| RETSAT         | -0.07 | 7.17E-01 | 0.02  | 9.35E-01 |
| RHOQP1         | -0.18 | 3.72E-01 | -0.02 | 9.35E-01 |
| RNF217-AS1     | -0.03 | 8.85E-01 | -0.02 | 9.35E-01 |
| RP11-153K11.3  | -0.02 | 9.01E-01 | 0.02  | 9.35E-01 |
| RP11-195B21.3  | -0.17 | 3.84E-01 | 0.02  | 9.35E-01 |
| RP11-573E11.2  | -0.36 | 6.33E-02 | 0.02  | 9.35E-01 |
| RP13-516M14.10 | -0.06 | 7.71E-01 | -0.02 | 9.35E-01 |
| RP5-1027G4.3   | 0.16  | 4.20E-01 | 0.02  | 9.35E-01 |
| RP5-902P8.12   | -0.14 | 4.86E-01 | -0.02 | 9.35E-01 |
| RPSAP6         | 0.01  | 9.47E-01 | -0.02 | 9.35E-01 |
| STAT4          | 0.09  | 6.32E-01 | 0.02  | 9.35E-01 |
| STX8           | -0.28 | 1.53E-01 | 0.02  | 9.35E-01 |
| TCAF1P1        | -0.12 | 5.48E-01 | -0.02 | 9.35E-01 |
| UBE2FP2        | -0.18 | 3.58E-01 | -0.02 | 9.35E-01 |
| VBP1           | 0.06  | 7.75E-01 | -0.02 | 9.35E-01 |
| WDR5           | 0.01  | 9.74E-01 | -0.02 | 9.35E-01 |
| ADAMTSL2       | 0.00  | 9.96E-01 | -0.02 | 9.36E-01 |
| AP006222.2     | 0.07  | 7.14E-01 | -0.02 | 9.36E-01 |
| ARFIP2         | 0.14  | 4.66E-01 | 0.02  | 9.36E-01 |
| ASB16          | 0.30  | 1.18E-01 | 0.02  | 9.36E-01 |
| CTD-2510F5.4   | 0.14  | 4.70E-01 | -0.02 | 9.36E-01 |
| FOXN3-AS1      | 0.00  | 9.96E-01 | 0.02  | 9.36E-01 |
| G16245         | 0.25  | 1.93E-01 | -0.02 | 9.36E-01 |
| GEMIN5         | 0.11  | 5.92E-01 | -0.02 | 9.36E-01 |
| GLTSCR2-AS1    | -0.30 | 1.18E-01 | -0.02 | 9.36E-01 |
| HNRNPH2        | 0.10  | 6.10E-01 | -0.02 | 9.36E-01 |
| KRTAP10-10     | -0.07 | 7.22E-01 | -0.02 | 9.36E-01 |
| MAP2K3         | 0.14  | 4.80E-01 | 0.02  | 9.36E-01 |
| MGC45922       | 0.25  | 2.03E-01 | -0.02 | 9.36E-01 |
| NPEPL1         | -0.12 | 5.33E-01 | 0.02  | 9.36E-01 |
| NUSAP1         | 0.10  | 6.22E-01 | -0.02 | 9.36E-01 |
| OSR2           | -0.18 | 3.49E-01 | -0.02 | 9.36E-01 |
| PMS2P7         | 0.17  | 3.83E-01 | -0.02 | 9.36E-01 |
| RAP2C          | 0.41  | 2.99E-02 | -0.02 | 9.36E-01 |
| RP11-10N23.2   | -0.04 | 8.40E-01 | 0.02  | 9.36E-01 |
| RP11-148K1.10  | -0.41 | 2.84E-02 | -0.02 | 9.36E-01 |
| RP11-276H19.2  | 0.29  | 1.32E-01 | -0.02 | 9.36E-01 |
| RP11-476I15.5  | 0.09  | 6.64E-01 | -0.02 | 9.36E-01 |
| RP11-686D22.7  | 0.06  | 7.69E-01 | 0.02  | 9.36E-01 |
| RP11-787I22.3  | -0.16 | 4.08E-01 | -0.02 | 9.36E-01 |
| RRS1-AS1       | -0.05 | 8.09E-01 | -0.02 | 9.36E-01 |
| SNORD12C       | -0.16 | 4.13E-01 | 0.02  | 9.36E-01 |
| WDHD1          | -0.02 | 9.25E-01 | 0.02  | 9.36E-01 |
| XLOC_012894    | 0.08  | 6.84E-01 | 0.02  | 9.36E-01 |
| XRCC6          | 0.12  | 5.40E-01 | 0.02  | 9.36E-01 |
| YWHAE          | 0.15  | 4.49E-01 | 0.02  | 9.36E-01 |
| AC004699.1     | -0.13 | 5.22E-01 | 0.02  | 9.37E-01 |



|                      |       |          |       |          |
|----------------------|-------|----------|-------|----------|
| <b>AC129492.6</b>    | 0.07  | 7.32E-01 | 0.02  | 9.37E-01 |
| <b>BANF1</b>         | -0.11 | 5.79E-01 | 0.02  | 9.37E-01 |
| <b>C2orf88</b>       | -0.07 | 7.42E-01 | 0.02  | 9.37E-01 |
| <b>CDCA5</b>         | 0.04  | 8.52E-01 | 0.02  | 9.37E-01 |
| <b>G27940</b>        | -0.10 | 6.04E-01 | 0.02  | 9.37E-01 |
| <b>LA16c-431H6.6</b> | -0.27 | 1.69E-01 | 0.02  | 9.37E-01 |
| <b>PBDC1</b>         | 0.17  | 3.96E-01 | 0.02  | 9.37E-01 |
| <b>PCBP2P1</b>       | -0.07 | 7.29E-01 | 0.02  | 9.37E-01 |
| <b>RNU6-750P</b>     | -0.12 | 5.44E-01 | 0.02  | 9.37E-01 |
| <b>RP11-145M9.6</b>  | 0.08  | 6.77E-01 | 0.02  | 9.37E-01 |
| <b>RP11-380B4.3</b>  | 0.17  | 3.95E-01 | 0.02  | 9.37E-01 |
| <b>RP11-455O6.9</b>  | -0.11 | 5.79E-01 | 0.02  | 9.37E-01 |
| <b>RP11-524H19.2</b> | -0.18 | 3.60E-01 | 0.02  | 9.37E-01 |
| <b>RP5-1112D6.4</b>  | -0.02 | 9.35E-01 | 0.02  | 9.37E-01 |
| <b>SPOPL</b>         | 0.33  | 8.59E-02 | 0.02  | 9.37E-01 |
| <b>TDGF1P6</b>       | 0.13  | 4.96E-01 | 0.02  | 9.37E-01 |
| <b>UBA52</b>         | 0.20  | 3.14E-01 | 0.02  | 9.37E-01 |
| <b>WARS</b>          | 0.15  | 4.49E-01 | 0.02  | 9.37E-01 |
| <b>XIRP2</b>         | -0.07 | 7.12E-01 | 0.02  | 9.37E-01 |
| <b>XLOC_008957</b>   | 0.11  | 5.93E-01 | 0.02  | 9.37E-01 |
| <b>COX6C</b>         | 0.17  | 3.81E-01 | -0.02 | 9.37E-01 |
| <b>DDIT3</b>         | -0.24 | 2.18E-01 | -0.02 | 9.37E-01 |
| <b>FBXO21</b>        | 0.06  | 7.62E-01 | -0.02 | 9.37E-01 |
| <b>KIF5C</b>         | -0.55 | 2.27E-03 | -0.02 | 9.37E-01 |
| <b>LA16c-380A1.1</b> | 0.07  | 7.29E-01 | -0.02 | 9.37E-01 |
| <b>MED19</b>         | 0.07  | 7.14E-01 | -0.02 | 9.37E-01 |
| <b>MRPS36</b>        | 0.06  | 7.68E-01 | -0.02 | 9.37E-01 |
| <b>RNF126P1</b>      | 0.17  | 4.01E-01 | -0.02 | 9.37E-01 |
| <b>RP11-174O3.6</b>  | -0.02 | 9.33E-01 | -0.02 | 9.37E-01 |
| <b>RP11-350D17.3</b> | 0.28  | 1.42E-01 | -0.02 | 9.37E-01 |
| <b>RP11-664D1.1</b>  | -0.15 | 4.56E-01 | -0.02 | 9.37E-01 |
| <b>RP11-727A23.5</b> | 0.16  | 4.29E-01 | -0.02 | 9.37E-01 |
| <b>TNK2-AS1</b>      | -0.26 | 1.79E-01 | -0.02 | 9.37E-01 |
| <b>ZKSCAN1</b>       | -0.10 | 6.23E-01 | -0.02 | 9.37E-01 |
| <b>ZNF316</b>        | -0.21 | 2.82E-01 | -0.02 | 9.37E-01 |
| <b>ZNF460</b>        | 0.16  | 4.27E-01 | -0.02 | 9.37E-01 |
| <b>ZNF773</b>        | 0.00  | 9.91E-01 | -0.02 | 9.37E-01 |
| <b>AC017035.2</b>    | -0.23 | 2.29E-01 | -0.02 | 9.39E-01 |
| <b>AC022431.3</b>    | 0.06  | 7.80E-01 | -0.02 | 9.39E-01 |
| <b>ANKRD44</b>       | -0.08 | 6.73E-01 | -0.02 | 9.39E-01 |
| <b>ANO6</b>          | -0.01 | 9.79E-01 | -0.02 | 9.39E-01 |
| <b>B3GALNT1</b>      | 0.21  | 2.75E-01 | 0.02  | 9.39E-01 |
| <b>CDC16</b>         | -0.08 | 6.98E-01 | 0.02  | 9.39E-01 |
| <b>CTB-25B13.12</b>  | 0.15  | 4.60E-01 | 0.02  | 9.39E-01 |
| <b>CTD-2622I13.3</b> | 0.07  | 7.25E-01 | 0.02  | 9.39E-01 |
| <b>CTD-3064H18.2</b> | -0.01 | 9.67E-01 | -0.02 | 9.39E-01 |
| <b>EXOSC10</b>       | 0.08  | 6.91E-01 | 0.02  | 9.39E-01 |

|                         |       |          |       |          |
|-------------------------|-------|----------|-------|----------|
| <b>FOLR1</b>            | -0.24 | 2.18E-01 | -0.02 | 9.39E-01 |
| <b>G30963</b>           | -0.17 | 3.99E-01 | 0.02  | 9.39E-01 |
| <b>H2AFX</b>            | -0.01 | 9.63E-01 | 0.02  | 9.39E-01 |
| <b>H2AFZP3</b>          | -0.32 | 1.01E-01 | -0.02 | 9.39E-01 |
| <b>HMGN1P36</b>         | 0.05  | 7.88E-01 | 0.02  | 9.39E-01 |
| <b>IGSF8</b>            | 0.04  | 8.39E-01 | -0.02 | 9.39E-01 |
| <b>MRPL20</b>           | 0.10  | 6.29E-01 | 0.02  | 9.39E-01 |
| <b>NLRC4</b>            | 0.22  | 2.60E-01 | 0.02  | 9.39E-01 |
| <b>OCIAD1</b>           | 0.25  | 2.01E-01 | 0.02  | 9.39E-01 |
| <b>PDCD6</b>            | 0.33  | 8.53E-02 | 0.02  | 9.39E-01 |
| <b>RP11-175P13.3</b>    | 0.03  | 8.92E-01 | 0.02  | 9.39E-01 |
| <b>RP11-279N8.1</b>     | -0.20 | 3.08E-01 | -0.02 | 9.39E-01 |
| <b>RP11-304C12.5</b>    | 0.14  | 4.86E-01 | -0.02 | 9.39E-01 |
| <b>RP11-754B17.1</b>    | 0.22  | 2.61E-01 | 0.02  | 9.39E-01 |
| <b>RP11-977B10.2</b>    | -0.46 | 1.39E-02 | -0.02 | 9.39E-01 |
| <b>RP11-98D18.9</b>     | -0.33 | 8.90E-02 | 0.02  | 9.39E-01 |
| <b>RSL24D1P6</b>        | -0.03 | 8.93E-01 | -0.02 | 9.39E-01 |
| <b>SCNM1</b>            | -0.03 | 8.85E-01 | -0.02 | 9.39E-01 |
| <b>SERF2</b>            | 0.19  | 3.31E-01 | 0.02  | 9.39E-01 |
| <b>SLCO3A1</b>          | -0.22 | 2.58E-01 | -0.02 | 9.39E-01 |
| <b>SPTY2D1-AS1</b>      | 0.10  | 6.25E-01 | -0.02 | 9.39E-01 |
| <b>SULT1A2</b>          | -0.07 | 7.26E-01 | 0.02  | 9.39E-01 |
| <b>THSD7A</b>           | -0.09 | 6.45E-01 | 0.02  | 9.39E-01 |
| <b>(bac-BPG157A10.:</b> | 0.21  | 2.82E-01 | 0.02  | 9.39E-01 |
| <b>ABCF1</b>            | 0.25  | 1.94E-01 | 0.02  | 9.40E-01 |
| <b>AC005162.5</b>       | 0.38  | 4.49E-02 | 0.02  | 9.40E-01 |
| <b>AP002884.1</b>       | 0.16  | 4.27E-01 | -0.02 | 9.40E-01 |
| <b>APOPT1</b>           | -0.13 | 5.02E-01 | 0.02  | 9.40E-01 |
| <b>ATP6V1C1</b>         | 0.20  | 3.20E-01 | 0.02  | 9.40E-01 |
| <b>C12orf10</b>         | 0.00  | 9.81E-01 | -0.02 | 9.40E-01 |
| <b>DUXAP9</b>           | 0.11  | 5.60E-01 | 0.02  | 9.40E-01 |
| <b>EHD4</b>             | 0.21  | 2.80E-01 | -0.02 | 9.40E-01 |
| <b>HECTD2</b>           | -0.07 | 7.11E-01 | -0.02 | 9.40E-01 |
| <b>HPRT1</b>            | 0.23  | 2.41E-01 | -0.02 | 9.40E-01 |
| <b>INTS6-AS1</b>        | 0.10  | 6.04E-01 | -0.02 | 9.40E-01 |
| <b>JAK2</b>             | 0.13  | 4.93E-01 | -0.02 | 9.40E-01 |
| <b>LY6G5C</b>           | 0.02  | 9.25E-01 | 0.02  | 9.40E-01 |
| <b>MAP2K4P1</b>         | -0.01 | 9.43E-01 | -0.02 | 9.40E-01 |
| <b>MED7</b>             | 0.20  | 3.00E-01 | 0.02  | 9.40E-01 |
| <b>MICA</b>             | 0.08  | 6.82E-01 | 0.02  | 9.40E-01 |
| <b>MMP3</b>             | 0.01  | 9.59E-01 | -0.02 | 9.40E-01 |
| <b>NUDT11</b>           | -0.05 | 7.89E-01 | -0.02 | 9.40E-01 |
| <b>OVCH1</b>            | 0.05  | 8.09E-01 | 0.02  | 9.40E-01 |
| <b>PDCD4</b>            | 0.04  | 8.39E-01 | 0.02  | 9.40E-01 |
| <b>PDRG1</b>            | 0.40  | 3.49E-02 | 0.02  | 9.40E-01 |
| <b>POC5</b>             | -0.14 | 4.80E-01 | 0.02  | 9.40E-01 |
| <b>RBM42</b>            | 0.09  | 6.38E-01 | 0.02  | 9.40E-01 |

|                  |       |          |       |          |
|------------------|-------|----------|-------|----------|
| RGL3             | -0.04 | 8.44E-01 | 0.02  | 9.40E-01 |
| RHOXF1-AS1       | 0.29  | 1.30E-01 | -0.02 | 9.40E-01 |
| RN7SL213P        | -0.08 | 6.79E-01 | 0.02  | 9.40E-01 |
| RNA5SP494        | -0.20 | 3.15E-01 | 0.02  | 9.40E-01 |
| RNU6-1305P       | -0.32 | 9.71E-02 | -0.02 | 9.40E-01 |
| RP11-212I21.3    | -0.17 | 3.86E-01 | -0.02 | 9.40E-01 |
| RP11-350N15.5    | 0.01  | 9.70E-01 | -0.02 | 9.40E-01 |
| RP11-544M22.13   | -0.23 | 2.43E-01 | -0.02 | 9.40E-01 |
| RP11-554A11.7    | -0.11 | 5.61E-01 | -0.02 | 9.40E-01 |
| RP11-63M22.1     | -0.15 | 4.49E-01 | 0.02  | 9.40E-01 |
| RP11-715J22.2    | -0.06 | 7.50E-01 | 0.02  | 9.40E-01 |
| RP11-93K22.13    | 0.46  | 1.30E-02 | -0.02 | 9.40E-01 |
| RPUSD2           | 0.22  | 2.71E-01 | -0.02 | 9.40E-01 |
| SMURF2P1         | 0.10  | 6.08E-01 | 0.02  | 9.40E-01 |
| SOD3             | -0.44 | 1.83E-02 | -0.02 | 9.40E-01 |
| ZNF787           | 0.26  | 1.86E-01 | -0.02 | 9.40E-01 |
| AC087163.2       | -0.27 | 1.59E-01 | -0.01 | 9.41E-01 |
| ARHGFEF25        | -0.20 | 3.11E-01 | 0.01  | 9.41E-01 |
| BCAT1            | 0.19  | 3.24E-01 | 0.01  | 9.41E-01 |
| C2orf47          | 0.22  | 2.59E-01 | -0.01 | 9.41E-01 |
| CBFA2T3          | 0.00  | 9.97E-01 | -0.01 | 9.41E-01 |
| CDH23            | -0.25 | 2.00E-01 | -0.01 | 9.41E-01 |
| CMTM6            | 0.07  | 7.06E-01 | 0.01  | 9.41E-01 |
| COX7C            | 0.16  | 4.28E-01 | -0.01 | 9.41E-01 |
| CTD-3060P21.1    | 0.19  | 3.39E-01 | -0.01 | 9.41E-01 |
| EED              | 0.17  | 3.77E-01 | 0.01  | 9.41E-01 |
| FAM157C          | 0.23  | 2.37E-01 | -0.01 | 9.41E-01 |
| FAM184B          | -0.06 | 7.70E-01 | 0.01  | 9.41E-01 |
| FAM209B          | 0.29  | 1.39E-01 | 0.01  | 9.41E-01 |
| FLJ46284         | -0.24 | 2.15E-01 | 0.01  | 9.41E-01 |
| FOXN1            | 0.17  | 3.75E-01 | 0.01  | 9.41E-01 |
| FZD4             | -0.10 | 6.20E-01 | -0.01 | 9.41E-01 |
| GEMIN4           | 0.10  | 6.31E-01 | 0.01  | 9.41E-01 |
| HIST1H2AG        | 0.03  | 8.88E-01 | -0.01 | 9.41E-01 |
| KLHL24           | -0.05 | 8.02E-01 | -0.01 | 9.41E-01 |
| LIG3             | 0.08  | 6.74E-01 | -0.01 | 9.41E-01 |
| LINC01269        | 0.30  | 1.24E-01 | -0.01 | 9.41E-01 |
| LL09NC01-139C3.1 | 0.30  | 1.24E-01 | 0.01  | 9.41E-01 |
| NEFL             | -0.04 | 8.24E-01 | 0.01  | 9.41E-01 |
| NQO1             | 0.03  | 8.81E-01 | -0.01 | 9.41E-01 |
| OR9L1P           | 0.00  | 9.90E-01 | -0.01 | 9.41E-01 |
| RNF216P1         | 0.02  | 9.37E-01 | 0.01  | 9.41E-01 |
| RP11-1020A11.2   | -0.07 | 7.33E-01 | -0.01 | 9.41E-01 |
| RP11-102M11.1    | 0.06  | 7.73E-01 | 0.01  | 9.41E-01 |
| RP11-365N19.2    | -0.15 | 4.39E-01 | -0.01 | 9.41E-01 |
| RP11-427J23.1    | -0.35 | 6.77E-02 | 0.01  | 9.41E-01 |
| RP11-45F15.1     | -0.06 | 7.70E-01 | -0.01 | 9.41E-01 |

|                      |       |          |       |          |
|----------------------|-------|----------|-------|----------|
| <b>RP11-507K2.3</b>  | -0.06 | 7.64E-01 | -0.01 | 9.41E-01 |
| <b>RPS6P25</b>       | 0.03  | 8.61E-01 | 0.01  | 9.41E-01 |
| <b>TCHP</b>          | 0.04  | 8.49E-01 | -0.01 | 9.41E-01 |
| <b>TRMT2B</b>        | 0.16  | 4.10E-01 | 0.01  | 9.41E-01 |
| <b>WASH5P</b>        | -0.15 | 4.42E-01 | -0.01 | 9.41E-01 |
| <b>ZNF235</b>        | -0.18 | 3.55E-01 | 0.01  | 9.41E-01 |
| <b>ZNF585A</b>       | -0.23 | 2.44E-01 | -0.01 | 9.41E-01 |
| <b>ZNF783</b>        | 0.13  | 4.99E-01 | -0.01 | 9.41E-01 |
| <b>AC074117.13</b>   | -0.18 | 3.63E-01 | 0.01  | 9.42E-01 |
| <b>AC110926.4</b>    | 0.05  | 7.88E-01 | 0.01  | 9.42E-01 |
| <b>AL031320.1</b>    | 0.09  | 6.65E-01 | -0.01 | 9.42E-01 |
| <b>AL035610.1</b>    | 0.11  | 5.92E-01 | -0.01 | 9.42E-01 |
| <b>AL161626.1</b>    | 0.28  | 1.51E-01 | -0.01 | 9.42E-01 |
| <b>ALKBH1</b>        | 0.16  | 4.08E-01 | 0.01  | 9.42E-01 |
| <b>AP4B1</b>         | 0.23  | 2.47E-01 | 0.01  | 9.42E-01 |
| <b>BEST2</b>         | -0.09 | 6.57E-01 | 0.01  | 9.42E-01 |
| <b>CTC-250P20.2</b>  | -0.35 | 6.57E-02 | 0.01  | 9.42E-01 |
| <b>CTC-454I21.3</b>  | -0.07 | 7.05E-01 | -0.01 | 9.42E-01 |
| <b>CTD-2373N4.5</b>  | 0.10  | 6.26E-01 | 0.01  | 9.42E-01 |
| <b>FGF18</b>         | -0.02 | 9.04E-01 | 0.01  | 9.42E-01 |
| <b>GLI2</b>          | 0.05  | 8.02E-01 | -0.01 | 9.42E-01 |
| <b>GMNN</b>          | -0.08 | 6.87E-01 | 0.01  | 9.42E-01 |
| <b>HNRNPCP2</b>      | 0.03  | 8.76E-01 | 0.01  | 9.42E-01 |
| <b>IL9RP3</b>        | -0.01 | 9.56E-01 | 0.01  | 9.42E-01 |
| <b>IWS1</b>          | 0.25  | 2.00E-01 | 0.01  | 9.42E-01 |
| <b>KAT5</b>          | 0.16  | 4.07E-01 | -0.01 | 9.42E-01 |
| <b>LINC00950</b>     | -0.18 | 3.59E-01 | -0.01 | 9.42E-01 |
| <b>LINC01237</b>     | 0.03  | 8.90E-01 | 0.01  | 9.42E-01 |
| <b>MORN2</b>         | -0.03 | 8.98E-01 | -0.01 | 9.42E-01 |
| <b>MROH7</b>         | -0.08 | 6.86E-01 | 0.01  | 9.42E-01 |
| <b>MSL2</b>          | 0.11  | 5.71E-01 | -0.01 | 9.42E-01 |
| <b>PDIA4</b>         | 0.14  | 4.92E-01 | -0.01 | 9.42E-01 |
| <b>PPP6C</b>         | 0.15  | 4.54E-01 | 0.01  | 9.42E-01 |
| <b>PUDP</b>          | -0.13 | 5.10E-01 | 0.01  | 9.42E-01 |
| <b>PVRL2</b>         | 0.20  | 3.11E-01 | 0.01  | 9.42E-01 |
| <b>RNU6-892P</b>     | -0.06 | 7.64E-01 | 0.01  | 9.42E-01 |
| <b>RP1-251M9.2</b>   | 0.04  | 8.43E-01 | -0.01 | 9.42E-01 |
| <b>RP11-503L23.1</b> | -0.05 | 8.12E-01 | -0.01 | 9.42E-01 |
| <b>RP11-525G12.1</b> | -0.03 | 8.79E-01 | -0.01 | 9.42E-01 |
| <b>RP11-535M15.1</b> | 0.18  | 3.50E-01 | 0.01  | 9.42E-01 |
| <b>RP11-563N4.1</b>  | 0.18  | 3.55E-01 | -0.01 | 9.42E-01 |
| <b>RP4-635E18.6</b>  | -0.02 | 9.36E-01 | 0.01  | 9.42E-01 |
| <b>RP4-733B9.1</b>   | -0.17 | 3.91E-01 | 0.01  | 9.42E-01 |
| <b>RP4-737E23.2</b>  | -0.25 | 2.07E-01 | -0.01 | 9.42E-01 |
| <b>SFXN4</b>         | 0.10  | 6.11E-01 | 0.01  | 9.42E-01 |
| <b>SIGLEC9</b>       | 0.04  | 8.37E-01 | 0.01  | 9.42E-01 |
| <b>SNRPGP10</b>      | -0.11 | 5.79E-01 | -0.01 | 9.42E-01 |

|               |       |          |       |          |
|---------------|-------|----------|-------|----------|
| SPAG5         | 0.17  | 3.90E-01 | -0.01 | 9.42E-01 |
| TWF1P1        | 0.07  | 7.38E-01 | -0.01 | 9.42E-01 |
| XLOC_009607   | 0.05  | 7.86E-01 | 0.01  | 9.42E-01 |
| ZNF136        | -0.07 | 7.07E-01 | -0.01 | 9.42E-01 |
| AC022182.2    | 0.33  | 8.81E-02 | 0.01  | 9.43E-01 |
| ASPG          | 0.06  | 7.45E-01 | 0.01  | 9.43E-01 |
| ATP1A2        | -0.01 | 9.64E-01 | 0.01  | 9.43E-01 |
| CCDC94        | 0.07  | 7.24E-01 | 0.01  | 9.43E-01 |
| CEP89         | -0.24 | 2.28E-01 | 0.01  | 9.43E-01 |
| CTD-2033A16.2 | 0.33  | 8.53E-02 | 0.01  | 9.43E-01 |
| CTD-3131K8.3  | 0.17  | 4.01E-01 | 0.01  | 9.43E-01 |
| DGKE          | 0.22  | 2.54E-01 | 0.01  | 9.43E-01 |
| DMAP1         | -0.14 | 4.87E-01 | 0.01  | 9.43E-01 |
| ELMOD3        | -0.05 | 8.08E-01 | 0.01  | 9.43E-01 |
| GXYLT2        | -0.11 | 5.78E-01 | 0.01  | 9.43E-01 |
| MED8          | 0.15  | 4.39E-01 | 0.01  | 9.43E-01 |
| NDUFB2-AS1    | -0.16 | 4.04E-01 | 0.01  | 9.43E-01 |
| NOP10         | 0.10  | 6.23E-01 | 0.01  | 9.43E-01 |
| NUTM2D        | 0.11  | 5.69E-01 | 0.01  | 9.43E-01 |
| PAM           | -0.05 | 7.87E-01 | 0.01  | 9.43E-01 |
| POLR3A        | 0.22  | 2.56E-01 | 0.01  | 9.43E-01 |
| RIMKLA        | 0.29  | 1.34E-01 | 0.01  | 9.43E-01 |
| RNU1-87P      | 0.01  | 9.48E-01 | 0.01  | 9.43E-01 |
| RP11-266L9.6  | 0.05  | 7.94E-01 | 0.01  | 9.43E-01 |
| RP11-363J17.1 | -0.05 | 7.95E-01 | 0.01  | 9.43E-01 |
| RP11-65B7.2   | -0.22 | 2.61E-01 | 0.01  | 9.43E-01 |
| RPL26         | 0.19  | 3.33E-01 | 0.01  | 9.43E-01 |
| RTN3          | 0.03  | 8.76E-01 | 0.01  | 9.43E-01 |
| XLOC_004229   | 0.08  | 6.95E-01 | 0.01  | 9.43E-01 |
| ZNF563        | -0.24 | 2.28E-01 | 0.01  | 9.43E-01 |
| AP001442.2    | -0.13 | 4.99E-01 | -0.01 | 9.43E-01 |
| CTD-2561B21.5 | -0.19 | 3.25E-01 | -0.01 | 9.43E-01 |
| CYP4A22       | -0.09 | 6.46E-01 | -0.01 | 9.43E-01 |
| DDX43         | 0.30  | 1.17E-01 | -0.01 | 9.43E-01 |
| HIST1H1C      | -0.06 | 7.73E-01 | -0.01 | 9.43E-01 |
| HKR1          | -0.15 | 4.35E-01 | -0.01 | 9.43E-01 |
| KCNIP4-IT1    | 0.07  | 7.05E-01 | -0.01 | 9.43E-01 |
| KLK14         | 0.19  | 3.26E-01 | -0.01 | 9.43E-01 |
| KRTAP10-7     | -0.04 | 8.30E-01 | -0.01 | 9.43E-01 |
| ORC1          | 0.00  | 9.96E-01 | -0.01 | 9.43E-01 |
| SPACA4        | 0.07  | 7.28E-01 | -0.01 | 9.43E-01 |
| ST3GAL6       | 0.02  | 9.10E-01 | -0.01 | 9.43E-01 |
| ZMAT3         | -0.01 | 9.50E-01 | -0.01 | 9.43E-01 |
| ZNF619        | 0.27  | 1.63E-01 | -0.01 | 9.43E-01 |
| snR65         | -0.12 | 5.52E-01 | -0.01 | 9.43E-01 |
| AC004237.1    | -0.31 | 1.09E-01 | -0.01 | 9.45E-01 |
| AC007881.1    | 0.41  | 2.98E-02 | 0.01  | 9.45E-01 |

|                       |       |          |       |          |
|-----------------------|-------|----------|-------|----------|
| <b>AC010761.8</b>     | 0.26  | 1.74E-01 | -0.01 | 9.45E-01 |
| <b>AC016739.2</b>     | -0.03 | 8.64E-01 | 0.01  | 9.45E-01 |
| <b>AC079922.2</b>     | -0.24 | 2.22E-01 | -0.01 | 9.45E-01 |
| <b>ARID3B</b>         | 0.28  | 1.49E-01 | -0.01 | 9.45E-01 |
| <b>BRCA1</b>          | -0.17 | 3.88E-01 | -0.01 | 9.45E-01 |
| <b>CAV3</b>           | -0.26 | 1.76E-01 | -0.01 | 9.45E-01 |
| <b>CBFB</b>           | 0.19  | 3.24E-01 | -0.01 | 9.45E-01 |
| <b>CDT1</b>           | 0.02  | 9.25E-01 | -0.01 | 9.45E-01 |
| <b>CENPI</b>          | -0.12 | 5.49E-01 | -0.01 | 9.45E-01 |
| <b>E2F4</b>           | 0.18  | 3.55E-01 | -0.01 | 9.45E-01 |
| <b>FAM122C</b>        | 0.14  | 4.83E-01 | 0.01  | 9.45E-01 |
| <b>FAM87B</b>         | 0.28  | 1.55E-01 | -0.01 | 9.45E-01 |
| <b>G39823</b>         | -0.09 | 6.59E-01 | 0.01  | 9.45E-01 |
| <b>G42804</b>         | -0.07 | 7.23E-01 | 0.01  | 9.45E-01 |
| <b>IFRD2</b>          | 0.09  | 6.50E-01 | -0.01 | 9.45E-01 |
| <b>IRF5</b>           | 0.02  | 9.10E-01 | -0.01 | 9.45E-01 |
| <b>KRT35</b>          | -0.14 | 4.88E-01 | -0.01 | 9.45E-01 |
| <b>LDOC1L</b>         | 0.10  | 6.14E-01 | -0.01 | 9.45E-01 |
| <b>LINC00314</b>      | -0.08 | 6.91E-01 | 0.01  | 9.45E-01 |
| <b>LINC01415</b>      | 0.09  | 6.57E-01 | 0.01  | 9.45E-01 |
| <b>MTND6P4</b>        | 0.03  | 8.62E-01 | -0.01 | 9.45E-01 |
| <b>NIFK</b>           | 0.22  | 2.56E-01 | -0.01 | 9.45E-01 |
| <b>NUCKS1</b>         | 0.13  | 5.13E-01 | -0.01 | 9.45E-01 |
| <b>PALB2</b>          | -0.07 | 7.35E-01 | -0.01 | 9.45E-01 |
| <b>PANK1</b>          | 0.26  | 1.74E-01 | 0.01  | 9.45E-01 |
| <b>PDIA6</b>          | 0.16  | 4.16E-01 | 0.01  | 9.45E-01 |
| <b>PLN</b>            | 0.04  | 8.40E-01 | -0.01 | 9.45E-01 |
| <b>POP1</b>           | 0.23  | 2.49E-01 | -0.01 | 9.45E-01 |
| <b>RLBP1</b>          | 0.03  | 8.92E-01 | -0.01 | 9.45E-01 |
| <b>RN7SL431P</b>      | -0.04 | 8.42E-01 | 0.01  | 9.45E-01 |
| <b>RNU6-469P</b>      | 0.16  | 4.29E-01 | -0.01 | 9.45E-01 |
| <b>RP1-202O8.2</b>    | -0.09 | 6.48E-01 | 0.01  | 9.45E-01 |
| <b>RP11-1046B16.3</b> | 0.11  | 5.66E-01 | -0.01 | 9.45E-01 |
| <b>RP11-134L10.1</b>  | 0.12  | 5.41E-01 | -0.01 | 9.45E-01 |
| <b>RP11-360F5.3</b>   | 0.09  | 6.34E-01 | -0.01 | 9.45E-01 |
| <b>RP11-391L3.5</b>   | 0.23  | 2.45E-01 | -0.01 | 9.45E-01 |
| <b>RP11-430G17.3</b>  | -0.14 | 4.66E-01 | -0.01 | 9.45E-01 |
| <b>RP11-629B11.5</b>  | 0.12  | 5.36E-01 | -0.01 | 9.45E-01 |
| <b>RP11-74C1.2</b>    | -0.04 | 8.59E-01 | -0.01 | 9.45E-01 |
| <b>RP3-331H24.7</b>   | -0.13 | 5.10E-01 | -0.01 | 9.45E-01 |
| <b>RP3-412A9.16</b>   | 0.08  | 6.99E-01 | -0.01 | 9.45E-01 |
| <b>RP4-616B8.6</b>    | -0.10 | 6.00E-01 | -0.01 | 9.45E-01 |
| <b>SEC63P1</b>        | 0.23  | 2.41E-01 | -0.01 | 9.45E-01 |
| <b>SPATA13-AS1</b>    | -0.05 | 8.01E-01 | -0.01 | 9.45E-01 |
| <b>STAB2</b>          | 0.13  | 5.09E-01 | 0.01  | 9.45E-01 |
| <b>SULT1B1</b>        | 0.40  | 3.41E-02 | -0.01 | 9.45E-01 |
| <b>TPM3P6</b>         | 0.01  | 9.60E-01 | 0.01  | 9.45E-01 |

|               |       |          |       |          |
|---------------|-------|----------|-------|----------|
| TRA2B         | 0.00  | 9.85E-01 | 0.01  | 9.45E-01 |
| TUSC7         | -0.27 | 1.65E-01 | -0.01 | 9.45E-01 |
| USMG5         | 0.14  | 4.75E-01 | 0.01  | 9.45E-01 |
| AC011406.2    | 0.05  | 8.16E-01 | 0.01  | 9.46E-01 |
| AC012593.1    | 0.03  | 8.93E-01 | -0.01 | 9.46E-01 |
| ADAMTS3       | 0.10  | 6.15E-01 | -0.01 | 9.46E-01 |
| AKAP2         | -0.17 | 3.96E-01 | 0.01  | 9.46E-01 |
| ATP5G1        | 0.04  | 8.43E-01 | -0.01 | 9.46E-01 |
| B9D2          | -0.12 | 5.29E-01 | -0.01 | 9.46E-01 |
| C1orf226      | 0.02  | 9.25E-01 | 0.01  | 9.46E-01 |
| C6orf136      | -0.07 | 7.16E-01 | -0.01 | 9.46E-01 |
| C9orf173-AS1  | -0.23 | 2.39E-01 | 0.01  | 9.46E-01 |
| CABIN1        | -0.08 | 6.82E-01 | 0.01  | 9.46E-01 |
| CICP14        | 0.25  | 1.94E-01 | -0.01 | 9.46E-01 |
| CLGN          | -0.03 | 8.82E-01 | 0.01  | 9.46E-01 |
| CTD-2619J13.9 | 0.20  | 3.14E-01 | 0.01  | 9.46E-01 |
| CYC1          | 0.13  | 5.19E-01 | 0.01  | 9.46E-01 |
| DNAJC8        | 0.06  | 7.64E-01 | -0.01 | 9.46E-01 |
| FAM114A2      | 0.13  | 5.12E-01 | 0.01  | 9.46E-01 |
| GALNT8        | -0.17 | 3.82E-01 | 0.01  | 9.46E-01 |
| GGNBP2        | -0.27 | 1.62E-01 | -0.01 | 9.46E-01 |
| INPP5D        | 0.05  | 8.14E-01 | 0.01  | 9.46E-01 |
| LAMB3         | 0.09  | 6.63E-01 | -0.01 | 9.46E-01 |
| RAB36         | 0.15  | 4.41E-01 | 0.01  | 9.46E-01 |
| RBX1          | 0.13  | 5.22E-01 | -0.01 | 9.46E-01 |
| RN7SKP110     | -0.15 | 4.31E-01 | -0.01 | 9.46E-01 |
| RNU4-42P      | 0.10  | 6.31E-01 | -0.01 | 9.46E-01 |
| RP11-3N13.2   | 0.00  | 9.93E-01 | 0.01  | 9.46E-01 |
| RP11-440D17.3 | -0.02 | 9.22E-01 | 0.01  | 9.46E-01 |
| RP11-467D18.2 | -0.03 | 8.89E-01 | -0.01 | 9.46E-01 |
| RP11-48G14.1  | -0.05 | 8.18E-01 | 0.01  | 9.46E-01 |
| RP11-496H1.1  | 0.07  | 7.13E-01 | 0.01  | 9.46E-01 |
| RP11-528A10.2 | 0.29  | 1.36E-01 | -0.01 | 9.46E-01 |
| RP11-620J15.3 | -0.06 | 7.54E-01 | 0.01  | 9.46E-01 |
| RP11-778D9.13 | -0.16 | 4.14E-01 | 0.01  | 9.46E-01 |
| RP11-92G12.3  | -0.19 | 3.36E-01 | 0.01  | 9.46E-01 |
| RP4-761J14.10 | 0.17  | 3.92E-01 | 0.01  | 9.46E-01 |
| SNHG15        | 0.10  | 6.29E-01 | -0.01 | 9.46E-01 |
| TFG           | 0.07  | 7.30E-01 | 0.01  | 9.46E-01 |
| TMEM251       | 0.20  | 3.00E-01 | -0.01 | 9.46E-01 |
| TSC1          | -0.15 | 4.44E-01 | 0.01  | 9.46E-01 |
| TSPAN18       | 0.06  | 7.51E-01 | -0.01 | 9.46E-01 |
| TSPY26P       | -0.23 | 2.31E-01 | 0.01  | 9.46E-01 |
| UMAD1         | -0.12 | 5.44E-01 | -0.01 | 9.46E-01 |
| XLOC_005502   | -0.01 | 9.40E-01 | -0.01 | 9.46E-01 |
| AC009951.2    | 0.16  | 4.30E-01 | 0.01  | 9.47E-01 |
| ADGRE3        | 0.09  | 6.60E-01 | 0.01  | 9.47E-01 |

|                |       |          |       |          |
|----------------|-------|----------|-------|----------|
| AP3B1          | -0.04 | 8.54E-01 | -0.01 | 9.47E-01 |
| CCDC150        | -0.05 | 8.19E-01 | -0.01 | 9.47E-01 |
| CCDC188        | -0.19 | 3.27E-01 | -0.01 | 9.47E-01 |
| CLTC           | 0.05  | 7.93E-01 | 0.01  | 9.47E-01 |
| CTC-260E6.3    | 0.08  | 6.87E-01 | 0.01  | 9.47E-01 |
| CTD-2293H3.1   | -0.03 | 8.93E-01 | -0.01 | 9.47E-01 |
| CXCL12         | -0.19 | 3.26E-01 | -0.01 | 9.47E-01 |
| DAD1           | -0.02 | 9.23E-01 | -0.01 | 9.47E-01 |
| DEPDC1B        | 0.26  | 1.79E-01 | -0.01 | 9.47E-01 |
| FAM222A        | 0.23  | 2.34E-01 | 0.01  | 9.47E-01 |
| G23125         | 0.02  | 9.24E-01 | 0.01  | 9.47E-01 |
| IGHV1-2        | 0.34  | 7.54E-02 | 0.01  | 9.47E-01 |
| KDM4D          | 0.04  | 8.29E-01 | 0.01  | 9.47E-01 |
| MIR181A2       | -0.31 | 1.08E-01 | 0.01  | 9.47E-01 |
| PRPF19         | 0.10  | 6.04E-01 | -0.01 | 9.47E-01 |
| PSMB4          | 0.08  | 6.93E-01 | 0.01  | 9.47E-01 |
| RBSN           | 0.01  | 9.74E-01 | 0.01  | 9.47E-01 |
| RP11-1008C21.2 | -0.08 | 6.94E-01 | -0.01 | 9.47E-01 |
| RP11-1060G2.2  | -0.09 | 6.41E-01 | -0.01 | 9.47E-01 |
| RP11-468E2.4   | 0.03  | 8.80E-01 | -0.01 | 9.47E-01 |
| RP11-849H4.4   | -0.31 | 1.11E-01 | 0.01  | 9.47E-01 |
| RP3-370M22.8   | -0.04 | 8.21E-01 | 0.01  | 9.47E-01 |
| RQCD1          | 0.13  | 5.04E-01 | 0.01  | 9.47E-01 |
| TH             | -0.11 | 5.92E-01 | 0.01  | 9.47E-01 |
| TTC9C          | -0.04 | 8.45E-01 | 0.01  | 9.47E-01 |
| VWA7           | -0.22 | 2.64E-01 | -0.01 | 9.47E-01 |
| XLOC_005944    | 0.12  | 5.44E-01 | 0.01  | 9.47E-01 |
| ZNF512B        | 0.14  | 4.93E-01 | 0.01  | 9.47E-01 |
| ZSCAN23        | -0.22 | 2.66E-01 | -0.01 | 9.47E-01 |
| AC092168.2     | 0.11  | 5.71E-01 | 0.01  | 9.48E-01 |
| BRWD1-IT1      | -0.08 | 6.95E-01 | -0.01 | 9.48E-01 |
| BX255923.1     | -0.22 | 2.58E-01 | 0.01  | 9.48E-01 |
| CASZ1          | -0.08 | 6.79E-01 | -0.01 | 9.48E-01 |
| CHEK1          | 0.09  | 6.53E-01 | 0.01  | 9.48E-01 |
| COPRS          | 0.03  | 8.78E-01 | -0.01 | 9.48E-01 |
| CPD            | 0.20  | 2.98E-01 | -0.01 | 9.48E-01 |
| CTB-119C2.1    | -0.01 | 9.43E-01 | -0.01 | 9.48E-01 |
| EEF1DP3        | -0.06 | 7.62E-01 | 0.01  | 9.48E-01 |
| FAM120A        | 0.12  | 5.40E-01 | 0.01  | 9.48E-01 |
| FDPS2          | 0.12  | 5.49E-01 | -0.01 | 9.48E-01 |
| G913           | -0.35 | 6.61E-02 | 0.01  | 9.48E-01 |
| MIR3927        | -0.35 | 6.52E-02 | 0.01  | 9.48E-01 |
| MOV10          | 0.09  | 6.35E-01 | -0.01 | 9.48E-01 |
| MRPL40P1       | -0.12 | 5.59E-01 | 0.01  | 9.48E-01 |
| NEK5           | 0.10  | 6.18E-01 | -0.01 | 9.48E-01 |
| RNU6-406P      | 0.09  | 6.34E-01 | 0.01  | 9.48E-01 |
| RNU6-981P      | 0.11  | 5.90E-01 | 0.01  | 9.48E-01 |



|               |       |          |       |          |
|---------------|-------|----------|-------|----------|
| RP1-142L7.5   | -0.40 | 3.51E-02 | 0.01  | 9.48E-01 |
| RP11-326C3.2  | 0.21  | 2.93E-01 | 0.01  | 9.48E-01 |
| RP11-3D4.2    | 0.01  | 9.68E-01 | -0.01 | 9.48E-01 |
| RP11-505K9.5  | -0.10 | 6.02E-01 | 0.01  | 9.48E-01 |
| RPL23AP4      | 0.11  | 5.68E-01 | -0.01 | 9.48E-01 |
| RPS19P3       | 0.24  | 2.23E-01 | 0.01  | 9.48E-01 |
| SNRPG         | 0.04  | 8.52E-01 | 0.01  | 9.48E-01 |
| TMEM252       | -0.29 | 1.31E-01 | -0.01 | 9.48E-01 |
| TMEM98        | -0.12 | 5.38E-01 | 0.01  | 9.48E-01 |
| UNC50         | 0.06  | 7.64E-01 | 0.01  | 9.48E-01 |
| WDR27         | -0.32 | 9.87E-02 | 0.01  | 9.48E-01 |
| WDR45BP1      | -0.01 | 9.63E-01 | 0.01  | 9.48E-01 |
| ZNF215        | 0.11  | 5.83E-01 | 0.01  | 9.48E-01 |
| AC005954.3    | -0.05 | 7.83E-01 | 0.01  | 9.49E-01 |
| AC011524.1    | -0.31 | 1.06E-01 | 0.01  | 9.49E-01 |
| AC092620.3    | 0.04  | 8.36E-01 | -0.01 | 9.49E-01 |
| ACRC          | -0.14 | 4.79E-01 | -0.01 | 9.49E-01 |
| ASGR1         | -0.17 | 3.84E-01 | 0.01  | 9.49E-01 |
| CTD-2026K11.2 | 0.00  | 9.98E-01 | 0.01  | 9.49E-01 |
| EFCAB14       | 0.05  | 8.11E-01 | -0.01 | 9.49E-01 |
| F8            | 0.05  | 7.95E-01 | 0.01  | 9.49E-01 |
| FNDC9         | -0.20 | 3.09E-01 | 0.01  | 9.49E-01 |
| G356          | -0.18 | 3.47E-01 | 0.01  | 9.49E-01 |
| GPBP1L1       | 0.00  | 9.87E-01 | -0.01 | 9.49E-01 |
| GPNMB         | 0.15  | 4.58E-01 | 0.01  | 9.49E-01 |
| LINC00116     | 0.31  | 1.05E-01 | 0.01  | 9.49E-01 |
| MAGI2         | -0.32 | 1.02E-01 | 0.01  | 9.49E-01 |
| MATN2         | 0.11  | 5.83E-01 | -0.01 | 9.49E-01 |
| METTL2B       | -0.02 | 9.18E-01 | 0.01  | 9.49E-01 |
| MTND5P2       | 0.05  | 7.94E-01 | 0.01  | 9.49E-01 |
| NOC2L         | 0.10  | 6.23E-01 | 0.01  | 9.49E-01 |
| POLRMTP1      | -0.01 | 9.78E-01 | -0.01 | 9.49E-01 |
| PVRL4         | -0.05 | 7.84E-01 | -0.01 | 9.49E-01 |
| TBC1D31       | 0.33  | 8.34E-02 | 0.01  | 9.49E-01 |
| TCF3          | 0.19  | 3.46E-01 | -0.01 | 9.49E-01 |
| TNK2          | -0.14 | 4.66E-01 | 0.01  | 9.49E-01 |
| TTC7A         | -0.19 | 3.34E-01 | 0.01  | 9.49E-01 |
| TYMSOS        | 0.17  | 3.79E-01 | -0.01 | 9.49E-01 |
| XXYL1         | 0.39  | 3.76E-02 | -0.01 | 9.49E-01 |
| YLPM1         | -0.02 | 9.35E-01 | -0.01 | 9.49E-01 |
| ZNF543        | 0.27  | 1.73E-01 | -0.01 | 9.49E-01 |
| snoU2_19      | -0.18 | 3.58E-01 | 0.01  | 9.49E-01 |
| AC022558.1    | 0.15  | 4.41E-01 | -0.01 | 9.51E-01 |
| AC159540.1    | -0.23 | 2.31E-01 | -0.01 | 9.51E-01 |
| AL391384.1    | -0.21 | 2.91E-01 | -0.01 | 9.51E-01 |
| CENPP         | -0.11 | 5.64E-01 | -0.01 | 9.51E-01 |
| CRIP3         | -0.11 | 5.92E-01 | -0.01 | 9.51E-01 |

|               |       |          |       |          |
|---------------|-------|----------|-------|----------|
| HDAC1P2       | -0.24 | 2.21E-01 | -0.01 | 9.51E-01 |
| KRTAP9-9      | -0.12 | 5.27E-01 | -0.01 | 9.51E-01 |
| RGS18         | 0.16  | 4.16E-01 | -0.01 | 9.51E-01 |
| RNU6-446P     | -0.02 | 9.26E-01 | -0.01 | 9.51E-01 |
| RP1-79C4.4    | -0.32 | 9.59E-02 | -0.01 | 9.51E-01 |
| RP11-119B16.2 | -0.20 | 3.16E-01 | -0.01 | 9.51E-01 |
| RP11-810D13.1 | -0.11 | 5.71E-01 | -0.01 | 9.51E-01 |
| SNRPEP4       | 0.00  | 9.87E-01 | -0.01 | 9.51E-01 |
| TRAJ4         | 0.18  | 3.66E-01 | -0.01 | 9.51E-01 |
| ATPAF1        | 0.18  | 3.60E-01 | 0.01  | 9.51E-01 |
| CAP2P1        | -0.05 | 7.87E-01 | 0.01  | 9.51E-01 |
| G2136         | 0.06  | 7.81E-01 | 0.01  | 9.51E-01 |
| HNRNPA3P2     | 0.13  | 5.10E-01 | 0.01  | 9.51E-01 |
| IGFBP7        | -0.11 | 5.66E-01 | 0.01  | 9.51E-01 |
| IL18R1        | 0.02  | 9.24E-01 | 0.01  | 9.51E-01 |
| LIMS1         | 0.12  | 5.36E-01 | 0.01  | 9.51E-01 |
| LOXL3         | 0.17  | 4.00E-01 | 0.01  | 9.51E-01 |
| MBOAT1        | -0.03 | 8.81E-01 | 0.01  | 9.51E-01 |
| MIR365A       | 0.16  | 4.19E-01 | 0.01  | 9.51E-01 |
| PHB2          | 0.11  | 5.70E-01 | 0.01  | 9.51E-01 |
| PMS2          | -0.07 | 7.30E-01 | 0.01  | 9.51E-01 |
| PRPF31        | 0.14  | 4.67E-01 | 0.01  | 9.51E-01 |
| RN7SL463P     | -0.07 | 7.15E-01 | 0.01  | 9.51E-01 |
| RP11-110G21.1 | 0.32  | 9.81E-02 | 0.01  | 9.51E-01 |
| RP11-111M22.2 | -0.25 | 2.07E-01 | 0.01  | 9.51E-01 |
| RP11-379C10.4 | -0.04 | 8.49E-01 | 0.01  | 9.51E-01 |
| RP11-46C24.7  | 0.19  | 3.22E-01 | 0.01  | 9.51E-01 |
| RP11-566K19.6 | 0.00  | 9.87E-01 | 0.01  | 9.51E-01 |
| SMDT1         | -0.10 | 6.01E-01 | 0.01  | 9.51E-01 |
| TMEFF2        | -0.12 | 5.42E-01 | 0.01  | 9.51E-01 |
| ZNRF2P1       | 0.08  | 6.78E-01 | 0.01  | 9.51E-01 |
| AF178030.2    | 0.32  | 1.02E-01 | 0.01  | 9.52E-01 |
| AK2           | 0.17  | 3.90E-01 | 0.01  | 9.52E-01 |
| ATN1          | -0.04 | 8.21E-01 | 0.01  | 9.52E-01 |
| ATP5E         | 0.11  | 5.87E-01 | 0.01  | 9.52E-01 |
| ATP5L         | 0.10  | 6.11E-01 | 0.01  | 9.52E-01 |
| DCLRE1C       | 0.20  | 3.20E-01 | 0.01  | 9.52E-01 |
| KATNBL1P2     | -0.01 | 9.70E-01 | 0.01  | 9.52E-01 |
| LINC00596     | -0.04 | 8.27E-01 | 0.01  | 9.52E-01 |
| LINC00630     | -0.25 | 2.04E-01 | 0.01  | 9.52E-01 |
| MAPKAP1       | -0.04 | 8.24E-01 | 0.01  | 9.52E-01 |
| MRPL15        | 0.04  | 8.39E-01 | 0.01  | 9.52E-01 |
| NOXRED1       | -0.12 | 5.55E-01 | 0.01  | 9.52E-01 |
| NRBP2         | 0.06  | 7.62E-01 | 0.01  | 9.52E-01 |
| PIGN          | 0.01  | 9.61E-01 | 0.01  | 9.52E-01 |
| RNF144A-AS1   | -0.23 | 2.36E-01 | 0.01  | 9.52E-01 |
| RP1-257C22.2  | 0.03  | 8.79E-01 | 0.01  | 9.52E-01 |

|                 |       |          |       |          |
|-----------------|-------|----------|-------|----------|
| RP4-607I7.1     | -0.06 | 7.73E-01 | 0.01  | 9.52E-01 |
| TBL1XR1-AS1     | -0.03 | 8.94E-01 | 0.01  | 9.52E-01 |
| XLOC_013178     | -0.06 | 7.80E-01 | 0.01  | 9.52E-01 |
| ATP6AP2         | 0.12  | 5.27E-01 | -0.01 | 9.52E-01 |
| C19orf35        | 0.17  | 3.73E-01 | -0.01 | 9.52E-01 |
| CTC-348L5.1     | 0.21  | 2.91E-01 | -0.01 | 9.52E-01 |
| CTD-3138B18.6   | 0.29  | 1.32E-01 | -0.01 | 9.52E-01 |
| EIF4ENIF1       | -0.14 | 4.72E-01 | -0.01 | 9.52E-01 |
| G9256           | -0.17 | 3.96E-01 | -0.01 | 9.52E-01 |
| NTPCR           | 0.13  | 5.23E-01 | -0.01 | 9.52E-01 |
| OMD             | -0.24 | 2.21E-01 | -0.01 | 9.52E-01 |
| OR7E14P         | -0.04 | 8.22E-01 | -0.01 | 9.52E-01 |
| RNF169          | 0.11  | 5.75E-01 | -0.01 | 9.52E-01 |
| RP1-209B5.2     | -0.18 | 3.54E-01 | -0.01 | 9.52E-01 |
| RP11-248M19.1   | -0.43 | 2.09E-02 | -0.01 | 9.52E-01 |
| RP11-334L9.1    | 0.21  | 2.93E-01 | -0.01 | 9.52E-01 |
| RP11-53B2.3     | -0.14 | 4.93E-01 | -0.01 | 9.52E-01 |
| RP11-73M18.11   | -0.24 | 2.24E-01 | -0.01 | 9.52E-01 |
| RP11-768G7.2    | -0.10 | 6.15E-01 | -0.01 | 9.52E-01 |
| RP11-876N24.4   | 0.05  | 8.11E-01 | -0.01 | 9.52E-01 |
| RP4-539M6.14    | -0.13 | 5.01E-01 | -0.01 | 9.52E-01 |
| RRH             | 0.06  | 7.77E-01 | -0.01 | 9.52E-01 |
| SLC17A7         | -0.16 | 4.19E-01 | -0.01 | 9.52E-01 |
| TEX10           | 0.08  | 6.94E-01 | -0.01 | 9.52E-01 |
| TOP2B           | 0.22  | 2.58E-01 | -0.01 | 9.52E-01 |
| TRIM74          | 0.00  | 9.81E-01 | -0.01 | 9.52E-01 |
| XLOC_001110     | 0.01  | 9.45E-01 | -0.01 | 9.52E-01 |
| AC006042.8      | -0.22 | 2.62E-01 | 0.01  | 9.53E-01 |
| AC091492.2      | -0.06 | 7.46E-01 | 0.01  | 9.53E-01 |
| ATP6V1E1        | -0.06 | 7.62E-01 | 0.01  | 9.53E-01 |
| C19orf12        | 0.23  | 2.46E-01 | 0.01  | 9.53E-01 |
| CPVL            | 0.14  | 4.63E-01 | -0.01 | 9.53E-01 |
| CSNK2B          | 0.01  | 9.75E-01 | -0.01 | 9.53E-01 |
| CSPG4           | -0.29 | 1.33E-01 | -0.01 | 9.53E-01 |
| CTA-363E19.2    | -0.30 | 1.20E-01 | -0.01 | 9.53E-01 |
| CTB-113D17.1    | 0.06  | 7.52E-01 | -0.01 | 9.53E-01 |
| CYP26B1         | -0.27 | 1.57E-01 | -0.01 | 9.53E-01 |
| DDX50           | 0.20  | 3.15E-01 | -0.01 | 9.53E-01 |
| DYNC1I2P1       | -0.14 | 4.91E-01 | 0.01  | 9.53E-01 |
| FAM49B          | 0.36  | 6.18E-02 | -0.01 | 9.53E-01 |
| GNG10           | 0.06  | 7.70E-01 | -0.01 | 9.53E-01 |
| GP1BA           | 0.06  | 7.45E-01 | -0.01 | 9.53E-01 |
| IL36B           | 0.03  | 8.92E-01 | 0.01  | 9.53E-01 |
| KRTAP9-7        | -0.06 | 7.67E-01 | 0.01  | 9.53E-01 |
| LARS2-AS1       | -0.15 | 4.54E-01 | -0.01 | 9.53E-01 |
| LL21NC02-21A1.1 | -0.38 | 4.85E-02 | 0.01  | 9.53E-01 |
| LYRM9           | -0.05 | 8.14E-01 | 0.01  | 9.53E-01 |

|               |       |          |       |          |
|---------------|-------|----------|-------|----------|
| MIR320B2      | -0.13 | 5.25E-01 | 0.01  | 9.53E-01 |
| MRPL9         | 0.05  | 8.12E-01 | 0.01  | 9.53E-01 |
| OR2R1P        | -0.14 | 4.72E-01 | 0.01  | 9.53E-01 |
| PUM3          | 0.22  | 2.63E-01 | 0.01  | 9.53E-01 |
| RBMS1P1       | 0.10  | 6.03E-01 | 0.01  | 9.53E-01 |
| RP11-1113N2.4 | -0.08 | 6.85E-01 | 0.01  | 9.53E-01 |
| RP11-34P13.13 | 0.00  | 9.94E-01 | 0.01  | 9.53E-01 |
| RP4-539M6.21  | -0.11 | 5.74E-01 | -0.01 | 9.53E-01 |
| SCN3B         | -0.22 | 2.71E-01 | -0.01 | 9.53E-01 |
| TNFSF12       | -0.33 | 8.16E-02 | -0.01 | 9.53E-01 |
| TXNDC12       | -0.15 | 4.60E-01 | 0.01  | 9.53E-01 |
| USP17L7       | 0.13  | 5.19E-01 | 0.01  | 9.53E-01 |
| XLOC_003803   | -0.36 | 5.66E-02 | 0.01  | 9.53E-01 |
| XLOC_012016   | -0.32 | 9.81E-02 | -0.01 | 9.53E-01 |
| ZNF165        | -0.09 | 6.57E-01 | -0.01 | 9.53E-01 |
| AC006539.3    | -0.19 | 3.31E-01 | 0.01  | 9.54E-01 |
| AC096579.13   | 0.06  | 7.54E-01 | -0.01 | 9.54E-01 |
| AC098828.2    | 0.00  | 9.92E-01 | 0.01  | 9.54E-01 |
| ADGRG6        | 0.07  | 7.36E-01 | -0.01 | 9.54E-01 |
| ADGRV1        | 0.12  | 5.46E-01 | 0.01  | 9.54E-01 |
| AGFG1         | 0.30  | 1.20E-01 | -0.01 | 9.54E-01 |
| CTB-50L17.16  | -0.09 | 6.46E-01 | -0.01 | 9.54E-01 |
| DPP9-AS1      | -0.03 | 8.99E-01 | 0.01  | 9.54E-01 |
| ECI1          | -0.06 | 7.68E-01 | 0.01  | 9.54E-01 |
| EML6          | 0.00  | 9.97E-01 | 0.01  | 9.54E-01 |
| GALR1         | -0.10 | 6.11E-01 | -0.01 | 9.54E-01 |
| GAS2L3        | 0.02  | 9.27E-01 | 0.01  | 9.54E-01 |
| GSTT2B        | -0.10 | 6.26E-01 | -0.01 | 9.54E-01 |
| JARID2-AS1    | 0.02  | 9.31E-01 | -0.01 | 9.54E-01 |
| KIF4A         | 0.07  | 7.22E-01 | 0.01  | 9.54E-01 |
| KLHL17        | -0.06 | 7.81E-01 | 0.01  | 9.54E-01 |
| MBLAC1        | 0.28  | 1.44E-01 | -0.01 | 9.54E-01 |
| MIR4432HG     | -0.10 | 6.21E-01 | 0.01  | 9.54E-01 |
| MRPL24        | 0.03  | 8.78E-01 | 0.01  | 9.54E-01 |
| MTX3          | 0.00  | 9.88E-01 | 0.01  | 9.54E-01 |
| NDUFA6        | -0.11 | 5.82E-01 | -0.01 | 9.54E-01 |
| PCP2          | 0.16  | 4.03E-01 | -0.01 | 9.54E-01 |
| RN7SL409P     | 0.26  | 1.88E-01 | -0.01 | 9.54E-01 |
| RP11-11N9.4   | -0.31 | 1.08E-01 | 0.01  | 9.54E-01 |
| RP11-155O18.6 | -0.04 | 8.56E-01 | -0.01 | 9.54E-01 |
| RP11-324D17.2 | -0.16 | 4.13E-01 | 0.01  | 9.54E-01 |
| RP11-332H18.5 | -0.08 | 6.89E-01 | 0.01  | 9.54E-01 |
| RP11-556O9.3  | -0.31 | 1.05E-01 | 0.01  | 9.54E-01 |
| RP11-73M7.6   | -0.48 | 1.05E-02 | -0.01 | 9.54E-01 |
| RP3-426I6.5   | -0.33 | 8.37E-02 | -0.01 | 9.54E-01 |
| RP4-791M13.3  | 0.13  | 5.22E-01 | -0.01 | 9.54E-01 |
| RPL23AP95     | -0.18 | 3.72E-01 | -0.01 | 9.54E-01 |

|                       |       |          |       |          |
|-----------------------|-------|----------|-------|----------|
| <b>SDF2L1</b>         | -0.01 | 9.63E-01 | -0.01 | 9.54E-01 |
| <b>SERPINH1P1</b>     | -0.17 | 3.89E-01 | 0.01  | 9.54E-01 |
| <b>SNORD11</b>        | -0.09 | 6.65E-01 | -0.01 | 9.54E-01 |
| <b>TBX2-AS1</b>       | -0.15 | 4.58E-01 | 0.01  | 9.54E-01 |
| <b>TP73-AS1</b>       | 0.15  | 4.58E-01 | -0.01 | 9.54E-01 |
| <b>ZNF503-AS1</b>     | 0.15  | 4.36E-01 | -0.01 | 9.54E-01 |
| <b>ZNF611</b>         | -0.04 | 8.42E-01 | -0.01 | 9.54E-01 |
| <b>ATE1-AS1</b>       | -0.02 | 9.02E-01 | -0.01 | 9.55E-01 |
| <b>CLN8</b>           | 0.21  | 2.75E-01 | -0.01 | 9.55E-01 |
| <b>FANCA</b>          | -0.13 | 5.22E-01 | -0.01 | 9.55E-01 |
| <b>FOXI1</b>          | -0.24 | 2.14E-01 | -0.01 | 9.55E-01 |
| <b>GTDC1</b>          | 0.04  | 8.36E-01 | -0.01 | 9.55E-01 |
| <b>LIMD1-AS1</b>      | -0.16 | 4.30E-01 | -0.01 | 9.55E-01 |
| <b>MYO6</b>           | -0.24 | 2.10E-01 | -0.01 | 9.55E-01 |
| <b>NEO1</b>           | 0.10  | 6.30E-01 | -0.01 | 9.55E-01 |
| <b>RP11-390F4.6</b>   | 0.16  | 4.12E-01 | -0.01 | 9.55E-01 |
| <b>RP13-16H11.8</b>   | 0.10  | 6.19E-01 | -0.01 | 9.55E-01 |
| <b>RP3-395M20.12</b>  | -0.17 | 3.93E-01 | -0.01 | 9.55E-01 |
| <b>STAMBPL1</b>       | 0.36  | 6.11E-02 | -0.01 | 9.55E-01 |
| <b>TMEM106C</b>       | -0.01 | 9.46E-01 | -0.01 | 9.55E-01 |
| <b>TMEM132E</b>       | -0.04 | 8.21E-01 | -0.01 | 9.55E-01 |
| <b>TYMS</b>           | -0.21 | 2.77E-01 | -0.01 | 9.55E-01 |
| <b>ZNF514</b>         | -0.19 | 3.34E-01 | -0.01 | 9.55E-01 |
| <b>ZSCAN16-AS1</b>    | -0.12 | 5.58E-01 | -0.01 | 9.55E-01 |
| <b>C11orf1</b>        | -0.05 | 7.94E-01 | 0.01  | 9.55E-01 |
| <b>C1orf174</b>       | 0.07  | 7.22E-01 | 0.01  | 9.55E-01 |
| <b>CALR</b>           | 0.25  | 2.03E-01 | 0.01  | 9.55E-01 |
| <b>CCDC151</b>        | -0.16 | 4.24E-01 | 0.01  | 9.55E-01 |
| <b>DDX55</b>          | -0.23 | 2.41E-01 | 0.01  | 9.55E-01 |
| <b>FAM225A</b>        | 0.10  | 6.12E-01 | 0.01  | 9.55E-01 |
| <b>G26249</b>         | 0.18  | 3.69E-01 | 0.01  | 9.55E-01 |
| <b>GOLGA8H</b>        | -0.06 | 7.51E-01 | 0.01  | 9.55E-01 |
| <b>GTF2IRD2P1</b>     | -0.18 | 3.57E-01 | 0.01  | 9.55E-01 |
| <b>MRGBP</b>          | 0.15  | 4.49E-01 | 0.01  | 9.55E-01 |
| <b>MTND6P5</b>        | -0.07 | 7.36E-01 | 0.01  | 9.55E-01 |
| <b>RNU6-135P</b>      | 0.10  | 6.26E-01 | 0.01  | 9.55E-01 |
| <b>RNU6-353P</b>      | 0.14  | 4.63E-01 | 0.01  | 9.55E-01 |
| <b>RP1-43E13.2</b>    | -0.19 | 3.22E-01 | 0.01  | 9.55E-01 |
| <b>RP11-110L15.2</b>  | -0.19 | 3.29E-01 | 0.01  | 9.55E-01 |
| <b>RP11-131M11.3</b>  | -0.17 | 3.75E-01 | 0.01  | 9.55E-01 |
| <b>RP11-274B21.10</b> | -0.04 | 8.43E-01 | 0.01  | 9.55E-01 |
| <b>RP11-359J14.2</b>  | -0.29 | 1.34E-01 | 0.01  | 9.55E-01 |
| <b>RP11-527F13.1</b>  | -0.11 | 5.75E-01 | 0.01  | 9.55E-01 |
| <b>RPGRIP1</b>        | 0.07  | 7.42E-01 | 0.01  | 9.55E-01 |
| <b>RTEL1P1</b>        | -0.25 | 1.94E-01 | 0.01  | 9.55E-01 |
| <b>YARS2</b>          | 0.13  | 5.10E-01 | 0.01  | 9.55E-01 |
| <b>AC008781.7</b>     | 0.02  | 9.14E-01 | -0.01 | 9.57E-01 |

|                       |       |          |       |          |
|-----------------------|-------|----------|-------|----------|
| <b>AC009120.4</b>     | -0.13 | 5.22E-01 | -0.01 | 9.57E-01 |
| <b>C2orf27A</b>       | 0.21  | 2.85E-01 | -0.01 | 9.57E-01 |
| <b>C7orf31</b>        | 0.28  | 1.51E-01 | 0.01  | 9.57E-01 |
| <b>CTB-13F3.1</b>     | 0.00  | 9.96E-01 | 0.01  | 9.57E-01 |
| <b>CTC-559E9.9</b>    | -0.16 | 4.26E-01 | -0.01 | 9.57E-01 |
| <b>CYB5R1</b>         | 0.16  | 4.24E-01 | -0.01 | 9.57E-01 |
| <b>EMC7</b>           | 0.00  | 9.94E-01 | -0.01 | 9.57E-01 |
| <b>ENPP7P7</b>        | -0.14 | 4.66E-01 | -0.01 | 9.57E-01 |
| <b>FH</b>             | 0.03  | 8.79E-01 | 0.01  | 9.57E-01 |
| <b>GGNBP1</b>         | -0.06 | 7.78E-01 | -0.01 | 9.57E-01 |
| <b>KISS1R</b>         | 0.14  | 4.79E-01 | -0.01 | 9.57E-01 |
| <b>LXN</b>            | -0.20 | 3.13E-01 | -0.01 | 9.57E-01 |
| <b>METTL17</b>        | -0.04 | 8.48E-01 | -0.01 | 9.57E-01 |
| <b>MIR621</b>         | -0.04 | 8.52E-01 | -0.01 | 9.57E-01 |
| <b>MT-ND5</b>         | 0.22  | 2.52E-01 | -0.01 | 9.57E-01 |
| <b>NPM3</b>           | 0.13  | 5.26E-01 | 0.01  | 9.57E-01 |
| <b>PABPC1P3</b>       | -0.39 | 3.92E-02 | -0.01 | 9.57E-01 |
| <b>RASGEF1C</b>       | -0.16 | 4.04E-01 | -0.01 | 9.57E-01 |
| <b>RP11-304L19.11</b> | -0.17 | 3.86E-01 | -0.01 | 9.57E-01 |
| <b>RP11-385D13.3</b>  | -0.05 | 8.09E-01 | 0.01  | 9.57E-01 |
| <b>RP11-506H20.1</b>  | 0.16  | 4.24E-01 | 0.01  | 9.57E-01 |
| <b>RP11-62C7.2</b>    | 0.21  | 2.81E-01 | -0.01 | 9.57E-01 |
| <b>RP4-613B23.1</b>   | 0.15  | 4.39E-01 | 0.01  | 9.57E-01 |
| <b>SAPCD2</b>         | 0.01  | 9.61E-01 | -0.01 | 9.57E-01 |
| <b>SLC27A1</b>        | -0.08 | 6.78E-01 | 0.01  | 9.57E-01 |
| <b>SPDYE1</b>         | -0.16 | 4.27E-01 | -0.01 | 9.57E-01 |
| <b>STARD9</b>         | -0.22 | 2.70E-01 | 0.01  | 9.57E-01 |
| <b>SUGT1P2</b>        | -0.31 | 1.06E-01 | -0.01 | 9.57E-01 |
| <b>SUPT20H</b>        | -0.16 | 4.25E-01 | -0.01 | 9.57E-01 |
| <b>TGOLN2</b>         | -0.09 | 6.65E-01 | 0.01  | 9.57E-01 |
| <b>TSPAN14</b>        | 0.19  | 3.23E-01 | 0.01  | 9.57E-01 |
| <b>UBFD1</b>          | 0.13  | 5.01E-01 | -0.01 | 9.57E-01 |
| <b>UCN</b>            | -0.13 | 5.13E-01 | 0.01  | 9.57E-01 |
| <b>ZNF385B</b>        | -0.25 | 1.95E-01 | 0.01  | 9.57E-01 |
| <b>ACADS</b>          | 0.48  | 9.14E-03 | -0.01 | 9.58E-01 |
| <b>AKNA</b>           | 0.06  | 7.71E-01 | 0.01  | 9.58E-01 |
| <b>BEGAIN</b>         | -0.03 | 8.99E-01 | -0.01 | 9.58E-01 |
| <b>CTA-984G1.5</b>    | 0.18  | 3.58E-01 | -0.01 | 9.58E-01 |
| <b>CTC-575D19.1</b>   | -0.17 | 3.81E-01 | -0.01 | 9.58E-01 |
| <b>CTD-2349P21.11</b> | -0.02 | 9.04E-01 | -0.01 | 9.58E-01 |
| <b>CTD-2587H24.10</b> | -0.01 | 9.71E-01 | -0.01 | 9.58E-01 |
| <b>FDX1P1</b>         | 0.33  | 8.95E-02 | 0.01  | 9.58E-01 |
| <b>HSD17B4</b>        | 0.19  | 3.24E-01 | -0.01 | 9.58E-01 |
| <b>KDELC1</b>         | 0.05  | 8.04E-01 | -0.01 | 9.58E-01 |
| <b>KRT83</b>          | -0.25 | 1.96E-01 | -0.01 | 9.58E-01 |
| <b>LINC01021</b>      | -0.01 | 9.50E-01 | 0.01  | 9.58E-01 |
| <b>MFAP3L</b>         | 0.01  | 9.55E-01 | 0.01  | 9.58E-01 |

|                |       |          |       |          |
|----------------|-------|----------|-------|----------|
| MRPS18A        | 0.07  | 7.19E-01 | 0.01  | 9.58E-01 |
| NME2           | 0.00  | 9.98E-01 | 0.01  | 9.58E-01 |
| NOP16          | 0.20  | 3.12E-01 | 0.01  | 9.58E-01 |
| PPIH           | 0.21  | 2.90E-01 | -0.01 | 9.58E-01 |
| PXDC1          | 0.03  | 8.76E-01 | -0.01 | 9.58E-01 |
| RNA5SP268      | -0.12 | 5.58E-01 | 0.01  | 9.58E-01 |
| RP11-13J8.1    | -0.22 | 2.58E-01 | -0.01 | 9.58E-01 |
| RP11-313P22.1  | 0.15  | 4.39E-01 | -0.01 | 9.58E-01 |
| RP11-381N20.2  | -0.02 | 9.36E-01 | -0.01 | 9.58E-01 |
| RP11-415I12.3  | 0.12  | 5.51E-01 | 0.01  | 9.58E-01 |
| RP11-544M22.8  | -0.08 | 6.77E-01 | -0.01 | 9.58E-01 |
| RP11-703I16.1  | 0.06  | 7.80E-01 | 0.01  | 9.58E-01 |
| RP11-727F15.13 | -0.09 | 6.57E-01 | -0.01 | 9.58E-01 |
| RPL10          | 0.18  | 3.58E-01 | 0.01  | 9.58E-01 |
| SCIMP          | 0.25  | 1.94E-01 | -0.01 | 9.58E-01 |
| SEC22C         | 0.12  | 5.30E-01 | -0.01 | 9.58E-01 |
| SNX15          | -0.06 | 7.46E-01 | -0.01 | 9.58E-01 |
| STMN1P1        | 0.15  | 4.59E-01 | -0.01 | 9.58E-01 |
| TCF4-AS1       | 0.14  | 4.64E-01 | -0.01 | 9.58E-01 |
| THOC5          | -0.03 | 8.81E-01 | 0.01  | 9.58E-01 |
| TMIGD3         | 0.21  | 2.81E-01 | 0.01  | 9.58E-01 |
| TNFRSF12A      | 0.01  | 9.47E-01 | -0.01 | 9.58E-01 |
| TOR1AIP1       | 0.18  | 3.57E-01 | -0.01 | 9.58E-01 |
| UBTF           | -0.28 | 1.44E-01 | -0.01 | 9.58E-01 |
| VAPA           | 0.24  | 2.11E-01 | -0.01 | 9.58E-01 |
| WWTR1-AS1      | -0.20 | 3.03E-01 | 0.01  | 9.58E-01 |
| XLOC_001124    | -0.19 | 3.39E-01 | 0.01  | 9.58E-01 |
| XLOC_008618    | -0.35 | 6.89E-02 | -0.01 | 9.58E-01 |
| XLOC_011805    | -0.13 | 5.15E-01 | 0.01  | 9.58E-01 |
| AASDH          | 0.06  | 7.57E-01 | -0.01 | 9.59E-01 |
| AIDA           | -0.06 | 7.75E-01 | -0.01 | 9.59E-01 |
| AMN1           | 0.25  | 1.99E-01 | 0.01  | 9.59E-01 |
| ATP2B3         | -0.38 | 4.85E-02 | -0.01 | 9.59E-01 |
| BSG            | 0.21  | 2.89E-01 | 0.01  | 9.59E-01 |
| CCDC67         | 0.12  | 5.36E-01 | 0.01  | 9.59E-01 |
| CLSPN          | -0.03 | 8.93E-01 | -0.01 | 9.59E-01 |
| COL3A1         | -0.05 | 7.95E-01 | -0.01 | 9.59E-01 |
| COMMD3         | -0.10 | 5.96E-01 | -0.01 | 9.59E-01 |
| CTB-129P6.7    | -0.14 | 4.66E-01 | 0.01  | 9.59E-01 |
| FAM168B        | 0.27  | 1.72E-01 | 0.01  | 9.59E-01 |
| FHIT           | -0.15 | 4.34E-01 | 0.01  | 9.59E-01 |
| FOXQ1          | -0.11 | 5.73E-01 | 0.01  | 9.59E-01 |
| HIST1H2AM      | -0.05 | 7.89E-01 | 0.01  | 9.59E-01 |
| HIST1H3J       | -0.05 | 7.92E-01 | 0.01  | 9.59E-01 |
| KIAA0907       | -0.18 | 3.52E-01 | -0.01 | 9.59E-01 |
| LPCAT4         | -0.18 | 3.64E-01 | -0.01 | 9.59E-01 |
| LY75           | 0.09  | 6.62E-01 | 0.01  | 9.59E-01 |

|               |       |          |       |          |
|---------------|-------|----------|-------|----------|
| NCL           | 0.02  | 9.15E-01 | -0.01 | 9.59E-01 |
| NKX3-2        | 0.06  | 7.51E-01 | -0.01 | 9.59E-01 |
| OTUD7A        | -0.16 | 4.04E-01 | 0.01  | 9.59E-01 |
| PFN2          | 0.08  | 6.98E-01 | -0.01 | 9.59E-01 |
| PUS7L         | 0.20  | 2.99E-01 | 0.01  | 9.59E-01 |
| RBM34         | 0.34  | 7.64E-02 | 0.01  | 9.59E-01 |
| RECK          | -0.14 | 4.80E-01 | -0.01 | 9.59E-01 |
| REEP5         | -0.01 | 9.42E-01 | 0.01  | 9.59E-01 |
| RNU1-85P      | -0.10 | 6.30E-01 | 0.01  | 9.59E-01 |
| RP11-173B14.4 | 0.15  | 4.58E-01 | -0.01 | 9.59E-01 |
| RP11-443B20.1 | 0.32  | 9.42E-02 | 0.01  | 9.59E-01 |
| RP11-81A22.5  | 0.01  | 9.68E-01 | -0.01 | 9.59E-01 |
| RPL12P24      | 0.06  | 7.72E-01 | 0.01  | 9.59E-01 |
| RPL7P17       | -0.33 | 8.16E-02 | 0.01  | 9.59E-01 |
| RTEL1         | -0.48 | 9.70E-03 | 0.01  | 9.59E-01 |
| SF3B6         | 0.15  | 4.37E-01 | -0.01 | 9.59E-01 |
| SNRPD2        | -0.02 | 9.06E-01 | -0.01 | 9.59E-01 |
| SPATA20       | -0.27 | 1.66E-01 | 0.01  | 9.59E-01 |
| SPDYE2        | -0.21 | 2.82E-01 | 0.01  | 9.59E-01 |
| SRGAP3-AS2    | -0.07 | 7.10E-01 | 0.01  | 9.59E-01 |
| TMEM219       | -0.15 | 4.54E-01 | 0.01  | 9.59E-01 |
| TPM3          | -0.01 | 9.56E-01 | -0.01 | 9.59E-01 |
| XLOC_003364   | -0.04 | 8.33E-01 | -0.01 | 9.59E-01 |
| ZBED3         | -0.01 | 9.70E-01 | 0.01  | 9.59E-01 |
| ZNF197-AS1    | 0.06  | 7.77E-01 | 0.01  | 9.59E-01 |
| AEBP1         | -0.21 | 2.81E-01 | -0.01 | 9.60E-01 |
| C8orf37-AS1   | -0.07 | 7.30E-01 | -0.01 | 9.60E-01 |
| CTNNA3        | -0.08 | 6.89E-01 | 0.01  | 9.60E-01 |
| FAM225B       | -0.25 | 1.92E-01 | -0.01 | 9.60E-01 |
| FOLR3         | -0.05 | 8.18E-01 | 0.01  | 9.60E-01 |
| HIST1H2BD     | -0.11 | 5.85E-01 | 0.01  | 9.60E-01 |
| HMG5          | -0.29 | 1.36E-01 | -0.01 | 9.60E-01 |
| LINC00032     | -0.17 | 3.74E-01 | 0.01  | 9.60E-01 |
| LINC00511     | -0.01 | 9.55E-01 | -0.01 | 9.60E-01 |
| MRPL52        | 0.13  | 5.26E-01 | 0.01  | 9.60E-01 |
| ORAI2         | -0.12 | 5.44E-01 | 0.01  | 9.60E-01 |
| PLA2G4B       | 0.18  | 3.53E-01 | 0.01  | 9.60E-01 |
| PTPDC1        | -0.14 | 4.88E-01 | 0.01  | 9.60E-01 |
| R3HCC1        | 0.00  | 9.92E-01 | 0.01  | 9.60E-01 |
| RASSF5        | -0.03 | 8.90E-01 | 0.01  | 9.60E-01 |
| RIC1          | 0.24  | 2.21E-01 | -0.01 | 9.60E-01 |
| RNU6-1318P    | -0.27 | 1.65E-01 | -0.01 | 9.60E-01 |
| ROR1          | -0.30 | 1.15E-01 | -0.01 | 9.60E-01 |
| RP1-7G5.5     | -0.01 | 9.71E-01 | 0.01  | 9.60E-01 |
| RP11-402J7.2  | 0.23  | 2.47E-01 | -0.01 | 9.60E-01 |
| RP11-53B2.4   | -0.02 | 9.14E-01 | -0.01 | 9.60E-01 |
| RP11-707P17.1 | 0.22  | 2.63E-01 | -0.01 | 9.60E-01 |



|                |       |          |       |          |
|----------------|-------|----------|-------|----------|
| RP11-713H12.2  | -0.19 | 3.34E-01 | -0.01 | 9.60E-01 |
| RP3-437C15.1   | -0.23 | 2.30E-01 | -0.01 | 9.60E-01 |
| RP6-91H8.3     | 0.33  | 9.12E-02 | -0.01 | 9.60E-01 |
| RPARP-AS1      | 0.07  | 7.29E-01 | 0.01  | 9.60E-01 |
| RPL31P20       | 0.17  | 3.97E-01 | -0.01 | 9.60E-01 |
| SNX4           | 0.09  | 6.36E-01 | 0.01  | 9.60E-01 |
| SPC24          | 0.22  | 2.66E-01 | 0.01  | 9.60E-01 |
| SPOCD1         | -0.24 | 2.22E-01 | 0.01  | 9.60E-01 |
| SPRYD3         | -0.11 | 5.66E-01 | 0.01  | 9.60E-01 |
| SRRM1P3        | -0.20 | 3.02E-01 | -0.01 | 9.60E-01 |
| STX1B          | 0.21  | 2.79E-01 | 0.01  | 9.60E-01 |
| TRAJ19         | -0.10 | 6.27E-01 | -0.01 | 9.60E-01 |
| XLOC_011429    | -0.17 | 3.90E-01 | -0.01 | 9.60E-01 |
| ZNF146         | 0.13  | 5.02E-01 | -0.01 | 9.60E-01 |
| ADGB           | -0.36 | 5.84E-02 | -0.01 | 9.61E-01 |
| ARHGAP21       | -0.05 | 8.15E-01 | -0.01 | 9.61E-01 |
| BNIP3P11       | 0.19  | 3.27E-01 | -0.01 | 9.61E-01 |
| CD99L2         | -0.14 | 4.91E-01 | 0.01  | 9.61E-01 |
| CINP           | 0.09  | 6.50E-01 | 0.01  | 9.61E-01 |
| CLPTM1L        | 0.12  | 5.34E-01 | -0.01 | 9.61E-01 |
| CTC-254B4.1    | -0.03 | 8.65E-01 | 0.01  | 9.61E-01 |
| CYB5B          | 0.16  | 4.09E-01 | -0.01 | 9.61E-01 |
| EPHA5-AS1      | -0.48 | 1.01E-02 | -0.01 | 9.61E-01 |
| FAM200B        | 0.04  | 8.26E-01 | 0.01  | 9.61E-01 |
| GPR156         | -0.11 | 5.63E-01 | -0.01 | 9.61E-01 |
| HSBP1L1        | -0.21 | 2.83E-01 | 0.01  | 9.61E-01 |
| HSP90AB3P      | 0.09  | 6.39E-01 | 0.01  | 9.61E-01 |
| LINC00319      | 0.04  | 8.30E-01 | 0.01  | 9.61E-01 |
| MRPL14         | 0.10  | 6.22E-01 | 0.01  | 9.61E-01 |
| MSH6           | -0.07 | 7.18E-01 | 0.01  | 9.61E-01 |
| PARP11         | -0.14 | 4.80E-01 | -0.01 | 9.61E-01 |
| POP7           | -0.08 | 6.93E-01 | -0.01 | 9.61E-01 |
| PRO1804        | -0.12 | 5.35E-01 | -0.01 | 9.61E-01 |
| RAD9A          | -0.09 | 6.32E-01 | -0.01 | 9.61E-01 |
| RECQL4         | -0.05 | 8.02E-01 | 0.01  | 9.61E-01 |
| RN7SL378P      | -0.17 | 3.98E-01 | -0.01 | 9.61E-01 |
| RNA5SP33       | 0.05  | 7.97E-01 | -0.01 | 9.61E-01 |
| RNU6-890P      | 0.01  | 9.72E-01 | 0.01  | 9.61E-01 |
| RP11-360F5.1   | 0.13  | 5.01E-01 | -0.01 | 9.61E-01 |
| RP11-540O11.8  | -0.12 | 5.56E-01 | -0.01 | 9.61E-01 |
| RP11-563J2.2   | -0.18 | 3.53E-01 | -0.01 | 9.61E-01 |
| RP11-693M3.1   | 0.01  | 9.67E-01 | 0.01  | 9.61E-01 |
| RP11-793H13.12 | -0.15 | 4.34E-01 | 0.01  | 9.61E-01 |
| RP11-982M15.5  | 0.23  | 2.43E-01 | -0.01 | 9.61E-01 |
| RSBN1L         | 0.29  | 1.35E-01 | 0.01  | 9.61E-01 |
| SAP30L-AS1     | 0.33  | 8.67E-02 | 0.01  | 9.61E-01 |
| SLC25A15P2     | -0.21 | 2.81E-01 | 0.01  | 9.61E-01 |

|              |       |          |       |          |
|--------------|-------|----------|-------|----------|
| SLC26A2      | 0.07  | 7.20E-01 | -0.01 | 9.61E-01 |
| SNAPC5       | -0.08 | 6.88E-01 | 0.01  | 9.61E-01 |
| TCTEX1D1     | 0.07  | 7.05E-01 | -0.01 | 9.61E-01 |
| TTC34        | -0.04 | 8.24E-01 | -0.01 | 9.61E-01 |
| ZNF333       | -0.03 | 8.99E-01 | -0.01 | 9.61E-01 |
| ZNF436       | 0.08  | 6.96E-01 | 0.01  | 9.61E-01 |
| ZNF74        | 0.13  | 4.95E-01 | -0.01 | 9.61E-01 |
| ADAM9        | 0.22  | 2.68E-01 | -0.01 | 9.63E-01 |
| ARHGAP31-AS1 | -0.05 | 7.83E-01 | 0.01  | 9.63E-01 |
| C2CD4D       | -0.31 | 1.14E-01 | -0.01 | 9.63E-01 |
| CD1A         | 0.10  | 6.27E-01 | -0.01 | 9.63E-01 |
| CHAC2        | 0.11  | 5.70E-01 | 0.01  | 9.63E-01 |
| COL4A2-AS2   | -0.07 | 7.06E-01 | -0.01 | 9.63E-01 |
| CRTC1        | -0.03 | 8.98E-01 | -0.01 | 9.63E-01 |
| DCUN1D1      | -0.11 | 5.92E-01 | 0.01  | 9.63E-01 |
| E2F3P1       | 0.02  | 9.31E-01 | -0.01 | 9.63E-01 |
| GAREML       | -0.32 | 1.01E-01 | -0.01 | 9.63E-01 |
| GPR61        | 0.31  | 1.11E-01 | -0.01 | 9.63E-01 |
| HNRNPK       | 0.24  | 2.20E-01 | 0.01  | 9.63E-01 |
| KCNU1        | 0.06  | 7.68E-01 | 0.01  | 9.63E-01 |
| LINC00518    | -0.05 | 8.13E-01 | -0.01 | 9.63E-01 |
| MAP3K12      | -0.10 | 6.24E-01 | -0.01 | 9.63E-01 |
| MIR27A       | -0.09 | 6.40E-01 | -0.01 | 9.63E-01 |
| MIR548A3     | -0.22 | 2.65E-01 | 0.01  | 9.63E-01 |
| MIRLET7DHG   | -0.26 | 1.84E-01 | 0.01  | 9.63E-01 |
| MST1L        | -0.11 | 5.68E-01 | -0.01 | 9.63E-01 |
| RP4-633I8.4  | 0.17  | 3.81E-01 | 0.01  | 9.63E-01 |
| SRRD         | 0.07  | 7.31E-01 | -0.01 | 9.63E-01 |
| THAP11       | 0.03  | 8.99E-01 | -0.01 | 9.63E-01 |
| TMX2         | 0.30  | 1.20E-01 | 0.01  | 9.63E-01 |
| XCL2         | 0.15  | 4.49E-01 | -0.01 | 9.63E-01 |
| AC016586.1   | -0.02 | 9.09E-01 | 0.01  | 9.64E-01 |
| AC109826.1   | -0.31 | 1.04E-01 | 0.01  | 9.64E-01 |
| AC112198.1   | -0.13 | 4.97E-01 | 0.01  | 9.64E-01 |
| AC145110.1   | -0.14 | 4.68E-01 | -0.01 | 9.64E-01 |
| AL133318.1   | 0.00  | 9.85E-01 | -0.01 | 9.64E-01 |
| ARFGEF1      | -0.01 | 9.51E-01 | -0.01 | 9.64E-01 |
| C19orf48     | 0.10  | 6.03E-01 | 0.01  | 9.64E-01 |
| CIRBP-AS1    | 0.00  | 9.83E-01 | 0.01  | 9.64E-01 |
| DTNA         | -0.06 | 7.71E-01 | -0.01 | 9.64E-01 |
| EMILIN1      | -0.13 | 5.12E-01 | -0.01 | 9.64E-01 |
| GCSAML       | 0.16  | 4.07E-01 | -0.01 | 9.64E-01 |
| GUK1         | 0.15  | 4.33E-01 | -0.01 | 9.64E-01 |
| HIST1H3C     | 0.03  | 8.64E-01 | 0.01  | 9.64E-01 |
| HSD17B7P2    | 0.15  | 4.54E-01 | 0.01  | 9.64E-01 |
| HUS1         | 0.15  | 4.53E-01 | -0.01 | 9.64E-01 |
| KLHDC1       | -0.36 | 6.26E-02 | 0.01  | 9.64E-01 |

|               |       |          |       |          |
|---------------|-------|----------|-------|----------|
| KLHL36        | -0.11 | 5.68E-01 | 0.01  | 9.64E-01 |
| KRTAP9-3      | -0.19 | 3.41E-01 | -0.01 | 9.64E-01 |
| MED4-AS1      | -0.07 | 7.36E-01 | -0.01 | 9.64E-01 |
| METTL3        | -0.08 | 6.68E-01 | 0.01  | 9.64E-01 |
| MIR4728       | -0.04 | 8.31E-01 | -0.01 | 9.64E-01 |
| NINJ1         | -0.13 | 5.12E-01 | -0.01 | 9.64E-01 |
| OGFRP1        | -0.01 | 9.56E-01 | 0.01  | 9.64E-01 |
| PHKA1P1       | -0.21 | 2.83E-01 | -0.01 | 9.64E-01 |
| POLHP1        | 0.40  | 3.56E-02 | -0.01 | 9.64E-01 |
| PRR14L        | -0.02 | 9.32E-01 | 0.01  | 9.64E-01 |
| PRR36         | 0.01  | 9.60E-01 | 0.01  | 9.64E-01 |
| RBPJP7        | 0.00  | 9.89E-01 | 0.01  | 9.64E-01 |
| RECQL5        | -0.20 | 3.11E-01 | 0.01  | 9.64E-01 |
| RP11-642D21.1 | 0.11  | 5.92E-01 | 0.01  | 9.64E-01 |
| RP11-713N11.5 | -0.15 | 4.43E-01 | 0.01  | 9.64E-01 |
| RPL15P18      | -0.18 | 3.55E-01 | 0.01  | 9.64E-01 |
| RXFP1         | -0.24 | 2.22E-01 | 0.01  | 9.64E-01 |
| SMIM19        | 0.19  | 3.38E-01 | 0.01  | 9.64E-01 |
| SNRNP70       | -0.04 | 8.49E-01 | 0.01  | 9.64E-01 |
| TBL1X         | 0.24  | 2.23E-01 | 0.01  | 9.64E-01 |
| XLOC_000978   | 0.13  | 5.01E-01 | 0.01  | 9.64E-01 |
| ZCCHC24       | -0.20 | 3.05E-01 | -0.01 | 9.64E-01 |
| AC009495.2    | 0.13  | 4.95E-01 | -0.01 | 9.65E-01 |
| ADD2          | -0.23 | 2.38E-01 | 0.01  | 9.65E-01 |
| AP000473.8    | 0.05  | 8.00E-01 | 0.01  | 9.65E-01 |
| ATP1B1        | 0.34  | 7.79E-02 | -0.01 | 9.65E-01 |
| CCDC102B      | -0.12 | 5.29E-01 | -0.01 | 9.65E-01 |
| CST2          | -0.22 | 2.69E-01 | -0.01 | 9.65E-01 |
| DCAF12L2      | -0.40 | 3.44E-02 | -0.01 | 9.65E-01 |
| DDX3X         | -0.02 | 9.00E-01 | 0.01  | 9.65E-01 |
| DRICH1        | 0.05  | 7.86E-01 | -0.01 | 9.65E-01 |
| G4016         | -0.25 | 2.07E-01 | 0.01  | 9.65E-01 |
| HK2P1         | 0.09  | 6.62E-01 | -0.01 | 9.65E-01 |
| HNRNPKP4      | -0.02 | 9.08E-01 | 0.01  | 9.65E-01 |
| IL1RL2        | 0.18  | 3.49E-01 | 0.01  | 9.65E-01 |
| INTS4P1       | -0.12 | 5.42E-01 | -0.01 | 9.65E-01 |
| IQCK          | -0.08 | 6.69E-01 | -0.01 | 9.65E-01 |
| ITPK1-AS1     | 0.05  | 8.09E-01 | -0.01 | 9.65E-01 |
| LAMTOR5P1     | -0.08 | 6.90E-01 | 0.01  | 9.65E-01 |
| MEDAG         | -0.11 | 5.63E-01 | -0.01 | 9.65E-01 |
| METTL21C      | 0.27  | 1.72E-01 | 0.01  | 9.65E-01 |
| NFKBIB        | 0.16  | 4.25E-01 | -0.01 | 9.65E-01 |
| NUDCD2        | 0.13  | 5.04E-01 | 0.01  | 9.65E-01 |
| PRICKLE2-AS1  | 0.19  | 3.34E-01 | 0.01  | 9.65E-01 |
| PSG10P        | 0.15  | 4.41E-01 | 0.01  | 9.65E-01 |
| RB1           | 0.12  | 5.47E-01 | 0.01  | 9.65E-01 |
| RN7SKP273     | -0.18 | 3.68E-01 | 0.01  | 9.65E-01 |

|                      |       |          |       |          |
|----------------------|-------|----------|-------|----------|
| <b>RN7SL258P</b>     | 0.11  | 5.87E-01 | 0.01  | 9.65E-01 |
| <b>RNU7-84P</b>      | -0.03 | 8.97E-01 | -0.01 | 9.65E-01 |
| <b>RP11-109P11.1</b> | 0.04  | 8.40E-01 | 0.01  | 9.65E-01 |
| <b>RP11-278C7.1</b>  | -0.20 | 2.97E-01 | 0.01  | 9.65E-01 |
| <b>RP11-319G9.5</b>  | -0.10 | 6.26E-01 | -0.01 | 9.65E-01 |
| <b>RP11-483L5.1</b>  | 0.10  | 6.14E-01 | 0.01  | 9.65E-01 |
| <b>RP11-686G8.5</b>  | -0.04 | 8.25E-01 | 0.01  | 9.65E-01 |
| <b>RP11-864J10.4</b> | -0.03 | 8.91E-01 | 0.01  | 9.65E-01 |
| <b>RP3-465N24.5</b>  | -0.03 | 8.86E-01 | -0.01 | 9.65E-01 |
| <b>RPL7AP6</b>       | -0.01 | 9.61E-01 | 0.01  | 9.65E-01 |
| <b>RPS6P16</b>       | 0.25  | 2.08E-01 | -0.01 | 9.65E-01 |
| <b>SMOC1</b>         | -0.16 | 4.12E-01 | 0.01  | 9.65E-01 |
| <b>SPACA6P-AS</b>    | -0.11 | 5.62E-01 | 0.01  | 9.65E-01 |
| <b>SPATA2</b>        | 0.12  | 5.37E-01 | -0.01 | 9.65E-01 |
| <b>TMEM74</b>        | 0.05  | 8.17E-01 | 0.01  | 9.65E-01 |
| <b>TTC1</b>          | 0.03  | 8.67E-01 | -0.01 | 9.65E-01 |
| <b>ZBTB11</b>        | 0.11  | 5.89E-01 | 0.01  | 9.65E-01 |
| <b>ZNF587</b>        | 0.37  | 5.58E-02 | 0.01  | 9.65E-01 |
| <b>AC006129.2</b>    | 0.09  | 6.47E-01 | -0.01 | 9.66E-01 |
| <b>AC139103.1</b>    | 0.09  | 6.56E-01 | 0.01  | 9.66E-01 |
| <b>AL450992.2</b>    | -0.25 | 2.03E-01 | 0.01  | 9.66E-01 |
| <b>API5P1</b>        | -0.12 | 5.43E-01 | -0.01 | 9.66E-01 |
| <b>C18orf54</b>      | -0.04 | 8.27E-01 | 0.01  | 9.66E-01 |
| <b>CCDC79</b>        | 0.08  | 6.86E-01 | 0.01  | 9.66E-01 |
| <b>CD22</b>          | 0.12  | 5.41E-01 | 0.01  | 9.66E-01 |
| <b>CDC26</b>         | 0.18  | 3.71E-01 | -0.01 | 9.66E-01 |
| <b>CDCA4P1</b>       | -0.11 | 5.84E-01 | 0.01  | 9.66E-01 |
| <b>COX6CP10</b>      | -0.28 | 1.48E-01 | 0.01  | 9.66E-01 |
| <b>CTD-2575K13.6</b> | -0.39 | 4.21E-02 | -0.01 | 9.66E-01 |
| <b>CTD-3236F5.1</b>  | -0.16 | 4.07E-01 | -0.01 | 9.66E-01 |
| <b>DAG1</b>          | 0.05  | 8.02E-01 | 0.01  | 9.66E-01 |
| <b>DCAF8</b>         | -0.14 | 4.67E-01 | -0.01 | 9.66E-01 |
| <b>DDHD1</b>         | 0.08  | 7.00E-01 | 0.01  | 9.66E-01 |
| <b>DKFZp434J0226</b> | 0.02  | 9.26E-01 | 0.01  | 9.66E-01 |
| <b>EI24</b>          | 0.08  | 6.74E-01 | -0.01 | 9.66E-01 |
| <b>EPHB6</b>         | 0.03  | 8.74E-01 | -0.01 | 9.66E-01 |
| <b>EPOR</b>          | -0.04 | 8.45E-01 | -0.01 | 9.66E-01 |
| <b>FGF14</b>         | -0.39 | 3.95E-02 | 0.01  | 9.66E-01 |
| <b>G303</b>          | 0.30  | 1.24E-01 | 0.01  | 9.66E-01 |
| <b>GJC3</b>          | 0.00  | 9.97E-01 | 0.01  | 9.66E-01 |
| <b>HIGD2A</b>        | -0.18 | 3.55E-01 | 0.01  | 9.66E-01 |
| <b>HIST2H2BC</b>     | 0.11  | 5.81E-01 | 0.01  | 9.66E-01 |
| <b>HN1</b>           | 0.14  | 4.86E-01 | 0.01  | 9.66E-01 |
| <b>MEIS3P1</b>       | -0.12 | 5.54E-01 | 0.01  | 9.66E-01 |
| <b>NME4</b>          | 0.21  | 2.95E-01 | -0.01 | 9.66E-01 |
| <b>NSUN5</b>         | 0.08  | 6.89E-01 | -0.01 | 9.66E-01 |
| <b>PDCD11</b>        | 0.08  | 6.76E-01 | 0.01  | 9.66E-01 |

|                |       |          |       |          |
|----------------|-------|----------|-------|----------|
| PPM1J          | -0.30 | 1.26E-01 | -0.01 | 9.66E-01 |
| PSMD8          | -0.05 | 8.00E-01 | -0.01 | 9.66E-01 |
| RP11-234K19.1  | -0.25 | 2.06E-01 | 0.01  | 9.66E-01 |
| RP11-342A23.2  | -0.11 | 5.80E-01 | 0.01  | 9.66E-01 |
| RP11-474N24.6  | -0.10 | 6.17E-01 | 0.01  | 9.66E-01 |
| RP11-613M10.6  | -0.05 | 8.15E-01 | -0.01 | 9.66E-01 |
| RP11-685M7.3   | -0.41 | 3.20E-02 | -0.01 | 9.66E-01 |
| RP11-778H2.1   | -0.32 | 9.45E-02 | 0.01  | 9.66E-01 |
| RP11-96K19.2   | 0.16  | 4.02E-01 | -0.01 | 9.66E-01 |
| RP4-751H13.7   | 0.02  | 9.31E-01 | -0.01 | 9.66E-01 |
| RP4-816N1.6    | -0.32 | 9.62E-02 | 0.01  | 9.66E-01 |
| RPAP1          | 0.21  | 2.78E-01 | 0.01  | 9.66E-01 |
| RXFP4          | -0.23 | 2.31E-01 | 0.01  | 9.66E-01 |
| SDHD           | 0.16  | 4.08E-01 | -0.01 | 9.66E-01 |
| SFXN3          | -0.36 | 5.88E-02 | 0.01  | 9.66E-01 |
| SMIM11A        | 0.05  | 7.94E-01 | -0.01 | 9.66E-01 |
| TAF11          | 0.10  | 6.29E-01 | -0.01 | 9.66E-01 |
| TBC1D3         | -0.05 | 8.01E-01 | -0.01 | 9.66E-01 |
| VEZF1          | -0.09 | 6.42E-01 | 0.01  | 9.66E-01 |
| AC068134.10    | -0.42 | 2.52E-02 | 0.01  | 9.67E-01 |
| ARHGAP30       | -0.22 | 2.51E-01 | -0.01 | 9.67E-01 |
| B4GALNT3       | 0.29  | 1.28E-01 | -0.01 | 9.67E-01 |
| C1orf35        | -0.04 | 8.41E-01 | 0.01  | 9.67E-01 |
| CLCN2          | 0.20  | 3.13E-01 | -0.01 | 9.67E-01 |
| CNBD2          | -0.14 | 4.93E-01 | 0.01  | 9.67E-01 |
| COL1A2         | -0.07 | 7.09E-01 | -0.01 | 9.67E-01 |
| CTD-2033C11.1  | -0.32 | 9.15E-02 | 0.01  | 9.67E-01 |
| CTD-2047H16.2  | 0.03  | 8.91E-01 | -0.01 | 9.67E-01 |
| EFEMP2         | -0.21 | 2.90E-01 | 0.01  | 9.67E-01 |
| GTF2H2C        | 0.03  | 8.74E-01 | -0.01 | 9.67E-01 |
| HILPDA         | 0.13  | 5.04E-01 | -0.01 | 9.67E-01 |
| JMJD7-PLA2G4B  | 0.00  | 9.93E-01 | -0.01 | 9.67E-01 |
| KCNN4          | -0.08 | 6.86E-01 | 0.01  | 9.67E-01 |
| KRTAP24-1      | -0.15 | 4.40E-01 | -0.01 | 9.67E-01 |
| MGAM           | -0.27 | 1.70E-01 | -0.01 | 9.67E-01 |
| MISP           | -0.23 | 2.34E-01 | -0.01 | 9.67E-01 |
| MYBL2          | -0.08 | 6.84E-01 | 0.01  | 9.67E-01 |
| NDUFS4         | 0.05  | 8.08E-01 | -0.01 | 9.67E-01 |
| OTUD7B         | -0.12 | 5.54E-01 | -0.01 | 9.67E-01 |
| PCDHB11        | 0.32  | 1.00E-01 | -0.01 | 9.67E-01 |
| PTOV1-AS1      | -0.06 | 7.63E-01 | 0.01  | 9.67E-01 |
| QRICH2         | 0.08  | 6.77E-01 | -0.01 | 9.67E-01 |
| RN7SL382P      | 0.36  | 6.24E-02 | 0.01  | 9.67E-01 |
| RNU6-895P      | -0.41 | 3.01E-02 | 0.01  | 9.67E-01 |
| RP11-1415C14.3 | -0.09 | 6.44E-01 | -0.01 | 9.67E-01 |
| RP11-214K3.5   | -0.14 | 4.65E-01 | -0.01 | 9.67E-01 |
| RP11-461A8.5   | -0.24 | 2.15E-01 | -0.01 | 9.67E-01 |

|               |       |          |       |          |
|---------------|-------|----------|-------|----------|
| RP11-554D20.2 | -0.21 | 2.80E-01 | 0.01  | 9.67E-01 |
| RP11-80H18.3  | -0.05 | 8.07E-01 | 0.01  | 9.67E-01 |
| RP11-983P16.2 | 0.19  | 3.22E-01 | -0.01 | 9.67E-01 |
| SLC35A2       | 0.20  | 3.16E-01 | -0.01 | 9.67E-01 |
| SPA17         | 0.18  | 3.57E-01 | 0.01  | 9.67E-01 |
| SSSCA1        | 0.19  | 3.24E-01 | 0.01  | 9.67E-01 |
| STXBP4        | -0.23 | 2.29E-01 | 0.01  | 9.67E-01 |
| TMEM120B      | -0.11 | 5.82E-01 | -0.01 | 9.67E-01 |
| UBE3D         | 0.22  | 2.53E-01 | -0.01 | 9.67E-01 |
| WDR70         | -0.11 | 5.89E-01 | 0.01  | 9.67E-01 |
| XLOC_005724   | 0.07  | 7.26E-01 | 0.01  | 9.67E-01 |
| YRDCP2        | -0.17 | 3.96E-01 | 0.01  | 9.67E-01 |
| ZFYVE16       | 0.04  | 8.55E-01 | -0.01 | 9.67E-01 |
| AC003958.2    | -0.21 | 2.93E-01 | -0.01 | 9.69E-01 |
| AC092933.3    | 0.25  | 1.94E-01 | -0.01 | 9.69E-01 |
| AC093323.3    | 0.07  | 7.36E-01 | -0.01 | 9.69E-01 |
| ACSL5         | -0.02 | 9.38E-01 | -0.01 | 9.69E-01 |
| BSCL2         | -0.33 | 8.18E-02 | -0.01 | 9.69E-01 |
| CHST10        | 0.18  | 3.71E-01 | -0.01 | 9.69E-01 |
| CTC-325J23.2  | -0.12 | 5.56E-01 | -0.01 | 9.69E-01 |
| EEF1A1P24     | 0.21  | 2.92E-01 | -0.01 | 9.69E-01 |
| G5796         | 0.32  | 9.47E-02 | -0.01 | 9.69E-01 |
| GS1-115G20.2  | -0.41 | 2.83E-02 | -0.01 | 9.69E-01 |
| LSM1          | 0.29  | 1.35E-01 | -0.01 | 9.69E-01 |
| NDUFA3        | 0.02  | 9.00E-01 | -0.01 | 9.69E-01 |
| RN7SL362P     | 0.06  | 7.59E-01 | -0.01 | 9.69E-01 |
| RN7SL441P     | 0.11  | 5.65E-01 | -0.01 | 9.69E-01 |
| RP11-326N17.2 | 0.11  | 5.88E-01 | -0.01 | 9.69E-01 |
| RP11-334C17.6 | 0.09  | 6.34E-01 | -0.01 | 9.69E-01 |
| RP11-374M1.2  | -0.19 | 3.24E-01 | -0.01 | 9.69E-01 |
| RP11-464F9.22 | -0.21 | 2.87E-01 | -0.01 | 9.69E-01 |
| RP11-489G11.3 | -0.30 | 1.20E-01 | -0.01 | 9.69E-01 |
| RP11-775C24.4 | 0.06  | 7.45E-01 | -0.01 | 9.69E-01 |
| TBC1D16       | -0.03 | 8.92E-01 | -0.01 | 9.69E-01 |
| ZNHIT1        | 0.13  | 5.13E-01 | -0.01 | 9.69E-01 |
| CUL1          | 0.14  | 4.86E-01 | 0.01  | 9.69E-01 |
| CYP51A1-AS1   | -0.08 | 6.85E-01 | 0.01  | 9.69E-01 |
| EFCAB10       | 0.02  | 9.27E-01 | 0.01  | 9.69E-01 |
| GAS6          | 0.00  | 9.82E-01 | 0.01  | 9.69E-01 |
| GPKOW         | -0.05 | 7.97E-01 | 0.01  | 9.69E-01 |
| KCNG2         | -0.30 | 1.16E-01 | 0.01  | 9.69E-01 |
| LAS1L         | 0.01  | 9.49E-01 | 0.01  | 9.69E-01 |
| LINGO1-AS1    | -0.21 | 2.78E-01 | 0.01  | 9.69E-01 |
| MIR4505       | -0.19 | 3.44E-01 | 0.01  | 9.69E-01 |
| PDCD5         | 0.04  | 8.48E-01 | 0.01  | 9.69E-01 |
| PRMT1         | 0.06  | 7.77E-01 | 0.01  | 9.69E-01 |
| RBM17         | -0.22 | 2.60E-01 | 0.01  | 9.69E-01 |

|               |       |          |       |          |
|---------------|-------|----------|-------|----------|
| RP11-160A9.2  | 0.17  | 3.84E-01 | 0.01  | 9.69E-01 |
| RP11-258C19.7 | -0.07 | 7.32E-01 | 0.01  | 9.69E-01 |
| RP11-282O18.3 | 0.05  | 8.07E-01 | 0.01  | 9.69E-01 |
| RP11-383G10.5 | -0.07 | 7.26E-01 | 0.01  | 9.69E-01 |
| RP11-996F15.2 | -0.13 | 5.02E-01 | 0.01  | 9.69E-01 |
| XLOC_011518   | 0.00  | 9.80E-01 | 0.01  | 9.69E-01 |
| CHCHD2        | 0.04  | 8.27E-01 | -0.01 | 9.70E-01 |
| CHCHD4        | 0.11  | 5.61E-01 | -0.01 | 9.70E-01 |
| CNEP1R1       | 0.16  | 4.21E-01 | -0.01 | 9.70E-01 |
| COMMD6        | -0.02 | 9.34E-01 | -0.01 | 9.70E-01 |
| CPS1          | 0.02  | 9.18E-01 | -0.01 | 9.70E-01 |
| CTD-2011F17.2 | -0.30 | 1.23E-01 | 0.01  | 9.70E-01 |
| CYS1          | -0.04 | 8.30E-01 | -0.01 | 9.70E-01 |
| CYTIP         | 0.11  | 5.88E-01 | 0.01  | 9.70E-01 |
| DENND3        | 0.06  | 7.52E-01 | -0.01 | 9.70E-01 |
| DENR          | 0.19  | 3.36E-01 | 0.01  | 9.70E-01 |
| DNASE1        | 0.01  | 9.71E-01 | -0.01 | 9.70E-01 |
| GLTSCR1-AS1   | -0.15 | 4.49E-01 | 0.01  | 9.70E-01 |
| GOLIM4        | 0.11  | 5.75E-01 | -0.01 | 9.70E-01 |
| HEBP1         | -0.26 | 1.85E-01 | -0.01 | 9.70E-01 |
| KB-1562D12.2  | -0.05 | 7.93E-01 | -0.01 | 9.70E-01 |
| LINC00921     | -0.07 | 7.16E-01 | 0.01  | 9.70E-01 |
| LOH12CR2      | -0.14 | 4.79E-01 | 0.01  | 9.70E-01 |
| MRPS33        | 0.01  | 9.43E-01 | -0.01 | 9.70E-01 |
| NFIC          | -0.02 | 9.35E-01 | -0.01 | 9.70E-01 |
| PRDX2P3       | -0.03 | 8.93E-01 | -0.01 | 9.70E-01 |
| RAN           | 0.05  | 7.93E-01 | -0.01 | 9.70E-01 |
| RP11-10N16.3  | -0.11 | 5.83E-01 | -0.01 | 9.70E-01 |
| RP11-141M1.1  | -0.10 | 6.01E-01 | 0.01  | 9.70E-01 |
| RP11-16E23.4  | -0.19 | 3.29E-01 | 0.01  | 9.70E-01 |
| RP11-264M12.2 | -0.13 | 5.21E-01 | 0.01  | 9.70E-01 |
| RP11-338K13.1 | -0.15 | 4.47E-01 | 0.01  | 9.70E-01 |
| RP11-344B2.2  | -0.14 | 4.87E-01 | 0.01  | 9.70E-01 |
| RP11-382D8.3  | 0.05  | 7.92E-01 | 0.01  | 9.70E-01 |
| RP11-462G22.2 | 0.22  | 2.56E-01 | -0.01 | 9.70E-01 |
| RP11-500G22.5 | -0.23 | 2.36E-01 | -0.01 | 9.70E-01 |
| RP11-568A7.1  | 0.18  | 3.53E-01 | 0.01  | 9.70E-01 |
| RP11-67L2.2   | 0.05  | 8.16E-01 | -0.01 | 9.70E-01 |
| RP11-83N9.6   | 0.06  | 7.43E-01 | 0.01  | 9.70E-01 |
| RP11-85G18.6  | 0.01  | 9.55E-01 | 0.01  | 9.70E-01 |
| RP11-862P13.1 | -0.21 | 2.83E-01 | -0.01 | 9.70E-01 |
| RPF2          | 0.17  | 3.89E-01 | -0.01 | 9.70E-01 |
| RPL7P32       | -0.36 | 6.30E-02 | 0.01  | 9.70E-01 |
| RPL9P3        | -0.12 | 5.35E-01 | -0.01 | 9.70E-01 |
| RPS20P31      | 0.33  | 8.29E-02 | -0.01 | 9.70E-01 |
| RWDD4P1       | 0.10  | 6.00E-01 | 0.01  | 9.70E-01 |
| SDPR          | -0.34 | 8.02E-02 | 0.01  | 9.70E-01 |

|                |       |          |       |          |
|----------------|-------|----------|-------|----------|
| SNORD126       | 0.20  | 3.11E-01 | -0.01 | 9.70E-01 |
| STC2           | 0.27  | 1.66E-01 | -0.01 | 9.70E-01 |
| STK38L         | 0.33  | 9.09E-02 | -0.01 | 9.70E-01 |
| TMX2P1         | 0.19  | 3.32E-01 | 0.01  | 9.70E-01 |
| YES1           | 0.17  | 3.77E-01 | 0.01  | 9.70E-01 |
| AC000068.5     | 0.24  | 2.26E-01 | 0.01  | 9.71E-01 |
| AGAP1          | -0.01 | 9.51E-01 | -0.01 | 9.71E-01 |
| C16orf13       | -0.02 | 9.28E-01 | -0.01 | 9.71E-01 |
| C1orf159       | 0.02  | 9.13E-01 | 0.01  | 9.71E-01 |
| CARM1P1        | 0.17  | 3.97E-01 | 0.01  | 9.71E-01 |
| COA4           | 0.23  | 2.44E-01 | -0.01 | 9.71E-01 |
| DNAJB11        | 0.03  | 8.70E-01 | 0.01  | 9.71E-01 |
| FJX1           | -0.01 | 9.45E-01 | 0.01  | 9.71E-01 |
| HCG11          | -0.07 | 7.26E-01 | -0.01 | 9.71E-01 |
| IER3           | -0.01 | 9.58E-01 | 0.01  | 9.71E-01 |
| LETMD1         | -0.13 | 5.06E-01 | -0.01 | 9.71E-01 |
| NFIA-AS2       | 0.00  | 9.91E-01 | 0.01  | 9.71E-01 |
| NOL12          | -0.02 | 9.21E-01 | -0.01 | 9.71E-01 |
| NR2C2AP        | -0.18 | 3.58E-01 | 0.01  | 9.71E-01 |
| PARS2          | 0.11  | 5.64E-01 | -0.01 | 9.71E-01 |
| PNRC2P1        | -0.11 | 5.79E-01 | -0.01 | 9.71E-01 |
| PRICKLE1       | 0.31  | 1.08E-01 | -0.01 | 9.71E-01 |
| PSMB7          | -0.08 | 6.87E-01 | -0.01 | 9.71E-01 |
| PSMD3          | 0.06  | 7.67E-01 | 0.01  | 9.71E-01 |
| RHOA-IT1       | 0.01  | 9.42E-01 | -0.01 | 9.71E-01 |
| RLF            | -0.13 | 5.19E-01 | 0.01  | 9.71E-01 |
| RN7SL832P      | -0.04 | 8.55E-01 | -0.01 | 9.71E-01 |
| RNA5SP393      | 0.04  | 8.33E-01 | -0.01 | 9.71E-01 |
| RNU6-998P      | -0.20 | 3.06E-01 | -0.01 | 9.71E-01 |
| RP11-322D14.2  | -0.08 | 6.78E-01 | -0.01 | 9.71E-01 |
| RP11-580I16.2  | -0.12 | 5.31E-01 | -0.01 | 9.71E-01 |
| RP11-84G21.1   | -0.23 | 2.32E-01 | -0.01 | 9.71E-01 |
| RP13-672B3.5   | 0.14  | 4.72E-01 | -0.01 | 9.71E-01 |
| RP3-325F22.3   | 0.28  | 1.53E-01 | 0.01  | 9.71E-01 |
| RP4-683L5.1    | -0.08 | 6.69E-01 | -0.01 | 9.71E-01 |
| RP5-867C24.1   | 0.06  | 7.44E-01 | -0.01 | 9.71E-01 |
| RPS3P7         | -0.17 | 3.83E-01 | -0.01 | 9.71E-01 |
| RTKL1-TNFRSF6B | -0.14 | 4.63E-01 | -0.01 | 9.71E-01 |
| SLC22A10       | 0.05  | 7.86E-01 | -0.01 | 9.71E-01 |
| SNORA70        | 0.11  | 5.64E-01 | 0.01  | 9.71E-01 |
| SOS1           | 0.04  | 8.38E-01 | 0.01  | 9.71E-01 |
| UBR1           | 0.17  | 3.93E-01 | -0.01 | 9.71E-01 |
| hsa-mir-3181   | -0.01 | 9.63E-01 | 0.01  | 9.71E-01 |
| AC097461.4     | 0.19  | 3.39E-01 | -0.01 | 9.72E-01 |
| DGCR14         | 0.06  | 7.80E-01 | -0.01 | 9.72E-01 |
| FAM124A        | -0.21 | 2.91E-01 | -0.01 | 9.72E-01 |
| FAM156B        | -0.24 | 2.23E-01 | -0.01 | 9.72E-01 |



|               |       |          |       |          |
|---------------|-------|----------|-------|----------|
| FAM175A       | 0.03  | 8.77E-01 | -0.01 | 9.72E-01 |
| KIF1A         | -0.19 | 3.36E-01 | -0.01 | 9.72E-01 |
| PHEX          | 0.09  | 6.39E-01 | -0.01 | 9.72E-01 |
| RNF212        | 0.01  | 9.49E-01 | -0.01 | 9.72E-01 |
| RP11-346J10.2 | -0.22 | 2.68E-01 | -0.01 | 9.72E-01 |
| RP11-562A8.1  | 0.16  | 4.27E-01 | -0.01 | 9.72E-01 |
| SH3GL1        | 0.08  | 6.95E-01 | -0.01 | 9.72E-01 |
| SLC26A1       | -0.07 | 7.40E-01 | -0.01 | 9.72E-01 |
| TSHZ2         | -0.30 | 1.23E-01 | -0.01 | 9.72E-01 |
| VDAC3         | 0.16  | 4.26E-01 | -0.01 | 9.72E-01 |
| ZNF852        | -0.34 | 7.89E-02 | -0.01 | 9.72E-01 |
| C17orf89      | -0.07 | 7.21E-01 | 0.01  | 9.72E-01 |
| CT62          | 0.31  | 1.14E-01 | 0.01  | 9.72E-01 |
| DENND4A       | 0.03  | 8.74E-01 | 0.01  | 9.72E-01 |
| FAM106A       | 0.10  | 6.21E-01 | 0.01  | 9.72E-01 |
| G30522        | -0.36 | 5.80E-02 | 0.01  | 9.72E-01 |
| GAPDHP52      | -0.24 | 2.16E-01 | 0.01  | 9.72E-01 |
| GCH1          | 0.19  | 3.24E-01 | 0.01  | 9.72E-01 |
| GLUL          | 0.38  | 4.85E-02 | 0.01  | 9.72E-01 |
| LINC01024     | -0.02 | 9.38E-01 | 0.01  | 9.72E-01 |
| MALAT1        | -0.17 | 3.89E-01 | 0.01  | 9.72E-01 |
| NANOS1        | 0.36  | 6.03E-02 | 0.01  | 9.72E-01 |
| OSBPL7        | -0.12 | 5.48E-01 | 0.01  | 9.72E-01 |
| RP1-137D17.2  | -0.18 | 3.71E-01 | 0.01  | 9.72E-01 |
| RP1-47M23.3   | -0.05 | 8.08E-01 | 0.01  | 9.72E-01 |
| RP11-211N11.5 | -0.19 | 3.32E-01 | 0.01  | 9.72E-01 |
| RP11-312P12.3 | -0.24 | 2.27E-01 | 0.01  | 9.72E-01 |
| RP11-35G9.5   | 0.40  | 3.51E-02 | 0.01  | 9.72E-01 |
| RP11-420K8.1  | -0.15 | 4.54E-01 | 0.01  | 9.72E-01 |
| RP11-452H21.2 | -0.13 | 5.26E-01 | 0.01  | 9.72E-01 |
| RP13-580F15.2 | 0.21  | 2.89E-01 | 0.01  | 9.72E-01 |
| RP3-514P16.1  | -0.11 | 5.70E-01 | 0.01  | 9.72E-01 |
| SNAPC2        | -0.03 | 8.88E-01 | 0.01  | 9.72E-01 |
| SRPX          | 0.02  | 9.24E-01 | 0.01  | 9.72E-01 |
| XLOC_012588   | -0.02 | 9.39E-01 | 0.01  | 9.72E-01 |
| ZBED3-AS1     | -0.18 | 3.63E-01 | 0.01  | 9.72E-01 |
| AC068669.1    | 0.15  | 4.39E-01 | -0.01 | 9.73E-01 |
| AC092755.4    | 0.12  | 5.41E-01 | -0.01 | 9.73E-01 |
| AL390776.1    | 0.13  | 5.20E-01 | 0.01  | 9.73E-01 |
| ANGPT1        | -0.10 | 6.12E-01 | 0.01  | 9.73E-01 |
| ANKRD18CP     | -0.36 | 6.18E-02 | 0.01  | 9.73E-01 |
| ARF6          | 0.01  | 9.57E-01 | -0.01 | 9.73E-01 |
| ATMIN         | 0.17  | 3.95E-01 | -0.01 | 9.73E-01 |
| CMTM7         | -0.25 | 1.94E-01 | -0.01 | 9.73E-01 |
| CTB-174D11.3  | 0.05  | 7.96E-01 | 0.01  | 9.73E-01 |
| CTB-193M12.1  | 0.16  | 4.24E-01 | -0.01 | 9.73E-01 |
| CXorf58       | 0.19  | 3.29E-01 | 0.01  | 9.73E-01 |

|               |       |          |       |          |
|---------------|-------|----------|-------|----------|
| EMD           | 0.01  | 9.72E-01 | 0.01  | 9.73E-01 |
| FTCDNL1       | 0.19  | 3.28E-01 | 0.01  | 9.73E-01 |
| KIF2A         | 0.32  | 9.50E-02 | -0.01 | 9.73E-01 |
| MDH1          | 0.11  | 5.62E-01 | -0.01 | 9.73E-01 |
| MRPL17        | 0.13  | 5.16E-01 | 0.01  | 9.73E-01 |
| RBFOX1        | 0.17  | 3.85E-01 | -0.01 | 9.73E-01 |
| RNU6-1177P    | -0.12 | 5.41E-01 | 0.01  | 9.73E-01 |
| RNU6-8        | 0.05  | 8.14E-01 | -0.01 | 9.73E-01 |
| RP1-142L7.9   | -0.40 | 3.43E-02 | 0.01  | 9.73E-01 |
| RP1-34B20.21  | -0.12 | 5.45E-01 | 0.01  | 9.73E-01 |
| RP1-37M3.8    | -0.02 | 9.12E-01 | -0.01 | 9.73E-01 |
| RP11-126H7.4  | -0.01 | 9.47E-01 | 0.01  | 9.73E-01 |
| RP11-299H21.1 | -0.12 | 5.45E-01 | 0.01  | 9.73E-01 |
| RP11-304F15.7 | 0.06  | 7.61E-01 | 0.01  | 9.73E-01 |
| RP11-398E10.1 | -0.18 | 3.50E-01 | -0.01 | 9.73E-01 |
| RP11-543H12.1 | -0.05 | 7.88E-01 | 0.01  | 9.73E-01 |
| RP11-616M17.1 | -0.25 | 1.99E-01 | -0.01 | 9.73E-01 |
| RP3-508I15.9  | -0.13 | 5.04E-01 | -0.01 | 9.73E-01 |
| RP5-827C21.4  | 0.10  | 6.17E-01 | -0.01 | 9.73E-01 |
| RPL31P49      | -0.05 | 8.02E-01 | -0.01 | 9.73E-01 |
| RPL5P14       | -0.11 | 5.63E-01 | 0.01  | 9.73E-01 |
| RRM2          | 0.02  | 9.33E-01 | -0.01 | 9.73E-01 |
| SART1         | -0.14 | 4.93E-01 | 0.01  | 9.73E-01 |
| SLIT2         | -0.30 | 1.16E-01 | -0.01 | 9.73E-01 |
| TRPM4         | 0.14  | 4.65E-01 | -0.01 | 9.73E-01 |
| ZNF211        | 0.13  | 5.01E-01 | 0.01  | 9.73E-01 |
| AC010240.2    | 0.02  | 9.23E-01 | 0.01  | 9.75E-01 |
| AC107218.3    | -0.02 | 9.12E-01 | -0.01 | 9.75E-01 |
| AL109761.5    | -0.22 | 2.70E-01 | -0.01 | 9.75E-01 |
| AL357515.1    | -0.06 | 7.78E-01 | -0.01 | 9.75E-01 |
| ANKRD19P      | -0.13 | 4.94E-01 | 0.01  | 9.75E-01 |
| ATP8B4        | -0.13 | 5.16E-01 | 0.01  | 9.75E-01 |
| AXIN2         | -0.31 | 1.11E-01 | 0.01  | 9.75E-01 |
| CISD2         | 0.06  | 7.54E-01 | -0.01 | 9.75E-01 |
| CLU1          | 0.46  | 1.34E-02 | -0.01 | 9.75E-01 |
| CT83          | 0.14  | 4.63E-01 | 0.01  | 9.75E-01 |
| CTB-178M22.1  | -0.10 | 6.01E-01 | -0.01 | 9.75E-01 |
| CTD-2515H24.3 | -0.04 | 8.32E-01 | -0.01 | 9.75E-01 |
| CX3CL1        | 0.04  | 8.29E-01 | 0.01  | 9.75E-01 |
| FBXO28        | 0.13  | 5.17E-01 | 0.01  | 9.75E-01 |
| G11315        | 0.05  | 8.05E-01 | 0.01  | 9.75E-01 |
| GALM          | 0.01  | 9.64E-01 | 0.01  | 9.75E-01 |
| GPR150        | -0.01 | 9.46E-01 | -0.01 | 9.75E-01 |
| HNRNPA1P45    | -0.04 | 8.46E-01 | 0.01  | 9.75E-01 |
| HSPB7         | -0.24 | 2.13E-01 | 0.01  | 9.75E-01 |
| ITFG1         | 0.13  | 5.18E-01 | -0.01 | 9.75E-01 |
| LSMEM1        | -0.17 | 3.77E-01 | -0.01 | 9.75E-01 |

|                |       |          |       |          |
|----------------|-------|----------|-------|----------|
| MBP            | 0.12  | 5.46E-01 | -0.01 | 9.75E-01 |
| MFAP2          | -0.04 | 8.41E-01 | 0.01  | 9.75E-01 |
| MIR5587        | -0.13 | 4.96E-01 | 0.01  | 9.75E-01 |
| MSH3           | -0.24 | 2.20E-01 | -0.01 | 9.75E-01 |
| MYO1H          | 0.25  | 2.06E-01 | 0.01  | 9.75E-01 |
| MYOT           | 0.41  | 2.91E-02 | -0.01 | 9.75E-01 |
| PRR13P1        | -0.20 | 3.15E-01 | 0.01  | 9.75E-01 |
| RASSF7         | -0.26 | 1.75E-01 | 0.01  | 9.75E-01 |
| RN7SL418P      | -0.08 | 6.79E-01 | 0.01  | 9.75E-01 |
| RNU6-32P       | -0.09 | 6.39E-01 | -0.01 | 9.75E-01 |
| RP11-174G17.3  | -0.20 | 3.19E-01 | -0.01 | 9.75E-01 |
| RP11-256L6.3   | 0.04  | 8.31E-01 | 0.01  | 9.75E-01 |
| RP11-365D23.4  | -0.28 | 1.51E-01 | -0.01 | 9.75E-01 |
| RP11-386G11.10 | -0.32 | 9.18E-02 | -0.01 | 9.75E-01 |
| RP13-93L13.2   | -0.16 | 4.09E-01 | -0.01 | 9.75E-01 |
| RP5-916O11.3   | -0.30 | 1.25E-01 | 0.01  | 9.75E-01 |
| RPL7AP64       | 0.34  | 7.54E-02 | 0.01  | 9.75E-01 |
| SAE1           | 0.02  | 9.27E-01 | 0.01  | 9.75E-01 |
| TEX14          | -0.01 | 9.57E-01 | 0.01  | 9.75E-01 |
| TMEM138        | 0.20  | 3.02E-01 | 0.01  | 9.75E-01 |
| TMEM14B        | 0.00  | 9.86E-01 | -0.01 | 9.75E-01 |
| XLOC_005592    | 0.38  | 4.66E-02 | -0.01 | 9.75E-01 |
| ZNF121         | 0.37  | 5.08E-02 | -0.01 | 9.75E-01 |
| ZNF77          | 0.09  | 6.57E-01 | -0.01 | 9.75E-01 |
| AC009133.12    | 0.25  | 2.09E-01 | -0.01 | 9.76E-01 |
| C2orf76        | -0.24 | 2.15E-01 | -0.01 | 9.76E-01 |
| G1562          | -0.16 | 4.07E-01 | -0.01 | 9.76E-01 |
| G40766         | 0.18  | 3.68E-01 | -0.01 | 9.76E-01 |
| GAR1           | 0.09  | 6.49E-01 | -0.01 | 9.76E-01 |
| HIST1H3E       | 0.02  | 9.03E-01 | -0.01 | 9.76E-01 |
| KIAA0196       | -0.10 | 6.17E-01 | -0.01 | 9.76E-01 |
| LINC01615      | 0.04  | 8.57E-01 | -0.01 | 9.76E-01 |
| MAP7D1         | 0.00  | 9.98E-01 | -0.01 | 9.76E-01 |
| RP11-358B23.5  | -0.20 | 3.09E-01 | -0.01 | 9.76E-01 |
| RP11-420K14.6  | -0.19 | 3.34E-01 | -0.01 | 9.76E-01 |
| SEPHS1         | 0.23  | 2.48E-01 | -0.01 | 9.76E-01 |
| TBC1D8B        | -0.21 | 2.81E-01 | -0.01 | 9.76E-01 |
| TRMT5          | 0.17  | 3.96E-01 | -0.01 | 9.76E-01 |
| WSCD1          | -0.14 | 4.67E-01 | -0.01 | 9.76E-01 |
| XLOC_009863    | -0.15 | 4.41E-01 | -0.01 | 9.76E-01 |
| YBX1P1         | 0.18  | 3.50E-01 | -0.01 | 9.76E-01 |
| BMS1P10        | -0.20 | 2.97E-01 | 0.01  | 9.76E-01 |
| CTC-378H22.2   | -0.18 | 3.62E-01 | 0.01  | 9.76E-01 |
| CYP4F24P       | -0.06 | 7.77E-01 | 0.01  | 9.76E-01 |
| ENPP7P12       | 0.05  | 7.96E-01 | 0.01  | 9.76E-01 |
| G22807         | 0.07  | 7.29E-01 | 0.01  | 9.76E-01 |
| GABRQ          | -0.25 | 1.99E-01 | 0.01  | 9.76E-01 |

|               |       |          |       |          |
|---------------|-------|----------|-------|----------|
| INPP5J        | -0.22 | 2.58E-01 | 0.01  | 9.76E-01 |
| KLK8          | -0.02 | 9.24E-01 | 0.01  | 9.76E-01 |
| LINC00672     | -0.32 | 9.65E-02 | 0.01  | 9.76E-01 |
| MARK2P8       | 0.07  | 7.31E-01 | 0.01  | 9.76E-01 |
| MF12          | -0.42 | 2.60E-02 | 0.01  | 9.76E-01 |
| NHSL1         | 0.09  | 6.47E-01 | 0.01  | 9.76E-01 |
| PRR26         | -0.28 | 1.53E-01 | 0.01  | 9.76E-01 |
| RP11-244H3.1  | -0.07 | 7.40E-01 | 0.01  | 9.76E-01 |
| RP11-689K5.3  | -0.23 | 2.37E-01 | 0.01  | 9.76E-01 |
| RP3-395M20.7  | -0.20 | 3.07E-01 | 0.01  | 9.76E-01 |
| RPL12P10      | 0.08  | 6.83E-01 | 0.01  | 9.76E-01 |
| SCAND2P       | 0.03  | 8.94E-01 | 0.01  | 9.76E-01 |
| THAP6         | 0.15  | 4.46E-01 | 0.01  | 9.76E-01 |
| A2M-AS1       | 0.21  | 2.94E-01 | -0.01 | 9.77E-01 |
| ABHD11-AS1    | -0.40 | 3.45E-02 | 0.01  | 9.77E-01 |
| AC012613.2    | -0.05 | 7.88E-01 | -0.01 | 9.77E-01 |
| C7orf57       | 0.36  | 5.86E-02 | -0.01 | 9.77E-01 |
| CNOT11        | 0.27  | 1.71E-01 | -0.01 | 9.77E-01 |
| CTA-414D7.1   | -0.26 | 1.78E-01 | 0.01  | 9.77E-01 |
| CTB-167B5.1   | -0.09 | 6.65E-01 | 0.01  | 9.77E-01 |
| CTC-527H23.1  | 0.12  | 5.29E-01 | -0.01 | 9.77E-01 |
| CTD-2135D7.5  | 0.13  | 4.98E-01 | 0.01  | 9.77E-01 |
| DCHS2         | -0.32 | 9.50E-02 | 0.01  | 9.77E-01 |
| DDX3P1        | -0.21 | 2.78E-01 | 0.01  | 9.77E-01 |
| FKBP5         | -0.07 | 7.09E-01 | 0.01  | 9.77E-01 |
| G22345        | 0.08  | 7.03E-01 | -0.01 | 9.77E-01 |
| G27536        | -0.04 | 8.41E-01 | 0.01  | 9.77E-01 |
| HS1BP3-IT1    | -0.15 | 4.34E-01 | 0.01  | 9.77E-01 |
| IRGM          | -0.16 | 4.15E-01 | -0.01 | 9.77E-01 |
| LINC01266     | -0.11 | 5.94E-01 | -0.01 | 9.77E-01 |
| MRPL42        | 0.28  | 1.52E-01 | -0.01 | 9.77E-01 |
| MUC5B         | -0.05 | 7.94E-01 | -0.01 | 9.77E-01 |
| POU5F2        | -0.02 | 9.05E-01 | -0.01 | 9.77E-01 |
| PROSC         | 0.08  | 7.02E-01 | 0.01  | 9.77E-01 |
| PRSS12        | 0.53  | 3.55E-03 | -0.01 | 9.77E-01 |
| PSMB1         | 0.04  | 8.42E-01 | 0.01  | 9.77E-01 |
| RNF25         | 0.19  | 3.44E-01 | 0.01  | 9.77E-01 |
| RP11-123K19.1 | 0.19  | 3.24E-01 | 0.01  | 9.77E-01 |
| RP11-173M1.5  | 0.12  | 5.57E-01 | 0.01  | 9.77E-01 |
| RP11-53B2.6   | -0.22 | 2.71E-01 | 0.01  | 9.77E-01 |
| RP11-923I11.6 | 0.10  | 6.30E-01 | -0.01 | 9.77E-01 |
| RP11-973H7.1  | -0.08 | 7.01E-01 | 0.01  | 9.77E-01 |
| RP11-989E6.13 | 0.02  | 9.29E-01 | -0.01 | 9.77E-01 |
| RP3-394A18.1  | -0.24 | 2.23E-01 | 0.01  | 9.77E-01 |
| RP4-644L1.2   | -0.31 | 1.09E-01 | 0.01  | 9.77E-01 |
| RP4-756G23.5  | -0.06 | 7.66E-01 | -0.01 | 9.77E-01 |
| RP5-827E24.1  | 0.15  | 4.57E-01 | -0.01 | 9.77E-01 |

|               |       |          |       |          |
|---------------|-------|----------|-------|----------|
| RP6-91H8.5    | -0.15 | 4.46E-01 | -0.01 | 9.77E-01 |
| RPSAP36       | 0.25  | 2.00E-01 | 0.01  | 9.77E-01 |
| RWDD3         | 0.04  | 8.52E-01 | -0.01 | 9.77E-01 |
| SEC61G        | 0.08  | 7.00E-01 | 0.01  | 9.77E-01 |
| SHOC2         | 0.02  | 9.14E-01 | -0.01 | 9.77E-01 |
| SNORA67       | -0.28 | 1.50E-01 | -0.01 | 9.77E-01 |
| SRPR          | 0.13  | 5.26E-01 | -0.01 | 9.77E-01 |
| SUPT3H        | -0.25 | 1.91E-01 | -0.01 | 9.77E-01 |
| TAS2R67P      | 0.23  | 2.50E-01 | 0.01  | 9.77E-01 |
| TOX4P1        | 0.02  | 9.28E-01 | 0.01  | 9.77E-01 |
| WAC           | -0.09 | 6.34E-01 | 0.01  | 9.77E-01 |
| ZWINT         | 0.12  | 5.42E-01 | 0.01  | 9.77E-01 |
| ATP5HP4       | -0.18 | 3.49E-01 | -0.01 | 9.78E-01 |
| CEP170P1      | -0.31 | 1.06E-01 | -0.01 | 9.78E-01 |
| GLIS2-AS1     | -0.08 | 6.97E-01 | -0.01 | 9.78E-01 |
| HAR1A         | -0.21 | 2.72E-01 | -0.01 | 9.78E-01 |
| LA16c-352F7.1 | -0.16 | 4.03E-01 | -0.01 | 9.78E-01 |
| METTL21AP1    | -0.28 | 1.51E-01 | -0.01 | 9.78E-01 |
| RN7SL306P     | -0.22 | 2.70E-01 | -0.01 | 9.78E-01 |
| RNU7-38P      | -0.08 | 7.04E-01 | -0.01 | 9.78E-01 |
| RP11-385D13.1 | -0.07 | 7.36E-01 | -0.01 | 9.78E-01 |
| RP11-58K22.4  | 0.19  | 3.43E-01 | -0.01 | 9.78E-01 |
| RP11-73K9.3   | -0.02 | 9.24E-01 | -0.01 | 9.78E-01 |
| TOR1A         | 0.11  | 5.69E-01 | -0.01 | 9.78E-01 |
| TRGC1         | -0.01 | 9.64E-01 | -0.01 | 9.78E-01 |
| UBE2D3P1      | 0.05  | 8.15E-01 | -0.01 | 9.78E-01 |
| XRCC2         | 0.15  | 4.35E-01 | -0.01 | 9.78E-01 |
| ACTR6         | 0.02  | 9.38E-01 | 0.01  | 9.78E-01 |
| ADARB1        | -0.10 | 6.02E-01 | 0.01  | 9.78E-01 |
| C1orf116      | 0.18  | 3.55E-01 | 0.01  | 9.78E-01 |
| CAPRIN2       | -0.15 | 4.55E-01 | 0.01  | 9.78E-01 |
| CARD17        | 0.26  | 1.73E-01 | 0.01  | 9.78E-01 |
| CHCHD1        | -0.01 | 9.61E-01 | 0.01  | 9.78E-01 |
| CISD1         | -0.05 | 8.02E-01 | 0.01  | 9.78E-01 |
| CLCN6         | -0.14 | 4.86E-01 | 0.01  | 9.78E-01 |
| DCAF15        | -0.02 | 9.15E-01 | 0.01  | 9.78E-01 |
| FAM207A       | 0.05  | 8.03E-01 | 0.01  | 9.78E-01 |
| FOXRED1       | -0.02 | 9.02E-01 | 0.01  | 9.78E-01 |
| GTF2F2P1      | -0.01 | 9.66E-01 | 0.01  | 9.78E-01 |
| HAUS7         | 0.04  | 8.53E-01 | 0.01  | 9.78E-01 |
| HNRNPA1P53    | 0.24  | 2.22E-01 | 0.01  | 9.78E-01 |
| IFRD1         | 0.22  | 2.65E-01 | 0.01  | 9.78E-01 |
| ITPR2         | -0.37 | 5.20E-02 | 0.01  | 9.78E-01 |
| MRPS22        | 0.05  | 8.00E-01 | 0.01  | 9.78E-01 |
| MTATP6P11     | -0.12 | 5.31E-01 | 0.01  | 9.78E-01 |
| MTCH2         | 0.02  | 9.22E-01 | 0.01  | 9.78E-01 |
| PNPLA7        | -0.29 | 1.34E-01 | 0.01  | 9.78E-01 |

|                |       |          |       |          |
|----------------|-------|----------|-------|----------|
| RP1-131F15.2   | -0.16 | 4.22E-01 | 0.01  | 9.78E-01 |
| RP11-15M15.1   | -0.17 | 3.85E-01 | 0.01  | 9.78E-01 |
| RP11-505K9.3   | 0.37  | 5.23E-02 | 0.01  | 9.78E-01 |
| RP11-66H6.4    | 0.07  | 7.41E-01 | 0.01  | 9.78E-01 |
| RP11-950C14.10 | 0.05  | 7.98E-01 | 0.01  | 9.78E-01 |
| RRP9           | 0.20  | 3.02E-01 | 0.01  | 9.78E-01 |
| SMTNL1         | 0.08  | 6.78E-01 | 0.01  | 9.78E-01 |
| ZNF789         | -0.09 | 6.51E-01 | 0.01  | 9.78E-01 |
| AC019181.2     | 0.11  | 5.81E-01 | -0.01 | 9.79E-01 |
| AC093732.1     | -0.34 | 7.61E-02 | -0.01 | 9.79E-01 |
| ADRA2B         | -0.12 | 5.33E-01 | -0.01 | 9.79E-01 |
| AGAP7P         | -0.11 | 5.61E-01 | -0.01 | 9.79E-01 |
| BCAS2          | 0.12  | 5.39E-01 | -0.01 | 9.79E-01 |
| C4orf27        | -0.14 | 4.75E-01 | 0.01  | 9.79E-01 |
| CCDC90B        | 0.04  | 8.50E-01 | -0.01 | 9.79E-01 |
| CTC1           | -0.19 | 3.20E-01 | -0.01 | 9.79E-01 |
| CTD-2555O16.4  | -0.13 | 5.19E-01 | -0.01 | 9.79E-01 |
| CTIF           | -0.07 | 7.15E-01 | 0.01  | 9.79E-01 |
| DUBR           | -0.14 | 4.89E-01 | 0.01  | 9.79E-01 |
| G25699         | 0.07  | 7.14E-01 | -0.01 | 9.79E-01 |
| G35852         | 0.22  | 2.69E-01 | 0.01  | 9.79E-01 |
| HOXC5          | 0.30  | 1.23E-01 | -0.01 | 9.79E-01 |
| PPP3R1         | 0.08  | 7.00E-01 | -0.01 | 9.79E-01 |
| PRKCI          | 0.17  | 3.97E-01 | 0.01  | 9.79E-01 |
| PSMA4          | 0.09  | 6.44E-01 | 0.01  | 9.79E-01 |
| PURG           | -0.12 | 5.31E-01 | -0.01 | 9.79E-01 |
| RNA5SP129      | -0.07 | 7.10E-01 | 0.01  | 9.79E-01 |
| RNA5SP491      | 0.14  | 4.73E-01 | 0.01  | 9.79E-01 |
| RP1-315G1.3    | 0.13  | 5.02E-01 | 0.01  | 9.79E-01 |
| RP11-1000B6.5  | 0.09  | 6.48E-01 | -0.01 | 9.79E-01 |
| RP11-135A24.2  | 0.19  | 3.38E-01 | -0.01 | 9.79E-01 |
| RP11-158H5.2   | 0.21  | 2.87E-01 | 0.01  | 9.79E-01 |
| RP11-565F19.2  | 0.09  | 6.50E-01 | 0.01  | 9.79E-01 |
| RP11-599B13.9  | 0.17  | 4.00E-01 | -0.01 | 9.79E-01 |
| RP11-640M9.2   | -0.02 | 9.35E-01 | -0.01 | 9.79E-01 |
| RP11-65J3.14   | 0.06  | 7.46E-01 | 0.01  | 9.79E-01 |
| RP11-863P13.4  | 0.09  | 6.52E-01 | -0.01 | 9.79E-01 |
| RPL3P7         | -0.16 | 4.24E-01 | 0.01  | 9.79E-01 |
| RPS20P14       | -0.38 | 4.54E-02 | -0.01 | 9.79E-01 |
| RPS23P8        | 0.15  | 4.55E-01 | -0.01 | 9.79E-01 |
| TONSL          | -0.05 | 8.11E-01 | 0.01  | 9.79E-01 |
| TRMT10B        | 0.04  | 8.45E-01 | 0.01  | 9.79E-01 |
| TXN            | -0.06 | 7.45E-01 | 0.01  | 9.79E-01 |
| ZKSCAN7P1      | 0.01  | 9.57E-01 | -0.01 | 9.79E-01 |
| ZNF233         | 0.18  | 3.72E-01 | -0.01 | 9.79E-01 |
| ZNF268         | 0.12  | 5.30E-01 | -0.01 | 9.79E-01 |
| ZNF271P        | -0.01 | 9.49E-01 | -0.01 | 9.79E-01 |

|                |       |          |      |          |
|----------------|-------|----------|------|----------|
| ZNF391         | 0.27  | 1.62E-01 | 0.01 | 9.79E-01 |
| AC092162.1     | 0.02  | 9.21E-01 | 0.00 | 9.81E-01 |
| AJ006998.2     | -0.32 | 9.30E-02 | 0.00 | 9.81E-01 |
| AL022345.7     | 0.23  | 2.36E-01 | 0.00 | 9.81E-01 |
| AL139080.1     | -0.18 | 3.51E-01 | 0.00 | 9.81E-01 |
| AP000487.6     | -0.29 | 1.36E-01 | 0.00 | 9.81E-01 |
| ARMC10P1       | 0.17  | 3.73E-01 | 0.00 | 9.81E-01 |
| BAIAP2-AS1     | 0.02  | 9.20E-01 | 0.00 | 9.81E-01 |
| CCT7           | 0.10  | 6.30E-01 | 0.00 | 9.81E-01 |
| CLDN15         | -0.02 | 9.13E-01 | 0.00 | 9.81E-01 |
| CNTN6          | -0.02 | 9.37E-01 | 0.00 | 9.81E-01 |
| CTC-453G23.4   | -0.30 | 1.25E-01 | 0.00 | 9.81E-01 |
| FBLN5          | -0.08 | 6.97E-01 | 0.00 | 9.81E-01 |
| FGF1           | -0.09 | 6.40E-01 | 0.00 | 9.81E-01 |
| G22216         | 0.04  | 8.52E-01 | 0.00 | 9.81E-01 |
| GABRB2         | 0.32  | 9.30E-02 | 0.00 | 9.81E-01 |
| GFER           | -0.09 | 6.35E-01 | 0.00 | 9.81E-01 |
| GSTP1P1        | -0.04 | 8.21E-01 | 0.00 | 9.81E-01 |
| HMGB1P23       | -0.26 | 1.74E-01 | 0.00 | 9.81E-01 |
| HMGN1P38       | 0.20  | 2.97E-01 | 0.00 | 9.81E-01 |
| HSBP1          | -0.02 | 9.38E-01 | 0.00 | 9.81E-01 |
| IFNG           | 0.10  | 6.13E-01 | 0.00 | 9.81E-01 |
| IGSF1          | 0.03  | 8.80E-01 | 0.00 | 9.81E-01 |
| KANSL1         | -0.11 | 5.62E-01 | 0.00 | 9.81E-01 |
| KRT18P7        | 0.28  | 1.54E-01 | 0.00 | 9.81E-01 |
| NDUFB4         | 0.16  | 4.28E-01 | 0.00 | 9.81E-01 |
| NR1I2          | -0.21 | 2.88E-01 | 0.00 | 9.81E-01 |
| PLBD2          | -0.03 | 8.63E-01 | 0.00 | 9.81E-01 |
| RNF4           | 0.17  | 4.00E-01 | 0.00 | 9.81E-01 |
| RP11-216L13.21 | 0.10  | 6.05E-01 | 0.00 | 9.81E-01 |
| RP11-255G12.2  | -0.03 | 8.94E-01 | 0.00 | 9.81E-01 |
| RP11-26P13.2   | 0.20  | 3.18E-01 | 0.00 | 9.81E-01 |
| RP11-296O14.3  | -0.12 | 5.46E-01 | 0.00 | 9.81E-01 |
| RP11-338K17.5  | 0.06  | 7.53E-01 | 0.00 | 9.81E-01 |
| RP11-350G8.5   | 0.17  | 3.80E-01 | 0.00 | 9.81E-01 |
| RP11-403I13.9  | 0.07  | 7.19E-01 | 0.00 | 9.81E-01 |
| RP11-84C10.4   | 0.09  | 6.43E-01 | 0.00 | 9.81E-01 |
| RPS18P12       | 0.24  | 2.14E-01 | 0.00 | 9.81E-01 |
| RPS26P21       | -0.03 | 8.98E-01 | 0.00 | 9.81E-01 |
| SCTR           | 0.02  | 9.23E-01 | 0.00 | 9.81E-01 |
| SNRNP40        | 0.09  | 6.38E-01 | 0.00 | 9.81E-01 |
| TMEM144        | 0.33  | 9.07E-02 | 0.00 | 9.81E-01 |
| TRIM46         | -0.23 | 2.47E-01 | 0.00 | 9.81E-01 |
| USH1G          | -0.01 | 9.55E-01 | 0.00 | 9.81E-01 |
| VDR            | 0.18  | 3.60E-01 | 0.00 | 9.81E-01 |
| XLOC_011614    | -0.04 | 8.33E-01 | 0.00 | 9.81E-01 |
| XLOC_014369    | 0.19  | 3.34E-01 | 0.00 | 9.81E-01 |

|               |       |          |      |          |
|---------------|-------|----------|------|----------|
| YEATS2-AS1    | -0.01 | 9.45E-01 | 0.00 | 9.81E-01 |
| YIPF5         | -0.18 | 3.69E-01 | 0.00 | 9.81E-01 |
| ZNF394        | 0.11  | 5.83E-01 | 0.00 | 9.81E-01 |
| AC006378.2    | 0.10  | 5.99E-01 | 0.00 | 9.82E-01 |
| AC074286.1    | -0.13 | 5.11E-01 | 0.00 | 9.82E-01 |
| AC104532.4    | -0.05 | 7.97E-01 | 0.00 | 9.82E-01 |
| CERKL         | -0.04 | 8.22E-01 | 0.00 | 9.82E-01 |
| CTD-2651B20.7 | 0.26  | 1.82E-01 | 0.00 | 9.82E-01 |
| ECM2          | -0.16 | 4.04E-01 | 0.00 | 9.82E-01 |
| EFHC1         | -0.26 | 1.74E-01 | 0.00 | 9.82E-01 |
| FDPSP7        | 0.10  | 5.96E-01 | 0.00 | 9.82E-01 |
| G10908        | -0.28 | 1.43E-01 | 0.00 | 9.82E-01 |
| HLA-DQA2      | 0.35  | 7.20E-02 | 0.00 | 9.82E-01 |
| HSPD1P9       | -0.28 | 1.44E-01 | 0.00 | 9.82E-01 |
| IL17C         | 0.30  | 1.21E-01 | 0.00 | 9.82E-01 |
| KRT86         | -0.15 | 4.44E-01 | 0.00 | 9.82E-01 |
| LSINCT5       | -0.27 | 1.59E-01 | 0.00 | 9.82E-01 |
| MIR3118-2     | -0.09 | 6.55E-01 | 0.00 | 9.82E-01 |
| MIR3611       | 0.01  | 9.65E-01 | 0.00 | 9.82E-01 |
| MMP11         | 0.10  | 6.26E-01 | 0.00 | 9.82E-01 |
| MPC2          | 0.14  | 4.84E-01 | 0.00 | 9.82E-01 |
| NUP62CL       | -0.17 | 3.86E-01 | 0.00 | 9.82E-01 |
| P4HA2         | -0.16 | 4.16E-01 | 0.00 | 9.82E-01 |
| RN7SL430P     | 0.00  | 9.93E-01 | 0.00 | 9.82E-01 |
| RP11-10J21.3  | -0.26 | 1.88E-01 | 0.00 | 9.82E-01 |
| RP11-10J21.5  | -0.08 | 6.82E-01 | 0.00 | 9.82E-01 |
| RP11-259P15.4 | -0.31 | 1.05E-01 | 0.00 | 9.82E-01 |
| RP11-361M10.3 | -0.09 | 6.61E-01 | 0.00 | 9.82E-01 |
| RP11-550F7.1  | 0.13  | 5.06E-01 | 0.00 | 9.82E-01 |
| RP4-717I23.3  | -0.06 | 7.79E-01 | 0.00 | 9.82E-01 |
| RP5-1125A11.6 | -0.29 | 1.31E-01 | 0.00 | 9.82E-01 |
| RP5-890E16.2  | -0.19 | 3.27E-01 | 0.00 | 9.82E-01 |
| RPL21P1       | -0.03 | 8.68E-01 | 0.00 | 9.82E-01 |
| SCAMP5        | 0.16  | 4.11E-01 | 0.00 | 9.82E-01 |
| TAF9          | 0.06  | 7.43E-01 | 0.00 | 9.82E-01 |
| TRBV29OR9-2   | -0.05 | 8.19E-01 | 0.00 | 9.82E-01 |
| UBE2K         | 0.04  | 8.45E-01 | 0.00 | 9.82E-01 |
| UBE2N         | 0.28  | 1.48E-01 | 0.00 | 9.82E-01 |
| XLOC_012700   | -0.16 | 4.27E-01 | 0.00 | 9.82E-01 |
| ZNF736P6Y     | 0.03  | 8.66E-01 | 0.00 | 9.82E-01 |
| AIG1          | 0.16  | 4.03E-01 | 0.00 | 9.83E-01 |
| ANGPT4        | 0.08  | 6.70E-01 | 0.00 | 9.83E-01 |
| ASTN2-AS1     | 0.02  | 9.35E-01 | 0.00 | 9.83E-01 |
| BNIP3P24      | -0.24 | 2.14E-01 | 0.00 | 9.83E-01 |
| CREB3L1       | -0.25 | 2.05E-01 | 0.00 | 9.83E-01 |
| CTD-2006O16.2 | -0.16 | 4.16E-01 | 0.00 | 9.83E-01 |
| DCAF12        | 0.31  | 1.10E-01 | 0.00 | 9.83E-01 |



|               |       |          |      |          |
|---------------|-------|----------|------|----------|
| FLNB          | 0.03  | 8.71E-01 | 0.00 | 9.83E-01 |
| G8154         | -0.26 | 1.84E-01 | 0.00 | 9.83E-01 |
| GARNL3        | -0.57 | 1.53E-03 | 0.00 | 9.83E-01 |
| HIGD1C        | -0.08 | 6.87E-01 | 0.00 | 9.83E-01 |
| HIST1H3G      | 0.06  | 7.46E-01 | 0.00 | 9.83E-01 |
| KIF7          | 0.09  | 6.33E-01 | 0.00 | 9.83E-01 |
| MPV17L        | 0.01  | 9.49E-01 | 0.00 | 9.83E-01 |
| MRPS26        | 0.08  | 6.79E-01 | 0.00 | 9.83E-01 |
| MYCBP         | 0.12  | 5.58E-01 | 0.00 | 9.83E-01 |
| NUP160        | -0.07 | 7.15E-01 | 0.00 | 9.83E-01 |
| PRH1          | 0.14  | 4.72E-01 | 0.00 | 9.83E-01 |
| RAP2C-AS1     | -0.27 | 1.71E-01 | 0.00 | 9.83E-01 |
| RNU6-834P     | -0.10 | 5.98E-01 | 0.00 | 9.83E-01 |
| RP1-167G20.1  | 0.13  | 5.05E-01 | 0.00 | 9.83E-01 |
| RP11-349F21.5 | 0.03  | 8.89E-01 | 0.00 | 9.83E-01 |
| RP11-362J17.1 | -0.06 | 7.57E-01 | 0.00 | 9.83E-01 |
| RP11-426L16.3 | 0.04  | 8.56E-01 | 0.00 | 9.83E-01 |
| RP11-462G12.1 | 0.16  | 4.08E-01 | 0.00 | 9.83E-01 |
| RP11-519C12.1 | 0.12  | 5.47E-01 | 0.00 | 9.83E-01 |
| RP3-461F17.3  | -0.05 | 7.92E-01 | 0.00 | 9.83E-01 |
| RPL21P32      | -0.05 | 7.98E-01 | 0.00 | 9.83E-01 |
| RPSAP18       | 0.01  | 9.47E-01 | 0.00 | 9.83E-01 |
| SCNN1G        | 0.22  | 2.70E-01 | 0.00 | 9.83E-01 |
| SIGLEC16      | -0.26 | 1.80E-01 | 0.00 | 9.83E-01 |
| SNX18P7       | -0.01 | 9.42E-01 | 0.00 | 9.83E-01 |
| ST3GAL6-AS1   | -0.19 | 3.36E-01 | 0.00 | 9.83E-01 |
| STT3B         | 0.17  | 3.94E-01 | 0.00 | 9.83E-01 |
| TDG           | 0.18  | 3.62E-01 | 0.00 | 9.83E-01 |
| TPT1P5        | -0.05 | 7.89E-01 | 0.00 | 9.83E-01 |
| XLOC_005510   | 0.16  | 4.26E-01 | 0.00 | 9.83E-01 |
| AC012065.5    | -0.19 | 3.40E-01 | 0.00 | 9.84E-01 |
| ANKRD20A10P   | -0.36 | 6.05E-02 | 0.00 | 9.84E-01 |
| ATP6V0A1      | 0.13  | 4.93E-01 | 0.00 | 9.84E-01 |
| BMP7-AS1      | 0.11  | 5.60E-01 | 0.00 | 9.84E-01 |
| C2orf81       | 0.15  | 4.39E-01 | 0.00 | 9.84E-01 |
| CNN2P9        | -0.18 | 3.66E-01 | 0.00 | 9.84E-01 |
| DAP           | -0.05 | 8.09E-01 | 0.00 | 9.84E-01 |
| EIF3I         | 0.18  | 3.48E-01 | 0.00 | 9.84E-01 |
| FBXO43        | 0.18  | 3.52E-01 | 0.00 | 9.84E-01 |
| G34428        | -0.17 | 3.89E-01 | 0.00 | 9.84E-01 |
| G8753         | -0.18 | 3.48E-01 | 0.00 | 9.84E-01 |
| GTF2H1        | 0.10  | 6.26E-01 | 0.00 | 9.84E-01 |
| HTRA4         | 0.00  | 9.86E-01 | 0.00 | 9.84E-01 |
| IGIP          | -0.13 | 5.18E-01 | 0.00 | 9.84E-01 |
| ILVBL         | -0.01 | 9.64E-01 | 0.00 | 9.84E-01 |
| INE1          | 0.07  | 7.36E-01 | 0.00 | 9.84E-01 |
| IQCA1         | 0.11  | 5.84E-01 | 0.00 | 9.84E-01 |

|               |       |          |      |          |
|---------------|-------|----------|------|----------|
| LA16c-306A4.1 | -0.19 | 3.32E-01 | 0.00 | 9.84E-01 |
| LDLRAD4-AS1   | -0.22 | 2.60E-01 | 0.00 | 9.84E-01 |
| NAV2-AS3      | -0.02 | 9.39E-01 | 0.00 | 9.84E-01 |
| NUP214        | -0.10 | 6.12E-01 | 0.00 | 9.84E-01 |
| PACSIN1       | -0.11 | 5.65E-01 | 0.00 | 9.84E-01 |
| PTHLH         | -0.03 | 8.69E-01 | 0.00 | 9.84E-01 |
| RARS          | 0.10  | 6.28E-01 | 0.00 | 9.84E-01 |
| RP11-269G24.7 | 0.08  | 7.04E-01 | 0.00 | 9.84E-01 |
| RP11-278A23.2 | 0.29  | 1.36E-01 | 0.00 | 9.84E-01 |
| RP11-39K24.4  | 0.04  | 8.50E-01 | 0.00 | 9.84E-01 |
| RP11-888D10.3 | -0.02 | 9.15E-01 | 0.00 | 9.84E-01 |
| RP3-408N23.4  | 0.04  | 8.26E-01 | 0.00 | 9.84E-01 |
| RPL7L1P8      | 0.08  | 6.80E-01 | 0.00 | 9.84E-01 |
| SHISA2        | -0.09 | 6.33E-01 | 0.00 | 9.84E-01 |
| SLC16A10      | 0.43  | 2.25E-02 | 0.00 | 9.84E-01 |
| TMCO1         | 0.13  | 5.22E-01 | 0.00 | 9.84E-01 |
| TMEM41B       | 0.21  | 2.88E-01 | 0.00 | 9.84E-01 |
| VAMP3         | 0.06  | 7.46E-01 | 0.00 | 9.84E-01 |
| ABCF2         | 0.32  | 1.02E-01 | 0.00 | 9.86E-01 |
| AC090286.2    | -0.04 | 8.45E-01 | 0.00 | 9.86E-01 |
| AL356776.1    | -0.14 | 4.63E-01 | 0.00 | 9.86E-01 |
| C11orf24      | 0.13  | 5.17E-01 | 0.00 | 9.86E-01 |
| C12orf71      | -0.36 | 5.99E-02 | 0.00 | 9.86E-01 |
| C18orf15      | 0.22  | 2.54E-01 | 0.00 | 9.86E-01 |
| DDR2          | -0.12 | 5.51E-01 | 0.00 | 9.86E-01 |
| ETV5-AS1      | -0.48 | 8.97E-03 | 0.00 | 9.86E-01 |
| FADS6         | -0.05 | 8.14E-01 | 0.00 | 9.86E-01 |
| FIS1          | 0.08  | 6.96E-01 | 0.00 | 9.86E-01 |
| GLIS1         | -0.05 | 8.16E-01 | 0.00 | 9.86E-01 |
| HIST1H4C      | -0.09 | 6.46E-01 | 0.00 | 9.86E-01 |
| HS2ST1        | 0.13  | 4.94E-01 | 0.00 | 9.86E-01 |
| HSPA8         | 0.04  | 8.40E-01 | 0.00 | 9.86E-01 |
| KLHL22-IT1    | -0.17 | 3.86E-01 | 0.00 | 9.86E-01 |
| KRT17P3       | 0.08  | 6.94E-01 | 0.00 | 9.86E-01 |
| LCMT1         | 0.38  | 4.80E-02 | 0.00 | 9.86E-01 |
| LINC00222     | -0.24 | 2.26E-01 | 0.00 | 9.86E-01 |
| LINC00543     | 0.30  | 1.15E-01 | 0.00 | 9.86E-01 |
| NKPD1         | 0.27  | 1.69E-01 | 0.00 | 9.86E-01 |
| PCCB          | 0.04  | 8.36E-01 | 0.00 | 9.86E-01 |
| PIP4K2C       | 0.29  | 1.31E-01 | 0.00 | 9.86E-01 |
| PLPP2         | -0.25 | 1.92E-01 | 0.00 | 9.86E-01 |
| PTCD2         | 0.08  | 6.96E-01 | 0.00 | 9.86E-01 |
| RAB3GAP1      | 0.15  | 4.52E-01 | 0.00 | 9.86E-01 |
| RGS7          | -0.26 | 1.75E-01 | 0.00 | 9.86E-01 |
| RP11-191G24.1 | 0.10  | 6.26E-01 | 0.00 | 9.86E-01 |
| RP11-317N8.4  | -0.13 | 5.01E-01 | 0.00 | 9.86E-01 |
| RP5-951N9.2   | -0.08 | 7.01E-01 | 0.00 | 9.86E-01 |

|               |       |          |      |          |
|---------------|-------|----------|------|----------|
| RPL17         | 0.14  | 4.84E-01 | 0.00 | 9.86E-01 |
| RPL4P6        | -0.15 | 4.61E-01 | 0.00 | 9.86E-01 |
| RPLP2         | 0.21  | 2.82E-01 | 0.00 | 9.86E-01 |
| SIGLEC7       | 0.06  | 7.49E-01 | 0.00 | 9.86E-01 |
| SNAI3-AS1     | 0.17  | 3.94E-01 | 0.00 | 9.86E-01 |
| SPATA5        | 0.01  | 9.71E-01 | 0.00 | 9.86E-01 |
| SULT4A1       | -0.17 | 3.82E-01 | 0.00 | 9.86E-01 |
| TERF2IP       | 0.16  | 4.13E-01 | 0.00 | 9.86E-01 |
| TMEM209       | -0.30 | 1.26E-01 | 0.00 | 9.86E-01 |
| TPSB2         | 0.10  | 6.14E-01 | 0.00 | 9.86E-01 |
| TRIM47        | 0.07  | 7.15E-01 | 0.00 | 9.86E-01 |
| ZBTB12P1      | 0.06  | 7.53E-01 | 0.00 | 9.86E-01 |
| ZBPB          | -0.26 | 1.76E-01 | 0.00 | 9.86E-01 |
| ACBD5         | 0.07  | 7.41E-01 | 0.00 | 9.87E-01 |
| ACLY          | 0.18  | 3.49E-01 | 0.00 | 9.87E-01 |
| AGTR1         | -0.16 | 4.18E-01 | 0.00 | 9.87E-01 |
| ANAPC15       | 0.09  | 6.45E-01 | 0.00 | 9.87E-01 |
| AREL1         | 0.22  | 2.53E-01 | 0.00 | 9.87E-01 |
| BAG2          | -0.19 | 3.34E-01 | 0.00 | 9.87E-01 |
| C12orf40      | -0.13 | 5.18E-01 | 0.00 | 9.87E-01 |
| CD27          | 0.02  | 9.18E-01 | 0.00 | 9.87E-01 |
| CEPT1         | 0.03  | 8.79E-01 | 0.00 | 9.87E-01 |
| CTD-2555K7.2  | 0.16  | 4.14E-01 | 0.00 | 9.87E-01 |
| EBAG9         | 0.16  | 4.13E-01 | 0.00 | 9.87E-01 |
| ENPP7P1       | 0.05  | 8.16E-01 | 0.00 | 9.87E-01 |
| FANCD2OS      | -0.29 | 1.28E-01 | 0.00 | 9.87E-01 |
| FCMR          | 0.02  | 9.17E-01 | 0.00 | 9.87E-01 |
| G1862         | 0.07  | 7.24E-01 | 0.00 | 9.87E-01 |
| G24602        | -0.08 | 6.98E-01 | 0.00 | 9.87E-01 |
| GAPVD1        | 0.00  | 9.93E-01 | 0.00 | 9.87E-01 |
| GAS5          | 0.16  | 4.12E-01 | 0.00 | 9.87E-01 |
| GLIS2         | -0.27 | 1.63E-01 | 0.00 | 9.87E-01 |
| HECTD1        | 0.19  | 3.44E-01 | 0.00 | 9.87E-01 |
| HPS6          | 0.08  | 6.76E-01 | 0.00 | 9.87E-01 |
| IGLV3-21      | 0.20  | 3.02E-01 | 0.00 | 9.87E-01 |
| LARS          | 0.12  | 5.52E-01 | 0.00 | 9.87E-01 |
| MAOA          | 0.36  | 6.13E-02 | 0.00 | 9.87E-01 |
| MAST3         | 0.05  | 7.83E-01 | 0.00 | 9.87E-01 |
| MRFAP1L1      | 0.18  | 3.49E-01 | 0.00 | 9.87E-01 |
| MRPL23        | 0.13  | 5.03E-01 | 0.00 | 9.87E-01 |
| NDUFAF1       | -0.11 | 5.69E-01 | 0.00 | 9.87E-01 |
| NUDT12        | 0.17  | 3.93E-01 | 0.00 | 9.87E-01 |
| PDLIM1        | -0.06 | 7.47E-01 | 0.00 | 9.87E-01 |
| PRPS1         | 0.03  | 8.95E-01 | 0.00 | 9.87E-01 |
| RP11-1055B8.1 | 0.07  | 7.19E-01 | 0.00 | 9.87E-01 |
| RP11-12G12.7  | 0.20  | 3.16E-01 | 0.00 | 9.87E-01 |
| RP11-453E17.3 | 0.07  | 7.21E-01 | 0.00 | 9.87E-01 |

|               |       |          |      |          |
|---------------|-------|----------|------|----------|
| RP11-849F2.5  | -0.12 | 5.38E-01 | 0.00 | 9.87E-01 |
| RP11-855A2.1  | 0.04  | 8.36E-01 | 0.00 | 9.87E-01 |
| RP11-972P1.11 | 0.09  | 6.42E-01 | 0.00 | 9.87E-01 |
| RRS1          | 0.15  | 4.34E-01 | 0.00 | 9.87E-01 |
| SBDSP1        | 0.13  | 5.21E-01 | 0.00 | 9.87E-01 |
| SEC14L1       | 0.23  | 2.33E-01 | 0.00 | 9.87E-01 |
| SLC25A45      | 0.11  | 5.92E-01 | 0.00 | 9.87E-01 |
| TARS          | 0.12  | 5.47E-01 | 0.00 | 9.87E-01 |
| TDRD9         | 0.06  | 7.75E-01 | 0.00 | 9.87E-01 |
| TNXB          | -0.23 | 2.29E-01 | 0.00 | 9.87E-01 |
| TOM1L1        | -0.06 | 7.64E-01 | 0.00 | 9.87E-01 |
| TPRG1-AS1     | 0.06  | 7.65E-01 | 0.00 | 9.87E-01 |
| ABCA3         | -0.19 | 3.42E-01 | 0.00 | 9.88E-01 |
| AC002543.2    | -0.20 | 3.14E-01 | 0.00 | 9.88E-01 |
| AC022154.7    | 0.09  | 6.43E-01 | 0.00 | 9.88E-01 |
| ADNP2         | -0.01 | 9.45E-01 | 0.00 | 9.88E-01 |
| APCDD1        | -0.03 | 8.92E-01 | 0.00 | 9.88E-01 |
| ARC           | 0.23  | 2.33E-01 | 0.00 | 9.88E-01 |
| ARHGAP17      | -0.22 | 2.56E-01 | 0.00 | 9.88E-01 |
| ATP5A1        | 0.21  | 2.78E-01 | 0.00 | 9.88E-01 |
| CTC-327F10.5  | -0.16 | 4.18E-01 | 0.00 | 9.88E-01 |
| EIF3J         | 0.19  | 3.37E-01 | 0.00 | 9.88E-01 |
| ERP29         | -0.08 | 6.86E-01 | 0.00 | 9.88E-01 |
| FBXW7         | -0.04 | 8.49E-01 | 0.00 | 9.88E-01 |
| G22682        | 0.16  | 4.25E-01 | 0.00 | 9.88E-01 |
| G23276        | -0.13 | 4.99E-01 | 0.00 | 9.88E-01 |
| LEP           | -0.10 | 6.04E-01 | 0.00 | 9.88E-01 |
| LGALS8        | 0.29  | 1.36E-01 | 0.00 | 9.88E-01 |
| LINC01389     | -0.05 | 8.00E-01 | 0.00 | 9.88E-01 |
| LNPEP         | 0.04  | 8.38E-01 | 0.00 | 9.88E-01 |
| MIR5695       | 0.04  | 8.59E-01 | 0.00 | 9.88E-01 |
| MYL12A        | 0.16  | 4.13E-01 | 0.00 | 9.88E-01 |
| PLAGL2        | 0.24  | 2.17E-01 | 0.00 | 9.88E-01 |
| PRELID3A      | -0.22 | 2.66E-01 | 0.00 | 9.88E-01 |
| RP11-131M11.2 | -0.34 | 7.54E-02 | 0.00 | 9.88E-01 |
| RP11-303G3.9  | -0.37 | 5.08E-02 | 0.00 | 9.88E-01 |
| RP11-354E11.2 | 0.10  | 5.95E-01 | 0.00 | 9.88E-01 |
| RP11-511H9.3  | -0.24 | 2.15E-01 | 0.00 | 9.88E-01 |
| RP11-62H7.2   | 0.20  | 2.97E-01 | 0.00 | 9.88E-01 |
| RP11-641C17.4 | -0.14 | 4.87E-01 | 0.00 | 9.88E-01 |
| RP11-679B19.2 | -0.37 | 5.38E-02 | 0.00 | 9.88E-01 |
| RP11-689P11.2 | -0.10 | 6.08E-01 | 0.00 | 9.88E-01 |
| RP11-689P11.3 | -0.14 | 4.63E-01 | 0.00 | 9.88E-01 |
| RP11-794A8.1  | 0.04  | 8.29E-01 | 0.00 | 9.88E-01 |
| RP11-996F15.5 | -0.06 | 7.57E-01 | 0.00 | 9.88E-01 |
| RPL7A         | 0.13  | 5.24E-01 | 0.00 | 9.88E-01 |
| SH3GL1P2      | -0.01 | 9.60E-01 | 0.00 | 9.88E-01 |

|                |       |          |      |          |
|----------------|-------|----------|------|----------|
| SLC35E1P1      | 0.12  | 5.43E-01 | 0.00 | 9.88E-01 |
| SND1-IT1       | -0.11 | 5.85E-01 | 0.00 | 9.88E-01 |
| TPR            | -0.18 | 3.69E-01 | 0.00 | 9.88E-01 |
| TRAJ7          | -0.07 | 7.20E-01 | 0.00 | 9.88E-01 |
| TSPAN16        | -0.25 | 1.97E-01 | 0.00 | 9.88E-01 |
| TUBA1B         | -0.09 | 6.36E-01 | 0.00 | 9.88E-01 |
| AC007790.4     | -0.27 | 1.60E-01 | 0.00 | 9.89E-01 |
| AC011753.5     | 0.05  | 8.15E-01 | 0.00 | 9.89E-01 |
| ARID4A         | -0.36 | 6.01E-02 | 0.00 | 9.89E-01 |
| ATAD3A         | 0.04  | 8.24E-01 | 0.00 | 9.89E-01 |
| CROCC2         | -0.03 | 8.68E-01 | 0.00 | 9.89E-01 |
| CTD-2651B20.3  | -0.13 | 5.05E-01 | 0.00 | 9.89E-01 |
| CTD-3252C9.4   | -0.11 | 5.87E-01 | 0.00 | 9.89E-01 |
| DPM3           | 0.15  | 4.44E-01 | 0.00 | 9.89E-01 |
| ECEL1          | -0.16 | 4.24E-01 | 0.00 | 9.89E-01 |
| G40907         | 0.04  | 8.51E-01 | 0.00 | 9.89E-01 |
| GBP2           | 0.08  | 6.81E-01 | 0.00 | 9.89E-01 |
| GDPD2          | -0.13 | 5.19E-01 | 0.00 | 9.89E-01 |
| IRF6           | -0.15 | 4.61E-01 | 0.00 | 9.89E-01 |
| LINC00622      | -0.10 | 6.23E-01 | 0.00 | 9.89E-01 |
| LINC00675      | 0.23  | 2.38E-01 | 0.00 | 9.89E-01 |
| MORN3          | 0.15  | 4.58E-01 | 0.00 | 9.89E-01 |
| MUL1           | 0.13  | 5.21E-01 | 0.00 | 9.89E-01 |
| NFYB           | -0.14 | 4.74E-01 | 0.00 | 9.89E-01 |
| RNA5SP260      | -0.04 | 8.44E-01 | 0.00 | 9.89E-01 |
| RP11-1017G21.5 | 0.07  | 7.05E-01 | 0.00 | 9.89E-01 |
| RP11-127I20.8  | 0.17  | 3.76E-01 | 0.00 | 9.89E-01 |
| RP11-236P24.1  | 0.05  | 8.00E-01 | 0.00 | 9.89E-01 |
| RP11-312B8.1   | 0.00  | 9.94E-01 | 0.00 | 9.89E-01 |
| RP11-318C24.1  | 0.25  | 2.02E-01 | 0.00 | 9.89E-01 |
| RP11-347C18.5  | -0.08 | 6.87E-01 | 0.00 | 9.89E-01 |
| RP11-546M21.6  | -0.32 | 9.96E-02 | 0.00 | 9.89E-01 |
| RP11-800A3.3   | 0.16  | 4.29E-01 | 0.00 | 9.89E-01 |
| RSU1P3         | -0.01 | 9.55E-01 | 0.00 | 9.89E-01 |
| SCAMP1         | 0.24  | 2.14E-01 | 0.00 | 9.89E-01 |
| SH3RF2         | 0.00  | 9.82E-01 | 0.00 | 9.89E-01 |
| SLC25A6P3      | -0.21 | 2.80E-01 | 0.00 | 9.89E-01 |
| SMG1P3         | -0.05 | 7.96E-01 | 0.00 | 9.89E-01 |
| SOCS2          | -0.21 | 2.91E-01 | 0.00 | 9.89E-01 |
| SSC4D          | 0.25  | 2.08E-01 | 0.00 | 9.89E-01 |
| TMEM245        | 0.03  | 8.67E-01 | 0.00 | 9.89E-01 |
| TP53I11        | 0.12  | 5.31E-01 | 0.00 | 9.89E-01 |
| TRAJ27         | -0.38 | 4.90E-02 | 0.00 | 9.89E-01 |
| U47924.29      | 0.22  | 2.51E-01 | 0.00 | 9.89E-01 |
| XLOC_003405    | -0.14 | 4.88E-01 | 0.00 | 9.89E-01 |
| YBX3           | 0.12  | 5.49E-01 | 0.00 | 9.89E-01 |
| ZFYVE21        | 0.03  | 8.68E-01 | 0.00 | 9.89E-01 |

|               |       |          |      |          |
|---------------|-------|----------|------|----------|
| CNTD2         | -0.19 | 3.32E-01 | 0.00 | 9.90E-01 |
| CTD-2095E4.5  | -0.16 | 4.17E-01 | 0.00 | 9.90E-01 |
| DRAXIN        | 0.25  | 2.04E-01 | 0.00 | 9.90E-01 |
| EIF4A2P1      | -0.13 | 5.05E-01 | 0.00 | 9.90E-01 |
| ELF1          | 0.12  | 5.54E-01 | 0.00 | 9.90E-01 |
| G26223        | 0.10  | 6.06E-01 | 0.00 | 9.90E-01 |
| G4388         | 0.07  | 7.16E-01 | 0.00 | 9.90E-01 |
| GNAQ          | -0.02 | 9.04E-01 | 0.00 | 9.90E-01 |
| GPATCH3       | -0.03 | 8.95E-01 | 0.00 | 9.90E-01 |
| ICA1L         | -0.28 | 1.43E-01 | 0.00 | 9.90E-01 |
| IL9           | -0.08 | 6.87E-01 | 0.00 | 9.90E-01 |
| KRT32         | 0.06  | 7.80E-01 | 0.00 | 9.90E-01 |
| LAT           | -0.06 | 7.72E-01 | 0.00 | 9.90E-01 |
| NUDT19        | 0.26  | 1.90E-01 | 0.00 | 9.90E-01 |
| PFN1P2        | -0.13 | 5.19E-01 | 0.00 | 9.90E-01 |
| PIGA          | 0.15  | 4.48E-01 | 0.00 | 9.90E-01 |
| PMS2P5        | 0.17  | 3.90E-01 | 0.00 | 9.90E-01 |
| RN7SL308P     | -0.07 | 7.23E-01 | 0.00 | 9.90E-01 |
| RP11-142O6.1  | -0.05 | 8.03E-01 | 0.00 | 9.90E-01 |
| RP11-325K4.3  | -0.39 | 4.14E-02 | 0.00 | 9.90E-01 |
| RP11-337N6.2  | 0.20  | 2.97E-01 | 0.00 | 9.90E-01 |
| RP11-480I12.5 | 0.35  | 6.66E-02 | 0.00 | 9.90E-01 |
| RP11-486G15.1 | -0.04 | 8.31E-01 | 0.00 | 9.90E-01 |
| RP11-545I5.3  | 0.04  | 8.55E-01 | 0.00 | 9.90E-01 |
| RP11-563J2.3  | -0.18 | 3.69E-01 | 0.00 | 9.90E-01 |
| RP11-73B2.6   | 0.00  | 9.83E-01 | 0.00 | 9.90E-01 |
| RP11-83B20.4  | -0.08 | 6.71E-01 | 0.00 | 9.90E-01 |
| RP4-740C4.7   | -0.19 | 3.35E-01 | 0.00 | 9.90E-01 |
| SNORA80       | 0.03  | 8.87E-01 | 0.00 | 9.90E-01 |
| UTP3          | 0.12  | 5.52E-01 | 0.00 | 9.90E-01 |
| XLOC_007800   | -0.16 | 4.08E-01 | 0.00 | 9.90E-01 |
| XLOC_008642   | -0.19 | 3.36E-01 | 0.00 | 9.90E-01 |
| XLOC_009001   | -0.07 | 7.32E-01 | 0.00 | 9.90E-01 |
| AC004461.4    | -0.04 | 8.39E-01 | 0.00 | 9.92E-01 |
| G16276        | -0.36 | 5.62E-02 | 0.00 | 9.92E-01 |
| HIST1H2BG     | -0.06 | 7.79E-01 | 0.00 | 9.92E-01 |
| MICAL3        | -0.44 | 1.86E-02 | 0.00 | 9.92E-01 |
| MTND4P12      | -0.09 | 6.58E-01 | 0.00 | 9.92E-01 |
| RNU6-529P     | 0.00  | 9.97E-01 | 0.00 | 9.92E-01 |
| RP11-22H5.1   | -0.12 | 5.56E-01 | 0.00 | 9.92E-01 |
| RP11-317F20.2 | 0.11  | 5.60E-01 | 0.00 | 9.92E-01 |
| RP11-424C20.2 | 0.05  | 7.87E-01 | 0.00 | 9.92E-01 |
| RP11-676J12.6 | -0.08 | 6.97E-01 | 0.00 | 9.92E-01 |
| RP11-747H12.5 | -0.04 | 8.26E-01 | 0.00 | 9.92E-01 |
| RP11-864I4.3  | -0.25 | 1.94E-01 | 0.00 | 9.92E-01 |
| TIGD5         | 0.26  | 1.87E-01 | 0.00 | 9.92E-01 |
| TMEM115       | -0.04 | 8.42E-01 | 0.00 | 9.92E-01 |

|                       |       |          |      |          |
|-----------------------|-------|----------|------|----------|
| <b>XLOC_008883</b>    | 0.21  | 2.90E-01 | 0.00 | 9.92E-01 |
| <b>AAAS</b>           | -0.21 | 2.79E-01 | 0.00 | 9.92E-01 |
| <b>ATP6V1G1</b>       | 0.25  | 1.93E-01 | 0.00 | 9.92E-01 |
| <b>CLPB</b>           | 0.03  | 8.88E-01 | 0.00 | 9.92E-01 |
| <b>G26459</b>         | 0.08  | 6.87E-01 | 0.00 | 9.92E-01 |
| <b>G2927</b>          | 0.39  | 3.94E-02 | 0.00 | 9.92E-01 |
| <b>GZF1</b>           | 0.19  | 3.39E-01 | 0.00 | 9.92E-01 |
| <b>HOXB6</b>          | 0.01  | 9.51E-01 | 0.00 | 9.92E-01 |
| <b>KDR</b>            | 0.01  | 9.49E-01 | 0.00 | 9.92E-01 |
| <b>PXN-AS1</b>        | 0.27  | 1.61E-01 | 0.00 | 9.92E-01 |
| <b>RP1-59D14.8</b>    | 0.24  | 2.21E-01 | 0.00 | 9.92E-01 |
| <b>RP11-429J17.7</b>  | 0.42  | 2.46E-02 | 0.00 | 9.92E-01 |
| <b>RP11-755E23.2</b>  | -0.22 | 2.70E-01 | 0.00 | 9.92E-01 |
| <b>SEMA6C</b>         | -0.18 | 3.49E-01 | 0.00 | 9.92E-01 |
| <b>TMEM30B</b>        | 0.32  | 1.01E-01 | 0.00 | 9.92E-01 |
| <b>BRWD1-AS1</b>      | -0.03 | 8.71E-01 | 0.00 | 9.93E-01 |
| <b>CAP1</b>           | 0.23  | 2.48E-01 | 0.00 | 9.93E-01 |
| <b>CARS-AS1</b>       | 0.08  | 6.91E-01 | 0.00 | 9.93E-01 |
| <b>CCDC26</b>         | -0.12 | 5.56E-01 | 0.00 | 9.93E-01 |
| <b>CTC-339F2.2</b>    | -0.04 | 8.37E-01 | 0.00 | 9.93E-01 |
| <b>CTC-559E9.8</b>    | 0.01  | 9.47E-01 | 0.00 | 9.93E-01 |
| <b>DUSP27</b>         | 0.09  | 6.62E-01 | 0.00 | 9.93E-01 |
| <b>ERCC5</b>          | -0.11 | 5.60E-01 | 0.00 | 9.93E-01 |
| <b>ESYT1</b>          | 0.13  | 5.23E-01 | 0.00 | 9.93E-01 |
| <b>FOXH1</b>          | 0.22  | 2.66E-01 | 0.00 | 9.93E-01 |
| <b>FTSJ1</b>          | 0.13  | 4.97E-01 | 0.00 | 9.93E-01 |
| <b>G36414</b>         | -0.04 | 8.30E-01 | 0.00 | 9.93E-01 |
| <b>GAPDHP39</b>       | 0.03  | 8.75E-01 | 0.00 | 9.93E-01 |
| <b>HIST1H2APS3</b>    | -0.12 | 5.59E-01 | 0.00 | 9.93E-01 |
| <b>IGFBP7-AS1</b>     | 0.12  | 5.30E-01 | 0.00 | 9.93E-01 |
| <b>ILKAP</b>          | 0.12  | 5.55E-01 | 0.00 | 9.93E-01 |
| <b>LIFR</b>           | -0.38 | 4.41E-02 | 0.00 | 9.93E-01 |
| <b>LINC01451</b>      | 0.09  | 6.35E-01 | 0.00 | 9.93E-01 |
| <b>LIPT2</b>          | 0.17  | 3.89E-01 | 0.00 | 9.93E-01 |
| <b>MTRF1</b>          | -0.07 | 7.35E-01 | 0.00 | 9.93E-01 |
| <b>NAT1</b>           | 0.17  | 3.84E-01 | 0.00 | 9.93E-01 |
| <b>PLPP6</b>          | 0.41  | 2.90E-02 | 0.00 | 9.93E-01 |
| <b>RHOJ</b>           | -0.36 | 6.18E-02 | 0.00 | 9.93E-01 |
| <b>RILPL1</b>         | -0.27 | 1.69E-01 | 0.00 | 9.93E-01 |
| <b>RNF103-CHMP3</b>   | -0.16 | 4.30E-01 | 0.00 | 9.93E-01 |
| <b>RNU6-1310P</b>     | -0.07 | 7.22E-01 | 0.00 | 9.93E-01 |
| <b>RP11-1020A11.1</b> | 0.05  | 7.97E-01 | 0.00 | 9.93E-01 |
| <b>RP11-474I11.8</b>  | -0.29 | 1.29E-01 | 0.00 | 9.93E-01 |
| <b>RP11-713P17.4</b>  | -0.07 | 7.42E-01 | 0.00 | 9.93E-01 |
| <b>RP11-73M18.10</b>  | 0.07  | 7.18E-01 | 0.00 | 9.93E-01 |
| <b>RP13-870H17.3</b>  | 0.01  | 9.57E-01 | 0.00 | 9.93E-01 |
| <b>RPL7P57</b>        | -0.33 | 8.32E-02 | 0.00 | 9.93E-01 |

|                       |       |          |      |          |
|-----------------------|-------|----------|------|----------|
| <b>S100B</b>          | 0.25  | 2.00E-01 | 0.00 | 9.93E-01 |
| <b>SNORA2</b>         | 0.01  | 9.60E-01 | 0.00 | 9.93E-01 |
| <b>TAF13</b>          | 0.06  | 7.68E-01 | 0.00 | 9.93E-01 |
| <b>TMEM163</b>        | -0.05 | 8.03E-01 | 0.00 | 9.93E-01 |
| <b>UBE2D3</b>         | 0.10  | 6.22E-01 | 0.00 | 9.93E-01 |
| <b>VPS26AP1</b>       | -0.26 | 1.80E-01 | 0.00 | 9.93E-01 |
| <b>ZNF579</b>         | 0.11  | 5.68E-01 | 0.00 | 9.93E-01 |
| <b>AC000003.1</b>     | -0.16 | 4.18E-01 | 0.00 | 9.94E-01 |
| <b>AC025442.3</b>     | -0.28 | 1.45E-01 | 0.00 | 9.94E-01 |
| <b>ADAMTS6</b>        | -0.14 | 4.63E-01 | 0.00 | 9.94E-01 |
| <b>C22orf29</b>       | -0.09 | 6.65E-01 | 0.00 | 9.94E-01 |
| <b>COX7BP2</b>        | -0.13 | 5.22E-01 | 0.00 | 9.94E-01 |
| <b>FIGF</b>           | 0.04  | 8.54E-01 | 0.00 | 9.94E-01 |
| <b>HIST1H2AL</b>      | 0.02  | 9.34E-01 | 0.00 | 9.94E-01 |
| <b>HIST2H2AC</b>      | -0.03 | 8.83E-01 | 0.00 | 9.94E-01 |
| <b>KIF11</b>          | 0.06  | 7.44E-01 | 0.00 | 9.94E-01 |
| <b>NBEAL1</b>         | -0.02 | 9.25E-01 | 0.00 | 9.94E-01 |
| <b>NCBP2-AS2</b>      | 0.15  | 4.54E-01 | 0.00 | 9.94E-01 |
| <b>PARL</b>           | 0.09  | 6.66E-01 | 0.00 | 9.94E-01 |
| <b>RDH10</b>          | 0.37  | 5.44E-02 | 0.00 | 9.94E-01 |
| <b>RNU6-805P</b>      | -0.09 | 6.51E-01 | 0.00 | 9.94E-01 |
| <b>RP11-315D16.4</b>  | -0.34 | 7.42E-02 | 0.00 | 9.94E-01 |
| <b>RP11-613D13.5</b>  | 0.05  | 8.03E-01 | 0.00 | 9.94E-01 |
| <b>RP11-659P15.1</b>  | -0.09 | 6.60E-01 | 0.00 | 9.94E-01 |
| <b>RP11-720L3.1</b>   | -0.06 | 7.78E-01 | 0.00 | 9.94E-01 |
| <b>SMARCA5</b>        | 0.20  | 3.17E-01 | 0.00 | 9.94E-01 |
| <b>SPIN1</b>          | -0.12 | 5.56E-01 | 0.00 | 9.94E-01 |
| <b>TCF7L2</b>         | -0.14 | 4.91E-01 | 0.00 | 9.94E-01 |
| <b>TSPAN3</b>         | 0.03  | 8.85E-01 | 0.00 | 9.94E-01 |
| <b>XLOC_003662</b>    | -0.01 | 9.54E-01 | 0.00 | 9.94E-01 |
| <b>ALG2</b>           | 0.15  | 4.35E-01 | 0.00 | 9.94E-01 |
| <b>EIF3H</b>          | -0.02 | 9.26E-01 | 0.00 | 9.94E-01 |
| <b>GOLGA3</b>         | 0.01  | 9.60E-01 | 0.00 | 9.94E-01 |
| <b>LNX2</b>           | 0.04  | 8.32E-01 | 0.00 | 9.94E-01 |
| <b>MLLT11</b>         | 0.13  | 5.09E-01 | 0.00 | 9.94E-01 |
| <b>MRPS21P9</b>       | -0.22 | 2.66E-01 | 0.00 | 9.94E-01 |
| <b>NWD1</b>           | 0.35  | 6.64E-02 | 0.00 | 9.94E-01 |
| <b>PIP4K2A</b>        | -0.03 | 8.85E-01 | 0.00 | 9.94E-01 |
| <b>RBM18</b>          | 0.23  | 2.48E-01 | 0.00 | 9.94E-01 |
| <b>RN7SL174P</b>      | 0.12  | 5.42E-01 | 0.00 | 9.94E-01 |
| <b>RNF183</b>         | -0.16 | 4.02E-01 | 0.00 | 9.94E-01 |
| <b>RP11-1275H24.2</b> | -0.44 | 1.91E-02 | 0.00 | 9.94E-01 |
| <b>SPINK2</b>         | 0.36  | 6.37E-02 | 0.00 | 9.94E-01 |
| <b>STYX</b>           | 0.14  | 4.87E-01 | 0.00 | 9.94E-01 |
| <b>TUBGCP2</b>        | 0.05  | 7.86E-01 | 0.00 | 9.94E-01 |
| <b>VPS11</b>          | -0.04 | 8.25E-01 | 0.00 | 9.94E-01 |
| <b>XRCC3</b>          | 0.15  | 4.49E-01 | 0.00 | 9.94E-01 |



|               |       |          |      |          |
|---------------|-------|----------|------|----------|
| CTD-3099C6.9  | -0.25 | 1.97E-01 | 0.00 | 9.95E-01 |
| EEF1E1P1      | -0.07 | 7.05E-01 | 0.00 | 9.95E-01 |
| EREG          | 0.25  | 1.95E-01 | 0.00 | 9.95E-01 |
| FCN3          | 0.29  | 1.29E-01 | 0.00 | 9.95E-01 |
| GABRR2        | -0.20 | 3.16E-01 | 0.00 | 9.95E-01 |
| GTF2H5        | -0.01 | 9.46E-01 | 0.00 | 9.95E-01 |
| HECTD4        | -0.22 | 2.53E-01 | 0.00 | 9.95E-01 |
| IL5RA         | 0.05  | 7.95E-01 | 0.00 | 9.95E-01 |
| MBOAT2        | -0.02 | 9.04E-01 | 0.00 | 9.95E-01 |
| MIR4787       | -0.21 | 2.80E-01 | 0.00 | 9.95E-01 |
| RP11-347H15.1 | 0.39  | 3.95E-02 | 0.00 | 9.95E-01 |
| RP11-351A11.1 | 0.03  | 8.75E-01 | 0.00 | 9.95E-01 |
| RP4-717I23.2  | -0.08 | 6.79E-01 | 0.00 | 9.95E-01 |
| RPL10AP1      | 0.03  | 8.78E-01 | 0.00 | 9.95E-01 |
| RPS3AP25      | 0.15  | 4.44E-01 | 0.00 | 9.95E-01 |
| UBE2S         | 0.11  | 5.71E-01 | 0.00 | 9.95E-01 |
| VAV3-AS1      | -0.47 | 1.07E-02 | 0.00 | 9.95E-01 |
| DPY19L1P2     | 0.10  | 6.13E-01 | 0.00 | 9.95E-01 |
| FAM209A       | -0.54 | 3.17E-03 | 0.00 | 9.95E-01 |
| HIST1H2BL     | -0.06 | 7.48E-01 | 0.00 | 9.95E-01 |
| LDHAP4        | 0.10  | 6.31E-01 | 0.00 | 9.95E-01 |
| NEU3          | -0.21 | 2.87E-01 | 0.00 | 9.95E-01 |
| PCDH15        | 0.03  | 8.68E-01 | 0.00 | 9.95E-01 |
| PHC1P1        | 0.31  | 1.11E-01 | 0.00 | 9.95E-01 |
| RP11-274A11.5 | -0.04 | 8.21E-01 | 0.00 | 9.95E-01 |
| RP11-690G19.4 | -0.18 | 3.55E-01 | 0.00 | 9.95E-01 |
| SLC37A3       | 0.06  | 7.66E-01 | 0.00 | 9.95E-01 |
| TAF1C         | -0.10 | 6.22E-01 | 0.00 | 9.95E-01 |
| TRBV28        | -0.04 | 8.58E-01 | 0.00 | 9.95E-01 |
| ANAPC16       | 0.09  | 6.42E-01 | 0.00 | 9.96E-01 |
| AP000889.2    | -0.01 | 9.57E-01 | 0.00 | 9.96E-01 |
| ARPC2         | 0.13  | 5.17E-01 | 0.00 | 9.96E-01 |
| C6orf201      | 0.00  | 1.00E+00 | 0.00 | 9.96E-01 |
| CASC19        | 0.14  | 4.72E-01 | 0.00 | 9.96E-01 |
| CCAT1         | -0.12 | 5.46E-01 | 0.00 | 9.96E-01 |
| CLYBL         | -0.14 | 4.91E-01 | 0.00 | 9.96E-01 |
| COX7A2        | 0.04  | 8.59E-01 | 0.00 | 9.96E-01 |
| GZMH          | 0.05  | 7.83E-01 | 0.00 | 9.96E-01 |
| HIGD1AP16     | 0.00  | 9.94E-01 | 0.00 | 9.96E-01 |
| HSPB8         | -0.14 | 4.72E-01 | 0.00 | 9.96E-01 |
| KRTAP19-1     | -0.27 | 1.57E-01 | 0.00 | 9.96E-01 |
| LMBR1         | 0.10  | 6.12E-01 | 0.00 | 9.96E-01 |
| MIR548AC      | -0.08 | 6.90E-01 | 0.00 | 9.96E-01 |
| MRPL47        | 0.07  | 7.16E-01 | 0.00 | 9.96E-01 |
| MRPS10        | 0.13  | 5.03E-01 | 0.00 | 9.96E-01 |
| MYH7B         | 0.00  | 9.98E-01 | 0.00 | 9.96E-01 |
| NAA38         | -0.03 | 8.91E-01 | 0.00 | 9.96E-01 |

|               |       |          |      |          |
|---------------|-------|----------|------|----------|
| NSUN6         | -0.24 | 2.26E-01 | 0.00 | 9.96E-01 |
| OXR1          | 0.25  | 1.94E-01 | 0.00 | 9.96E-01 |
| PAGR1         | 0.15  | 4.37E-01 | 0.00 | 9.96E-01 |
| PHB           | 0.11  | 5.81E-01 | 0.00 | 9.96E-01 |
| PPP1CC        | 0.09  | 6.63E-01 | 0.00 | 9.96E-01 |
| PSMD13        | 0.06  | 7.70E-01 | 0.00 | 9.96E-01 |
| RAB18         | 0.05  | 7.91E-01 | 0.00 | 9.96E-01 |
| RN7SL396P     | -0.29 | 1.34E-01 | 0.00 | 9.96E-01 |
| RP11-20I23.6  | 0.13  | 5.23E-01 | 0.00 | 9.96E-01 |
| RP11-361H10.5 | -0.20 | 3.20E-01 | 0.00 | 9.96E-01 |
| RP11-423F24.3 | 0.01  | 9.54E-01 | 0.00 | 9.96E-01 |
| RP11-522L3.11 | -0.39 | 3.79E-02 | 0.00 | 9.96E-01 |
| RP11-57A1.1   | 0.36  | 6.11E-02 | 0.00 | 9.96E-01 |
| RP11-95P9.1   | 0.22  | 2.71E-01 | 0.00 | 9.96E-01 |
| RP4-713B5.2   | -0.13 | 4.94E-01 | 0.00 | 9.96E-01 |
| SH3BP5        | -0.14 | 4.67E-01 | 0.00 | 9.96E-01 |
| SNIP1         | 0.03  | 8.63E-01 | 0.00 | 9.96E-01 |
| SRGAP3-AS3    | 0.11  | 5.92E-01 | 0.00 | 9.96E-01 |
| TRAM1         | -0.01 | 9.53E-01 | 0.00 | 9.96E-01 |
| USP7          | 0.00  | 9.96E-01 | 0.00 | 9.96E-01 |
| AC097467.2    | -0.15 | 4.53E-01 | 0.00 | 9.98E-01 |
| AKAP1         | 0.01  | 9.67E-01 | 0.00 | 9.98E-01 |
| B4GALT1-AS1   | -0.11 | 5.83E-01 | 0.00 | 9.98E-01 |
| C5orf67       | 0.14  | 4.79E-01 | 0.00 | 9.98E-01 |
| CCDC12        | -0.06 | 7.62E-01 | 0.00 | 9.98E-01 |
| CPSF1         | -0.16 | 4.16E-01 | 0.00 | 9.98E-01 |
| CRNKL1        | 0.13  | 4.98E-01 | 0.00 | 9.98E-01 |
| CTB-174O21.2  | 0.07  | 7.28E-01 | 0.00 | 9.98E-01 |
| DANT2         | -0.06 | 7.62E-01 | 0.00 | 9.98E-01 |
| FAM96A        | -0.02 | 9.31E-01 | 0.00 | 9.98E-01 |
| G30492        | -0.29 | 1.36E-01 | 0.00 | 9.98E-01 |
| G36296        | -0.29 | 1.41E-01 | 0.00 | 9.98E-01 |
| GAPDHP74      | 0.06  | 7.78E-01 | 0.00 | 9.98E-01 |
| GINM1         | 0.08  | 6.79E-01 | 0.00 | 9.98E-01 |
| HM13-AS1      | -0.17 | 3.99E-01 | 0.00 | 9.98E-01 |
| ICT1          | 0.05  | 7.97E-01 | 0.00 | 9.98E-01 |
| IL24          | 0.12  | 5.53E-01 | 0.00 | 9.98E-01 |
| KBTBD12       | 0.03  | 8.67E-01 | 0.00 | 9.98E-01 |
| LINC00506     | 0.07  | 7.22E-01 | 0.00 | 9.98E-01 |
| LINC00944     | -0.09 | 6.51E-01 | 0.00 | 9.98E-01 |
| LINC01424     | -0.17 | 3.76E-01 | 0.00 | 9.98E-01 |
| LINC01579     | 0.02  | 9.14E-01 | 0.00 | 9.98E-01 |
| LSM7          | 0.05  | 8.19E-01 | 0.00 | 9.98E-01 |
| MCM3          | -0.03 | 8.70E-01 | 0.00 | 9.98E-01 |
| MYL12BP2      | -0.04 | 8.23E-01 | 0.00 | 9.98E-01 |
| NIPA1         | -0.13 | 5.20E-01 | 0.00 | 9.98E-01 |
| RARSP1        | -0.17 | 3.79E-01 | 0.00 | 9.98E-01 |

|                      |       |          |      |          |
|----------------------|-------|----------|------|----------|
| <b>RNU1-67P</b>      | 0.19  | 3.39E-01 | 0.00 | 9.98E-01 |
| <b>RP11-182M20.2</b> | -0.06 | 7.59E-01 | 0.00 | 9.98E-01 |
| <b>RP11-661A12.8</b> | 0.13  | 4.93E-01 | 0.00 | 9.98E-01 |
| <b>RPL32</b>         | 0.14  | 4.89E-01 | 0.00 | 9.98E-01 |
| <b>SPRY1</b>         | -0.14 | 4.86E-01 | 0.00 | 9.98E-01 |
| <b>TSPO2</b>         | -0.22 | 2.57E-01 | 0.00 | 9.98E-01 |
| <b>UGT1A1</b>        | -0.08 | 6.82E-01 | 0.00 | 9.98E-01 |
| <b>YAP1</b>          | 0.05  | 8.08E-01 | 0.00 | 9.98E-01 |
| <b>YBX1</b>          | 0.06  | 7.80E-01 | 0.00 | 9.98E-01 |
| <b>ZNF700</b>        | -0.21 | 2.76E-01 | 0.00 | 9.98E-01 |
| <b>ZNF90P1</b>       | 0.41  | 2.95E-02 | 0.00 | 9.98E-01 |
| <b>AC099850.1</b>    | -0.09 | 6.50E-01 | 0.00 | 9.99E-01 |
| <b>AC107081.5</b>    | 0.03  | 8.78E-01 | 0.00 | 9.99E-01 |
| <b>APELA</b>         | 0.00  | 9.89E-01 | 0.00 | 9.99E-01 |
| <b>ARIH2</b>         | 0.25  | 1.99E-01 | 0.00 | 9.99E-01 |
| <b>CACNA1C-IT3</b>   | 0.04  | 8.38E-01 | 0.00 | 9.99E-01 |
| <b>CDH11</b>         | -0.18 | 3.62E-01 | 0.00 | 9.99E-01 |
| <b>CHRM3</b>         | -0.17 | 3.89E-01 | 0.00 | 9.99E-01 |
| <b>CLDN10</b>        | -0.15 | 4.34E-01 | 0.00 | 9.99E-01 |
| <b>COMMD10</b>       | -0.20 | 3.12E-01 | 0.00 | 9.99E-01 |
| <b>CTD-2301A4.1</b>  | -0.03 | 8.67E-01 | 0.00 | 9.99E-01 |
| <b>CTD-2542C24.5</b> | -0.07 | 7.17E-01 | 0.00 | 9.99E-01 |
| <b>DDX27</b>         | 0.10  | 6.24E-01 | 0.00 | 9.99E-01 |
| <b>EDEM3</b>         | 0.18  | 3.52E-01 | 0.00 | 9.99E-01 |
| <b>G22194</b>        | 0.21  | 2.73E-01 | 0.00 | 9.99E-01 |
| <b>INSL3</b>         | 0.10  | 6.28E-01 | 0.00 | 9.99E-01 |
| <b>KIAA1658</b>      | -0.30 | 1.25E-01 | 0.00 | 9.99E-01 |
| <b>KLHL26</b>        | 0.06  | 7.50E-01 | 0.00 | 9.99E-01 |
| <b>LINC00888</b>     | -0.13 | 5.10E-01 | 0.00 | 9.99E-01 |
| <b>MAFG</b>          | 0.05  | 8.12E-01 | 0.00 | 9.99E-01 |
| <b>MYO1A</b>         | 0.14  | 4.79E-01 | 0.00 | 9.99E-01 |
| <b>NHS-AS1</b>       | 0.01  | 9.46E-01 | 0.00 | 9.99E-01 |
| <b>NSFL1C</b>        | 0.08  | 7.00E-01 | 0.00 | 9.99E-01 |
| <b>OXT</b>           | 0.11  | 5.74E-01 | 0.00 | 9.99E-01 |
| <b>PDHA1</b>         | 0.25  | 2.08E-01 | 0.00 | 9.99E-01 |
| <b>PQLC2</b>         | 0.25  | 1.92E-01 | 0.00 | 9.99E-01 |
| <b>PRADC1</b>        | 0.05  | 7.94E-01 | 0.00 | 9.99E-01 |
| <b>RP11-370I10.6</b> | -0.15 | 4.44E-01 | 0.00 | 9.99E-01 |
| <b>RP11-406H23.2</b> | -0.39 | 3.85E-02 | 0.00 | 9.99E-01 |
| <b>RP11-415F23.2</b> | -0.11 | 5.72E-01 | 0.00 | 9.99E-01 |
| <b>RP11-49K24.5</b>  | 0.11  | 5.87E-01 | 0.00 | 9.99E-01 |
| <b>RP11-93O14.2</b>  | 0.05  | 7.91E-01 | 0.00 | 9.99E-01 |
| <b>RP5-827C21.6</b>  | 0.26  | 1.89E-01 | 0.00 | 9.99E-01 |
| <b>SLC35A5</b>       | -0.14 | 4.79E-01 | 0.00 | 9.99E-01 |
| <b>SLC4A1</b>        | 0.00  | 9.82E-01 | 0.00 | 9.99E-01 |
| <b>TMEM234</b>       | -0.19 | 3.27E-01 | 0.00 | 9.99E-01 |
| <b>TNKS2</b>         | 0.03  | 8.97E-01 | 0.00 | 9.99E-01 |

|                  |       |          |      |          |
|------------------|-------|----------|------|----------|
| <b>TRBV5-4</b>   | 0.18  | 3.54E-01 | 0.00 | 9.99E-01 |
| <b>WNT6</b>      | -0.14 | 4.77E-01 | 0.00 | 9.99E-01 |
| <b>AQR</b>       | 0.05  | 7.89E-01 | 0.00 | 1.00E+00 |
| <b>ARL5A</b>     | -0.04 | 8.42E-01 | 0.00 | 1.00E+00 |
| <b>CXXC1</b>     | 0.13  | 5.02E-01 | 0.00 | 1.00E+00 |
| <b>EIF3G</b>     | 0.08  | 6.77E-01 | 0.00 | 1.00E+00 |
| <b>HAUS8</b>     | -0.02 | 9.29E-01 | 0.00 | 1.00E+00 |
| <b>HOXB4</b>     | -0.04 | 8.36E-01 | 0.00 | 1.00E+00 |
| <b>IBTK</b>      | 0.29  | 1.34E-01 | 0.00 | 1.00E+00 |
| <b>MKL2</b>      | -0.04 | 8.29E-01 | 0.00 | 1.00E+00 |
| <b>MUCL1</b>     | 0.24  | 2.09E-01 | 0.00 | 1.00E+00 |
| <b>OSGEPL1</b>   | 0.19  | 3.35E-01 | 0.00 | 1.00E+00 |
| <b>PKN2-AS1</b>  | 0.05  | 8.19E-01 | 0.00 | 1.00E+00 |
| <b>PRKXP1</b>    | 0.17  | 3.98E-01 | 0.00 | 1.00E+00 |
| <b>STX18-AS1</b> | -0.13 | 5.01E-01 | 0.00 | 1.00E+00 |
| <b>ZNF382</b>    | 0.18  | 3.52E-01 | 0.00 | 1.00E+00 |
