# Supplementary material
Source: PubMed Central journal article supplement (PMC6711380)
Supplement: NIHMS1044514-supplement-Supple_Table_12.pdf [file NIHMS1044514-supplement-Supple_Table_12.pdf]

| <b>Drug</b>            | <b>Target</b>   | <b>log2(FC) in AD lesional skin</b> |
|------------------------|-----------------|-------------------------------------|
| betamethasone          | <i>AR</i>       | -1.10                               |
| betamethasone          | <i>CCL2</i>     | 2.28                                |
| betamethasone          | <i>CCL3</i>     | 1.46                                |
| betamethasone          | <i>CCL4</i>     | 1.88                                |
| betamethasone          | <i>CXCL8</i>    | 4.12                                |
| betamethasone          | <i>NR3C2</i>    | -1.26                               |
| betamethasone valerate | <i>CD83</i>     | 1.44                                |
| betamethasone valerate | <i>CSF2</i>     | 2.07                                |
| betamethasone          | <i>VEGFA</i>    | 1.21                                |
| doxepin                | <i>CHRM1</i>    | -1.78                               |
| doxepin                | <i>CHRM2</i>    | -2.28                               |
| doxepin                | <i>CHRM4</i>    | -5.02                               |
| doxepin                | <i>CYP1A2</i>   | -3.13                               |
| doxepin                | <i>CYP2C9</i>   | -1.21                               |
| doxepin                | <i>GDPD3</i>    | 1.27                                |
| doxepin                | <i>HRH1</i>     | 1.77                                |
| doxepin                | <i>HRH2</i>     | 2.64                                |
| doxepin                | <i>SERPINA3</i> | 1.81                                |
| doxepin                | <i>SLC2A3</i>   | 1.13                                |
| fexofenadine           | <i>ABCB11</i>   | -2.39                               |
| fexofenadine           | <i>CCL17</i>    | 2.64                                |
| fexofenadine           | <i>CCL22</i>    | 2.49                                |
| fexofenadine           | <i>CCL5</i>     | 1.16                                |
| fexofenadine           | <i>HRH1</i>     | 1.77                                |
| fexofenadine           | <i>ICAM1</i>    | 1.45                                |
| fexofenadine           | <i>IL6</i>      | 1.77                                |
| fexofenadine           | <i>MMP9</i>     | 2.01                                |
| fexofenadine           | <i>SLCO2B1</i>  | 1.18                                |
| pimecrolimus           | <i>ABCB11</i>   | -2.39                               |
| pimecrolimus           | <i>ICAM1</i>    | 1.45                                |
| pimecrolimus           | <i>IL2RA</i>    | 2.83                                |
| pimecrolimus           | <i>TNFRSF4</i>  | 2.00                                |
| ribomunyl              | <i>CCR7</i>     | 2.43                                |
| ribomunyl              | <i>CD80</i>     | 1.87                                |
| ribomunyl              | <i>CD83</i>     | 1.44                                |
| ribomunyl              | <i>CSF2</i>     | 2.07                                |
| ribomunyl              | <i>IL10</i>     | 2.02                                |
| ribomunyl              | <i>IL13</i>     | 3.97                                |
| ribomunyl              | <i>IL6</i>      | 1.77                                |
| ribomunyl              | <i>ITGB2</i>    | 1.26                                |
| ribomunyl              | <i>TLR2</i>     | 1.13                                |
| tacrolimus             | <i>ABCB11</i>   | -2.39                               |
| tacrolimus             | <i>BIRC5</i>    | 1.08                                |
| tacrolimus             | <i>CCL5</i>     | 1.16                                |
| tacrolimus             | <i>CCNB2</i>    | 1.16                                |
| tacrolimus             | <i>CD2</i>      | 1.58                                |

|                     |                |       |
|---------------------|----------------|-------|
| <b>tacrolimus</b>   | <i>CD80</i>    | 1.87  |
| <b>tacrolimus</b>   | <i>CSF2</i>    | 2.07  |
| <b>tacrolimus</b>   | <i>CXCL8</i>   | 4.12  |
| <b>tacrolimus</b>   | <i>FASLG</i>   | 1.73  |
| <b>tacrolimus</b>   | <i>HSD11B1</i> | -3.72 |
| <b>tacrolimus</b>   | <i>LTA</i>     | 1.91  |
| <b>tacrolimus</b>   | <i>NOD2</i>    | 1.38  |
| <b>tacrolimus</b>   | <i>NOS2</i>    | -1.50 |
| <b>tacrolimus</b>   | <i>TGFB1</i>   | 1.02  |
| <b>triprolidine</b> | <i>CXCL8</i>   | 4.12  |
| <b>triprolidine</b> | <i>HRH1</i>    | 1.77  |
| <b>triprolidine</b> | <i>ITGAX</i>   | 2.41  |
| <b>triprolidine</b> | <i>PTPRC</i>   | 1.06  |
| <b>zinc oxide</b>   | <i>ADRB1</i>   | -1.88 |
| <b>zinc oxide</b>   | <i>AGTR1</i>   | -1.30 |
| <b>zinc oxide</b>   | <i>ALB</i>     | -1.35 |
| <b>zinc oxide</b>   | <i>AR</i>      | -1.10 |
| <b>zinc oxide</b>   | <i>CCL18</i>   | 4.90  |
| <b>zinc oxide</b>   | <i>CCL2</i>    | 2.28  |
| <b>zinc oxide</b>   | <i>CD36</i>    | 1.63  |
| <b>zinc oxide</b>   | <i>CXCL8</i>   | 4.12  |
| <b>zinc oxide</b>   | <i>ICAM1</i>   | 1.45  |
| <b>zinc oxide</b>   | <i>IL6</i>     | 1.77  |
| <b>zinc oxide</b>   | <i>MMP13</i>   | 1.27  |
| <b>zinc oxide</b>   | <i>MMP9</i>    | 2.01  |
| <b>zinc oxide</b>   | <i>ZFP36</i>   | 1.01  |
